# Supplementary material for: Kinetics of Xist -induced gene silencing can be predicted from combinations of epigenetic and genomic features
Source: HighWire-hosted journal article supplement (doi:10.1101/gr.245027.118), 2019-06-07
Supplement: Supplemental_Code.zip [file GSE121144_mRNAseq_differenciated.xlsx]

## Sheet: Differenciated
Genes	Chromosomes	Strand	B145T17	B145T17_RPKM	B145T18	B145T18_RPKM	B145T19	B145T19_RPKM	B145T20	B145T20_RPKM	B145T21	B145T21_RPKM	B145T22	B145T22_RPKM	B145T23	B145T23_RPKM	B145T24	B145T24_RPKM	B145T25	B145T25_RPKM	B145T26	B145T26_RPKM
1700019A02Rik	chr1	-	0.514286	2.6727627948433	0.489362	3.4988302492034	0.45283	3.96246841895884	0.472222	4.04361208293683	0.408696	4.62433361705425	0.531915	4.80220459725893	0.619048	5.18167438824445	0.632075	5.36938679918468	0.55102	8.25162845584053	0.491124	9.45462247232987
1700019D03Rik	chr1	-	0.955823	7.12265350430966	0.926513	6.75928753685599	0.970488	9.84756892427808	0.965116	10.432067808502	0.947368	11.86612804686	0.958713	12.0854238329916	0.932476	13.8955769621256	0.931987	14.0414470338674	0.840866	16.5708542092651	0.844028	18.4368392488464
1700025G04Rik	chr1	-	0.390625	1.95500322893453	0.383898	1.76292011071798	0.354585	1.65562294813657	0.344971	1.77159582371911	0.39705	1.998513462778	0.364394	2.15795702647767	0.354103	1.58118766251986	0.3989	1.57825474184656	0.441415	2.12364235525348	0.43522	2.15522161613161
1700034H15Rik	chr1	-	0.363636	0.315093677893809	NA	0.261021112213075	NA	0.13729150159023	NA	0.120610006791429	NA	0.104494103553431	NA	0.133360423925133	NA	0.0867906063818026	NA	0.10010470032192	NA	0.100436982624092	NA	0.106165809904476
1700047M11Rik	chr1	+	NA	0.114356547874099	0.6	0.120479748567088	NA	0.221794164775078	0.25	0.219040827870495	NA	0.0733569269263281	0.215686	0.100027346778561	NA	0.107086844461441	NA	0.101303541456602	NA	0.00956609911805013	NA	0
1700066M21Rik	chr1	+	0.493671	4.73324840548599	0.475915	4.48196369480645	0.525114	3.86265909952608	0.518315	4.7173391038651	0.54262	3.78724156261364	0.530387	3.48854482351824	0.565217	3.55518567062259	0.514754	3.46003309628918	0.447531	3.12226238373388	0.518293	3.50091372304239
2310035C23Rik	chr1	+	0.502433	6.316672796425	0.460843	6.01725143278791	0.522051	5.82138355818218	0.523161	5.90711425838642	0.489022	5.04527078564555	0.493518	5.12741157297814	0.489004	5.45545237572684	0.517037	5.43772068972014	0.521837	5.44359071704203	0.519685	5.64228041203347
2700078F05Rik	chr1	-	NA	0.0764391369267071	NA	0.0679489228421128	NA	0.027797524790817	NA	0.061493484204136	NA	0.0812929381656161	NA	0.144169236952419	NA	0.0543912770573997	NA	0.0993306683963934	0.25	0.314716993950031	NA	0.163309815924969
2810025M15Rik	chr1	+	0.584141	39.5474680658012	0.536893	39.9511822781381	0.553882	36.9928333370102	0.540834	39.286845976718	0.586381	45.1447071552552	0.567446	44.9225652037747	0.573903	41.4777288146196	0.571218	42.1579526843614	0.592556	64.365199399232	0.551479	63.7569345828769
2810408I11Rik	chr1	-	0.566667	1.40349569522454	0.44	1.44377190120909	0.516484	1.63434586044785	0.552885	1.70959635159621	0.510549	1.86811704365807	0.56701	1.95436966832403	0.551282	1.89799809205292	0.601036	2.20233191475711	0.559211	1.55256440196971	0.62037	1.7701981023013
2810459M11Rik	chr1	+	NA	0.22332803379487	NA	0.209551676588435	NA	0.204969937484872	NA	0.224577674975477	NA	0.2243141676152	NA	0.2869120804519	0.5	0.645279074581573	0.795918	0.544778233906924	0.711009	0.980790804802305	0.788104	1.07089925605765
2900009J06Rik	chr1	-	NA	0.338923230876319	0.846154	0.365186059807512	NA	0.179274692686701	NA	0.123934432628117	1	0.262141442752742	NA	0.262767095719484	1	0.446454769354575	0.952381	0.741763225082537	1	0.541254832802598	0.916667	0.561725161416142
3110045C21Rik	chr1	+	NA	0.532531599527493	NA	0.40999508647053	0.6	0.692345550120332	1	0.53825761427052	0.5	0.638955331608336	0.72093	0.725579110870819	0.368421	0.819689832671515	NA	0.627572682943279	0.75	0.803560754197372	0.711538	1.01650808028074
3830432H09Rik	chr1	-	NA	0.211577269786892	NA	0.236837769997272	NA	0.131899322898211	NA	0.089832489391499	NA	0.204177731624537	0.0909091	0.208199289808717	NA	0.15815416527491	NA	0.115763854240309	0	0.30972830591548	NA	0.223223799292377
4631405K08Rik	chr1	-	0.4	0.278847220857867	0.5625	0.214535282799167	0.636364	0.201283862547791	0.2	0.177099487533929	0.32	0.202905172130703	0.479167	0.312906839836412	0.541667	0.349366560245068	0.7	0.281050739875561	0.611111	0.335157703759108	0.677419	0.434791764973977
4732440D04Rik	chr1	-	0.5	0.336913804606301	0.397727	0.372250270618084	0.6	0.156636520892017	NA	0.172270687947521	NA	0.257090664217759	0.425	0.279088565315007	0.5	0.254141757194707	0.1	0.246829949714484	0.443038	0.333542806371232	0.438596	0.340518282686949
4833412K13Rik	chr1	-	NA	0.199095784466469	NA	0.190436670088488	NA	0.296141774782957	0.6	0.497363374862019	NA	0.349182209156952	0.807692	0.522445547155793	0.4	0.401283189049454	NA	0.344004151038647	NA	0.340544073471573	NA	0.238799658715618
4930535G08Rik	chr1	+	NA	0.218795788403151	NA	0.259325065529193	NA	0.242487853234045	NA	0.264024083062346	0.6	0.439523819015431	0.771429	0.406682612759693	NA	0.188711553769203	NA	0.39904481520483	0.693878	0.896827419434328	0.627737	1.16343193726249
4930558J18Rik	chr1	-	0.650224	1.67668799836235	0.726351	1.64711014655482	0.67474	1.77035631153145	0.734637	2.04151175337357	0.693103	1.40296345738356	0.652308	1.63505436416543	0.585987	1.63375280346486	0.702857	1.77693567199519	0.784861	1.83756279505894	0.648562	1.8072316276921
4930590L20Rik	chr1	-	NA	0.0280253797683361	NA	0.155011466736859	NA	0.25624564056717	0.636364	0.293094848085084	NA	0.0993498686743741	0.75	0.294164638524191	0.733333	0.638138527212313	0.615385	0.582692022202351	0.95	0.86155436993578	0.7	0.80898242429989
4931428L18Rik	chr1	-	NA	0.0408919129601316	NA	0.0403888716101975	NA	0.0679797741586208	NA	0.115138030945541	NA	0.0652327567799947	NA	0.0536520597308303	NA	0.0740655504569101	NA	0.0447477695150535	NA	0.125709648172688	1	0.108720002932401
5033404E19Rik	chr1	+	1	0.451116512083179	NA	0.241468566494319	NA	0.411261675966191	0.545455	0.386326318721899	0.844444	0.536507948093953	0.846154	0.525059711309463	0.970588	0.707889819068512	0.8125	0.828064827795939	0.729114	2.0067340563969	0.788168	2.19980451808574
5730419F03Rik	chr1	-	0.170732	1.28903350481302	0.255376	1.32878615343791	0.242424	0.658887137058927	0.355263	0.655572863987927	0.159533	0.840389711310575	0.21875	0.845635451962078	0.122363	1.38015620108451	0.22973	1.40247466720531	0.2	0.585626345147552	NA	0.461458652162409
5730559C18Rik	chr1	-	0.582609	1.95243479052741	0.616438	2.00038607074709	0.572202	2.68669671624972	0.571146	2.29215201707566	0.604027	2.52127888946967	0.511527	2.41460140788606	0.610272	1.90152389421851	0.652047	2.04112585555093	0.643969	2.64483516104095	0.662	2.37963835919792
6030442K20Rik	chr1	-	NA	0.244118463283594	NA	0.198403515481381	0.6	0.202914424890663	NA	0.173943259043225	NA	0.138463849374798	0.478261	0.251660032648325	NA	0.137159837685537	NA	0.228974860209792	NA	0.110272755539935	NA	0.137755806724428
9230116N13Rik	chr1	-	NA	0.185682782254462	NA	0.136482651125237	0.47619	0.204592792024058	0.625	0.208433612522517	0.796296	0.205127444093298	0.59322	0.195466009197679	NA	0.241344673112466	0.583333	0.146486916698903	0.8	0.166885650036042	0.357143	0.144331072634695
9330185C12Rik	chr1	-	1	0.522233092571115	1	0.534013734764443	0.948276	0.676664877861356	0.925926	0.654899512276109	0.955224	0.598954659213298	1	0.594506297146232	1	0.858459892765749	1	1.12614480802354	1	0.499172135445448	0.875	0.560055017229573
9430016H08Rik	chr1	+	0.55414	3.87745963549567	0.527094	3.92963316132923	0.557798	3.6661359316143	0.475265	3.90429960352026	0.471591	3.32376637697948	0.542403	3.12703722618919	0.475862	3.13968308612965	0.516605	3.2183688685043	0.573171	2.03721847093649	0.468864	1.98305868910895
9430037O13Rik	chr1	-	0	0.553501250424638	0.0952381	0.5952870910103	0.272727	0.690116100163856	0.3125	0.680286920368424	0.327586	0.63225152536942	0.227273	0.615268833788227	NA	0.509221653028007	0.636364	0.572043410685496	NA	0.324108548690127	NA	0.408778582454166
A130010J15Rik	chr1	+	0.76711	2.59415212440673	0.784091	2.53373160335795	0.746827	2.96380544553677	0.767956	3.23942032414547	0.705352	2.77759488169529	0.733828	2.69474567959665	0.726376	2.98732575464761	0.74188	3.17772174270256	0.69186	2.70829019382402	0.705206	2.72194730679633
A430105J06Rik	chr1	+	NA	0.194485145247245	NA	0.163278744962825	NA	0.181865889925534	NA	0.156458715888798	0.73913	0.258543422950254	NA	0.239225066329231	NA	0.339680796784565	NA	0.332537346004025	NA	0.266912922450693	NA	0.230839670091764
A630001G21Rik	chr1	-	NA	0.16590735154847	NA	0.0949295028853635	NA	0.104617083228974	NA	0.110456734639101	1	0.206863369968503	1	0.225184170963285	NA	0.266453190537911	NA	0.306759257166504	0.949045	0.728616117210363	0.977901	0.721405923586887
A630095N17Rik	chr1	-	NA	0.220809047364415	NA	0.294425163445878	0.478261	0.470319550601429	0.428571	0.421884727560789	NA	0.293537724186619	0.583333	0.353085972787802	NA	0.242821188955029	NA	0.211426237797751	NA	0.0484864079963859	NA	0.0629002128656099
A830018L16Rik	chr1	+	0.65	0.28353151279511	0.670455	0.256039848357256	NA	0.136074291483904	1	0.126266553934677	NA	0.0753838631111079	NA	0.0808227995520462	NA	0.158955011260458	NA	0.156980223775177	0.652174	0.284614106134943	0.843137	0.247430564381274
AA986860	chr1	+	0.378601	1.27305287597667	0.398034	1.28851152446625	NA	0.102632650793599	NA	0.113032288307369	NA	0.0603741509636581	NA	0.0670355955098396	NA	0.0572874359656508	NA	0.0652284794084819	NA	0.231862269447552	NA	0.232869029828835
Aamp	chr1	-	0.490417	53.1585289982723	0.475717	55.4359197581275	0.50045	53.6185750588846	0.495473	50.7870115820606	0.482242	53.4914977538011	0.500997	51.7526557966753	0.489666	53.8269965137986	0.474131	53.374551985151	0.498857	53.6826106698857	0.469972	51.0405335554662
Abcb6	chr1	-	0.516304	0.102056674584411	0.444994	0.112897344823778	0.472954	0.0848308282421547	0.49729	0.131363503227424	0.484816	0.0516843625370921	0.470175	0.0765160136895002	0.453978	0.117700621024442	0.452459	0.0797714235475319	0.413174	0.110129828585958	0.430894	0.0886007388498964
Abi2	chr1	+	0.51068	7.33086263409188	0.528596	6.73144960504589	0.580952	8.22269200026674	0.495362	7.78307366476627	0.495833	8.09154964715579	0.520055	7.94990007384629	0.527407	9.76924127498522	0.528736	9.7273888290303	0.510949	8.95659538708446	0.535714	9.62717344004616
Abl2	chr1	+	0.49667	12.2864977566482	0.490702	11.1131595790323	0.525009	13.6336269565704	0.53475	12.9353465694781	0.525908	15.8543973882349	0.542005	15.6346871127615	0.572562	19.3228399755253	0.558686	20.0497850484027	0.580576	27.7670996075025	0.575307	25.7639514568112
Acadl	chr1	-	0.393502	11.0148129136873	0.403702	10.969399973313	0.385965	13.0363677082324	0.391155	13.8109688337282	0.411765	15.021630772086	0.39956	14.9083152308416	0.398993	13.8884173936078	0.419761	14.0158271814275	0.480614	40.0365389966476	0.494627	37.5614712460987
Acbd3	chr1	+	0.478261	7.81530703623177	0.467583	7.56609140098755	0.493119	7.353095438914	0.441423	7.50642708129648	0.462598	6.97047177575726	0.388476	6.65807817349941	0.491713	6.68826590161808	0.414169	6.51611343707445	0.519451	7.30219428416101	0.502137	7.08800356918049
Acbd6	chr1	+	0.496078	4.52476336004967	0.552788	5.08965125511735	0.544529	4.60547958119577	0.535565	5.32678373067182	0.53354	5.42508479537875	0.548624	5.44984951780482	0.550864	4.27050181263237	0.567452	3.90804814952848	0.564935	4.42782603989217	0.532526	4.11583590300295
Ackr3	chr1	+	0.753534	5.23081826864861	0.726496	5.00370347466722	0.792802	2.18550506909716	0.777394	2.34981609170466	0.737942	2.24159773288187	0.745327	2.18646565999835	0.626531	2.59675665536057	0.737327	2.52263545812731	0.671569	1.50437480485202	0.677541	1.62456520510817
Acsl3	chr1	+	0.513211	34.5495556737402	0.497858	34.9192413487171	0.48255	21.9768530687021	0.479263	22.9983337443739	0.477864	22.2409947205479	0.479404	22.8916481017477	0.47205	21.5370255018903	0.473164	21.2372071952481	0.439969	29.4121255105559	0.452163	30.8249636852764
Actr1b	chr1	-	0.55162	27.5947698737674	0.565859	28.4744531020219	0.566502	26.7499377461735	0.551839	25.186480829645	0.556229	26.7555240085025	0.554675	26.0932474225613	0.577972	22.9648361695529	0.555556	23.4907991355955	0.579916	19.1289259766453	0.559817	17.3920462154725
Actr3	chr1	-	0.595995	54.3284604584366	0.62946	53.1246488820421	0.584196	57.7040977024937	0.608841	59.7840755561565	0.631134	52.6365601438044	0.605224	51.4917620366327	0.598571	47.6399892887146	0.613703	47.0988778136139	0.612311	46.2991616319507	0.596539	45.3575277656317
Adam23	chr1	+	0.289037	0.482934245637714	0.201511	0.450664654592485	0.485817	2.84807616892328	0.485065	2.89153904560673	0.571835	4.71076165547197	0.570203	5.69303422982834	0.569106	3.58575136693696	0.572492	4.11317888973416	0.539927	2.7472937057339	0.554089	2.60610214242651
Adck3	chr1	-	0.52521	0.491908158321839	0.566038	0.379431052908133	0.5	0.800724165842866	0.459215	0.770257298813728	0.540816	0.984008550034547	0.477449	1.00844687180634	0.540107	0.712169523245763	0.435345	0.791417522692746	0.500449	2.48179094623292	0.501634	2.46221712721911
Adhfe1	chr1	+	NA	0.200900453857832	NA	0.152263908993111	NA	0.218110767459194	0.6	0.191304927909666	0.630769	0.395338884828695	0.479592	0.521801765048813	NA	0.21217568876167	NA	0.25573705418881	0.484848	1.17759439357413	0.5	1.3112059673387
Adipor1	chr1	+	0.568849	20.691804357168	0.583019	20.5195079490595	0.57412	23.8493137293641	0.580995	23.0325619525439	0.532882	24.2875177005194	0.523993	23.781828011828	0.525535	25.4062083180442	0.53647	24.8231683926049	0.491093	25.2069376942465	0.511902	23.215304445354
Adss	chr1	-	0.551696	68.443098783473	0.554088	67.3808605826782	0.588849	73.6993021932655	0.592242	79.5809660647539	0.583711	60.0137715138759	0.56238	57.5266063966026	0.580254	63.0042947266812	0.56372	60.6323981160625	0.482264	52.3201756275479	0.512605	54.808195110726
Aff3	chr1	-	0.8	0.508827414891049	NA	0.47092478882347	0.652174	1.26491564267759	0.68	1.16737607785246	0.614286	1.20252754860583	0.666667	1.17139922659921	0.562044	1.45556586046788	0.584	1.40232803276116	0.570225	4.07404297911174	0.615804	3.88490638580791
Agap1	chr1	+	0.62	1.6474813107264	0.612348	1.58147367609537	0.469598	1.91953066744299	0.451874	1.75786828443775	0.513573	2.00212421421678	0.508963	2.11326430667246	0.515065	1.6656611412029	0.474006	1.69797920466043	0.573152	2.39694496664805	0.588274	2.23945797752943
Agfg1	chr1	+	0.574861	18.1913361822529	0.593829	17.5888834104456	0.565292	15.9966892594279	0.576445	16.1513380726458	0.574546	15.3773048917821	0.565947	15.7805368554446	0.557743	14.1942195229205	0.557329	14.2892693727092	0.55868	14.2051859595153	0.549835	14.7553466029982
Ahctf1	chr1	-	0.522442	22.4945017306737	0.535701	22.1562106178303	0.523187	21.8040650893262	0.523292	22.3176659521031	0.503451	21.7762884464231	0.507058	21.6605035414679	0.516717	22.6472590861404	0.531488	22.9259377176871	0.503703	19.0851391797019	0.500264	20.2901289591666
AI597479	chr1	+	0.577855	10.196075665717	0.542903	10.075072934194	0.556667	9.12704154062859	0.517222	10.0124613916926	0.552776	10.0507073420027	0.538707	9.60549519871254	0.563265	10.1633013927725	0.506282	10.4708874839931	0.532982	14.0180227759378	0.536872	14.1185360628681
Aida	chr1	+	0.547368	6.75890012745253	0.5623	6.87158928699825	0.524372	6.2022158857803	0.548469	6.38230416172798	0.554967	6.04834599527713	0.630152	6.15786628227228	0.523913	5.47324627081706	0.575203	5.50116396863954	0.555896	5.29732459677729	0.566234	5.35734949325518
Aim2	chr1	+	0.444444	5.33865473417286	0.453846	5.4251356777494	0.360825	4.11007733956484	0.378378	4.36248494856498	0.505263	3.16366759188485	0.552239	3.22929923870879	0.354839	3.58746000031685	0.534884	3.35215881610227	0.514706	3.16109982964098	0.434211	3.26182190215355
Akr1cl	chr1	-	NA	0.169377431823933	1	0.139653951500635	NA	0.107121846544797	NA	0.106638379949154	NA	0.0626548565952147	NA	0.0265710901660527	NA	0.0457319517330926	NA	0.0362638730852572	NA	0.0032341551544275	NA	0.00279705943803278
Akt3	chr1	-	0.39313	11.5083802156564	0.380503	11.0532825091551	0.448819	9.01234348101532	0.39916	9.23819206297466	0.50295	9.95989216383361	0.416422	10.2691442880585	0.502874	7.39214986978458	0.536842	7.1753946966977	0.447368	11.1524580127591	0.501351	11.8437437962142
Aldh9a1	chr1	+	0.341134	36.7958076309487	0.3653	37.0779822196472	0.322661	41.4872041611954	0.330924	40.2411915544076	0.30719	56.4800449960045	0.312484	54.26141422832	0.335507	50.8809970727969	0.316241	52.4924404523841	0.445028	90.2983853173266	0.447629	79.8902458235674
Als2	chr1	-	0.493019	7.97097756929971	0.464066	7.49636171389719	0.507514	7.93740104308089	0.502934	7.42343759237415	0.467174	8.32207062541854	0.471383	7.92615675616052	0.461813	9.17395304593997	0.47688	9.45126046627194	0.476464	10.2366558698652	0.469306	9.70737209959396
Alyref2	chr1	+	0.566038	1.0470000086587	0.44898	1.13512717432915	0.33871	1.3458980659912	0.321739	1.46910493979441	0.505618	1.33790636188908	0.359375	1.60532610299879	0.466667	1.57506697470368	0.465517	1.59868700514111	0.5	2.59846963702391	0.473988	2.53397765110944
Amer3	chr1	+	NA	0	NA	0	NA	0	NA	0.00283875316994275	NA	0.00750552969630176	NA	0.00694471674794558	NA	0.0109566134360534	NA	0.00772286186074922	NA	0.176665725310602	0.76	0.206399677698169
Angel2	chr1	+	0.491188	9.92777526125918	0.498988	9.63987841280792	0.482524	8.63445853545539	0.493555	8.96901383083862	0.466994	7.26016813835077	0.462316	7.24076481343599	0.455454	7.2599123743626	0.469595	7.20599276386704	0.40505	5.39213078198555	0.404719	5.35378611001817
Ankmy1	chr1	-	NA	0.248274128348205	NA	0.199948555522868	NA	0.230180436776772	0.56	0.226617508139533	0	0.38590353795255	0	0.39152284808196	0	0.222372671955391	NA	0.276909564463611	NA	0.230650261082623	NA	0.272015322890018
Ankrd23	chr1	-	0.419355	0.109181559223547	0.411765	0.145298104527542	0.25	0.0812001640533915	0.364583	0.0924568329431855	0.328358	0.0611128780611	0.457516	0.0904744411033801	NA	0.0594752764938162	0.282609	0.13834145428866	0.443709	0.191797272417294	0.481707	0.235718372796707
Ankrd39	chr1	-	0.559917	0.885792289033671	0.681193	0.815692054229842	0.533762	0.680922460668763	0.612069	0.728672683044626	0.601134	0.78149110493182	0.509191	0.764605256047984	0.414286	0.647961029057125	0.632959	0.801690808372403	0.582988	1.22261488629219	0.545861	1.14085587704785
Ankrd44	chr1	-	NA	0.123546945773796	NA	0.103669044420841	NA	0.141771998848476	NA	0.124897929945621	0.727273	0.140306545399988	NA	0.157795722763902	0.454545	0.262532052227773	NA	0.23569684058571	0.560976	0.193024646775453	0.565217	0.185209140596376
Ankzf1	chr1	+	0.514308	4.72596633579216	0.480574	4.70117039901717	0.510686	4.84020751386801	0.491921	4.98275711017279	0.499543	5.45558299273821	0.51608	5.69450566291286	0.548018	4.41097659422802	0.580269	4.39651621808472	0.489254	6.47271623200878	0.490798	6.36263625095987
Ano7	chr1	+	NA	0.0894715876690429	NA	0.101434461290912	NA	0.100237746810948	NA	0.0844956591125731	0.2	0.170999477779598	0.7	0.158222402052592	NA	0.241573525156359	0.5	0.242642084546612	0.461538	0.338263891931111	0.480519	0.469849117664186
Aox1	chr1	+	NA	0.148024960412757	0.4	0.129645953998101	NA	0.149723692463627	NA	0.124821512226445	NA	0.169436685121023	0.7	0.181345814090197	NA	0.136593288056189	NA	0.161982806172041	0.755102	0.283529710833411	0.521739	0.281789093248957
Aox3	chr1	+	0.959223	1.33318799689938	0.974633	1.42778939502542	0.978456	1.09717306336302	0.958333	1.06010902112731	0.89726	0.812428500952738	0.910638	0.756060736788425	0.89011	0.588432301174267	0.931937	0.687250152732618	NA	0.195488193309188	NA	0.179111627995273
Aox4	chr1	+	0.507812	0.290956455784054	0.611765	0.240087270545979	0.604167	0.237254742927054	0.666667	0.222216087019758	0.57483	0.45827251804425	0.58209	0.451815878006551	0.633028	0.438368687759971	0.605442	0.388921708260173	0.623529	0.375251152380774	0.706122	0.409866586285793
Ap1s3	chr1	-	0.287234	4.36185141057359	0.180428	4.07629528338394	0.362262	20.1289457651684	0.429262	21.1580105479311	0.423963	18.7041972668224	0.440339	18.119137602888	0.46783	16.0850699288128	0.429435	17.0124396155645	0.544702	10.0415089828019	0.468303	10.954697867197
Apol7d	chr1	+	NA	0.348353728148648	0.56	0.503657534677294	0.392857	0.277234588301118	NA	0.316017985598562	0.8	0.204942957216664	0.862069	0.345223164824704	NA	0.122739221963709	NA	0.19465600741699	0.9	0.221342423495696	NA	0.236469905947661
Arfgef1	chr1	-	0.588428	8.85680247896303	0.638544	8.57256690453568	0.658999	7.1331102546005	0.617426	6.94222480287089	0.616627	5.59792883116049	0.636802	6.03933381689216	0.621212	4.39915677208575	0.64219	4.28405529983221	0.613344	5.6239906427241	0.609652	6.01643481554595
Arhgap30	chr1	+	0.652174	0.261577822922131	0.569444	0.253727301275022	0.521739	0.350881984113109	0.43125	0.336693110230957	0.48449	0.860783174826519	0.486128	0.934929763939465	0.627119	0.63108869046551	0.553279	0.615915987616814	0.537768	1.46409085759125	0.509356	1.37721886748381
Arhgef4	chr1	+	0.513333	0.58678890014686	0.412639	0.567402604475459	0.453782	0.408251925795081	0.263158	0.399032318821347	0.357143	0.701049915279293	0.381215	0.69758339601077	0.395161	0.850593495417194	0.441176	0.773381489984887	0.53913	2.20397880991918	0.539251	2.17700568694009
Arid5a	chr1	+	0.857143	0.168080762489396	0.926829	0.154294507799799	NA	0.161283911553445	0.8	0.128257313077203	0.869565	0.177877462639818	0.756098	0.170261859408963	1	0.165009743786229	0.833333	0.187987021197969	0.805556	0.159573060575187	0.66129	0.180253751956823
Arl4c	chr1	-	0.607595	1.66211628222927	0.588235	1.58536763931949	0.610714	2.28229218655791	0.568562	2.27471586493688	0.57265	4.17355556475869	0.54886	3.98574137505289	0.53858	7.4565460170586	0.579901	7.43286361679099	0.529905	23.323776513713	0.543842	23.1040582987438
Arl8a	chr1	+	0.483299	15.2283867298213	0.501121	14.8346445646412	0.530048	11.1563266208307	0.489562	10.54258844068	0.496827	12.4840823756884	0.470899	13.0018147185026	0.502678	10.7448205256149	0.523342	10.7407103805458	0.491569	21.7125941791915	0.489064	21.3590454378383
Armc9	chr1	+	0.563183	1.06410466443316	0.48481	1.03288933890639	0.475628	0.802287823656581	0.537696	0.822495445595063	0.513298	0.92003967189721	0.490241	0.970115951166345	0.514725	1.15561523142766	0.474667	1.2231217559696	0.520516	1.39830684946182	0.500574	1.26544723959731
Arpc2	chr1	+	0.429844	83.6497482466638	0.459159	83.890177610573	0.502283	76.9571670836927	0.483899	81.1541806714058	0.490575	71.9658097662379	0.489466	70.1942591329938	0.479184	66.3159133308228	0.504613	65.952313395425	0.513333	52.4615839239843	0.502658	54.202471674867
Arpc5	chr1	+	0.517696	54.9376741985621	0.531054	54.8644561418913	0.532489	50.6004282932092	0.522902	53.0046005066045	0.510655	40.5149812080129	0.534559	39.855253416542	0.53564	37.7825238924952	0.538049	37.4805823244344	0.545455	28.397377128994	0.571062	28.9820422881072
Asb1	chr1	+	0.518654	5.4238303500877	0.540076	5.26238865528509	0.519074	7.94119915424868	0.573443	7.5113091105808	0.576596	6.45243106507028	0.543726	6.17105457172669	0.61059	5.90794496653226	0.586772	5.62676764847669	0.571868	6.42109828085906	0.555722	6.54350790570288
Asnsd1	chr1	-	0.581885	1.44964613206453	0.587544	1.49602761647487	0.617207	1.34736952889134	0.598515	1.24041926778866	0.627022	1.15237962752062	0.612802	1.33716505329151	0.585472	1.38217305821888	0.605514	1.21619313364227	0.591356	1.48163907972629	0.59343	1.47493986485503
Aspm	chr1	+	0.446921	12.8851652609638	0.461833	12.8745783479639	0.481305	14.9184165832142	0.462171	14.8000040003643	0.470233	13.8465172060405	0.493875	14.5488160755382	0.474092	11.6061676136519	0.486772	11.1809155221445	0.49885	9.23868761413758	0.494778	10.5742095986556
Atf3	chr1	-	0.413934	2.43191078645254	0.471503	2.68909632198525	0.398104	1.5669117025076	0.417671	1.78855683009195	0.48564	2.43329690889462	0.451327	2.63380800742698	0.525641	0.930854344845766	0.428571	0.834585372561634	0.40566	1.03642510834614	0.377551	0.874490115110862
Atf6	chr1	-	0.530807	6.29088259013664	0.518422	5.70971496847579	0.526025	7.00697232440228	0.539587	6.7734846355518	0.550034	8.18006630991778	0.515299	8.12616270431432	0.530765	7.22351684179168	0.533521	7.07881985720171	0.509521	7.99559041727987	0.51373	7.90338914673295
Atg16l1	chr1	+	0.520404	9.14139393773603	0.509643	8.76724440975868	0.476341	8.87221133397194	0.492058	8.73704539513457	0.481944	8.40769623672279	0.496975	8.53450580682344	0.515194	8.78328016982293	0.474101	8.7826746537162	0.493541	6.29446539969616	0.489333	6.38896978476349
Atg4b	chr1	+	0.485315	6.72492652364199	0.470238	6.94546123097787	0.493416	5.57117160992389	0.463158	5.24135753200196	0.496124	5.62944103782448	0.477105	5.79834686771718	0.495868	4.46064142619231	0.46347	4.40477409873657	0.428278	7.14667571992102	0.469248	7.06682270536178
Atg9a	chr1	-	0.567757	0.989808553345274	0.54326	1.03501495310087	0.551387	1.10220555902602	0.547325	1.04727821909685	0.571631	1.14800997504031	0.521059	1.2210359598651	0.606667	0.971559917140472	0.530516	1.05076491820467	0.560166	1.35842093906049	0.483871	1.34032835865846
Atic	chr1	+	0.46641	48.3166040808999	0.45864	48.4361233765896	0.460135	48.3553159144993	0.471969	47.7929881353027	0.461743	44.3817226389658	0.46012	43.3128442023998	0.483953	46.6570114673385	0.478936	46.216236080329	0.474325	32.1075688232002	0.467847	31.3819087380167
Atp1a2	chr1	-	0.160877	5.69009981112864	0.169672	6.04639427478493	0.234904	5.46732501215347	0.242697	5.40838382708899	0.3016	9.88585117222829	0.291049	10.7940199010388	0.330024	7.09035801661823	0.295198	7.05798468438978	0.0883949	18.153947029871	0.0848645	16.3879438252827
Atp1a4	chr1	-	0.00596421	2.03287560423208	0.00152439	2.09719904220045	0.122788	2.96497112609258	0.119154	2.80840088352685	0.215647	2.96351961416868	0.174033	3.03320683364538	0.165736	4.26929656413773	0.129061	4.89773916562078	0.0212766	1.6036611691938	0.0263692	1.34840079993608
Atp1b1	chr1	-	0.469405	62.5555220408511	0.492593	61.2335040140527	0.521677	42.8276659074747	0.53219	43.076849319645	0.527843	42.3082689466087	0.531938	42.9881077281769	0.542125	41.3376915413291	0.546172	40.2049631729579	0.490217	73.2718854923845	0.491622	71.8520503007733
Atp2b4	chr1	-	0.591083	7.540234375886	0.609424	6.99280418600996	0.663696	6.59779840502832	0.635468	6.33671451803305	0.623362	6.26737712206442	0.654537	6.73128124360784	0.605988	4.15025209675386	0.622086	4.36724054981478	0.581315	2.52512525720172	0.621951	2.26363476293039
Atp6v1h	chr1	+	0.591687	7.65678622842701	0.659363	7.88708712906567	0.566079	7.14824135380065	0.599265	7.38652779067018	0.600897	7.67001985625379	0.581081	7.66441913591593	0.598291	9.31388139095968	0.6469	8.69373954570507	0.693314	10.2478294390578	0.722892	10.2109249225908
B230369F24Rik	chr1	-	NA	0.12107839853039	NA	0.0908875826453226	NA	0.130834510656064	NA	0.11201542586521	NA	0.163104542212758	0.7	0.0913447274753218	NA	0.156645332718577	NA	0.145744883678327	NA	0.164839582185369	NA	0.211542916420031
B3gnt7	chr1	+	0.353584	9.57903686860101	0.384208	9.63510360503981	0.342708	27.2527743198379	0.332329	24.6975231191623	0.335561	28.7677210766022	0.317381	26.5149789041838	0.366517	26.8039285841316	0.376337	27.5933654033376	0.392492	23.1087749995001	0.383921	20.8962631306926
B4galt3	chr1	+	0.357143	4.88441820477158	0.4	5.29976464123895	0.5	3.78901131562434	0.65	3.86782430078124	0.25	4.77350041229947	0.290323	4.53584640808895	0.714286	5.87984746095592	0.470588	5.72345007723592	0.826087	5.38576279756782	0.666667	5.03042160893588
Bag2	chr1	-	0.362712	1.87962438359305	0.437824	1.86150579620089	0.233333	2.92680817460796	0.263158	2.72669526776004	0.229358	2.93111667470245	0.262391	2.7951951400041	0.321513	2.87354827543951	0.205	2.73324174258882	0.456731	2.04700136014817	0.441441	2.33224283878917
Bard1	chr1	-	0.468337	11.6639213846331	0.464867	10.9669996395776	0.466774	10.3508065510351	0.430377	10.2447938220722	0.45298	11.2910010937212	0.435589	11.1713751817449	0.41966	11.729195053409	0.450131	11.4691008271828	0.441913	14.9981102041851	0.451984	14.3379214207271
Batf3	chr1	+	NA	0.126158080873242	NA	0.0843487567904388	NA	0.0564653540522295	NA	0.0546491092402755	NA	0.103206908034306	NA	0.0891289383004964	0.666667	0.220970948997125	0.4375	0.254868948972403	0.382979	0.392096253017736	0.579545	0.479169384066499
BC003331	chr1	-	0.489362	5.99887355216322	0.512397	6.36189744092959	0.441734	5.59902974532939	0.492997	5.89027712138211	0.488	4.94196294063692	0.472772	4.9992204105094	0.546125	5.53983478333201	0.513986	5.41873660647047	0.470769	5.67743316266461	0.534989	6.93735141220167
BC026585	chr1	+	0.484076	1.516776907241	0.637056	1.49811792438267	0.55291	1.48444862797677	0.525346	1.46130140684665	0.524194	1.63043563486387	0.564145	1.74533283889569	0.515663	1.67114730330738	0.584352	1.73341981190496	0.495767	4.32980370570567	0.538399	4.41364720439857
BC034090	chr1	-	0.457565	0.618262647032337	0.609337	0.571932358906515	0.43949	0.565612060362949	0.663043	0.503443310901606	0.65	0.375535736874654	0.577259	0.429089232022664	0.3	0.234110660234234	NA	0.282587987901985	0.497717	0.445363461822069	0.482558	0.346512187822009
BC055324	chr1	-	0.476654	20.2356214137887	0.504088	20.4000023088197	0.536315	22.0593138002231	0.539669	22.7564473231446	0.55255	23.0331461327096	0.522438	23.1969879891378	0.516832	25.9401045631929	0.551748	26.0237730407658	0.520011	26.2668569421559	0.565541	26.582512500977
BC085271	chr1	-	NA	4.80470352419719	0.818182	4.71883259231837	1	4.59149200916011	1	5.57571594377162	1	4.88441903781439	1	4.88183230515167	NA	5.55537879371005	NA	4.83576837255618	0.846154	4.02792601196607	1	4.15651120827639
Bcs1l	chr1	+	0.470085	7.11976334715925	0.481032	7.86598333397552	0.508562	7.61058691969021	0.507547	6.7116827684391	0.47561	7.17334152613004	0.459302	6.68837052462908	0.491228	6.65182399725249	0.517413	6.20503764883971	0.489051	5.86855305543391	0.443956	5.65546660717975
Bend6	chr1	-	NA	0.235573756392363	NA	0.243414673870333	NA	0.124265278486096	NA	0.134846169286284	NA	0.125266215591945	NA	0.139681984797615	NA	0.126598367699597	NA	0.178467865321073	0.527094	0.60482577457988	0.42953	0.660737225822437
Bivm	chr1	+	0.586104	6.70623483633846	0.614343	6.56841741505231	0.643777	5.15164175833206	0.620424	5.47504371009313	0.643469	4.4281554519208	0.597724	4.30033504576495	0.609492	4.31331079923973	0.627163	4.3104145427469	0.57478	4.12325254952718	0.601329	4.54006637882333
Blzf1	chr1	-	0.525612	7.09842533153276	0.553963	7.3094471894668	0.498969	6.68008932737317	0.541401	6.76429766778765	0.551923	5.89559920277914	0.554484	5.91046413409187	0.512162	6.18652775503123	0.554264	6.37566823843474	0.52	5.1914463374335	0.56215	5.30615437314568
Bmpr2	chr1	+	0.49326	2.91379949814823	0.5156	2.77223393236805	0.456512	2.66769675049716	0.498734	2.66855237153276	0.500761	2.762452296292	0.462264	3.06204892218554	0.478816	2.60012262888084	0.493813	2.74907771471325	0.515998	2.31707964392482	0.495229	2.40785428663032
Bok	chr1	+	0.682415	4.9779014630581	0.673624	5.39751612084991	0.61326	3.57060069215212	0.676375	3.5438377453311	0.682258	6.28232415223143	0.671512	6.24390424481594	0.661591	8.02895868849024	0.61082	7.83450758112744	0.661485	6.78408513274541	0.660061	6.87174570087299
Boll	chr1	-	0.55	0.493961275279358	0.470588	0.491369586790517	0.526316	0.432582734764064	0.585366	0.443504692742906	0.689655	0.587866234881197	0.701754	0.711752438381364	0.6	0.561462519822713	0.772727	0.511581358138236	0.737864	1.22799693149128	0.696721	1.20274431408939
Bpnt1	chr1	+	0.396855	42.001523962846	0.376629	42.0462609929679	0.422452	30.8192899855764	0.426155	30.5662289710171	0.32988	35.7659351620378	0.334111	36.4855225168081	0.317063	39.3888461622245	0.293135	38.9624148279369	0.341403	32.1395947756768	0.319574	30.0953522163163
Brinp2	chr1	-	NA	0.0406586979894453	NA	0.0460950032831062	NA	0.0734696429967985	NA	0.0767949597135831	NA	0.124081379270354	0.9	0.1310457831694	0.8	0.139052884378813	0.6	0.148953365775956	0.769231	0.19564074822267	0.78	0.212171331310532
Brox	chr1	-	0.567805	9.3668762506991	0.573356	9.36652920205908	0.558772	8.97894767925764	0.587916	9.58104692638643	0.579247	8.63256363096176	0.578054	8.40355638442061	0.558376	9.98928224742367	0.615774	9.6340250744711	0.579646	9.49890347729914	0.579685	9.24671840166981
Btg2	chr1	-	0.557065	12.0176159206306	0.524476	12.1253665143739	0.526863	9.29883013563839	0.546632	9.70425132129041	0.54197	10.4072446391003	0.526216	10.4784154782323	0.551326	9.04652780272742	0.552296	8.47661092597428	0.534026	17.3891384956721	0.535596	16.0003954776547
Bzw1	chr1	+	0.532402	215.089515419167	0.529888	209.710758508384	0.533886	199.620887516774	0.530861	203.370811067278	0.531001	159.93904505122	0.53031	154.018560789446	0.531638	199.760280680622	0.515709	197.19250237404	0.521668	104.272944849177	0.527849	112.821185935583
C130036L24Rik	chr1	+	NA	0.255210767634041	0.272727	0.256827294197391	0.916667	0.20613068539926	0.769231	0.228553808115869	0.622222	0.300435731500372	0.803279	0.33958661543939	0.657895	0.336409053829673	0.903846	0.324065056933859	0.652174	0.450438880935509	0.767123	0.41333820684755
C130074G19Rik	chr1	-	0.562109	9.88095477693802	0.542367	10.192144393149	0.406714	4.55863182078583	0.401026	4.70777703296781	0.412151	3.96078301485075	0.42998	4.32812138126461	0.399399	1.66482762839223	0.5	1.80490533796517	0.501645	2.38612237625443	0.521538	2.40111286495121
Cab39	chr1	+	0.494712	20.267671899822	0.496864	20.2662215028042	0.504077	18.4395017333593	0.506948	19.3667611302554	0.489504	18.1690961216567	0.489984	18.5167874659449	0.540193	18.3750442482109	0.53635	17.6423819422585	0.556495	16.7036120879826	0.560119	17.6351135332461
Cacna1s	chr1	+	NA	0.0307594588022241	NA	0.0430008908489883	NA	0.0059002292533093	NA	0.0228417781784218	NA	0.0503271548490952	NA	0.0357011453949349	NA	0.0514274997676377	NA	0.0595521079179727	0.5	0.322129259843164	0.603448	0.2965673013469
Cacybp	chr1	-	0.493517	241.516449379848	0.468374	245.661069892552	0.494042	242.820766735478	0.482106	272.246757783102	0.470657	245.954034998625	0.47246	250.445873023028	0.493723	238.338744470048	0.465283	228.625547404221	0.468725	152.375226832842	0.479061	164.100347799702
Cadm3	chr1	-	NA	0.0470414970007694	NA	0.0354806875436603	NA	0.110195138878261	NA	0.0774077230280747	NA	0.150085741178696	NA	0.100997337605884	0.52381	0.276636349171879	NA	0.19888926530456	0.6	0.238520281279406	NA	0.180295719148659
Camsap2	chr1	-	0.499274	9.07970795095711	0.492818	8.74060687757767	0.469258	8.07394557816497	0.482802	8.28339468862118	0.478675	7.47716295698627	0.48578	7.64824261136161	0.473971	8.03332462578686	0.463201	8.18736239526974	0.496331	5.25700893624175	0.493641	6.12903801383285
Capn10	chr1	+	0.50947	4.97463387979437	0.538889	5.36779813312555	0.6	4.00752187264963	0.564815	4.07082691345361	0.476064	4.76336214349443	0.519789	4.53611128705157	0.582192	4.33676171944297	0.558473	4.56959568354956	0.634648	4.63879428109141	0.586898	4.63490576435284
Capn2	chr1	-	0.651934	0.893976487683481	0.698565	0.934124261962263	0.608955	1.31359530029613	0.636054	1.29885238655616	0.616387	2.07985857619201	0.616179	1.93727060215315	0.632027	3.19798421103759	0.591255	3.10053733484604	0.64467	1.7463550926112	0.708333	1.63465046759544
Capn8	chr1	+	0	0.456308192657765	NA	0.363804100182422	0.149701	1.031940184436	0.0872483	0.859848546371625	0.0542986	1.07549263406296	0.0204082	1.14615457840099	0.0299625	2.07632765261181	0.0305344	2.15029056256926	0.0133843	2.80555925144658	0	2.71680534800307
Carf	chr1	+	0.514768	0.528063843229881	0.464615	0.516520313631799	0.441718	0.54247224671807	0.47619	0.558426060135835	0.457413	0.46497676807293	0.438547	0.539887441889199	0.375	0.477126381567322	0.581818	0.469508832343253	0.471751	0.667676523879888	0.461089	0.754554099194643
Casp8	chr1	+	NA	0.2410686400052	0.555556	0.287840165679367	0.5	0.307248370899083	0.56	0.314604108653427	NA	0.186110154958141	0.181818	0.179232744994334	0.575	0.316041299001655	0.166667	0.31655992080715	0.05	0.367016801074613	0.363636	0.415080526725668
Casq1	chr1	-	0.75	0.579885471997929	0.196721	0.690440618115483	0.509225	2.44965865317004	0.505051	2.64565393330029	0.465154	4.9956128583635	0.523739	4.85684514469547	0.632323	4.89189483950663	0.632242	5.19821833850885	0.552752	5.12825776425639	0.538318	5.05066786120305
Catip	chr1	+	0.14433	0.497675479802886	0.238095	0.614787676081194	0.392157	0.658383036610414	0.253333	0.778180434775949	0.273973	1.1977073765572	0.315113	1.19558434325554	0.259067	1.15352177711026	0.242308	1.64148014214741	0.170543	1.3052295420791	0.142857	1.43233352961959
Ccdc115	chr1	-	0.548124	12.2619136625727	0.540246	12.7852458083848	0.601318	11.3624463375779	0.596573	11.4774396312669	0.579088	11.7658607862664	0.578187	11.1985646710568	0.609108	11.4737069941114	0.539957	11.5708089111939	0.547826	7.08730954603247	0.50924	6.93036425186627
Ccdc181	chr1	+	0.47205	2.38681104950006	0.389474	2.44404931236916	0.439024	3.02990732015366	0.478673	2.95204157827115	0.407895	4.23637415918488	0.480978	4.23938396747926	0.440678	5.52888276705684	0.46131	5.57910220943788	0.400394	6.7599297929	0.411382	7.34490958671758
Ccdc190	chr1	+	0	0.348571721720706	0.363636	0.303675866496604	NA	0.0371458108508035	NA	0.0287607933619113	NA	0.0190105458051657	NA	0.0351801568131223	NA	0.0832550972511189	NA	0.0782440814127118	NA	0.19625950180198	NA	0.142577443291972
Ccdc93	chr1	+	0.598744	8.01510434559861	0.623812	7.7412956736962	0.517889	5.26654961495075	0.493361	5.0622878835596	0.441021	4.60837555979482	0.446535	4.54208868291899	0.466614	3.45336372402113	0.454359	3.42892637407768	0.491451	4.55060296252633	0.444204	4.40773676745336
Ccl20	chr1	+	NA	0	NA	0	0.590909	0.752441856336289	0.583333	0.719465110229319	0.857143	0.579948740783908	0.65	0.507995522623825	0.805556	1.3094271077863	0.914286	1.03833089670645	NA	0.182011697293963	NA	0.198837266848923
Ccnt2	chr1	+	0.524069	14.8753517096705	0.494373	14.1286705012486	0.51015	13.7628921215991	0.500268	14.2412720218389	0.509979	13.755368770888	0.524281	14.5344972660653	0.522141	14.4045997758005	0.508186	15.0814373597442	0.536276	15.6911069429033	0.523118	16.6574242520968
Ccnyl1	chr1	+	0.330357	12.0405740760776	0.440789	11.8455044359966	0.39661	12.4162323360499	0.367925	13.2109658460032	0.388889	10.84502131555	0.380645	10.4730186734991	0.436937	11.3388014172291	0.362694	11.0167428908365	0.300546	7.01897575757056	0.341991	7.39207936604617
Cd34	chr1	+	0.22619	0.735572032114388	0.381356	0.776077985317132	0.466667	0.507158022946204	0.285714	0.560965663449033	0.446429	0.789816464897414	0.458333	0.765667882047571	0.402685	1.32680530705631	0.434783	1.31208562694922	0.320856	1.10543689363941	0.549738	1.04001346015006
Cd55	chr1	-	0.479579	7.54303702824724	0.447394	7.46916987054342	0.446979	6.15572753840779	0.457229	6.78497221492442	0.430943	4.95177515035415	0.452122	5.59995169949856	0.375405	4.50839018009507	0.446272	4.63386988684694	0.36976	5.62398122505576	0.349319	6.66148206010122
Cd55b	chr1	-	NA	0.0832730239444828	NA	0.0877318629651001	NA	0.0845993070051612	NA	0.0818781153112085	NA	0.118081026004146	NA	0.0910483461402299	NA	0.0478820360309917	NA	0.111375194691497	NA	0.422598847963724	0.3	0.477941478136262
Cdc42bpa	chr1	+	0.451285	3.74885095585441	0.41869	3.55280346929147	0.511098	2.94370868435287	0.494879	2.95561451593841	0.503056	3.04901524853656	0.494966	3.15848892866754	0.537755	2.14797274076952	0.560662	2.2710251923782	0.529543	1.3971816248663	0.523717	1.51522721837485
Cdc73	chr1	-	0.560188	6.37135548156722	0.567273	6.38968437886937	0.543901	7.02797216323783	0.555346	7.37632190094103	0.549237	7.285299018576	0.54402	7.53225451531916	0.525364	8.0129241315212	0.534113	7.78635683722459	0.549585	6.24976197002063	0.545161	6.58722281977048
Cdh20	chr1	+	NA	0.0733954798668762	NA	0.07630798773811	NA	0.118803635721129	0.846154	0.0870135866966301	1	0.145156794664867	1	0.136844847264603	NA	0.127940036453697	NA	0.122587919925213	NA	0.145897317780252	1	0.123244908608315
Cdk18	chr1	-	0.511962	4.17705225761263	0.478969	4.07168658723418	0.504529	3.44497922264834	0.496815	3.34987175076771	0.489663	4.18627063136549	0.529032	4.45395997496579	0.504348	2.21213197318244	0.458182	2.28546133141557	0.501887	4.04319291533464	0.49867	4.10467239570601
Cenpf	chr1	-	0.492239	14.4626903545155	0.501454	15.0865942038725	0.480442	19.266907495691	0.469359	19.8500881343232	0.45708	14.6121093398135	0.462146	17.5929164351513	0.487106	12.1875651368692	0.468824	12.1143314209659	0.472512	12.6449586256016	0.461362	16.2048909933083
Cenpl	chr1	+	0.5	4.43306392175041	0.441379	4.48335623240769	0.455446	3.85673311347058	0.513761	4.19461146888437	0.454545	3.52892478041801	0.629032	3.62051070534091	0.534483	3.50947158203622	0.481481	3.44548396411932	0.0909091	3.324858583244	0.592593	3.21866298208547
Cep170	chr1	-	0.503827	3.69139855482933	0.481915	3.47925122237811	0.482589	3.07262063322995	0.508344	3.154770929888	0.509916	2.58493287098942	0.520063	2.61767147971397	0.535164	2.56128701461807	0.537491	2.47498874386973	0.472303	1.52273016299105	0.456647	1.75982475069459
Cep350	chr1	-	0.5244	2.73544501028686	0.455164	2.48379385192434	0.517898	2.42375706095032	0.54386	2.50157671955246	0.541896	2.32998009231204	0.503834	2.4007026922325	0.558763	2.24938403267567	0.510659	2.38647533081799	0.533654	2.78740822077215	0.505051	2.74701587632643
Cfap126	chr1	+	NA	0.235877646742405	NA	0.144962809084808	NA	0.196064551568536	NA	0.238954528388507	NA	0.204400874119352	1	0.28655764709674	NA	0.24413360535531	0.818182	0.315479342347674	0.545455	0.360648407617988	0.416667	0.364997336306313
Cfc1	chr1	+	NA	0.432156745523852	0.307692	0.317922556297809	NA	0.371600977011307	NA	0.14385927602756	0.615385	0.338095245396485	0.4375	0.420369046842952	0.638889	0.524400375377881	0.558824	0.587056314676337	0.567073	2.46073182736273	0.445161	2.44512481320277
Cfh	chr1	-	NA	0.157143382561212	0.8	0.184061092675498	NA	0.1260095086068	NA	0.105596335260597	NA	0.0996177091887533	NA	0.132197318355024	NA	0.116720673540894	NA	0.135545760622182	NA	0.0795676241446119	NA	0.113753868203397
Cflar	chr1	+	NA	1.37010018259663	NA	1.19858894005389	NA	2.51867773004785	NA	2.57248713024893	0.214286	1.9818295178196	NA	2.07610687348908	0.151515	2.20178374934049	NA	2.15790988157573	0.365639	3.01605913957485	0.393836	3.22918624453492
Chil1	chr1	+	NA	0.265301597921082	0.285714	0.362485801495573	NA	0.0918842168549118	NA	0.111160876626146	NA	0.0352684947498117	NA	0.0398850636622381	NA	0.0286028567588842	NA	0.018144869450291	NA	0.0776750872752373	NA	0.104964543283523
Chit1	chr1	+	0.727273	0.597720358585284	0.742857	1.05928772558527	0.734694	0.873006372438685	0.924242	0.920488003085437	0.9	0.484323767510117	0.694444	0.498550310407889	NA	0.371184709066696	NA	0.401793057733789	0.7	0.292501268735222	0	0.37621142927352
Chml	chr1	-	0.477958	5.20654928060057	0.52867	5.50535248464651	0.531599	4.6394334393229	0.47128	5.04459942911749	0.501845	3.88364597315417	0.490385	4.1070489460896	0.41681	4.98757510182557	0.463882	5.20953430279871	0.405233	5.05602977770258	0.364198	6.0086241542179
Chpf	chr1	-	0.545828	6.80048631745789	0.581463	6.95818977334446	0.547423	6.98229498298562	0.549041	6.67687113582272	0.560757	6.08391697094104	0.548928	6.00900981897913	0.504615	5.95694251161498	0.502573	5.57689966062975	0.52194	6.31204760695896	0.497959	6.02380189928517
Chst10	chr1	-	0.804422	0.626968317097517	0.72956	0.604925641129825	0.740234	0.514683711389337	0.7373	0.51584444513393	0.723642	0.444520077740448	0.777083	0.388360820025033	0.626087	0.349930275858389	0.660256	0.354384082376406	0.543735	0.458530700027506	0.593972	0.466425792778194
Clasp1	chr1	+	0.486042	3.94616694452167	0.463152	3.8009174974179	0.476803	4.11811818251962	0.464245	3.83497411438055	0.492964	4.27521623536457	0.490229	4.28018369682538	0.45889	4.10191049465094	0.471738	4.21500676727012	0.447339	4.3067384892828	0.440538	4.24800367436493
Clk1	chr1	-	0.628705	15.3531935631806	0.577531	15.3721356546408	0.582257	12.7395952590996	0.550068	13.9273894283052	0.585379	15.2376724884316	0.568182	15.8619721719203	0.57461	14.7721557089391	0.530721	14.9322844646864	0.501805	11.118373976487	0.52973	12.7891195185837
Cnga3	chr1	+	1	0.191914004443418	0.454545	0.182589953616503	NA	0.205098947129819	NA	0.223708384758552	0.944444	0.388762538932021	0.825397	0.321173405325762	NA	0.328349519257256	1	0.342873988298313	1	0.567619975340556	0.93578	0.583137058942956
Cnih4	chr1	+	0.490823	11.3766965974143	0.46355	11.5402205747913	0.474693	11.9831737741378	0.49352	12.4480294514569	0.508247	11.7984784089392	0.464937	11.6264141078406	0.499619	11.3254368517026	0.45214	11.579736241382	0.454936	12.0472766805739	0.474715	11.4678438801733
Cnnm3	chr1	+	0.475623	5.60053601675771	0.490236	5.46869347907033	0.462482	4.79369119129394	0.476299	4.38509365369991	0.48244	4.73925800176686	0.422506	4.60843614926288	0.484554	5.11696375080106	0.434005	5.13272947470045	0.442969	6.30163948313028	0.482947	5.94875987206571
Cnnm4	chr1	+	0.590909	0.693223351122015	0.69697	0.704982777484967	0.606061	0.664249251099938	0.557692	0.583500452776935	0.570552	0.894247571303916	0.607407	0.846378185594309	0.48	0.916788786793435	0.617647	0.976333504171685	0.494915	1.91686480650032	0.524164	1.77482196545186
Cnot11	chr1	+	0.520633	29.2730843753655	0.500887	28.4504369608115	0.572464	21.2952359209057	0.549805	22.1953921024278	0.565045	17.8822796661851	0.56182	17.5402164511236	0.569867	16.3056895846588	0.569987	15.5815738810489	0.553036	13.9346349859015	0.56343	13.7629269781535
Cnppd1	chr1	-	0.51632	3.02809876629827	0.546479	3.14894722428306	0.494083	2.99021733834973	0.582031	2.68605394175328	0.577381	2.62271311701755	0.527027	2.84172633139537	0.526549	2.17478763119291	0.560209	2.17297074615088	0.5058	3.74919106261175	0.492441	3.73972555149551
Cnst	chr1	+	0.491525	1.81938778782768	0.482295	1.74447829447245	0.456354	1.91073120045367	0.477404	1.90978777770418	0.51209	2.07879535125257	0.52476	2.11168305530488	0.475524	1.85590858134573	0.467446	1.72676182310387	0.569405	2.3263815773911	0.559846	2.09037711409545
Cntn2	chr1	-	0.522222	0.568016975392782	0.5625	0.598870074361179	0.452381	0.479065977241863	0.571429	0.420774981903484	0.543046	0.57515074124171	0.49359	0.529989969874386	0.612903	0.50686819955851	0.4	0.488512515604365	0.478022	1.13974457180176	0.411924	1.0654253130998
Coa5	chr1	-	0.629715	26.7712225483163	0.625315	25.6084882185948	0.623616	22.5536639978454	0.641648	22.6689515378142	0.626348	19.4649269848453	0.633662	18.3240901381379	0.635586	19.1963393666049	0.636515	19.0939504034001	0.664714	16.2411911364308	0.633695	16.1368869377079
Col5a2	chr1	-	NA	0.124423803139977	NA	0.123850784027166	0.444444	0.206845349731105	NA	0.217091362218631	NA	0.193617780767407	NA	0.169610098116857	0.7	0.294351459116596	0.285714	0.312982444205853	NA	0.161800826934452	0.357143	0.193942869523453
Col6a3	chr1	-	NA	0.037569423668378	NA	0.0419695846159565	NA	0.0387660302022997	NA	0.0375190956454057	NA	0.0367402674091307	NA	0.0543920572110265	NA	0.0335210274813639	NA	0.0368590253950796	NA	0.0648596393516813	0.34375	0.0797123361321641
Colgalt2	chr1	+	0.782609	0.551284637643196	0.820755	0.582726262941532	0.649485	0.606933672700054	0.683673	0.699019395413069	0.685714	0.344267773433759	0.85	0.354470121840015	NA	0.192712505439221	NA	0.223728306286807	NA	0.0994085583968304	NA	0.0998401965343886
Copa	chr1	+	0.459521	25.8667744645248	0.463202	25.546619803004	0.489511	24.0616527115155	0.476586	23.4173052137278	0.470286	23.3958897190987	0.472949	23.0282357792643	0.476717	21.1689442492442	0.48808	21.4929465692388	0.455163	22.8916833075371	0.448021	23.0198843299964
Cops5	chr1	-	0.50358	38.8232772974426	0.49115	40.0804662190345	0.502741	33.3410737462062	0.506306	34.6589058054928	0.482818	31.0677749925406	0.486583	30.6847754688441	0.50844	31.9872597845381	0.497556	31.9959028176549	0.516514	27.5757336575128	0.531973	27.6970826679938
Cops7b	chr1	+	0.523077	8.90820870130387	0.483276	8.93962231034	0.513081	8.73838395406027	0.469853	7.99386304071913	0.471197	8.69484109783926	0.512595	8.45442639218474	0.483842	8.90297653988033	0.507463	9.06859189513316	0.54928	6.18550733757629	0.527992	6.23756832573253
Cops8	chr1	+	0.548362	26.3097262533229	0.540062	26.5731752424886	0.568557	25.9873395487961	0.586742	25.0785615318369	0.564321	22.7024724412759	0.564945	22.1147385254611	0.570293	23.3286597377029	0.566969	22.9912792303547	0.546045	18.1388573425423	0.534301	17.5083689974164
Coq10b	chr1	+	0.572128	4.72198194743117	0.5458	4.48549309783412	0.551008	4.02148820074671	0.562223	4.52266019494761	0.555288	4.12310845829772	0.579648	4.1049129487711	0.551813	4.6736055980302	0.568102	4.27426410542239	0.583225	3.79621833928831	0.567653	3.9005899051177
Cox20	chr1	+	0.594891	12.847748163877	0.54	13.0780172565071	0.5625	12.6195635681152	0.513944	15.3058883939629	0.469298	10.1294560781019	0.588652	10.7312626016997	0.578947	10.5725487711919	0.59589	9.81455920069184	0.478632	4.77904111432101	0.385185	5.10644538607297
Cox5b	chr1	+	0.572368	48.2316424661263	0.563863	49.2440067966974	0.56268	49.7274895061368	0.576968	52.257129197898	0.571654	52.6111710551493	0.586957	51.6476436694173	0.549899	49.6097383620069	0.558836	47.5671961500848	0.558081	52.3452012760776	0.552388	55.1092528118879
Cr1l	chr1	-	0.414194	5.69514225047996	0.428249	5.54609728698977	0.421519	5.10855292311843	0.464646	5.08639174416123	0.441939	4.51882639320146	0.424057	4.63898757718444	0.437372	4.31972398590736	0.422371	4.53769363854889	0.336887	3.64220465702622	0.398589	3.54470161487128
Creb1	chr1	+	0.514306	4.94759711811678	0.491403	4.89230266616528	0.503881	4.34686430800341	0.539076	4.56541910474889	0.53944	3.87006127935287	0.571865	4.05883571095852	0.542813	4.41224146601985	0.534225	4.47125040264894	0.558824	3.25306679549788	0.520566	3.94683425744074
Creg1	chr1	+	0.472155	5.8265262872812	0.472489	6.06073834234365	0.407118	7.76638700133594	0.425637	9.14235241048984	0.452888	7.15947457096474	0.434128	7.64036449670254	0.444345	8.29867446655677	0.470046	8.11351704073326	0.468535	24.7700164163196	0.457892	24.3879863648218
Creg2	chr1	-	NA	0.0432550640620797	NA	0.0422203288977918	NA	0.0274943644130294	NA	0.0347976796389108	NA	0.0342757862473042	NA	0.0283763110200082	NA	0.0316016721137066	NA	0.0306277214099915	NA	0.120682677463341	1	0.129499122098762
Crispld1	chr1	+	NA	0.0926792791408696	NA	0.0542454302202077	NA	0.0684766362953283	NA	0.0883653877112811	NA	0.0778779745763776	NA	0.0653034095793528	0.384615	0.255795062916394	NA	0.259180270340679	0.3	0.325616030311941	NA	0.34679634157972
Cryga	chr1	-	NA	0.0212301849477943	NA	0.0167752135235779	NA	0.0705872175510062	NA	0.0512375503659804	0.416667	0.0451565567481607	0.590909	0.041782460215037	0.4	0.131839578660676	0.8	0.0464641223183706	0.666667	0.111884046945085	0.733333	0.17739870537189
Crygc	chr1	-	0.905579	2.95764026944463	0.937799	2.89788612243182	0.845815	2.19619644428735	0.808743	1.55450990380926	0.943662	0.950624036038464	0.895833	0.970139820514536	NA	0.48978571207274	1	0.323652760423765	NA	0.12123144187646	NA	0.134803318794046
Crygd	chr1	-	0.980392	7.46257522459677	0.98995	8.67219793285044	0.955556	4.56138994349547	0.928571	4.0144388115862	0.923077	1.68883179485501	0.915254	1.45385078005046	NA	0.546125362318461	1	0.560914161450369	NA	0.158901467451191	NA	0.0687129757277042
Cspp1	chr1	+	0.581395	2.70882307391774	0.594398	2.62945475031998	0.630117	2.03290623554221	0.676129	2.16497842849885	0.628415	1.76593273719953	0.634831	2.01626812370605	0.582011	2.01408434359497	0.605606	2.1458917403989	0.638642	2.85931209473372	0.576006	3.20729450357886
Csrp1	chr1	+	0.563644	52.0404365838919	0.577161	54.7810206451197	0.594285	58.9247187964037	0.600532	55.1171270536268	0.563988	61.7041107881582	0.582304	59.6769309444535	0.568381	63.1532476605387	0.568734	64.6035398869507	0.492818	31.5468968051731	0.489089	30.653879564747
Ctdsp1	chr1	+	0.513707	13.0389886647724	0.511939	13.6306408793576	0.495166	11.9046062245422	0.533597	10.2764022731625	0.494336	10.0257307846801	0.505338	10.2768476679677	0.455067	8.66012829234794	0.427699	8.8001709771851	0.471173	7.56162548029779	0.522551	7.23177620328273
Cul3	chr1	-	0.489952	43.1069908785461	0.485988	42.5754437280964	0.487749	40.3410366342448	0.461593	41.4868542174288	0.460648	36.1436861019821	0.492664	35.1455397698391	0.519512	35.3068357658362	0.495327	34.1171852548226	0.539894	27.1049990587918	0.525366	29.718345551352
Cxcr4	chr1	-	0.6	1.02005872036222	0.641026	1.01597670399988	0.608696	1.02601331705777	0.697674	0.930947748629677	0.45	0.498353887711081	NA	0.534220799393956	0.5	0.647652207487778	0.481481	0.741035933102996	0.571429	0.737848886287921	0.590909	0.722778413932234
Cyb5r1	chr1	+	0.763449	5.70741248803877	0.731788	5.98909527669592	0.716175	7.14514615432213	0.72284	6.83101900728569	0.606946	5.55719771168936	0.605909	5.82480956521941	0.646971	6.07347529372147	0.690439	6.37554359924959	0.732965	10.2868853905422	0.731425	9.87038589357889
Cyp20a1	chr1	+	0.561783	12.4336816324611	0.618052	12.6476744375732	0.61039	11.0676187168885	0.60455	11.693338411899	0.622235	9.11348601108112	0.616482	9.03739139465985	0.581869	10.777856719207	0.586352	9.9412083227975	0.658816	11.1234734453336	0.60532	10.8612791230971
Cyp27a1	chr1	+	NA	0.206830655934103	NA	0.208512893360258	NA	0.0829960151140455	NA	0.109014392326453	NA	0.28822891951081	0.764706	0.374305211927928	NA	0.258360272647666	NA	0.25755193434182	0.571429	2.28650899743196	0.612069	2.43799835646847
D130058E05Rik	chr1	+	0.567901	0.8821256434638	0.498413	0.997458476343069	0.432039	2.24605663043188	0.392211	2.43483118798364	0.505762	2.39027919238847	0.494927	2.38462081574011	0.408629	1.6790821925163	0.512821	1.8141070720671	0.411348	0.703560460944613	0.484444	0.816433926408949
D1Ertd622e	chr1	-	0.536	0.346534322693501	0.528302	0.330121458272288	0.52921	0.305812748673907	0.498246	0.319509349380735	0.550173	0.273612192531506	0.540059	0.275310862742049	0.532787	0.343136824852819	0.514423	0.335707893732357	0.456446	0.381127935704385	0.595238	0.390015364585638
D1Pas1	chr1	+	0.48584	34.296398774755	0.492839	34.0956214866722	0.430983	40.4472777841987	0.454778	40.3495709132096	0.489988	37.845983886735	0.490412	36.3064256565511	0.506154	35.5916923149484	0.510524	34.9959321279728	0.488103	19.8255140761025	0.489014	20.0196638169683
D230017M19Rik	chr1	+	NA	0.18591832066747	NA	0.176745033207182	NA	0.0820981602444224	NA	0.10983819762929	NA	0.158591068716908	NA	0.171515628624051	NA	0.225498810736395	NA	0.222522647654052	0.727273	0.321496239862821	0.945205	0.355281074249949
D2hgdh	chr1	+	0.546875	1.43721558040651	0.553073	1.57328853765862	0.518519	3.40033845817712	0.548961	3.28513964598325	0.563107	2.97995301259586	0.584821	3.12540480256807	0.61165	2.82141625764957	0.527273	2.62650905873256	0.714646	2.69325800306063	0.640704	2.56851596476316
D430013B06Rik	chr1	-	0.604938	0.94379059367278	0.645669	0.811160431706343	0.57971	1.05975093443965	0.630872	1.0323235085311	0.457143	0.692625676333078	0.551948	0.879842191066644	0.525	0.736902488276107	0.5	0.95124865804036	0.606838	0.923501601876676	0.481013	0.704356942074871
D630023F18Rik	chr1	-	0.680328	2.16170567094977	0.687919	2.21317084004729	0.687169	2.26536798583971	0.638311	2.59921221629098	0.608324	2.13005075394617	0.643798	2.3178011675843	0.622389	2.46591587883641	0.650322	2.51179783848935	0.632853	2.68984575054641	0.600478	2.55585474995865
D730003I15Rik	chr1	+	1	0.3215359960973	NA	0.203251549746255	NA	0.206175764364305	NA	0.184762950835634	NA	0.462450965472668	NA	0.44597678340571	NA	0.237707203176974	NA	0.221165917140792	NA	0.411523717423979	NA	0.369863442950823
D930019O06Rik	chr1	+	1	0.473868392391937	0.975	0.447980176597432	1	0.263762637245263	1	0.323352818079966	1	0.314974071776005	1	0.36638073221594	1	0.573656333939414	1	0.67133870425874	1	0.341893374867226	1	0.343896281651859
Dars	chr1	-	0.492589	77.6146429863461	0.505032	78.0051278138142	0.493383	73.14871721131	0.501461	76.0341498038828	0.524124	66.4101529890284	0.528159	66.0555960169686	0.490141	65.2955832787014	0.524571	62.0002833463384	0.507541	54.072283071992	0.500548	56.4625463914608
Dars2	chr1	-	0.611111	8.03988534303045	0.352941	8.52381051663488	NA	8.03926584645161	NA	8.64946397233656	0.384615	8.83912434872708	0.545455	8.87734519479292	0.5	8.6146188597433	0.416667	8.8632884724634	0.4375	10.8061970166544	0.409091	10.6419976185365
Dbi	chr1	-	0.591678	49.3168835645581	0.579132	53.573685253889	0.596926	47.0353109129961	0.593181	49.7484665651426	0.601175	46.0155475076809	0.597338	46.4524777619502	0.598127	42.7633386278615	0.599126	41.5278811378951	0.609781	47.5673740467877	0.604867	45.4520388389544
Dcaf6	chr1	-	0.551612	5.05905657221872	0.545228	5.02875150854529	0.612727	4.81477015170358	0.607292	4.91996932491517	0.61174	4.14106151088247	0.656841	4.35233960573302	0.63485	3.75293346073856	0.649033	3.83065008431567	0.540771	5.15344701080391	0.546135	4.89129281650387
Dcaf8	chr1	+	0.506898	9.17289052873629	0.504042	9.02989504258284	0.528041	9.1481625974937	0.531319	8.69465273534992	0.499779	9.90501219560975	0.516882	10.2390390039221	0.499181	9.65934231169678	0.513123	9.82251760326155	0.454893	16.5129265423356	0.46267	15.7596033217842
Ddr2	chr1	-	0.290323	0.645751458828744	0.391304	0.59484646399993	NA	0.333734901633644	0.357143	0.366066781831789	0.518771	0.877719198163372	0.506944	1.17759726762508	NA	0.230287577219434	NA	0.254464296828857	NA	0.304166636691706	NA	0.302453790541217
Ddx18	chr1	-	0.44807	87.2770936654273	0.459055	90.7617421531677	0.426851	93.6304758411596	0.432414	95.1981854871385	0.401883	80.7976831210606	0.409574	79.1663475140547	0.409991	81.9854039288042	0.410491	79.7016886091701	0.420939	53.183824122192	0.432603	53.2455917243883
Ddx59	chr1	+	0.415332	7.38426524271217	0.479127	7.46448715542885	0.406332	5.73219360136101	0.398618	5.91513487818029	0.356394	6.28103798254358	0.411297	6.36947878094677	0.435414	6.09462271688753	0.337621	5.96134846690182	0.304291	5.74373470032229	0.382564	5.86448455467465
Dedd	chr1	+	0.58179	4.61159751932024	0.582569	4.76171634239394	0.549935	4.84647307332269	0.573048	5.02668839252759	0.523062	5.00941667125589	0.561881	5.12776745997976	0.557029	5.83489298311806	0.585693	5.86822600622834	0.535036	8.97903997063868	0.52819	8.76182472068829
Degs1	chr1	-	0.549684	64.8991431412601	0.553868	66.1874433942321	0.57155	55.6056186796634	0.588168	57.6040450617188	0.513948	38.2993015199571	0.566921	35.9516219423419	0.461484	42.4506312453149	0.47117	40.4184962139396	0.502798	31.4754308137812	0.523534	32.6058583950226
Dennd1b	chr1	+	0.430876	2.59205593820046	0.44362	2.54471034535401	0.389288	3.74822744206884	0.423258	3.71181837714144	0.402142	3.10200819814709	0.395896	3.25054824321658	0.390525	3.49604488652704	0.378196	3.55913309583646	0.467566	1.949160221868	0.463038	2.14249852911015
Des	chr1	+	NA	0.32614405059651	0.93617	0.437120774341074	0.941176	0.621116745805438	0.875	0.484895943705043	0.851613	0.971776158185423	0.865031	1.03999815729703	0.858696	0.944311810749727	0.842857	0.736383313087763	0.762411	2.37512684455658	0.813149	2.26424569315902
Desi2	chr1	+	0.478827	5.60102641484748	0.463953	5.37798028747969	0.501522	6.2891314326859	0.50229	6.5579886074949	0.477889	5.80727326402269	0.483235	5.68427341283549	0.432432	5.26799143574043	0.455422	5.08263503158446	0.491736	5.43699524109997	0.484823	5.58296179821543
Dgkd	chr1	+	0.515136	15.1925992853782	0.518379	14.6039131489196	0.542569	14.0500249889126	0.515449	13.077543238301	0.525101	14.9550385572294	0.494634	15.4316756381844	0.506603	13.8205730188899	0.544534	13.3248928183762	0.510876	23.5666186444498	0.517932	21.8097994287137
Dhx9	chr1	-	0.559495	110.485835354991	0.534666	105.814930486764	0.564221	104.412225563143	0.563756	107.559639274214	0.567746	97.8081238301053	0.571109	96.3875483329233	0.557625	103.321884717855	0.565897	100.921084922149	0.549909	43.6798286381524	0.538995	49.5873322679846
Diexf	chr1	-	0.488987	8.03382059957843	0.505822	8.30208656910904	0.443206	9.54030024410284	0.47981	9.54082943341128	0.471819	9.3525014781308	0.447819	9.17682741043504	0.491433	10.982694538542	0.478163	10.8327223245516	0.556639	8.90132115192762	0.476392	8.56549508467145
Dis3l2	chr1	+	0.4875	1.90656649118295	0.587467	1.90959637688238	0.55137	1.69475539768359	0.52381	1.71167918134579	0.551378	1.66037393712997	0.512195	1.67794842754744	0.484848	1.42546020870378	0.539823	1.35088393373324	0.511387	2.40716413176125	0.522682	2.29345864339907
Disp1	chr1	-	0.43958	2.10635621333113	0.426154	1.95034335483926	0.438111	1.84946887486485	0.544061	1.77327303107479	0.401258	2.05290604593731	0.392082	2.00266275138651	0.403766	1.89759148535533	0.398798	1.97708220320425	0.318872	1.57388699524716	0.335329	1.51892856426767
Dnah14	chr1	+	NA	0.0152737025063282	NA	0.0150858095130421	NA	0.0690328639769696	1	0.0783317523919701	NA	0.0453466213027932	NA	0.043837054039388	NA	0.0721253582468681	NA	0.0898373144178413	NA	0.038569616019053	NA	0.0471348017464859
Dnah7a	chr1	-	1	0.117749619813058	1	0.111265378019627	0.970588	0.21693944925649	1	0.244141221946984	0.983607	0.191067376481213	1	0.191125219437469	0.971014	0.29651083015667	1	0.314825636496487	1	0.229239460693338	1	0.231454422874965
Dnah7b	chr1	+	NA	0.0302514196928781	NA	0.036161583906932	NA	0.113476547934851	NA	0.0992182594424316	NA	0.0780935714466857	NA	0.0758204570835765	NA	0.0594091928532675	NA	0.0636614288521219	NA	0.0463290297827329	0.7	0.0565661173558197
Dnajb2	chr1	+	0.508235	3.82253252352567	0.506757	3.9599610892961	0.459584	3.18643392102015	0.541463	3.11328311641663	0.581262	3.32306488253018	0.529611	3.51504329338662	0.565657	3.352305972817	0.507163	3.30886007335942	0.468992	4.19365492819153	0.436333	3.76264859289607
Dner	chr1	-	0.8	0.408184032503788	0.9	0.366046099441116	NA	0.290818155921892	NA	0.250190045265323	0.681818	0.236574798069552	1	0.308157289141699	NA	0.352059075541416	0.6	0.389952866028968	0.266055	0.660140823251797	0.548148	0.63244472322173
Dnpep	chr1	-	0.536695	17.5107199038513	0.524226	17.96484955653	0.514597	14.8765153081719	0.495622	13.6334810902314	0.519884	12.7045850926645	0.494845	13.0661842010459	0.504788	11.6535654304759	0.523007	11.5382473205006	0.485289	18.668471042808	0.493628	17.3476900125851
Dsel	chr1	-	0.520776	3.20018422074422	0.460879	3.09600639524774	0.471284	2.29791217850846	0.493333	2.64586572914823	0.497059	2.19075511039706	0.444733	2.18231126142522	0.510393	2.02071663770562	0.471233	1.9687388006787	0.476364	2.14711368590867	0.477419	2.62094952856401
Dst	chr1	+	0.685355	7.87528537942971	0.687333	6.66310686593412	0.725193	7.91029465497363	0.72316	7.53100674540757	0.71789	9.39109217901725	0.711187	10.968977645231	0.691741	7.90276691494956	0.693154	8.8614821095239	0.662928	15.5776845662425	0.673942	14.597912824701
Dstyk	chr1	+	0.568134	3.82931651604641	0.530915	3.73732729240752	0.526316	3.43110906029031	0.500445	3.40346364965364	0.492828	2.73379582453418	0.539918	3.0354320214006	0.5	1.50706722929862	0.464589	1.5716259415317	0.46888	1.61544440672967	0.490722	1.57978814992495
Dtl	chr1	-	0.555434	9.83535667105127	0.554857	9.55893491418334	0.533721	8.5840394923	0.534003	8.36431487885387	0.548895	8.65405695876725	0.55375	8.56142694889835	0.557211	9.56999801981591	0.535665	9.95989253823027	0.557557	10.0984554298272	0.558203	10.5877260865584
Dtymk	chr1	-	0.520776	56.089809723761	0.504349	55.0716679133452	0.507812	54.0502636847451	0.520108	55.3729718103803	0.513925	58.0477153220779	0.516585	56.720708761752	0.49629	60.3453787657329	0.509371	56.2541711696821	0.523492	37.1072875220961	0.502833	39.0592829691302
Dusp10	chr1	+	0.609756	0.825339142645022	0.552941	0.857454947659807	0.493333	0.664858728100002	0.339623	0.59019190165153	0.642857	0.63934677815361	0.385246	0.715237336707548	0.66129	0.906956908647516	0.425	0.825112389098745	0.293233	1.17241632800334	0.325926	1.1881185781153
Dusp12	chr1	-	0.497964	17.9218983075883	0.496723	18.8934282359463	0.540757	24.22861852008	0.528855	25.2719612863582	0.550418	22.6331532759496	0.550234	22.3579066730448	0.57389	25.8823090206022	0.593121	24.675531878602	0.562838	14.3023679065431	0.558469	14.5368399900259
Dusp23	chr1	-	NA	0.34073693997772	NA	0.269236228396148	NA	0.237543508708883	1	0.336011736915437	NA	0.241582240948198	NA	0.209109854078566	NA	0.182019654699373	NA	0.228530984594256	NA	0.251011727070651	NA	0.250485599461276
Dusp27	chr1	-	0.797667	13.8406753773756	0.809774	13.1108920612592	0.725221	29.1081619512925	0.737134	26.9678999141218	0.702268	26.6140410785647	0.704609	25.2908574692247	0.714001	26.7407394356829	0.710448	26.8946251502307	0.870885	6.91218113027657	0.864051	6.664191335235
Dusp28	chr1	+	0.870504	1.15586562493547	0.832487	1.25814101426834	0.816327	1.25488386757344	0.797414	1.53712651097941	0.810924	1.32124740114989	0.752727	1.43917362962905	0.712121	1.2085294710562	0.832215	1.20032315989124	0.700422	1.57466436441231	0.757396	1.87254189003662
Dyrk3	chr1	-	0.5078	15.9369346818301	0.487024	16.0144697309354	0.45366	17.3694419336395	0.480702	17.4698335010687	0.458621	19.0441881304043	0.446377	18.4753940268033	0.455903	18.5136841517187	0.442297	18.2935302477003	0.435039	17.7545806297873	0.430372	17.4517841333913
E330020D12Rik	chr1	-	NA	2.01942039070537	1	1.95441873343128	NA	2.51221975188638	NA	2.47502535232375	1	3.98780902692182	1	4.30333153860279	1	3.31751115841312	1	3.49273265778867	0.968504	8.27943578118697	0.994152	8.29296813922582
Ecel1	chr1	-	0.34375	0.340956770261577	NA	0.216927475450611	0.285714	0.467438638510985	NA	0.395407495824323	0.166667	0.348479599362235	0.189189	0.44154112242481	NA	0.302477661898636	NA	0.256813841785394	0.416667	0.66507074191214	0.348837	0.834188613520182
Edem3	chr1	+	0.49056	12.6660793899084	0.50606	12.1058100990303	0.530573	14.6102874233718	0.535788	15.1485478467761	0.552632	12.2399910106632	0.512598	12.5283865543389	0.505508	13.7303107770612	0.528334	13.3634048834227	0.502605	9.07290606775154	0.504307	10.2636287918421
Eef1b2	chr1	+	0.444117	386.049196775239	0.451136	411.722638623825	0.460089	385.416940876976	0.460278	403.396485281927	0.451844	388.732085427787	0.447061	380.100475156325	0.455094	409.387058590932	0.467449	403.033687350499	0.453175	505.653881681299	0.456838	475.357958170056
Efcab2	chr1	+	0.44086	1.11633641738257	0.535545	1.30394854144005	0.427273	1.10170304916546	0.547264	1.20142654034098	0.563107	1.55649244507994	0.537778	1.58225107108385	0.506494	1.5495623488854	0.551546	1.67101818846012	0.487805	1.46258764973825	0.574545	1.55420551667662
Efhc1	chr1	+	NA	0.154418827111221	NA	0.183023049720558	NA	0.239206909114766	NA	0.242805964068256	NA	0.209012685673099	0.7	0.322325440366605	NA	0.188882488147617	NA	0.261150252704248	0.903614	0.992582430363513	0.666667	0.927749652352499
Efhd1	chr1	+	0.695122	0.503230313327247	0.755319	0.443734001016619	0.444444	0.53953547344575	0.487179	0.66299380857878	0.771704	1.25135016707923	0.716923	1.2774618541981	0.618056	1.35117472498749	0.72766	1.42858043843329	0.707317	0.704650115269829	0.77707	0.686978858193091
Eif2d	chr1	+	0.511411	14.4366697174765	0.518501	14.4280485784889	0.463198	14.4002853613795	0.465302	13.5211592035993	0.492448	16.6877788485009	0.501442	16.2336624716322	0.474326	17.9286212671671	0.488777	18.0748523344897	0.476842	12.9424534125837	0.510256	12.8041825143658
Eif4e2	chr1	+	0.519506	32.1826609397227	0.517857	32.0611765319161	0.519704	28.5170664134936	0.522998	29.0782381729978	0.541433	25.1508227767934	0.526432	25.4400397917803	0.551867	19.0401827323371	0.529607	19.1220284746396	0.547115	12.3415451285535	0.540303	11.6833139148485
Elf3	chr1	-	0.650864	45.5294100281636	0.644582	49.0664780617313	0.649874	11.679366747022	0.649457	10.482628106149	0.63373	17.7336065001941	0.592371	17.1606488153673	0.632682	15.7148971839739	0.62828	15.475361118301	0.688634	17.1860860473225	0.682019	15.5749618273958
Elk4	chr1	+	0.5039	3.26796399267414	0.4	3.02181632339113	0.466234	2.72441650696807	0.537097	2.60564842392357	0.498783	2.88465375208348	0.434644	3.00076799098088	0.473588	2.84908203466443	0.447541	3.17112014455345	0.435597	3.45041296848075	0.44406	3.21010177714467
Enah	chr1	-	0.553152	17.6458840744644	0.548632	16.8555315443222	0.589495	22.2819697030343	0.598555	22.6980055185979	0.578417	28.818908061329	0.590287	30.4490620214424	0.596649	27.5309765685905	0.603991	27.6598308016401	0.558219	23.0256068201724	0.546906	23.227343280121
Epb41l5	chr1	-	0.573718	2.51194604610656	0.550984	2.40221557799522	0.563418	1.68555799357001	0.612184	1.54010072845334	0.584795	1.64397037604362	0.543396	1.72849755287653	0.567376	1.72925917969766	0.590592	1.84786032464413	0.561497	3.34180115327157	0.577735	3.21562882620511
Epha4	chr1	-	0.431868	19.8872848085276	0.426329	19.121493946975	0.520041	8.04215752383646	0.498739	8.06831314172948	0.547832	4.84873247076248	0.520453	5.08353265949617	0.574599	3.88564446477722	0.583548	4.15246411253002	0.485915	0.873813387913759	0.67509	0.942819834575191
Ephx1	chr1	-	0.52669	5.1103776987924	0.49354	5.06164109384758	0.545455	2.55661472183779	0.516667	2.76209809972916	0.687879	3.7641270654142	0.666667	3.6966406723926	0.5625	2.7721243372917	0.526667	2.89614448573659	0.397119	7.29493548821009	0.507246	6.77993867957211
Eprs	chr1	+	0.480778	39.6825722462211	0.494101	40.8352456172979	0.481875	38.6180358767639	0.484986	39.6508122863765	0.487519	41.7853561117338	0.484703	42.3268262901658	0.483246	36.4991413368161	0.49438	36.5158410943817	0.491368	29.640516369304	0.477481	32.9114858443642
Ercc5	chr1	+	0.553919	5.13517769919884	0.540741	4.94722902647851	0.558601	5.39100244138914	0.543587	4.95820578905357	0.528676	5.22983875712853	0.53058	5.35920854382764	0.502203	5.27935375099552	0.538961	5.11037994710858	0.506891	8.92569739562902	0.500493	9.09261871727927
Espnl	chr1	+	NA	0.0569257484366937	NA	0.044980370513175	NA	0.0283904511362174	NA	0.0457954230390765	NA	0.0686125337305999	NA	0.0952287109767877	NA	0.13256596752382	NA	0.118357644913829	NA	0.130000563882321	0.8	0.14918729091881
Etnk2	chr1	+	0.473214	2.08066041662034	0.505415	2.09194187041727	0.471947	2.08495873041181	0.488688	1.84313789917045	0.559184	2.04793457064242	0.607143	2.22891642231961	0.669492	1.31035913540354	0.610169	1.29628388557285	0.713115	1.26108464214384	0.470238	1.09064919029558
Exo1	chr1	+	0.53868	13.3873432333767	0.538561	13.3407962927504	0.562808	11.9277059901984	0.567556	11.4789066271908	0.50802	11.9757454724016	0.52022	11.516718492423	0.515079	13.0483665001411	0.537724	13.3669589220507	0.510447	12.6039818846824	0.515771	12.1083108927901
Eya1	chr1	-	0.241259	1.36759043585965	0.156085	1.36135326550716	0.195652	0.521358201353295	0.203125	0.502991577299231	0.7	0.22235131725294	0.272727	0.207039368048128	NA	0.127370631194121	NA	0.16724822717185	0.612403	0.636345293470754	0.441379	0.66644311516503
F11r	chr1	+	0.57971	12.6579895421932	0.564433	13.1472192597273	0.466791	18.2904521948046	0.459408	17.6131724956913	0.494808	23.8494899916372	0.469435	23.2700950504162	0.480031	27.1236540604323	0.483216	27.3783254127062	0.503786	38.6498531502569	0.497078	37.3609195077809
F5	chr1	+	NA	0.0771772941372712	NA	0.0725194964168672	0.581498	1.06282213936406	0.58047	1.01353345479444	0.518841	1.14613378107994	0.557307	1.09470420662098	0.452282	1.29964605738494	0.451613	1.29421028726762	0.272085	0.938039062050133	0.311346	0.901579594400123
Fam117b	chr1	+	0.553905	9.10323538009772	0.516423	8.3319194960454	0.461396	6.9252693098473	0.510719	6.76579318476943	0.505421	7.66905758282069	0.515968	7.75291030291885	0.455237	6.90246807335927	0.503982	7.16994308910901	0.508081	8.24222710899386	0.497124	7.8921518319151
Fam126b	chr1	-	0.527407	2.70935667303614	0.506105	2.66661948317744	0.477577	2.82335680166695	0.496454	2.97483603264034	0.527066	2.45569013572487	0.479521	2.70536311619064	0.47421	2.37123644923847	0.501739	2.3479218956253	0.510532	1.78282581296752	0.492743	2.03465202445885
Fam129a	chr1	+	0.945331	6.18661397629099	0.931749	6.03998609415329	0.964591	4.56461615663934	0.958807	4.37217839446363	0.956522	4.90593151644934	0.960181	4.91132626859183	0.946269	3.76668772736754	0.940299	3.83999527964892	0.746599	5.82315025813261	0.745882	5.86726878542994
Fam132b	chr1	+	0.394495	1.28829136510914	0.561562	1.40947548937714	0.528571	0.837455274657098	0.534483	0.584635921049837	0.413861	1.73701686911072	0.538288	1.54943908413773	0.485714	1.37896861848401	0.52549	1.4579665805974	0.579627	3.35599146615269	0.544084	3.38337973297197
Fam134a	chr1	+	0.489796	7.74126590457186	0.55102	7.38674348877336	0.476364	5.56265639478524	0.549689	5.30058352819121	0.550388	6.06378726634327	0.497382	5.8039399220123	0.585714	4.94746445985447	0.487805	5.12910303904908	0.531828	9.568280915915	0.539623	8.98173371912898
Fam135a	chr1	-	0.474257	5.07828318220552	0.469518	5.0004509505211	0.460086	5.05309762024003	0.481178	5.35892614237749	0.497703	4.78794279880762	0.498654	5.19144246122225	0.492696	4.4120096058764	0.496715	4.6167631842751	0.493269	5.1592176696934	0.557323	6.03862678469691
Fam163a	chr1	-	0.03125	0.614811280739577	0.0598291	0.561507275954074	0.018018	0.673642437460305	0.083871	0.61343393847919	0.0471204	0.639698500112619	0.0185185	0.64166177309457	NA	0.367749331340551	NA	0.362604478525255	NA	0.168316031468134	NA	0.154666146808006
Fam168b	chr1	-	0.550137	25.5053885259862	0.548476	24.7639951284392	0.550435	20.6030752335563	0.550367	20.4635386854149	0.540789	19.0749463512158	0.55769	18.5243579456406	0.558439	19.3198831757852	0.56326	19.1333540059124	0.564037	19.2542461908568	0.576285	17.8814273434927
Fam174a	chr1	+	0.421829	1.06239126587529	0.369973	0.964104346815186	0.404762	0.949972861879065	0.406654	1.21207566175277	0.345455	0.709866575165138	0.408578	0.802551894727272	0.316092	0.583108508998108	0.37037	0.54605478191978	0.338129	1.15087485070815	0.401818	1.21054164342887
Fam178b	chr1	-	0.676129	6.17978073201376	0.632469	5.78513484307941	0.606513	5.26593919523149	0.649926	4.79560984726357	0.626984	5.95217209450364	0.621277	6.21497723261287	0.582633	6.27539862816208	0.613221	6.27338479075932	0.571529	9.87870664236396	0.6	9.31492341469977
Fam20b	chr1	-	0.514521	8.19787735691643	0.516343	8.02616498899361	0.541899	7.23869098935838	0.541508	6.94330152302688	0.54564	5.99521514820079	0.527182	5.93909642294159	0.513057	5.47790693281583	0.539781	5.68536484148729	0.498407	6.46635358967034	0.498359	6.19919012778474
Fam72a	chr1	+	0.468966	4.60484746359667	0.516204	4.71727273215282	0.512621	6.2382379746441	0.466431	6.40746107558628	0.473154	5.52664592144004	0.521523	5.72622483050504	0.425824	5.37367130974923	0.468852	5.06227779033239	0.489796	3.67806250781895	0.509202	3.58934088575364
Farp2	chr1	+	0.531915	0.941427914762364	0.442308	0.783644406340207	0.521127	1.0138400931538	0.512821	0.976466018754406	0.582677	0.88996226963965	0.548387	0.959413613673775	0.544304	0.946802093552648	0.431034	1.06583459954184	0.5	0.572065518604923	0.461538	0.553221490156882
Farsb	chr1	-	0.501975	74.0179053831213	0.495153	75.8311362102159	0.493488	76.6243105696434	0.492305	77.8095656240364	0.478338	86.193640538217	0.488959	86.3928912964604	0.473725	77.6922585775384	0.496309	76.1554945277119	0.528556	75.1548345746995	0.517557	75.0674747924442
Fastkd2	chr1	+	0.548097	10.9987757414536	0.527671	10.8113437676517	0.569681	11.2195275402086	0.567854	11.6717156419704	0.578083	11.1602229713394	0.569049	10.5202206612492	0.572906	14.1204311772307	0.555298	13.7829454071748	0.538257	10.328207577806	0.540694	10.4919047328921
Fbxo28	chr1	-	0.509138	8.12495705399566	0.550382	8.20692149841354	0.542414	7.72251768396972	0.513043	7.64760744543654	0.523686	7.4734752415326	0.518742	7.33374625115732	0.469772	7.38682598540167	0.484344	7.98858755899666	0.530313	9.49397922110767	0.517966	9.49042740689227
Fbxo36	chr1	+	0.761194	0.822521411245551	0.808	0.986285715033825	0.772358	0.983554665410436	0.618644	1.03317928220911	0.707865	1.27887517171622	0.570093	1.21171728196557	0.619048	1.43378610684981	0.551282	1.56329707632619	0.431373	0.899899154742978	0.568182	1.00299191851324
Fcgr2b	chr1	-	0.108669	3.46631353029316	0.0984361	3.2846099861045	0.164474	0.927783026541529	0.143713	1.05513366527986	0.25	0.578820227978007	0.374101	0.741019268499959	NA	0.346297108600653	0.3	0.495015437859878	NA	0.181030577973035	NA	0.209430187736103
Fcgr3	chr1	-	0.0862876	30.862158430935	0.0676816	31.8069064388269	0.0884931	19.6868603627388	0.085443	19.2259856568169	0.0852632	13.7794261808265	0.0656841	13.4877600401148	0.11976	9.26762875379803	0.0853242	8.41131762694859	0.09101	5.66144448760335	0.128009	4.74032453865283
Fh1	chr1	-	0.494375	30.2330476632297	0.509066	30.9324650687239	0.480044	29.7976072745277	0.470385	29.9050862949745	0.484969	28.9182571665002	0.490009	28.6278422351698	0.481172	25.0537954035628	0.469504	24.774130313074	0.442176	33.2247571737717	0.434574	33.649033218904
Fhl2	chr1	-	0.0434783	0.514694889693759	NA	0.432512226377542	0.0434783	0.577218878365833	0	0.453494185896052	0.134529	1.51180438538518	0.08	1.43099970488717	0.197568	3.66977818584391	0.181507	3.37042464502867	0.350265	8.53924368135611	0.337143	8.31606908490837
Fmn2	chr1	+	0.51995	2.41816073929236	0.548857	2.27687697121528	0.669145	2.56995998975592	0.595238	2.42151066130813	0.589768	2.0167848604948	0.571823	2.02830398574872	0.527059	2.46249611683506	0.539043	2.42246772396173	0.460169	2.57373132697273	0.50039	2.73170909593391
Fn1	chr1	-	0.495138	110.55928134541	0.501074	102.360472259365	0.513399	95.3037833292948	0.518541	87.3098381995047	0.506416	86.9267903932102	0.506058	90.4429415188684	0.468802	72.1059821746656	0.469613	74.4152841266784	0.462437	84.2266169407308	0.465847	72.3930392443544
Fzd5	chr1	-	0.581424	7.63807712516568	0.605753	7.11555311562507	0.453488	4.17482815647931	0.431162	4.31279638211908	0.464953	4.19343224288403	0.494939	4.58436871505685	0.477535	2.95989228081095	0.398385	2.8817498856531	0.513819	4.55129956789676	0.478944	4.24264285629827
Fzd7	chr1	+	0.587597	8.48083116272879	0.602091	8.53592600404178	0.486355	24.8888473146473	0.488287	24.9163504247734	0.469028	28.8546611325168	0.473859	27.1428339131704	0.474933	41.7540968632611	0.463436	41.5340759417989	0.507232	71.1926024899034	0.511409	67.3872034365343
G0s2	chr1	-	0.45977	2.41989984112172	0.416149	2.91033583874611	0.236559	1.9522917001191	0.201835	2.13283901772204	0.258741	2.68710027124819	0.151685	2.82483330332508	0.206897	1.08655389454943	0.727273	0.89567464262393	0.449275	1.90669598563514	0.527473	1.89230223243995
Gas5	chr1	+	0.509366	57.6395004271989	0.504633	58.3895214034614	0.496398	48.9248265052333	0.478491	52.789212352241	0.488269	41.6086445155699	0.496252	43.1883955518472	0.48442	44.8280280839299	0.495003	45.9572803032409	0.505092	74.7206399280458	0.505656	75.8877434267869
Gbx2	chr1	-	0.554717	3.87272900618653	0.605714	3.71258515188785	0.489328	26.083873693653	0.466568	29.4370749476698	0.480909	29.2191477753828	0.446226	26.5828827724871	0.474692	19.5845665333376	0.444167	18.8368582611504	0.376	2.01968606868639	0.397129	1.97926195770917
Gigyf2	chr1	+	0.507221	12.1762488075266	0.490285	11.6790934028875	0.499332	10.3041026495484	0.509696	10.1480697232666	0.517371	9.7305243345267	0.485561	9.80160595081528	0.493276	8.93532481115341	0.51098	9.16805182231905	0.493706	13.0322825409574	0.485681	13.6137760388692
Gin1	chr1	+	0.507018	2.18069242644151	0.47971	2.16854583153752	0.447761	1.97236885417201	0.417863	2.10888945314211	0.418675	1.55155977777438	0.470696	1.52976677253357	0.39666	1.73188405951713	0.463801	1.69369715712764	0.447222	0.999334691794558	0.337838	0.992747985960118
Glb1l	chr1	-	0.47619	0.74275087355882	0.475	0.719615467850555	0.545455	0.399227196978786	0.351351	0.464507512773156	0.130435	0.3758840450513	0.512821	0.352963317594145	0.384615	0.453642761346966	0.321429	0.537071747475087	0.255319	0.597062284953633	0.414634	0.55624346583162
Gli2	chr1	-	0.486469	9.83490094873022	0.491337	9.01551113637728	0.36632	8.50121763451227	0.390537	7.51988814244516	0.355091	10.6313702910779	0.37604	10.720636789265	0.306228	8.38569968186674	0.280547	8.54019226542787	0.337165	5.61030057597226	0.321429	4.92062532166345
Glrx2	chr1	+	0.507545	2.09537956271105	0.561422	2.01166784790895	0.511831	2.06478876966489	0.508631	2.30395692637846	0.509312	2.13699166450161	0.57445	2.15928439230309	0.444944	2.49786804698383	0.367442	2.48629666837893	0.505907	3.42020977372864	0.511536	3.36193821848761
Gls	chr1	-	0.469559	7.77011797202341	0.457229	8.03624865001831	0.438146	6.27382161785409	0.46904	7.04993575049587	0.474533	5.90892004145571	0.46036	6.78277021513436	0.472516	5.62700579768606	0.490656	5.31523082456284	0.498638	6.59337139636568	0.497713	7.69217203908492
Glul	chr1	+	0.559843	28.5009003784709	0.547263	28.9545839416096	0.610977	73.7109621423283	0.619936	70.0980983093547	0.588866	64.7910751563975	0.572174	61.8560215329726	0.592371	65.5907524442834	0.603821	68.8481398366865	0.560023	32.472692010111	0.575997	32.0590661774539
Gm10138	chr1	-	NA	0.0490616655318356	NA	0.0430738862898765	NA	0.0589054427153578	NA	0.100865103839232	0.317073	0.158463564717136	0.625	0.160927871739239	NA	0.0733472623689655	NA	0.0775491594796583	NA	0.114914321871139	NA	0.0745377478523531
Gm10522	chr1	+	0.6	0.639643749415919	0.628788	0.789718779377379	NA	0.110766699940315	NA	0.139364962159116	NA	0.160617044782079	NA	0.209810462300788	NA	0.248261975293964	1	0.306231726199751	NA	0.0468187757351172	NA	0.0506140291258813
Gm10535	chr1	+	0.9	0.694447470478125	NA	0.535340147419099	1	0.689864691748495	1	0.817560912943513	NA	0.55240698564781	0.978873	1.01115075850088	NA	0.85899849338659	0.973684	0.852603949426714	0.912281	1.94890189605801	0.898058	1.68550801735855
Gm11582	chr1	-	NA	1.31339279761778	0	1.24534635988596	0	1.52839271900696	0	1.00376387510755	0	1.583030704081	0	1.80939298049864	0	2.65075763027503	0	2.58702782738725	0	2.07649205770963	0	1.59631500673627
Gm1305	chr1	-	NA	0.0853762439042932	NA	0.0994158783479075	NA	0.112051323888594	NA	0.119291832252486	NA	0.146550418053855	NA	0.159182814504374	NA	0.1627767099053	NA	0.142598647358641	NA	0.418362208978963	0.221311	0.42667523828211
Gm15443	chr1	-	0.821429	7.38991669469382	0.75	6.61577597730472	1	7.90210988187621	0.702128	7.98243543811463	0.695652	6.96806054536659	0.732558	8.257640856645	0.68	6.74873940766082	0.653061	6.39080004350906	0.761905	6.47426588724912	0.767857	8.34147593230374
Gm15455	chr1	-	NA	0.690956586372876	0.166667	0.656116192605799	NA	0.357698033405226	NA	0.380324093056828	NA	0.348078112438892	NA	0.318093557105744	NA	0.301111904332557	NA	0.25866905795933	NA	0.138414757594689	NA	0.193374490941165
Gm15675	chr1	-	0.388889	1.09046212118432	0.410891	0.988055975019541	0.548673	0.832913826223297	0.434146	0.900960565975376	0.417647	0.880599881890466	0.402174	1.06614702883212	0.361446	0.83666736145433	0.397959	0.93527822417269	0.301053	2.35566425201186	0.344523	2.41149379888854
Gm15832	chr1	-	0.484252	1.1082110188633	0.609477	1.14972478712906	0.512681	0.780524322892745	0.531157	1.01402990416807	0.568513	1.34352259087686	0.53986	1.30973112187893	0.562753	0.980640825263543	0.569231	1.16642193527394	0.602911	1.44150461502574	0.661871	1.471602896835
Gm15834	chr1	+	NA	0.0906514179638272	NA	0.0636702211726788	NA	0.111630565017839	NA	0.0999369031907229	0.235294	0.273750212233398	0.422222	0.286334161930027	0.7	0.427421857594674	0.428571	0.429863592635619	0.21875	0.244766551285481	0.175	0.262695144495676
Gm16236	chr1	-	NA	0.490702955521579	NA	0.452355362034212	NA	0.407878644951725	NA	0.493448704052318	0.6	0.521862054239958	0.487179	1.26082340367451	NA	0.423231716896629	NA	0.581721003695696	0.68	1.07751127005161	0.471698	0.931885739420579
Gm16586	chr1	-	0.610407	19.0790203744856	0.617718	19.4728457771006	0.619473	11.5402747860734	0.637524	11.6366169942293	0.604025	15.1211177507866	0.620444	18.963117284363	0.55479	19.1938950228551	0.557495	18.6103769924457	0.592955	20.7488399988716	0.560491	24.1253687026586
Gm17971	chr1	+	NA	0.384566625605207	NA	0.516576674510179	NA	0.367605267581078	NA	0.262968569082637	0.6	0.490783420736834	0.242857	0.403655198768926	0.846154	0.358224165343524	NA	0.31562167455717	NA	0.168890310731828	NA	0.321342568043374
Gm19705	chr1	+	0.753425	3.55121854893753	0.810345	3.17544670884057	0.763441	7.54078080179042	0.674877	7.9384220096338	0.720395	12.1941059543915	0.670886	12.7055687908075	0.677612	15.3506795679974	0.679856	16.2191995653696	0.759644	13.8921494746641	0.78803	13.5485699308095
Gm20045	chr1	-	0.6	0.364038477058916	0.559633	0.364500694779841	NA	0.194029414570006	NA	0.172139304648363	NA	0.277805533804804	0.266667	0.342730550469887	NA	0.399789673262172	0.7	0.395324117627163	NA	0.295341517741299	0.6	0.280757662225648
Gm20342	chr1	+	0.534202	0.940724347429528	0.544715	0.777337852176413	0.550847	0.458562742001882	0.536842	0.418158855833197	0.542936	0.569753098723707	0.45938	0.681988332097017	0.5	0.485175074968352	0.529762	0.530417593873087	0.75	0.352918197462583	0.557377	0.364569935759123
Gm21710	chr1	+	0.8	1.05280166063851	0.748355	0.973142994202945	0.776445	1.54546379159996	0.766598	1.66514376917827	0.819767	1.1689463271687	0.804348	1.15457829692735	0.833622	1.14310536159094	0.762411	1.29554026776959	0.742007	1.43418655921276	0.797086	1.44859141857124
Gm21972	chr1	+	0.507263	0	0.515552	0	0.504716	0.0166007309317766	0.503403	0	0.536056	0	0.532232	0	0.524682	0	0.519121	0	0.509337	0	0.506505	0
Gm23966	chr1	-	NA	2.17262173063877	0.647059	3.09008839766094	NA	1.80591129014841	NA	1.39825838381928	0.7	2.36192706480255	0.714286	3.23065626958635	NA	1.798932568641	0.2	2.85298395917472	NA	2.41718338181982	NA	1.98047492658168
Gm24086	chr1	+	NA	0	NA	0.374874669557507	0.7	1.05160548596397	NA	1.14500240103568	NA	1.009110808964	NA	0.933710080315623	NA	0.654713553893152	NA	1.38444119560859	NA	0.972325646070381	NA	1.44157018465469
Gm25395	chr1	+	NA	0.854671048449808	NA	0.360173702123879	0.4	1.04193999436504	0.5	0.687562716308193	0.705882	1.05033265573541	0.285714	0.93447291534856	NA	0.294861802764379	NA	0.810559780884811	NA	0.400369383676039	NA	0.605954133990881
Gm25612	chr1	+	0.454545	1.4760033344657	0.642857	1.94379458289078	NA	1.22687306695797	NA	0.692655773466032	NA	0.610449748632543	0.785714	0.88760094054695	NA	0.763832479542011	NA	1.61518139487669	NA	0.972325646070381	NA	0.84091594104857
Gm25663	chr1	+	NA	0	0.6	0	0.416667	0	0.2	0	0.692308	0	NA	0	0.3	0	NA	0	0.5	0	0.384615	0
Gm26004	chr1	-	0.717949	0.267207500204998	0.686275	0.211136308141584	0.55	0.111053165543609	0.654545	0.107481068296453	0.888889	0.37889984397882	0.543478	0.0876471148188994	0.777778	0.138280017848123	0.705882	0.146201764191425	NA	0.469398587758115	0.529412	0.202979709908276
Gm26457	chr1	+	0.407895	8.345095775633	0.344	12.8739010451458	0.483871	9.24873542783697	0.495868	11.1890548021436	0.336634	7.74801604033612	0.518182	8.47255443249361	0.430556	8.22588824122166	0.358696	11.0888414994419	0.485437	10.2966792776171	0.413534	11.1690886529015
Gm26616	chr1	-	NA	0.119714464205136	NA	0.0985348074687149	NA	0.128531439747286	NA	0.120384331403816	NA	0.141462445772588	0.181818	0.173432398425038	NA	0.11874190139002	NA	0.13646125399264	NA	0.12267513783701	NA	0.140197765517592
Gm26620	chr1	+	0.8	0.417327748178185	0.716981	0.509621541805636	0.75	0.946058790922299	0.776316	1.11401430395883	0.892562	1.26423619912639	0.775862	1.21955006274327	0.758824	1.57067143896032	0.886486	1.47382831074734	0.699454	1.14965308947857	0.56875	1.03750706068171
Gm26641	chr1	-	NA	0.0324906394379242	NA	0.077018275925861	NA	0.108026559354789	NA	0.0522759074313986	0.839286	0.230358395710394	NA	0.159859517594219	0.606061	0.269022760090268	0.775	0.373320228061123	0.840164	0.699177561010777	0.784861	0.715748159466917
Gm26685	chr1	+	NA	0.421350432849205	NA	0.278453618448713	0.652174	0.700463861758008	0.592593	0.542346389110328	0.684211	0.494274190934308	0.733333	0.412110408382289	NA	0.285446047718122	0.727273	0.402398132979661	NA	0.161493532911343	NA	0.192043086883064
Gm26788	chr1	-	NA	0.155563714046573	NA	0.135724176333591	NA	0.172408762232487	0.333333	0.169470358627197	NA	0.15165501910821	NA	0.14457558379161	NA	0.150945565279632	NA	0.177325435447567	NA	0.119558235024965	NA	0.152638025267704
Gm26901	chr1	-	1	0.150015549780911	0.979592	0.200382419204205	NA	0.139539492635113	NA	0.123557402319131	0.925	0.16967098337194	0.892857	0.246034076629222	0.962264	0.284654786683437	1	0.328322191814069	NA	0.160000117836887	NA	0.151942405573192
Gm27390	chr1	+	0.382166	0	0.519856	0	0.521212	0	0.50625	0	0.457265	0	0.48583	0	0.425414	0	0.529412	0	0.440789	0	0.44186	0
Gm28040	chr1	+	0.923077	0	0.741379	0	0.833333	0	0.903226	0	0.763158	0	0.603175	0	NA	0	NA	0	NA	0	NA	0
Gm28062	chr1	-	0.49004	0	0.492118	0	0.536658	0	0.533772	0	0.530341	0	0.515129	0	0.49426	0	0.44983	0	0.451573	0	0.485961	0
Gm28151	chr1	-	NA	0.537786703882614	NA	0.540828650507781	NA	0.41992343143514	NA	0.458857136996425	NA	0.693255235040112	0.391304	0.855273633564024	0.3	0.725279420637683	NA	0.873828420256634	0.8	1.01628989715453	0.510638	1.11414730359747
Gm28177	chr1	+	0.310937	0	0.342497	0.00346713076789691	0.332869	0	0.320917	0.00352995581041579	0.352439	0	0.376128	0	0.378788	0	0.414634	0	0.508591	0	0.410959	0
Gm28306	chr1	-	0.173913	0	0.375	0.0231491604389639	0.555556	0	0.583333	0	0.423729	0	0.479452	0	0.460317	0	0.6	0	0.5	0	0.416667	0
Gm28417	chr1	-	NA	0.038600336268717	NA	0.0508339803744786	NA	0.133687912028421	NA	0.134563263587423	0.12766	0.305604980012805	NA	0.240565680025971	0.447368	0.645880764145736	0.258065	0.535041408514571	0.187773	0.841955706808972	0.227545	0.801470735013498
Gm28551	chr1	-	0.581885	0	0.587544	0	0.617207	0	0.598515	0	0.627022	0	0.612802	0	0.585472	0	0.605514	0	0.591356	0	0.59343	0
Gm28778	chr1	+	0.508791	0	0.518448	0	0.555911	0	0.480323	0	0.468562	0	0.53286	0	0.48801	0	0.52431	0	0.537113	0	0.527831	0
Gm28836	chr1	-	0.38843	5.06807780009668	0.425287	5.24271799584427	0.628931	3.80563233328905	0.547297	3.24990149635721	0.591304	2.70796665744104	0.69	2.47350404285122	0.581633	2.50870098731097	0.45283	2.03620024188247	0.385542	1.24728029164163	0.25	0.892725927937819
Gm28845	chr1	-	0.644118	0	0.65609	0	0.661749	0	0.571882	0	0.562937	0	0.610573	0	0.564369	0	0.619458	0	0.590022	0	0.582834	0
Gm28888	chr1	+	0.0414508	14.6152355491873	0.0669456	13.9122791396331	0.0227273	15.5319800771055	0.0374532	14.5983780103917	0.0777202	11.5444547399623	0.0557621	12.6444831340633	0.0107527	7.96948001598105	0.0813008	9.92876537831638	0.038674	10.209419283739	0.0242718	9.8355231585934
Gm28941	chr1	+	0.555556	0.868621431344859	NA	0.71043111746362	0.545455	0.671342046963725	0.4	0.882676383885917	0.583333	0.594243118137874	0.625	0.659809548725166	NA	0.55203232297284	0.4	0.700388392468655	0.536585	1.39204143626202	0.631579	1.27336337189262
Gm29170	chr1	+	0.531646	0.760950982580517	0.5	0.708164769478702	0.489655	0.769556633243274	0.509434	0.727798701416027	0.349315	0.647416427354972	0.417219	0.654508296585431	0.418919	0.875094493746985	0.519231	0.814199459283178	0.513514	0.664661229965187	0.428571	0.867065536596725
Gm29247	chr1	-	0.600592	0	0.542986	0	0.571429	0	0.50823	0	0.529762	0	0.541741	0	0.485714	0	0.477419	0	0.487973	0	0.611825	0
Gm29253	chr1	-	0.530075	0	0.477828	0	0.518653	0	0.508424	0	0.516887	0	0.485609	0	0.513543	0.0030664274651849	0.480415	0	0.482543	0	0.443621	0
Gm29283	chr1	+	0.222222	2.47538059217685	0.116279	2.46618937704267	NA	0.984054439122535	0	1.38531154693206	0.285714	1.06828706010695	0.178571	0.988464683790922	NA	0.445568946399507	0.181818	1.00107596869962	NA	1.32344324048468	NA	0.776679306662916
Gm29427	chr1	-	0.569966	0	0.489231	0.0128296551830402	0.389423	0	0.44958	0	0.456349	0	0.479452	0.00532585925562721	0.50463	0	0.419512	0.00888392071566542	0.501493	0.00713072762964135	0.47973	0.024668042272771
Gm29630	chr1	-	0.488889	2.84922092140594	0.603774	2.59244803979973	0.666667	1.72240675695492	0.673469	1.77119220067359	0.614035	1.74462797241501	0.877551	2.40724387775585	NA	0.491491094078564	NA	0.850332266383552	NA	0.189589958843807	NA	0.196760275899944
Gm32391	chr1	+	0.8	0.602701361573495	NA	0.47622967280824	NA	0.214702786717644	NA	0.230885257822011	0.8	0.610449748632543	NA	0.489525367210742	NA	0.297045964266338	NA	0.376875658804562	0.485714	1.31083901914674	NA	0.915664024697332
Gm33222	chr1	-	0.714286	2.11799690044224	0.651007	2.10803373095895	0.735849	1.43887544318001	0.806122	1.34344273539535	0.774648	1.06848760207431	0.765217	1.16233204041042	0.733333	0.800970195367313	0.933333	1.49314075071715	0.776316	1.39524258279744	0.763359	1.42325851783253
Gm35048	chr1	+	0.98	0.779879706165764	1	0.725489070230969	1	0.487333948438335	1	0.449410491135348	1	0.43136706006154	0.9	0.478962391901138	1	0.303406691552555	NA	0.338945988646501	NA	0.0825886879959852	NA	0.100837885864497
Gm37121	chr1	+	NA	0.212218789286442	NA	0.143731289579952	0.333333	0.524157037996126	0	0.482907898402374	0.343284	0.653439167550328	0.290909	0.879077243934783	NA	0.2824028533518	NA	0.318486472229207	NA	0.170423274428611	NA	0.110542940607324
Gm37144	chr1	-	NA	0.579491743922838	0.6	0.670862669521173	0.540541	1.18739975958627	0.307692	1.21425568635437	0.387097	0.840828175507781	0.615385	0.866410783705434	0.393939	1.21349733923761	0.36	1.16503736265236	0.459459	1.2665598415769	0.481481	1.4025015434184
Gm37154	chr1	+	0.418605	1.06924427601411	0.731707	0.768928973371444	0.653061	0.92871437975539	0.62	0.831186928159238	0.532258	0.91993357468346	0.606742	1.14280966763867	0.508772	1.11910340025923	0.56	1.03859919926373	0.616162	1.43512250396745	0.604167	1.31417561019684
Gm37214	chr1	+	NA	5.29572593746891	NA	5.21386822070157	NA	10.8288960113048	0.2	10.0994656227209	NA	8.58894799167709	0.238095	8.66864412023255	0.421053	10.5243774282748	0.166667	9.86829986509543	NA	9.37721043382723	0.4	10.127712512716
Gm37218	chr1	+	NA	0.119215653937614	NA	0.125599034586789	0.916667	0.429405573435288	NA	0.415593464079619	0.8	0.450793660528647	0.571429	0.469249168568877	NA	0.205647206030541	NA	0.304399570572915	NA	0.174519987756222	NA	0.181120356533538
Gm37258	chr1	-	NA	0.190510571750336	NA	0.127953534005902	NA	0.118766138934161	NA	0.25288108754691	NA	0.141825448668163	0.583333	0.399933731048254	NA	0.167601840932082	NA	0.375254190081985	0.7	0.468533071001339	NA	0.246020889944142
Gm37285	chr1	-	0.416667	1.27903010633683	0.351852	1.02138811050055	0.574074	1.44768867602415	0.657143	1.75140353606863	0.410526	1.1769514029825	0.666667	1.50854612722538	0.534483	0.985806624167477	0.48	1.29540667622464	0.61194	0.980008640639857	0.480519	0.961257730680631
Gm37309	chr1	+	0.631579	0.709184030440353	0.8	0.791986590881306	0.592593	0.707379529149041	NA	0.464024429082186	0.95	0.536331688853485	0.54	0.533476276652435	NA	0.489337464014101	0.636364	0.455286030770612	0.581081	0.905289161625016	0.808081	0.754207707956924
Gm37509	chr1	+	NA	0.249416151974245	NA	0.220264005905989	NA	0.199187817276703	NA	0.188846509395598	NA	0.162966389190007	NA	0.18608071584145	NA	0.151850571824382	NA	0.160549744205162	NA	0.214776886162596	0.333333	0.234044764911593
Gm37516	chr1	+	NA	0.118971609610209	NA	0.162944499834959	0.303571	0.731791483899442	0.272727	0.8294854196062	0.18254	0.511728090204762	0.202899	0.692026452111556	0.3	0.361198163304411	0.2	0.425287015181197	NA	0.327425934040077	0.0175439	0.265099395949805
Gm37559	chr1	-	NA	0.279411688916284	NA	0.441559105969179	NA	0.433534473179858	0.4	0.554457626356222	NA	0.290550601512605	NA	0.488801217259247	NA	0.154235404522906	NA	0.305758497227259	0.411765	1.12892617079806	0.636364	1.01880200550115
Gm37570	chr1	-	NA	0.0648662122197579	NA	0.0827958864508853	NA	0.141015352512554	NA	0.0923243690324975	NA	0.102593293234445	NA	0.124387792054639	NA	0.072300949447956	NA	0.109204150973633	NA	0.328699912547939	0.75	0.246372667853895
Gm37599	chr1	+	1	0.507093170123186	NA	0.175299266064383	1	0.3424707027398	NA	0.254965315386269	NA	0.292117057627843	1	0.311873169294243	1	0.328026218208226	NA	0.208090854554666	NA	0.250537896533472	1	0.337054242219877
Gm37607	chr1	-	0.413793	1.05762419638898	0.532468	0.999094112334481	0.453416	1.15414002772351	0.437158	1.28338050287644	0.491071	1.42430517027494	0.538813	1.5659528741414	0.409524	1.31479361232641	0.356164	1.33192426882131	0.283951	1.01717940252273	0.306931	1.01884516227692
Gm37691	chr1	+	NA	0.0783033249726266	NA	0.0856689878351395	NA	0.190253538171873	NA	0.135677617499759	0.103448	0.328831461952858	0.102041	0.359581400710572	NA	0.0685757103669664	NA	0.131825920296971	0.25	0.433824268048503	0.322034	0.393495061415654
Gm37738	chr1	-	NA	0.197176017962975	NA	0.176573706384735	NA	0.193942720826371	NA	0.198279324465467	NA	0.165427221957674	0.928571	0.286730213618741	0.5	0.217682538698996	NA	0.255326066556526	NA	0.30596506759297	NA	0.297066572897989
Gm37785	chr1	+	0.2	0.44408821255	0.296296	0.411926235734702	NA	0.347732918687214	NA	0.331370203917304	0.269231	0.465442582429132	0.262411	0.557330823134131	NA	0.439647764387553	NA	0.401447701342899	0.25	0.491815879116995	0.2	0.498682709226478
Gm37886	chr1	-	NA	0.0717027396452274	NA	0.0404689552948179	NA	0.315029865507713	0.592593	0.37906079341036	NA	0.174298936820396	0.545455	0.208313962252982	NA	0.0848141814693046	NA	0.0896729921808607	NA	0.206932490439301	NA	0.0933733497000395
Gm37893	chr1	+	0.492958	0.826731453239919	0.49537	1.00499843021846	0.442857	0.777053171460657	0.6	0.695782245976547	0.759259	0.725926701492454	0.64	0.713405075727406	0.6875	0.559475164539389	NA	0.584567086697269	0.625	0.569750111854125	0.584416	0.623181858651505
Gm37902	chr1	-	0.5	0.386760232025772	NA	0.31287816548135	0.310345	0.451603009495223	0.3	0.333363741240336	NA	0.359088087430908	0.731707	0.434954666053148	NA	0.200148617634003	NA	0.382921792368271	NA	0.137500596413993	NA	0.230839670091764
Gm37912	chr1	-	0.407186	0.770871052281908	0.602469	0.843996113429428	0.55627	0.741269049070669	0.45	0.632307351070422	0.570312	0.467958552430279	0.518152	0.57512007981296	0.702128	0.557975156544506	0.272727	0.512751830980849	0.445087	0.504496661615191	0.494083	0.658298304956098
Gm37914	chr1	+	NA	0.109915141928297	NA	0.182842939488046	NA	0.1490657645744	NA	0.121001456506944	0.4	0.200976736951812	0.363636	0.239091121723224	NA	0.173637170601375	NA	0.259550425716468	NA	0.218491989150567	NA	0.237302146858051
Gm37988	chr1	+	0.520718	0	0.517622	0	0.538695	0	0.512385	0	0.487395	0	0.483841	0	0.520657	0	0.521283	0	0.473684	0	0.511742	0
Gm38037	chr1	-	NA	0.343552500263568	0.666667	0.346866791946889	NA	0.182444486250215	NA	0.353152081545489	0.52381	0.324771294838988	0.708333	0.331806934671548	NA	0.325945756356289	NA	0.323732477852441	NA	0.134113882216604	NA	0.166733333138941
Gm38067	chr1	+	0.62	1.30569525741197	0.757576	0.839462935248434	0.666667	0.84937366174013	0.637931	0.926440689157078	0.433333	0.695740215866917	0.647059	0.904448510847042	0.8	0.553988391755744	0.666667	0.745468336096936	0.553846	0.904654630409805	0.678571	0.696142866948633
Gm38157	chr1	+	NA	0.1551628947009	NA	0.223570719692914	NA	0.265533481806274	1	0.345104113281662	NA	0.27826154619646	NA	0.329321903736501	NA	0.31174081762227	NA	0.309623995307635	NA	0.232487757540974	NA	0.235733797372862
Gm38190	chr1	-	0.9375	0.599713657663036	0.956522	0.427512171353769	NA	0.314265277719201	0.73913	0.39068407664267	0.84375	0.466791858260342	0.853659	0.551651493648796	0.833333	0.46215479361564	0.8	0.431564240208378	0.785714	0.658441341818428	0.86	0.653633084777185
Gm38228	chr1	+	0.545455	0.851013523468043	0.692308	0.662964741728409	0.608696	0.836892532913322	0.653846	0.906398738363902	0.5	0.739338210640806	0.657143	0.904263350103727	0.62069	0.955233657710311	0.5	0.878793589555881	0.448276	0.947509910323805	0.657143	0.946924679169929
Gm38248	chr1	-	0.642729	1.13093044700286	0.651252	0.955023957870926	0.601227	0.997961422612877	0.597671	1.09521777495649	0.588689	1.08493904832185	0.647198	1.43108960222372	0.602305	1.0484700367637	0.597663	1.24636814363432	0.696581	1.46176710477882	0.63047	1.61028931889536
Gm38319	chr1	-	0.376344	2.52179716623168	0.333333	1.81850734911203	0.310924	1.50597215328016	0.322917	1.37874608936366	0.324607	1.87474614745918	0.302885	1.91937489039429	0.283784	1.24168028664886	0.322581	1.39318963918274	0.295455	2.36553158759619	0.32948	1.93423951053194
Gm38372	chr1	+	0.540943	2.03151998169758	0.446701	1.72075042792252	0.581333	1.98605407971684	0.505051	2.16050822686872	0.529551	1.57674259800719	0.464223	2.0596636793192	0.560976	1.4336081294284	0.482014	1.97466752211278	0.474645	2.31832559703573	0.545455	2.59539895211416
Gm38387	chr1	-	NA	0.0481118665483581	NA	0.133056020342232	NA	0.124972518461958	NA	0.101600264792456	NA	0.0895421051544825	NA	0.0710155901210175	NA	0.0809182254229604	NA	0.0789727806575333	0.333333	0.338068986759434	0.5	0.333494796954458
Gm38394	chr1	-	0.52576	0.470007363495675	0.527719	0.463019678508209	0.517744	0.429997507073344	0.525388	0.424759763405518	0.527781	0.393823035943326	0.536657	0.482525155942724	0.534831	0.366422985459697	0.524072	0.308929682901534	0.538936	0.507991323163592	0.544725	0.557574630466825
Gm38399	chr1	-	0.339506	0.527592681255825	0.401235	0.44665918074937	0.577982	0.36806192008739	0.552239	0.30316848443498	0.442708	0.46757853086748	0.477157	0.451182837864098	0.588235	0.399793170143265	0.5	0.298980385860154	0.343234	0.910262306959505	0.512	0.858807769581518
Gm43543	chr1	-	0.477011	0	0.467249	0	0.4	0	0.45509	0	0.42029	0	0.450704	0	0.4	0	0.418919	0	0.513986	0	0.449036	0
Gm5250	chr1	+	0.12963	1.54497545289868	0.212121	1.25892490275076	NA	0.240788172019788	NA	0.310724085293173	NA	0.136923308104496	NA	0.158365503411096	NA	0.0999406982578332	NA	0	NA	0.0848134519936781	NA	0.0733509232067289
Gm5251	chr1	+	0.75	0.722366038689782	0.863636	0.778341474928722	0.565217	1.88319817163357	0.559322	2.21884646076407	0.670886	1.60631056737631	0.742857	1.07701963124919	0.539683	2.27693283626189	0.775	1.29351391369362	NA	0.230721339745514	NA	0.399078751684067
Gm5835	chr1	-	1	2.57487038386517	1	2.64203008581579	1	2.78944565420561	0.993902	2.20886289963577	1	2.49178858024496	1	2.64183587028935	1	2.43764806266439	1	2.35027969900168	1	3.18340947744932	0.996466	3.76359544009455
Gm5837	chr1	-	0.993671	4.52827903926658	0.989011	4.82143408701403	1	4.78023443327523	0.988304	4.46254486630416	1	4.55897606283354	1	4.46340851476581	1	4.63990569749552	1	4.99243248533289	1	4.3253931224022	0.993865	3.63762176982442
Gm6123	chr1	+	1	2.14565872942909	1	2.24527366787047	NA	2.59089424570403	NA	2.68250224709951	1	2.84724270035721	1	3.02444038488266	1	2.94100513170713	1	3.20467702388538	NA	2.30483927702745	1	2.84133618247655
Gm6189	chr1	-	NA	0.320084296595228	NA	0.252917364315615	NA	0.327932210260378	0.416667	0.413198112701638	NA	0.195273550715309	NA	0.156266133625242	NA	0.0693392596702402	NA	0.105894457445086	NA	0.11114961756232	NA	0.0961277588710662
Gm7160	chr1	-	NA	0.284367614897062	0.222222	0.51852812444087	NA	0.36364621603553	NA	0.351949299149995	0.390244	0.52730451116883	0.810811	0.408978633156361	NA	0.316960831313128	NA	0.418898491614104	0.24	0.605216104328917	0.363636	0.540037760306421
Gm7241	chr1	+	0.355932	1.69306264835772	0.5	1.47499706584065	0.49697	2.16507011816112	0.251232	2.54943889729514	0.562724	2.67777116627048	0.37	2.84791745630037	0.603352	2.78574198421204	0.22093	2.28025608688474	0.885714	0.68634751487321	0.333333	0.461679340183529
Gm7694	chr1	-	NA	0.0485958767030777	NA	0.0735970303268548	NA	0.0875192963886921	NA	0.0456099437976065	NA	0.180885815246748	NA	0.209876707656231	NA	0.297589293701892	NA	0.36781567432324	0.515385	1.73224882542667	0.607465	1.52274561574774
Gm8292	chr1	+	NA	36.396900406711	NA	38.1911458388426	NA	37.1175575219442	1	34.9161478533559	NA	33.4914930272491	NA	32.8889158424979	NA	29.8936256766214	NA	27.623272719198	NA	30.0438803164575	NA	29.4915166396024
Gm8550	chr1	+	NA	0.332270275905755	NA	0.300052823821425	0.957447	0.611557707955311	NA	0.400955409448943	0.904762	0.403850369692586	0.878049	0.420384017783757	NA	0.270207201798169	NA	0.311658278337616	NA	0.166769482940096	NA	0.126201779820459
Gm9530	chr1	-	NA	0.0755771289820901	0.0909091	0.130632948956847	NA	0.0903047380891035	NA	0.0760000239097139	NA	0.0535841291088608	NA	0.0650741760740137	NA	0.136889209988023	NA	0.10337948580436	NA	0.145211693561258	NA	0.114821804812484
Gm973	chr1	+	0.75	0.214525737164207	0.642857	0.190125362400596	0.772727	0.197594034914106	NA	0.18890612003619	0.503448	0.359692612830623	0.61157	0.414594133845928	0.702703	0.387059892831895	0.597015	0.491714874702922	0.461538	0.463427936061977	0.549296	0.493287016671963
Gmppa	chr1	+	0.518797	8.96880021982436	0.471392	8.81500698275294	0.513746	8.63831337290696	0.544651	7.81905699015767	0.462799	9.12998329687586	0.476463	9.36898252986058	0.512224	7.77578274894103	0.507042	8.03004796191933	0.502608	12.4587596770805	0.470655	11.3648297201921
Gorab	chr1	-	0.508865	3.95186321844337	0.563776	3.963298432898	0.533752	3.68190838448191	0.509162	3.93467297165398	0.530641	3.55236851971316	0.522639	3.5611437194369	0.519157	3.81488172532033	0.573896	3.76017623154044	0.517595	4.17674316056292	0.589242	4.43284935649071
Gpa33	chr1	+	0.55655	20.0310124296636	0.520802	20.441105462113	0.456268	25.5388260086896	0.469164	25.4084931868371	0.413433	35.8776144387778	0.408877	35.714505161391	0.402676	33.911989264043	0.396729	33.5600764443143	0.640739	33.5746669661691	0.63254	30.9047342127449
Gpatch2	chr1	+	0.523169	2.81360734533919	0.507034	2.77939352435418	0.551587	4.54497075579021	0.582227	4.49451026353674	0.563156	3.89102131552898	0.559683	4.15203682600182	0.544458	3.37342777534327	0.530794	3.35259443747863	0.551402	3.39073893962805	0.586463	3.37373199253583
Gpc1	chr1	+	0.66568	3.12424043658954	0.67381	3.11666493704482	0.553846	2.64435260089922	0.601881	2.22337267078842	0.539898	3.36522404557269	0.430075	3.53354295734702	0.466667	4.28450945783809	0.489066	4.45763766238697	0.467181	7.31421083014137	0.487827	6.97378321803102
Gpr161	chr1	+	0.593264	1.07297513296911	0.604167	1.05010137973434	0.563025	0.679080057960718	0.663102	0.598139401045358	0.602694	0.722859484017048	0.547337	0.683451101592705	0.577982	0.815617732392317	0.586207	0.830674660206263	0.5792	1.31198321160373	0.562121	1.32913516450711
Gpr39	chr1	+	NA	0.0205612404801192	NA	0.0406166032245834	0.292683	0.482814226847637	0.3	0.363902734716482	NA	0.196801710006909	NA	0.198957497121243	NA	0.164927012995638	NA	0.191250334318733	NA	0.0135448348706322	NA	0.0156190025534726
Gpr45	chr1	+	NA	0.0278356528259973	NA	0.0203026900340623	NA	0.0427151164511477	0.2	0.0689019282806774	0.461538	0.0546520360754197	NA	0.0814713717189217	NA	0.0576198582246391	NA	0.0749794071122643	NA	0.112842434747046	0.25	0.110604030930953
Gsta3	chr1	+	0.606667	3.62477061972378	0.56105	3.92410243418945	0.713379	3.55860972460183	0.687644	3.52450810697356	0.752821	2.78243669956822	0.764505	2.66581201619067	0.776623	2.45924517929893	0.794767	2.51814364567275	0.845953	0.780277901059242	0.841393	0.79406933475627
Gtf3c3	chr1	-	0.475936	22.4933917289317	0.476179	22.1793868792142	0.490728	20.6036205194909	0.499495	21.3382983272717	0.511628	18.0985645677826	0.516067	18.2924600592063	0.515394	17.6494157034317	0.521055	17.6412243659918	0.561648	18.2587949342483	0.558605	19.4747594729173
Gulp1	chr1	+	0.6	1.20421134206276	0.577778	1.34255274596895	0.323529	0.81584773664927	0.266667	0.962124304814445	0.455882	1.2777535185587	0.41	1.34460656294284	0.416667	1.13965106779991	0.238806	1.24104211753764	0.4	2.20597351207985	0.404255	2.60330390052131
H3f3a	chr1	-	NA	103.311387502204	NA	104.942939934583	0.382353	103.895560832887	0.692308	105.03342008704	NA	108.143681667852	0.45	109.371392732334	0.571429	111.62875436252	NA	114.596981680423	NA	120.003410074086	0.5	120.879746626323
Hdac4	chr1	-	0.464856	2.06741267052918	0.540613	1.8542093574315	0.529988	2.04774091995287	0.490013	1.81158204634901	0.516964	2.54637945878371	0.526358	2.66558961306394	0.55707	1.90086233055196	0.509466	1.93695704447067	0.467687	3.18024794078617	0.450257	2.72593499199094
Hdlbp	chr1	-	0.529136	56.05168298779	0.523611	55.6647820283158	0.525138	53.5474819410531	0.522979	51.1587477377232	0.516386	51.327607115499	0.522861	49.928194441942	0.538031	59.8655730132075	0.529158	60.0875302248547	0.523884	42.2939323472773	0.519906	42.253203174991
Hecw2	chr1	-	0.519347	2.8692971285626	0.515516	2.83943843580599	0.47966	4.06454414339187	0.465087	4.22366478748716	0.380101	3.3701805153902	0.444984	3.41676845623972	0.376442	2.91149554842035	0.395114	2.96563621835242	0.417996	3.1258313154199	0.387557	3.24896093327656
Hes6	chr1	-	0.704797	6.72038686356286	0.693683	8.10072091989238	0.68985	5.2939437123189	0.653291	5.47535194379233	0.741739	8.27753652515234	0.739612	7.87835094685191	0.808901	16.6260306415356	0.80069	15.064603905866	0.76447	73.9580572449618	0.796298	78.6916858772166
Hhat	chr1	-	0.705882	0.247291050462942	0.735043	0.269008424078097	NA	0.142196599727751	NA	0.096744708031649	NA	0.139302631163361	NA	0.142227798997926	NA	0.0753815004400477	NA	0.0796999344029319	NA	0.191914766863728	0.785714	0.186563864516787
Hibch	chr1	+	0.603306	1.95931586385668	0.574839	2.04536338383866	0.560322	2.48330934034865	0.552876	2.5022032628527	0.528234	2.79281515631195	0.563472	2.74354708640906	0.506623	2.75062896041049	0.53075	2.82703394828641	0.580531	4.27765512818156	0.537509	4.31741427531588
Hjurp	chr1	-	0.528226	16.1919213471959	0.588556	15.8325113611324	0.518672	15.2742825149218	0.385542	14.9206583970969	0.643357	14.911944237752	0.543605	14.727661057448	0.509804	15.6226709301502	0.557895	16.181767798906	0.610638	26.7185890653703	0.662366	24.1052475949695
Hmcn1	chr1	-	NA	0.179912067053226	0.5	0.168163777491089	NA	0.0650460993217533	NA	0.0741325701581313	NA	0.0487414928359333	NA	0.0561345213686048	NA	0.0340626536344297	NA	0.0504196353504286	0.6	0.258234568264079	0.181818	0.231112002296582
Hnrnpu	chr1	-	0.531036	25.9153993205851	0.528306	25.2695682397122	0.542302	22.8266998938002	0.543148	24.2523070605498	0.542934	24.017065029468	0.532629	26.4225674541912	0.522218	23.391996679266	0.504494	23.3123192563922	0.515091	16.7836061179716	0.530086	18.9884244752903
Hs6st1	chr1	+	0.518759	18.2721329425638	0.511887	18.1213774915211	0.516482	13.8444943813456	0.520796	13.144961804135	0.501079	15.3500243901907	0.491269	15.2157415654497	0.498957	14.0144377814491	0.47161	14.4317127952913	0.41109	19.6205560540135	0.404377	18.4579683444234
Hsd11b1	chr1	-	0	0.342699433337485	0	0.374492534318406	0.0173913	0.542438938919665	0	0.510326483767492	0	0.498871424782276	0.0151515	0.487904334291799	0	0.237720623484846	0	0.267297132744238	NA	0.0448308225428828	NA	0.0470802150010726
Hsd17b7	chr1	-	0.608619	4.32390318513542	0.610587	4.37627984148011	0.568088	3.3063556105029	0.640345	3.21221829113263	0.590674	2.93432095081325	0.59825	2.84653925173198	0.658602	3.37214679888717	0.635505	3.41248208692258	0.642424	5.840811972672	0.634315	6.05940565828454
Hspd1	chr1	-	0.291973	604.763594847009	0.289109	606.594133798778	0.289308	578.858866772413	0.294798	601.366259364778	0.295154	539.310864716011	0.289406	520.479088364509	0.286158	622.22134935016	0.291453	620.687249604666	0.275422	388.576217068758	0.284447	403.684848547988
Hspe1	chr1	+	0.497333	271.142012813172	0.499624	281.913381249502	0.507109	272.24721203696	0.484754	290.954897776338	0.498064	272.339275442516	0.505182	271.061962622633	0.510273	286.399869150827	0.508275	287.515985552255	0.507138	245.312351364956	0.516863	238.922817128478
Htr5b	chr1	-	0.75	0.392456700559485	0.545455	0.35440347743869	NA	0.219695874780845	0	0.251289071303956	NA	0.227144092514435	NA	0.241697676833926	NA	0.223820680051845	NA	0.148997353480873	NA	0.30953622634592	NA	0.231197561053147
Iars2	chr1	-	0.515901	12.4647111080433	0.496496	12.3864891472784	0.522331	12.2717685094753	0.520931	12.4088677642861	0.472612	12.9581614396277	0.475753	12.8321294864581	0.486984	12.6283817762885	0.473716	12.4012664025206	0.402285	14.4904427065246	0.398833	14.35396662367
Ica1l	chr1	-	NA	0.159147110839048	NA	0.155474533105005	NA	0.151526611985193	NA	0.10940754002096	NA	0.147711514979047	NA	0.144267543734768	NA	0.167712284529762	NA	0.189985862354802	0.2	0.137243873866544	NA	0.109903128964526
Idh1	chr1	-	0.591902	77.048332848717	0.576049	76.4805655086608	0.57231	51.7239236020319	0.559069	52.9892915171311	0.542044	39.372356540998	0.5498	38.7273094341263	0.499151	33.4297307673971	0.526174	33.2272132169789	0.491938	50.7118177630399	0.484334	52.4317613853214
Igfbp2	chr1	+	0.415501	167.11362495766	0.404481	176.262808669601	0.410311	232.151020765461	0.408476	230.16497582116	0.415631	285.648838251569	0.432129	291.883399317579	0.4712	227.432671607564	0.458005	226.964030343748	0.452918	258.763913410631	0.468319	248.319244850667
Igfbp5	chr1	-	0.598361	0.521245932800824	0.714286	0.477113215800463	NA	0.216633181403417	NA	0.176450771462376	0.380952	0.596423430731895	0.485795	0.550165872239845	0.441441	0.737125050187395	0.470149	0.717230899123567	0.575693	1.01992200636753	0.577821	0.870318596329989
Igsf8	chr1	+	0.311304	4.33422140738879	0.315259	4.52326252937556	0.399281	4.99532763116497	0.43061	4.48095310609135	0.407934	9.34735819815259	0.39597	9.85720076355439	0.3914	7.31768206392749	0.371779	7.07698369077801	0.314463	14.8232600986317	0.342569	14.137768293918
Igsf9	chr1	+	0.602837	1.72512912413051	0.536424	1.65760522619928	0.4791	3.36276778470647	0.503759	2.79450777570778	0.485955	5.77157525499316	0.464714	6.00613386811616	0.467337	9.5995443969302	0.470149	9.91607053270261	0.487179	10.7344045463632	0.483019	10.0083241174949
Ikbke	chr1	-	0.678261	0.374647552959857	0.5875	0.346274783479045	0.527273	0.434262456168754	0.545455	0.373287542586484	0.738028	0.464234239978042	0.680251	0.42052731913774	0.752809	0.31483314775534	0.775701	0.368600943740989	1	0.160005684050615	0.890625	0.160574101850259
Ikzf2	chr1	-	NA	0.0547162176429419	NA	0.0474524898174059	NA	0.0654480207509222	NA	0.0601220201200172	NA	0.0624484888810352	NA	0.0761676296178708	NA	0.194756563499862	NA	0.185468388019295	0.522388	0.658766742726406	0.390547	0.767418164404783
Il10	chr1	+	NA	0.0118305610777785	NA	0	NA	0	NA	0.00951740757434242	NA	0.0922664505566744	NA	0.100894541333512	NA	0.477541069270922	0.16129	0.64730552084753	0.390411	3.04464106884023	0.387387	3.19034521145908
Il17f	chr1	-	NA	0.137964703369939	NA	0.102957665592286	NA	0.0700810283054624	NA	0.0616607513471245	NA	0.119553956705483	NA	0.165931333099281	NA	0.103128717564277	NA	0.15936136907908	0.52381	0.552042453852026	0.2	0.407565589627893
Il1r1	chr1	+	NA	0.058455577602602	NA	0.0404155309313924	NA	0.0344172312512961	NA	0.0333101786391019	NA	0.0328105946931211	NA	0.0399460369283056	NA	0.0907523738069716	NA	0.0506410008294673	NA	0.121941830200246	0.470588	0.162817607947798
Il1r2	chr1	+	NA	0.0487359591568864	NA	0.0513455172839073	NA	0.0877715794757664	NA	0.0588103958603234	NA	0.0979023181769173	NA	0.101244361143005	NA	0.19336010881488	NA	0.177771537171963	0.541667	0.72771542064387	0.542857	0.832982771793395
Ildr2	chr1	+	NA	0.20285877848553	NA	0.184037368580084	0.923077	0.348166681163747	0.65	0.350567265785256	0.879518	0.384869663360379	0.761905	0.373363324646064	0.909091	0.270225064571947	NA	0.283650204966226	NA	0.16663052521434	NA	0.176927654061364
Ilkap	chr1	-	0.520228	11.2413752876019	0.494091	12.0497421532366	0.53895	10.2180905082576	0.542455	10.8812781172898	0.501275	9.88453945032003	0.513696	10.1377865131781	0.538938	8.48794407612019	0.538206	8.47054497718136	0.585995	9.5773026110237	0.570704	8.99277565754893
Imp4	chr1	+	0.469187	18.5095788198825	0.466362	18.2249661928429	0.45435	20.9747527732719	0.434755	20.0100016886037	0.433763	21.45074595493	0.430241	21.0437925104783	0.453139	24.3917350412009	0.444882	24.6548856975233	0.432499	13.2289945962724	0.444831	13.0790793646451
Ing5	chr1	+	0.553365	21.1873115567494	0.537777	21.4750047363614	0.554897	22.1113451442645	0.538269	21.2472048658341	0.548692	21.0490921783717	0.550626	20.1040870792762	0.559983	24.0556351962679	0.527297	24.4941285120706	0.546932	18.8198162478566	0.576265	17.9841138959374
Inhbb	chr1	-	0.666667	0.997993323914882	0.54386	1.03320333915959	0.433333	0.653947853316255	0.548387	0.72081780608874	0.419355	0.898673848515688	0.574468	0.927102548476857	NA	0.535311035016282	NA	0.474305323830418	NA	0.431890827514223	0.28125	0.450991816092324
Ino80d	chr1	-	0.541902	4.41851051826589	0.548185	3.80035818774622	0.548445	4.75126733684763	0.556357	4.53438677062198	0.51462	3.81137348844183	0.501135	4.60970482565502	0.535313	2.73031408808234	0.559108	3.13279354160129	0.558449	3.16086802642266	0.552893	2.75826885196872
Ino80dos	chr1	+	0.464286	0.73723291549615	0.606061	0.76111706636317	0.533333	0.653054309599501	0.615385	0.623390196119428	0.633333	0.728724387430098	0.526316	0.773120591965042	0.363636	0.506834676529439	NA	0.423985116155132	0.26087	0.37340005713675	0.565217	0.31884729431425
Inpp1	chr1	-	0.727273	0.321476268048489	0.903846	0.34311284254959	0.806667	0.731850675467883	0.878788	0.766210241050815	0.845455	0.501778353752137	0.9	0.498910171226094	0.835821	0.533855053426034	0.765625	0.624820171175984	0.818182	0.337153165200875	0.88	0.41186656926899
Inpp4a	chr1	+	0.517045	0.823617534087148	0.512121	0.758074273209998	0.405172	1.2662648227903	0.454175	1.1859237773486	0.368189	1.30435368452399	0.432099	1.42321295598487	0.428152	1.09644192451828	0.339888	1.22456469477751	0.379694	1.83082169883937	0.391892	1.66385909506404
Inpp5d	chr1	+	0.40952	22.3011056294479	0.422447	21.4520821494667	0.372611	15.5240112795607	0.399625	14.6769767563082	0.399522	17.8032586122503	0.407703	18.6770675058837	0.354476	13.7785251143904	0.373258	14.1484535998729	0.372873	28.1652119466685	0.372546	25.8407428956472
Insig2	chr1	-	0.497345	6.15369717287536	0.486486	6.09298167209391	0.463343	5.69738232764125	0.445013	6.13158914467022	0.458333	5.71393620171227	0.429047	5.58266442940351	0.553571	4.49392140929511	0.458244	4.80508326284653	0.488934	4.46827449216334	0.480274	4.54235043307549
Ints7	chr1	+	0.63086	15.8982438679149	0.625206	15.8114237590384	0.63429	15.9200986954045	0.630662	14.5852353031139	0.633587	14.8524700830703	0.631254	14.7025849619094	0.665446	13.0116603431971	0.660799	13.1592374621943	0.664715	9.81465693132772	0.676353	9.40828566043219
Ipo9	chr1	-	0.540365	23.9087261855961	0.547307	22.9478726826776	0.52272	22.2656673508471	0.528663	20.9679598092302	0.52917	21.8307151331088	0.534356	21.6307926791534	0.535025	19.8786637391121	0.512474	19.9030447821736	0.525271	19.9748968568526	0.53462	19.6175587432813
Iqca	chr1	-	0.496454	3.09037052757575	0.521519	3.27206225937422	0.351598	1.59947444785928	0.478723	1.71521315445822	0.409222	2.35478678799551	0.400538	2.37576569783258	0.474227	1.89601923652892	0.340659	1.85723800570562	0.200743	2.35946516349634	0.257261	1.90025703092674
Irf6	chr1	+	0.696356	0.506443073666227	0.69337	0.52489878048949	0.572816	0.524835783630059	0.625	0.486789345392452	0.640669	0.929534742436086	0.58169	0.854326891990585	0.601476	0.959842115684211	0.558442	0.904469592816437	0.567164	3.2928951714422	0.524096	3.15096639503388
Irs1	chr1	-	NA	0.113557343153611	NA	0.107138284096342	NA	0.131019417091476	NA	0.104989162513552	NA	0.0949321459487616	NA	0.115635913514349	NA	0.147353509832908	NA	0.17990619539391	0.367647	0.610361899436131	0.331579	0.638595832747296
Itm2c	chr1	+	0.368681	14.1541668615212	0.366989	14.5269577889948	0.462354	12.6856508025302	0.40261	12.2125417786544	0.471585	12.7260760523838	0.435121	12.8853573713604	0.458466	10.4124686904087	0.467354	9.91965177419554	0.471714	17.2247234483315	0.478056	16.1586842369453
Itpkb	chr1	+	NA	0.152565956821624	NA	0.131084914239485	0.533333	0.169907203863337	0.4	0.157292374821303	0.640449	0.265697042461302	0.508772	0.260419908772813	0.785714	0.277485162452374	0.8125	0.293381653537528	0.285714	0.317448571822271	0.590476	0.333055114183817
Ivns1abp	chr1	+	0.372325	11.2007877694026	0.418099	10.9052777224481	0.382924	17.9710380374592	0.358418	18.5170401585134	0.427247	25.4454773970939	0.405802	25.6636557702403	0.416463	26.1251788936566	0.441196	25.7714301698269	0.460588	24.0292348624819	0.467033	25.7355864100042
Jph1	chr1	-	0.391304	0.679085567747875	0.406977	0.671344179468999	0.451064	1.33254910843964	0.417969	1.32710517941391	0.450253	2.65138918433678	0.452135	2.80316446770137	0.43377	4.33908198462521	0.440367	4.19743568374468	0.524667	6.42225174631361	0.520558	6.57657509077761
Kansl1l	chr1	-	0.512195	0.544198708400694	0.636364	0.512696239247767	0.367647	0.616658364011961	0.38	0.656692553535172	0.525773	0.623274323183647	0.347826	0.739949981949472	0.465517	0.582502500154937	0.388889	0.600603165741964	0.535714	0.970282945133258	0.391753	1.08824415900403
Kansl3	chr1	-	0.491119	10.0454483835596	0.484713	10.2660723805609	0.488406	7.58179167335163	0.474359	6.97361147898655	0.532352	7.43350689160999	0.506884	7.78288699366945	0.450297	7.26365941276728	0.458601	7.35024924001955	0.476109	9.40078239594359	0.463072	8.82350571071758
Kcnj10	chr1	+	NA	0.22357069186747	NA	0.21968797292483	NA	0.455057136264879	0.636364	0.366632295849784	NA	0.331248300811519	NA	0.37230977125217	NA	0.216562824327336	NA	0.32620271559189	NA	0.19133613601237	NA	0.161122418148015
Kcnj9	chr1	-	NA	0.104814136041233	NA	0.159927875196797	0.581395	0.651919375714488	0.637931	0.648395586448846	0.472906	0.912257926594528	0.489083	1.00769653931244	0.398496	0.800527789893143	0.299107	0.878028878604844	0.307692	0.285711360552397	0.0909091	0.274552779260261
Kcnk2	chr1	-	NA	0.0595716498535115	NA	0.0619355951457207	NA	0.138125604240766	NA	0.121071128520059	NA	0.0511280995213176	NA	0.0493646707780328	NA	0.162254522257559	0.695652	0.223014627150181	NA	0.0413085951193162	NA	0.0547794725910661
Kcnt2	chr1	+	NA	0.0629361827894005	NA	0.0905788541671946	NA	0.0766017194090507	NA	0.0813707290076121	0.6	0.270917509907989	0.776119	0.343571605413374	NA	0.155868353693344	NA	0.157418694323008	0.794118	0.398801584784197	0.680556	0.450765093272736
Kctd18	chr1	-	0.525316	0.943763790903645	0.540541	1.10064952185301	0.437086	0.990019324863136	0.542088	1.08311223468218	0.592437	0.801259409520924	0.527961	0.854243520982166	0.559846	0.86427942397265	0.491409	0.773912553037349	0.462199	1.08602471375625	0.493107	1.19788226243564
Kctd3	chr1	-	0.370825	9.31712352111031	0.390404	9.10345788974984	0.433946	11.3117123256775	0.440617	11.0905019267796	0.486957	14.2619504687902	0.464155	14.1943688406008	0.514727	16.3877726158844	0.519462	16.8509178653463	0.533578	26.3962071873667	0.550352	25.3038216887697
Kdelc1	chr1	-	0.532757	9.63600863977772	0.560452	9.61986916438527	0.532216	9.96666577917166	0.519261	10.105975483199	0.535857	10.1431215813736	0.541166	9.94141304089029	0.527946	9.58216981447342	0.544515	9.26166924567697	0.499593	7.91051805708901	0.559805	7.93073896262437
Kdm5b	chr1	+	0.453906	33.1248849810154	0.461797	31.2919695628016	0.449023	35.1440772913887	0.454372	34.1898739032677	0.45257	39.6434289673115	0.446274	40.9433953903099	0.460929	28.1374569208034	0.456132	28.446315204822	0.448985	38.4670937627607	0.47004	35.3959831287539
Kdsr	chr1	-	0.373971	4.1679384695042	0.421236	4.28990000727786	0.439482	3.9846644595198	0.404987	4.01565207958115	0.400381	3.53906499661376	0.40411	3.54667971481235	0.433878	3.41601035867352	0.383792	3.3410880639695	0.425387	6.54311786180957	0.463141	6.76283447373295
Khdrbs2	chr1	+	0	0.141562072793475	0	0.121376192689303	0	0.151466546649509	0	0.155075201833227	0	0.164431707628939	0	0.137326020730729	0	0.151192960919938	0	0.133486714249599	NA	0.0912706806047991	NA	0.0995273167036399
Kif14	chr1	+	0.489197	6.290185285768	0.493379	6.19388886508188	0.473387	6.16249647529982	0.475616	6.22547614274896	0.478518	6.36180812568918	0.490711	6.19466588416303	0.476505	5.81502318732239	0.470519	5.97787085955739	0.481069	7.05466469911964	0.471892	7.11734106196621
Kif1a	chr1	-	0.45082	0.775732299094594	0.431925	0.724516617519932	0.351351	0.392125989889459	NA	0.303343139376442	0.4	0.274407957745433	0.25	0.280057426257345	NA	0.385109108656551	0.8	0.39081157544846	0.523077	7.04263906861138	0.493442	6.97662800994701
Kif21b	chr1	+	0.559259	1.23256696704869	0.568657	1.15282780986762	0.725275	0.744340586913434	0.675159	0.602719674186381	0.631426	1.61340305363306	0.6128	1.77489723682672	0.607038	0.961059743218896	0.599138	0.892233944371109	0.624867	3.74948688074284	0.601028	3.29975304838576
Kifap3	chr1	+	0.652116	17.1359130889191	0.669919	16.5618856586794	0.666667	17.1301999073574	0.6841	18.0211353304914	0.715396	16.3369864184138	0.679962	16.4771332761935	0.694979	14.0214283700973	0.708353	13.2014508250496	0.677057	14.1622187073202	0.687234	14.6045216700853
Kiss1	chr1	+	0.923077	0.188235243059391	0.741379	0.0495785662842587	0.833333	0.0869242051488437	0.903226	0.134605170552103	0.763158	0.0889724329990751	0.603175	0.137207359230666	NA	0.0432941486380087	NA	0.0228871857573621	NA	0.0183705250269708	NA	0.0158877505731174
Klf7	chr1	-	0.57672	1.41047176347294	0.61596	1.27414049537465	0.566845	2.58562254032612	0.545939	2.6772581045985	0.483989	3.18520981865506	0.537849	3.20104380969381	0.541485	2.60009289986026	0.514638	2.85542060763191	0.502119	5.35394955428152	0.550169	5.76406457488636
Klhdc9	chr1	-	NA	0.248684772334561	NA	0.172920365332902	NA	0.314199200074601	NA	0.232070804717117	0.363636	0.585373507353671	0.153846	0.535108700999597	NA	0.494186867380197	NA	0.304790327402919	0.230769	0.882457293673632	0.117647	0.868982455127213
Klhl12	chr1	+	0.520384	4.57256636331494	0.508847	4.44485008227015	0.523682	4.64074562251476	0.541317	4.72124387232178	0.491037	5.2582785982693	0.494316	5.18480180506051	0.519108	5.26893588323306	0.498886	5.17786474455008	0.488714	6.73878416610463	0.502569	6.80850414402291
Klhl20	chr1	-	0.53288	3.47188797106087	0.514238	3.44013966628884	0.536122	3.40329068943575	0.560377	3.20647810069058	0.522642	2.84303178642347	0.565292	2.91312893587692	0.538462	2.44471580087245	0.579545	2.51612246093775	0.493711	2.37030392960475	0.547511	2.42659264937749
Lactb2	chr1	-	0.495362	35.3712270825458	0.499294	35.8687571473854	0.507066	27.3753106375992	0.507443	28.7939098470406	0.527978	24.714792056989	0.516712	25.8162407596139	0.528305	20.9692591936293	0.517352	20.2131143417979	0.527727	21.7663805491542	0.529529	21.9728425524798
Lad1	chr1	+	0.45302	3.10872349356144	0.436134	3.37842932592199	0.530973	0.685785959927533	0.627219	0.711398223806877	0.369524	1.22161767343995	0.428246	0.995774338595426	0.407475	3.91576474071096	0.408524	3.62133169798383	0.428704	6.27779193604029	0.432569	5.90718715764825
Lamb3	chr1	+	NA	0.196889736993156	NA	0.16853863193758	NA	0.171450501190133	NA	0.17347821549603	0.434783	0.31741171140331	0.12069	0.332136435103198	NA	0.215910905061104	NA	0.246234550217137	0.682243	0.646452441035298	0.550336	0.607158605953701
Lamc1	chr1	-	0.529952	63.5696721413712	0.531283	60.6566128266608	0.566984	58.6004678051129	0.558119	52.7289231649954	0.548661	52.8523141652139	0.551959	52.7514840940319	0.528005	45.1371253810792	0.536991	45.3836292611702	0.513834	37.9068299808072	0.520414	34.8872357931492
Lamc2	chr1	-	0.266395	3.61858585860396	0.282851	3.69403181242864	0.202092	4.95480295955434	0.211163	4.33015406783293	0.222714	4.01033363910709	0.20693	3.9623604483646	0.20151	2.82140087666631	0.199357	3.02100602728772	0.532119	1.33602551144339	0.433359	1.35609332749766
Lancl1	chr1	-	0.369547	4.71964056168582	0.385783	4.71421875482789	0.436612	5.87703125641507	0.413306	5.90235974702615	0.47522	6.09204477398264	0.468094	6.07683257154401	0.476888	4.6768183917871	0.395232	4.77176313154923	0.46571	5.72627975562766	0.493718	5.71058259485788
Lax1	chr1	-	0.735	2.75192479639447	0.646429	2.78436577865363	0.646489	5.32805096531875	0.699752	4.84349073987984	0.637982	3.56910853466407	0.672922	3.54460267725805	0.583333	1.31991840336623	0.71875	1.52039703844283	0.625	0.448053047821085	0.9	0.448682736843585
Lbr	chr1	-	0.495125	63.8671386123249	0.502229	62.9425672335428	0.513705	57.6815879930275	0.531318	57.0098910712874	0.497877	55.1528077242793	0.484239	56.650264394503	0.475103	60.145911766533	0.469777	60.1362464266409	0.479575	80.7804307284122	0.493	79.5215753989779
Lct	chr1	-	NA	0.0532245972934088	NA	0.0573489191642767	NA	0.038208113777414	NA	0.050603013109913	NA	0.0514584552390842	NA	0.0825300338101157	NA	0.0851352467051196	NA	0.0741279004205039	NA	0.206122108548794	0	0.2095069999865
Lefty1	chr1	+	0.560776	39.9969197092971	0.573924	42.3452001121593	0.556849	10.2515084852554	0.502928	9.83665758836914	0.53427	13.5007316421122	0.52463	15.1175817655552	0.508692	19.8635548732777	0.553182	19.5737383544656	0.553527	34.7127998854774	0.560352	34.6019211283114
Lefty2	chr1	+	0.589999	150.267427943701	0.57239	154.272149312396	0.577598	38.3554070611175	0.578762	39.9342183848853	0.587696	37.3073406316717	0.586978	40.2710798655759	0.59949	25.0713164799808	0.60593	23.8964571786248	0.625888	23.0542842194275	0.577501	21.6428767669337
Lemd1	chr1	+	0.623762	0.300317181843059	0.575758	0.315079287701436	0.62549	0.596332425160428	0.659624	0.544937925771317	0.617916	0.554787036059417	0.720609	0.575721429410052	0.713948	0.670008294036851	0.662544	0.805156362253906	0.611111	0.784015404141151	0.596364	0.793388664802419
Lgr6	chr1	-	NA	0.0610782287725918	NA	0.0482614886220582	NA	0.0432476785389503	NA	0.0564154023637492	NA	0.0561353585810104	NA	0.051940926312178	NA	0.0772640356623287	0.8	0.0915921722244337	0.636364	0.361623959449326	0.775701	0.35055552877459
Lin9	chr1	+	0.540299	4.40936639418898	0.494245	4.59305994682492	0.51548	4.3711163701157	0.54195	4.62981675196373	0.544139	3.71781087937197	0.550964	3.89194811286109	0.554622	4.26476649193211	0.546841	4.17195735498865	0.55102	3.73011177585531	0.51819	3.98007232948527
Lman2l	chr1	-	0.567757	2.23235726492774	0.530435	2.07676186010605	0.526217	2.16365792403594	0.521459	2.06864908129317	0.520179	2.20239717708847	0.531044	2.41915088647311	0.534954	1.91378492428259	0.498599	2.00037549027126	0.500571	3.01884717508032	0.530106	2.92120873990565
Lmbrd1	chr1	+	0.43949	1.76043115822977	0.401028	1.8471592917984	0.395028	2.73854124937505	0.354115	2.75504996070231	0.408875	2.05381516100331	0.452135	1.96688360952989	0.439739	1.91086279697507	0.430518	1.94634778154436	0.359447	2.17435506893054	0.468691	2.14320690344426
Lmod1	chr1	+	NA	0.137393927410371	NA	0.111664795187342	0.5	0.117466570240656	NA	0.0978981564321291	NA	0.183691565697939	0.605263	0.203444316160181	NA	0.138139916512917	NA	0.154645027169045	0.452381	0.617185427824816	0.434109	0.554646684521397
Lmx1a	chr1	+	0.8	0.282944102101641	NA	0.205540822943486	0.909091	0.261740146351898	NA	0.238635823013916	NA	0.12618837560072	0.8	0.116759584052032	NA	0.193657174583531	NA	0.119854449796504	NA	0.168353203736568	NA	0.149066960103427
Lonrf2	chr1	-	0.862745	2.36001252579138	0.852257	2.15192510597488	0.913917	1.16018452295066	0.936376	1.13781583890703	0.972973	0.500656628374891	0.97493	0.563482437077113	NA	0.164550642075597	NA	0.214647407592526	NA	0.0743558381087661	NA	0.0752858396462349
Lpgat1	chr1	+	0.557091	8.84263705934636	0.547311	8.62684643639001	0.555021	6.93199404684956	0.549163	7.15301339358062	0.520643	7.55738393142827	0.530102	8.15636449046626	0.501426	5.77752448816264	0.516837	5.8655917252053	0.55054	6.22492844632706	0.524046	6.66456271176365
Lrrfip1	chr1	+	0.402615	3.30132821864032	0.405898	3.25598362964978	0.486007	2.75804630951248	0.45045	2.70209632078973	0.474543	5.6324817740577	0.457	5.77427701066283	0.492834	5.96093969658354	0.458098	5.81480282969289	0.466913	13.5830991861772	0.460547	14.380715524242
Lrrn2	chr1	+	0.844444	1.9744367275231	0.845041	2.01316561070298	0.87013	1.12875734880764	0.903226	0.96066249972229	0.887006	1.52213394902423	0.893827	1.29244752455619	0.870748	1.01284824199632	0.905028	1.12276448005476	NA	0.12495534032949	NA	0.117891970594848
Ly96	chr1	+	0.7	0.607170813394314	NA	0.383808998933184	0.9	0.492071029303905	1	0.42739778382331	0.529412	0.301338563477769	NA	0.258906658466014	NA	0.282790085471969	NA	0.282379901063163	NA	0.213321199529643	NA	0.230613578348286
Lypla1	chr1	+	0.612739	17.5976988175595	0.607824	16.5718213965594	0.57429	16.6882210820869	0.576125	18.9747935412251	0.574069	15.1019030886338	0.557341	15.2328109502887	0.553387	17.5783029546666	0.544727	17.3439285863992	0.530776	15.2433988689892	0.518661	15.6581019774645
Lyplal1	chr1	-	0.673077	4.08566702468072	0.547794	4.09748941731805	0.612335	3.74709426248664	0.587234	3.8714980494109	0.67624	4.90216680270696	0.673861	4.9095714658252	0.676471	4.23883461555728	0.612022	3.97653974594167	0.746154	4.44262858565744	0.748366	4.83446731127543
Mael	chr1	-	0.878788	2.21783767048395	0.886364	2.58626748368699	0.84	3.79849246437563	0.901639	3.64033974883359	0.857143	7.40571004919249	0.810127	7.49183058993261	0.832	8.59873505100121	0.851852	7.78977847569498	0.855457	18.2312461300698	0.836364	18.1245771667895
Map2	chr1	+	0.597625	1.70158983716172	0.559105	1.62593825915927	0.61706	1.00400865428422	0.54947	0.947459110157803	0.607991	1.47563395374352	0.564489	1.56996449086513	0.539116	1.33792579491546	0.55877	1.42694486171488	0.56686	0.740667538772075	0.50108	0.826652730667845
Map4k4	chr1	+	0.59534	25.8365300245192	0.611933	25.1335744281956	0.591713	25.4644363701759	0.587181	25.4341117493888	0.58933	21.9647199251161	0.578165	21.8105256540321	0.620026	18.7415257680048	0.626694	19.0910596408844	0.664679	29.7489624227709	0.650094	28.0278977449188
Mapkapk2	chr1	-	0.486649	12.3637727520042	0.524955	12.6204107213127	0.437644	12.9033480106927	0.434595	12.0865129770475	0.456637	10.7712964854078	0.425242	10.1536920005852	0.381939	9.52090435285759	0.370458	9.97710454194714	0.435505	9.4092729735479	0.456221	8.99705394868671
Marc2	chr1	-	0.497347	9.77248247845823	0.507469	10.8992072176875	0.450331	7.39427458253705	0.455035	7.87489742390118	0.353571	7.92820344829841	0.383398	8.0719964962825	0.329537	7.51572443967525	0.31918	7.38344272272567	0.259634	8.39875795655302	0.276062	7.76093487303538
Mark1	chr1	-	0.472701	4.23385253997909	0.448583	4.3181155692648	0.478681	3.14660833426409	0.43401	3.09977769695749	0.424746	2.38125852359141	0.446899	2.45540695949953	0.461538	2.04740772064567	0.388502	1.95445847851126	0.428238	2.31563504415384	0.406109	2.13240529954603
Mars2	chr1	+	0.477842	4.32803279860994	0.487782	4.21894986265065	0.508343	3.96935911693324	0.479911	4.02272688978076	0.503567	4.17380286784177	0.469162	4.21572223205606	0.473558	3.58759143879808	0.488907	3.70602184052016	0.417942	3.29647148822692	0.401597	3.42010207509519
Mcm3	chr1	-	0.481815	170.342075121356	0.479183	166.86025901145	0.494701	147.530341830551	0.49676	140.010247991983	0.496219	152.697041067861	0.490577	151.340777736067	0.486602	156.540056367035	0.485839	155.193016823777	0.504511	139.064335872678	0.500159	137.144604296085
Mcmdc2	chr1	+	0.47486	1.47226093250205	0.396855	1.55040289017693	0.47973	1.01254356819173	0.427224	1.14857220042288	0.376543	0.915674622948815	0.433281	1.03286109815997	0.4	0.908309921159237	0.435374	0.948878116614934	0.341026	1.07455461021098	0.360092	0.977088603578072
Mdm4	chr1	-	0.520336	28.4469270842649	0.513795	26.8097454076259	0.497148	25.0470141077445	0.505198	26.9180880873356	0.482874	24.8475901400753	0.480768	27.912366242018	0.483707	20.1606248159913	0.471338	21.1230427783626	0.426978	33.9587261592565	0.43595	34.9564858408071
Mettl13	chr1	-	0.541879	4.1656935997051	0.548771	4.0509557207666	0.541438	4.4505639259027	0.528964	3.95923177946076	0.49711	4.28242406823043	0.470906	4.12110614778047	0.482234	4.90107542520098	0.510279	4.79878020584618	0.488145	2.93215080866316	0.46899	3.03385894953252
Mettl18	chr1	+	0.72619	7.30343619529245	0.483333	7.97238419307912	0.544776	8.90597944110994	0.585034	9.32819169870711	0.527607	8.92555805634443	0.604167	8.3527179058212	0.585366	9.57340073334776	0.536364	9.38203680692255	0.492958	9.56387988421639	0.531579	10.3800040416544
Mettl21a	chr1	-	0.681529	2.75406013189657	0.651282	3.07675838053909	0.631004	3.54956221102581	0.633929	3.90422745123715	0.648111	3.07886069559894	0.68	2.97399348266032	0.678571	3.62445501690168	0.673352	3.47089313058777	0.643519	3.35217760176011	0.654102	3.11460712940785
Mff	chr1	+	0.578101	7.3098244465222	0.592287	7.24814045424041	0.599345	6.72428795379498	0.56882	7.30153034872689	0.598081	5.63313042614325	0.575306	5.75095147027967	0.541941	5.06679980946172	0.619768	5.08243304145785	0.573885	6.50562291962351	0.548644	6.71595098803616
Mfsd4	chr1	-	NA	0.0366587721166172	NA	0.0136311739220391	NA	0.048395507789423	NA	0.0346954332054781	0.363636	0.177350643543168	0.464286	0.185318708332823	0.428571	0.142839968346245	NA	0.155742410831995	0.469388	0.32577711920655	0.366279	0.307957528431868
Mfsd6	chr1	-	NA	0.165693971698008	NA	0.157704534376681	NA	0.134596814416601	NA	0.186312705923192	0.666667	0.245633527818125	0.783333	0.296451910649758	0.680851	0.335191704058528	0.851852	0.307004166235523	0.723898	1.00221246279445	0.732919	0.996921121704768
Mfsd7b	chr1	-	0.559859	4.38567148781508	0.567096	4.15135499434651	0.558794	3.46128927553691	0.567178	3.63172654335754	0.657077	2.41114090400584	0.602926	2.34685011709404	0.552583	4.07441257920661	0.558919	3.82299115745056	0.638182	1.98521964051843	0.559184	2.1762781105213
Mfsd9	chr1	-	NA	0.0332640751474709	NA	0.0669044613506211	NA	0.052785465612533	NA	0.0583858134902099	NA	0.132929155019301	NA	0.103158516407337	NA	0.118934306082834	NA	0.165457606304442	0.643678	0.658715052323192	0.713964	0.691438004990961
Mgat4e	chr1	-	0.521739	1.1166706449615	0.611111	0.995982519082736	0.78125	2.09546169569404	0.8	2.10972664625571	0.820175	2.80100468722989	0.768559	2.65276049261918	0.842466	2.8893881458658	0.83125	3.07342922627738	0.769231	1.20373065790809	0.703704	1.21455435590312
Mgat5	chr1	+	0.628853	1.68067311954806	0.593182	1.49697304316807	0.620035	1.00017992374345	0.576208	0.929239685985039	0.621053	0.848851997175366	0.6	0.793329457890472	0.608889	0.6811476692991	0.724138	0.703689222031839	0.680328	1.41403416763087	0.691254	1.26067934491277
Mgst3	chr1	-	0.25	4.23829580999723	0.397727	4.43174533388161	0.370968	5.90677311133865	0.251462	5.68268182424274	0.442353	10.0365284105165	0.372745	11.14948001709	0.416938	11.5953530372043	0.50996	11.3784155146829	0.440898	24.5447965277858	0.451647	23.7602830526358
Mia3	chr1	-	0.403379	10.4334548500265	0.348732	10.0681189556461	0.444962	11.3209566889439	0.429025	11.0327824824386	0.425673	9.75314364809123	0.443075	9.75863886293713	0.418593	11.200462993853	0.481597	11.279477655691	0.435763	9.44062151777024	0.41224	10.372625067468
Mir1981	chr1	-	0.714286	0	0.307692	0	0.25	0	NA	0	0.5	0	0.190476	0	NA	0	NA	0	NA	0	NA	0
Mir6904	chr1	+	0.473684	2.31313955401341	0.555556	2.55884600314875	0.5	2.6917961319824	0.621951	2.97738601131667	0.569892	2.13201852507485	0.263889	1.36572519210345	0.522727	3.11233234201446	0.757576	2.53125442480676	0.447368	2.43807027671379	0.39759	1.75713778726567
Mixl1	chr1	-	0.52381	0.621542816518687	0.5	0.485779178017124	NA	0.263932806688647	NA	0.326097748623938	NA	0.215546772620907	NA	0.23932934927009	0.636364	0.230747998396955	NA	0.303110545115264	NA	0.178019516717332	NA	0.164224211678186
Mlph	chr1	+	NA	0.0289304368338433	NA	0.0205736704965292	NA	0.0360710300626992	NA	0.0418929383242476	NA	0.0656373073011657	NA	0.05124337569774	NA	0.0718632760293399	NA	0.0664826390835003	0.727273	0.381161817574725	0.460526	0.338438448553429
Mob4	chr1	+	0.460432	13.2762775724923	0.477157	12.7680279145492	0.466942	15.4532938806619	0.488525	16.7898047465657	0.420495	15.8269313407565	0.498141	15.8819821584424	0.395062	15.772865376726	0.450331	14.6259582396831	0.463602	13.3546073596839	0.466135	14.6002406456742
Mpc2	chr1	+	0.585903	1.87394540993439	0.530201	1.82588057326689	0.549828	1.95232190863348	0.530534	2.05929277748602	0.557971	1.55754457923156	0.556818	1.74158063334591	0.616438	1.33670683919852	0.484127	1.12462282988861	0.619048	0.960145096037909	0.626016	0.897709828134639
Mpp4	chr1	-	0.456364	0.0460793905209808	0.437236	0.024273351580202	0.415565	0.0182389454949152	0.490884	0.040600239305527	0.412316	0.0217801694259381	0.453642	0.054700337267692	0.410749	0.0454211583473941	0.448905	0.048023232751537	0.463384	0.0848014438594584	0.397135	0.0750073683789607
Mpzl1	chr1	-	0.43694	26.390315956866	0.428045	25.9578708981393	0.455577	32.0638956073876	0.454691	31.8332886626845	0.456639	26.6809529571339	0.449318	26.3455870054677	0.488195	20.1929336260671	0.462919	21.5647190346396	0.489235	28.6477263732635	0.475942	27.5882016873698
Mreg	chr1	-	0.704994	48.224402289624	0.699134	46.5762628335835	0.680334	45.9505324883182	0.682653	45.2367299057943	0.713181	33.6233797186827	0.709272	34.1469168397505	0.733722	26.6311331045926	0.749191	26.5306273208807	0.769715	23.4465005617217	0.733119	20.9684083514003
Mrpl15	chr1	-	0.571998	20.1381324509392	0.576954	20.8109697649242	0.562094	21.3275988417788	0.554242	22.8730655203947	0.547664	24.034759562279	0.548994	24.1148845141176	0.542463	24.8498006670656	0.541628	24.7626890981237	0.522706	26.42315278745	0.532204	25.8219751851853
Mrpl30	chr1	+	0.382979	16.9440698967562	0.326531	17.4198580432673	0.46875	16.1206785488989	0.333333	15.9113294322609	0.529412	14.3703579698241	0.464286	15.2096271635019	0.394737	16.1399270925173	0.37931	15.960555643484	0.34375	16.3637644068361	0.741935	15.7944137321807
Mrpl44	chr1	+	0.481605	27.8097343583182	0.488032	27.2106412111862	0.483075	29.2904750638888	0.484254	28.492420520933	0.520953	27.6707513796211	0.519467	25.6093780328146	0.508152	32.6273552575172	0.491747	32.247627082748	0.521241	24.8735567950948	0.519042	23.7318345504194
Mrps14	chr1	+	0.4	14.3991872255956	0.581395	15.6700987051109	0.4	15.4680902696026	0.4	16.3367265023563	0.313725	16.5563415250672	0.454545	16.3084970402253	NA	16.9759306871326	0.461538	16.5273510594542	NA	16.5164045134521	0.363636	16.242737928234
Mrps9	chr1	+	0.518554	9.07884195733822	0.470409	9.89574590437112	0.454648	8.40928561823817	0.486515	8.98902052707349	0.476547	8.88695349831218	0.488732	9.12442509627422	0.450201	9.04590781342049	0.472042	9.2580751374218	0.483911	11.6733067500117	0.486264	11.4030711367454
Msc	chr1	-	0.963746	1.92355815544273	0.941935	2.27506420956647	0.901468	2.16052057961745	0.8921	2.21345144262358	0.788274	1.33790636188908	0.789831	1.14609102378272	0.539792	2.08538867450767	0.57971	1.84515125176703	0.567164	0.716450476051859	0.628571	0.638118459585954
Mterf4	chr1	-	0.440625	5.04252135181011	0.478207	4.96016107705794	0.512987	4.89038447606153	0.469318	4.92704146657852	0.480649	4.5528363722714	0.459686	4.44797052278435	0.418386	4.75645484272575	0.425139	4.80371677798985	0.491611	4.5039466845863	0.463061	4.52955518843692
Mybl1	chr1	-	0.529412	5.657557394196	0.460289	5.77838098264867	0.478618	6.51500940369422	0.409524	6.93784127928546	0.470297	5.70966012576969	0.458607	6.29183623868778	0.482659	4.3857445423833	0.529968	4.45490470065999	0.466934	5.87139255364973	0.478437	6.76904642364976
Myo1b	chr1	-	0.522757	9.85716385485656	0.55425	9.86526182848501	0.535667	9.34410719658479	0.521043	9.60154914742137	0.52019	8.77357475087094	0.540015	9.14395255616564	0.469306	7.19830009885667	0.47651	6.91450893655516	0.482409	11.0255169210727	0.49907	11.4324672785995
Nab1	chr1	-	0.638767	1.46286330478082	0.681633	1.52924483087134	0.632184	3.57872888884971	0.567989	3.64303148756622	0.517824	2.92122538248061	0.644444	2.95588825859484	0.531062	3.95143582709416	0.542914	4.02475627335555	0.583878	2.9316803992005	0.536913	3.09539106885488
Nabp1	chr1	-	0.611002	2.33254727938422	0.596358	2.26098215032954	0.652174	2.13136350759007	0.608065	2.37530884329808	0.655629	2.7942191483065	0.652807	2.87496563444794	0.753205	3.02575815001444	0.658497	2.81592374156221	0.680778	6.73739978150251	0.698466	6.88387365909447
Nav1	chr1	-	0.471174	3.05786808822701	0.434155	2.7283111100605	0.496674	3.51704085229434	0.457574	3.1956718716866	0.518001	3.85596230286901	0.536137	3.97563219952044	0.532812	3.3558657513023	0.517763	3.67455400905182	0.54262	4.3300887119921	0.578031	3.94219138150008
Nbeal1	chr1	+	0.490659	1.98132468279004	0.529359	1.71539991543519	0.500954	2.06542253950098	0.479472	2.08797686728092	0.487103	1.87957823169902	0.457801	2.31074541056807	0.491499	1.97284224472406	0.511418	2.09122858177427	0.478204	2.36440496755485	0.487295	2.74648155001588
Ncf2	chr1	+	0.786127	0.811645145704069	0.820652	0.704883470823237	0.817568	0.694403209695423	0.817881	0.647066964596717	0.819372	0.775050848582295	0.821176	0.751916720335951	0.841317	0.951682293159031	0.791411	0.884177501017072	0.816406	1.76459098731291	0.802848	1.83993756858351
Nck2	chr1	+	0.78022	2.90479444106129	0.759259	2.9879460568113	0.853933	2.64294070114379	0.821918	2.39281085379175	0.74359	2.42946667637598	0.769231	2.58113375438391	0.68	2.11352704271928	0.673469	2.23841300380891	0.699115	3.65140472699382	0.628571	3.64415783566413
Ncl	chr1	-	0.487811	409.620914781275	0.48764	423.747047356887	0.490101	423.94569927129	0.489421	439.548829389862	0.494568	411.763454916397	0.493886	406.859249053516	0.497271	431.266655554655	0.495373	424.324703762889	0.498441	276.105934810659	0.494101	325.288373660114
Ncoa2	chr1	-	0.536817	4.46155553372587	0.506541	4.11328407189626	0.508921	4.24381841179908	0.54856	4.11448688450133	0.510436	4.09542236424364	0.51286	4.27170139856908	0.522407	3.39022079815137	0.575385	3.74381947598433	0.514387	4.09629941342194	0.544334	4.03340745384925
Ncstn	chr1	-	0.462949	13.4862146178936	0.489905	13.2810315006555	0.522899	13.7150519756841	0.507174	12.5211253479686	0.517114	12.3813030526422	0.511064	12.0086469616777	0.504339	10.66944266518	0.51593	10.5425632404461	0.509804	10.4277339099322	0.52208	10.1646111032709
Ndufa10	chr1	-	0.543714	28.6929996752701	0.545433	30.840859910533	0.550062	29.8753352277478	0.556597	30.9318317666224	0.553981	27.2541713652469	0.551694	26.9849968433537	0.563522	30.1451269170198	0.548409	29.3874763187922	0.524888	26.1176418062147	0.518384	26.4119806617783
Ndufb3	chr1	+	0.426966	41.6801675549122	0.455708	47.0416122037393	0.434512	44.116779687539	0.426285	47.1913731688836	0.431793	52.1034461729302	0.429766	52.4609910365306	0.412724	50.9174935445161	0.449758	53.5010314330486	0.457674	53.1121733642481	0.45806	51.797336038533
Ndufs1	chr1	-	0.44188	25.2595354219263	0.448544	25.2157225788187	0.433091	24.5790348267114	0.445787	25.7065578770792	0.44572	23.3065576921026	0.443091	22.9758576025163	0.465356	24.1777634768512	0.451841	24.1093688360289	0.453356	19.5922535450828	0.457137	20.0746581662735
Ndufs2	chr1	-	0.510502	88.659748930967	0.534691	91.8151749398611	0.515695	86.9894377624613	0.518374	83.5283569309698	0.496269	88.0520318358302	0.510734	87.4640145773063	0.502852	83.9472699792378	0.534063	82.6780141766584	0.520115	84.6944821514846	0.512213	83.7992912874757
Nek2	chr1	+	0.498077	29.005622657328	0.507996	29.0501305600102	0.487412	25.5304243727579	0.501885	24.7340689416916	0.50018	27.8595423368395	0.502098	27.506909669497	0.493882	25.293240217713	0.492345	25.6606758076884	0.492392	28.1113210038825	0.494528	27.1171183930516
Nek7	chr1	-	0.460426	6.99890924953974	0.456495	6.8683992127631	0.472717	7.87845122735867	0.520345	8.46005404440819	0.471897	6.79903304632059	0.504193	6.72796174376377	0.498741	6.63931558580219	0.532159	6.62879115984407	0.52836	7.69951143379593	0.517777	8.47209129761407
Nenf	chr1	-	0.410714	3.30012066290916	0.324415	4.63760047182148	0.360406	3.87159472544754	0.35514	4.40237820440135	0.393089	7.19705444883758	0.421053	6.7826109607833	0.450704	6.11786580312422	0.417197	6.78833312658082	0.470907	13.0438402708687	0.421931	13.2483926561426
Nfasc	chr1	-	0.129032	0.250904914649896	0.478261	0.204314866443408	0.25	0.183965908449477	0.314286	0.169234242000608	0.425197	0.329370977841186	0.476341	0.329198721534004	0.449541	0.312985016007458	0.277108	0.2589771229113	0.471729	0.865160168359266	0.437604	0.745736978756682
Ngef	chr1	-	0.507692	0.539752307712425	0.327273	0.460985445125518	0.47619	0.323291263994814	0.52381	0.293735713408386	0.323944	0.531818193302922	0.456522	0.598828431080214	0.302083	0.714735948846737	0.415842	0.733966551910037	0.442857	1.16081489423306	0.506061	0.994886465465914
Nhej1	chr1	-	0.654952	5.00428500831148	0.614919	5.58623613133101	0.639113	5.65755285930393	0.601594	5.36405517591136	0.612546	4.97314517937853	0.646245	4.62883385274338	0.583333	5.85377163212518	0.592405	6.11327376781818	0.635328	4.51722665982966	0.619048	4.57012992648579
Nif3l1	chr1	+	0.585135	8.36290978549615	0.575448	8.0924252382387	0.570944	8.43655005285973	0.587905	7.84075985432191	0.577059	8.60165608706935	0.598562	8.30600647340582	0.570586	9.95943882252253	0.555891	9.65176474648138	0.599582	7.83121070396811	0.541667	7.77676635833556
Nifk	chr1	+	0.529486	75.707703857064	0.507777	75.8373682233825	0.519345	86.7399258339282	0.518005	90.5739954158254	0.527356	83.1572355289882	0.503027	79.0806240893022	0.484905	94.6347626676546	0.458148	95.0503426812513	0.428215	44.5577505228222	0.454495	43.3108085138736
Nit1	chr1	-	0.501992	4.43070344013883	0.536364	4.59842207529125	0.5072	4.62316219574489	0.533069	5.09127272905324	0.525161	5.23783707677047	0.5	5.19278944414876	0.522059	5.15494000031546	0.508403	4.93101911246115	0.425891	4.38571701591275	0.487179	4.11523664905683
Nme7	chr1	+	0.496493	3.85340863723129	0.503109	4.08266330899644	0.475697	3.36962065879869	0.456026	3.45856371570684	0.429003	3.52307213676426	0.422575	3.48649363815003	0.452796	3.45050533304342	0.473108	3.39130368606045	0.435354	3.64638664683576	0.469212	3.59435751793327
Nmnat2	chr1	+	0.400289	3.50119939898429	0.433002	3.40834847749333	0.440099	4.62162511315406	0.464592	4.61099546550195	0.421201	7.10111134683295	0.441475	7.40590071930059	0.486283	5.24138914218164	0.470558	5.61793113604621	0.45737	9.75790428687411	0.463872	9.06432035123692
Nop58	chr1	+	0.482255	52.8716660133268	0.486541	54.5419761913955	0.475434	64.707803617669	0.479956	70.0575150686363	0.472604	58.5112509205196	0.480262	56.3214591639104	0.46286	58.106862499058	0.471882	56.4036567053894	0.477171	32.3674716834658	0.485341	36.8789868922398
Nos1ap	chr1	-	NA	0.068414556543037	NA	0.0709515859612222	NA	0.0888547882677517	NA	0.110075796804093	NA	0.206149949600285	0.6	0.161292938568647	0.545455	0.225704120730996	NA	0.243313296069161	0.531915	0.561478156221632	0.446809	0.451489149201412
Npl	chr1	-	0.263692	4.92524516926321	0.255061	5.33096003690683	0.270734	3.99821400189493	0.310964	3.94961164444461	0.366806	4.95039492204141	0.376408	5.19512658819163	0.411429	5.80187649354251	0.407869	5.79059712844091	0.40114	7.20854190561871	0.385181	6.82275061389762
Nr5a2	chr1	-	0.556668	18.6191853075544	0.558973	17.9858498858864	0.584945	14.2950782355012	0.574838	13.7972239371678	0.647445	8.92049317369427	0.617813	8.73137021631042	0.616622	5.37039364112645	0.603306	5.46530398922465	0.642173	1.47225168175973	0.719481	1.47883742540055
Nrp2	chr1	+	0.218176	5.27289166212669	0.211975	5.20363100396641	0.358042	15.5082060164503	0.368336	14.9440980302638	0.367314	14.167053007785	0.360735	14.4701671074394	0.352344	9.52513679436986	0.344666	9.86171764851964	0.16962	2.92206764839999	0.212901	2.73294130275251
Nsl1	chr1	+	0.508918	7.25073069290944	0.487354	7.49117832348772	0.51403	5.88357702542109	0.495323	5.96235164004854	0.508267	5.9695838326582	0.504726	6.04502299656474	0.523128	6.00724069239659	0.547404	6.25224138852184	0.479842	7.33122169196268	0.494361	6.88653544934137
Nuak2	chr1	+	0.517529	1.9253936354057	0.507563	1.69318392416807	0.528885	3.36513755508471	0.549962	3.44136832755725	0.533578	3.71128530852316	0.570353	3.74780851682243	0.554734	2.27103764006687	0.580645	2.32759176011695	0.479157	6.20204858529179	0.529847	5.64314661867951
Nucks1	chr1	+	0.628602	148.199531141872	0.617223	141.634496225221	0.59826	140.839200484952	0.604027	142.358080396023	0.594783	105.227344765684	0.59592	106.519468970467	0.605638	105.854404174748	0.609912	105.531577841994	0.603683	74.7315234427163	0.601219	77.5227988928367
Nuf2	chr1	-	0.509966	8.71810296284673	0.481668	8.96088996168793	0.476269	8.8820115142363	0.519462	10.1299677981621	0.514743	8.88613051534115	0.495623	8.94528582473714	0.494499	9.22814675804359	0.468513	9.22991727394014	0.491732	8.75016411723075	0.496144	8.97675446295186
Nvl	chr1	-	0.589882	13.4941372464142	0.570746	13.0730129488419	0.581158	12.7131174110256	0.591328	12.3920061820538	0.590581	12.9375700062724	0.585069	12.7495360917435	0.570383	14.3220288829784	0.584219	14.2283973143875	0.597422	14.3886606097535	0.615358	15.148956036458
Obsl1	chr1	-	0.674888	3.38990915814574	0.682012	3.20213010524119	0.694946	4.82757960733495	0.685734	4.60750661074216	0.654851	4.19175013410843	0.65813	4.02263715821712	0.59708	2.71098734412625	0.614627	3.00850664681709	0.496807	2.51929609347963	0.527313	2.35957020520042
Ogfrl1	chr1	-	0.485	0.879158478908538	0.527473	0.987646126578688	0.535937	1.02466368799763	0.527851	1.20234587092217	0.531987	1.31168780616271	0.559353	1.33905854737746	0.49235	1.4855595060867	0.565217	1.53720093907521	0.576712	2.3417831875391	0.519608	2.626345680478
Olfml2b	chr1	+	NA	0.170253050211391	NA	0.138483588215643	NA	0.166490044627575	NA	0.11682271849734	NA	0.234318029523574	NA	0.200384809195002	NA	0.238404580044453	NA	0.180827254709135	0.725806	0.738904658984664	0.645833	0.692295256152425
Opn3	chr1	-	NA	0.850650118268915	NA	0.672148518861604	NA	0.69360335698643	NA	0.72343242832469	NA	0.712244557735408	0.461538	0.770634851674798	NA	0.57017918493779	NA	0.611708792780013	NA	0.647539400467154	0.409091	0.720031527149795
Oprk1	chr1	+	NA	0.0101615353591235	NA	0.00401461235019513	NA	0.00703866637693074	NA	0.00953716833752814	NA	0.0312195915593957	NA	0.0244427316159798	NA	0.0385630647523122	NA	0.0426255389424895	0.6	0.217182124420048	NA	0.221279159222485
Orc2	chr1	-	0.558264	45.7346731929817	0.559863	45.8022914473759	0.572922	45.9209014453859	0.575706	49.305525856415	0.564738	47.7955088904711	0.575377	47.3689820540037	0.567528	49.6809952846218	0.601787	48.6005443491073	0.578898	37.6471784632768	0.557711	41.6032097150345
Ormdl1	chr1	+	0.530986	4.50038460969334	0.527778	4.25006497581542	0.563969	3.97320928593594	0.495609	4.09947532918274	0.471616	3.11613151244224	0.556948	3.28686913199434	0.466129	3.40489961162858	0.536349	3.45956014965045	0.55313	3.04267133822321	0.560166	3.09626998799162
Osgepl1	chr1	+	0.410095	1.26818148869052	0.445837	1.20327430402082	0.476886	1.11909505229109	0.474627	1.14597514497308	0.460426	1.18693596805859	0.448766	1.27026291930797	0.525153	1.2212372879354	0.527224	1.2718863741501	0.47703	1.74945854002577	0.47261	1.92862094304583
Pam	chr1	-	0.512605	1.15727002106947	0.523691	1.1739263954189	0.273865	1.09734572626122	0.371611	1.06204888777158	0.307078	1.28989079075333	0.317021	1.24309729009543	0.305389	1.0156813823577	0.269565	1.10096370558951	0.447867	1.56706973869702	0.377821	1.53545650386215
Panct2	chr1	+	0.894118	0.662051981090441	0.900621	0.639046058865426	0.936709	0.434616806122609	0.839506	0.475108062091021	0.869231	0.416054100524316	0.718447	0.523159671753975	NA	0.249172537015646	NA	0.218167098604097	NA	0.194937131954887	0.55	0.262888284483145
Paqr8	chr1	+	0.920469	1.21431396776834	0.93638	1.18933451710804	0.924615	0.821566785909352	0.96562	0.881470102384615	0.934844	0.738813270848643	0.937931	0.683609165945367	0.990909	0.678096180817908	0.90566	0.682949786226561	0.891391	0.925197617306765	0.887838	0.847351522230064
Parp1	chr1	+	0.528382	140.144048700942	0.538634	138.101335238655	0.530302	161.50533410689	0.52762	152.810097082394	0.530536	183.214503340293	0.538695	183.596877055471	0.529995	136.78200609233	0.536449	139.936716137988	0.54069	169.589905260613	0.542737	154.73711230669
Pask	chr1	-	0.488909	5.82972442831354	0.474039	5.60527280927844	0.505697	5.17846059089841	0.523217	4.98574543165715	0.459366	6.81480226006542	0.459372	6.92953955240372	0.439485	6.18426091300719	0.457143	6.15293190641024	0.417391	9.45967679329223	0.412627	9.06741281599525
Pbx1	chr1	-	NA	0.245165390609931	0.714286	0.255639034749295	0.427822	0.542495194985784	0.398126	0.556566225371001	0.443299	0.826250172629052	0.433373	0.805639313416252	0.437984	1.18530866498129	0.451138	1.17235988489009	0.481623	1.56341872880141	0.52706	1.61829547106443
Pcmtd1	chr1	+	0.539184	7.28319138596026	0.548644	7.58973787451185	0.51521	7.76143797972078	0.535122	8.25003616926313	0.557184	6.46173994517351	0.56348	7.25324001641969	0.542847	8.22514650197538	0.537313	7.81192895109997	0.561552	9.283707987097	0.542768	10.2777772500325
Pdcl3	chr1	+	0.480167	18.5396024425238	0.488318	19.0524119803742	0.489566	17.7675588894521	0.497573	17.6984303605559	0.477882	16.35582829709	0.503073	15.9699317063196	0.480335	14.7516165994508	0.457802	13.85212334933	0.519122	12.7898042318848	0.48833	12.8331864850328
Pea15a	chr1	-	0.387931	2.87000648368331	0.341121	2.90527059801764	0.448341	7.82072000102809	0.466581	7.35280744140864	0.504937	12.7041849785346	0.488726	12.4685455284716	0.478826	12.8373710431187	0.527689	13.7221393718584	0.33636	11.1869074979898	0.352526	11.217875280924
Pecr	chr1	-	0.82069	6.39958437826059	0.871134	6.96304146559805	0.884058	5.94823023887932	0.907303	6.24212610626182	0.878505	8.03812525211268	0.863946	7.87343976549934	0.815287	6.97274253587196	0.838284	7.56237304804404	0.714912	12.3824003450097	0.735598	11.9203717500882
Pex19	chr1	+	0.722807	15.177105846506	0.697007	15.0545998795999	0.712725	16.7755194403133	0.712139	15.3600729843319	0.692211	17.0826721532144	0.705016	17.3652942643654	0.68839	17.7685654598782	0.728758	16.9327319259229	0.663343	25.9691231269733	0.664598	25.9372421450027
Pfdn2	chr1	+	0.587916	36.1327445088769	0.5625	37.3256728288792	0.531864	37.389542599688	0.527497	37.1588188146356	0.542289	41.3145582587685	0.538745	41.5815650268752	0.569374	37.4553951493747	0.538132	37.779985053369	0.510883	46.839290673633	0.55428	46.9211124979502
Pfkfb2	chr1	-	0.523677	1.29470763953753	0.502288	1.28131273187329	0.388778	0.816900594624617	0.452303	0.88859313866486	0.491525	0.951271568588678	0.512	1.01754748023	0.472275	0.913250495597996	0.461679	1.07778957015449	0.413989	1.71892805144838	0.521355	1.78523648912986
Pgap1	chr1	-	0.636729	5.2219915695351	0.61794	5.07426224299768	0.682171	4.77100070033211	0.675802	4.81043617714697	0.679855	5.11335729484872	0.678767	5.34457975831925	0.68043	6.85131661485533	0.679322	7.15907202330934	0.633018	4.25643439164733	0.63487	4.77334080317077
Phf3	chr1	-	0.426763	19.2868076303709	0.486924	18.815027471879	0.511111	18.1249096694197	0.536481	18.315107312346	0.494624	15.2726009204393	0.516746	15.5558248865851	0.510896	15.0106808606487	0.470968	14.904914400481	0.472803	14.3617774110272	0.462998	16.2338852050009
Phlda3	chr1	+	0.734777	41.2551926230551	0.763713	42.6289487931327	0.727477	21.2774730903631	0.675676	24.1358769966445	0.72	21.0740253184115	0.75945	21.2797524925414	0.771429	14.9189858897077	0.794574	15.0121734520611	0.785714	23.6102371120207	0.740113	24.2856955290384
Phlpp1	chr1	+	0.481915	4.10174593694419	0.522375	3.91752912973603	0.50287	3.05646206446978	0.508897	2.73287171284584	0.517552	3.08551970102658	0.450667	3.27056662808817	0.517949	2.38991779662389	0.489324	2.34598399578728	0.546087	3.8829663389576	0.521423	3.76967471914368
Pid1	chr1	-	0.853901	1.53235588468025	0.849198	1.50301561304803	0.8125	1.76396782920003	0.836779	1.70875433101752	0.72093	1.28947424876346	0.772366	1.28519070906988	0.773723	1.14042095972737	0.702929	1.07915937543156	0.810078	1.4142269492404	0.778915	1.4680013234213
Pigc	chr1	+	0.586957	1.13773809969639	0.496	1.15255584679641	0.603448	1.07300875056065	0.641892	1.14703796085975	0.603175	0.814411782293299	0.536082	0.710498446997817	0.716667	0.811459681207572	0.618182	0.770156493345322	0.651685	0.957683565753085	0.596774	1.01938798312523
Pigm	chr1	+	0.547739	6.77654350599314	0.496296	6.80220029650531	0.540816	7.50180745648067	0.545455	7.78041139662956	0.459064	6.93992633215059	0.596045	7.24911488060534	0.454183	7.05407485276804	0.533333	7.61758802814066	0.510417	7.60277821164854	0.53605	7.45425115759788
Pign	chr1	-	0.542305	2.24918154310104	0.55627	2.26632579437184	0.575	2.16139929313547	0.55218	2.16249221397516	0.496438	2.34148676661954	0.502773	2.54569255945935	0.483904	1.84769363164535	0.487474	1.89740746354382	0.481678	2.78158801228167	0.461114	3.00663788617057
Pik3c2b	chr1	+	0.480769	2.22311317427239	0.536032	1.9647539788479	0.444299	1.53408941467625	0.405648	1.44830070463602	0.421832	1.88785401314683	0.408832	2.16285410326079	0.388747	1.30241004144058	0.412632	1.46882361339875	0.425197	2.19286433462576	0.436416	2.04689336565292
Pikfyve	chr1	+	0.484167	5.44910374985708	0.520848	5.18981808527268	0.478885	4.48968311135566	0.486082	4.47194199269849	0.466825	4.44357535896626	0.499339	4.75056456701296	0.487764	4.5865861778206	0.50379	4.62937488478074	0.428027	7.25208641728628	0.434793	8.0362370038577
Pkhd1	chr1	-	0.926707	1.25630472493307	0.896517	1.05515038018429	0.930189	1.13067798791346	0.895023	1.07339863259138	0.919721	1.08268445983885	0.923829	1.07993985219206	0.894886	0.946063372984109	0.929688	1.00026118248758	0.929119	0.585977384466175	0.881104	0.549562954625173
Pla2g4a	chr1	-	NA	0.266747590566091	0.807692	0.268256426554477	0.714286	0.276147223723836	0.227273	0.286773146079036	0.625	0.319791231172235	0.557143	0.33725830818751	0.458333	0.682680507454853	0.650685	0.761594294079317	0.468407	3.73807559442173	0.525194	4.30313173776443
Platr1	chr1	+	0.0452675	1.2525553025291	0.0639535	0.816147526465268	0.0994624	1.48401323026791	0.0195312	1.744590174906	0.0221187	2.46536279664868	0.039312	3.40946219382373	0.0473588	2.51539525832291	0.0930233	2.99704798633181	0.0347395	1.78572472393505	0.040493	2.11243359135543
Platr12	chr1	+	0.54071	4.20199192967815	0.549569	3.56220093977624	0.47569	5.09064785192218	0.540089	6.03545722258327	0.482125	5.60863270697518	0.505188	6.74084242883795	0.492929	4.78925480037757	0.552294	5.11946902053398	0.623188	4.28847908442458	0.509967	4.31627106514063
Platr22	chr1	+	0.457143	1.1788857801252	0.615385	1.14355707279159	0.777011	3.5212850363339	0.664336	3.73185967744964	0.692562	3.72385672264156	0.610034	4.77858357602608	0.661202	3.61084444874405	0.663102	3.32475650763579	0.807018	9.12554978649604	0.816594	8.68582439541943
Platr5	chr1	+	0.929577	15.2270903438498	0.9238	14.7935681078644	0.920696	35.3809172657432	0.948373	35.8558347068692	0.916589	44.4710507439127	0.913826	43.4410972720582	0.89201	46.0743217511154	0.89304	49.6329429680903	0.807065	37.1251610317782	0.810636	37.1502549480723
Plcd4	chr1	+	NA	0.21558657646064	0.35	0.229447775036475	NA	0.146284368523022	NA	0.145118512652358	NA	0.19496265925099	0.52	0.246780435705847	NA	0.255008373581662	NA	0.322577746286942	0.4	0.730382869979341	0.622222	0.670106755577952
Plekha6	chr1	+	0.187793	0.870306205525911	0.292857	0.835847828536491	0.320652	0.655590110731071	0.331492	0.680564525550166	0.278768	1.48781268744025	0.365922	1.70061469406993	0.366771	1.23559268926746	0.376667	1.29071297944704	0.349112	1.8343699682861	0.365815	1.63973560057425
Plekhb2	chr1	+	0.451128	2.67388158837914	0.448649	2.72301600463858	0.481481	1.70482668506736	0.515385	1.63750172963386	0.482759	1.79535051901571	0.478571	1.83941522298033	0.6375	1.31946872671105	0.542857	1.35471393067221	0.522222	2.62297838615656	0.491228	2.3642930226852
Plekhm3	chr1	-	0.527843	3.18305031880496	0.538959	2.93785123937324	0.581395	2.37684890707473	0.586223	2.24788077311447	0.604881	3.41183332634678	0.581774	3.49763431951783	0.605871	2.69960681671665	0.605263	2.68499319048521	0.515854	3.64588730030053	0.51972	3.41833369534935
Plxna2	chr1	+	0.54	0.790513489601463	0.518828	0.700214252155123	0.494845	0.522067565699826	0.464789	0.479865983038246	0.451613	0.433791122179548	0.514423	0.43393844642025	NA	0.385741184061247	NA	0.360439192725336	0.4	0.383630987409625	0.346939	0.337952825498849
Pm20d1	chr1	+	0.415698	1.0364366043808	0.419689	1.02630030716175	0.392765	0.735024053560972	0.375661	0.752183958891968	0.409524	0.806752598932706	0.454405	0.908497014844506	0.376543	0.616239351024929	0.478632	0.685325970336127	0.45524	1.56308126768685	0.453446	1.41548599638654
Pms1	chr1	-	0.466934	4.91325930965641	0.511274	4.87757905596984	0.467162	4.72961031361302	0.483683	4.94943051493389	0.490306	4.55142008288321	0.488599	4.40680675255714	0.506704	4.85340494359749	0.517934	4.72443770374931	0.543689	4.09170927538872	0.522523	4.84836764526068
Pnkd	chr1	+	0.536066	4.37910514317062	0.502732	4.52654462462378	0.510271	3.9130076322876	0.460031	3.80465415915586	0.511521	4.78835161612508	0.490976	4.97968112406213	0.45098	4.32142711548857	0.41541	4.41308307826435	0.425144	6.27443030546438	0.428887	5.58577769626032
Pogk	chr1	-	NA	0.0776033466065839	NA	0.0728162564903065	0.7	0.134385220144572	NA	0.119657621621088	NA	0.157038293357798	0.878788	0.150607477080838	NA	0.147252495534492	NA	0.123842929817898	0.751323	0.465775022611641	0.522843	0.379491170558743
Pou2f1	chr1	-	0.462271	9.96909211224535	0.461719	8.64082687651223	0.448456	11.6224360847503	0.448316	11.5903926443654	0.465673	11.0284807151278	0.473065	13.0217091935784	0.495573	8.71464884187724	0.468828	9.86582224854564	0.534479	9.54773753345027	0.551638	9.35895818320948
Ppfia4	chr1	-	0.432515	2.10586507389191	0.397008	2.12235039386022	0.50101	1.59949002399511	0.490683	1.47595122513973	0.46188	3.01955271280382	0.449784	3.55042831818129	0.497881	3.25105327415538	0.505882	3.48632922657081	0.491111	11.8623137021654	0.520255	10.8108624253186
Ppil3	chr1	-	0.612613	7.04291966282573	0.552632	7.15462270371363	0.535144	6.39154835127286	0.457676	6.66828478254061	0.527299	5.9408952465381	0.537994	5.63441652961169	0.486289	7.18849849017596	0.555556	6.78218093052628	0.50838	6.32249596286548	0.508148	6.72458392009803
Ppip5k2	chr1	-	0.59232	11.7455728805081	0.57154	11.6336531552854	0.539481	12.092092001536	0.569084	12.5440967215799	0.541746	11.4778645595748	0.536393	11.5682977410939	0.534706	12.9073401375748	0.543883	12.6431942988643	0.527317	7.98712003487839	0.528699	9.19657155582748
Ppox	chr1	-	0.60781	4.48979618949102	0.599369	4.11994042522478	0.558728	3.82613205300147	0.609082	3.51804699825538	0.572623	2.89852086626455	0.581148	3.15483023519563	0.533451	2.63611023172173	0.598684	2.95240134040251	0.553139	5.48723310340494	0.516698	5.16283275434471
Ppp1r12b	chr1	-	0.533191	0.684756001993665	0.579961	0.625249815940873	0.570652	0.476321206066508	0.511521	0.476810495062981	0.595703	0.559561960069368	0.602329	0.605966050180882	0.6	0.540642290965963	0.55414	0.576142092032202	0.623888	0.950326153711183	0.629766	0.87453461879589
Ppp1r15b	chr1	+	0.483309	42.9285042025802	0.481576	41.1838089334863	0.469633	34.8790319015957	0.475039	33.6167119344631	0.477079	36.3310357369924	0.470607	35.7555731177219	0.483832	27.4156326555103	0.480697	27.4036572393725	0.473566	34.3258415960964	0.471532	32.372106913287
Ppp1r7	chr1	+	0.488179	9.52328039939759	0.494815	9.58086070669193	0.46778	9.8748961551793	0.475237	9.7093245791026	0.478189	9.6050298133577	0.475958	8.90865485216327	0.474102	9.85966172806439	0.478643	9.76842316210681	0.488856	7.08060598633396	0.500614	7.1399732736387
Ppp2r5a	chr1	-	0.445065	7.75627691653653	0.392806	7.92217185341906	0.461942	9.43869833895386	0.508091	9.77230806032954	0.510995	9.8877990407734	0.492669	9.99244621025561	0.445026	8.66389731062906	0.522523	8.41173760166214	0.505983	7.35817832003839	0.5	7.22888351279663
Prdm14	chr1	-	0.234924	50.368613788642	0.219332	51.7489821081965	0.332356	14.7160170584082	0.318267	15.5458537987037	0.36105	9.60386971932119	0.347612	10.7380705475161	0.390135	4.6544924572404	0.447337	4.83515007658973	0.335329	2.19266259187946	0.362949	2.00193092985978
Prdx6	chr1	-	0.487973	99.3726004311497	0.512744	101.615017856782	0.495007	111.209250259211	0.499316	107.543892368014	0.518939	102.792672514428	0.553444	100.229401840582	0.577899	116.487156117699	0.549834	114.359482537297	0.557762	97.0560725247372	0.579845	96.8292650453696
Prex2	chr1	+	0.545817	0.409635581324562	0.512968	0.387822655715784	0.574315	0.490187830232588	0.54993	0.480425944387301	0.503876	0.226920148597587	0.495455	0.239959636645493	NA	0.303251933897286	0.68	0.309392474429538	0.526316	0.258990225673753	0.59322	0.267934683607022
Prim2	chr1	-	0.548454	7.37579099757507	0.549772	7.7026706690319	0.548052	6.68840038515153	0.565633	6.92259170294967	0.573365	7.86450080336638	0.541654	7.72032629224258	0.607151	8.42544014441263	0.610218	8.27120846335643	0.68623	8.71359665375366	0.649155	8.79690407983413
Prrc2c	chr1	-	0.464707	48.4799954280706	0.475314	42.7822882320333	0.47518	47.1009241689262	0.463011	44.7088382638225	0.466957	39.4689221146066	0.467625	40.852749411263	0.455232	43.5790352743625	0.47172	44.3366389548353	0.463257	42.242751741824	0.470075	40.8529840229496
Psen2	chr1	-	0.533333	0.790643060394197	0.70892	0.749114740566979	0.756098	0.791010266854478	0.677966	0.667712490765039	0.815584	1.03235338376778	0.693252	1.17583096140701	0.703072	1.10343113041872	0.774336	1.04528186531321	0.744038	1.90424994950626	0.667732	1.85343153396393
Psmd1	chr1	+	0.51258	54.3423184986762	0.523617	54.1702239525497	0.512701	55.0200641629328	0.507346	55.3028191877456	0.520718	52.9425043386653	0.531244	51.3335337874684	0.525915	51.0557615134919	0.516435	49.6993427278335	0.511657	45.9716636157901	0.520917	44.6151916924005
Ptgs2	chr1	+	1	0.402678202273994	0.916667	0.409088121931969	0.833333	1.21789921373895	0.822086	1.20866920120972	0.844828	0.60218601841088	0.897436	0.619347428820712	0.8	0.549859319879915	0.545455	0.548033163239821	NA	0.0921374083830885	NA	0.151658639149808
Ptma	chr1	+	0.195146	1417.64618074218	0.178895	1457.18741359975	0.179773	1333.30430551657	0.140406	1540.78860566449	0.183317	1531.75704402257	0.189236	1508.70347936029	0.172572	1622.22815149145	0.178522	1604.62416272249	0.181485	1357.37325256847	0.196942	1275.28986251521
Ptp4a1	chr1	-	0.690909	36.8101862298713	0.740385	35.3543956102484	0.697297	30.5971030150038	0.764368	31.5708246814882	0.694323	28.3825766521938	0.702479	27.8584293687677	0.68125	30.8896876656433	0.704225	30.711148167239	0.671958	42.6470160605952	0.679537	42.3008588370811
Ptpn14	chr1	+	0.546961	3.79102757578548	0.567441	3.63186561989554	0.588235	5.33227408569161	0.609595	4.98600613134215	0.575064	5.12499256646637	0.553102	4.8026933468378	0.581259	4.99284370713829	0.580676	5.0512802178178	0.583304	11.009396892567	0.581536	10.2552498302364
Ptpn18	chr1	+	0.0210526	0.315117162903491	0.0364964	0.311240676049748	0.0305755	0.64490208579699	0.0693374	0.699057397989747	0.0694864	1.87197067094527	0.085491	1.80726946674633	0.0797448	3.41218511078217	0.10864	3.33597654547199	0.139194	3.46604437790523	0.154562	3.35304221349096
Ptpn4	chr1	-	0.541925	4.77768237713061	0.580097	4.63940378817391	0.589713	5.10234411611297	0.579481	5.18271223909201	0.586634	4.24246668341235	0.577002	4.61788268441468	0.604959	4.42774547035991	0.54717	4.50163509953598	0.53915	3.00123199154522	0.539877	3.59392959029185
Ptpn7	chr1	+	0.473684	0.718771535294138	0.6	0.776657747057686	0.600897	1.00701307044559	0.515748	0.980751537651018	0.692308	1.40637537959297	0.583493	1.51123045629729	0.684211	0.846449561891688	0.698113	0.825457748266629	0.755319	0.769638294087174	0.527559	0.872060975902221
Ptprn	chr1	-	NA	0.10942364094062	NA	0.14698545527955	0.636364	0.585139625839096	NA	0.53697531602662	0.85	0.434455175303556	0.674419	0.46181303990716	0.782609	0.902253521963134	0.529412	0.97788988899042	0.544892	2.26181847158382	0.418079	2.31909931682917
Ptprv	chr1	-	0.30832	1.5194151972441	0.298335	1.39687805641232	0.345811	1.13758367887322	0.341573	0.981435831875442	0.374074	1.31316154600646	0.375712	1.51043563777215	0.384921	1.26037278612278	0.349174	1.47821345778432	0.378834	2.74121519626368	0.362252	2.56788070963393
Pvrl4	chr1	+	0.75	0.430271126865068	0.637931	0.457668665806104	0.433333	0.426425182375673	0.557692	0.449320216103165	0.630252	0.601323964883632	0.475728	0.556393056698726	0.666667	0.655150495666973	0.37931	0.674573222713451	0.454277	1.97320329990044	0.569659	1.67509737109034
Pycr2	chr1	+	0.510449	30.0320272779421	0.504722	32.0388997785828	0.537155	18.5393461066331	0.546777	18.2759965542518	0.539209	21.3632647325705	0.561406	21.8224130190272	0.573968	19.0284150050613	0.54467	18.559023948535	0.618075	21.5325097266688	0.6241	20.8352702229377
Qsox1	chr1	-	0.474843	2.1739494293605	0.508324	2.08554083844689	0.482587	1.13113227883569	0.383033	1.02106366702471	0.529284	1.0562672890945	0.522388	1.02884667743753	0.388664	0.89769432886954	0.491071	0.86525487460437	0.493648	1.60080147978057	0.475219	1.64146467132192
R3hdm1	chr1	+	0.481994	3.2127191298547	0.548729	2.9702719667815	0.477273	3.0644550705364	0.494141	3.09735000574615	0.526733	3.08292051799396	0.530303	3.51032735446756	0.517915	2.9685539294962	0.53871	3.17847445903758	0.496839	4.68523478277666	0.495294	4.75235287271113
Rab17	chr1	-	1	0.318985660385283	0.8	0.313524698535545	NA	0.206942445029054	NA	0.150214505089019	0.967033	0.441288974915091	0.886364	0.525706690690869	0.942308	0.700563222953441	1	0.493797926445736	0.716381	1.71523710857998	0.563441	1.56025367375277
Rab23	chr1	+	0.509792	5.194694414969	0.54238	5.27822931438367	0.553516	4.99271441026208	0.542474	4.96906319272505	0.568517	4.98012052022614	0.556739	4.9577482062437	0.600497	4.94283050400553	0.546465	4.91075579314985	0.584222	4.19795876402384	0.57055	4.13221119999631
Rab29	chr1	+	0.623549	4.75076005132864	0.616997	5.03016433306796	0.567878	3.31707030160502	0.633229	3.79639533604066	0.480885	2.62726261025913	0.592233	2.66643061840058	0.601423	2.14164474509191	0.550186	2.07949103291345	0.688259	2.04930214505569	0.545455	1.72422137776308
Rab3gap1	chr1	+	0.472344	4.72955907172881	0.448094	4.63898072766245	0.439247	4.72060300135977	0.428571	4.68154439823432	0.473103	4.84702726679204	0.458259	4.9360329919566	0.506757	5.230472946828	0.469153	5.02935066953092	0.440633	5.23104227509549	0.504705	5.08367343095073
Rab3gap2	chr1	+	0.433772	5.15022663496969	0.417385	4.92670935321858	0.429885	6.35162410706363	0.41043	5.84139702289687	0.414963	6.42600102060524	0.444142	6.6942593966069	0.413537	6.14291054102786	0.42072	6.03158085611801	0.448501	6.40924655034726	0.43036	6.28428940759538
Rabgap1l	chr1	-	0.5	0.686444474312787	0.497409	0.712130631601165	0.577586	0.628249631588561	0.420382	0.677271373538842	0.488479	0.74493157600433	0.464	0.831938325215411	0.513699	0.847179386206913	0.622517	0.801542110086665	0.431677	1.54981140986511	0.427273	1.7224442997046
Rabif	chr1	+	0.508958	23.2118420223516	0.513728	24.1536689398433	0.534706	19.3074914249268	0.51214	19.7192634564167	0.493865	16.8758096885163	0.510147	16.261618629748	0.522602	18.1541702005934	0.516432	17.5166168226273	0.502247	14.4499621879135	0.538538	14.5750925147559
Ralb	chr1	-	0.480307	12.2318162740899	0.449064	12.8693789703712	0.488154	8.14999584307097	0.492903	8.51250060907909	0.465047	7.15452058336478	0.473992	7.87792890842814	0.470884	4.10610311821955	0.469619	4.18309047662994	0.484447	11.9751863241585	0.462319	11.6581993384965
Ralgps2	chr1	-	0.65839	2.62639434872573	0.688779	2.59509846410713	0.676471	2.38882388928874	0.660714	2.45538877412369	0.650624	2.59859138342181	0.685514	2.64840063088025	0.735602	2.73026657995666	0.647514	2.66214237599101	0.628133	4.57431545566284	0.596911	4.2639343844083
Raph1	chr1	-	0.522496	3.28287969663507	0.517837	2.97275966533937	0.51053	2.76333735934476	0.550518	2.86787469480252	0.572612	3.90410280745607	0.584853	4.50568940178195	0.598882	3.52455513928196	0.555009	3.72895095816407	0.570205	4.02174151509568	0.595859	4.05943575951986
Rasal2	chr1	-	0.591276	2.91349522821772	0.524	2.68536494854254	0.608511	2.66643984901738	0.533528	2.83111704787863	0.558065	2.99573549132424	0.507523	3.14039484816619	0.582363	3.10069289511901	0.558824	3.09317816909683	0.48799	3.48041629730957	0.541242	3.76404746771246
Rassf5	chr1	-	0.714286	0.246256873072488	NA	0.204151595681574	0.5	0.184558269384794	NA	0.181869502384413	0.2	0.314845142561197	0.434783	0.360177359568366	NA	0.359333539477174	NA	0.189959468556089	0.493976	0.893556884432483	0.469027	0.886258373920947
Rb1cc1	chr1	+	0.410687	4.1725478878165	0.463849	4.45737635797937	0.459091	4.60741364771069	0.42449	4.88527429389167	0.438725	3.70932372106454	0.472406	3.9027965509733	0.429338	4.00957455156185	0.440079	3.90447287361921	0.478992	2.86614330334511	0.441349	3.42686125901509
Rbbp5	chr1	+	0.528109	36.0477196039911	0.508774	35.5723311544964	0.48614	32.9167234231844	0.487378	32.6225006956544	0.487599	27.9930819082856	0.495281	28.6902682920165	0.507964	21.7954641872369	0.497085	22.4312939824364	0.513158	22.9023512482043	0.496975	22.1856306441934
Rbm44	chr1	+	0.133981	0.882137310434357	0.115438	0.948785281599725	0.168831	0.812299895743648	0.138583	0.87990024613359	0.240246	1.01991374081135	0.200602	1.06849336353325	0.172794	0.524182675819487	0.231884	0.580231242114725	0.150655	1.98403361349126	0.1315	2.01210877824386
Rbm8a2	chr1	-	0	0.277991659406096	0	0.192200316380007	0	0.308093684975991	0.0227273	0.251592455832953	0	0.312068481363722	0	0.151974070538002	0.0178571	0.239768042905564	0	0.215478235415164	0	0.32556195025376	0	0.184775251620538
Rc3h1	chr1	+	0.567981	9.70203306059147	0.521092	8.82705861022277	0.487081	8.23077980563306	0.4764	7.98918528666675	0.49285	8.39265834992102	0.495264	9.15647269266165	0.481439	9.45435205156505	0.491014	10.0709588078589	0.505212	7.52374372401471	0.517076	7.79788163940158
Rcor3	chr1	-	0.833333	0.937482076772665	NA	0.92864636367603	NA	0.800998063499535	0.4	0.869506219811272	0.916667	0.796963612515133	0.833333	0.888181451299433	NA	0.728898722769535	NA	0.795555687044867	0.631579	1.08824525032954	0.785714	1.08377039062169
Rcsd1	chr1	-	0.198161	4.55869552220233	0.194954	4.65854518127575	0.239353	4.19233099086806	0.243703	4.00702493053965	0.295666	3.98916347433312	0.301616	3.97409719309147	0.33756	4.69450491942388	0.335317	4.83454354143134	0.389914	2.35676918022942	0.386218	2.27415012860021
Rdh10	chr1	+	0.527607	2.62274438662751	0.547529	2.28433244154722	0.529545	2.03451534913691	0.490826	2.19085689116972	0.523282	1.87273069520397	0.430303	1.77434841865107	0.48926	2.42149585100963	0.572519	2.35637881863141	0.508046	2.35929208447943	0.51711	2.30362453466094
Ren1	chr1	+	0.440994	1.91737910527304	0.465278	1.68501299871111	0.45977	1.87362842241227	0.516588	2.01651867905862	0.512931	2.1551786538928	0.496269	2.31934260143579	0.628571	0.832517476193646	0.553571	0.910915518112414	NA	0.287531422193414	NA	0.234461777166228
Rftn2	chr1	-	0.538462	0.221739897972875	NA	0.179381349856962	NA	0.0833797229971433	NA	0.0679560084340716	NA	0.132882776145868	0.190476	0.126417265931944	0.384615	0.166661455679325	NA	0.158877066179746	0.545455	0.146072427156204	NA	0.154404255569811
Rfwd2	chr1	+	0.600726	3.34363292475062	0.61037	3.17333676375712	0.615426	2.98666824683838	0.613519	3.25219205991056	0.629921	2.79909123151241	0.590702	2.89525701136868	0.600162	2.69233942035418	0.591459	2.74394569349999	0.601394	2.75655097810933	0.586658	2.81415909068195
Rgl1	chr1	-	NA	0.507102347283496	0.214286	0.445015545667466	0.333333	0.557661501913209	0.189655	0.519867891942653	0.360825	0.615664246268177	0.255172	0.613821664690865	0.26087	0.534140853653962	0.370968	0.631036194306466	0.416667	0.634608949252248	0.354839	0.649405766548874
Rgs16	chr1	+	0.571429	0.530073878132188	0.560976	0.549730703968469	0.589041	0.952806723441276	0.482759	0.746255899587174	0.450794	1.2543058965062	0.411602	1.1345036546631	0.358974	1.97505721943997	0.320261	2.27672212864834	0.433036	1.12322526536219	0.487879	1.2633512684244
Rgs2	chr1	-	NA	0.0384566625605207	NA	0.0405158176086415	NA	0.0213104502945552	NA	0.0309374787156044	NA	0.0817972367894723	NA	0.0420474165384298	NA	0.190168384071253	NA	0.21041444970478	0.467532	0.615511354667106	0.446602	0.642685136086748
Rgs20	chr1	-	NA	0.00365605921488319	NA	0	NA	0.0395065283415339	NA	0.0352945617052755	NA	0.142567881846242	NA	0.12711829721788	0.142857	0.54111557821766	0.5	0.508102002846915	0.6	0.327549191457538	0.277778	0.388816995625194
Rhbdd1	chr1	+	0.456863	1.83769407404838	0.531783	1.77729124846486	0.473575	1.34813377706428	0.461098	1.26002497292012	0.449286	1.69884852526421	0.527796	1.77770392743794	0.510851	1.18588117517181	0.452297	1.21242944499142	0.521422	3.40802511835406	0.51832	3.23811788726484
Rims1	chr1	-	0.733735	3.04488230247723	0.741208	3.06839505894123	0.767956	2.40903804757763	0.735404	2.47771188118654	0.75502	1.46973536937717	0.742623	1.60834931599879	0.766234	1.07389668098322	0.781095	1.13781316482309	0.807018	0.569112638038935	0.748718	0.633537518298457
Rnf149	chr1	-	0.461538	17.4202719125894	0.524129	17.643942604466	0.46181	17.4531123663708	0.485253	18.6797400556717	0.496702	16.141427074307	0.497379	16.2536911036886	0.535807	17.2613221433923	0.528855	16.4215799745497	0.53998	12.7299970773048	0.575023	12.6895934078034
Rnf152	chr1	-	NA	0.139867404584566	NA	0.123435056846018	NA	0.123808920610737	NA	0.143207311813652	0.508772	0.329694379008293	0.586538	0.396815840509195	0.457944	0.917458421278309	0.380392	0.948152369460844	0.682628	1.43432847883753	0.687609	1.42675798905522
Rnf2	chr1	-	0.636079	39.8810593230604	0.65625	40.1738113893571	0.675336	39.8326473656969	0.678079	42.7506404908458	0.693293	36.0048497973448	0.684276	35.3100429409055	0.648111	32.7766865276311	0.652113	32.5873706916423	0.571186	22.0433079955505	0.562923	23.3830461746673
Rnf25	chr1	-	0.561135	7.79520605595744	0.502431	7.86073737785266	0.551471	8.41091522107084	0.494949	8.24898718936575	0.528409	9.51193225929773	0.538278	9.08090015653236	0.506579	9.96554479842638	0.552962	9.62665885006976	0.56049	9.29348941677357	0.578947	10.0616883987178
Rnpep	chr1	-	0.592593	7.18369574723403	0.623741	6.96631795998409	0.622535	5.40249695229319	0.622485	5.64330296501406	0.604639	6.21456567950011	0.574361	6.31853163582496	0.604651	5.07170753149824	0.560221	5.03410162280223	0.643655	6.89895496389109	0.566285	6.74781709553465
Rnpepl1	chr1	+	0.493943	2.56854514985267	0.544601	2.4124447503618	0.532967	1.81523302512731	0.491228	1.55534767427283	0.523109	1.53905298408805	0.48556	1.51963636066063	0.599265	1.23857530299455	0.5	1.3346103793623	0.5171	2.23161420067785	0.521632	2.13893058629445
Rpe	chr1	+	0.635734	60.6927545229519	0.628716	61.3790135959274	0.602458	61.0133868428836	0.601719	61.0373696682306	0.626314	46.3702570703961	0.630747	46.9651138089013	0.592226	39.4699944295303	0.618102	40.2983347793063	0.670563	43.6056661730144	0.652447	45.5899079250778
Rpl10a-ps1	chr1	-	1	68.7458709013647	1	69.0564233283142	1	66.0457287948863	1	63.196896028621	0.997727	63.2739565142245	0.99591	64.2048620297222	0.996689	67.6937775447324	0.996644	64.5183467274598	1	91.6037803623554	0.989933	93.4445337916877
Rpl30-ps6	chr1	+	NA	0.222672916837498	NA	0.17594692345132	NA	0.592283549565914	NA	0.214962136592906	NA	0.44204981797529	0.848485	0.730392623490829	1	0.645306749957906	NA	0.536073135368558	NA	0.195582744899215	NA	0.0676599033027585
Rpl37a	chr1	+	0.204166	598.240074097659	0.202614	643.49719076445	0.203689	634.424676245153	0.202741	555.436394946547	0.199179	628.146519598894	0.201028	637.63516159831	0.207947	624.864669693829	0.202712	638.097599813474	0.196508	661.467809209921	0.191787	656.899342414592
Rpl7	chr1	-	0.698653	435.484978601682	0.693912	442.028437121634	0.691255	414.070344992099	0.688491	420.08657540508	0.682348	403.4638912514	0.678697	403.016112464158	0.689155	398.027220708126	0.699029	386.759002048947	0.702196	461.641544627928	0.690047	467.425332179963
Rps6kc1	chr1	-	0.469453	2.66494288521872	0.498555	2.42504387922151	0.500808	2.38441099138843	0.475771	2.2027605533755	0.452816	2.83698389493843	0.511775	2.70850369600504	0.48201	2.57049507359272	0.49883	2.74560939606465	0.489005	2.44833214729641	0.490485	2.36640876460563
Rqcd1	chr1	+	0.467617	52.1043451013955	0.464519	52.0306967743535	0.475336	46.9158697876161	0.457228	45.2438551119819	0.459105	46.7065856550441	0.451405	46.0627052376929	0.460053	50.5950176752151	0.464916	49.9606507494458	0.458506	44.4133754727004	0.452391	43.0818863744627
Rrp15	chr1	-	0.514202	30.6419932745115	0.51218	31.6034353769124	0.472396	34.2675988334527	0.470786	34.9860666411206	0.471331	33.9684470500271	0.463023	33.9854326053504	0.494679	38.4694241193977	0.500052	38.688805474162	0.466582	29.2087944929447	0.485997	29.1430985534375
Rrs1	chr1	+	0.660989	51.8064197711904	0.685161	52.3859283918205	0.676819	55.296451114301	0.659622	57.6575053461631	0.674879	50.6428873008625	0.673667	47.9162668256416	0.668994	50.1578355364882	0.669897	50.2654229504229	0.686107	39.2756891586027	0.680628	36.6980972398228
Rxrg	chr1	+	NA	0.0134941532537134	NA	0.0106625214385824	0.351351	1.23942488109532	0.333333	1.16156292529001	0.391304	1.23418747612082	0.473684	1.01803440285948	0.577778	2.08100289811663	0.628571	1.73507187281595	NA	0.468172470419609	NA	0.456152051609281
Satb2	chr1	-	0.441281	2.46352088653936	0.492837	2.30738267686491	0.420561	2.94156734896006	0.419048	2.74592911961858	0.390782	2.82472401363409	0.517103	2.75744950681569	0.432292	2.0322355009618	0.351351	1.89131840264841	0.5375	0.912450554724267	0.438095	0.750977082297648
Sccpdh	chr1	+	0.90249	4.67892276278029	0.897651	4.74322378996411	0.864952	4.99818547656361	0.833333	5.34193132882028	0.763251	4.03080889298071	0.769984	4.06306154377081	0.724138	3.21573271868546	0.724739	3.09718828569287	0.614512	3.76766544315714	0.600382	3.69749471566582
Scly	chr1	+	0.335805	2.19064333098377	0.415816	2.15090762626892	0.384917	1.98230754938251	0.436433	1.85276664135737	0.387937	2.39134194781972	0.37199	2.38922682479728	0.446374	2.29905348645619	0.429273	2.44567365309094	0.367558	4.24924903140892	0.418043	3.92341172407449
Scyl3	chr1	+	0.564014	3.68619240200069	0.530726	3.72527126240158	0.579832	3.49918916098249	0.588391	3.5563970168137	0.494624	3.49793387504956	0.496288	3.79030718458815	0.576305	3.06322890968347	0.515556	3.11302412068401	0.54012	4.41551811834926	0.48433	4.59590563437611
Sdccag8	chr1	+	0.644068	0.611813927570367	0.826923	0.560541586303717	0.547009	0.536626969950614	0.693548	0.56163999262879	0.738318	0.582802835822108	0.69863	0.630362974488263	0.803279	0.512798167423215	0.8	0.501101324009941	0.617647	0.474741705613438	0.621212	0.570250577606199
Sde2	chr1	+	0.561562	26.0800986760152	0.567812	25.3456029345924	0.570068	25.7123752183204	0.555944	25.4708146394864	0.557463	26.6297491037007	0.556085	26.6054319482591	0.559147	24.8070607184707	0.548912	25.7298256603045	0.560779	20.90318055597	0.568261	19.5772789871083
Sdhaf4	chr1	-	0.294	7.55396214538339	0.329609	8.19663036069103	0.276243	6.51478021024247	0.322674	6.76171517072332	0.340675	6.95242196554729	0.306971	6.63069477325587	0.325843	5.32235675104216	0.247126	6.03475382719662	0.298578	7.92768026761731	0.330422	7.58363781160736
Sdpr	chr1	+	NA	0.00507300655053678	NA	0	NA	0.00421674867530561	NA	0.00816222842709563	NA	0.00719351585949969	NA	0.0099840248631676	NA	0.0420045356998553	NA	0.0388595196476062	NA	0.271805597952244	0.285714	0.265900097889662
Sec16b	chr1	+	NA	0.143235074047041	NA	0.153922661610057	NA	0.233355339353003	0.0769231	0.239676822167913	0.339286	0.349344255409677	0.544554	0.41344812757455	NA	0.246092423630633	NA	0.260190496420525	NA	0.266715574633724	0.3	0.274191445473138
Sema4c	chr1	-	0.385802	1.9165869555309	0.488064	1.83435298064049	0.535248	2.12879706229512	0.513359	2.03317769167625	0.534375	3.7248997725181	0.49	3.67678978768697	0.474747	5.82179046621537	0.526087	6.12946042079268	0.516411	7.34420233256557	0.533012	6.68997789808725
Sept2	chr1	+	0.520038	48.8637757606358	0.515137	47.8478959107755	0.514716	43.6095022335903	0.4924	44.9194083665753	0.499257	42.5669922476719	0.514241	42.8038674264432	0.496861	39.010597139462	0.505267	38.3738678383996	0.517942	43.877855129462	0.516213	45.9389459260134
Serpinb5	chr1	+	NA	0.0225425963809307	NA	0.00445305668080432	NA	0.00936884887495174	NA	0	NA	0.0119870132458754	NA	0.014788458645807	NA	0.0233316102841923	NA	0.0370023374099024	0.818182	0.232651009132477	NA	0.214051330448727
Serpinc1	chr1	+	NA	0.0417101340128091	NA	0.0401223220713706	NA	0.0542660916580986	NA	0.048143871921229	NA	0.0797170511904889	0.222222	0.105882145259808	NA	0.0900939783967175	NA	0.0833483495366981	NA	0.0446000062321073	NA	0.0509705660499836
Serpine2	chr1	-	0.358067	2.55277154473629	0.326619	2.65842701389033	0.321717	3.02817204194017	0.363919	2.9397959290874	0.350308	3.70733859649796	0.365508	3.78611844749733	0.34749	3.71639019851984	0.366895	3.5936665329717	0.391448	6.49335657111464	0.402188	6.45821819139558
Sertad4	chr1	-	0.72	0.587717691359979	0.601307	0.617066425768599	0.809917	0.659165438701962	0.554745	0.637962953950792	0.549575	1.13591220758533	0.658915	1.14610554505005	0.543967	2.32066195148127	0.631236	2.33907632912598	0.525763	4.67423456038197	0.510266	4.85284944888757
Sf3b1	chr1	-	0.486402	60.1997111961403	0.494992	58.9720606971935	0.478486	54.4336711612796	0.49262	55.1017719525088	0.491636	46.2659703420069	0.487995	46.5091821786657	0.472663	48.1778771067329	0.474268	47.8711638272043	0.482592	51.4403880322638	0.485954	56.4629569514929
Sft2d2	chr1	-	0.445221	0.877913944026732	0.405013	0.929932873144116	0.490432	1.63116883911055	0.518672	1.50654452867866	0.523716	3.60167492870853	0.47033	3.7070025952622	0.486607	4.28440094584219	0.491119	4.24133830682019	0.502661	8.45115030151667	0.510815	8.12865746031482
Sgk3	chr1	+	0.35	0.212257344862722	0.322581	0.219058898978845	0.449275	0.452779687173398	0.519737	0.504427256729997	0.508016	1.07876976751569	0.474208	0.992480626834763	0.514658	1.48848858846116	0.512048	1.38178085510973	0.465714	1.55805825698316	0.457207	1.70780385092835
Sgol2a	chr1	+	0.591614	15.9956884838001	0.603389	17.0624773841023	0.578448	17.6327766011896	0.587088	18.5495726974313	0.584648	16.735401015173	0.585489	17.6628637260017	0.598559	13.3323487338242	0.598101	12.8980544255213	0.579225	13.5270798673088	0.59069	16.1865817703535
Sgpp2	chr1	+	0.9	0.274952645138476	NA	0.250915612574057	NA	0.193135940075842	NA	0.190038990321265	NA	0.13179125007959	NA	0.134646292330483	NA	0.100202911484147	NA	0.118656504271301	NA	0.14286043975247	NA	0.111785927195862
Sh3bp4	chr1	+	0.667879	14.8310616741325	0.659792	14.7420392679171	0.636227	16.2639880924375	0.615643	15.4628084639952	0.611699	19.6418655035358	0.610775	18.7430406037136	0.633406	20.2294577284339	0.621738	20.0878707223734	0.656327	23.8805613293092	0.61854	23.2485621964778
Shcbp1l	chr1	+	NA	0.112788934048794	NA	0.118828197142757	NA	0.0937516211543351	NA	0.188193266753035	NA	0.183628549723428	1	0.252121296320026	NA	0.155648882623655	NA	0.150851847257352	0.851852	0.638432688363193	0.916667	0.523589170841563
Shisa4	chr1	-	0.518072	0.967826007773105	0.481752	1.18002318785168	0.505747	1.09216057759596	0.61	0.979686825994139	0.440945	1.36783157075729	0.564286	1.32449362096054	0.666667	0.908827975038199	0.675676	0.981934098622308	0.603175	1.67764375326949	0.609756	1.54828691875444
Slamf6	chr1	+	0.333333	0.343383345905979	0.425339	0.347072849221663	0.391304	0.111791332818271	0.633333	0.126611745888362	NA	0.0943401845652582	0.528302	0.10043168289625	NA	0.0784846334684507	NA	0.0751524578118402	NA	0.0113102872419561	NA	0.00652113543649187
Slamf9	chr1	+	NA	0.259677662042328	NA	0.242493185588354	0.347826	1.29508459314832	0.454545	1.32939264975963	0.666667	2.06706746566663	0.347826	2.42367969904387	0.5	1.57594987591722	NA	1.34331917989745	0.6	0.798299349934402	0.692308	0.753173759842436
Slc11a1	chr1	+	0.198347	1.07503238813919	0.188976	1.11717036027196	0.155556	0.688439704778842	0.153846	0.602358138220662	0.141509	1.45321640565156	0.139785	1.42695653599892	0.0989761	2.64527248178233	0.134948	2.55878736767308	0.229422	7.52824115605261	0.191693	7.4036917670727
Slc16a14	chr1	-	0.466667	0.679657263349585	0.512821	0.759889147201693	NA	0.345881577647756	NA	0.386829238642127	0.559322	0.491710716380628	0.814815	0.494400849342408	NA	0.454607934572289	NA	0.50088933770117	0.575758	0.560421583594265	0.58	0.540875527715011
Slc19a2	chr1	+	0.557561	21.5591477145597	0.534917	21.2723956357573	0.544934	20.487949090013	0.531132	21.5084235982633	0.523936	19.2220096461022	0.517833	18.946026878956	0.535104	18.3224266275549	0.52097	17.1582512353348	0.51402	23.6109446488972	0.528889	22.972035631886
Slc19a3	chr1	-	NA	0.136524288848622	NA	0.167806866764404	NA	0.0546388821010644	NA	0.0732203819259361	NA	0.139815896750423	NA	0.172491809653377	NA	0.167469959625524	NA	0.26559589658005	0.860577	1.00817321475095	0.819277	1.05628919185546
Slc26a9	chr1	+	NA	0.228348391870555	NA	0.180431448939976	NA	0.268686610243665	NA	0.260044130796088	NA	0.161898842633889	0.3	0.171202018383338	NA	0.208716567314579	NA	0.214183066714418	0.272727	0.200567747122822	NA	0.135164445174282
Slc30a1	chr1	+	0.418856	17.2446671041909	0.367323	17.1522079770016	0.414322	8.36702164256631	0.39433	8.90625352655751	0.369231	4.94506203697758	0.383648	4.98465387778972	0.482993	3.72564972572951	0.43609	3.85499815756611	0.513812	4.58164887765048	0.520362	4.67186213320157
Slc30a10	chr1	+	0.0847458	0.480662155098023	0.0714286	0.493109643586325	NA	0.216321519174048	0.173077	0.30122692821398	0.0851064	0.261710978594692	0	0.282224911185188	NA	0.277602585522379	NA	0.247009834634587	0.3125	0.317222075071625	0.268293	0.322764172026867
Slc35f5	chr1	+	0.221739	4.95454772876723	0.13961	5.07484258912705	0.215827	4.1836537601273	0.215017	4.39916085624198	0.190625	4.23019372496245	0.214706	4.20990796699818	0.276471	3.22871679021564	0.341935	3.20714045914369	0.439898	6.23985707237995	0.423267	6.12935550264969
Slc39a10	chr1	-	0.517969	30.571431492691	0.519558	29.8121003005546	0.511791	35.4085229126893	0.505181	35.8835465802363	0.535092	24.3432737004322	0.56315	24.0573283068921	0.531267	34.3521595512222	0.531476	33.9995021118921	0.54954	28.0626422313766	0.553701	31.0033773218685
Slc40a1	chr1	-	0.6	0.118818268424489	NA	0.119737746306072	0.782407	0.926084686708771	0.709534	0.939241228819939	0.678673	1.97297358758038	0.710398	1.78827382221832	0.654681	7.91686903962643	0.676173	7.66753527837881	0.578787	21.6545564274505	0.590855	22.4390009709401
Slc41a1	chr1	+	0.523439	13.0464932357827	0.552762	12.627343901212	0.515941	9.41247925321202	0.463029	8.78228859353918	0.4723	7.63708427381251	0.47868	7.77225779169711	0.485425	4.92774581518868	0.457578	5.45863573812104	0.486355	6.12177176921266	0.482184	5.8983953242849
Slc45a3	chr1	+	0.543624	1.19182194590452	0.547872	1.37822291741706	0.485075	1.04127537313525	0.583333	1.04277450712091	0.501718	1.77943617437485	0.436709	1.71496105998159	0.506726	2.16094061009921	0.457983	2.17525902983885	0.42053	2.41457684996652	0.508287	2.42857845450176
Slc4a3	chr1	+	NA	0.192846813149461	NA	0.226433193822734	NA	0.161794866604295	NA	0.179789241350876	0.602041	0.316902858227198	0.645833	0.30031801267869	0.516129	0.350693177024289	0.416667	0.372755841159763	0.546667	0.720283098670581	0.522321	0.714666088752524
Slco4c1	chr1	-	0.893258	1.44307294222365	0.851804	1.50204468929738	0.889488	1.00002153715675	0.872727	1.23458694097002	0.903226	0.678360417490198	0.837975	0.75403662919992	0.745098	0.418333680727165	0.8	0.421566293161582	0.7	0.293995773995201	0.542169	0.407779123817359
Slco5a1	chr1	-	0.873437	0.801032638583635	0.859173	0.755056996003017	0.733032	0.416755808883301	0.783582	0.377725961871862	0.865248	0.295257494314621	0.818792	0.3482666813996	0.814159	0.433460541598972	0.832579	0.47249311871136	0.899194	0.770932779894122	0.928668	0.676599033027585
Smap1	chr1	-	0.583643	12.8059287902441	0.629508	12.3007127236679	0.503333	11.3110833147975	0.580913	10.8565800308799	0.565217	10.1059742442149	0.531915	9.48167713944628	0.568047	8.29169534715143	0.590278	8.10730700429785	0.608333	10.3188909124224	0.568773	9.78379235020258
Smarcal1	chr1	+	0.50597	8.24144808767746	0.511223	8.09623700036076	0.505563	7.12702302138492	0.512424	7.01749298983602	0.495217	5.63024794348067	0.466805	5.53792664023326	0.468815	5.62593025129153	0.472062	6.1081095993578	0.458503	7.36713216470924	0.496883	7.19358957950069
Smg7	chr1	-	0.550436	39.533309622665	0.556011	37.3325353123684	0.56712	36.3772411193767	0.553641	35.1697853271983	0.561109	30.9992177825542	0.547228	31.593101253024	0.570563	31.3043629744488	0.564649	32.0947572550802	0.545613	29.5779590792947	0.53252	27.8789958667394
Smyd2	chr1	-	0.423018	20.0898341228841	0.452337	20.9131406871782	0.421331	17.1967686586285	0.402358	16.9786067400949	0.450328	13.6208706518584	0.421102	13.3253292605564	0.442833	12.2443724011677	0.438884	12.4090159869916	0.522549	7.79077265916532	0.557645	7.51779470300691
Smyd3	chr1	-	0.532609	2.53294322221763	0.589901	2.55611950751635	0.602628	2.40137960057016	0.605769	2.32821033611677	0.589675	2.77932772096267	0.59875	2.81299139542242	0.560948	2.03300534951273	0.541029	1.99435507599104	0.471944	4.0375229571581	0.502268	3.70208115510407
Sned1	chr1	+	NA	0.132266445681496	NA	0.100640676223004	0.666667	0.267388782952539	0.885714	0.277179077823621	0.599174	0.449202512322166	0.635294	0.425279204682326	0.56051	0.593215594426737	0.633663	0.609330627368665	0.554878	0.705655784441342	0.551331	0.573073891760842
Snhg6	chr1	-	0.666049	34.2417318063745	0.658512	34.1303868724649	0.680025	28.8218819447141	0.612233	34.7488357138823	0.652316	26.0703591601867	0.64938	25.3555608042584	0.654664	26.8601091562509	0.674147	25.646289923101	0.669458	40.5644756881544	0.637124	39.5714789431652
Snrpe	chr1	-	0.489834	103.041600130072	0.51164	108.026383944155	0.506742	100.259315885029	0.518519	120.434260483539	0.503803	99.1891854684059	0.507288	95.8831327714591	0.512409	94.7347129856467	0.516776	95.7118587285477	0.480748	85.5448134736614	0.492104	82.7529932191062
Soat1	chr1	-	0.281324	2.4661360993284	0.320459	2.57775630708086	0.406362	2.86168048888291	0.367063	2.84221615307643	0.429505	3.65409446102095	0.464959	3.65416227735002	0.479103	4.20876299038014	0.491429	4.14328423181728	0.531766	13.1982456351798	0.535776	12.2946703054951
Sox13	chr1	-	0.51361	14.5563640533752	0.504175	14.6371518704499	0.502287	13.8262221279581	0.510719	12.9477796763581	0.516309	12.3310282943858	0.512458	11.8293522044027	0.607732	11.8666831643134	0.544369	12.1728565352517	0.613291	6.7999657195961	0.563863	6.52528928281196
Sox17	chr1	-	NA	0.120164982279951	NA	0.087250796239565	NA	0.0674883026145151	NA	0.0888317965970686	NA	0.115130924930698	0.351351	0.174706487040522	NA	0.198321132052085	NA	0.138603684241829	NA	0.131219135806648	NA	0.14802376162632
Spag16	chr1	+	NA	0.0710288417162309	NA	0.0561240511588659	NA	0.0761807640630316	NA	0.114282058425206	NA	0.151078190303205	0.566667	0.130770946592598	0.4	0.256116508515861	0.55	0.230671973307346	0.525	0.462875307561595	0.593023	0.492564896279485
Spata45	chr1	+	NA	0.551313498446675	0.725	0.701840455126769	0.5	1.93487096330525	0.661538	1.84799465252795	0.741935	2.97503770776255	0.698529	2.47144077912264	0.646018	8.02024103519112	0.652968	8.78135181285728	0.727273	0.780166427479396	0.733333	0.930657958472726
Spats2l	chr1	+	0.626263	1.33952671723212	0.642512	1.40566734486402	0.459016	0.692090067369896	0.620915	0.666727482480672	0.601626	0.438649253525536	0.557692	0.536106913972485	0.678571	0.357075772988238	0.72549	0.354331548384839	0.629032	0.357200591778623	0.540984	0.346991554831384
Speg	chr1	+	NA	0.065685102475634	NA	0.0615130661503462	NA	0.157728442326124	NA	0.155590677628113	0.1875	0.196631800360094	0.294118	0.202686962642183	0.4	0.242980381413058	NA	0.189014634625316	0.517073	0.83335656974245	0.405263	0.825141754571009
Sphkap	chr1	-	NA	0.0306668053765786	NA	0.0293330384358335	NA	0.0389067745145491	NA	0.0272676403218246	NA	0.0526403240853724	NA	0.0603543765030789	0.454545	0.349141923839813	0.290323	0.362078520357434	NA	0.192804418883358	0.348837	0.263607267502208
Spta1	chr1	+	0.151261	1.40731305442814	0.116643	1.28006425018581	0.280299	7.00138011128984	0.261768	6.33875450682164	0.304676	11.9042425339052	0.310726	10.8343084871772	0.330097	19.4054908464721	0.312114	19.5616783753258	0.391081	7.58375877452025	0.389917	8.79408388829929
Srgap2	chr1	-	0.647666	7.00619767496104	0.632385	6.43885050796874	0.66223	7.80622409096173	0.674512	7.40921086597996	0.666215	7.85701317392035	0.640098	8.16765040355356	0.638933	6.05732535508144	0.628261	6.18964258743671	0.573913	7.70800317897577	0.55975	7.51267338734555
Srp9	chr1	+	0.430951	9.83416190250943	0.454911	10.2679080819882	0.462608	9.90399427630929	0.458269	9.88693925915455	0.430748	9.30051755631822	0.47181	9.03311000999806	0.485373	10.8644521223867	0.462893	10.3788740579827	0.382185	8.32329002786686	0.439969	8.11625781037313
Stat1	chr1	+	0.321407	1.11463700085513	0.352437	0.961747428106156	0.336721	0.828592598423335	0.371928	0.830017066191385	0.362209	0.836672716704251	0.348244	0.861445928505755	0.479951	0.537316640781277	0.397919	0.568098283715251	0.491525	0.344864268556982	0.442838	0.40430244259281
Stat4	chr1	+	0.632124	1.12472826403436	0.710037	0.993082242736192	0.671429	2.04278167941064	0.67263	2.08977395290036	0.693215	1.31959307749338	0.690832	1.42843066465182	0.619403	0.691828643014936	0.721739	0.700801844884516	0.557692	0.404298628660463	0.764151	0.389184237179504
Stau2	chr1	-	0.559242	2.5772632700964	0.587097	2.58821131966417	0.541516	2.68641014594687	0.511299	2.72011373555002	0.486207	2.37774112851093	0.519878	2.32966992487952	0.534161	2.13254963941498	0.544872	2.18433713317806	0.513889	2.41705139112086	0.482353	2.40621359980491
Steap3	chr1	-	0.883026	2.61690354968919	0.87351	2.72345518172901	0.862834	3.96044930459738	0.858636	3.65853143969302	0.894379	4.45484115773733	0.890207	4.0312458465156	0.902854	3.82557778861435	0.884733	4.10111937376303	0.908827	3.38229813541193	0.892944	3.38867788667517
Stk11ip	chr1	+	0.667808	6.35249423959407	0.670291	6.13468068855191	0.631043	6.70240564212767	0.653695	6.01789177657341	0.643144	6.40956291877805	0.643777	6.76978195713507	0.605439	6.84576380889898	0.60101	7.22022363920806	0.652111	6.16985742540428	0.638838	5.95508468090638
Stk16	chr1	+	0.564615	7.76959922574824	0.482961	7.61371172975724	0.526448	7.9893387567442	0.530878	7.73511606782983	0.563119	7.2402745086816	0.494505	6.9108139873009	0.481928	7.92438158058724	0.52552	7.64637168311646	0.526066	6.37843902130012	0.504144	6.6629280340099
Stk17b	chr1	-	0.517442	3.84387136456902	0.574887	3.78359521837675	0.5	6.21126673242943	0.509286	6.48037253053755	0.600368	5.93802189431648	0.59375	5.85317068026849	0.572391	7.47112135004303	0.559867	7.04543058976397	0.571036	14.0746246943426	0.546881	14.6132863938747
Stk25	chr1	-	0.566459	9.3542854132329	0.560115	9.73225038261299	0.561978	8.98781624370316	0.540784	8.85317047276284	0.536359	9.59662295819996	0.514939	10.1740626110219	0.579976	8.34866797365903	0.485112	8.4913743152886	0.512195	13.6149011921025	0.508156	13.0651599237243
Stk36	chr1	+	0.049505	1.08584958682031	0.0608696	1.13194251886998	0.124088	1.13872194167164	0.115152	0.985880409584555	0.147222	0.81766315561749	0.108407	0.87502783699266	0.0689655	0.745083756259793	0.207317	0.777229201589336	0.546392	1.13349878019452	0.467466	1.22904103982988
Stradb	chr1	+	0.497976	1.34347629857755	0.467662	1.58811982163057	0.574803	1.37769594123119	0.516923	1.42788658482703	0.545723	1.16150347707013	0.444118	1.16579359776759	0.407035	1.07879758135978	0.415789	1.06814331908983	0.512048	1.45580840944165	0.47079	1.33206833329827
Stx6	chr1	+	0.545139	1.95382767236479	0.455556	1.93065564987302	0.474474	2.07335435288487	0.539443	2.17310411508023	0.502453	2.47508477569092	0.465004	2.63997691182258	0.526099	2.44294264868095	0.472952	2.38837906928791	0.539356	2.97538777659029	0.501773	2.81343579110995
Suco	chr1	-	0.516179	7.30115762320886	0.543353	7.35056110765944	0.608752	7.01102715498005	0.599526	7.25752430383663	0.613577	6.02326828590255	0.552632	6.33391770880772	0.598949	6.86679239168917	0.617021	6.72449512181527	0.612342	6.37478823556045	0.574011	7.34746535946649
Sulf1	chr1	+	0.456884	6.86529742912033	0.46446	6.58377372552423	0.495386	5.59246199721945	0.469511	5.41147289069849	0.546287	6.15660245867197	0.53151	6.02696142293728	0.581362	7.07292373919812	0.538203	7.02161998633397	0.647641	3.95094462099007	0.639383	3.96110572549884
Susd4	chr1	+	0.197847	3.20164175854749	0.20623	2.95514213764367	0.204969	5.28242315065805	0.29489	4.82165978543384	0.326514	7.6614766274722	0.311537	7.937584432557	0.344262	7.12217360978869	0.329939	7.13895104858408	0.28338	8.00946320168914	0.307123	7.09787110013106
Swt1	chr1	-	0.648772	5.03189212939479	0.636802	5.13157237132486	0.641124	3.92923623045489	0.610012	4.15367334717119	0.60388	3.20290385019018	0.632298	3.57052476573707	0.550719	3.32654536834666	0.548766	3.18491423437481	0.564516	3.34996983571112	0.5407	4.17562317497589
Syt14	chr1	-	0.603482	1.72478131583936	0.639866	1.74045227671475	0.629202	1.46054931761433	0.636012	1.50701918378776	0.58706	1.35214040147774	0.593925	1.46814738287536	0.625	1.38489930588689	0.606936	1.41596547330746	0.558987	1.84299067905067	0.573055	2.0183578251088
Tada1	chr1	+	0.348276	1.79490624468603	0.33631	1.76984625014449	0.297753	1.59851709818976	0.185841	1.62597150909982	0.308176	1.29130173104899	0.280423	1.31355515435156	0.268156	1.09668502719645	0.297619	1.06047858736612	0.252336	0.586234294638054	0.305556	0.58434450794032
Taf1a	chr1	+	0.401799	9.05821224439225	0.437731	9.23145083600531	0.416481	9.61483463308403	0.419683	10.1077712994707	0.419977	8.76219651648654	0.432231	8.75743484305068	0.422414	9.93457835160245	0.388203	10.3769873177694	0.441654	7.8601368333643	0.402102	7.19368854841384
Tagln2	chr1	+	0.669861	26.7009853927228	0.674386	27.4974111203605	0.627352	45.44026702174	0.622599	45.5416180738545	0.624505	63.585290243731	0.612774	63.5563665353916	0.593528	65.8183661514291	0.617718	66.0292670807589	0.583013	50.8149898643737	0.579735	45.5475939827316
Tatdn3	chr1	-	0.530612	1.01243444801291	0.482993	1.01536405473114	0.477273	0.906283119813171	0.433333	0.796579001502213	0.746479	1.11221928358176	0.569288	1.18238663436953	0.675159	1.34150478190921	0.551948	1.30269655214929	0.571038	1.97885370180153	0.5575	1.9269229603927
Tbc1d8	chr1	-	NA	1.79563032109508	NA	1.88632296981771	NA	1.05732618769139	0.666667	0.871009016147016	NA	1.1074087442267	NA	1.18961844637188	NA	0.992005380951297	NA	0.945246450981474	0.545455	2.67106522203568	0.642857	2.62691931498395
Tcea1	chr1	+	0.471051	106.041079466504	0.472871	105.200327608879	0.484548	92.3741482502388	0.458105	93.7585466990891	0.443775	81.9281430953938	0.442062	81.4847992751855	0.470815	81.2232166354755	0.470957	79.3331381411651	0.424311	59.2329052510996	0.460209	63.406232603704
Tceb1	chr1	-	0.506304	38.2329251036873	0.51032	39.5705444872729	0.532772	37.726954974721	0.523541	40.0444766429922	0.546308	32.1291040205596	0.565091	31.4386087871154	0.556324	33.8832654969872	0.580588	34.6193795438235	0.551891	25.2862506252024	0.553563	25.6504372738484
Tcf24	chr1	-	0.706294	0.617260159071216	0.601227	0.616238048899764	0.726287	0.798798824897507	0.743523	0.814733669147262	0.687234	0.825482965596594	0.630952	0.805024012856059	0.700252	1.04054641620414	0.676966	0.95859263084919	0.803324	1.34404947403385	0.725641	1.42632820718756
Tdrd5	chr1	-	NA	0.279264001223329	0.15	0.293040273142161	0.422222	0.471683792644788	0.366337	0.409782224924981	0.354651	0.544890419998949	0.305164	0.606770223736893	0.34965	0.638197066660732	0.404959	0.669868368611827	0.49298	2.38224689067496	0.496021	2.28769866505242
Terf1	chr1	+	0.531367	29.3245154662907	0.531745	30.0832583492705	0.506448	30.6929934293361	0.5117	33.5234571611099	0.528744	18.7760989091119	0.517192	18.3395501153351	0.510354	17.7009225971991	0.512344	17.4489013514886	0.58699	15.3643488700019	0.56298	16.542758258692
Tex30	chr1	-	0.461538	10.4527245485176	0.550964	10.1031902549038	0.487936	10.6414994912078	0.497967	11.7104139644865	0.491477	9.51046477542476	0.5	9.40691090261908	0.525581	10.2855635290353	0.592593	10.4609411836406	0.466667	10.7995795538617	0.545455	11.253254135299
Tfb2m	chr1	-	0.120482	5.30050484179828	0.25	5.31500265566401	0.157025	5.67844460163355	0.174497	6.31393779236511	0.188976	5.12960662527817	0.255034	5.03639576607716	0.246753	5.45170449824332	0.117647	4.9414527802959	0.323077	3.89346374967127	0.322222	3.88788668322171
Tfcp2l1	chr1	+	0.613335	146.75020056607	0.610614	133.036365849717	0.659693	39.7984987610494	0.66431	37.6517638690315	0.670604	23.3080813114244	0.662981	24.2240726666858	0.703285	12.6753459717006	0.704469	13.6009465741818	0.605856	11.2385102859213	0.603906	9.70091606584936
Tgfbrap1	chr1	-	0.506405	1.72325945265272	0.471877	1.53910902276524	0.517636	1.18583566123671	0.440901	1.18064603311718	0.525	1.09860925414676	0.477057	1.05636661170719	0.471989	1.04967791893314	0.450075	1.11908576046779	0.460554	1.12031906832134	0.498688	1.1201993614989
Thap4	chr1	-	0.475926	5.63197498744701	0.480204	5.71813736386148	0.577055	4.56873302246841	0.523452	4.38352609144264	0.519695	4.89483498397305	0.450067	4.88156380556006	0.48423	4.8079616452718	0.446254	4.81544071178493	0.427241	6.6715947459316	0.4783	6.61871405663478
Timm17a	chr1	-	0.503968	15.2781211741435	0.498359	16.669202165342	0.505704	14.9712555116758	0.495097	14.74243177596	0.476067	14.1997432977239	0.508585	13.5393416404318	0.479046	15.6970332587904	0.482696	15.8678833538865	0.472996	12.6691826611507	0.492175	11.8876727102749
Tiprl	chr1	-	0.506953	8.62543662455993	0.519481	9.29910191940665	0.521901	8.8219189981845	0.563734	9.04388481123381	0.529676	8.06288898760265	0.53833	7.9006995800611	0.566061	9.27024388609885	0.522923	8.74774334299973	0.477441	10.9661561902686	0.557221	10.8328042221247
Tlr5	chr1	+	0.384615	0.242662343609966	NA	0.255655654952232	0.627019	2.40700201393267	0.588235	2.05367375673582	0.50519	2.61970877513373	0.561957	2.48339591298978	0.543046	2.06952357400756	0.586057	2.20578477966303	NA	0.0824142405646293	NA	0.0712759649406512
Tmbim1	chr1	-	0.547009	3.93970113502343	0.535595	3.69244195546511	0.498075	2.38837557671053	0.454965	2.24260917381142	0.506046	2.52589918898591	0.518461	2.69697490648363	0.427071	1.73722260198231	0.531175	1.83808382767941	0.518047	3.17974066640506	0.5	3.07084778598573
Tmcc2	chr1	-	0.521084	1.90866523951771	0.502947	1.95994733829674	0.501608	1.43034604222296	0.531856	1.36243394935448	0.528369	1.28953755754703	0.527933	1.35930019461581	0.475	0.665065665602637	0.617647	0.774674140550487	0.611872	1.04748785342649	0.678322	1.05897495879061
Tmem131	chr1	-	0.411566	20.1854785133082	0.419085	18.5009059182753	0.45789	20.1970703901774	0.470394	19.3937729769057	0.466995	19.3707060786733	0.473637	19.2118974640302	0.5	19.6906162034704	0.497972	19.9123913895528	0.512456	13.8656343485944	0.517851	13.2236332121419
Tmem14a	chr1	+	NA	2.12223277364887	0.848485	2.12105253449118	0.869565	1.97380356109041	0.942857	2.02105777868475	0.894737	1.63479436754444	0.777778	1.97922885188378	0.814815	1.95905221436941	0.7	1.74489803539788	1	1.48115927432483	0.933333	1.65568941760858
Tmem163	chr1	-	NA	0.0794400676285128	NA	0.0570638670652931	NA	0.0240114952526722	NA	0.00290489373774198	NA	0.0153608044856278	NA	0.0118442047052567	NA	0.0560594666951849	NA	0.0553195864508094	NA	0.101491586542295	0.2	0.101489854954138
Tmem177	chr1	-	0.490953	4.38824936283981	0.456861	4.38741374709298	0.532411	4.57295728908337	0.572316	4.23181372283407	0.587799	4.32814535935579	0.578842	4.57380998935812	0.557464	3.9561081191245	0.566709	3.9644702270836	0.657689	4.93816868079085	0.648053	4.53505639802848
Tmem183a	chr1	-	0.544693	33.4747119869608	0.536874	33.7483971596142	0.544216	29.1077700578651	0.529759	29.3469155737704	0.53881	25.0685197279354	0.531232	25.5317717746861	0.545759	26.8421534982491	0.555163	26.4764667372296	0.528367	26.6598378602687	0.520534	26.914972847164
Tmem194b	chr1	+	0.477302	1.27873021290529	0.496	1.32874480218405	0.496411	1.19575923317456	0.453754	1.317592163598	0.459646	1.37079518292818	0.515919	1.57720227751534	0.461735	1.45266304141212	0.492021	1.51671420472562	0.586644	3.44448901519762	0.582433	3.35320874825584
Tmem198	chr1	+	NA	0.365169355312101	NA	0.308103861800858	NA	0.313822763333298	NA	0.338582534633555	NA	0.215022635101399	0.545455	0.198956150411591	NA	0.14093075301454	NA	0.13545850356394	NA	0.119599160938369	NA	0.1410482009746
Tmem206	chr1	+	0.434034	3.45704164779912	0.462988	3.90931189242027	0.457031	3.19473158152434	0.467662	3.3306689017957	0.463592	3.97254386732558	0.462827	3.98806079520581	0.455128	4.19937820898698	0.465927	4.39464537136753	0.50762	4.89106640663542	0.51	4.63889069883873
Tmem237	chr1	-	0.537037	4.5475607129907	0.482533	4.97730205187013	0.479467	5.10649323620617	0.509841	5.51631173962525	0.495522	6.3104508129884	0.528736	6.36239541728487	0.581576	6.42559285950431	0.483645	6.02701320411397	0.565898	7.26496977076446	0.485477	7.26869576502845
Tmem37	chr1	-	0.962264	2.83716888089517	0.954545	2.8489712364795	0.948718	3.20334592539826	0.969925	2.84353422791318	0.93865	3.36096589292883	0.921348	3.77678170125802	0.92	4.06212055481839	0.941176	3.68682709700115	0.95082	5.8562038912065	0.947791	5.87294153794104
Tmem63a	chr1	+	0.222385	3.28453457954567	0.239669	3.19778441409273	0.159065	3.42128795041161	0.156398	3.15303322703326	0.213563	3.43928366838655	0.210076	3.57386378866627	0.331539	2.7567346746071	0.259299	2.8127240564165	0.42126	4.60923916015643	0.46206	4.68606585848794
Tmem70	chr1	+	0.622047	14.2207244339868	0.614357	14.9574993153445	0.63838	15.3595070498007	0.62592	17.2494122398761	0.638591	14.507908476567	0.629566	15.2841157762434	0.69085	12.8588260113669	0.683212	12.2722724829958	0.667635	12.490644837981	0.643836	12.1674068085566
Tmem81	chr1	+	0.599156	2.44988759603214	0.547753	2.69434202540242	0.630372	3.00669016483678	0.6	2.78641207581628	0.561538	2.86409227951086	0.680761	3.66780156205472	0.53886	2.1143549210712	0.584795	2.40356279921443	0.570111	5.48414792050202	0.535666	5.68222486230838
Tmem9	chr1	+	0.492786	9.86393644373768	0.515226	10.4579856458215	0.493526	9.08273124148155	0.490342	8.36980233968125	0.513083	9.19436749059243	0.507333	9.21973054605615	0.50782	6.70805192965361	0.525043	6.91192170283715	0.501639	11.6251054500095	0.491559	10.7838369285312
Tnfrsf11a	chr1	+	NA	0.152779292514871	NA	0.143226969265636	NA	0.217393297829394	0.481481	0.256230556800968	0.430108	0.339648732321866	0.640351	0.390714289618753	0.625	0.474380171505039	0.589744	0.527059192012395	0.590909	0.466261420922639	0.64	0.472093159886917
Tnni1	chr1	+	0.644342	2.59161585476603	0.605263	2.99004201713174	0.593407	0.780086791740773	0.583851	0.741141677608654	0.556522	0.485307550162872	0.675676	0.51682582038211	0.5	0.507948598895437	0.576923	0.438117953360303	0.443182	0.544502361799413	0.441176	0.546128186158766
Tnnt2	chr1	+	0.385542	0.387850721401784	0.355932	0.409144687938968	0.322034	0.249267941235655	0.320755	0.255725080451468	0.505747	0.405391551336472	0.31405	0.393462280146762	0.297297	0.34141892951665	0.220588	0.404732954018057	0.25	0.349445207682157	0.44	0.29158695169486
Tns1	chr1	-	0.485431	4.17895172681627	0.501058	3.69136425604588	0.517955	4.03362299743491	0.505632	3.39613322333145	0.518781	3.07131338240795	0.53277	3.19808500602407	0.502755	1.9687412409932	0.564621	1.98724816466465	0.539702	0.948032688017404	0.502469	0.82358288292577
Tor1aip1	chr1	-	0.506284	4.55537877060544	0.493711	4.00268510473519	0.507293	3.85321205463297	0.527638	3.83305403607285	0.49899	2.93300439714792	0.493952	2.74206090179261	0.490239	3.42410586556069	0.501326	3.4006649346072	0.622699	1.88098068934592	0.613139	1.80316270599982
Tor1aip2	chr1	+	0.575223	24.0305287942007	0.564818	23.730594119692	0.516468	17.5665916405345	0.539823	17.7170496397665	0.5	16.7908779416667	0.473816	16.6789283742463	0.51471	17.0915182138527	0.50763	17.2850517087328	0.515904	18.3558373756962	0.520787	17.8737969548325
Tor3a	chr1	-	0.39823	3.62364127975842	0.326052	3.82291254746594	0.466543	14.7390263502621	0.496837	13.8805227121556	0.492911	13.1309434881858	0.504244	12.089716931217	0.462204	16.9348254951697	0.481843	16.9071146010474	0.480738	17.3934368270072	0.487086	17.4777421128728
Tpp2	chr1	+	0.51837	16.7313575044018	0.499346	16.8220203309091	0.498251	16.8383398061016	0.492347	17.3049852417515	0.494416	15.3340518719811	0.503514	15.4362240966364	0.467921	17.2771812734669	0.513211	17.0990782506541	0.529833	16.3977442752651	0.509966	18.5260173374925
Tpr	chr1	+	0.509473	46.6255193950501	0.515392	47.0888682357538	0.504634	51.1923774809047	0.51363	51.7967406665162	0.544002	44.1669931412967	0.527085	46.9170930569163	0.514044	40.4786822216286	0.530392	39.5773301642675	0.532538	25.8062785706096	0.534773	31.4274707061127
Traf3ip1	chr1	+	0.461028	8.00787477176852	0.552561	7.88132250234758	0.479833	7.69043171389492	0.47151	7.30199507739029	0.463659	7.7112038559752	0.493289	8.09092428671966	0.493308	7.06092341136977	0.482213	7.55680368664427	0.513437	8.02011493302341	0.452949	7.38021538994621
Trak2	chr1	-	0.568339	8.27815470584298	0.592927	7.83682689564802	0.543781	8.0495370403988	0.544469	7.7571974178518	0.565615	7.13575105434548	0.552049	6.88801462497195	0.544551	7.99534751053336	0.532119	8.13276190638428	0.54283	6.97336369812948	0.589676	6.5159121493044
Tram1	chr1	-	0.47372	34.9416481972684	0.456154	33.7478886054568	0.472638	29.0113575752627	0.482186	29.2689780252658	0.45	21.6425865340615	0.471414	21.7392563636013	0.44701	21.0626443884336	0.473591	21.2984806609997	0.494457	18.7613954200019	0.446471	19.1932016019846
Tram2	chr1	-	0.42	2.84087986030889	0.430405	2.59588936969872	0.543057	2.3787818135058	0.558678	2.27980561139007	0.606557	1.94159861500211	0.57917	2.02242329194788	0.643519	1.40634161974226	0.649153	1.5454674403613	0.617308	2.01909748332765	0.616697	2.00426084373024
Trip12	chr1	-	0.490636	66.4881665891691	0.496596	63.4476751931022	0.525604	67.3727800074669	0.525118	66.4291141942769	0.515442	62.7336124969332	0.507431	63.7687694843346	0.507601	72.687027571149	0.513423	73.0017527024386	0.502816	50.5979500289058	0.501558	54.3800750967297
Trmt1l	chr1	+	0.584752	4.22793794015751	0.597354	4.19382381106562	0.59158	4.08068650531671	0.570222	4.25311396743519	0.578452	4.58339142652494	0.585287	4.5529532551376	0.556604	3.2135663141857	0.577928	3.25927908071026	0.59344	3.31568847764836	0.611588	3.2317553812847
Trove2	chr1	-	0.577329	6.9246539414827	0.551758	6.91294927447157	0.556954	7.54081373326512	0.552988	7.6301757785166	0.535209	6.08197591505212	0.525299	6.64732768681209	0.525576	8.04461866751693	0.515986	8.26195501473243	0.499493	7.47613556186177	0.489517	8.70036434384955
Trp53bp2	chr1	+	0.465605	8.32431803603772	0.444959	8.18518787701261	0.470743	8.76208973408583	0.457441	8.54233645836808	0.452726	9.20731766633729	0.47264	9.33860368141034	0.454118	8.9133959897665	0.403405	9.11308887055033	0.421727	9.60397160326375	0.455241	9.26796718006722
Trpa1	chr1	-	0.94	0.752543572005911	0.945055	0.698042488141565	0.850746	0.549977581739778	0.929577	0.605403568363695	NA	0.219091746518365	NA	0.24326546153817	NA	0.225763294445915	NA	0.242675037161277	NA	0.178818509622139	NA	0.187790752023983
Tsen15	chr1	-	0.52816	8.64121666097983	0.505641	8.66408787335516	0.576701	8.36803471474012	0.550937	8.91321667776956	0.594406	7.77941443668552	0.542958	7.78707529676338	0.554241	6.68385283886249	0.558	6.65843610305127	0.593333	6.49638693875104	0.49125	6.49960869429293
Tsn	chr1	-	0.514524	18.4619528286674	0.521326	19.0768633154112	0.512684	17.3936314634267	0.516537	18.3447347122476	0.512052	17.0688390028876	0.507714	16.5150185493338	0.539308	17.8190144069502	0.525568	18.0017912240618	0.527932	15.1339272955359	0.515246	14.8533308526003
Tstd1	chr1	+	0.333333	2.98520397576195	0.222222	2.51415368541374	0.266667	2.62992340823688	0.238532	2.73227536938158	0.293839	4.72728905688454	0.351064	5.74609227947664	0.448276	7.17843949631869	0.382199	7.04196732714406	0.458333	13.8166689268594	0.386364	13.3343856488302
Ttll4	chr1	+	0.446369	15.7508007429765	0.458017	14.5650533103171	0.471119	15.8180094206725	0.45821	15.3676202072783	0.473864	14.843032414959	0.458953	15.2510389893898	0.478641	15.7245985421462	0.465911	15.9633504304092	0.446888	15.6095085847676	0.431561	15.0349379677682
Tuba4a	chr1	-	0.352539	47.6372997285218	0.355839	47.047969629014	0.38166	43.1261960675214	0.395551	39.0877948963725	0.42182	43.0438822486201	0.43351	42.8494690207086	0.413082	47.7313777468575	0.416014	47.7209510904031	0.425584	46.7446670907102	0.43762	48.5958983084534
Tyw5	chr1	-	0.491694	5.71241675117735	0.600503	6.07498108261794	0.578947	5.54648865687247	0.473118	6.10957913005936	0.546032	4.46097893231474	0.523546	4.54766169538973	0.5	5.03264412535853	0.522267	4.92233432573266	0.510549	3.54372530693884	0.497872	3.72722215181286
Uap1	chr1	-	0.445729	15.7839623594042	0.438655	15.4241626692631	0.469892	13.7910810196793	0.437009	14.5597590557138	0.458457	12.5715208517939	0.470104	13.1048934677612	0.460349	11.6254503561708	0.45169	11.9447315197033	0.436875	15.5232722692004	0.447463	15.7235137738122
Ube2f	chr1	+	0.478803	4.33987046928741	0.49569	4.2393935619589	0.535484	4.22800828130244	0.531136	4.34582353413273	0.527002	4.1929240142447	0.528939	4.01186280230313	0.519337	4.46818676084047	0.508242	4.3232863687567	0.514178	4.24911365801397	0.502	4.24737682958936
Ube2t	chr1	+	0.519909	6.43399383978706	0.523314	6.80722333873368	0.507553	6.17981448193086	0.507182	6.49708821948974	0.488609	7.18592336552547	0.48578	7.83360599805639	0.470064	5.92223096307159	0.477401	5.92456023236641	0.464217	14.5563105516223	0.47249	14.5040596769184
Ube2w	chr1	-	0.498288	6.40983638727047	0.505929	6.17759998056612	0.52	4.77397961054526	0.500752	5.56119692197413	0.559928	4.09657596019454	0.516381	4.41329001676341	0.504505	3.85557226235354	0.456446	3.94916765392366	0.474394	3.44593786777722	0.5	3.41483511963334
Ubxn4	chr1	+	0.531214	20.7971055793809	0.489771	20.6516596776065	0.553994	19.7062042619015	0.499248	20.9134766373614	0.544113	16.3370975226438	0.507156	15.9740111901747	0.518817	15.5653615454385	0.519767	14.9136468846326	0.573553	13.6125590449853	0.555074	13.3293930556851
Uchl5	chr1	+	0.527562	34.7313033850842	0.549255	35.3626210311905	0.54028	34.9066598466995	0.540214	37.2582884075761	0.531173	34.5103690144434	0.51877	34.8172387490176	0.540358	39.4724358513891	0.525341	38.668139316579	0.521257	35.8931632196087	0.523346	38.8692593963073
Uck2	chr1	-	0.539637	56.4526703590124	0.528111	57.0115947249865	0.482158	37.33565150579	0.47463	37.6407198945318	0.504478	42.0057354117603	0.503098	42.5959844953098	0.489661	39.0707862142601	0.491525	39.4529634805848	0.486754	48.2094857392956	0.497726	47.179631964855
Ufc1	chr1	-	0.6875	23.5315575083912	0.666667	24.6397091583394	0.533333	24.1462844192597	0.803922	23.7370122019968	0.543478	22.767121494652	0.671429	21.3901301759476	0.846154	22.425678797916	NA	22.5715747827515	NA	17.1439330581047	0.625	15.492352815376
Uggt1	chr1	-	0.537582	11.4610458871869	0.535772	11.0425619745535	0.537745	10.0126702216258	0.527944	9.63240433745573	0.537039	10.7743691960077	0.528518	10.845766170443	0.518889	10.412023800918	0.515771	10.3843861017378	0.512976	9.02455579415856	0.524987	8.6750492715626
Uhmk1	chr1	-	0.510949	12.3222865709891	0.491367	11.6336861612817	0.483829	10.7497161205624	0.520642	11.1657718129773	0.520629	10.2719228533633	0.526977	10.2586831153491	0.506899	10.2507808515453	0.516956	10.4004841726142	0.533355	13.0395578557075	0.518845	13.1025519988785
Unc80	chr1	+	NA	0.0880163118947717	NA	0.0929986908343371	0.818182	0.150574099910281	NA	0.133380719502539	0.689655	0.176326170542082	0.666667	0.196049862850542	NA	0.137704726220015	NA	0.113114961980237	NA	0.152818796648452	0.846154	0.178811948106478
Usf1	chr1	+	0.469699	27.5827465607192	0.4429	27.9307903001269	0.397488	32.1411448997197	0.402475	30.0187039556868	0.428492	41.007603641568	0.434314	39.6174954375845	0.46086	60.3661762876823	0.442359	61.6485842449372	0.453934	60.9654417385355	0.450387	57.8194141732947
Usp21	chr1	-	0.516378	7.56653433507322	0.532449	7.93306055346611	0.548589	7.3593036776094	0.548232	6.76344283426461	0.534129	7.88758577648592	0.497439	8.04215721826097	0.546555	7.43676681353928	0.533394	7.63101891145486	0.44733	11.72351594791	0.480533	10.7059420165036
Usp37	chr1	-	0.520806	11.1707251728151	0.518051	10.9694848558411	0.534876	9.48404657003451	0.516034	9.68417907770043	0.547922	7.91706112042957	0.545292	8.30541244179394	0.544736	8.3871990899553	0.53787	8.3718024920804	0.534396	7.65821614352843	0.540815	7.96824959932315
Usp40	chr1	-	0.532534	3.62547748530184	0.52397	3.48880917023171	0.533333	3.27507207639044	0.537941	3.2968104213948	0.480903	2.46031149638408	0.493213	2.54112398293743	0.514451	2.51464384912656	0.463245	2.50298011457768	0.496561	1.77166234727507	0.502732	1.73949387990807
Utp14b	chr1	+	0.608754	15.9238828289896	0.605263	14.979267333987	0.617188	10.5721340947618	0.591064	10.6038842840369	0.614627	9.36685414531518	0.620847	9.5805293199933	0.615793	10.5738924652005	0.642811	11.5948527663208	0.62058	10.7212862487396	0.579134	11.4386031652933
Uxs1	chr1	-	0.542005	9.07016645879291	0.557949	9.77366001337217	0.526675	9.13908507087699	0.544611	9.55938350572779	0.510652	7.51510708793306	0.513129	7.59188750325384	0.518248	7.72599244316037	0.549495	7.31347290805556	0.539091	6.37763213643809	0.526518	6.53429797158518
Vamp4	chr1	+	0.52465	5.60848934055686	0.513609	5.32489006710637	0.478261	4.37118882750007	0.425577	4.78774595311	0.45749	4.28451477463016	0.460778	4.21827419806604	0.443182	3.49974154262885	0.473753	3.3695903645363	0.475027	3.81092014446687	0.475745	3.88129219669077
Vangl2	chr1	-	0.309462	8.90859866634813	0.365337	8.81565069370104	0.340586	7.12665816512557	0.321003	7.09897848513684	0.351923	7.1776314650374	0.391349	7.21439828071559	0.428916	4.76854388301206	0.438045	5.24067439711065	0.433353	5.55213245168143	0.457413	5.42156191692344
Vash2	chr1	-	0.666667	0.370027261526346	0.625	0.295218871281881	0.354839	0.450905713412576	0.193548	0.372820284188253	0.36019	0.871100753959651	0.344262	0.813082414244867	0.391685	1.86283762569808	0.436813	1.6668492280925	0.497436	1.99108130676536	0.520604	2.03036171580016
Vcpip1	chr1	-	0.529148	8.12021364660308	0.494019	7.67111982373557	0.534192	8.1793635231237	0.483333	8.39457020684773	0.482531	7.53578893716579	0.483725	7.86333700945761	0.508744	7.15232080828306	0.492447	7.36026680255355	0.49375	7.25239836697649	0.450689	7.93509294089878
Vil1	chr1	+	NA	0.288051340688463	0.4	0.262092043449198	0.571429	0.330125940714823	0.6	0.256307993898723	NA	0.377512714164197	0.333333	0.380799686687125	NA	0.438165801415679	NA	0.377300187848555	0.390244	1.88988780883632	0.372781	1.67425392937578
Vps4b	chr1	-	0.566638	15.320516811866	0.529855	15.3304164697831	0.563789	15.7406918962921	0.54561	16.2382470400744	0.555168	14.4504869300666	0.513165	14.3903078361122	0.553324	14.6066557112554	0.526004	14.0093633439064	0.509604	13.3695049306504	0.54859	13.8761989939855
Vwa3b	chr1	+	0.823529	2.40556206274414	0.906667	2.41689527333109	0.882353	3.27674880582814	0.892971	3.25699965072423	0.883333	4.63311638035668	0.825629	4.56819496323087	0.881137	4.67872211893251	0.867454	4.76097657353553	0.776471	2.82310220075169	0.816074	2.66014218410426
Wdfy1	chr1	-	0.296905	16.0116104631162	0.309896	15.7131884072386	0.340149	11.3652165644741	0.345793	11.1995008106783	0.403232	11.1676173805015	0.411018	11.3501932961562	0.398519	10.0154119708876	0.429376	9.75793118746676	0.411737	17.0198950328177	0.415255	16.2057774002878
Wdr12	chr1	-	0.486538	15.115607548192	0.507509	15.1867670816741	0.507704	16.9714875322604	0.513478	17.4048665546418	0.496772	15.6140331188502	0.493307	15.6498817231365	0.490469	16.5677852450924	0.506526	16.382033028388	0.512052	14.0805441363688	0.508792	14.4986428775252
Wdr26	chr1	-	0.439046	19.0881761499653	0.429645	18.4858877252923	0.445822	17.9641230721552	0.433183	18.9384162281848	0.454822	20.1644433023071	0.460662	21.8628178291685	0.43121	18.6995884890325	0.456135	18.7292507732749	0.448347	25.2512276474129	0.472378	25.3562729512762
Wdr75	chr1	+	0.549169	45.7476690636683	0.566481	45.0299453072477	0.575387	46.4888495207522	0.599229	46.9018427962017	0.588409	38.130933768053	0.579138	36.6118097048204	0.573072	46.3177103701711	0.574865	44.7036062062015	0.610947	35.4398807626281	0.626988	36.8705600895182
Wnt10a	chr1	+	NA	0.0690755207174994	NA	0.0545806177448666	NA	0.088734539081036	NA	0.116191041416101	0.5	0.120210120678856	0.7	0.127706249954928	NA	0.136487084067272	NA	0.0893323583471105	NA	0.0441249888006007	NA	0.0238509383603727
Wnt6	chr1	+	0	1.19487587454808	0.125	1.20112671648064	0.198113	4.41355272331069	0.216981	4.49341473480245	0.125	2.35602412109093	0.104167	2.24491770729575	0.277778	1.63185561208724	0.421053	1.69439307368566	NA	0.503018833322907	NA	0.413552638891587
Xpr1	chr1	-	0.602047	2.10020910703631	0.605928	1.95674234210903	0.588992	2.68306435482049	0.627534	2.64557315892294	0.587327	2.36293216458939	0.598245	2.55882516417592	0.565082	1.75655838332262	0.592264	1.87141528898004	0.570549	2.55045149892063	0.613769	2.50732162467457
Xrcc5	chr1	+	0.585523	56.7998433860417	0.595184	60.4770412115732	0.59987	58.6226841761107	0.600423	62.0267145430454	0.586048	69.7174229947079	0.58766	70.7635704765717	0.586096	63.6220138165376	0.587212	62.7000142027613	0.574267	61.7333548548904	0.586417	62.4627753252297
Yod1	chr1	+	0.396341	2.36213523190358	0.395408	2.27212711760851	0.440909	1.39584840450896	0.497354	1.37739935630827	0.448669	1.37530503094336	0.516447	1.47163624966485	0.506977	1.6961867463459	0.508876	1.55535009973358	0.418462	2.22803471313973	0.442438	2.54552720405532
Zap70	chr1	+	0.414141	2.21178507689738	0.374251	2.14876356380723	0.411504	1.57582660304795	0.403433	1.5918118644226	0.383803	3.27586268851742	0.424188	3.15342132888532	0.458781	2.26239419575578	0.348837	2.1596033322875	0.280088	3.53053001968871	0.300589	3.30913913432683
Zbed6	chr1	-	0.539654	0	0.512831	0	0.51911	0	0.525979	0	0.490807	0	0.545977	0	0.526823	0	0.516291	0	0.545588	0	0.545483	0
Zbtb18	chr1	+	0.482759	5.11803795521355	0.532468	4.95183095060768	0.575	4.65084433398142	0.560976	4.74905923273778	0.481818	3.87393916727514	0.513889	4.01514603017879	0.410256	3.74486979583867	0.511628	3.88480334515553	0.648649	4.648407259415	0.516667	5.03480951996334
Zbtb37	chr1	-	0.542208	3.68133934666396	0.569231	3.18221716855767	0.601036	3.24484906852848	0.527273	3.2683750901042	0.552966	3.36931661515364	0.590909	3.80765080459339	0.555184	3.45551577714783	0.55836	3.8391678743589	0.644028	3.62128510790643	0.630303	3.6925390429354
Zbtb41	chr1	+	0.518478	4.06085417394876	0.499158	4.34729658463522	0.568712	4.29712291702027	0.569572	4.50028351103359	0.587216	2.9916398038342	0.557554	3.29824440407787	0.502817	3.29593714922378	0.542636	3.11124316188123	0.534805	2.45836334181461	0.538713	3.14502561952165
Zc3h11a	chr1	-	0.52303	3.78778040250798	0.535543	3.57569892902755	0.522986	3.18689992819822	0.524516	3.23323583727669	0.548957	2.56710769769832	0.540569	3.10187368379139	0.543402	2.59583991057753	0.531439	2.86827934656432	0.53445	3.84383817834688	0.54844	4.02122628748811
Zcchc2	chr1	+	0.509615	8.40563634982039	0.501559	7.6722209214153	0.5	6.66738680453552	0.501274	6.56887986403968	0.492295	6.67006917549252	0.523503	6.87109905969101	0.509609	5.89619137219542	0.49086	6.29155356892735	0.492417	7.36894803926206	0.55386	6.84923178792646
Zdbf2	chr1	+	0.485512	16.6476246221406	0.508424	15.0677170286415	0.48285	22.9037789113864	0.465148	22.8397482392125	0.457438	23.3919097058355	0.464608	26.9215601147502	0.469899	17.9614371867974	0.474111	18.7760530939701	0.458409	8.82950646325733	0.472718	9.52688210770375
Zfand2b	chr1	+	0.522807	7.12804657713896	0.537535	7.01444382635162	0.490986	6.11394052921688	0.556199	5.59362534892715	0.490026	6.47999987120662	0.579151	6.38023512117352	0.608229	4.83386987899781	0.54087	5.07250816167539	0.541626	7.27488341738211	0.463745	7.44106205171647
Zfp142	chr1	-	0.53011	3.45583660502907	0.533555	3.26341798056479	0.536645	2.92699175551663	0.495136	2.52430481880857	0.503963	3.10724566899725	0.530958	3.12667477709566	0.56262	3.10073607613289	0.483934	3.37246461392616	0.556377	2.98984784308176	0.564441	2.97767927412425
Zfp281	chr1	+	0.428065	33.5544857691089	0.436262	32.2506113328943	0.407249	58.6729616625434	0.426715	61.5207963040932	0.415971	49.4252858460385	0.439493	52.2562856936258	0.417488	43.5013195139453	0.422308	43.2555850324118	0.405897	34.399490914571	0.386139	39.4295384227939
Zfp451	chr1	-	0.487925	6.48825495068133	0.495311	6.26714521119702	0.527457	6.58382116981878	0.527893	6.58615540240073	0.51494	5.9279800389653	0.529713	5.82781653078675	0.530769	5.81301642048071	0.522738	6.06358409694176	0.536901	5.29152888692308	0.525641	5.41182685364259
Zranb3	chr1	-	0.506131	6.10771773020618	0.457947	5.85925929164979	0.51105	5.00445023958452	0.522024	5.00964299029337	0.465862	6.14941217209331	0.491252	6.43686435219385	0.500969	5.85330070483273	0.504008	5.84865028607432	0.476726	7.68564573902355	0.494379	7.70634300331789
1110008F13Rik	chr2	+	0.523037	26.191733151407	0.513703	26.3429866481298	0.489912	27.1956863175682	0.490223	32.7480701423658	0.519873	33.0293500357295	0.514925	30.6711782402621	0.520435	34.8409774262987	0.518314	33.901087866448	0.536202	23.8065687791262	0.535429	24.2058429815869
1110034G24Rik	chr2	+	0.506261	2.38656561826929	0.511628	2.51628202853669	0.55914	2.07502079180113	0.565705	1.95527203695466	0.515436	1.9879265786834	0.463263	2.0699126842162	0.556044	1.8942468198373	0.554974	1.81850961487416	0.53373	1.76185223350306	0.485569	1.65720420692236
1110051M20Rik	chr2	-	0.8125	0.485617014021155	0.310345	0.567332432757221	0.565217	0.324406748097017	NA	0.251656941916724	0.4	0.394996896173998	0.291667	0.373300552850353	NA	0.351521521726946	0.272727	0.394480577122422	0.52381	1.18540739088396	0.426966	1.12251447417172
1700001O22Rik	chr2	-	0.433333	1.30632648055743	0.294118	1.15519126412903	0.352941	0.864047800205153	0.166667	0.746816088607924	0.533333	0.985302678926271	0.607843	1.0867236244834	0.526316	0.886023758550525	0.391304	0.827288031522209	0.470588	1.0546315472442	0.315789	1.08522796122409
1700017J07Rik	chr2	+	NA	0.196592410298814	NA	0.25889864423281	NA	0.108940103197113	NA	0.316307921921063	NA	0.441382270681458	NA	0.23644337951145	0.4375	0.712156709255871	0.6	0.681244584097041	NA	0.402908724375887	0.4	0.572462860502409
1700020I14Rik	chr2	+	0.500813	17.0989637429519	0.500455	17.4503421506742	0.489567	16.5610138928799	0.492612	17.9691886292937	0.465778	16.4358413419447	0.488067	17.7917522768545	0.487836	15.7469408622558	0.477487	16.1406325220627	0.508309	16.2970487771893	0.510224	18.4217894054076
1700026L06Rik	chr2	-	NA	0.124482208930842	NA	0.196721379473283	NA	0.120716426266948	NA	0.133524004523572	0.0909091	0.353031179932073	NA	0.353873759429452	NA	0.493883651430778	NA	0.340550294100508	0.666667	0.911148530454172	0.464286	1.04016911583518
1700029I15Rik	chr2	+	NA	0.183952937826586	0.5	0.327041996587261	NA	0.18157357333688	NA	0.157234915935167	NA	0.179330935058225	NA	0.256439332971617	NA	0.202290945991467	NA	0.163555089318003	0.3	0.191868413838814	NA	0.183404515332552
1700037H04Rik	chr2	-	0.4115	19.7352493086664	0.423154	19.3973863356427	0.475466	20.9180247846691	0.476744	18.9144111998441	0.502195	22.3030459342913	0.51433	22.2154380001604	0.528428	17.8157410221787	0.515475	18.1093205342901	0.524379	16.2862419020275	0.531405	15.3674997170801
1700057H21Rik	chr2	-	0.968627	4.60271628043214	0.988764	4.6383345054002	0.973006	13.0485079560393	0.965363	13.254867584634	0.9701	4.54027474449226	0.994709	4.69697996085442	0.983871	2.37040122417413	0.853211	2.57919209827512	NA	0.371074062919256	NA	0.388486274056872
1700084E18Rik	chr2	-	NA	0.0759175962793765	0.294118	0.154252138348365	NA	0.0901481259836154	NA	0.0959732982129281	0.727273	0.269127600866692	NA	0.156525848158035	NA	0.213274429207322	NA	0.189888365527841	NA	0.352459541402699	0.842105	0.288347663480615
1810024B03Rik	chr2	-	0.776119	0.27940119458055	0.653846	0.220771260794806	0.51087	0.228613108110618	0.761905	0.214235504018508	0.568966	0.235238100318118	0.649254	0.300716016477238	0.735849	0.424733891441107	0.524752	0.35351998417442	0.650602	0.295258322947569	0.73494	0.331628821821971
2310001K24Rik	chr2	+	NA	0.0628298716698238	NA	0.13238817159148	NA	0.104450004349124	NA	0.0336967673578069	NA	0.0890926660166414	NA	0.0961749422066843	0	0.151734289854967	NA	0.114590571933819	NA	0.055186050182373	NA	0.11136454354427
2500004C02Rik	chr2	-	0.388889	2.08613512735732	0.428571	1.830896965524	NA	1.72802242872887	0.7	1.92214396754104	NA	1.22317411207136	0.7	1.24069451028225	0.25	1.5315783998269	0.416667	1.61931902770009	0.565217	2.39028167673939	0.526316	2.41268849411234
2600006K01Rik	chr2	-	NA	0.209432905566079	0.6	0.278711940192589	NA	0.146596497332104	NA	0.106410844287811	NA	0.23445438425432	NA	0.144623973243134	NA	0.102677338999602	NA	0.156808151067332	NA	0.17427173741802	NA	0.133972383211152
2810002D19Rik	chr2	+	0.562176	1.7777157807756	0.766972	1.7888627205486	0.563403	2.46908204725291	0.654281	2.54245413319296	0.598733	3.0648168262228	0.616188	3.12487742892559	0.594142	3.01938486030724	0.7	3.11753761878774	0.601757	2.1019392642992	0.632911	2.11795397309194
2900093K20Rik	chr2	+	0.538462	0.60133469181936	0.923077	0.820713268331661	0.692308	0.795195506361644	NA	0.439781443470496	0.411215	1.37593435406065	0.626506	1.29105591352284	0.423077	1.07502348972579	0.566667	1.25625219601521	0.652542	2.3767960237276	0.661017	1.95175551749545
3300002I08Rik	chr2	-	NA	0.5051319866889	0.416667	0.509040962094779	0.258065	0.359021192716325	0.44	0.441703020396383	NA	0.368519026335565	0.333333	0.41782460215037	NA	0.568274045951189	0.478261	0.368508556318112	0.652174	0.887356234392053	0.487179	1.1066565005958
4921531C22Rik	chr2	+	NA	0.11030629901701	NA	0.180544621400175	NA	0.307809790820415	NA	0.259877966862192	NA	0.245793696449911	0.0833333	0.27911618059257	NA	0.154941107949803	NA	0.275902871722709	NA	0.131488877404535	NA	0.149629171005084
4930402H24Rik	chr2	-	0.473088	1.02651399928645	0.518229	0.966207602826738	0.443697	1.33547187910496	0.413146	1.38024285846876	0.494282	1.48033634512187	0.505468	1.6673262198704	0.455939	0.917974862832645	0.44664	0.999203125791999	0.464052	2.08677375734178	0.497041	2.09081098317565
4930518I15Rik	chr2	-	0.545455	0.698634185359423	NA	0.561232350266661	NA	0.387142515493873	0.5	0.449627789838205	NA	0.363242825632588	0.333333	0.488874665977092	NA	0.42180080575761	NA	0.509674069006921	0.2	0.675002927850512	NA	0.672227318764597
4930591A17Rik	chr2	+	0.866071	7.54924636264377	0.846678	7.59345859375961	0.835312	8.79203541809837	0.839252	7.34196323245134	0.821871	9.92954082307589	0.836403	9.93254685166144	0.854037	10.4469896794891	0.842105	11.5057019309398	0.945148	6.15058637989161	0.967936	6.03816439624021
4933406J08Rik	chr2	+	0.292308	1.06984071476876	0.0588235	1.0248346758305	0.183246	1.62016854657853	0.2	1.53268511575462	0.207547	1.53261851784341	0.246231	1.56231500173641	0.199029	2.08564187676365	0.256579	1.81221061467725	0.437229	2.32346752493603	0.356877	2.47145791468459
5330411J11Rik	chr2	-	0.950076	2.64141909469055	0.946225	2.68829042313311	0.904762	2.82796610414635	0.919807	2.88829434495488	0.931854	1.61215300411065	0.922619	1.62067395322051	0.864516	0.645866073435137	0.935484	0.832535583845709	NA	0.120132898356186	NA	0.136364747197065
5330413P13Rik	chr2	-	NA	0.10324963537132	NA	0.0941349101895345	0.75	0.149639113393917	0.708333	0.157604627648916	0.769231	0.135145690848612	0.771429	0.138941787755276	0.6	0.230167491272994	0.571429	0.24045619843441	NA	0.0837123549059569	NA	0.102564738966293
5430405H02Rik	chr2	-	0.355556	0.430612761950718	0.541667	0.438830176672356	0.473684	0.304408521287545	0.454545	0.304329672475857	0.235294	0.333837229452126	0.456522	0.361695130797702	0.552941	0.391536046381701	0.504065	0.400754563179611	0.445946	0.46306030508779	0.536765	0.593073927781853
6430550D23Rik	chr2	-	NA	0.0527566269928169	NA	0.0343297321207382	NA	0.0309543465031445	NA	0.0249655665246067	NA	0.0770090792227678	NA	0.0793983875532041	NA	0.0578151135896837	NA	0.0781069897602566	NA	0.201707923373831	0.714286	0.202735841614433
9230111E07Rik	chr2	+	NA	0.210207626548444	NA	0.181197127578968	NA	0.127074399043735	NA	0.092240226306204	0.6	0.257427637524451	0.571429	0.238192652356171	NA	0.316458339243053	NA	0.271852355611182	NA	0.637826441072062	0.5625	0.464525698631023
9230112E08Rik	chr2	+	0.689655	0.439234285838167	0.836066	0.423784332093252	0.654545	0.488077337347389	0.745455	0.334756071901841	0.741935	0.340919430023902	0.776398	0.488334581252317	NA	0.22491129394629	NA	0.172022600826665	0.569002	1.19800266058194	0.568579	1.02906837415908
9830144P21Rik	chr2	-	0.4	0.183858873121213	0.4	0.200382996477184	0.606557	0.500636483653332	0.578378	0.540637028338387	0.605263	1.20017242459726	0.596457	1.19159918751945	0.588235	1.22378805732309	0.656627	1.31124053104226	0.545455	1.47569161256744	0.580372	1.29551623399015
A330069E16Rik	chr2	+	NA	0.436810456930379	0.153846	0.566045254521632	0.230769	0.60997860487989	0.407407	0.730919733894257	0.37037	0.681336247064507	0.4	0.813823717754742	0.407407	1.0850382460236	0.325	0.994237927398731	0.229508	1.13565881547792	0.449275	1.00871991124654
A430018G15Rik	chr2	+	NA	0.171898812157564	NA	0.12152971385149	NA	0.0977630902742337	NA	0.109175165695171	NA	0.141119731732917	NA	0.136510509245081	0.9	0.243463242165755	NA	0.12870534757774	NA	0.0874128134821008	NA	0.103089519918389
A430105I19Rik	chr2	-	NA	0.346995134185439	0.0454545	0.36130419083111	0.574468	0.291122422667992	NA	0.281758280731945	NA	0.2023336266654	0.538462	0.229764187999827	NA	0.134258062945237	NA	0.113559520543747	NA	0.185146754116771	NA	0.307931135558694
A730036I17Rik	chr2	+	0.33935	1.23932820100613	0.300766	1.17240825450617	0.32321	2.20643649659471	0.276642	2.20791215006328	0.380586	4.01336082664893	0.403098	4.26769177889081	0.384207	4.19875374614875	0.424685	4.65984748580018	0.384228	1.72887786431883	0.472727	1.74605235794922
A930004D18Rik	chr2	-	0.898734	3.50976814212426	0.87284	3.45843522856428	0.870495	3.59998988741485	0.864224	3.63552008986168	0.861295	2.78768437608218	0.828143	2.92852414309637	0.882759	2.40274835038881	0.884783	2.60064286759453	0.915094	1.08803757908408	0.83045	1.13964274071058
A930012O16Rik	chr2	-	0.150943	0.734170380186866	0.11236	0.778779218349621	0.26087	0.710567301920821	0.414141	0.768618671399685	0.29703	0.677397190241174	0.300813	0.791724749045477	0.228571	0.458002083774704	0.363636	0.473234522898655	NA	0.229673286936806	0.4	0.259750803334925
AA467197	chr2	+	0.678118	6.40276259427204	0.68133	7.3088615263908	0.653191	1.78829752527913	0.646217	1.87587074809005	0.509434	0.584570332855104	0.507246	0.473279848598147	0.490909	0.306675883307391	0.288889	0.296049457664431	0.60199	0.995764917671412	0.528455	0.812256295509924
Aar2	chr2	+	0.414493	11.5281372467419	0.481395	11.825852669403	0.484914	12.6790458944627	0.512968	11.0434047467464	0.434599	12.6294707331197	0.434783	12.2820399026389	0.51532	12.6770836168968	0.470779	12.4650451300048	0.513245	9.04491475132912	0.49	8.85811314941343
Abca2	chr2	+	0.399586	3.38706156981633	0.474037	3.05634099350795	0.455046	2.83852210477173	0.525974	2.47682948757731	0.440268	3.12158811072845	0.496831	3.17949203002276	0.506297	2.68110142441687	0.504831	2.80624704246459	0.493088	5.9940276168609	0.478803	5.56902778500318
Abhd12	chr2	-	0.346273	10.0245880027315	0.355299	10.1940767976259	0.355497	9.45057324744401	0.359644	9.97247653445037	0.331399	8.96407505484004	0.363257	9.14423621853402	0.384871	9.16517803029633	0.333009	8.93327478175957	0.374605	10.6566615265383	0.369942	10.0046060205658
Abi1	chr2	-	0.483102	20.7562968909239	0.47753	20.9808327790773	0.469963	20.582073690998	0.485609	20.8909928818594	0.471146	18.8748882099509	0.498839	19.2094999008144	0.483778	17.2339703196666	0.480278	17.2117767391548	0.481669	16.8502684011711	0.488636	17.6008378216694
Abo	chr2	-	0.786667	0.80718932353593	0.790244	0.695210281287029	0.723356	1.38214918949483	0.724816	1.50003265941237	0.615063	1.37351193442322	0.574324	1.27617851139435	0.588235	1.19468173753368	0.763566	1.35145255774448	0.777778	0.389943097642809	0.291667	0.435349190313687
Abtb2	chr2	+	0.334286	1.17931002494321	0.365385	1.29117973055815	0.343529	1.14043058462091	0.459016	0.981798220015678	0.334135	1.03468803548062	0.370297	1.08884684948094	0.436275	0.922753196024973	0.426316	0.865964295595363	0.422043	2.13486088470758	0.448539	1.92050033220907
Acbd5	chr2	+	0.546633	8.23403063823807	0.51071	8.52850401740708	0.520682	8.14051249591452	0.537736	9.23229775283275	0.504024	5.63159731995578	0.494799	6.02828162751038	0.558087	6.18991159336127	0.457988	6.23423468819342	0.52039	5.17762236183843	0.577758	6.20949821274045
Acbd7	chr2	+	0.441176	1.92630943650608	0.482143	1.84495757020141	0.513889	1.84377534356395	0.53125	1.19747269311077	0.353659	2.15209402907744	0.467742	1.53176125333218	0.442623	2.14477255555017	0.637931	2.52315059708139	0.494737	3.02501312110785	0.516667	3.08177480467141
Accs	chr2	-	0.247664	1.51756225188161	0.282691	1.54464738105973	0.240369	1.4354590905369	0.339831	1.4190996334426	0.211364	1.30059953618268	0.258213	1.507312409798	0.224458	1.11999540041885	0.211781	1.03208237265883	0.222727	0.922802603838675	0.276276	0.774157430185795
Accsl	chr2	-	0.710414	7.2704098556313	0.747794	7.5066834639728	0.61451	4.67731668886492	0.689807	4.58473332383443	0.581774	5.0213360258814	0.590965	5.05267937309437	0.631788	3.67654033887376	0.608222	4.15357072020594	0.472648	2.16265218672562	0.46167	2.18980395359096
Acot8	chr2	-	0.515873	5.71266586446291	0.512821	5.72376342673093	0.540659	6.55091150647014	0.520737	5.78996310538205	0.509174	7.16926389843375	0.511299	7.30662216756069	0.535533	6.53203181602326	0.561453	6.55752306029302	0.460352	6.68339784605849	0.534274	6.01630231444278
Acoxl	chr2	+	NA	0.258381835681083	NA	0.250388135166333	NA	0.230979405654087	NA	0.254925213889669	NA	0.373297990355981	0.272727	0.361396156352983	0.6	0.403661077581182	NA	0.336093895159148	0.64	0.578073441671286	0.555556	0.399957503260597
Acp2	chr2	+	0.443914	3.66382393455013	0.499018	3.39088330746168	0.464789	3.3211449191071	0.516949	3.27922957002276	0.509338	3.73120635020331	0.453958	3.70531304529416	0.550827	3.74875901837703	0.536023	3.5416573914077	0.507732	3.21546178752546	0.485356	3.32118015899669
Acss1	chr2	-	0.549643	3.26630098361051	0.610663	3.23946928596303	0.384529	3.74793672744027	0.363582	3.50656985317179	0.307075	8.07869907165597	0.325092	7.91592730989374	0.251711	11.3658939088828	0.272705	12.1525966432837	0.284928	22.1533846085783	0.256207	20.7650013408055
Actr5	chr2	+	0.513587	2.86932086340531	0.510606	2.65922800712867	0.434322	2.12651159515373	0.547674	2.05513251467943	0.533333	1.94509764626394	0.531034	2.36081879839	0.522029	1.83549711221049	0.514663	1.85961938189399	0.549278	3.31696374244745	0.555031	3.38053833157318
Acvr1	chr2	-	0.559829	2.56428452567819	0.507937	2.57648381987312	0.606742	1.83802302814401	0.590769	1.74017391668873	0.640662	1.77484250793144	0.682243	1.68012386095587	0.610345	2.05613137327948	0.646259	2.04397877492058	0.561743	2.19311885214301	0.613636	1.95279175044909
Acvr2a	chr2	+	0.486559	5.29593422935315	0.449782	4.97718756079523	0.509852	5.02735297636073	0.454976	5.11780766001669	0.479115	4.32682830977642	0.484848	4.5685634699306	0.473469	3.87612071134456	0.54878	3.77306487468338	0.489712	3.08114025516991	0.550173	3.51569710703599
Ada	chr2	-	0.381588	7.07552647395971	0.387917	7.87848489680765	0.440495	5.66249107826753	0.412236	5.8228754582584	0.4291	5.92215535361701	0.447568	6.16524340522313	0.502483	5.37620552908416	0.482577	5.37076051233474	0.543169	4.19527918619178	0.562879	4.41627882326907
Adal	chr2	+	0.542394	6.15024522758841	0.527828	5.95367061870749	0.502092	5.31325797936949	0.508123	5.55271011627161	0.501848	4.75317276535401	0.487611	4.83399306496382	0.541426	3.98523167481191	0.530756	4.05724331577452	0.488417	3.19768407883895	0.497427	3.13528636737763
Adgrd2-ps	chr2	+	NA	0.133904885527223	NA	0.115006629153004	NA	0.0387142515493873	NA	0.0327853596757025	NA	0.169238134669728	NA	0.22152133302087	NA	0.204874677082267	NA	0.210240553465355	1	0.547161464242461	0.785047	0.508593037223215
Adnp	chr2	-	0.486569	0.344722647928017	0.494403	0.295275113554268	0.517265	0.378037430071067	0.497218	0.452103544101567	0.519534	0.299862044748845	0.512983	0.349671031531699	0.498378	0.24585411771427	0.486096	0.212388805849674	0.488465	0.272251180899707	0.493706	0.281667545113839
Adrm1	chr2	+	0.55	21.1972226682703	0.393617	21.7991961386873	0.527778	22.3884377731416	0.619718	20.8290931133285	0.492537	21.6803481289079	0.369231	20.2314790922466	0.44	23.3571300508819	0.627907	23.0475911918477	0.397849	16.098675953807	0.537815	15.3440273326713
Agbl2	chr2	+	NA	0.0652548842605889	NA	0.0570861777501607	NA	0.069738048016558	NA	0.0693697361095304	NA	0.0826172592134269	NA	0.0902040381685034	NA	0.0916598975450413	NA	0.0790588788018592	NA	0.253828168658373	0.615385	0.260241354387663
Agpat2	chr2	-	0.479718	15.527139302992	0.515078	17.2075099885118	0.52381	14.1582879917184	0.517241	13.5858088750535	0.524706	17.9420638795266	0.521556	17.1742258299223	0.545296	16.2438121247955	0.52354	15.2475398579733	0.542744	11.2607178578705	0.535509	10.882952502791
Agps	chr2	+	0.536883	18.6581799283361	0.527447	17.8729652630202	0.52002	16.7628158096058	0.51349	16.8323955088483	0.518106	14.9734815532324	0.507444	15.5392817671341	0.531845	15.9417295005826	0.530882	15.5624724728208	0.502265	15.4634971764604	0.510567	16.6214118508034
Ahcy	chr2	-	0.686957	45.748210302477	0.681055	46.6348543768155	0.645604	39.4088687235102	0.729508	39.2258002192795	0.722741	37.2145836064759	0.65974	37.1052576365506	0.732323	36.7015379421437	0.652542	36.5005083241145	0.717647	28.622771211167	0.648464	28.2757610437858
AI847159	chr2	-	NA	0.118155285986454	NA	0.12448188942528	0.619048	0.826619369446584	0.597826	0.784188429680094	0.592326	2.30373030932484	0.636711	2.53853663936721	0.661702	3.65853434769201	0.669173	3.55565662849285	0.634761	2.10155771787258	0.693671	2.28126497349263
Ak8	chr2	+	NA	0.148940005453293	NA	0.209219961511362	NA	0.0550226041775062	NA	0.0931923411176935	NA	0.123198080610305	NA	0.0814233741510331	NA	0.128460881503328	NA	0.0996014154342008	0.4	0.654100541403459	0.25	0.421131421624965
Alkbh3	chr2	-	0.478195	3.54703365419322	0.496036	3.76409452419049	0.455844	3.27049639026687	0.519573	3.42578468016248	0.510682	3.31486387718982	0.508213	3.72373997279966	0.465753	3.2598890437434	0.464179	3.64527880809541	0.510283	3.44299926462275	0.524164	3.21991744948512
Ambra1	chr2	+	0.592908	12.0804676701631	0.606061	11.6698162134081	0.551163	12.3013965156943	0.583933	10.8955816701697	0.55463	13.7234527939888	0.547868	13.5284080510473	0.581738	11.214188706507	0.531142	11.4466285524535	0.55	10.1638365558033	0.582114	9.38441311539339
Anapc1	chr2	-	0.564198	12.744106330227	0.565919	12.3059851040847	0.555069	12.3549802719295	0.560465	12.1500293339634	0.575741	11.0722450638056	0.562261	10.877555464534	0.572144	11.1901412552744	0.578257	11.2031103684787	0.564443	11.7214281306347	0.575581	11.4389522769417
Anapc2	chr2	+	0.49247	21.6342671617354	0.507673	21.2854816728026	0.460815	20.9779268531666	0.442513	20.020868301496	0.473051	21.8805036171688	0.484419	21.9573195858644	0.463158	19.9842522630132	0.488953	19.1796343981468	0.484888	22.4004636360005	0.493896	20.7468242361342
Angptl2	chr2	+	NA	0.103550345291024	NA	0.112991177312805	NA	0.0409868507892416	NA	0.0396684820947775	NA	0.05069277263541	NA	0.04690501022125	NA	0.0663462510069898	NA	0.0647511472333641	0.636364	0.29667842652927	0.857143	0.314641153888997
Ankrd16	chr2	+	0.484267	5.90525870010923	0.481527	5.76132054872203	0.486899	4.78679247066067	0.486444	4.61809477044261	0.512586	4.80613288427269	0.477835	5.14529680925717	0.526135	4.73689565021413	0.505584	5.13704545054649	0.468709	5.15696845359299	0.466679	5.08976931716674
Ano3	chr2	-	0.514286	0.852413397024144	0.551181	0.788909148043576	0.676471	0.651425745236409	0.738318	0.722020232690277	0.6	0.773337836172897	0.59761	0.826831164068787	0.540984	0.680020436898998	0.604167	0.643790090476621	0.5	0.973133896815244	0.707581	1.08953254096512
Ap4e1	chr2	+	0.460925	3.30498361313696	0.484237	3.18693146704964	0.447945	2.85745115533696	0.433544	2.92059260077971	0.492398	2.92455833702673	0.503817	2.94337059183876	0.5	2.9121405267432	0.413284	3.14466432736467	0.485294	3.43991170973686	0.519231	3.59065106408181
Ap5s1	chr2	+	0.412979	3.86517258730265	0.405405	3.37868969245364	0.493548	2.91012813322108	0.49375	2.59871093804003	0.45	2.93898457293451	0.442857	2.95212378539416	0.461832	2.5413534846449	0.451737	2.52347767928476	0.430556	2.8291161870602	0.539735	2.59569474815233
Api5	chr2	-	0.538913	84.9305958286338	0.534099	82.6362889110536	0.520199	82.6216004332584	0.518585	85.8536544244214	0.527369	76.3170978815188	0.523424	74.1401641072306	0.526973	73.5391693950615	0.535208	72.2668404363163	0.52427	60.152835172604	0.516325	60.7757426067143
Apip	chr2	+	0.62226	11.2205773486083	0.61518	11.3642006494126	0.586294	11.6068326499558	0.613668	11.6324610595885	0.593677	11.3397145305981	0.610043	10.4924114092001	0.560976	8.0362815172615	0.542601	8.78497160673434	0.48932	7.28271908906715	0.437238	6.32200604480315
Apmap	chr2	-	0.511561	11.023519961093	0.511041	11.3430981493429	0.494559	10.9615145970013	0.472885	11.4356669419931	0.47191	10.4631288052273	0.494655	10.1377533514335	0.409888	10.0484238999388	0.447987	9.65317018989115	0.479275	5.04584149113954	0.503297	5.35304645174905
Aqr	chr2	-	0.647666	14.6144960400134	0.637878	14.1245450534551	0.622968	16.0107714699938	0.605614	15.701723076167	0.615983	13.9508322731963	0.609428	13.6801072026154	0.640362	16.7022114027224	0.611217	16.5456555112534	0.711703	23.9617938970602	0.71104	23.8069322173622
Arfgap1	chr2	+	0.498168	9.9219765792535	0.495599	9.81360930806472	0.503773	10.0402655879252	0.542039	9.296842052804	0.522139	8.74011171686638	0.550735	8.85237492745504	0.507363	8.26083332262651	0.518012	8.44968288130295	0.45116	7.27169867374193	0.473881	6.8789963621756
Arfgap2	chr2	+	0.605279	12.4502257530731	0.606998	12.2281109012181	0.605053	9.68424485306225	0.634053	9.45125363939846	0.620868	8.81921734207519	0.619256	8.92111350223038	0.58733	9.76647418865124	0.624348	9.59075075051813	0.626888	9.21460463326084	0.601757	8.82747894134397
Arfgef2	chr2	+	0.403133	8.61669540683865	0.416226	8.37106108368418	0.401851	7.28422658608527	0.375445	6.9020738931809	0.37348	8.08007157591367	0.399738	8.13713015667129	0.366369	7.0984162959126	0.37399	7.648169370096	0.415385	9.92769984626296	0.406844	9.29475800016924
Arfrp1	chr2	-	0.616279	7.47636688999502	0.530225	7.53746845236375	0.591356	7.01958833240742	0.687395	7.09683561230405	0.633776	6.66407642257193	0.607717	6.93102022324825	0.605178	6.20826065316646	0.583524	6.73665240113154	0.660221	4.98181848382449	0.643204	4.8535643690058
Arhgap1	chr2	+	0.477468	29.2341881487438	0.475119	27.8433228252397	0.480677	31.0497896749278	0.45546	27.2804299157948	0.48	27.5203598257206	0.459809	26.3963176550868	0.462268	26.6403327952547	0.498809	26.7581717751239	0.490966	14.1284033877427	0.51937	13.1112072829594
Arhgap11a	chr2	-	0.412985	24.4503883195832	0.401757	23.9543882684115	0.430321	25.9817753379018	0.421953	26.3596312110064	0.445686	25.483643782562	0.449487	25.0420234122893	0.458728	23.2725373774338	0.433355	23.6579241857605	0.476027	30.8401562759608	0.464653	31.8210666904516
Arhgap21	chr2	-	0.499844	12.7130359470847	0.503169	12.0596613756115	0.512264	12.3597106322087	0.498804	12.1194961653075	0.493077	10.20230027528	0.49772	9.87206579673919	0.509295	9.55404400740489	0.509099	9.88368712150223	0.510267	9.95944213160775	0.499764	9.81851674971693
Arl14ep	chr2	-	0.494518	10.7579057263034	0.492966	10.524149484758	0.483166	9.54099904837865	0.495294	10.1023707671528	0.508539	11.8898100673805	0.521465	12.8690973593494	0.507666	7.59303828477533	0.479191	7.47580005296683	0.505168	8.88544226764711	0.501129	9.14703822041765
Arl5a	chr2	-	0.622234	17.6412278735822	0.645514	17.0523503474764	0.624434	15.6638960426172	0.63433	16.0221307200079	0.626775	13.3831711946462	0.638965	13.5560870919898	0.682688	14.8602062589546	0.665705	14.8398709910315	0.664447	13.5873925464736	0.676128	14.6284238411951
Arl5b	chr2	+	0.597829	7.22884947236596	0.587439	6.92854283142023	0.567881	6.73138944087711	0.563494	7.01582982514155	0.564516	6.70476136458378	0.546198	6.8472669481476	0.55397	7.3818827633069	0.565543	7.50878128610757	0.54894	7.88713864113937	0.547421	8.72236592324296
Arl6ip6	chr2	+	0.506011	25.3541660460884	0.504092	25.3933786214383	0.521886	24.0819796067537	0.522381	26.3701202457623	0.52126	23.6510319925248	0.521216	24.4829552946064	0.524808	24.2595230128459	0.518245	23.7795573840614	0.529313	29.2949522621826	0.511638	28.8201150376831
Arpc5l	chr2	+	0.485849	13.0138012983344	0.483271	12.8584734180651	0.447898	13.3404034752884	0.534848	13.9202559578113	0.464748	12.7982730537008	0.459036	12.7551688739604	0.431604	13.2446310381057	0.503049	12.5065240576841	0.512821	11.3942385069742	0.445969	11.4613589777509
Arrdc1	chr2	-	0.604027	2.35249057351794	0.55122	2.45893886836446	0.550129	2.31468422652568	0.611111	2.05147530675159	0.571611	4.35583864462504	0.515672	4.48809098543566	0.568947	6.94661514362769	0.519912	7.37159779641831	0.516292	18.8026861390295	0.541968	18.7427097235144
Asb6	chr2	-	0.466439	8.15506089428733	0.536532	8.31028471673728	0.521871	7.66203546642668	0.509394	6.49866227614848	0.524196	7.4607531881963	0.542838	7.10143062085896	0.522939	9.65555033984766	0.513644	9.62248993163992	0.531867	5.39847211988111	0.537769	5.25978310617252
Ass1	chr2	+	0.28442	85.2199323727531	0.262709	85.2749286296114	0.293934	76.2363880127986	0.276179	68.2940228938459	0.316441	78.8693994623071	0.307899	77.8702861155134	0.307401	65.6104887998982	0.30752	67.3177362551529	0.26943	37.4711909088349	0.264586	34.0797383366461
Asxl1	chr2	+	0.517181	24.3612085081887	0.522722	22.363450882681	0.528055	26.6436099543067	0.542661	24.4404540810312	0.51429	28.1418320306595	0.531368	27.9443733915654	0.53401	28.3429358069153	0.525864	28.8524497191836	0.525547	35.8108530288178	0.510571	32.4925481831064
Atf2	chr2	-	0.5	11.2860980506764	0.538601	11.2586946989299	0.482034	10.5046229690509	0.528	10.6768991449696	0.48478	10.3076307867305	0.491795	10.297460073908	0.482297	10.7250029135547	0.490954	11.1384779263034	0.459283	8.88382838370058	0.468041	9.95664195205621
Atg13	chr2	-	0.632953	16.8285668638722	0.68279	16.086769206674	0.622854	11.8971296925683	0.564058	11.2175983092919	0.609375	12.8244759005304	0.587883	12.6110714052886	0.595306	13.4588751803917	0.606501	13.3407770980681	0.601179	14.3947825615355	0.572672	13.548988575805
Atp5c1	chr2	-	0.546779	179.673236091721	0.551925	191.287724641197	0.522351	167.51543525948	0.537623	181.35819185638	0.539097	158.872426561566	0.545815	156.161434087206	0.537574	154.948702850742	0.532044	152.563533200979	0.577819	144.637007085423	0.594396	136.36853510671
Atp5e	chr2	-	0.7442	30.6695168942581	0.736853	34.2411149388157	0.740578	31.6405393774441	0.72832	31.2689114317763	0.720332	32.9768013412774	0.748616	33.0892814909118	0.735311	33.0492392543525	0.751014	33.435910526858	0.726616	39.0857190801914	0.754881	36.1833295408587
Atp5g3	chr2	-	0.570145	164.544932936874	0.556822	168.163631761919	0.541721	161.195426473486	0.539099	177.790540940031	0.544147	150.185752462746	0.554915	145.751244504179	0.535193	137.95108766353	0.532065	133.062509081093	0.496162	109.52461536974	0.519048	106.165926730677
Atp9a	chr2	-	0.402025	10.023826261704	0.411621	10.598493150515	0.409614	7.47849321320034	0.41015	6.92608948671476	0.475107	8.24153586610818	0.477033	8.44706660607847	0.483892	6.77186483214717	0.508008	6.90184998953225	0.675873	7.86569872820768	0.638263	7.05135800761634
Atrn	chr2	+	0.527187	2.60725573867499	0.509022	2.40875707571218	0.542677	2.49782179035684	0.517553	2.38538313990581	0.541822	2.26117833904441	0.527242	2.236169348249	0.474747	1.99291573875661	0.510606	2.09167702670112	0.544049	1.75619326261773	0.529412	1.71315612823553
Aurka	chr2	-	0.538979	60.7674829940715	0.545962	63.3535722997797	0.5518	58.4660034221788	0.546132	57.728247398843	0.537103	62.824468441054	0.547733	60.6488945816461	0.550965	52.7985998136525	0.546773	51.1998462669516	0.575862	73.252885892019	0.568846	69.50663638848
AV099323	chr2	+	NA	0.504821987357976	NA	0.651519422082934	NA	0.699357611458124	NA	0.825772029604455	0.952381	1.06182464420123	0.829787	1.03768093375166	NA	0.888235163506508	NA	0.902291886714505	0.956522	1.41889866266948	0.935897	1.22713466315883
Aven	chr2	+	0.541343	11.0602853344201	0.526134	10.700781575998	0.506726	10.5535370987665	0.542922	10.1966242836571	0.580277	8.70522580953378	0.561853	8.31296342518689	0.549727	7.21677357695661	0.521499	6.87396785000162	0.519056	3.4705084547803	0.610294	3.45345562832544
B230118H07Rik	chr2	-	0.563433	2.01629832982852	0.597111	2.05002574405412	0.550212	2.32774063473314	0.569211	2.54355990489391	0.534884	2.44663818582267	0.548108	2.39894383371887	0.530471	3.0106290666024	0.596045	3.0091179612409	0.508259	2.84375213436858	0.566964	3.00016221261954
B2m	chr2	+	0.447368	8.68610799503594	0.417749	9.38378136021818	0.402204	7.01029564073424	0.443038	6.82829726447095	0.548747	5.60903943452832	0.569554	5.01259964564273	0.511013	5.33439287456898	0.478673	4.94977972813666	0.676734	16.7940990078249	0.680279	16.6736030543724
B3galt1	chr2	+	NA	0.0484902885823079	NA	0.051086692322803	NA	0.0985251793732974	NA	0.0801857717935646	NA	0.231107170610408	1	0.242115061481305	NA	0.197961798539395	NA	0.170979570568383	0.454545	0.298137048438754	0.923077	0.386765788286897
B4galt5	chr2	-	0.480026	25.4559182321571	0.501527	25.1285533682342	0.448741	15.5823986293265	0.515034	13.5183640021999	0.495862	15.2119316191274	0.484513	15.1255156985659	0.488432	13.5644095130925	0.480454	13.4557207708286	0.460371	8.67690044975156	0.517073	8.07536965672687
Bahd1	chr2	+	0.517756	8.03146454196779	0.510283	7.89524849008172	0.531414	5.26997749216035	0.505419	4.83849165941752	0.554348	4.56109623506579	0.52541	4.90260075094635	0.561224	3.6249288383754	0.504039	3.82168402297636	0.445611	6.80044223302226	0.496101	6.99957947328207
Bambi-ps1	chr2	-	NA	0.235612018761839	NA	0.372341732601037	NA	0.391687516309215	NA	0.400149112373957	NA	0.445463330083207	0.3	0.377830130097688	NA	0.867053084885526	NA	0.830781646520191	NA	0.413895376367797	NA	0.477276615189729
Baz2b	chr2	-	0.314052	8.13461960405944	0.303549	7.49960868031791	0.373919	3.19712500057732	0.355723	3.28409490957259	0.353645	3.0428860169567	0.385022	3.58018847491669	0.420712	1.61826267649391	0.385321	1.63486194527439	0.483349	2.33912696609183	0.419482	2.42090546991261
BB218582	chr2	-	NA	0.141858444044758	NA	0.186817785998656	0.968354	2.10280990194855	1	1.82594840053288	1	1.39132253921742	1	1.45797733025977	1	1.06447135020843	1	1.04783506967401	NA	0.674917115121317	1	0.538801975957894
Bbs5	chr2	+	0.4	4.1391480011305	0.607143	4.38248165160957	0.4375	4.78932105831505	0.47619	4.9820222626477	0.638889	5.43787138045677	0.461538	5.31016049584999	0.75	5.83230615974225	0.333333	5.29244406750701	0.538462	5.92382937581366	0.527778	5.54694981481854
BC005624	chr2	-	0.574194	11.0943250633894	0.638393	12.1824362381181	0.688995	12.6111703929943	0.488584	13.2584451467352	0.605714	12.6195596511519	0.552301	12.358563849641	0.629834	13.1747130175639	0.625	13.3245078577046	0.627358	12.0354942775785	0.725806	11.4282527402991
BC029214	chr2	-	0.442857	0.472592548765277	0.566176	0.539388884013205	0.541667	0.417766312974312	0.444444	0.38018956781727	0.495327	0.430801419896538	0.541353	0.526561466182081	0.583333	0.442549602135425	0.476923	0.402231765568276	0.468085	0.401919700747389	0.472973	0.364695393600929
BC029722	chr2	-	0.679245	0.844474972784091	0.528302	0.705182195737279	0.477477	1.5394788050714	0.44697	1.6366405148894	0.576923	2.9188191696226	0.503425	2.71961128037442	0.49789	3.66497701793873	0.627778	3.37087857054607	0.518672	3.59911003851934	0.483221	3.49904342033832
BC039771	chr2	+	NA	0.075632252338949	NA	0.109129651311882	NA	0.0573998538646789	NA	0.0661351788796338	NA	0.104914979077522	0.5625	0.157478414658697	NA	0.125927824443909	NA	0.158330957868244	0.615385	0.161744813604748	0.5	0.157370647147218
BC052040	chr2	+	0.596809	7.90759707780722	0.562818	7.64207600303129	0.63417	6.94019723080395	0.603232	6.80869954372795	0.534258	6.87987674855725	0.553412	7.05546174585396	0.558781	5.85335595440253	0.546903	5.83771643029876	0.544747	8.16941345307236	0.525321	7.93156401513275
Bcas1	chr2	-	0.300781	1.97061107435951	0.202922	1.83931884226335	0.276708	1.78473468799991	0.30156	1.77026302050338	0.325109	1.77555979867161	0.278894	1.91221625867141	0.323864	1.98434572897179	0.278752	2.07106901772202	0.334858	3.50861455649556	0.331299	3.26520420235495
Bcl2l1	chr2	-	0.484513	12.5714544797711	0.474087	12.6704804543492	0.495681	17.0479443426435	0.477801	15.7030168896024	0.489537	15.0684981344747	0.465364	14.4325327576625	0.520534	13.1059063056525	0.430206	13.0209471782139	0.447876	9.39462480972058	0.455621	8.82833381982653
Bcl2l11	chr2	+	0.504184	2.54214872470531	0.509774	2.42965849476069	0.52806	6.65527831090886	0.4875	5.91945056073549	0.517554	8.04297385836869	0.536594	7.80416285477018	0.513424	9.70340284167973	0.514231	9.95089740793039	0.519784	10.6286128600091	0.526985	9.87837958996376
Bdnf	chr2	+	NA	0.0897425221856257	NA	0.112275476068213	NA	0.140901941419975	NA	0.122331677539923	NA	0.397671140736979	0.318182	0.385946182287629	0.631579	0.743068817157807	0.928571	0.649242127359958	NA	0.32405641606206	NA	0.41470938961797
Bend7	chr2	+	0.680851	0.606027120159737	0.54023	0.694927419548505	0.75	0.279512926914243	0.714286	0.279440526634365	0.722222	0.251515776260619	0.74	0.349083787776561	0.5	0.260074578155935	0.9	0.23453635419168	0.582011	1.0743340591059	0.476015	1.02457807791087
Bfsp1	chr2	-	0.32	0.726267749511157	0.307359	0.707085778395498	0.5	0.226381180974252	NA	0.25561606368077	NA	0.262059180793719	0.304348	0.255240133531188	0.466667	0.49665090929217	0.628571	0.475431008910357	0.769231	0.467041774765187	0.315789	0.497512611147564
Bhlhe23	chr2	-	NA	0.0430500972552496	NA	0.0242974322861347	NA	0.112463364471147	NA	0.138531154693206	NA	0.14825208181076	NA	0.117001942163007	0.818182	0.203688661211203	NA	0.148058294530364	NA	0.0324108548690127	NA	0.0233587761402381
Birc7	chr2	+	0.54902	1.34545604215493	0.737864	1.36687330557979	NA	0.437253717075097	0.825	0.545262965274174	0.533333	0.65985951940959	0.55	0.650373630066089	0.4	0.314108656730723	NA	0.309963009199574	NA	0.239908024944258	NA	0.230538312820104
Blcap	chr2	-	0.614035	7.99602857991031	0.547264	7.79504425713915	0.395349	7.24330860480885	0.515	6.85053176412543	0.431034	7.73463703853971	0.475096	8.13565693452065	0.414474	6.24118658275799	0.459459	6.76592745333329	0.429319	8.34736614457529	0.36	7.80341253477802
Bloc1s6	chr2	+	0.578846	4.86922105400489	0.546429	4.708031008578	0.556633	4.35462846207522	0.546154	4.32008286718311	0.565401	4.3710018164461	0.524902	4.45379522052806	0.518497	4.10988499315513	0.587404	3.81466988323212	0.542389	4.36411869870009	0.528571	4.4989757707805
Blvra	chr2	+	0.600798	4.37822657122481	0.652482	4.67106712133021	0.655955	3.84990360810951	0.680927	3.98093003409054	0.666165	4.29461131417367	0.656579	4.17323531490936	0.612691	4.07242001868658	0.658854	3.68170231689902	0.480737	4.22401157610133	0.489329	4.2162686430988
Bmf	chr2	-	0.606897	1.0562148361425	0.459016	0.930157327815066	0.483083	1.9913039727553	0.503513	1.90589121448278	0.460948	5.1834191106046	0.427767	5.31869322227126	0.513144	4.73611035430475	0.495317	5.24957014177228	0.459955	9.3289953477912	0.473836	8.6777786659739
Bmi1	chr2	+	0.49537	11.2510898362613	0.506608	10.8992876371448	0.529412	8.43143354181065	0.56872	9.07947271046616	0.533835	5.27008303374064	0.591195	5.02980634553068	0.6	6.07471703973962	0.539823	5.55213524023983	0.671875	2.66153960190075	0.585106	3.14317196485543
Bmp7	chr2	-	0.527228	1.72757394509247	0.527115	1.651475735939	0.415094	0.487208115169175	0.615385	0.518069981348318	0.571429	0.533137252475796	0.580952	0.554015253759473	NA	0.447010199522968	NA	0.447299550260702	0.5	2.22190563162736	0.559322	2.27313032683545
Bpifb1	chr2	+	0.0729167	0.43704715820093	0.118182	0.379193104143691	0.0740741	0.413141110189329	0.0138889	0.313677123842234	0.0375	0.209615313188172	0.0625	0.185520130233203	0.0689655	0.124172932809152	0	0.131286516476015	NA	0.0413984377923247	NA	0.0455680189232844
Bpifb4	chr2	+	NA	0.08425538701699	NA	0.0626589363464631	NA	0.160666620057335	NA	0.163472964764289	0.424242	0.217864381027796	0.375	0.156066240905543	NA	0.164149480733045	NA	0.189823844776842	0.591837	0.317785996253255	0.76087	0.380254282265008
Bpifb5	chr2	+	0.627451	1.23075415488435	0.625806	1.4662171966729	0.525	0.661027516833797	0.583333	0.708311401821709	0.545455	0.369178528494941	NA	0.279485607424957	NA	0.186175418043532	NA	0.103600517081278	NA	0.382515403829765	NA	0.338010194996921
Brd3	chr2	-	0.535854	15.9733700551935	0.493122	15.2773351339263	0.504717	15.5390263876589	0.491641	14.9814192442551	0.518039	15.5954266752613	0.51004	15.5457976667308	0.530898	14.3459109683449	0.508961	14.6961471286705	0.49364	16.5555141493129	0.509216	15.672490611222
Btbd18	chr2	+	0.454545	0.783930159737538	0.666667	0.744706978304446	0.282051	1.64367521289381	0.409091	1.43137049862034	0.142857	1.34892220669698	0.324324	1.38681197872018	0.257143	1.85976603714577	0.25	1.91329458497968	0.361702	2.75810019865716	0.296875	2.74665752384549
Btbd3	chr2	+	0.539171	6.07471455452193	0.492843	5.95122191539106	0.564299	6.37417483835554	0.536765	6.62028300380293	0.522199	5.45219557348609	0.58215	5.34404610603544	0.512535	6.03462041879166	0.488701	6.07496679587928	0.522388	7.07023496103809	0.467116	7.0441268856811
Bub1	chr2	-	0.481686	43.1695380395499	0.482028	43.5806870670471	0.495524	50.3718182434711	0.486948	53.9717887756499	0.506305	48.6136157883225	0.497832	49.0793245003631	0.487557	48.9651004128273	0.497841	47.5245053027907	0.536391	59.8402342951353	0.558807	70.8748831085695
Bub1b	chr2	+	0.491928	58.2472347452712	0.485322	59.6511681597521	0.495041	65.2696471621638	0.497855	62.7677370801513	0.470013	70.7864676940641	0.484407	70.8745528821732	0.483663	60.8150019641533	0.465675	60.708717965118	0.480965	78.9623951339289	0.487085	76.0069987417936
C230014O12Rik	chr2	-	NA	0.19410854662222	NA	0.201811237182134	NA	0.178329275718017	0.666667	0.205468093645164	0.636364	0.253515716307516	0.48	0.392072064048155	NA	0.148033453517041	NA	0.16769351990315	NA	0.197413512847513	NA	0.151331609694304
C330006A16Rik	chr2	-	0.462176	12.221164942924	0.475046	11.5258485796855	0.47201	10.848413862906	0.495266	10.2986169330725	0.459797	8.02312408251084	0.470665	7.89042886415555	0.463007	7.78444659476866	0.498354	8.08696540519817	0.503079	7.20374651031443	0.523705	7.7331754320995
C8g	chr2	-	0.717391	0.78891537903793	0.58	0.639772711341278	0.722222	0.612614783266687	0.510204	0.475997872455558	0.618321	0.942047033388734	0.706897	0.898896598866034	0.618421	0.816528223274648	0.648148	0.704275343646837	0.727811	1.65940103562447	0.735632	1.77420309062491
Cables2	chr2	-	0.530067	2.50827453749098	0.537453	2.54401568587391	0.578829	2.12134012893526	0.585882	1.8822397046199	0.632287	1.54172755745569	0.609589	1.57471187886068	0.590278	1.09914114687196	0.666667	1.20637922978228	0.56087	2.37486890451996	0.569573	2.06414954944356
Cacfd1	chr2	+	0.584112	3.03488049774702	0.578366	3.0190737468888	0.561224	2.68184047675012	0.549858	2.39898294095821	0.560947	2.78858336057628	0.576998	2.92684961558889	0.567982	2.29003259901046	0.590805	2.26221762380663	0.573317	3.0253354110206	0.540146	2.96515597538286
Cacna1b	chr2	-	0.173913	0.285268598589403	0.230769	0.235261317802502	0.4	0.287652496386946	0.0512821	0.307243206697365	0.36214	1.03227531422353	0.321862	1.01241145300769	0.38539	2.29103646549414	0.363847	2.46151890006782	0.390153	5.11805931504276	0.414463	4.89646186152703
Cacnb2	chr2	+	NA	0.0304618166245189	NA	0.0212923975703714	NA	0.0272679680742094	NA	0.0254483448672884	NA	0.0274120918270132	NA	0.0345870834105424	NA	0.0703317175750053	NA	0.0730787772024268	0.552239	0.20478524719928	0.648936	0.186898462857786
Cacnb4	chr2	-	NA	0.117579647529679	NA	0.121598306663713	NA	0.16672223536258	NA	0.143276113355575	0.363636	0.215765346833415	NA	0.248419871121201	NA	0.186121849304893	NA	0.20435297353455	0.5	0.282487558001481	NA	0.267952240057427
Camk1d	chr2	-	0.634433	4.54695277917167	0.639675	4.62168764774605	0.687783	5.36829237827743	0.663281	5.2107261848787	0.657849	5.8957264668658	0.665113	6.1465091264677	0.714861	6.57212696111124	0.706755	6.6883124018763	0.649798	5.87977506615227	0.658851	5.72234975906756
Camsap1	chr2	-	0.459779	10.069648226535	0.503932	9.56491883135479	0.46499	9.67701996157106	0.479339	9.10948293277769	0.468862	8.98035193070785	0.468074	8.69206325192055	0.460415	10.2610779783408	0.447702	10.6361084588056	0.463557	11.5856411948357	0.453261	10.7007759400832
Capn3	chr2	+	0.302083	0.0833061806332921	0.216867	0.0755769623807622	0.322581	0.0333402694883063	0.116279	0.0695000019563767	0.391304	0.0875022534372747	0.302632	0.0789399855545891	0.181818	0.0862219820625762	0.171429	0.111419540777379	0.241935	0.43360729587849	0.25	0.428912331468532
Caprin1	chr2	-	0.497498	129.049691284052	0.492404	125.477694292341	0.488266	133.846460999311	0.493153	141.983385229871	0.505187	126.582988907803	0.504138	122.225655586477	0.513315	134.619812486759	0.50006	132.229917270873	0.50755	79.1683735357244	0.523563	84.5088016419073
Casc4	chr2	+	0.430108	21.7416954127195	0.421732	20.7394387432936	0.452195	24.9022979527887	0.463167	25.461307327336	0.464846	20.5600058903557	0.446186	20.9329079570445	0.443279	20.9774894402865	0.458974	20.3263878492672	0.424625	18.2019759302441	0.421759	20.4145335965175
Casc5	chr2	+	0.469423	12.1070460822221	0.502816	12.6071758651641	0.485554	14.4536045977656	0.511658	15.5358586923325	0.507962	13.6225627586438	0.491175	15.4446077709254	0.488185	12.1007804333345	0.514006	11.9462348110767	0.485449	10.0317325202742	0.496483	12.5156880413567
Cass4	chr2	+	0.25	0.601442303611024	0.315789	0.525742865529907	0.401113	3.71926087227415	0.400127	3.32381274421383	0.346136	3.49789765976848	0.358535	3.32993309191594	0.33791	3.33800807988832	0.322173	3.51651697388509	0.462462	2.12584583510926	0.423406	1.94889442505482
Cat	chr2	-	0.566349	51.7372213581	0.568533	51.7955421736264	0.535558	57.2672232034937	0.553078	55.0911841132409	0.543078	51.8622967845131	0.531549	50.3022657649954	0.535133	51.7801248617199	0.543678	52.8902366865392	0.560183	54.2001776900219	0.546982	53.1736927315626
Catsper2	chr2	-	0.740741	0.620760265699513	0.566667	0.633008936831521	0.545455	0.533415854416231	0.627907	0.610736809188723	0.769231	0.502567830944573	0.5	0.608097817455293	NA	0.442795445515288	NA	0.527829914563899	NA	0.239463149641149	NA	0.245333527591437
Cbfa2t2	chr2	+	0.461787	14.967697628824	0.47118	14.0495225289978	0.495235	10.8016599680676	0.474519	10.3403497501983	0.45994	12.6941084491942	0.452155	12.6953147410909	0.454427	13.0066984094406	0.433388	13.7949561954567	0.466112	16.3413656789743	0.465549	15.4693535495275
Ccbl1	chr2	-	0.348285	2.83662289817348	0.353357	2.70641641924354	0.308901	2.29613722640901	0.258993	2.11137972684993	0.287762	4.34937614266895	0.323105	4.90787860591796	0.28547	4.07734457006295	0.256458	4.11365648106724	0.359866	8.63417190195101	0.376147	8.57084081960965
Ccdc141	chr2	-	0.351562	0.592568036641346	0.320988	0.669934766927355	0.316547	0.518936837060995	0.358911	0.573538133836941	0.30212	0.689276280140697	0.291032	0.675953220405823	0.399297	1.29506665857998	0.36194	1.37649516245978	0.470302	1.32210396801172	0.475233	1.44786534050643
Ccdc3	chr2	+	0.429104	1.28279615641485	0.441315	1.35301207202341	0.556416	6.68232268772892	0.576681	6.73354803598664	0.639839	5.88912532781912	0.620441	5.92507626829666	0.747601	5.9536021467224	0.743161	5.78652345793746	0.61165	2.02913801494538	0.635897	2.23992291113761
Ccdc32	chr2	-	0.511111	3.29000743251501	0.509202	3.54544971277679	0.501299	4.17768566025118	0.533493	4.53886628791562	0.540206	4.14411008218027	0.484	4.30286368739648	0.517241	4.12966340565396	0.396624	3.84535733170508	0.4039	3.70748559355291	0.421622	3.58927535813414
Ccdc34	chr2	+	0.477639	4.5799316640809	0.480687	4.41621948578547	0.484155	3.96797464931053	0.523654	4.24909145570882	0.472097	3.52362988483322	0.452454	3.392122433357	0.458228	3.18216943787241	0.442724	3.07224347662273	0.485488	3.32737605201456	0.518727	3.76629811230232
Ccdc73	chr2	+	0.480769	1.10420382755363	0.425	1.02447936968171	0.407143	1.46852561082902	0.416961	1.7651499002968	0.44012	2.10619894885583	0.5	2.32737234146549	0.419512	2.21197178630874	0.546099	2.26073424380581	0.54698	2.096165148274	0.529412	2.4108447365295
Ccm2l	chr2	+	NA	0.0901422892257823	NA	0.0661390844780867	0.478261	0.289005828402645	NA	0.305608820698349	0.385892	1.14126459029765	0.578125	0.925046657606698	0.391892	1.21286569871606	0.519481	1.3668984218379	NA	0.384567517681347	0.525	0.386395110427802
Ccndbp1	chr2	+	0.55254	6.80859191643706	0.550028	6.67188299177875	0.545658	6.50235652134785	0.540957	6.52681808101979	0.572783	5.56848424494903	0.540984	5.53341577464904	0.546541	5.67821043021891	0.559001	5.93016945397723	0.551033	6.32558235241175	0.510158	6.27159908527201
Cd40	chr2	+	NA	0.218410358358988	NA	0.226509709321594	NA	0.196674308443643	NA	0.172045444613113	0.484848	0.248409674575662	0.615385	0.232833556923489	NA	0.131865384019584	NA	0.109544011220351	0.2	0.227808533635985	0.631579	0.369845002845202
Cd44	chr2	-	0.5	0.219570743970104	NA	0.207833408397929	NA	0.0950573140721564	NA	0.0993597124865677	NA	0.100540424951877	NA	0.117035285549203	NA	0.127831468683684	NA	0.107623140464408	0.545455	0.646877805856741	0.53012	0.727983015081304
Cd59a	chr2	+	0.769874	1.8227948412659	0.743682	1.81220473426438	0.892617	1.09544657607456	0.822335	1.34935923179909	0.701923	0.995056685788662	0.793722	1.17895290833152	0.545455	0.469434317907376	0.727273	0.543150452501329	0.607143	2.12719724446761	0.644518	2.19724695363989
Cd59b	chr2	+	0.641026	2.02666611693944	0.598361	1.89340544639584	0.822222	1.39721967356251	0.8	1.45777399707928	0.652482	1.85107146854576	0.847826	2.17418781436913	0.761905	1.20920557145958	0.868852	1.22629541287946	0.572052	3.10994618181588	0.62766	3.3326145602171
Cd82	chr2	-	0.307692	1.02632577948954	0.274262	1.18995158558598	0.375	1.21319577985544	0.299145	1.0123607843803	0.34058	1.01653595412887	0.3	1.08268249653163	0.348837	0.640551696654199	0.330769	0.823984385472869	0.29661	1.0418930383849	0.322176	0.987271693850035
Cdan1	chr2	-	0.540419	4.39524870007103	0.518229	4.24280269121289	0.457746	3.13340867613142	0.505529	3.07519513609742	0.47178	2.89398399351724	0.469613	3.08100981254115	0.489362	2.29631277340644	0.446154	2.52141398207307	0.468019	3.96183751558806	0.461433	3.67791201184294
Cdc123	chr2	-	0.444416	25.2184312133986	0.451399	24.972736722368	0.424255	23.7816040800329	0.444949	24.2947562426445	0.433296	23.3437535121031	0.461461	23.4814289406008	0.458791	24.692985826511	0.444288	23.3552990926229	0.519613	18.4907530313633	0.48762	18.8439962048083
Cdc25b	chr2	+	0.411978	6.03209463579726	0.429287	6.024407556233	0.422466	6.66223668656037	0.458693	6.48807392956916	0.5	8.24401905704239	0.475162	8.18710571019715	0.506589	6.40242417401523	0.497674	6.54629379986304	0.53514	10.1071790334011	0.511905	9.24330832411167
Cdca7	chr2	+	0.515584	58.1636123478702	0.514899	59.2714082472017	0.513459	72.7307366323842	0.517076	72.7820708673601	0.528291	83.7010108495111	0.507174	80.6983026490288	0.504329	80.0421057216013	0.513009	78.8172706246661	0.464145	82.083475965202	0.472009	76.504967088926
Cdh4	chr2	+	0.404255	3.23115984194424	0.404615	3.25680010105677	0.402164	3.12069036006299	0.463497	2.96705213917115	0.474591	2.46804404366526	0.467076	2.29343887655925	0.394881	1.78153900354528	0.395349	1.90930599365436	0.514851	0.570238107988913	0.575221	0.569417243256535
Cdk5rap1	chr2	-	0.480349	6.08819138935335	0.501724	6.0587635634502	0.461769	7.48021007655764	0.533046	7.10889926617263	0.493116	7.36272792337294	0.462069	7.2093197588079	0.527523	6.53483821096818	0.546414	6.79561467477533	0.464419	5.94607995558474	0.458545	5.78356222937831
Cdk9	chr2	-	0.427368	22.8924564012105	0.479374	23.8252052872724	0.500914	21.5457110106242	0.49711	20.8526792126351	0.413242	24.2924843366043	0.468045	23.154273024233	0.4821	21.5855977546566	0.458333	22.1785317754539	0.531579	21.3591118391821	0.547703	19.9686076879575
Cds2	chr2	+	0.344401	32.0287062196404	0.342328	31.485062758133	0.339739	26.0678594415866	0.34066	25.2471321510023	0.325852	29.2108734292502	0.33066	28.211517137193	0.351442	29.6691787817985	0.348471	29.6905741614388	0.436898	27.4623122694942	0.444541	25.5570251251765
Celf1	chr2	+	0.473357	56.312952460323	0.505502	52.1951652254033	0.516015	53.4824997602713	0.488595	52.6316695534978	0.502382	55.7874167748067	0.473645	55.7792216062216	0.513478	49.9503574393942	0.487247	50.7958867315954	0.516022	44.4414756223568	0.502809	43.691586835229
Celf2	chr2	-	0.706499	0.795738237165879	0.696746	0.709187641108238	0.682186	0.545466514238613	0.625	0.548151787346554	0.722222	0.433003298751873	0.667436	0.443856583621594	0.670543	0.431315697766421	0.643564	0.442265420189637	0.646512	0.627406233220039	0.68207	0.630849395119809
Cenpb	chr2	-	0.572201	17.2901737310298	0.560513	17.2560503336428	0.58475	19.8136484918104	0.570171	18.2015647520257	0.60491	19.3382384348838	0.587258	18.6964964983926	0.594549	16.5460560038327	0.588672	17.493941755398	0.578151	7.48607166473098	0.586898	7.40921638602967
Cep152	chr2	-	0.44425	5.34961645434686	0.438037	5.03593771305246	0.457043	4.88441395164515	0.46832	4.82241167663816	0.443451	4.34342192855055	0.411287	5.04122864291229	0.436629	5.18089772834988	0.437765	5.05136220218112	0.381321	5.52951210859928	0.453228	5.58229392904815
Cep250	chr2	+	0.481986	7.08788953016538	0.500734	6.71500169682264	0.467035	5.9089319919168	0.463252	5.25972331672345	0.438092	6.1407490090438	0.461471	6.85220800588792	0.465128	6.04011597097397	0.463128	6.23735936809729	0.503157	6.67176806947898	0.472706	6.29783050190873
Cercam	chr2	+	0.422819	4.65444977005028	0.533333	4.65510935609355	0.526316	3.12629597212863	0.492537	2.70510436861756	0.447368	3.46240312644435	0.5	3.45914637368022	0.56338	3.23370049423609	0.523077	3.16829551770669	0.553991	6.19667186795076	0.55814	6.03431137596662
Cers6	chr2	+	0.698322	4.22245055309856	0.694373	4.0635710190044	0.586162	4.23986596057851	0.636805	4.21165928555729	0.633402	4.0027619912025	0.609117	4.26042996296704	0.618421	3.78284270121803	0.614913	3.78935204658311	0.558582	4.84683792474971	0.59635	4.91473913940162
Cfap77	chr2	-	0.714286	0.372094590605587	0.785714	0.336015709908253	0.714286	0.30438047507227	0.8125	0.346855825584743	0.833333	0.272189865053382	NA	0.247977202902252	NA	0.336214372664262	NA	0.310233011820828	0.692308	0.560273009473481	0.5	0.412766666185426
Chac1	chr2	+	0.518156	8.59634440488454	0.475027	8.51303658068243	0.522569	5.47708513948003	0.470803	4.92771480622199	0.460337	12.256727146032	0.469672	13.6513192248901	0.464945	3.43934588069894	0.453608	2.81793406461077	0.486175	4.49039821887115	0.44213	4.26468182198243
Chchd5	chr2	+	0.395018	13.0750648594809	0.41555	12.9266279125896	0.455729	14.418777766944	0.450495	13.6301180112737	0.419118	17.7896438617132	0.448276	16.7135486048751	0.435567	18.6597153905026	0.397333	18.7663128424426	0.401623	20.1153738753923	0.461812	20.5052994264258
Chd6	chr2	-	0.441372	5.11622661079672	0.433333	4.74943345643582	0.457961	4.70675108199534	0.456969	4.55078434688765	0.476841	4.9067460337893	0.44337	4.99061101815305	0.430357	4.63412240612939	0.458505	4.9511193368223	0.462977	6.47724814977697	0.470714	6.6019807118472
Chmp4b	chr2	+	0.526316	49.2848217497001	0.512762	49.5394317474778	0.540619	49.2661865604887	0.496577	51.199802590016	0.505348	52.0674183725113	0.514831	52.4504203456847	0.523709	47.2905381611269	0.521036	45.3143244024903	0.544885	42.3419757171349	0.531016	42.1080256617809
Chn1	chr2	-	0.625749	5.08971612322073	0.63949	4.89027138892255	0.587121	5.08677881006902	0.590096	4.95950148253583	0.480129	4.79367942911797	0.562036	4.71604837085789	0.500904	4.9499194573974	0.498339	4.85778516294337	0.452618	5.95979314581266	0.418067	5.8589584435203
Chp1	chr2	+	0.534268	19.8032908082765	0.522914	19.172069839376	0.440334	19.61226198648	0.508497	18.3649789699888	0.491018	17.6644861529137	0.486079	17.3005735665277	0.466071	17.2094797634224	0.52834	16.7122112661091	0.533123	16.9155206423539	0.538003	16.7255513007528
Chrm4	chr2	+	0.36	1.75429146315142	0.566667	1.75184486783031	0.405405	1.86075748488625	0.525	1.7056648421601	0.472727	1.86187173332926	0.666667	2.09695722204217	NA	1.09164391867879	0.5	1.37795162750418	NA	0.60500262422157	NA	0.572290015435833
Chrna4	chr2	-	NA	0.148129366899784	NA	0.126799503256674	NA	0.169299688451189	NA	0.168819328299965	0.5	0.350078708893215	NA	0.25711216557388	NA	0.249135324868541	0.333333	0.3174400710361	NA	0.338823154245951	NA	0.199261244493787
Chst1	chr2	+	NA	0.479976457457783	NA	0.57574035070847	0.3	0.355701631726246	NA	0.353564588843855	NA	0.369003206262955	0.1	0.337637616936686	0.363636	1.02347852016245	0.305556	1.04414245023279	0.380952	1.50347667064017	0.25641	1.34421040725824
Chst14	chr2	+	0.5	1.14937580231719	0.375	1.00193775318097	0.0714286	1.02317691660657	0.25	0.823232986262977	0.291667	0.715014825192567	0.365385	0.822121549717562	0.583333	0.690738462360957	0.3	0.624820171175984	0.681818	1.38730864908224	0.193548	1.37443485867077
Ciao1	chr2	-	0.498851	15.1538496863208	0.53293	15.0038202381777	0.52378	16.3716751160548	0.505507	16.2896518560579	0.542925	16.4116846715568	0.51416	15.4525400015589	0.534808	15.7996490583777	0.532619	15.2618727454278	0.50328	12.4373740914614	0.539286	11.3382929480262
Cir1	chr2	-	0.6	6.03927860070795	0.454545	6.27995172933943	0.384615	6.23107042933637	0.533333	7.06864097024309	0.615385	6.44537540863876	0.5	6.5495340057453	0.75	6.05770658751694	0.130435	6.36178996700008	0.655172	5.75700502820526	0.4375	6.5777248823394
Ciz1	chr2	+	0.405405	0.506153863126575	0.470588	0.498148193314059	0.595745	0.419224409211578	0.727273	0.372411158537176	0.609756	0.471246772479934	0.492537	0.562473627596508	0.394737	0.512683934141692	0.425	0.473065680507818	0.538462	1.79570601069948	0.504545	1.59953862054869
Ckap2l	chr2	-	0.49675	23.95105952746	0.505733	22.8327393836683	0.490125	25.6698843437423	0.503115	25.6867761397505	0.514744	22.7993348579171	0.525715	22.7584101593765	0.499294	21.7316062477286	0.529736	21.852060433523	0.497681	23.4542179273655	0.528835	24.6527495806416
Ckap5	chr2	+	0.493522	31.1746037181674	0.485276	31.6604941187824	0.474351	32.6574238744206	0.498268	32.7599388203788	0.494953	27.1717879870087	0.485151	27.8159818128043	0.483495	25.5678028519874	0.485052	24.8709256891508	0.495948	28.5112761734854	0.489699	34.3691285726258
Ckmt1	chr2	+	0.584711	12.554898555305	0.628131	12.3930922408683	0.568027	6.61140071599284	0.618893	6.06906320741271	0.522088	5.51165686505729	0.481356	5.56826053327825	0.541667	5.61031283952071	0.510753	5.45609051718864	0.464435	5.83551209059868	0.476027	5.82509479997187
Clp1	chr2	-	0.503715	21.994217352203	0.500625	20.8528711521572	0.509225	22.4714750499462	0.521073	22.4719100637063	0.49547	21.1208302251427	0.520697	20.7526849737216	0.497071	21.1131644616521	0.508007	20.5264650545763	0.486486	18.9363330726836	0.538878	18.6417720254757
Cnbd2	chr2	+	NA	0.26369433121545	NA	0.233616147085249	NA	0.132840084589416	0.5	0.215350054859509	NA	0.311598479580416	NA	0.311905329456068	NA	0.256383059645192	NA	0.271070659464998	0.671233	0.912416950682182	0.486957	0.883189364225799
Cntrl	chr2	+	0.500915	6.43699041007864	0.458658	6.47613091594019	0.469725	8.30504246208567	0.503479	8.38647552440832	0.458766	8.66091300222922	0.459179	9.60854495616756	0.427543	8.0454173853114	0.425935	7.94732940895847	0.440685	7.99073507212009	0.421366	8.82095579833291
Cobll1	chr2	-	0.620629	0.808156944398476	0.718586	0.802986155849905	0.709677	0.799923592805607	0.65674	0.887781770546489	0.645299	0.723143660511483	0.640103	0.753206229577711	0.651772	0.974889044555717	0.65391	0.963648741584908	0.655271	1.36582497250692	0.633594	1.4423190223595
Col20a1	chr2	+	NA	0.310478163844204	NA	0.230724198403229	0.736842	0.992353924776518	0.788321	1.02585078779491	0.873563	0.765209606203827	0.813187	0.882616688793992	NA	0.367251676307344	1	0.408514159138262	0.555556	0.665531744388741	0.5	0.38465937871003
Col5a1	chr2	+	0.50856	4.03971159968342	0.555099	3.85695551263776	0.54375	4.5853838972489	0.599381	4.05607472716575	0.551982	3.74552983577932	0.576974	3.9063565454126	0.563131	3.35546480058879	0.546243	3.32196583352643	0.489697	2.77221608819548	0.513187	2.57504506894944
Col9a3	chr2	+	NA	0.257429078837516	0.4	0.276510202668683	0.727273	0.284190036921875	0.4	0.24916192629741	0.757576	0.453440742430921	0.666667	0.472334464598917	0.5	0.532878719182177	0.545455	0.559004513383875	0.463343	2.42362198413183	0.478754	2.26412197571707
Commd3	chr2	+	0.565432	8.56050260098809	0.509225	9.00310590519269	0.569733	5.97113329583834	0.540698	6.26065690523374	0.563218	4.10285110025134	0.594937	4.39409217863746	0.548023	4.26139845560798	0.532967	3.85043993898824	0.578249	6.18115342042681	0.603321	6.79590007293759
Commd7	chr2	-	0.577794	5.33247518158963	0.59257	5.26576181870826	0.590636	5.03044759704365	0.579789	5.0593000078289	0.537943	4.73290258415488	0.559275	4.46070042213208	0.532417	4.25468457610539	0.532895	4.12484336561629	0.498465	2.82758599496236	0.519953	2.64475947525125
Commd9	chr2	+	0.485782	10.254629907992	0.471572	11.3974067761972	0.422907	8.98213530949844	0.466165	9.22243923098031	0.453333	8.5462964808556	0.499065	8.06003305563063	0.458333	11.2543706910797	0.501312	11.1474738404832	0.54232	7.39258824540402	0.522099	6.8711545994543
Cops2	chr2	-	0.503691	76.9705170807469	0.507674	77.6333153617626	0.493995	82.7268167723047	0.509534	89.3086816891976	0.513683	69.064932592119	0.525	70.1066279195211	0.501765	79.3391440584643	0.49187	74.8144376277796	0.518904	43.3269842130612	0.493393	55.7790988115649
Coq4	chr2	+	0.657343	5.00186655135133	0.565401	5.2348635576122	0.615385	5.56370151635483	0.504348	5.13898008098452	0.488281	5.5150605710527	0.494737	5.3303060895688	0.575342	5.33738900311924	0.516393	5.15917163994594	0.452703	3.39212636396074	0.447761	3.60562192551982
Cox4i2	chr2	+	NA	0.118005342730126	NA	0.139864407169933	NA	0.212523062994622	NA	0.237331292938869	NA	0.47410564233898	0.823529	0.490289951931102	NA	0.407118834273661	NA	0.559574264976316	0.411765	0.932840340646203	0.318182	0.851587463143095
Cpne1	chr2	-	0.587744	0.0412639050682668	0.580897	0.0271708583807675	0.585333	0.0142912882217203	0.566679	0.00829895978858791	0.608584	0.00975202615965012	0.584978	0.0203025488952587	0.608068	0.0142360613005389	0.597949	0.026340322281659	0.603065	0.00906094456067362	0.587559	0.0156727177830219
Cpxm1	chr2	-	0.51332	17.0465640036206	0.526514	17.0949220543418	0.556406	14.6831280784862	0.546241	13.6622933606766	0.543706	12.207990943459	0.562481	12.6335819876624	0.513958	11.918236472525	0.521975	12.1058908165347	0.509098	12.6722177951673	0.521017	12.518306221103
Crat	chr2	-	0.379493	2.83612890158192	0.409212	2.86601471879347	0.421446	2.11355527236523	0.432873	1.99929149757679	0.400697	2.58183535112071	0.426392	2.65309833676749	0.405286	2.17921916769113	0.381599	2.39849041210253	0.370933	3.73157938185659	0.41276	3.54189798926434
Crb2	chr2	+	0.419118	0.902393797348021	0.441379	0.745943504906308	0.432432	1.33860680402043	0.405018	1.14849731563358	0.421569	0.564333359739132	0.44898	0.479664473096682	0.2	0.397539567584869	0.545455	0.460825865274613	0.461538	0.660507866470623	0.413333	0.643304461321719
Creb3l1	chr2	-	NA	0.547759977369907	NA	0.446930871248609	0.733333	1.0442325316348	0.407407	1.19265584966375	0.592965	4.39017260637772	0.671875	4.47225885141999	0.586667	4.47999633698344	0.541401	4.39133258991255	0.526829	8.48758483673115	0.509524	7.80633607356806
Crls1	chr2	+	0.454342	23.6564626646426	0.462079	24.8917740879927	0.473435	22.522136704675	0.508125	24.462525947626	0.48167	18.1129412447281	0.488251	18.776352618408	0.515483	17.4503803503438	0.502924	17.2933794735321	0.470233	13.5275622786141	0.45552	14.0798893875856
Crnkl1	chr2	-	0.491647	22.3560364570576	0.502029	22.9053234186273	0.493597	24.3836234571942	0.490515	25.6945740564938	0.496855	23.1281687022233	0.506566	22.4976736741282	0.493497	22.6336042533177	0.518851	21.4419111812065	0.492505	14.2004062878229	0.515639	15.1907395802322
Cry2	chr2	-	0.433486	2.51352624797264	0.547431	2.3271096443871	0.521262	3.21035021278756	0.551618	2.87232951123382	0.501829	4.85249596072812	0.529861	5.36344869834184	0.555749	3.38068387939069	0.530081	3.47506788241073	0.506002	5.24471222698406	0.508606	4.78922917438326
Cse1l	chr2	+	0.529516	101.858505854742	0.510693	101.731823768679	0.523065	95.1296621884886	0.530782	102.102163659508	0.525688	88.1152317801418	0.521319	86.4345162373959	0.527411	94.0465662218732	0.518801	90.5316370152449	0.536566	69.118652734769	0.531037	75.8970891333342
Csnk2a1	chr2	+	0.586685	42.6135842081756	0.5662	42.8459872123673	0.562398	42.3099871616327	0.596294	41.9374784214072	0.549538	36.79283711373	0.568327	36.8188603285613	0.569567	37.0001358181535	0.563513	37.7776779190616	0.571175	39.0883413626353	0.568428	38.2214029292227
Csrnp3	chr2	+	0.216667	0.500017666563891	0.321888	0.468552818716279	0.302083	0.449037929419197	0.263158	0.526566621560023	0.201354	0.750888820180789	0.277159	0.76566177702204	0.155452	0.964821473429282	0.20852	0.947230042253197	0.371933	1.36831819194081	0.411301	1.43533771520093
Csrp2bp	chr2	+	0.499632	10.6530438579281	0.478939	11.1800247269183	0.511432	10.6149715705986	0.517495	9.73226320223904	0.514918	10.8150546017577	0.534164	10.7793827238178	0.481044	12.2001878952003	0.533825	12.0545672522506	0.514983	12.0337455358308	0.521231	11.3168423664672
Cst3	chr2	-	0.398377	90.5521050418241	0.390572	92.5407436646534	0.36179	81.6989893154485	0.374214	76.4514706552152	0.401629	63.6545752104892	0.403861	61.8777553576903	0.442831	47.1331700646303	0.445348	45.8412975508013	0.485119	44.9020904990985	0.484812	46.3473544254384
Cstf1	chr2	+	0.519624	26.5333082295455	0.521019	26.8892693438351	0.525644	24.6319977912366	0.541379	23.8147864305213	0.561693	22.042044262696	0.545551	21.8081229844596	0.531868	22.939171134328	0.523876	23.5805420765731	0.544407	25.2554926802082	0.542541	24.3587237489811
Cstf3	chr2	+	0.509151	14.198403907814	0.495862	13.7144147410517	0.518519	13.5592533853592	0.52401	14.2449802596843	0.523112	14.5261911948798	0.55578	14.4611328793016	0.488114	16.4088210871371	0.506573	15.9930157099102	0.501042	8.25228107438811	0.505023	8.76904110935935
Ctcfl	chr2	-	NA	0.207154338051372	NA	0.216977505351594	0.7	0.472519654945887	NA	0.542583944399876	0.782609	0.993949575174778	0.602151	0.98605047545092	0.727273	1.00221849429494	0.611111	1.09126414726904	0.601476	1.34559955744648	0.532934	1.16008235821373
Ctdspl2	chr2	+	0.498603	11.9782672505689	0.509547	11.7614175413039	0.5	8.73664652815803	0.466565	9.1470095364016	0.469586	8.02935092569537	0.473373	8.30861677781668	0.470588	7.69686519407921	0.510823	7.65748926680353	0.483929	8.47418955140747	0.501868	9.58013326764576
Ctnnbl1	chr2	+	0.486715	22.7342709527464	0.476733	23.1019806528271	0.472099	23.9022540451576	0.480263	22.0640951484193	0.504601	24.8156285616014	0.487018	24.0326120701061	0.431447	21.6205536519829	0.475222	21.4296654642254	0.474624	22.5198527638852	0.474576	21.8178050183626
Ctnnd1	chr2	-	0.480119	4.46794013869212	0.458723	4.30505749545036	0.438137	5.09196744342788	0.501139	5.22288384014802	0.520306	5.38370137651775	0.465479	5.44956923710984	0.476429	4.92676645637645	0.491787	5.2785249055958	0.472913	6.25296126646272	0.4852	6.14458047920174
Ctsa	chr2	+	0.561741	14.6762940250452	0.546228	14.8535176422439	0.543062	10.4614672790056	0.560696	9.6384189389409	0.548413	9.06313961904036	0.547584	9.09105989074691	0.545508	9.0255352985629	0.598847	9.3591454696556	0.509752	14.5537455240235	0.516562	14.3121574628347
Ctsz	chr2	-	0.546174	13.508349739718	0.599119	13.0277402512844	0.37299	20.4988267846034	0.446309	17.9359871832835	0.526763	31.202836006439	0.530091	30.6493627659283	0.547899	23.2314268430866	0.515315	22.4203094039008	0.490079	34.8390824135364	0.50082	34.4442904264058
Cubn	chr2	-	NA	0.0363194660472812	0.666667	0.0442771286976526	0.575	0.0784919461317935	0.73913	0.0943328987766929	0.461538	0.0927017094006433	0.295455	0.0932633377102076	0.458333	0.253468615240054	0.355556	0.230516179657159	0.545455	0.232420659957901	0.825	0.235692944709027
Cutal	chr2	+	NA	0.0444433613614212	NA	0.0150502735012846	NA	0.0580515523284085	NA	0.0612919488196079	NA	0.0585191483736236	NA	0.0416512303113164	NA	0.0591414742455715	NA	0.062529554205591	0.545455	0.501896892277214	0.766667	0.540170502074624
Cwc22	chr2	-	0.535626	14.2303857101258	0.528109	14.793097375095	0.521869	13.9755085707765	0.530196	14.1272536382386	0.513687	12.6454907032034	0.535949	12.5068912572535	0.527691	13.6586280191807	0.504565	13.8171168313704	0.550217	8.27688286698903	0.523233	9.67780597531594
Cyct	chr2	-	0.805556	16.7047522418233	0.823333	18.2473345515707	0.802632	15.7142772446471	0.813596	16.8267765914374	0.792867	21.3722650925824	0.796974	21.7000875052691	0.808756	20.1791713373969	0.795673	20.7914533296227	0.872727	38.7594238456452	0.891179	39.6321757254494
Cyp24a1	chr2	-	NA	0.0261202837279043	NA	0.0206391672003571	NA	0.151980624305748	NA	0.14358987663425	0.0952381	0.203711882408837	0	0.188490536812779	NA	0.270345203433408	NA	0.29536041799571	NA	0.114712576221786	NA	0.105823129660045
Cysrt1	chr2	-	NA	0.0349579737110298	NA	0.0368297920968779	NA	0.0581150400137984	NA	0.0656200206441504	NA	0.0991407110561123	NA	0.107021740199919	NA	0.0964841026789909	NA	0.051005728259264	NA	0.317285210822966	0.9	0.318662882923669
D2Wsu81e	chr2	-	0.560878	17.7223377112707	0.53805	18.2427381830559	0.56051	19.4687636567155	0.578462	19.6129739443554	0.56881	18.7308697289716	0.55342	18.7398267075646	0.548	21.9344266450808	0.552054	21.6528212808528	0.560578	31.8968036359739	0.553978	29.5845961771692
D330023K18Rik	chr2	-	NA	0.483925833037394	0.25	0.451010144212768	0.730769	0.536327217421176	0.285714	0.379324698999812	0.305556	0.607028493035723	0.727273	0.545391013909116	NA	0.500863731581191	0.5625	0.706076094157466	0.25	0.544938312449373	0.318182	0.508993155670712
D430041D05Rik	chr2	-	NA	0.122216540059695	NA	0.135198632744753	NA	0.0893974129289288	NA	0.0818025113827778	0.733333	0.108140993890618	NA	0.101343531663667	NA	0.0647650528360648	NA	0.0813144125362186	NA	0.034351294038194	NA	0.0200533862668828
D630003M21Rik	chr2	-	NA	0.151822443298294	NA	0.115165258986319	NA	0.166579748315413	NA	0.136794086922759	NA	0.193755602034624	0.6	0.205173927871515	NA	0.229419120520749	NA	0.202688809447203	NA	0.178691507839737	NA	0.124555731080078
Dab2ip	chr2	+	0.500943	13.9400805001759	0.478929	12.9997477947781	0.496368	14.4758849959305	0.479727	12.5110224633579	0.451783	14.7339774136837	0.452174	14.6952132246301	0.432498	11.5251419704838	0.445373	11.9765912801555	0.466864	12.2815677350645	0.499794	11.6799464917337
Dbndd2	chr2	+	0.265306	0.0600288437462127	0.5	0.0753336656527047	0.388889	0.0645722666819982	0.533333	0.0511324836188185	NA	0.0450639595709601	0.217391	0.0463297576623027	0.851852	0.0219282051543161	NA	0.0502329141947297	0.463415	0.105451585219754	0.367188	0.0777880774813669
Dcaf17	chr2	+	0.399667	8.39068609811577	0.417105	8.30713500529813	0.403999	8.84515926761104	0.399854	9.13661421438755	0.399037	8.38954424069073	0.428833	8.57658212509735	0.413476	8.96572325390221	0.419493	9.14382748974988	0.418611	9.28141645673791	0.416702	9.57337262848238
Dclre1c	chr2	+	0.65508	1.40074554315278	0.606897	1.43543679824553	0.594937	1.6137279010272	0.59471	1.63676730325045	0.598863	1.98743461528822	0.638651	2.1510611575498	0.625	2.12128315915746	0.536545	2.3229068622325	0.559846	2.52349607886321	0.570268	2.63106675071745
Ddb2	chr2	-	0.504545	4.70718826567269	0.559271	4.68173155787048	0.615063	3.90796738981677	0.54661	4.18327631606459	0.511182	4.42576067758594	0.535928	4.49268346880911	0.497653	4.37361097386884	0.488372	4.46919983549489	0.406452	7.07494845101211	0.456825	6.79863326607981
Ddrgk1	chr2	-	0.536585	12.2630804868553	0.543046	12.8864067071788	0.521912	11.5098825969747	0.438406	11.7439055180656	0.481203	11.3097239897805	0.458194	11.0793691647944	0.4375	9.29793778359968	0.478992	9.76549211873625	0.442857	10.8038256527859	0.496	10.0724298082795
Ddx27	chr2	+	0.512724	41.7645822066311	0.515369	41.9543667446778	0.501401	41.7674252392298	0.516179	40.8354873330962	0.51645	44.846576094267	0.52297	44.6257550424445	0.509789	40.0296107469514	0.514115	41.1152018805035	0.545014	34.5782172460952	0.530897	33.0846392600463
Ddx31	chr2	+	0.49481	7.93759008814959	0.443038	7.9698878059104	0.523889	6.37911505527805	0.512458	6.3750202851602	0.492703	6.7657316792415	0.473102	6.38965819849518	0.493088	7.40295027073951	0.533883	7.51511818787704	0.488183	8.08125321912259	0.458672	8.03843302787289
Dennd1a	chr2	-	0.472973	1.12417316007778	0.425926	1.00639255115089	0.583333	0.868102247651371	0.535211	0.834491307891884	0.575	1.16368972546284	0.381356	1.24769186624495	0.543478	0.743273119919302	0.5	0.805748565373022	0.528	1.39904885388047	0.540741	1.24679598923716
Depdc7	chr2	-	0.580537	9.19086713729919	0.521926	9.31880718806201	0.474855	9.24369249685124	0.522673	9.67801382715945	0.462636	9.420614298315	0.46483	9.99729085040229	0.443721	11.096707539148	0.500579	10.5510799898147	0.496304	9.60542692153306	0.452888	10.346154717443
Dgkz	chr2	-	0.590909	7.93687247578602	0.57	8.12878153750333	0.598214	9.32570286039604	0.639175	8.31385776706644	0.722973	10.6586278598559	0.632479	10.7491987240192	0.742268	8.7263292411601	0.505376	9.36418801996215	0.611111	10.9877450281772	0.692708	10.5298233434777
Dhtkd1	chr2	-	0.369565	5.19048354022081	0.380397	4.8883072864285	0.417921	5.0670264492056	0.396725	5.59308873259212	0.388268	4.65688429747914	0.398732	5.2352439610349	0.404352	3.79672866311432	0.392857	3.89372719968143	0.540609	6.68698423953093	0.533488	6.04907099485373
Dhx35	chr2	+	0.549147	8.04279070346238	0.542709	7.61283200643888	0.563674	7.49757081508771	0.533094	7.34804614149284	0.530597	7.88294895903401	0.552077	8.16511706082325	0.540574	6.93743093024655	0.510052	7.0494701324362	0.576483	9.01535825339067	0.557448	8.07019058627966
Dido1	chr2	-	0.505971	19.3530358302077	0.514159	18.7355825995613	0.497516	25.4671355385033	0.506039	23.8037894681148	0.487746	18.1232974745447	0.49065	17.7639038601166	0.506469	21.188817451956	0.500475	21.9120045150828	0.466612	17.3392106269258	0.461875	17.5190083794253
Dlgap4	chr2	+	0.575563	4.00700585741088	0.581395	4.11819482769213	0.483146	3.87181454215702	0.522193	3.47729426636728	0.489535	5.5285033678074	0.4673	5.6339328941949	0.433884	4.95392949990506	0.36971	4.99892047967073	0.492754	5.48142686428648	0.496241	4.99275804733795
Dll4	chr2	+	NA	0.0241402414515418	NA	0.00317910328977463	NA	0.0100328405008245	NA	0.00647341844360777	NA	0.11695532567259	NA	0.108216427330915	0.230769	0.632957755632944	0.363636	0.510719350716462	NA	0.310982657310153	NA	0.305628846694704
Dnajc1	chr2	-	0.516605	1.31023641633435	0.561546	1.26022153813253	0.541345	1.19633550027547	0.606211	1.19102787448446	0.565306	0.993087677931613	0.545908	1.03843513257239	0.498555	1.09864429595443	0.557836	1.03785559288854	0.563207	1.2758488092974	0.617816	1.35097970856983
Dnajc10	chr2	+	0.497916	19.793753349518	0.5	20.6203043323856	0.493629	21.4908736632961	0.480782	21.736435135675	0.505321	17.8699282531354	0.506646	18.1458953564989	0.505361	19.6915830052674	0.515032	19.6775186602454	0.498165	15.4596668770287	0.512328	16.6852242115968
Dnajc17	chr2	-	0.528545	10.8059693660883	0.525355	11.272225282984	0.47376	16.5065078228794	0.511297	15.8611817483598	0.480388	15.7596843362567	0.494135	15.7869339930225	0.485315	14.9490425411284	0.501239	15.3775641516815	0.494259	13.9872166333794	0.47547	13.1409188341229
Dnajc24	chr2	-	0.534271	9.82636551520847	0.55218	10.0185643366525	0.496571	9.47577967383495	0.505295	9.42598762576491	0.57989	9.00558299735781	0.555276	8.72629784500803	0.551923	8.72911551675293	0.508368	8.90709418599094	0.553571	7.07972391528821	0.607211	7.20644691043231
Dnajc5	chr2	+	0.519239	13.5209377796813	0.51838	12.9732982388484	0.523987	11.7334625193399	0.514828	11.3632206897996	0.518704	12.5368274710536	0.538622	12.4145526475255	0.514595	12.141673685664	0.514533	12.539666228411	0.532498	12.768748754695	0.547954	12.461955783927
Dnlz	chr2	-	0.609442	4.54949175932021	0.614907	4.87148518922009	0.611276	4.52819663344825	0.630662	4.65618603274388	0.616393	3.71168520001886	0.657343	3.63308712701989	0.646739	3.71857540451934	0.576923	3.2569501378172	0.530726	2.27342807095605	0.590643	2.41027964172975
Dnmt3b	chr2	+	0.476826	52.1487934859537	0.486782	49.911779691853	0.50469	91.9160038272292	0.495477	87.1452123357081	0.487615	157.2765314773	0.489515	153.009753291682	0.485038	209.958789403041	0.482295	212.876067994505	0.500536	273.10963056921	0.492528	267.899744905844
Dnttip1	chr2	+	0.504098	7.9973366343164	0.46049	8.47749091719098	0.407975	7.59452929831591	0.45098	8.04943043057132	0.475645	8.01582082747275	0.419023	7.4983304543935	0.418803	7.52889733369496	0.311881	7.05709439330785	0.433071	7.43494624558812	0.391791	6.9127887255661
Dok5	chr2	+	0	6.29388525935346	0.0018018	6.80866825361102	0	5.8873252828458	0.00206612	6.06465575410304	0	4.18268566455578	0	4.22669287865349	0	1.81453417085772	0.0181818	1.66908167898174	NA	0.238681747960716	NA	0.239718118941448
Dolk	chr2	-	0.5725	3.35152373118341	0.52	3.73663097431561	0.59115	3.8450575111791	0.592892	3.84581974602195	0.572695	3.23793687962889	0.615142	3.35358523354595	0.538667	3.27061160085265	0.552279	3.16779754085488	0.495146	1.52688399934246	0.676329	1.53874827615827
Dolpp1	chr2	+	0.50885	14.352340496628	0.45045	14.3670649468913	0.405896	15.770992202198	0.468896	14.4808548495419	0.453792	15.89586221416	0.457179	15.5352003327628	0.471871	14.6363817221242	0.438166	14.955540564903	0.433333	11.894673461826	0.468085	11.8092377220808
Dph6	chr2	-	0.565932	5.99876689335604	0.564741	6.0328487279197	0.572847	5.85932513934178	0.582723	6.38118599564939	0.55788	4.53201453723553	0.546148	4.58183664571303	0.574675	3.95002555641652	0.522439	3.99085220714673	0.604341	3.94023580294972	0.667535	4.12454112843183
Dph7	chr2	+	0.61848	6.29095712956206	0.626106	6.59155948216733	0.604923	6.04072872227993	0.621282	5.55120402971466	0.573086	5.59858564390692	0.609548	5.74772360739651	0.645872	5.45986810429501	0.596616	5.61488957208403	0.601978	6.94154173710457	0.607515	7.36734811777014
Dpm1	chr2	-	0.615385	1.65969075704843	0.407407	1.48147826415062	0.666667	1.00628492639729	0.636364	0.937291174830386	0.294118	1.20019523285693	0.285714	1.45398944540537	NA	1.03666622006476	0.5	1.19796034955836	0.5	1.31963117461068	0.6	1.20887982658952
Dpp4	chr2	-	0.244804	2.80333185924832	0.284536	2.63367401176388	0.433447	1.67168493535497	0.308094	1.93755079154701	0.424731	2.16145001992475	0.497278	2.11257426235748	0.476809	3.0994506421802	0.553047	2.9307912444463	0.442197	1.68891379827006	0.496994	1.80905385387154
Dpp7	chr2	-	0.297937	12.6046350081717	0.293326	13.0972844045323	0.295877	9.60082404375392	0.329258	8.99310879268483	0.249135	9.33839939112798	0.297384	9.50896339843425	0.265121	9.80598843979016	0.300297	10.2610242675123	0.337768	10.7407455695075	0.314815	10.7849926415933
Dsn1	chr2	-	0.485104	11.4641099774892	0.525219	11.4097960198754	0.519549	10.6352775746182	0.50116	10.9176923434869	0.502028	10.7653195384966	0.463532	10.6399520780152	0.483949	10.1436679997855	0.508169	10.1331684290386	0.512338	10.9988178330084	0.543478	11.8044139345405
Dstn	chr2	+	0.376752	282.695188092337	0.378675	289.762099282929	0.426201	243.035465291404	0.424131	250.51739142432	0.465031	212.695258885398	0.466489	209.018050856751	0.490271	257.084188828711	0.490935	251.897300616374	0.544957	261.267106568274	0.556333	263.727256559328
Dtd1	chr2	+	0.365333	4.01117863248658	0.336347	3.8096060766932	0.314136	3.35056792531742	0.359043	2.97256183614959	0.421136	4.21685091979318	0.428571	3.97522315914702	0.524254	5.2559335640734	0.501916	5.48495832374085	0.552672	15.8514287221674	0.543649	15.2151106137704
Dtwd1	chr2	+	0.594705	7.7719775578144	0.583448	8.2183634964622	0.603687	8.89346654314863	0.658278	9.08764374787433	0.592105	7.14633172399164	0.626928	6.86088630044594	0.674134	8.00835919662046	0.645598	7.66313839569276	0.655719	11.0412978920437	0.627193	9.88917146673119
Duox1	chr2	+	NA	0.0617920514998456	NA	0.0372003975613044	NA	0.0489165263074184	NA	0.0236715472230654	NA	0.0667588865031982	NA	0.0598403312870253	NA	0.134000609663341	NA	0.135237325828863	0.54386	0.467794415633633	0.351852	0.4917450348262
Duox2	chr2	-	NA	0.00726130017736523	NA	0.00382505259166387	NA	0.00804758219775645	NA	0.00584154486446443	NA	0.0137286840235962	NA	0.0111150175281815	NA	0.0150309062037004	NA	0.0211893233124539	0.9	0.159447435323114	NA	0.156284549406184
Dusp19	chr2	+	0.625	0.937548241026759	0.703704	0.904527138288378	0.533333	1.01610677136425	0.666667	1.02509350431403	0.423077	0.943830393440556	0.509091	1.08059049847579	0.789474	0.975724510965764	0.315789	1.03162153930794	0.488889	1.31029980112158	0.62963	1.34569034951222
Dusp2	chr2	+	0.636364	0.410082803609667	NA	0.360713153500001	0.695652	0.430906241939555	0.638298	0.516638904422492	0.684211	0.548581900917912	0.611111	0.49744004056977	0.631579	0.704724124909454	1	0.65195914016865	0.761062	1.2640718833586	0.75	1.23429499085512
Dut	chr2	+	0.508268	93.2068545486853	0.496741	97.9875721326698	0.505639	88.8602272131315	0.516195	99.995926147655	0.509607	88.547635779032	0.520017	85.1713202178989	0.509763	79.1108588749225	0.521522	75.4236095427503	0.528763	60.1833264001322	0.555456	59.1865251387646
Dync1i2	chr2	+	0.5	14.485421854712	0.504119	14.1922358393412	0.444598	14.0116905592689	0.490035	15.1254940097093	0.483586	14.3508773515485	0.480392	14.2535379496211	0.446768	14.0838532188018	0.502404	13.8419875119632	0.479644	17.6437178346356	0.456476	17.979148435245
Dynlrb1	chr2	+	0.503413	52.6533835686407	0.518917	53.9475238869989	0.500723	52.1159628571708	0.48629	54.1713106003484	0.510336	57.0313736418189	0.485149	53.122664382287	0.500948	50.7922103219735	0.532023	50.5420513093551	0.491689	48.001471835538	0.506284	50.9066675035964
E030042O20Rik	chr2	+	NA	0.108605711365731	NA	0.145886755310163	NA	0.162494050213774	NA	0.174741470531024	NA	0.223303972520103	NA	0.156745225660709	NA	0.202332639990806	NA	0.213923814738399	NA	0.238482113612217	0.454545	0.338252102425984
E130018N17Rik	chr2	-	0.5	1.61018545578076	0.363636	1.24423642551886	NA	0.895551730693916	0.416667	0.790548300655654	0.318182	0.805849629974816	0.470588	0.877676379714388	NA	0.551429864910008	NA	0.492328018759206	NA	0.707145924414822	NA	0.602581476473307
E2f1	chr2	-	0.494585	21.1341308136139	0.506582	20.9624748903209	0.496302	13.2742686778505	0.464481	12.2069050451287	0.48173	15.0642120594699	0.496912	15.3892104733257	0.493881	15.1962461719411	0.503185	15.2656150255475	0.492806	15.3734734680525	0.509546	14.967983808011
E530001K10Rik	chr2	-	NA	0	NA	0.0199120420686372	NA	0.0523665333457668	NA	0.0304092778594843	NA	0.321602794401535	NA	0.314104457009519	NA	1.12152964069339	NA	0.744559228369988	0.844444	2.2576927196561	0.870968	2.39285023875609
Ebf4	chr2	+	NA	0.263409124120501	NA	0.174076535884347	NA	0.139331227474367	NA	0.165672301811715	NA	0.159592239599237	0.818182	0.188511717904679	NA	0.163577227540981	NA	0.178189047580649	0.567568	0.870766292432621	0.623377	0.723977692138849
Echdc3	chr2	-	NA	0.184706562525317	0.4	0.186995210711615	0.181818	0.215902243626681	0.5	0.17645309089414	0.26087	0.225082030222055	0.333333	0.193117441813262	NA	0.143378610684981	NA	0.233705017470985	0.555556	0.344750098718437	0.688406	0.521775030833117
Edem2	chr2	-	0.54	5.12871733284025	0.435252	5.02495877690242	0.561475	5.18560239129765	0.478417	4.83878962509103	0.479452	5.72091716492075	0.522673	5.70154226089608	0.47619	4.69680878410846	0.453125	4.78957486109985	0.511029	8.27445474724058	0.462609	7.54371776627632
Edf1	chr2	+	0.523376	41.751729857392	0.530782	43.3302364195197	0.569047	43.8502320207379	0.52288	46.7850318788491	0.525375	46.0048279812279	0.515402	46.5662399424159	0.529526	37.2938163246093	0.489101	34.575551613562	0.533207	32.9719539510275	0.532716	33.056871753961
Edn3	chr2	+	NA	0.00753612205781175	NA	0	NA	0.00626412215077006	NA	0.00909394888576847	NA	0.0160293150625613	NA	0.0247193418891134	NA	0.0389994701443769	NA	0.0371102946306461	NA	0.182030330044783	0.255814	0.206088808309496
Eef1a2	chr2	-	NA	0.148733541380901	NA	0.141027706781711	NA	0.14835509254962	NA	0.101704734491653	NA	0.295265521411518	NA	0.282960551104393	NA	0.600363532384748	NA	0.447585055442078	0.28125	1.13002529500118	0.428571	0.773933193345085
Egfl7	chr2	+	0.408389	1.48878079980176	0.543413	1.67222786135482	0.523006	1.89221445093796	0.534121	1.88705661154275	0.489726	3.31391876945452	0.476716	3.48649991949807	0.466216	3.53419166532577	0.518519	4.07764518301668	0.502665	5.32566188830618	0.491965	5.26341521995606
Ehd4	chr2	-	0.502869	12.7790136459406	0.522375	12.4598348492658	0.513026	13.3065360752333	0.53607	13.1492237025241	0.477496	13.7577427002771	0.488215	13.4732011090215	0.51551	14.9396254271691	0.526521	14.8897393424882	0.518269	16.4662025682665	0.516306	15.7862188464077
Ehf	chr2	-	0.659259	0.856060757471678	0.589212	0.93337697196737	NA	0.170961329452356	NA	0.13639455510504	NA	0.0374415017991983	NA	0.0328205121488275	NA	0.0345204061772932	NA	0.0334565012747952	NA	0.0244127672973195	NA	0.0401154304732639
Ehmt1	chr2	-	0.500906	12.7406221783304	0.479178	12.2715564882577	0.483199	15.3836821749685	0.486512	14.1100023443986	0.501588	15.8647736299372	0.490601	15.50991075831	0.492186	16.8883587101301	0.491686	17.4630045131022	0.504177	18.1830646385764	0.489963	17.6287727996409
Eid1	chr2	+	0.422274	6.58964350889935	0.408304	6.80730426959147	0.401674	8.99694823584403	0.433857	10.8752281404631	0.396662	8.90224175119959	0.347107	9.17500986208297	0.343035	8.07241291655546	0.302575	6.83992546937434	0.356955	4.52410300608028	0.359823	4.97786432282447
Eif2ak4	chr2	+	0.523852	7.02472285640173	0.54516	6.9662240458526	0.531439	5.51253795694785	0.536454	5.61945674978517	0.543147	4.6946590028938	0.5471	4.90151533080025	0.500448	3.55570830928548	0.493295	3.48876582101098	0.514817	5.66809653140398	0.508292	5.65038676977064
Eif2s2	chr2	-	0.518163	103.959579934679	0.53689	107.450345958826	0.510216	99.1612210299689	0.516848	105.037787330749	0.523106	103.645962902318	0.505898	103.123091092637	0.525641	85.2413301081438	0.518119	83.2755725699457	0.501615	78.6324284138161	0.541872	83.6018586034381
Eif3j1	chr2	+	0.425532	14.0625394876325	0.522727	13.6049283592309	0.568966	15.653048450509	0.469697	17.5768234027636	0.492754	15.4342219293197	0.537313	15.3622089871361	0.490566	16.0514875469314	0.666667	15.7899911525904	NA	9.63386254195703	0.555556	10.4905345441617
Eif3m	chr2	-	0.538881	88.4106051353949	0.503529	90.7851886688573	0.514083	84.9327749650306	0.514673	92.9212429011068	0.523062	79.5979333240108	0.533079	79.2206738233916	0.523774	77.6941496420638	0.508468	75.3809522344074	0.499844	81.9171217278538	0.518852	81.1279335991075
Eif6	chr2	-	0.54037	43.5631295023329	0.541882	42.5343547782045	0.52153	48.1627139471867	0.512546	42.4652847882095	0.537059	56.5305385652619	0.54198	54.9217192435278	0.538977	58.5222325128897	0.548132	58.3599350112571	0.523288	36.3790854418353	0.538622	36.2988119423608
Elf5	chr2	+	NA	0.0395559852268756	NA	0.0479251038048109	NA	0.146861528433713	0.818182	0.182445318585233	0.391304	0.0934838818732838	0.3	0.0813088429458295	NA	0.122821455362804	NA	0.112543267177473	NA	0.0602223132839235	NA	0.0520832742116181
Ell3	chr2	-	0.333333	0.0353836415796572	0.586207	0.0279586892059632	0.421053	0.0176468043877516	0.45	0.0113861223035512	0.581673	0.140487065438722	0.638514	0.139274867383457	0.631313	0.153812841770789	0.646739	0.201344530046273	0.492754	0.652656940512995	0.506329	0.811733470035013
Elmo2	chr2	-	0.522451	6.5351756176114	0.507944	6.51139041942475	0.514497	5.65676644620179	0.52356	5.46731570078284	0.543898	5.01335985685445	0.480211	5.25930122709751	0.588285	5.15552475443133	0.519567	5.28515421400835	0.528497	5.71760222063876	0.50578	5.23157927004721
Elp4	chr2	-	0.499474	7.4547510183774	0.444357	7.6656861050585	0.486325	7.51653878997032	0.467042	7.65428468652969	0.485173	6.61670125371332	0.534125	6.54209899217861	0.430267	5.6513934720545	0.524487	5.12666752867507	0.477239	4.80008863249935	0.469555	5.09517000567826
Emc4	chr2	-	0.468	40.4392643608723	0.455197	40.3812238314668	0.516129	43.6181364803183	0.414716	42.5706765106652	0.464706	44.0046066899242	0.437018	41.9729702285016	0.46087	47.1608469997075	0.534351	48.7179855901448	0.410053	40.7082801858592	0.461078	41.6748987666428
Emc7	chr2	+	0.514	6.28061460059594	0.50152	6.61270509337086	0.574594	6.29293646754289	0.481645	6.80100941732765	0.489474	5.01310638063429	0.450617	5.01198276624545	0.516216	5.06324176577977	0.545714	5.2688847253058	0.504478	3.9674090728433	0.45283	3.79090564292819
Emilin3	chr2	-	0.617647	0.537276862024367	0.37037	0.53498179543203	0.363636	0.450222303601824	0.558824	0.397086201586784	0.574219	0.715403059417732	0.503876	0.750781035393459	0.577075	1.24327299023538	0.563492	1.28103732953298	0.613806	1.68814148246718	0.684906	1.48653460604753
Endog	chr2	+	0.392606	15.7313074109399	0.4	14.8955374344026	0.435746	15.1968369450946	0.401709	17.1945442617325	0.44254	18.7097392384273	0.379142	18.669907340238	0.481696	16.8100630540036	0.398104	14.2471762455892	0.411141	9.11772534339563	0.399497	9.07050063975814
Eng	chr2	+	0.501511	11.2559839266196	0.498684	11.211296235775	0.473552	11.3864610307668	0.489177	9.96685115930074	0.467564	9.34856739556043	0.466817	9.70492598631087	0.455206	7.3109410622172	0.450801	7.59989131131828	0.469551	10.3439307367527	0.527701	9.69920091095794
Enkur	chr2	-	NA	0.00992827355021772	NA	0.0313796434906134	NA	0.156797678960996	NA	0.0559094346295452	NA	0.105587080160658	0.5	0.110723965677687	NA	0.133585052475957	NA	0.108644488444621	NA	0.104644912581566	NA	0.188546175122998
Entpd2	chr2	+	NA	0.0364145559489893	NA	0.069055860181646	NA	0.0423755500100613	NA	0.0468714433172503	NA	0.0154907361025175	NA	0.0429998063303247	NA	0.0527647436525731	NA	0.03187858016204	0.32	0.530940977788431	0.379747	0.486846071133383
Entpd6	chr2	+	0.569431	6.50755187410244	0.564437	6.30632095073697	0.568276	7.75358084640639	0.543909	6.94541537875468	0.537869	8.55345568209611	0.540148	8.22307984543422	0.553474	8.5056545763786	0.53162	8.10854886016475	0.576923	10.6049674654127	0.534201	10.4784290036419
Epb41l1	chr2	+	0.567797	2.78824814492189	0.370629	2.71729937726562	0.54717	2.68974466149914	0.440299	2.48317815803298	0.460465	4.07192434688134	0.444954	3.88144122734952	0.493421	4.54304076681107	0.532847	4.53996553939881	0.510417	4.7988757771357	0.486188	4.14826576470768
Epc2	chr2	+	0.485197	11.2152056643418	0.480149	10.8849599779614	0.5	13.7049583806012	0.526531	14.4692355079711	0.510455	10.8524110943825	0.544133	11.0134188509757	0.567241	11.262829437539	0.476033	11.1317531454654	0.577465	6.97871879504464	0.470054	8.13344926587961
Ergic3	chr2	+	0.529412	22.6807641098096	0.487873	23.5276126493463	0.482975	23.7478895633943	0.483888	22.1199180386366	0.465067	24.5613204379085	0.502582	24.6770637728301	0.497795	21.3721840315418	0.476985	22.2527218908012	0.5459	28.5857321953629	0.481553	25.6937286542167
Esf1	chr2	-	0.56225	25.3112618333303	0.549564	28.4605698765721	0.55909	27.2107329603413	0.56489	28.856371055441	0.56243	23.0968734685027	0.569294	25.0958919392528	0.583055	20.3815653414989	0.57791	20.0850028185321	0.582828	11.9654119988352	0.571379	16.2360160355797
Etl4	chr2	+	0.470313	8.74013165138072	0.493285	7.95941961931342	0.490081	14.394320520104	0.490175	13.3120791864428	0.502364	14.33096039626	0.512845	15.0522177595613	0.522577	13.3858706416683	0.514339	13.7896099021613	0.534377	16.2627168026697	0.530686	15.2437800041104
Exd1	chr2	-	NA	0.105167069759597	NA	0.0993130400096628	NA	0.0852841258064127	NA	0.16920885826479	0.454545	0.189136367004323	0.321429	0.201927811697961	NA	0.092919045425915	NA	0.117890598335091	0.36	0.437079850170002	0.71875	0.428669496595431
Ext2	chr2	-	0.46731	7.27527844444611	0.479957	7.7138511880636	0.447543	6.49909554444702	0.484145	6.52143728636946	0.477509	6.12832235369837	0.463557	5.95622426507015	0.431288	4.54203060808449	0.464964	4.51294201147657	0.486586	4.5288508394752	0.515732	4.38749728303098
Eya2	chr2	+	NA	0.21445137883479	NA	0.128121188673158	NA	0.139125666722199	NA	0.0967801181960638	0.5	0.133503691229797	NA	0.164704399362684	NA	0.129926280691587	NA	0.120198277951506	0.457143	0.450229762540858	NA	0.381434702925845
F2	chr2	-	NA	0.242894758566841	0.133333	0.29055370920137	NA	0.137402305822785	NA	0.143838399627034	0.636364	0.260710145149554	NA	0.289918492988245	NA	0.268854401266746	NA	0.232573463802989	0.328571	1.01042286337397	0.457831	0.863613715687234
Fahd2a	chr2	-	0.370079	1.97035851825804	0.47973	1.78289675378068	0.664516	1.68181403676295	0.504348	1.62771739519905	0.569811	1.99783554097923	0.595041	2.20992944049184	0.517857	1.85293333553971	0.556391	1.84316154391431	0.608456	6.39222697464451	0.570513	5.39151847370854
Fam107b	chr2	+	0.451477	12.9933020806753	0.441485	13.0824815790589	0.373948	8.67714292731276	0.427021	8.8719593567874	0.40148	6.22717159849082	0.415187	6.22942199901046	0.401855	5.37667408047634	0.372171	5.2428994161448	0.459491	8.97010469763919	0.445946	8.72478229957677
Fam110a	chr2	-	0.405882	3.02657593571569	0.47486	3.15164229062816	0.558333	2.48654428115223	0.584746	2.27098195595841	0.470588	2.86277974551283	0.510101	2.92067032725018	0.448276	2.43478092142186	0.542857	2.56657958850592	0.49	4.28052377762565	0.5	3.76602318138834
Fam129b	chr2	+	0.497312	24.5606702114796	0.476622	25.1470935226885	0.484026	34.6511548032615	0.487991	31.2522371008332	0.505252	25.9015187222653	0.490969	25.3697875618178	0.5	23.5285581396253	0.528176	23.7801926021598	0.524927	21.4415286840854	0.521036	20.6528379151706
Fam163b	chr2	-	NA	0.0261879604797057	NA	0.0331082281100693	NA	0.0348284344793745	NA	0.0463487134661285	NA	0.100263121945054	NA	0.11338734556497	NA	0.135522829252976	NA	0.160481017267235	0.727273	0.533645437383676	0.506173	0.549053598548779
Fam171a1	chr2	+	0.550388	3.45059806995927	0.526912	3.39643314600744	0.539823	2.27366481026519	0.391892	2.26789409484241	0.564516	1.74394581498131	0.565217	1.73494721112026	0.624204	1.76221414910998	0.504202	1.75626432626169	0.510949	1.48015894163168	0.58427	1.74127528720503
Fam171b	chr2	+	0.355932	0.688022097498592	0.48307	0.722730168990221	0.503043	0.86344609560891	0.428382	0.959395775364859	0.487214	1.20134470030332	0.453287	1.31336393918738	0.458112	2.47141828556551	0.392197	2.38270187142891	0.418929	1.78451548761733	0.399638	2.02909034521817
Fam188a	chr2	-	0.652139	5.64863239867737	0.669608	5.91865994014436	0.664668	7.39076990312119	0.637897	7.29962781283792	0.671457	8.11275495298978	0.663555	8.34817184120629	0.67449	7.31684525326778	0.726018	6.97615167286709	0.677986	7.06148796979299	0.657702	6.96568056919419
Fam210b	chr2	+	0.62963	1.58536714249357	0.524155	1.59802808174841	0.447761	1.34270860811532	0.566667	1.32364852258701	0.580475	1.3761700996267	0.568966	1.26772088992689	0.557971	0.966774976871254	0.559701	0.843984748774385	0.523105	2.34842047112824	0.576712	2.20679405928477
Fam217b	chr2	+	0.283582	0.492918419987723	0.463158	0.488869240785822	0.5625	0.435151074637208	0.574803	0.456706131835686	0.436364	0.595319057341585	0.45679	0.597669117238418	0.409449	0.781089497614577	0.583333	0.688196942212761	0.485994	1.76166041599942	0.485755	1.70175268087609
Fam69b	chr2	+	0.509934	1.20178623678629	0.427273	1.27602734855843	0.491228	1.11860498734152	0.425414	1.08262433090208	0.462366	1.37573085515735	0.426117	1.3016800105495	0.37931	1.25032836816792	0.5	1.32195682419936	0.508621	0.945622033819659	0.467066	0.874878620412406
Fam73b	chr2	+	0.504	3.36547183727549	0.558068	3.2745893282871	0.477521	2.97677219414573	0.510667	2.70345244276468	0.516878	2.87846252091639	0.515578	2.86350375442895	0.50947	2.80560840181274	0.479554	2.90391470178263	0.51756	2.43976094261219	0.475248	2.55652441159237
Fam78a	chr2	-	0.492537	2.80225645619304	0.463612	3.0076584487753	0.494737	1.94321658294924	0.468354	1.78678053868485	0.480447	2.83118683017223	0.420147	2.78645336132437	0.518519	2.08126127650196	0.541401	2.18061656927602	0.405941	2.23343510197315	0.44856	2.17204941210403
Fam83c	chr2	-	NA	0.0429200365384664	NA	0.0431628102243118	NA	0.0129729780494045	NA	0.0188335406682607	NA	0.0387294402455692	NA	0.0537533664901407	NA	0.0686526171189572	NA	0.0597763507167356	0.171429	0.356421485568599	0.46875	0.29046743985867
Fam83d	chr2	+	0.516667	8.59362352325539	0.538858	8.93819188317545	0.534331	7.5304675732237	0.533098	7.68811462114715	0.571957	7.32080828590598	0.538843	7.50492969926119	0.535129	4.666248981136	0.502041	4.77633946938981	0.55259	5.98938954722983	0.540864	5.94393352467556
Fam98b	chr2	+	0.470256	27.07813019924	0.480847	27.5839932861976	0.487939	28.044363999579	0.477757	28.9002959357314	0.447012	24.7734553741515	0.4673	24.4339472430179	0.482895	25.6032591394803	0.471039	25.6041985189612	0.493187	17.9452880153509	0.485882	17.5828329597064
Fastkd1	chr2	-	0.547249	6.27547291614197	0.559905	6.15119823411976	0.525253	5.69606163019234	0.517405	5.89840236820331	0.524242	5.32039340120336	0.503335	5.32759086508619	0.489971	5.3961573887891	0.515015	5.31412064260046	0.495939	6.23065875303532	0.519481	5.76270944737026
Fastkd5	chr2	-	0.565737	3.16129072381833	0.626486	3.119355127648	0.560144	3.70015150840756	0.588697	3.69692096405154	0.573529	3.85585572569093	0.53866	3.50030308494662	0.56623	4.28278211166093	0.582624	4.09500715835405	0.584565	3.81964343351827	0.581152	4.09998817028656
Fbn1	chr2	-	NA	0.319468070001028	0.818182	0.297867928125207	NA	0.288914040174138	0.733333	0.246724352026159	NA	0.251870922011646	0.6	0.2322128210225	NA	0.306842994750056	NA	0.304844179821302	NA	0.281724300815577	NA	0.25335643540497
Fbxo18	chr2	-	0.581664	10.2532454506814	0.488579	10.2659715308005	0.534965	9.36129335166549	0.549367	9.18936867788952	0.550057	9.03322413958889	0.55527	9.46739630779286	0.586331	8.15665569209466	0.563136	8.27910721438408	0.512043	14.5839342261035	0.511712	14.6130311507416
Fbxo3	chr2	+	0.533472	8.27903873925193	0.521774	8.37263261789477	0.577262	7.79658592640553	0.565825	8.61048556088131	0.560564	7.64626900843482	0.562114	7.97405869152971	0.576897	6.34792602591885	0.541254	6.91311920772497	0.554186	13.3285330099165	0.562956	13.6256966852452
Fbxw2	chr2	-	0.5	8.82479417054248	0.522188	8.77101246820355	0.492114	8.67895508544136	0.467279	8.84071098043698	0.518764	8.95262046889394	0.427184	8.8390653125857	0.471429	8.77912922492239	0.441826	8.91435288950102	0.4075	9.64813941784351	0.435567	9.31318166307702
Fbxw5	chr2	+	0.561404	6.0377338234394	0.585124	5.49300299444891	0.551661	5.14526927278128	0.587583	4.53448963101288	0.534106	5.8396759046775	0.501193	5.54658052297583	0.577726	5.35033117550757	0.610209	5.25119180559109	0.60502	7.28352192675657	0.641212	6.8469073181707
Fermt1	chr2	-	0.56186	2.36590462543327	0.520293	2.46035483833701	0.534722	0.551543919555415	0.267857	0.435355848491898	0.438298	0.622768001149255	0.536585	0.611914968312752	0.436681	1.28909296161345	0.453649	1.30342502808175	0.447111	2.10195682744115	0.464789	2.21657119958442
Fign	chr2	-	NA	0.118151335229575	NA	0.093358295344378	0.583333	0.0956244731694593	NA	0.09254864984018	NA	0.122347135898066	NA	0.115245097908129	NA	0.167339766809083	NA	0.158212923271852	0.405797	0.412377653885602	0.444444	0.377901837285344
Fitm2	chr2	-	0.469681	3.25431388074219	0.413174	3.05916126023745	0.446334	4.50404988924687	0.467643	4.39374587433809	0.471219	4.00800961756572	0.486639	3.83411386872007	0.496291	4.51252281082596	0.50468	4.42047501995873	0.535363	2.80692545974237	0.517572	2.76885405141831
Fjx1	chr2	-	0.513636	1.5379351910331	0.504132	1.39104738050652	0.51586	7.98661482946488	0.54902	8.39010800010131	0.580033	6.61599749905966	0.537572	5.96593271270801	0.644323	5.92177337441999	0.592348	5.11920765644869	0.538889	2.3454951768641	0.621387	2.10738793905408
Fkbp1a	chr2	+	0.506271	58.7093050450409	0.480769	58.1148719432114	0.488684	59.6580945245096	0.522134	61.1429896790199	0.524647	63.7719774997435	0.499856	60.3592070713732	0.517872	63.4133447262609	0.491349	63.7439691874612	0.518311	56.2360684010361	0.50382	55.3051032154593
Fkbp7	chr2	-	0.69697	0.636619620017025	0.427184	0.733929712206638	0.631579	0.555191044441584	0.677083	0.789207790373418	0.422018	0.695542743896473	0.452991	0.677804354599489	0.255814	0.702108642811344	0.348485	0.879376537210644	0.58125	1.36583925771233	0.581152	1.41115321555087
Flrt3	chr2	-	0.116	3.28437288741181	0.0949721	3.36793875786629	0.256637	1.3213158138389	0.144068	1.2019321766907	0.185185	0.795027668517121	0.195876	0.787869193270321	0.277778	0.890222026516589	0.3	0.888930767683936	0.487179	0.615573070893478	0.45614	0.677572556816114
Fmn1	chr2	+	0.488889	0.358336069639072	0.410256	0.301435235797123	0.375	0.29618024224737	0.512195	0.298799743285145	0.473054	0.413917995435718	0.48503	0.421289061084439	0.445161	0.751132530541378	0.370968	0.72697324585929	0.485755	1.87430182343112	0.45197	1.86413865687275
Fmnl2	chr2	+	0.560851	13.0498952196918	0.576982	12.9055974698364	0.60589	8.43437103465633	0.616013	9.10337747026714	0.571126	8.42001746771232	0.603591	8.56102964039136	0.607429	8.65968010993452	0.589786	8.34617477118904	0.582027	10.983911392506	0.58942	11.4937723353
Fnbp1	chr2	-	0.55041	8.32845550489395	0.555987	8.30475092151399	0.559834	8.97641740599969	0.544019	8.30109617085851	0.506148	8.81238683988068	0.506688	9.24057501973421	0.505761	9.94733783427493	0.509245	10.1282984876141	0.429763	9.80565693918435	0.438622	9.09899553839673
Fnbp4	chr2	+	0.511111	16.9341281847978	0.523965	16.6025687239087	0.530949	14.2813392447094	0.490814	15.3314404909214	0.49948	15.670095750102	0.517597	17.144856768363	0.496753	16.1939911650859	0.508554	16.7172378473684	0.504539	27.1837613862034	0.509305	28.7855630897234
Fpgs	chr2	-	0.486567	18.6816134822439	0.569948	19.2803767888112	0.496183	19.5638173146924	0.512129	18.2786793959479	0.521318	22.0628934400566	0.552316	21.9787243179374	0.487879	20.3438202376073	0.458333	20.1487719060782	0.513043	18.7396459867052	0.493392	19.3158524365212
Frmd4a	chr2	+	0.695929	0.905987913971292	0.719882	0.889991531697798	0.627639	0.96216272386014	0.607071	0.88476021838963	0.545822	1.16422047991882	0.521713	1.16257235125094	0.435045	0.871750396030623	0.444915	0.912248918014297	0.528421	0.465217221323267	0.458101	0.447216023809043
Frmd5	chr2	-	0.254902	0.419908053957757	0.318681	0.380885930501476	0.424242	0.432729697310375	0.208333	0.358488141533982	0.475822	1.2273128482322	0.393443	1.29442454503621	0.440771	1.28385943029462	0.354354	1.23081109196264	0.422388	1.84787572327559	0.427083	1.86340648811288
Fsip1	chr2	-	0.776	0.761169314508008	0.726667	0.688250912311656	0.655172	0.691397328366691	0.737931	0.669158083935791	0.591346	1.01257386152922	0.627907	1.03987199718301	0.552381	0.860906885802793	0.566038	0.884465153700832	0.617021	0.923586284571156	0.65873	0.894138468963037
G6pc2	chr2	+	NA	0.0235532446989208	NA	0.00620359973263014	NA	0.0326296028446267	NA	0.0631601009239543	NA	0.11689463271687	NA	0.18026711558497	NA	0.422545626980687	0.393939	0.498300643100257	0.75	0.496506712887003	0.142857	0.375728399191914
Gabpb1	chr2	-	0.451493	6.92933299164219	0.487969	6.95072056730293	0.533679	6.29983176816245	0.526554	6.29180197940971	0.516022	6.1092223295811	0.48878	6.20883478071591	0.473441	5.003339221644	0.477941	4.87648515949324	0.443149	6.37430202957904	0.460377	6.28582496388035
Gad1	chr2	+	0.403636	1.45262378171399	0.376506	1.46841861224586	0.545455	0.478928588253522	0.5	0.456995038390994	0.243243	0.42864935877274	0.270588	0.429894239826486	NA	0.197382551985329	NA	0.270853170158011	0.454545	0.206709889935633	NA	0.174149629367566
Galk2	chr2	+	0.386881	3.48502134219402	0.407489	3.34710699266764	0.367273	3.04068237036716	0.376157	3.23573097854368	0.36721	3.62238955635664	0.45	3.46528589633855	0.390089	3.8441299836872	0.419108	3.95570870525813	0.445639	3.37407220743805	0.424684	3.52527211685966
Galnt3	chr2	-	NA	0.127555843719258	NA	0.106388757005956	NA	0.17081977544065	0.4	0.222333951976751	0.420168	0.492379221119253	0.5	0.450939796955764	0.554054	1.06716513088277	0.519481	0.872397358343893	0.501592	2.88185406393608	0.52	2.90956146589599
Ganc	chr2	+	0.355649	0.860434001869435	0.403698	0.826625572288709	0.436441	0.773269931054311	0.390929	0.767586872970273	0.388506	0.671655792031057	0.395765	0.732127065076955	0.562992	0.671880350573398	0.390625	0.643249186778894	0.341108	0.691403064949782	0.402036	0.715740019304973
Gapvd1	chr2	-	0.486441	9.43093983921083	0.468398	9.07041456915433	0.501799	8.86984250393898	0.501913	8.61718598127264	0.500991	7.87981039364478	0.494081	7.87599982886735	0.505682	8.18358606645774	0.5	8.23421777810738	0.502465	8.17763493981189	0.503986	8.00497170765991
Garnl3	chr2	-	0.625	0.97866477568605	0.419355	0.98645371946655	0.176471	0.61323788175182	NA	0.619756444976245	0.388889	0.810407624520437	0.5	0.926822826197002	0.6	0.672682133456768	0.625	0.716710591428041	0.5	1.83932650955963	0.421053	1.75372365944067
Gata3	chr2	-	1	0.783083217041192	0.9	0.643387211486246	0.990826	1.07837146269948	1	0.871304547617904	0.956044	0.745798335433424	1	0.674737366569627	1	0.790330438862473	1	0.873976358087502	1	0.318242330614287	NA	0.298907777939336
Gatm	chr2	-	0.482759	1.0999938212371	0.546512	1.27723043585549	0.272727	0.527992857706169	0.681818	0.602409719675556	0.551724	0.651743083844941	0.541667	0.626760107968538	0.451613	0.951418130132635	0.238095	0.796826409568459	0.366279	2.88943689158802	0.409836	3.12660448857712
Gbgt1	chr2	+	0.870968	1.63442254052092	0.678571	1.38304546499925	0.711864	1.30074238774339	0.648649	1.08172419969863	0.597015	1.38070309638355	0.670886	1.57410809351639	0.571429	0.779828971260168	0.846154	0.913296286108288	0.757576	1.05886771928083	0.545455	1.1006753155086
Gca	chr2	+	0.326967	8.81965031477452	0.320098	9.14581295120313	0.311039	7.04759220701213	0.30258	7.08422886408526	0.320437	5.1088680928385	0.324451	5.60992955852877	0.304636	6.53570830031121	0.349946	7.05937083982555	0.369492	6.96001478891447	0.379884	7.27988009745538
Gchfr	chr2	+	NA	0.576671070209855	NA	0.740450122505835	0.3	1.11845172615703	0.1875	1.14046578514872	0.219512	6.11585469095115	0.252427	6.38397124680914	0.202703	7.9083306951652	0.240964	8.0984443891957	0.289916	45.1219399041529	0.260965	39.315753671722
Gdap1l1	chr2	+	NA	0.00600699031468599	NA	0.00474647514426817	NA	0.0599170567584123	NA	0.0289948928427641	NA	0.114991696835433	NA	0.0827551828290074	NA	0.354382743415421	NA	0.433845235135484	0.631579	2.53784531032478	0.682353	2.23592378123767
Gfi1b	chr2	-	NA	0.00846887159119664	NA	0	NA	0.0281577425203468	NA	0.0272520304314504	NA	0.0720530850844969	NA	0.0333346403901388	NA	0.0438264537442138	NA	0.10194177656189	NA	0.29754227420733	1	0.347394782203672
Gfra4	chr2	-	0.674699	0.544041875706064	0.735294	0.509067680600032	0.710744	0.565268306831672	0.759124	0.621950495897444	0.714286	0.659793261801455	0.752525	0.601101321400009	0.813559	0.422312922869186	0.8	0.305504286929333	0.8	0.264077357916574	0.857143	0.255576299866032
Ggt7	chr2	-	1	0.413091006750741	NA	0.40144360549224	NA	0.217070832159383	NA	0.210088607760837	NA	0.265949614753516	NA	0.311490971782853	NA	0.108115994346939	NA	0.145485088876761	0.428571	0.579701503447598	NA	0.577099175229411
Ggta1	chr2	-	0.618644	9.22180804912198	0.65873	9.50754552321229	0.531469	11.3748250648371	0.604167	11.721165420347	0.567797	12.4908207856743	0.611336	12.7536323719023	0.423729	9.31294924196752	0.557895	9.18379312971405	0.568182	10.4818728173958	0.619355	9.89277156555717
Gid8	chr2	+	0.552365	34.184992000658	0.548048	33.5370831273076	0.549451	45.8822643563485	0.550173	47.8421615609513	0.588488	50.0439965197967	0.581907	49.803765584512	0.58596	45.0357365920878	0.592417	45.5646342361522	0.54094	45.0087331734965	0.509901	43.3310606214175
Gins1	chr2	+	0.494546	34.4616596471509	0.478329	35.6391403088383	0.493527	29.9875778757216	0.453695	30.8981130187426	0.467608	30.2317587254842	0.468187	30.3670658076499	0.463147	30.5467491670142	0.466856	30.070501114116	0.462559	30.3499007731203	0.458378	29.5330122251372
Gle1	chr2	+	0.494488	9.31358831501447	0.518182	9.17386738578712	0.542611	12.2726610170095	0.530943	11.6362073407408	0.526471	11.6036598843075	0.521995	11.2811498545218	0.54321	11.1521800758761	0.514507	11.5821003966281	0.511011	11.2845363793323	0.507801	10.7516221501636
Gm10130	chr2	+	0.598214	13.7078329478102	0.677966	12.1650748103491	0.528	11.4366434905042	0.655462	10.6161498745091	0.524194	10.8067737678712	0.663866	9.3617532145177	0.580247	13.0759045260212	0.685714	14.4966528163933	0.557895	9.07503936332355	0.614286	10.6849055215742
Gm10134	chr2	+	0.714286	1.17964046022259	0.534091	1.47850832052952	NA	0.879098024355708	0.419355	0.785373475426052	0.630435	0.922884659349986	0.409836	1.28089011892817	NA	0.589414039331631	NA	0.845744588655906	NA	0.643113025747338	0.75	0.834294555685983
Gm10762	chr2	-	0.666667	1.24476715452955	0.594595	1.27539002023036	0.428571	1.37576542945286	0.531915	1.99176744038158	0.584906	1.70688861753565	0.603175	1.62421784884167	NA	1.50069823429878	0.25641	1.39207822779973	0.571429	1.17743229162274	0.433333	1.14299254123107
Gm11448	chr2	+	1	0.551041244867195	1	0.544262483209417	1	0.687048917496461	1	0.66494954252739	1	0.488359798906034	1	0.429276091246343	1	0.641619282815289	1	0.79143888348958	NA	0.484002099377256	1	0.601722073372532
Gm11454	chr2	+	NA	0.043411862778403	NA	0.0857556433628284	NA	0.0902112549233798	NA	0.0349238205108924	NA	0.230842341919869	NA	0.256312571067034	NA	0.202190950467003	NA	0.0712580027151482	NA	0.419434592422517	0.8	0.527633531638319
Gm11457	chr2	-	0.483871	8.22344714916605	0.540323	7.51415448757492	0.413462	6.60758780347361	0.508197	6.44593944286756	0.463158	8.37188226696059	0.429907	10.1947308028535	0.488189	7.61650101029034	0.615385	8.69890551240733	0.495833	15.5016488716364	0.526531	15.3126788503321
Gm11469	chr2	-	NA	0.343706421634654	NA	0.296271916263191	NA	0.285693224261381	NA	0.326777118933571	0.909091	1.21843800634318	0.731707	1.16839258706162	NA	0.12935872637405	NA	0.170961740385134	NA	0.603782860866285	NA	0.640859326041047
Gm11688	chr2	-	0.631579	1.55986716028762	0.545455	1.66989625530162	0.761905	1.17110610936897	0.708333	1.9025544946502	0.5625	1.10594467447065	0.6875	1.25437818870685	0.684211	1.66654359172802	0.714286	1.81707906923628	0.647059	1.14911212717409	NA	0.879139392914414
Gm13261	chr2	-	0.640068	4.42149822398034	0.622126	4.41813074605292	0.685446	2.79113622732937	0.684318	2.88470757419971	0.630882	3.91046927212258	0.654696	3.90734275004411	0.648649	2.90930312060854	0.635697	3.25886599083945	0.627226	5.4717149102392	0.614272	5.74790778528493
Gm13375	chr2	+	0.338235	3.37545024849123	0.115385	3.71392227272	0.197917	3.81637974516843	0.162162	3.69362341026266	0.285714	4.40038483908892	0.246269	4.79780717043784	0.275862	3.83168424163697	0.23913	4.46822721943348	0.245399	6.61500234621652	0.294798	6.49297390547339
Gm13384	chr2	-	0	0.80718932353593	0	0.792703728335145	0	1.23645801279357	0.0242718	1.22451645666316	0.0206612	1.22634994144931	0.00389105	1.11958755000808	0.0135135	1.51573007659118	0.0198675	1.47637674375448	0	0.617831920940554	0	0.560610627365714
Gm13420	chr2	-	0.14321	3.32405150575823	0.159363	2.90713989083674	NA	0.247961055237609	0	0.297124566436391	NA	0.352505354389095	NA	0.167742599213439	NA	0.235240800298915	NA	0.12435860418849	NA	0.361837041525733	NA	0.226607962115747
Gm13421	chr2	+	0.520833	1.40891227380817	0.478261	1.08276378197639	0.52	1.47591454879377	0.57971	1.33528161559828	0.621528	3.27042941297285	0.513514	3.31727411404233	0.44	2.53691310453119	0.461538	2.44992644951409	0.629412	2.67843627535203	0.537879	3.37204150706899
Gm13431	chr2	+	NA	0.0188311482526001	NA	0.0743979700620407	0.482143	1.95658675623612	0.488889	1.99969637637338	0.646341	1.90923165611199	0.553571	1.74186659778605	0.515152	0.760120049507785	0.5	1.03034050098453	NA	0.0827008447447468	NA	0.157352436113584
Gm13499	chr2	-	0.192308	0.668240315603875	0.181818	0.446782635470417	0.0227273	2.07225575239915	0.0227273	1.61275075612986	0	0.619560938910641	0.0769231	0.708153803312899	NA	0.345814704668274	NA	0.196875344151637	NA	0.0451494495687739	NA	0.0585712595755223
Gm13522	chr2	+	NA	0.0681232308214939	NA	0.0538281576800523	NA	0.113249821565351	NA	0.0274017668623925	NA	0.265646264240096	NA	0.513939565575437	NA	0.141015226992371	NA	0.11182025041454	0.803571	1.82498044339364	0.860656	1.73358055539244
Gm13580	chr2	+	0.503704	12.9789197802753	0.575419	13.0247974117872	0.526316	7.71564431419943	0.517857	7.81991235414831	0.460674	4.03802801922304	0.555556	4.00575188363126	0.5	1.19028312183048	0.727273	1.10865366061766	0.2	0.553160526563008	NA	0.43680085983795
Gm13610	chr2	-	NA	0.847421472784724	0.2	0.695351122081432	NA	0.650204022867313	0	0.694840807451729	0.607143	0.670146727205442	0.583333	0.801819031466273	NA	0.961416906426696	0.542857	1.14132691625356	NA	0.186081248774773	NA	0.371382434532492
Gm13625	chr2	-	NA	0.322875729414372	NA	0.229610735103973	0.909091	0.348892028416172	0.4	0.415593464079619	NA	0.297594252458365	0.6	0.423627721624681	NA	0.200506025879778	NA	0.388653023142204	0.571429	0.340313976124633	0.428571	0.392427439155999
Gm13655	chr2	-	0.177489	4.28536270127424	0.259615	4.29017641966081	0.269542	5.30849037763624	0.257453	5.33856302180128	0.274603	7.37456072173542	0.268325	8.2155346604475	0.277778	6.91140234173516	0.356467	5.75936828924824	0.252414	11.346844519377	0.239157	9.95554174503139
Gm13657	chr2	+	NA	0.223798339521875	NA	0.227360810417549	0.385714	0.651084262970473	0.320388	0.694441889436805	0.57631	1.51305904689428	0.564797	1.54682014909889	0.464646	1.83650697247285	0.651163	1.86299803488485	0.601587	4.73877119925998	0.635842	4.40190655061526
Gm13662	chr2	+	NA	0.130601418639521	NA	0.223590978003869	NA	0.41613742369431	NA	0.315197290172745	0.787234	0.586443297843623	0.787234	0.671140547742472	0.772727	0.788506843347441	0.714286	0.881317376277522	NA	0.229425152443573	NA	0.363767008206404
Gm13777	chr2	-	1	0.583983927984256	0.90678	1.27783365623081	1	1.60560344849716	1	1.806928104694	0.961771	2.22946864717972	0.908676	1.97447355470286	0.984169	2.55717830107543	1	2.16293856357401	1	2.91979527341714	1	2.149819884072
Gm13778	chr2	-	NA	0.370102328642146	0.125	0.566601614982938	NA	0.576813456853372	0.5	0.539651214551147	0.3	0.524804560018425	NA	0.531115352484674	0.25	0.933699702604339	0	0.911251592930433	NA	0.325076036895172	NA	0.421713068943761
Gm13816	chr2	+	0.0952381	0.823671790841699	0	0.873484195080848	NA	0.73869769975581	0.0454545	0.924186864177055	0.12	0.753030319292172	0.137255	1.09491472666071	NA	0.358947850526036	NA	0.664144517613633	NA	0.190385441188606	NA	0.131723895660755
Gm13884	chr2	+	NA	0.0934742763081415	NA	0.0738595046574903	NA	0.0310788111050872	NA	0.150395704733276	NA	0.331365967291489	NA	0.257549302411145	NA	0.328936303011457	NA	0.306864981535681	NA	0.492613716947599	0.304348	0.468640729510783
Gm13886	chr2	+	0	0.18340869836556	0	0.175976669338632	0	0.261345742073886	0	0.252939386422084	0.0405405	0.390109898534406	0	0.369555206015782	0.102941	0.393215536805651	0.0609756	0.573437181613027	0.221053	0.632874680874212	0.17757	0.617003412366998
Gm13889	chr2	-	0.319149	0.757087917247493	0.409091	1.00289746367253	0.416667	0.333159496630827	NA	0.295572937815246	NA	0.236812402486762	NA	0.167990303402891	NA	0.0921866785654152	NA	0.060917401746427	NA	0.0195582744899214	NA	0.0338299516513793
Gm14002	chr2	-	NA	0.076425674591919	NA	0.0690153201674499	NA	0.199653172572941	NA	0.202014434811509	1	0.131593957789051	NA	0.168317037686735	NA	0.259902139921657	NA	0.185185468133978	NA	0.0958968583655183	NA	0.0663491267329622
Gm14005	chr2	-	0.285714	0.371346560187092	0.384615	0.383245953946974	0.492958	1.05829050861313	0.528926	1.24373202942165	0.368421	0.505076271240226	0.390625	0.58168539966851	0.465116	0.690250573199822	0.487179	0.738086559174704	NA	0.0998476213568606	NA	0.132408280204225
Gm14023	chr2	+	NA	0.156633705903435	NA	0.199399927172456	NA	0.115729744665322	NA	0.182011736093264	0.4	0.209767123056214	NA	0.182676075355281	NA	0.144103151671036	NA	0.21901533232045	NA	0.22165312313564	NA	0.185086495727703
Gm14027	chr2	+	NA	0.0498329100060767	NA	0.0196879515630416	NA	0.0621326392430481	NA	0.020044700839853	0.5	0.105994490116261	NA	0.130766113427554	NA	0.0773656691497536	NA	0.0272659238684972	0.307692	0.284506861068825	0.473684	0.39747473740881
Gm14029	chr2	-	NA	0.0574852930708081	NA	0.0999294989572187	NA	0.267582108075402	NA	0.249726042955854	0.467742	0.464630149923582	0.628571	0.467624666007066	0.454545	0.571174435740614	0.46875	0.553571071537858	NA	0.272655114402525	NA	0.262006450475074
Gm14057	chr2	-	0.371429	0.77168639063352	0.603306	0.889225530139868	0.503937	0.988880055006576	0.442308	0.982938898445572	0.444444	0.592718843070602	0.594406	1.01248783259675	0.413043	0.332790084447764	0.44	0.562967789085652	0.633333	0.931980183577834	0.565217	1.02584766252398
Gm14117	chr2	+	NA	1.1398317565091	0.769231	1.22023261360118	0.647059	1.57397772469162	0.666667	1.34587207228631	0.851852	1.30345142056771	0.71875	1.35078447891713	0.692308	1.29389416463344	0.809524	1.06624963967839	0.615385	0.888126628083266	0.833333	1.08930036491701
Gm14122	chr2	-	NA	0.302633777210593	NA	0.302057287701013	NA	0.185354923785016	NA	0.153765310450835	NA	0.271032159721746	NA	0.26122983861748	NA	0.29674067550553	NA	0.261450225789393	0.516129	0.531631288498913	0.456522	0.483980397725796
Gm14124	chr2	+	0.704042	9.85958489822019	0.722763	10.0385590218198	0.712361	12.9205832086344	0.715172	13.7236728396868	0.709627	10.7696442730918	0.700811	11.3191979694547	0.701717	12.6336069851884	0.680645	12.1772796117717	0.75067	4.44280008592132	0.729055	5.41830728615987
Gm14127	chr2	-	0.524752	1.64580902781131	0.515837	1.69780995868424	0.527536	2.62203403248096	0.564444	2.05957822906714	0.585153	1.86376250688697	0.480969	2.00941998929937	0.625899	1.34853610326222	0.45082	1.50083226957569	0.75	1.18457372220374	0.592391	1.63222032215327
Gm14137	chr2	+	NA	0	NA	0	NA	0.0210012507386023	NA	0.0162605854873017	NA	0.0429922222708279	NA	0.046409818867262	NA	0.0784503524798609	NA	0.110592791954387	0.166667	0.51041548424301	0.287671	0.568104933111391
Gm14139	chr2	+	0.504132	18.4577291981883	0.582677	17.6814439532226	0.579104	20.1358412126513	0.571038	22.5546036234877	0.521212	16.8000857904914	0.577957	17.362852868256	0.557554	20.5797157118272	0.565957	20.9342651101596	0.568807	8.57874814814179	0.581699	10.6214301674341
Gm14164	chr2	+	NA	0.0465173637175283	NA	0.0428821116085459	NA	0.0193329172632196	NA	0.03742212282858	NA	0.14291669952978	0.545455	0.147496195223	NA	0.056169772132404	NA	0.0848394429525026	NA	0.2451486371283	NA	0.241463606884382
Gm14200	chr2	-	0	0.484313594121558	0	0.510246078008829	NA	0.469662345944846	0	1.42860253277369	0	1.03013395081742	0	0.635441582437021	NA	0.584809242149352	0	0.971632557855511	0	0.496291215181757	NA	0.367900724208749
Gm14221	chr2	-	0.5	0.774901750594493	NA	0.540260553185819	0.3	1.02299563083113	NA	0.880080276874487	0.0909091	1.64821432130787	0	1.34564099810193	0.107692	3.25527430251875	0.159091	2.49403009503019	0.0714286	0.800738767352078	NA	0.554015208220235
Gm14230	chr2	-	0.572134	15.6434199557162	0.632941	14.9799824177902	0.608966	18.1631306812356	0.63932	16.1870925221255	0.650868	16.0079852469738	0.579769	16.1662061122814	0.611801	19.5013740743109	0.58033	21.0003884924868	0.669118	11.1479962910621	0.646701	11.0439241788743
Gm14233	chr2	+	0.459016	0	0.639053	0	0.707317	0	0.664286	0.0284004645156915	0.509317	0	0.504274	0	0.595745	0	0.45283	0	0.579618	0	0.587571	0
Gm14267	chr2	-	NA	0.333566978732729	NA	0.243296143156528	NA	0.426561827915849	NA	0.371557070534759	0.813559	1.00057160785798	0.944444	1.51496006408826	NA	0.265570895205004	NA	0.224627876108679	NA	0.85641927766464	0.5	0.760165734788939
Gm14276	chr2	-	0.59322	7.9857930408488	0.553846	7.39856813112802	0.636364	6.60211069156755	0.423077	5.99147244048117	0.439655	6.30289365463101	0.38806	6.21320658382865	0.68	6.21568680227312	0.616438	6.12422945557413	0.521277	5.69080593408415	0.587302	6.01722073372532
Gm14282	chr2	-	NA	0	NA	0	NA	0	NA	0	NA	0	NA	0	0.428571	0	NA	0	NA	0	NA	0
Gm14400	chr2	-	0.00625	6.15565980800122	0.0253165	6.0856703186964	0	5.56316541509137	0	6.39449428337962	0	4.56507760499634	0	5.00495815000513	0	5.07134679040188	0.00961538	4.71844794372175	0	2.59499369147964	0	3.00524057620637
Gm14401	chr2	+	0.628032	17.4105088583533	0.675	18.5669678950391	0.704114	25.008270416773	0.619048	26.6523934864604	0.641548	19.1485546433359	0.668394	19.7603684868	0.595376	16.1491083597979	0.640379	15.9257614736375	0.508876	6.55533317440979	0.595745	7.52964612376071
Gm14412	chr2	-	0.135922	51.1503774143209	0.238806	46.8690553021848	0.196172	70.6522908397985	0.183391	77.5590459055608	0.147208	46.6281673272379	0.247059	55.4333352623112	0.2	42.0542682996422	0.106796	43.6589354269801	0.15942	12.4846366952743	0.178571	13.9025052923008
Gm17096	chr2	+	0.533333	1.58574710217154	0.84375	1.36993762826927	0.464286	1.35324266662417	0.5	1.80298392329221	0.307692	1.12429353431642	0.533333	1.09576829495279	NA	1.2911165650103	NA	1.22625981752917	0.744186	1.96852832028437	NA	1.30095317482821
Gm17250	chr2	-	NA	0.751884866913468	NA	0.58198364541205	NA	0.471920976745712	NA	0.506118773087061	NA	0.794189078914021	0.365854	1.1576361501823	NA	0.619384951232581	NA	0.638076610451288	0.636364	1.19952252970663	0.576923	1.30550118372689
Gm17619	chr2	-	NA	0.117652439703788	NA	0.0676102463614183	0.9	0.186698075406647	0.533333	0.215110488654047	0.578947	0.2426632541148	0.666667	0.259614504349701	0.724138	0.45387147335105	0.888889	0.444760094241408	0.894737	0.573061491886891	0.785714	0.438738751851428
Gm20458	chr2	+	0.542453	0	0.594771	0	0.521197	0	0.476124	0	0.634146	0	0.520376	0	0.598214	0	0.530612	0	0.510791	0	0.446078	0
Gm20716	chr2	-	0.485226	0	0.493116	0	0.519164	0	0.497218	0	0.519534	0	0.514395	0	0.498378	0	0.486096	0	0.48996	0	0.493258	0
Gm21985	chr2	+	0.416107	0.10601038953411	0.460905	0.172934240031236	0.451087	0.39510618738419	0.465116	0.401654760076949	0.528571	0.790405808688386	0.518987	0.681992024927994	0.519084	0.987487753229621	0.482014	1.02160579620786	0.449511	0.267325188659244	0.462908	0.270161873381888
Gm22516	chr2	+	0.0869565	5.74927105279785	0.166667	4.54283604936893	0.114286	5.19442225929784	0.175	5.93226154371714	0.0967742	5.49404773769289	0.108108	6.31341959324524	0.103448	5.04499032858796	0.117647	6.70170022309725	0.0909091	2.63468884741652	0.0952381	4.08251126218741
Gm23925	chr2	-	0.590504	0	0.598854	0	0.570533	0	0.558642	0	0.58465	0	0.525862	0	0.505495	0	0.548148	0	0.61478	0	0.616588	0
Gm24451	chr2	+	0.40121	0	0.407654	0	0.360382	0	0.363229	0	0.473684	0	0.469298	0	0.39881	0	0.357309	0	0.405321	0	0.441718	0
Gm24644	chr2	+	NA	1.78394647618876	0.857143	1.58580076043032	NA	0.834097157032574	NA	1.16605360425217	0.913043	1.34386779195366	NA	1.02402096738052	NA	1.26939066744032	NA	1.34211115905222	0.75	3.62348694003207	0.612903	2.54089708806043
Gm25184	chr2	+	0.703125	0.190159938796195	0.627907	0.450769541308413	0.52	0	0.759259	0.305958378463523	0.67	0.134823257366697	0.495798	0.311873169294243	0.659091	0	0.770833	0.104045427277333	0.673077	0.0835126321778241	0.6	0.216677727141349
Gm26003	chr2	-	0.676768	0	0.820988	0	0.814433	0	0.785455	0	0.78635	0	0.764228	0	0.805405	0	0.781726	0	0.744681	0	0.749186	0
Gm26883	chr2	-	NA	0.0333291075524513	NA	0.0215470484555048	0.705882	0.458368412699252	0.77193	0.446062193117714	0.956522	0.23630312850292	0.818182	0.234548134436187	NA	0.0909431046023626	NA	0.0696280542659454	NA	0.00532260373215458	NA	0.0023016272091261
Gm27003	chr2	+	0.0666667	1.24732676152031	0.6	0.936306686406543	0	1.03679414109124	0.8	0.752583737769934	0.375	1.50340139301053	0.368421	1.57517913392839	0.5	1.54918136695845	0.6	1.91091883337524	NA	1.3694727409442	0.214286	1.53970524417344
Gm27027	chr2	-	0.518868	0	0.468354	0.0895495859028292	0.450292	0.0471011597918049	0.544944	0.022793060187182	0.541436	0.0401758518295641	0.486772	0.0557608701224442	0.563492	0	0.335938	0.062008792125065	0.515385	0	0.419118	0
Gm27494	chr2	+	0.3	0	0.8	0	0.75	0	0.5	0	0.636364	0	0.727273	0	NA	0	NA	0	0.545455	0	0.705882	0
Gm28035	chr2	+	0.374817	0	0.388466	0	0.395813	0	0.385309	0	0.426087	0.0051855098987191	0.436027	0.00239902437918649	0.367647	0.0037849179024026	0.376712	0	0.413893	0	0.37123	0
Gm28036	chr2	-	0.531273	0	0.522984	0	0.515715	0	0.50378	0	0.519669	0	0.515835	0	0.536854	0	0.50935	0	0.522573	0	0.497081	0
Gm28042	chr2	+	0.488909	0	0.478397	0	0.50269	0	0.473479	0	0.494804	0	0.498486	0	0.51962	0	0.476829	0	0.467674	0	0.455861	0
Gm28045	chr2	+	0.888255	0	0.850585	0	0.92	0	0.90027	0	0.83871	0	0.855442	0	0.857843	0	0.884211	0	0.827273	0.0121180050845567	0.76	0
Gm28230	chr2	+	NA	0	NA	0	NA	0	NA	0	0.8	0	NA	0.00288263830989292	NA	0.00909582198490629	NA	0	NA	0	NA	0
Gm28635	chr2	-	0.469719	0	0.435632	0	0.401709	0	0.480126	0	0.492188	0	0.448078	0	0.442857	0	0.45904	0	0.468366	0	0.474957	0
Gm29232	chr2	-	0.943396	0	0.679487	0	0.712121	0	0.87013	0	0.619048	0	0.717647	0	0.531915	0	0.635294	0	0.666667	0.0458335321379977	0.75	0
Gm34653	chr2	+	0.990099	3.34271343393703	0.967213	3.82584510256032	0.976096	8.43655656043448	0.996032	8.52374045935846	1	2.44179899453017	0.962121	2.96373276618992	NA	0.69194236382041	0.846154	0.864597099610465	NA	0.854121351842217	0.615385	0.723297632954195
Gm37499	chr2	+	0.2	0.325289406517527	0.4	0.292239846864171	0.6	0.337054978573415	NA	0.322628623638577	0.2	0.388595670923649	0.454545	0.400485321650934	NA	0.267495100656173	NA	0.341333618526271	0.5	0.547946597555476	0.481481	0.477276615189729
Gm37780	chr2	-	NA	0.140665560705888	NA	0.163453094930751	NA	0.185701289099083	NA	0.159758299058903	NA	0.217063284884823	NA	0.238841897509697	NA	0.154153057803994	NA	0.14487478608611	0.2	0.225301297594525	NA	0.219994026221996
Gm4430	chr2	-	0.387097	1.30362157774275	0.4925	1.43634954935461	0.382353	1.78727118701953	0.330224	2.16013895036022	0.369781	1.82275712477076	0.394393	1.82284850725901	0.310627	1.73090992850639	0.321981	1.64251606660634	0.258503	0.707086679615525	0.428571	0.615469308059677
Gm9873	chr2	+	0.267267	1.60560098212819	0.419664	1.54760897135962	0.297778	1.45764419490891	0.48374	1.51152655929031	0.332061	2.50279911636267	0.340864	2.94329444208889	0.376682	2.08608767557506	0.331615	2.65419044058907	0.422713	8.19153993963482	0.431982	7.8370152801323
Gmeb2	chr2	-	0.468809	6.07741709768576	0.530323	5.96828331502548	0.461219	6.4023441251769	0.488856	6.01394070514573	0.489796	6.18796314963084	0.501155	6.23925159210817	0.476008	6.28691709053674	0.507168	6.1642743832338	0.524927	6.39692028898268	0.445113	5.92653548348465
Gnas	chr2	+	0.526201	9.79260785482188	0.495434	9.9688198527053	0.54126	9.79809391772062	0.532888	9.33023302648978	0.561282	10.868253919155	0.519311	10.931458483061	0.53159	9.8299217407894	0.5311	9.87302369534139	0.5	14.2344093643119	0.502547	14.0282460303334
Golga1	chr2	-	0.436275	3.55957021626037	0.55988	3.80583329816454	0.5	2.79464205069045	0.472803	3.03809038697356	0.460396	2.0879944569233	0.518657	2.57597276698675	0.469613	2.36879898509323	0.4	2.51667461733568	0.475728	2.43037793823083	0.497561	2.50962029993178
Golga2	chr2	+	0.527027	8.21677638084924	0.511962	8.42073018340098	0.496894	7.27256893918129	0.436047	7.01597329814411	0.494186	6.50695035696936	0.502994	6.73244579850365	0.465839	6.63201022328167	0.416667	6.79301244283459	0.484375	7.90023426756239	0.497653	7.22423240264454
Gorasp2	chr2	+	0.468411	23.1928374375761	0.459722	22.4887419781126	0.465364	23.15371427329	0.459972	22.8902262604046	0.466527	20.3061064756224	0.456574	19.4412930562927	0.453882	19.314365745061	0.47259	19.3979583661422	0.451847	16.6733322729531	0.437564	16.4421889887147
Gpat2	chr2	+	0.544715	3.23760320453863	0.496815	3.1686514433425	0.465517	3.7450440422895	0.521472	3.33518499141521	0.61753	4.75398194654248	0.503731	4.65410181839718	0.468571	4.41296367461429	0.485915	4.38182486863523	0.565445	4.88456741987107	0.55814	5.20996702897748
Gpcpd1	chr2	-	0.4307	2.61312731919504	0.457788	2.45959750266404	0.438409	2.87193328371111	0.486923	3.15415426435513	0.476475	3.18381913074698	0.482738	3.25418622433929	0.494312	3.35157829512857	0.508989	3.39467298378564	0.412736	1.55753522342129	0.472776	1.90264586359899
Gpd2	chr2	+	0.587334	24.9118666315719	0.601607	23.805562323886	0.643662	30.9947027971591	0.653475	30.4146641417132	0.704377	40.2242481183232	0.692592	39.6529519587269	0.728722	46.1791493289031	0.728137	46.3645107322735	0.76433	34.6206723855971	0.764366	34.0367436233609
Gpr107	chr2	+	0.566453	6.3614055665285	0.574054	6.24286036474659	0.524766	5.29272810434299	0.531618	5.01505351256974	0.583064	4.98449482202405	0.544166	4.89398530355694	0.529503	4.67292439446589	0.515394	4.53012453733041	0.522798	4.94876128213825	0.492361	4.74564844562926
Gpr155	chr2	-	NA	0.204196299003789	0.272727	0.190683367376858	NA	0.100295357771979	NA	0.125070049827824	0.666667	0.131613660432829	0.818182	0.156791095651476	NA	0.220949895265035	NA	0.203137052207879	0.520548	0.446346823005208	0.670886	0.445953625272351
Gpr21	chr2	+	NA	0.0788809711293617	NA	0.0590480326010753	NA	0.103526658476228	NA	0.110216321842706	NA	0.07653106947764	NA	0.1525195976061	NA	0.0902357684109368	NA	0.10903447937555	0.727273	0.189620431379383	NA	0.201837847088004
Gpsm1	chr2	+	0.516667	0.993279227029909	0.562724	1.15566044642089	0.559259	1.00271745459438	0.538462	1.00520655811195	0.507886	1.2349615015063	0.554187	1.41466318482728	0.416357	1.46012190497628	0.545817	1.51856456241333	0.525641	3.0446816069408	0.550704	2.75129324795605
Grb14	chr2	-	0.5	0.22001385820637	0.571429	0.223272605324949	NA	0.20618639225494	0.615385	0.209965800223941	0.457831	0.313508639172454	0.596059	0.348099939940447	0.642857	0.42194169955494	0.505051	0.405987139756062	0.618812	0.89803103511803	0.591463	0.827456604483423
Grin1	chr2	-	NA	0.0543230093200263	NA	0.0580733680537884	NA	0.00664029237271064	NA	0.00514136244222209	NA	0.013593520175735	NA	0.014674114893391	NA	0.0132292635632018	NA	0.0192323145472431	1	0.148755799873036	NA	0.148070559516594
Gsn	chr2	+	NA	0.819820033888377	NA	0.802946631469072	NA	0.946678109315681	NA	0.770105088649278	0.636364	1.47227253281222	0.5625	1.61346206044193	0.617647	1.65638174055895	1	1.69218006447725	0.584416	5.45019785646546	0.556818	4.97464241844254
Gss	chr2	-	0.380203	17.3583232381691	0.363636	17.9268468212143	0.370941	17.5036310753985	0.379299	17.0207128779861	0.392041	11.1274204391481	0.418773	11.2894818284263	0.464942	8.23854345390046	0.466003	7.9937143116856	0.418514	4.85817618663804	0.471783	4.81063628287431
Gssos1	chr2	+	0.129032	0.324679504439033	0.107692	0.478890173773649	0.2	0.287869658168908	0.272727	0.24378387557743	0.358974	0.291583539151299	0.238095	0.255596614164612	NA	0	NA	0.189490554706204	NA	0.095059769867216	NA	0.0328849809348603
Gssos2	chr2	+	0.129032	0.428023981916406	0.121951	0.605953915425905	0.2	0.326130815267307	0.272727	0.258251404606438	0.358974	0.467847563393871	0.266667	0.280793518591273	NA	0.0922927622001279	NA	0.0585480022308583	NA	0.0313292498158466	NA	0.027095105120092
Gtf3c4	chr2	-	0.503686	17.6737619188149	0.494624	17.0849865190873	0.505852	14.6354248140973	0.499023	14.3698769135911	0.470121	14.6614325105182	0.49197	14.3168591995382	0.475965	14.7847541517327	0.504176	14.2806162498061	0.501952	18.2894050571214	0.46971	17.208187456434
Gtf3c5	chr2	-	0.473862	8.3675794296651	0.506205	8.64732826941278	0.535365	8.81693943876009	0.50457	8.28999594137766	0.521934	9.66759628229117	0.492837	9.4179131375929	0.507234	9.79313642191758	0.490827	9.77769184536704	0.564736	7.84214750245098	0.548098	7.17470956193765
Gtsf1l	chr2	-	0.451042	33.9750110601284	0.489069	34.6222448260589	0.425	35.935291236756	0.443396	33.126135968974	0.478589	50.2618479166065	0.47658	52.1711453959972	0.465546	64.2985260607171	0.441453	65.6093756386044	0.47987	67.4500644649942	0.513363	69.4768433337866
Gyltl1b	chr2	-	0.496491	2.94720213520606	0.475073	2.68331567766987	0.568895	2.94411702053799	0.570136	2.68921794385595	0.554042	3.67273843969122	0.49531	3.46798476102685	0.539913	3.38562170819101	0.515982	3.32098672444966	0.558494	9.21418893039867	0.546641	8.93903585920536
Gzf1	chr2	+	0.54387	8.74363647920351	0.544744	8.66961940774214	0.570829	8.70237636861363	0.550022	8.78768290773005	0.54132	9.462244113531	0.564299	9.70781952417202	0.54681	9.72400422468834	0.560618	9.79185661818024	0.542146	17.3809731992098	0.544162	17.6355416921246
H13	chr2	+	0.531088	1.94161559750489	0.511628	1.86500570070944	0.498765	1.98510658498281	0.535637	1.92406114110702	0.521851	2.33762949667707	0.526248	2.21560540945173	0.527728	2.59998808885079	0.542279	2.66875818273244	0.518887	2.06701284913161	0.581081	2.06726746426168
Haglr	chr2	-	NA	0.0442079238317967	NA	0.134734905684483	0.2	0.136485879087011	NA	0.127015117383747	0.316456	0.344777241892708	0.410256	0.348016905784579	0.486486	0.457552463295337	0.314286	0.497586444387441	0.34375	0.671197899121118	0.256198	0.633256992281075
Hao1	chr2	-	NA	0.271419177090891	NA	0.262718646120133	NA	0.282008914252597	1	0.316607980515997	1	0.288653996726422	1	0.289342927204248	NA	0.210689344181903	1	0.297012340564015	1	0.256278475890705	1	0.242260371808213
Harbi1	chr2	+	0.569948	3.31427198267867	0.529933	3.05271060844509	0.535783	3.48334907727659	0.520992	3.56541708446259	0.549784	3.96027635780726	0.471622	4.06282334597528	0.514344	4.13929404894259	0.521127	3.9879487661263	0.5425	5.87815049669821	0.519388	5.89694560950774
Hat1	chr2	+	0.53961	153.358587619387	0.533727	155.772505362013	0.534498	134.012926520246	0.538247	148.775547983097	0.522348	136.410770856591	0.522216	135.053574521445	0.517275	146.470832987104	0.51245	139.512552219529	0.50797	183.28372119544	0.510889	184.045205534316
Haus2	chr2	+	0.561209	24.5714650810013	0.558362	24.3624267849287	0.56136	22.3256204137533	0.526579	23.6376854352059	0.536468	21.9010703477702	0.543406	22.2992998823642	0.526632	22.9641084208362	0.533754	22.9199660678517	0.563006	21.4340698200561	0.528198	22.1188592026461
Hc	chr2	-	NA	0.254796106340727	1	0.216966568526021	0.9	0.32282525951799	0.727273	0.316421520137236	0.672727	0.313945585011022	0.611111	0.290487580542638	0.291667	0.450618490724226	0.1875	0.462898355068013	NA	0.102121352771638	NA	0.0845613795467836
Hck	chr2	+	0.36413	1.34829941308028	0.400862	1.50439665829754	0.207194	4.4952113089067	0.218391	3.96323595047247	0.259634	10.8462797116021	0.2925	10.2885646655386	0.319097	12.444408413112	0.292636	12.5493108949932	0.388031	3.71547381199169	0.384615	3.56223569291225
Hdc	chr2	-	NA	0.0169801604450194	NA	0.0230006058016188	0.952381	0.0564565161505152	NA	0.0663492461044313	NA	0.0894319869651057	NA	0.084340970716324	0.900709	0.34144710620942	0.842105	0.302609505347848	0.771429	0.204539938694411	0.798611	0.256131228874709
Helz2	chr2	-	NA	0.056459143941311	NA	0.0605444214343029	NA	0.169840351710028	NA	0.130853003262123	0.2	0.246848532233925	0.416667	0.275143063537654	0.212121	0.293567674286638	0.35	0.313327538350397	0.38255	0.545494169380104	0.347107	0.536103058956283
Hipk3	chr2	-	0.583524	5.86973280467846	0.535097	5.18691618451143	0.533679	4.96609400503538	0.552381	5.07016741453838	0.536188	4.0474492160492	0.498528	3.91050765743639	0.511364	4.69746933299412	0.517464	4.91773897090415	0.511905	4.01542370226436	0.517454	4.26722462635515
Hmcn2	chr2	+	0.639676	0.406904173148605	0.557692	0.412945995317542	0.676871	0.459247297166217	0.731707	0.441372514890754	0.675716	0.579040432256066	0.742588	0.621802103438653	0.674419	0.466055193608443	0.731343	0.4262800645223	0.620567	0.634343727038761	0.661972	0.572050948760348
Hnf4a	chr2	+	0.110553	1.2904329069552	0.106557	1.31894595143956	0.130346	1.18468977592337	0.109726	0.991639748590972	0.247379	0.926295538210856	0.181237	0.926575961134347	0.3	0.235889442211503	NA	0.298581067714882	0.916667	0.287589275598282	0.927273	0.316998138506296
Hnmt	chr2	-	NA	0.148935327983113	NA	0.124605034313066	NA	0.123796971425662	NA	0.15505465590308	NA	0.130440929894348	NA	0.137936442993678	NA	0.226688553849382	NA	0.191740018611705	0.5	0.338582587891099	NA	0.312788405432425
Hnrnpa3	chr2	+	0.67207	136.535505632917	0.589078	136.028048938938	0.60414	129.87927026464	0.607728	137.425421403244	0.592034	119.962878530477	0.618085	122.106529848521	0.66874	113.109774421431	0.614887	110.377563337673	0.603448	91.8444101465494	0.602294	101.334422752258
Hoxd1	chr2	+	0.272727	0.391196372480571	0.5	0.40118166391242	0.285714	0.477373542970487	0.7	0.441930751276931	0.368794	0.843876290537146	0.460317	0.85180568730548	0.363636	0.646098901868243	0.15	0.537381779874389	0.486111	0.701829037765087	0.4	0.708139739830375
Hoxd13	chr2	+	0.454545	0.68034064289005	0.347826	0.621419307248771	0.433333	0.881984866902927	0.490566	0.949019307825791	0.365385	0.734604852563044	0.477273	0.683809870427596	0.5625	0.943177761689813	0.454545	0.922077981167021	0.434783	0.65239409035572	0.333333	0.597412694325283
Hoxd4	chr2	+	NA	0.010514270700061	NA	0.00415397078433239	NA	0.0218489945777792	NA	0.0211462074667377	0.8	0.0410003562514395	NA	0.0379368108917624	NA	0.043529123664538	NA	0.0230114038618796	NA	0.0369404587380877	NA	0.035941454739525
Hoxd9	chr2	+	NA	0.355526084074252	0.217391	0.309587508005357	NA	0.21108420042465	NA	0.239316461057084	NA	0.123461746914447	NA	0.128516275099622	NA	0.0901150678111362	NA	0.0952775541921645	NA	0.0382375254072622	NA	0.033069728018764
Hrh3	chr2	-	NA	0.0246313334581848	NA	0.0194626603182007	NA	0.020473883030926	NA	0.0237783927318282	NA	0.0977961453626198	NA	0.135733230577774	NA	0.193750260227122	NA	0.156332719243469	0.428571	1.28077478617789	0.544304	1.07399880837036
Hsd17b12	chr2	-	0.50927	46.0562710594301	0.508369	47.35558448631	0.499566	55.76742096214	0.496535	58.12783365893	0.532089	45.3721150518734	0.504929	44.1319062953186	0.520569	46.1222170374389	0.487664	45.8404182086463	0.520507	55.6152495423289	0.515479	57.9739397962118
Hspa12b	chr2	+	NA	0.13458266496078	NA	0.159512478118364	0.65	0.461450765482697	NA	0.389090217387974	NA	0.274329656373268	NA	0.270385997628561	NA	0.191528144123967	NA	0.289943688659683	NA	0.188396339564247	NA	0.17251898274972
Hspa14	chr2	-	0.490951	22.0247344032635	0.494303	22.4222945575573	0.495689	19.830855685718	0.496299	20.6537046295661	0.494376	20.3639329730643	0.506954	20.228472653722	0.505702	18.723487360393	0.489592	19.1330955052265	0.523823	15.7075761737694	0.512956	15.4198786280263
Hspa5	chr2	+	0.488655	232.188342937649	0.48789	237.736786972948	0.478381	187.877376822664	0.498315	186.418580662207	0.49381	146.501010944467	0.465646	139.213545604533	0.493459	247.851809148529	0.498525	251.523731239063	0.476652	133.457155489273	0.489869	136.349280272559
Hypk	chr2	+	0.738095	0.449260961883128	0.796512	0.422272616283169	0.940741	0.375872252609138	0.839779	0.328348758092461	0.788177	0.364326773056558	0.679739	0.446903970065597	0.84	0.4072422503659	0.851064	0.411292875087964	0.542443	1.01359145598318	0.570156	0.825302117209472
Id1	chr2	+	0.19469	6.73362900516594	0.183784	7.8226002166457	0.222345	45.5540085059884	0.23885	43.6265656215304	0.248111	33.542108688225	0.215865	28.4414887587329	0.419831	50.4030665056407	0.371053	42.9394581430215	0.40099	8.42570465025816	0.40708	8.57589274362464
Idh3b	chr2	-	0.578891	36.9244533757855	0.5756	37.2422976072791	0.560843	35.589716171162	0.558211	34.2081271266237	0.534648	34.0720868174513	0.56388	33.7783067246125	0.548963	34.5371922544057	0.562046	34.1963448447739	0.556357	32.3725907387757	0.531022	32.7898239853521
Ier5l	chr2	-	0.52	3.58135732663873	0.555556	3.69704948061559	NA	2.42470907101924	0.65	3.29934431043455	0.333333	2.9814884480361	0.533333	3.60754609902374	NA	2.14032522593993	NA	1.5549808210833	NA	2.74483579699481	NA	2.86970792256456
Ift52	chr2	+	0.394266	36.1233642621887	0.399533	35.7718556616896	0.413014	27.9159597633733	0.425568	28.2505664180032	0.412378	31.4505801972141	0.421802	30.7878476915239	0.462496	32.0752394862069	0.457134	31.9698698576932	0.510802	28.0558631280479	0.52488	26.3228897892113
Il15ra	chr2	+	NA	0	NA	0.00826309438070978	NA	0.00869242051488437	NA	0.00280427438650215	NA	0.042014760027341	NA	0.0503093650512441	0.536585	0.313882577625563	0.6	0.297533414845707	0.34375	1.05018168070849	0.320755	1.03005582882378
Il1f9	chr2	+	0	0.883989861115077	0	0.772799885139585	0	0.781684903098218	0	0.748976085143488	0	0.673420899887114	0	0.653949589692468	0	1.15826296503367	0.0508475	1.11141729477559	0	1.77591031230088	0.0451613	1.51446511713116
Immp1l	chr2	+	0.536585	9.54224564082852	0.49635	9.61720356456431	0.560606	10.8587901554578	0.50173	11.0317217952025	0.52	9.86052128000588	0.566775	8.74048233182483	0.493088	10.3801234759123	0.574468	9.89150616537837	0.553488	8.60940907138339	0.510917	7.6923996450265
Inafm2	chr2	+	0.380952	1.90362369127373	0.47191	1.99351956059263	0.358491	1.28695086699407	0.384615	1.5232528211762	0.463768	1.93992252251324	0.631579	1.98146212407482	0.511111	1.42383578155047	0.428571	1.39430414877089	0.439394	1.9841430642052	0.418919	1.93193069456753
Ino80	chr2	-	0.467209	17.7715965203223	0.483521	16.4130780159971	0.481738	18.9587326234048	0.468254	18.0281915602729	0.41292	34.6440775909966	0.416432	35.0952807417165	0.444414	34.5873631472052	0.446029	34.6517307926288	0.43986	16.9501672306439	0.429139	16.3275888068654
Inpp5e	chr2	-	0.463415	2.18003050039371	0.49505	2.08131997037593	0.483146	1.68926814752966	0.513761	1.75958079072073	0.544444	1.69381708909109	0.43956	1.57671066444266	0.647059	1.61113421399794	0.488372	1.80201067735778	0.525	1.82619078562114	0.40625	1.82846916546994
Insm1	chr2	+	NA	0.0899885903916185	NA	0.0790058443368509	NA	0.232710117216543	NA	0.209137356117486	0.0769231	0.864869450320687	NA	0.619863014609533	0.238095	1.87828870695121	0.75	1.86006373539026	0.46875	1.73011234313685	0.47619	1.77731653088717
Itch	chr2	+	0.51756	9.55358322650745	0.451153	9.22258355521818	0.47	9.03967505968055	0.479526	9.30366046119118	0.508753	7.60531482074286	0.524723	7.60985309229759	0.488113	8.13175947578755	0.53747	8.03340220083408	0.475138	6.74669215413219	0.505648	7.259644901309
Itga6	chr2	+	0.663489	10.7327112270705	0.654874	10.7397612164606	0.581353	18.8729102225863	0.591737	18.8267292913364	0.541797	24.6632520825362	0.553601	24.1474842230028	0.582738	24.5930360562747	0.563432	24.7879785803982	0.554237	31.232715805486	0.55514	30.174952429551
Itga8	chr2	-	NA	0.084136997892996	NA	0.0947362424967532	0.416667	0.236033193867117	0.181818	0.172599891433718	0	0.195363803919047	0.4	0.180766226491313	NA	0.228589931784763	NA	0.25779768191843	NA	0.158887089830176	NA	0.218902928193697
Itgav	chr2	+	0.452688	9.32853615244711	0.471927	8.98154674916509	0.469095	7.37511266437209	0.457206	7.37345738299115	0.444698	6.12608822575957	0.469111	6.35441582437021	0.493916	5.26570925746818	0.456181	5.00226669060169	0.477968	5.46833626565122	0.514469	5.53248177670879
Itih5	chr2	+	NA	0.0294266487567529	NA	0.0403029813515834	NA	0.0163065407633654	NA	0.0142038272533541	NA	0.0417269448432371	NA	0.04247001968693	NA	0.0751263084309041	NA	0.0751366028629348	0.6	0.721982562006184	0.598901	0.740644698457715
Itpa	chr2	+	0.527	36.3489318363428	0.521926	38.7901389268536	0.51742	34.1774461505499	0.486351	34.7739309603043	0.50799	36.9049992201826	0.504481	35.8773619279979	0.491108	41.7068876654258	0.493028	42.5151453204158	0.487694	24.056020034159	0.507068	23.6296094285477
Itpka	chr2	+	0.613577	18.3367839992162	0.605923	18.2880277464551	0.708333	5.98050006566639	0.65942	5.56867809954869	0.593023	6.50944929977474	0.660606	6.78363599116485	0.616667	3.44102750684767	0.526316	3.47956982015103	0.514706	2.51585249676296	0.434783	2.62913432833887
Itpripl1	chr2	-	0.428934	1.52575625585219	0.378378	1.66751366745742	0.46402	1.50257487975751	0.458874	1.40421226627223	0.443843	2.09297056674015	0.531758	1.95834323961329	0.470588	2.49747473648006	0.479452	2.40916101314473	0.475107	2.67662677850835	0.52506	2.55109330430465
Ivd	chr2	+	0.497852	8.99195709863328	0.493603	9.20055707310961	0.485724	9.75347373339662	0.484605	8.95734141926372	0.480331	10.4511658327193	0.509318	10.6103161230901	0.506838	10.4634643260205	0.499206	10.4221009842166	0.525613	11.1274324618409	0.504065	10.8660698547773
Jag1	chr2	-	0.551456	6.54550612051844	0.577664	6.67461765061695	0.591304	3.44659321598909	0.582677	3.1196255566917	0.575058	3.38109750941594	0.630631	3.40763318482788	0.578059	2.96475016128397	0.555	2.86100819756646	0.512346	3.11170905232889	0.501742	3.0124042137374
Jmjd7	chr2	+	0.514821	0.221400500169855	0.481567	0.131206134345127	0.535597	0.203748562905519	0.46577	0.178111484605551	0.505607	0.173791305988244	0.52381	0.207491128959027	0.507886	0.163678388473288	0.507177	0.216318936813843	0.482436	0.527833922152492	0.465132	0.408444885652163
Jph2	chr2	-	NA	0.0327808026103428	NA	0.0201460261117469	NA	0.0423855090112388	NA	0.0175809220997254	NA	0.0619775067941853	NA	0.0836303845275515	NA	0.0980146965522769	NA	0.0996439755946256	0.75	0.297524792287576	0.659091	0.282215737677405
Katnbl1	chr2	+	0.514085	13.7649790108071	0.464789	13.7452811653783	0.445972	17.4931626225686	0.471729	17.9676720066414	0.506711	16.3343152191491	0.527241	15.8767847958394	0.508969	20.2495742552295	0.468354	19.2912704541382	0.486239	12.0365802268915	0.449857	13.5397638042049
Kbtbd4	chr2	+	0.489726	6.67516512777161	0.416092	7.32647697611148	0.469388	7.19415071900662	0.48497	7.08587518239605	0.472727	5.57280917388154	0.492958	4.89081511044232	0.448505	6.54087832114981	0.459227	6.57521358854152	0.552239	4.74856710871581	0.455598	4.91690703472617
Kcnb1	chr2	-	0.222222	0.2387841397201	0.302632	0.281417056951945	0.351852	0.239970733065333	0.5	0.223569603761494	0.475113	0.665713305263623	0.452489	0.630131485647854	0.558974	0.578060548149221	0.376344	0.600842417392544	0.437068	1.23707448145584	0.408571	1.0914046553825
Kcng1	chr2	-	0.454545	1.00730351785353	0.496403	1.18710312026544	0.442857	0.840141339329911	0.464286	0.755037815175705	0.512987	1.29185683273169	0.535714	1.25396812718716	0.56	1.00341968585798	0.56	1.08723778676871	0.571429	0.67036115971312	0.512195	0.608488864174897
Kcnip3	chr2	-	0.243243	0.603138418398421	0.4	0.766664157820372	0.235294	0.425046125989245	NA	0.37269803039289	0.4	0.44001961576559	0.3	0.444414868709479	NA	0.398071749067579	NA	0.406528312162281	0.341935	1.80425909507702	0.448598	1.86253632289776
Kcnq2	chr2	-	NA	0.278094157406246	0.75	0.273920588550675	0.60274	0.269945247725865	0.979592	0.261262283385639	0.592105	0.428098846641343	0.673575	0.447343376660635	0.572816	0.498769982646925	0.486486	0.532554278511086	0.461538	0.417419465583954	0.502994	0.405859632581299
Kcns1	chr2	-	NA	0.131436137637709	0.4	0.176102628693313	NA	0.223252897693125	NA	0.234460914469697	0.513514	0.259306087914709	0.5	0.314909102800648	0.5	0.266158441433334	0.857143	0.293912986125239	0.590361	0.426647315200499	0.568182	0.360303954092345
Kcnt1	chr2	+	NA	0.0538409469830893	NA	0.0502779586289361	NA	0.0949312247830408	NA	0.118128471735443	NA	0.0751896205811217	NA	0.0909780558073848	NA	0.0776778792754588	NA	0.0928401980842904	NA	0.193461992954313	0.466667	0.193342500815884
Kif16b	chr2	-	0.580392	3.11362180419731	0.618821	3.10623354678713	0.613861	3.85008855518693	0.614566	3.73752253227293	0.584005	4.54925369568722	0.578116	4.69508487375923	0.60107	3.84633111891155	0.572619	3.66282243526936	0.591708	5.10445318823263	0.5663	5.24143476382889
Kif18a	chr2	+	0.55302	6.22159725304407	0.526857	6.71332716143431	0.53366	7.11716153854908	0.524266	7.46647981031569	0.517764	6.15789321291453	0.524455	6.22101962561614	0.558296	5.92218774567611	0.528388	5.65945958545561	0.517707	5.20716380880694	0.53296	6.70543223944344
Kif3b	chr2	+	0.445946	4.74979706575577	0.44896	4.63540678357195	0.442977	4.28414930586191	0.453515	4.27025050048091	0.46678	5.0582288665751	0.442573	4.94731022265785	0.501987	4.74524997539081	0.488652	4.66797455301941	0.468987	8.71348721832513	0.458244	8.65151034007982
Kif5c	chr2	+	0.519868	2.39132380049043	0.588128	2.3250417757938	0.614679	3.24849945851423	0.59456	3.41284747525478	0.60111	3.0031871139671	0.571349	3.14606753780076	0.6	2.1336401521791	0.64457	2.20363028726946	0.511851	3.84628173519748	0.525358	3.86713009910379
Kin	chr2	+	0.545279	10.362322529944	0.530882	10.586783141138	0.525659	11.1066192307896	0.554913	12.0217417292709	0.550328	11.2265468141478	0.537598	11.0436392790462	0.573071	11.6940288642141	0.542714	11.8367692252107	0.598425	6.03583263226329	0.528541	6.40082526857967
Kiz	chr2	+	0.307937	5.85768575295749	0.278061	5.75202778018732	0.3	5.60979361959358	0.313783	5.54428681886726	0.347917	5.87993344358879	0.327519	5.88690041955702	0.322957	4.97832345204576	0.359307	4.52647850083091	0.190341	11.4075396035457	0.186176	11.6849662853167
Klhl23	chr2	+	0.451531	1.44438539501674	0.44062	1.655994580892	0.403548	1.28429321760442	0.4238	1.38474898386732	0.455497	1.06199663883932	0.485194	1.01980310001669	0.467192	1.32883587506923	0.4613	1.3946312450179	0.395133	2.52350586965921	0.420652	2.61990136029427
Knstrn	chr2	+	0.463379	8.87576491375003	0.451039	8.87935012835837	0.497345	8.83120264250007	0.474662	9.21428238699985	0.43476	8.99626351154597	0.45804	8.98833227115259	0.435004	9.32636791955725	0.454128	9.14716241290095	0.426185	12.4012049151582	0.440098	12.4917916314509
Lama5	chr2	-	0.448518	32.8088012000914	0.447836	30.85026287038	0.412188	30.1454929569994	0.414797	26.3566834938165	0.417554	27.7587389121332	0.434141	30.2476442753302	0.416631	28.9849877102499	0.427663	30.3908123125317	0.454103	49.0138190270968	0.445979	43.3200195215832
Lbp	chr2	+	NA	0.0384964645296374	NA	0.0380228913440651	NA	0.0666640819864347	NA	0.0361310815386959	NA	0.0386664506482215	NA	0.0484045751059457	NA	0.0199219400584337	NA	0.0421264449916091	NA	0.0901680582569924	0.25	0.116972782526317
Lcmt2	chr2	-	0.54927	3.42344653993985	0.485673	3.36671024128572	0.462665	3.53778920203401	0.468056	3.50959376083953	0.438849	2.86674490910065	0.448698	2.70717082523617	0.426667	2.98305084473079	0.527473	2.89575506197893	0.574405	2.00734452782769	0.493734	1.86608033007614
Ldlrad3	chr2	-	0.547542	6.80853405968132	0.509843	6.48791061567793	0.507635	5.11394019301232	0.521382	4.99705772350091	0.49127	5.11731824812504	0.480011	5.21604380469638	0.479898	6.90568985696516	0.46132	6.61425228522932	0.524333	10.3648008932928	0.491857	10.2618830594504
Lgr4	chr2	+	0.43949	10.7174548714106	0.513333	10.2853954487544	0.517915	16.7879772455904	0.51495	17.3138045292041	0.483544	19.7781983650256	0.510121	19.9989146842314	0.537594	22.0188602451525	0.531381	21.5681891515218	0.535503	25.1152177077432	0.497696	25.4344201557668
Lhx6	chr2	-	0.520446	1.11921293426135	0.571429	1.0321731276266	0.504333	2.06436394304998	0.504016	1.85784549603126	0.424419	1.08851892742635	0.495122	1.27590850933452	0.512605	0.477375428941657	0.5	0.592961494393858	0.552326	0.679919702559101	0.578313	0.732585666853135
Lime1	chr2	+	0.544818	0.0336328884806638	0.545741	0.0531506331259197	0.550781	0.0223648736164213	0.592701	0.0324682393812202	0.516129	0.0143074159835752	0.501706	0.017651155067695	0.55157	0.0417720887249537	0.483923	0.0147217054220532	0.474124	0.0295411437608189	0.622155	0.0204389291227083
Lin7c	chr2	+	0.524008	42.1542438710926	0.545442	43.5121061559858	0.539918	39.675137388938	0.527231	40.6437722203412	0.531159	33.6156488653087	0.518268	33.4674333282999	0.504084	42.5475472214165	0.499127	40.9674094539279	0.52511	38.8564641618084	0.506593	45.133061549116
Lmo2	chr2	+	0.288462	0.779910349167126	0.475	0.81978594250726	0.410853	1.10622488447318	0.393939	1.22605828045649	0.580952	0.877627200942631	0.657658	0.896541770973008	0.573333	0.910886100949684	0.625	0.884770417830654	0.613208	2.23105192103868	0.688172	2.43500682467989
Lnp	chr2	-	0.488593	4.67954651222018	0.54837	4.77582302422946	0.478357	4.49764107286164	0.46001	5.03261257299823	0.457534	3.56146813146926	0.497776	3.85180058185115	0.449503	3.63775844200497	0.500444	3.65162623527099	0.503017	3.71467910141723	0.538913	4.13219148571627
Lpcat4	chr2	+	0.566265	4.53467124329473	0.582022	4.45502845581354	0.518931	4.7275682686393	0.504298	4.27959688303029	0.543689	4.66692400814295	0.506261	4.858438227177	0.523438	5.61956669061567	0.512821	6.08568080290682	0.599569	10.7965000714567	0.545637	10.20061122397
Lpin3	chr2	+	NA	0.394373386875378	0.25	0.391179451250948	NA	0.512636323456854	0.272727	0.4455197936533	0.353571	1.03812813235236	0.352304	1.06789965992664	0.360563	1.56757282821007	0.432836	1.4920970519807	0.454472	4.79792958217945	0.377872	4.15586394688216
Lrp2	chr2	-	0.727453	1.5311512945104	0.748518	1.30297435691998	0.858297	7.51286201771098	0.850763	6.7262387486211	0.787545	10.8420349283805	0.80517	10.8908926744969	0.728111	17.0691244449334	0.72777	18.1241514954477	0.636127	16.6527868898925	0.636132	16.0707037145293
Lrp4	chr2	+	0.378613	1.76610319014015	0.378628	1.68579397288827	0.405104	1.54649779541669	0.444183	1.49437977325659	0.412229	1.74801099955918	0.538172	1.68612221874378	0.459638	1.78363319289856	0.538462	1.83253277546106	0.519411	3.19319739973761	0.53044	3.10123778792265
Lrrc57	chr2	-	0.557143	8.69198281537963	0.5	8.73215021332397	0.484848	8.12727656950938	0.375	8.08419796314733	0.447154	8.1016851237465	0.418367	8.18569740321206	0.448276	9.13306298394462	0.3625	8.65104790215052	0.452381	7.23721145454092	0.445545	7.46440337792911
Lrrc8a	chr2	+	0.366983	2.60099334113193	0.398086	2.85680951754247	0.404372	3.32520193356574	0.377465	2.83911690990325	0.41968	2.5302206851399	0.406639	2.28216159783324	0.3424	2.11490107148958	0.382003	2.25180581653422	0.398589	1.65259247458852	0.394366	1.57681498880927
Lrrn4	chr2	-	0.800447	8.46030013569654	0.817369	8.13207262092779	0.943634	7.29931681357697	0.919489	7.24911345150991	0.906949	3.62326163051079	0.88913	3.35800515380985	0.855482	4.21413472427808	0.868056	3.75252506572833	0.80479	4.69019531025067	0.785408	4.33518764548108
Lrsam1	chr2	-	0.471429	3.17491329495275	0.546154	2.89189030801505	0.481013	2.70412839247878	0.46875	2.38693622226487	0.511628	2.83618868635808	0.411215	2.7902616580014	0.428571	3.31097997254537	0.368421	3.40176979492398	0.427083	3.95809297012596	0.464286	3.72977682696373
Lsm14b	chr2	+	0.55283	17.8506067166684	0.506154	17.6871192352106	0.530055	20.5482148366907	0.538562	19.9002015580033	0.534529	26.3151968404294	0.5	27.7098232518318	0.514286	26.7507762881928	0.524658	27.09868909755	0.531825	40.5034822206427	0.506874	39.6050472567294
Ltk	chr2	-	0.515152	1.07373698329454	0.576923	1.05286169018182	0.454545	0.204308160983401	NA	0.253241426359033	NA	0.162039248802294	0.3	0.265916566495626	NA	0.116041328277668	NA	0.117970260477221	0.8	0.329519375880279	0.692308	0.311190373287312
Ly75	chr2	-	0.491519	18.9994013578056	0.501853	17.6869542742316	0.524357	10.1732741141606	0.51157	9.92729702611041	0.480331	8.48016810837521	0.47722	9.16876404654095	0.502232	3.30566343029021	0.522059	3.57854490507185	0.5	5.63033579036613	0.479339	5.47295617534001
Lypd6	chr2	+	0.475248	1.92842269925366	0.554475	1.70437788889192	0.566766	1.19528824142083	0.454118	1.2604886239583	0.504732	0.942931228780758	0.547486	0.995167294564817	0.711538	1.15281555239003	0.470833	1.06877449500087	0.532134	1.3798732418891	0.562617	1.50593635138706
Lypd6b	chr2	+	NA	0.0714195161838242	NA	0.0940545765914892	0.8	0.301771197921113	0.818182	0.339943962553605	0.583333	0.350234994031113	0.823529	0.32406544603547	0.798165	0.720712904083994	0.782051	0.696872617950831	0.723032	1.19188305002176	0.68323	1.06696861337345
Lzts3	chr2	-	0.452381	1.86617919240066	0.366667	1.8345818533864	0.420139	2.12380037849109	0.363229	1.8033159483229	0.472779	2.35163849543769	0.454965	2.57763321116504	0.474308	2.40305434591568	0.47032	2.45297127408661	0.394928	2.37227334250567	0.475645	2.16241178255528
Macrod2	chr2	+	0.533679	0.915628960248441	0.525773	0.908820138944712	0.506849	0.949791140310882	0.586156	1.16356493726599	0.526946	0.989227066468568	0.480795	1.1096185956409	0.566406	1.11106947984603	0.504831	1.064487272613	0.475758	0.853095958775759	0.485009	0.975358070544888
Madd	chr2	-	0.44898	2.55344028316081	0.485615	2.51899604613295	0.410185	2.68673859231742	0.411989	2.43839836782792	0.413021	1.94220573778005	0.463983	1.92800501261543	0.440945	2.06552542618834	0.451202	2.12039221638666	0.38189	1.93716033955162	0.455621	1.90987688305946
Mafb	chr2	-	NA	0.00460839578111503	NA	0.00728272725079506	NA	0.00383055819299989	NA	0.00741469159820908	NA	0.0294061431098638	NA	0.0302321299999772	NA	0.214636245366399	NA	0.176502873213555	0.25	0.518111078726768	0.142857	0.462091186160499
Mal	chr2	-	0.412371	3.30267700757336	0.480932	3.43396712543307	NA	0.403437201823651	0.272727	0.417388684226831	NA	0.110751142300505	NA	0.153713730524722	NA	0.115482232328166	NA	0.0610489728085143	NA	0.0392010339668404	NA	0.0678060370031965
Mall	chr2	-	NA	0.301307759453492	0.111111	0.40901081427627	0.277778	0.62933817841463	0.265152	0.609095106876411	0.148649	0.482030110585219	0.025641	0.537242733705477	0.265306	0.639700182268484	0.0909091	0.701710162330528	0.2	0.393583461918818	NA	0.287571453419401
Mamdc4	chr2	-	0.525896	0.512138090025734	0.556772	0.454923501084329	0.553498	0.239279995564372	0.523256	0.231583398990371	0.482663	0.329880188137932	0.535311	0.375500684567535	0.488432	0.245977154858993	0.505319	0.326001514797467	0.549844	0.35868946079659	0.491892	0.37886623175536
Man1b1	chr2	+	0.479914	14.4832313837695	0.470612	14.0608713316623	0.448937	12.3230080256304	0.469901	11.8248713513583	0.479256	14.4082446513638	0.446896	14.7932592027779	0.469	14.9961101158832	0.471465	15.1064850883097	0.496365	20.5640290970804	0.468595	19.2807003912539
Manbal	chr2	+	0.660313	20.3280459234545	0.637951	20.0005400333867	0.668686	13.3941955291061	0.671827	12.7155832234658	0.663712	13.5490066159906	0.593504	12.8580771875242	0.574116	13.9828953910739	0.610427	15.2129076907695	0.572547	18.3099371436162	0.596338	17.8347104461954
Map1a	chr2	+	0.471983	2.74648721729694	0.469628	2.55466949726071	0.51881	2.83140844163889	0.50951	2.48515736575639	0.524073	5.17612815793489	0.505038	4.92307922030115	0.536713	8.3406287668287	0.524312	8.54940232575842	0.419113	3.67559234446628	0.43961	3.41785397443447
Map1lc3a	chr2	+	0.325926	10.1308069679754	0.398406	10.7838629187979	0.378995	11.2678058600843	0.353846	11.7499286753755	0.394231	12.058062435309	0.421875	12.6205908193419	0.341935	9.04569098973291	0.27957	10.5260318422256	0.351648	14.3848210737864	0.324484	15.042498027597
Mapk8ip1	chr2	-	0.383607	3.61420583933607	0.447154	3.78135853160031	0.427835	4.16090671933419	0.472554	3.93847294447546	0.415929	5.77087960044486	0.474648	5.56955516182526	0.48419	6.25523536379462	0.466042	6.33238752293711	0.474328	8.45948436774928	0.474576	7.68883994160301
Mapkap1	chr2	+	0.554241	8.50311011862003	0.537709	8.56519506558501	0.611852	8.19139530699541	0.59697	8.37330216615699	0.562743	8.23498064452415	0.606236	8.01542474027482	0.615385	6.71416088632161	0.585185	6.69769047742475	0.624348	8.00521764976102	0.607477	7.84274793405634
Mapkbp1	chr2	+	0.442188	3.41063033159865	0.456885	3.25039669313852	0.467099	2.45787130047809	0.48269	2.37059246520099	0.483139	2.9165395822721	0.463217	2.98684355626515	0.449353	2.65437829619326	0.47587	2.65885180964373	0.461255	5.63959131320463	0.432546	5.06057536253385
Mapre1	chr2	+	0.494715	37.8036181131145	0.507385	37.7599081976986	0.490758	37.8367276882053	0.499757	39.1703889713757	0.47405	33.2836178399216	0.507127	32.247989153506	0.491103	35.0915065444491	0.509674	34.954481551563	0.528826	24.0184725077439	0.518739	23.6451222589143
March7	chr2	+	0.524781	17.9753938950338	0.52492	17.9475411921774	0.527325	15.8910229245314	0.500833	17.3740545468373	0.5008	14.7642949694289	0.516153	15.8019540854322	0.528049	14.3254425573234	0.541507	13.9383423807712	0.521368	13.7370122361386	0.497713	15.8606247350924
Mastl	chr2	-	0.498612	9.70605689337329	0.464311	9.6809853069745	0.498531	8.32646915980976	0.510778	8.93270563177537	0.51784	9.35043748606482	0.522043	9.43141821784316	0.555329	9.2211253169014	0.521008	9.58204894672218	0.52913	10.7637475709699	0.532673	12.4493987838186
Mavs	chr2	+	0.4634	19.9968666999452	0.451289	19.9485623610411	0.399631	15.7050755916512	0.479899	15.1440021933228	0.44586	14.0726460438125	0.454848	14.0758384132297	0.447991	9.66744748995234	0.46201	9.85622799169598	0.45332	9.83604042204171	0.453448	9.51680534060827
Mbd5	chr2	+	0.461538	0.858896805874907	0.538462	0.818389797490933	0.548387	0.792667990082255	0.46124	0.748754116977186	0.566879	0.753360661668157	0.468571	0.763358510604865	0.538043	0.719011013749815	0.528796	0.758473781548912	0.543307	0.602552659438277	0.45933	0.594877780627676
Mcm10	chr2	-	0.450137	28.8059550916523	0.457606	29.2806423299169	0.499128	24.2319393215101	0.495664	23.7312944913795	0.492394	31.1072240083204	0.482251	31.0153650169208	0.525435	33.6950220090011	0.535345	33.4932808086979	0.500479	28.4568317009054	0.505039	27.6933778630603
Mcm8	chr2	+	0.433805	11.3213187445651	0.434405	11.4323666709111	0.446645	10.6820122342737	0.424008	11.3712541960246	0.426323	12.1170498787202	0.458349	12.3328307123872	0.452019	11.4414627355174	0.435915	11.0523500424302	0.517134	14.8830157390708	0.535298	16.0221853856591
Mcts2	chr2	+	0.537129	23.4414117355411	0.522538	25.2129446965497	0.517442	32.5917425420895	0.54803	33.2837339171289	0.520343	38.212689717563	0.538688	37.1535832976481	0.491947	38.8155176817646	0.525984	38.5239257121544	0.569355	30.1198280286535	0.524106	28.6810108748474
Mdk	chr2	-	0.492662	61.1376411382936	0.52657	63.3938359880214	0.465195	65.8702960458512	0.504839	60.5780835594605	0.494577	83.3485217970539	0.49503	84.8919237926437	0.480057	90.5608787583891	0.477314	87.2692023070971	0.526205	105.209453706446	0.517575	103.056662080469
Med22	chr2	-	0.563743	15.0048767312127	0.578098	15.3226304244998	0.572711	15.4949587248744	0.563448	14.2996810343942	0.567277	15.9196646123741	0.574904	15.4615913096795	0.561867	19.6844322031392	0.564334	19.6670904461113	0.552311	11.4392202046542	0.542895	10.6391921661607
Med27	chr2	+	0.456954	5.62798733664399	0.542254	5.73448764408714	0.512397	5.12173173390488	0.486339	4.71591858333247	0.538206	5.48740840507936	0.483384	5.62720956628216	0.552083	5.74743556962941	0.489933	5.61556117590362	0.327354	6.51840063030264	0.412639	6.51951204809318
Meis2	chr2	-	0.712963	0.976750691191929	0.594203	1.04125281185294	0.57622	2.18963682343777	0.612069	2.04052491331295	0.495283	1.31933787739001	0.617424	1.29842617791333	0.55	0.755206620767809	0.469136	0.737916468870844	NA	0.0666894447939994	NA	0.0713622927635671
Mertk	chr2	+	0.4	0.514694889693759	0.5	0.499890530300162	0.047619	0.606079822284124	0.395833	0.595211118988569	0.391667	1.07954997059833	0.547945	1.19115986670851	0.363636	1.16160317576108	0.305882	1.28681829534168	0.523256	2.92280730417005	0.503132	2.98121767661407
Metap1d	chr2	+	0.583691	2.86595798434551	0.551862	2.87996067129162	0.506329	2.73146238689495	0.554509	2.66283932131244	0.522989	2.68587125461821	0.561298	2.72272082049277	0.596491	3.59912072903882	0.539493	3.48009824236657	0.597285	3.57040891856569	0.563902	3.7080370986594
Mettl15	chr2	-	0.470882	4.89124797298326	0.44507	5.01140148001287	0.442341	4.34879314810947	0.481591	4.53773259241219	0.491857	3.95571437113888	0.451128	3.86571934106742	0.405204	2.99657357358789	0.397394	3.0415108112755	0.412548	3.65594442922463	0.379377	3.56548359004594
Mettl5	chr2	-	0.654512	9.02409178574957	0.676628	8.73343635859839	0.658167	8.46829374612226	0.669841	8.820063176938	0.633871	10.9520245833862	0.622906	11.5104362803036	0.644654	10.3930739389141	0.64191	9.68015259042739	0.588326	13.7298605386024	0.586019	13.6133835479065
Mettl5os	chr2	+	NA	0.464708696008691	NA	0.477351653189669	1	0.714602978280614	0.916667	0.523386071704468	NA	0.411847656498717	1	0.503018224178032	NA	0.480973975123905	NA	0.584807056765699	NA	0.163269074002823	NA	0.176504095572414
Mettl8	chr2	-	0.502179	4.32748135298033	0.487398	4.35195939827623	0.463804	4.42148034141448	0.508567	4.34612399868747	0.500671	4.24870406028949	0.500562	4.7236687100574	0.507576	3.33483744151851	0.497481	3.52285094724536	0.510599	2.10490946977338	0.523198	2.23292195000634
Mfap1a	chr2	-	0.414334	5.42320472426541	0.464905	5.5862100393725	0.456578	5.33637178802262	0.488605	5.41419879716874	0.476391	5.3029731855959	0.47524	5.57517493194863	0.519467	5.58245457475666	0.517197	5.2841594276409	0.425665	3.47285629756534	0.390438	3.85042549281458
Mfap1b	chr2	-	0.519651	5.63774444364703	0.510417	5.73321113707957	0.537634	5.82034859650389	0.556604	5.71101071995193	0.52669	6.25883487072093	0.642857	6.50788952006886	0.525346	6.3932914855182	0.502674	6.79990406397523	0.49635	4.13397465345926	0.683908	4.11103343458486
Mga	chr2	+	0.43575	27.5731663327574	0.451691	26.2975639662584	0.474534	31.3522053689043	0.466031	31.5986493412401	0.485267	33.7307311561875	0.486673	35.5946703361462	0.477345	33.7676197848014	0.492462	34.2416349871102	0.470937	31.3630165793296	0.471761	34.5279866120504
Mgme1	chr2	+	0.592431	15.0258726548968	0.622353	14.6599733380601	0.591584	15.7910436682654	0.606472	15.9236348781761	0.540848	17.2074625380668	0.548321	16.8145282769595	0.590244	20.8027996265232	0.536451	19.9582002108867	0.603081	16.8896565928522	0.602851	16.6043222911705
Mir7005	chr2	-	0.849057	0	0.918033	0	0.885714	0	0.931034	0	0.904762	0	0.891304	0	0.857143	0	0.971429	0	0.908257	0	0.907692	0
Mkks	chr2	-	0.491429	14.2493554013874	0.473263	14.6480311951465	0.474744	13.2254787554178	0.481754	12.9159803261683	0.468632	11.2128287574978	0.489802	11.1469095440331	0.470121	12.9188760151607	0.450933	12.2084589380647	0.450882	8.01905012225507	0.406331	8.12459783390528
Mllt10	chr2	+	0.539552	26.399395342752	0.505875	24.8877772127821	0.530719	23.5355253860519	0.535853	23.2808324469182	0.547095	22.1547684292948	0.53981	22.0019630900083	0.548402	21.417179971069	0.528107	21.5330175802505	0.498038	25.1096061205621	0.498421	25.9332952681456
Mmadhc	chr2	-	0.456963	38.560220312883	0.46592	40.7304185371978	0.465433	36.2390985930974	0.474374	38.6985265881295	0.473192	34.2367646795196	0.487235	34.3113188449095	0.441438	34.9191408888043	0.465013	33.6575063381201	0.465674	34.166711320664	0.482317	33.8380896715578
Mmp24	chr2	+	NA	0.125758131636091	NA	0.151668276871298	NA	0.176053534271995	NA	0.17571536597857	NA	0.244023474149076	0.25	0.221447931355374	NA	0.219216496370801	NA	0.239017874578165	NA	0.232544250181257	NA	0.226255410147597
Mmp9	chr2	+	NA	0.166410096200004	NA	0.079586277214149	NA	0.32032515226594	NA	0.218424369366513	NA	0.217340119603562	0.333333	0.310269300494821	0.363636	0.530301328690229	0.627451	0.575057518379382	0.8	0.246172302593688	0.2	0.186289374903102
Mocs3	chr2	+	0.532338	5.90700574198742	0.485714	6.10743607615636	0.4677	5.19073640467898	0.494781	6.46455317415282	0.52	4.33286278755709	0.515152	4.64294265200816	0.557994	4.40645782166608	0.492366	4.25489371508952	0.570621	2.46309355248848	0.419214	2.33905052431554
Mpped2	chr2	+	0.688679	1.72401498964381	0.596899	1.68761096983475	0.658385	3.47912544900124	0.696429	3.58927143575916	0.819209	1.81584293111485	0.75	1.94732696328729	0.729167	1.2410883937668	0.754098	1.31218751277209	0.684211	0.627966227476696	0.619048	0.7184000127031
Mrc1	chr2	+	1	0.386781912869328	1	0.405569948051595	0.866667	0.463038187019373	0.864486	0.473584766789834	1	0.388058622188322	1	0.392575430618759	0.981982	0.422979279206438	0.987421	0.4818163931821	0.974576	0.358956195190321	0.993671	0.376966869821804
Mrgbp	chr2	+	0.527273	6.84765993952036	0.602719	7.26914732683169	0.518182	8.02972468415859	0.529801	8.84754419528174	0.510336	7.61849660568331	0.488865	7.63328968076389	0.541379	8.07296053899489	0.542609	8.20100390436677	0.500568	10.2823645486985	0.5	9.83143450026148
Mrpl41	chr2	-	0.673077	16.0216172758051	0.644022	17.9689362066352	0.648383	17.6404451789632	0.615922	17.5223190260596	0.614152	16.1727936782987	0.642336	16.4069871645451	0.654545	19.6893304692755	0.673546	19.9578579451402	0.674548	18.2113965601831	0.665409	18.1365113772097
Mrps2	chr2	+	0.545804	42.3421819869207	0.534052	42.367729840174	0.567827	43.7305223758507	0.521134	42.3836993223233	0.555433	37.1201128752241	0.562699	35.4819782132836	0.570983	34.5318223125324	0.552472	34.4707597690771	0.51752	35.0317038526652	0.52638	33.4551449927956
Mrps26	chr2	+	0.427419	9.94320924581093	0.410596	10.45594670732	0.346405	11.1558740303679	0.44403	10.5767487611451	0.436486	10.5594639400908	0.448598	10.510011303823	0.346535	9.02875229890951	0.282051	8.87274956249382	0.243478	6.96870565152874	0.457944	7.14527703006621
Mrps5	chr2	+	0.584815	18.730522703637	0.601035	19.0800074922924	0.565526	16.7636593581912	0.563878	17.2403685737377	0.572417	15.9960477762685	0.592853	15.8193848494811	0.560847	16.1502147692523	0.576369	16.1782098137638	0.564039	15.8454491650126	0.562348	15.2753186068552
Mrrf	chr2	+	0.888889	3.4169878038687	0.959016	3.320756611495	0.993464	4.26554963110733	0.959732	4.04557789716612	0.944954	4.62202929773318	0.95614	4.42802180961947	0.964789	4.5110830686772	0.967391	4.46587420677584	0.95122	3.41477793785892	0.900552	3.3914067161822
Msrb2	chr2	+	0.813423	13.1570101153952	0.82666	13.0107191656107	0.851585	9.84171379638176	0.839972	10.2313859348577	0.834302	6.59126133817622	0.84584	6.88879589151768	0.881598	6.32533170967143	0.830725	5.89945884207141	0.855098	4.10255047470509	0.862025	4.71083919335415
Mtch2	chr2	+	0.521709	18.6779616303483	0.546929	18.996299215198	0.477193	17.5585911512126	0.484769	19.2847115558076	0.492731	18.621521519417	0.478804	18.4635822247613	0.534801	18.8178093546534	0.518634	18.5754421442948	0.420252	22.8238843351432	0.430725	22.1617502918416
Mtg2	chr2	+	0.455902	5.6167025526365	0.448958	5.60524486300773	0.44898	5.68426439872734	0.428767	5.76130324132563	0.493132	5.33243093586128	0.472661	5.39030492790416	0.548729	5.22549239408317	0.522892	5.38515975402282	0.555	4.2926812520411	0.491272	4.52191981074866
Mtx2	chr2	+	0.540116	16.8559580795983	0.531679	16.2845556455781	0.507227	17.1972550471308	0.525424	20.0299086687843	0.534287	16.367029831908	0.533171	15.423507252621	0.521624	14.822714860141	0.531062	14.227440686871	0.580553	11.4049168161932	0.515378	11.7215673458923
Mvb12b	chr2	-	0.586375	0.952115867908117	0.561489	0.9596665739006	0.489796	0.336018089726275	0.420561	0.427907696684198	0.438298	0.44500466746214	0.600775	0.431527426306619	0.430233	0.255076879966037	0.561644	0.263869011770269	0.481675	1.24430095835068	0.491071	1.18657558824998
Mybl2	chr2	+	0.586672	139.646262368577	0.580617	138.617732446419	0.614363	153.846227404749	0.607516	141.608627883606	0.621135	174.134744487515	0.626099	175.458700432705	0.639528	146.975418832289	0.641899	149.178321007122	0.668687	164.664355753362	0.66502	150.408490896203
Mybpc3	chr2	+	0.666667	0.647767977917088	0.762821	0.705985445431385	1	0.380616518370457	1	0.320455205307609	1	0.295620152112228	0.90566	0.341914279283912	NA	0.154124257222025	NA	0.183322894326024	NA	0.140605342045248	NA	0.113118646886188
[truncated: 13,493 more rows]
