# Supplementary material for: Kinetics of Xist -induced gene silencing can be predicted from combinations of epigenetic and genomic features
Source: HighWire-hosted journal article supplement (doi:10.1101/gr.245027.118), 2019-06-07
Supplement: Supplemental_Code.zip [file GSE121144_mRNAseq_undifferenciated.xlsx]

## Sheet: Undifferenciated
Genes	Chromosomes	Strand	B144T1	B144T1_RPKM	B144T7	B144T7_RPKM	B144T2	B144T2_RPKM	B144T8	B144T8_RPKM	B144T3	B144T3_RPKM	B144T9	B144T9_RPKM	B144T4	B144T4_RPKM	B144T10	B144T10_RPKM	B144T5	B144T5_RPKM	B144T11	B144T11_RPKM	B144T6	B144T6_RPKM	B144T12	B144T12_RPKM
1500015O10Rik	chr1	+	NA	0.347067288010589	NA	0.143906063205853	NA	0.420598665469949	NA	0.210063785155115	NA	0.225748887692846	NA	0.240328590106935	0.5	0.400186045962867	NA	0.15656567319989	NA	0.277034466249594	NA	0.180023190636162	NA	0.208155034149195	NA	0.0593727859838629
1700019A02Rik	chr1	-	0.253968	3.12248890197944	0.362069	3.50819645977511	0.4	2.79007167680745	0.25	3.47028450933908	0.553571	3.06991923686591	0.461538	3.77568484085118	0.322581	2.72331816837287	0.54	3.28973293924844	0.465517	2.64939145188356	0.696429	3.215145390631	0.395833	2.20699701329494	0.32	4.34223672627927
1700019D03Rik	chr1	-	0.896552	8.20232217320342	0.872881	8.21387891667438	0.906593	3.53804285519962	0.868146	10.6940864484792	0.919877	7.05400104037923	0.879032	7.91342288842919	0.940032	7.00835812066446	0.842837	8.01672653815811	0.937847	7.06537515319906	0.895161	7.59546912368812	0.888575	6.58518560967302	0.91194	9.10298618399054
1700025G04Rik	chr1	-	0.412055	1.87227315166961	0.453513	2.19495404561091	0.435655	1.60917881003518	0.448517	2.05125962030648	0.419595	1.76811367958694	0.438095	2.24843284752301	0.381084	1.64934452518103	0.450272	2.21034125960743	0.399167	1.70696464827069	0.454604	2.23156673808268	0.402174	1.79027455940018	0.467931	2.37756410878825
1700034H15Rik	chr1	-	NA	0.205315424683096	NA	0.352347144026164	NA	0.162914293474841	NA	0.394311717490077	NA	0.128777279902363	NA	0.383863747070949	NA	0.161227432779947	NA	0.342693738473396	NA	0.230220726658873	0.6	0.374786635710126	NA	0.176498904837092	NA	0.269278639781652
1700066M21Rik	chr1	+	0.507772	4.17083687856484	0.502994	4.46721193713558	0.504032	1.70325898075274	0.540865	4.02789003884587	0.559719	4.03744084865654	0.495763	4.50305202231153	0.530572	4.00156186107601	0.511294	4.41346775381112	0.518851	3.91002942719118	0.531073	4.59863686322668	0.571154	4.18653930444894	0.477876	4.62978034325562
2310035C23Rik	chr1	+	0.484709	5.44550401558551	0.508651	5.80091568296638	0.529412	1.6087993826105	0.512148	6.85341008352781	0.476969	4.92988044639556	0.469461	5.71072674799869	0.503012	4.31851148152172	0.523567	5.73064973165671	0.492784	5.16053415967614	0.497817	5.28691231653688	0.515964	4.70904824581332	0.468189	5.66171804072912
2810025M15Rik	chr1	+	0.561215	43.8387583602533	0.555216	39.8104273438499	0.516141	91.0845117652458	0.559486	38.8051643984733	0.528118	46.3882400534531	0.551666	39.767961537241	0.537346	51.156969405528	0.545306	40.5438025739052	0.538735	43.6898042370915	0.557159	40.5376476026554	0.57251	49.0473295713579	0.579431	40.7164249435322
2810408I11Rik	chr1	-	0.514286	1.57129117982923	0.551402	1.016542758884	0.586957	2.97879779813272	0.457143	1.13314202432242	0.532258	1.41035539606581	0.488722	1.35195867955414	0.587983	1.82905813651292	0.468254	1.24873998743461	0.556818	1.55031329732767	0.533708	1.48865626488073	0.568862	1.38484302343348	0.517241	0.960819574631637
2810459M11Rik	chr1	+	NA	0.272548367450645	NA	0.216490324913571	0.727273	0.319987130691194	NA	0.245034799338502	0.7	0.27508698143058	NA	0.268991015173426	0.714286	0.280257414770214	NA	0.27557626597747	NA	0.182186666615399	NA	0.239992119461571	NA	0.161583131282111	NA	0.176852831741786
2900009J06Rik	chr1	-	0.818182	0.373425082050359	NA	0.229385056791127	1	0.610570854522029	NA	0.231812245554261	NA	0.346990338027175	NA	0.25858018482281	0.8	0.692883991008306	NA	0.140379957481412	0.8	0.260223040246944	NA	0.223494152253306	0.692308	0.348387246022005	NA	0.248429271505706
3110045C21Rik	chr1	+	NA	0.372355803181052	NA	0.495577825888936	NA	0.525258648054478	NA	0.603554327879766	1	0.58947595016687	NA	0.623908547756024	NA	0.438666642513754	0.826087	0.721664295958187	NA	0.356454500144432	NA	0.583272697495926	NA	0.264677837254729	NA	0.629124851188774
3830432H09Rik	chr1	-	NA	0.27304732487932	0.309524	0.432075938647564	0	0.239780050722977	NA	0.35374003644685	0.173913	0.28681201116922	NA	0.438430313793868	NA	0.292652366644794	0.117647	0.358812661894658	NA	0.203059555141503	NA	0.374204151522758	NA	0.337015919529332	0.222222	0.440023567467309
4631405K08Rik	chr1	-	0.2	0.13340398882907	0.411765	0.232181773274258	0.538462	0.162522996230699	0.615385	0.234638554892813	0.2	0.158393750814251	0.454545	0.342134451193901	0.466667	0.135551523470899	0.5	0.254093040463987	NA	0.118316803294097	0.48	0.260225830054196	0.454545	0.106679455001462	NA	0.228214146125473
4732440D04Rik	chr1	-	NA	0.098045869461208	0.7	0.27633546174598	NA	0.0199694702733916	0.25	0.322222437860519	NA	0.0991439016983504	NA	0.247607517928155	NA	0.0710873517725058	0.0454545	0.267978821560592	NA	0.092072619217809	0.446809	0.266937623754931	NA	0.0922406488836029	0.4	0.295988870435396
4833412K13Rik	chr1	-	NA	0.296333043475167	NA	0.195031581416391	NA	0.036644450521964	NA	0.285788136063218	NA	0.245853251109518	NA	0.185654783739132	NA	0.117823072169431	NA	0.200518389570812	NA	0.193091925862752	0.727273	0.312482132641145	NA	0.211579716928751	NA	0.253468404801968
4930535G08Rik	chr1	+	NA	0.110489891924312	0.75	0.475096932330329	NA	0.25504537563287	NA	0.102883728982759	NA	0.273782180435559	NA	0.0680082786749664	NA	0.292874493678301	NA	0.431973902103978	NA	0.167989975500594	NA	0.23512169115485	NA	0.294518965964821	NA	0.378030020876078
4930558J18Rik	chr1	-	0.760331	1.3272786724826	0.678571	1.3916529816067	0.350877	0.607472842790278	0.684564	1.47030475264103	0.68	1.19079237835642	0.587629	1.54236611541728	0.808511	0.982670998525878	0.760956	1.60354684569824	0.768212	1.0843894820427	0.827004	1.47309124849393	0.695652	1.15898667162082	0.607143	1.74860377590096
4930590L20Rik	chr1	-	NA	0.283051260203934	NA	0.104322498703379	NA	0.065337121545491	0.8	0.342635685732213	NA	0.263014074785517	NA	0.0522667602836541	NA	0.202575938213291	NA	0.153224850516782	0.833333	0.258212439738707	NA	0.135524482921534	NA	0.362157137171932	NA	0.193686267477195
5033404E19Rik	chr1	+	0.761905	0.74956757666963	1	0.365643011300504	0.922078	1.01778671027201	NA	0.20528443576372	0.736842	0.7921045478564	NA	0.244255085381922	0.836207	0.864873504805874	0.867347	0.702796110140274	0.847826	0.815632079797485	0.916667	0.36358313156868	0.729927	0.904989029220543	0.645161	0.636951991356146
5730419F03Rik	chr1	-	0.127413	1.51140172429927	0.226277	1.95794181003382	0.0909091	1.07945232476866	0.263039	2.09013311747956	0.24183	1.33488443615808	0.21957	1.83755638245816	0.153226	1.42797315273359	0.20197	1.88341320201424	0.138587	1.29686333859206	0.210084	1.70763871653155	0.193252	1.38214146671111	0.239075	2.01383105448644
5730559C18Rik	chr1	-	0.585859	1.86184828934143	0.649789	1.31562262253705	0.5375	1.90566604507682	0.57931	1.7424635300057	0.60199	1.92876988176046	0.587814	1.46346928794232	0.596708	1.98324344448321	0.617647	1.35064868233311	0.532009	2.07048122975667	0.631579	1.38536138097569	0.516355	2.08491851885786	0.609626	1.31634926229871
6030407O03Rik	chr1	-	NA	0.198703839216873	0.818182	0.490202535625142	NA	0.0739791732486825	NA	0.220836286957941	NA	0.107208931220927	NA	0.313654069851273	NA	0.0764567934970994	0.619048	0.462644511797872	NA	0.0536004050959102	0.698529	0.557535439329875	NA	0.0768860936947476	NA	0.431299607492386
9230116N13Rik	chr1	-	0.5	0.170091015013047	NA	0.112519474082134	0.666667	0.156042668522479	NA	0.117771148854138	NA	0.14589256619755	NA	0.10872039534623	NA	0.124853155566397	0.4	0.133785345937426	0.511628	0.169089937725243	0.583333	0.132251856789873	NA	0.177868447681457	NA	0.0795828036889672
9330185C12Rik	chr1	-	0.9	0.356801682709003	1	0.428818199576079	1	0.304377740163113	1	0.447800835595588	1	0.418033371391014	1	0.486977020244432	1	0.530454050740431	1	0.475872751803193	0.985915	0.625037033060932	1	0.557074125784999	1	0.43418925854576	1	0.67230314251169
9430016H08Rik	chr1	+	0.4819	4.06319401365481	0.540741	3.57177763450658	0.521024	4.60700934775609	0.584245	3.62622265560793	0.550107	4.09496021178566	0.476923	3.44325362439627	0.484848	4.4397735983157	0.466667	3.47408854715118	0.485893	3.85314656190989	0.421488	3.51671525398451	0.557596	3.90701203802597	0.492669	3.35138952881697
9430037O13Rik	chr1	-	0.402597	0.96276741144366	NA	0.729714144576238	0.414414	0.967806112892586	0.270833	1.11338294674629	NA	0.750320707790905	0.323077	0.702516073118143	0.409091	0.802644631732446	0.369565	0.798578127172532	0.568182	0.731900769583441	0.279412	0.681543840618133	0.178571	0.807151432021646	0.0869565	0.796938288057208
9830004L10Rik	chr1	+	NA	0.0268370933378098	NA	0.0618199118977373	NA	0.0154871102506029	NA	0.0749688552381867	NA	0.0436402693311074	NA	0.105306432367474	NA	0.0320115713193171	NA	0.133171419587596	NA	0.056104667485732	NA	0.117787602459165	NA	0.0697478477049137	0.8	0.145382312643441
A130010J15Rik	chr1	+	0.788601	2.38186060454598	0.762029	1.74590916252113	0.776344	1.1078225775559	0.806015	1.70148766721808	0.727101	2.408146833223	0.781278	2.2220851671309	0.784463	2.37465805685109	0.742718	2.14575690902555	0.794649	2.37553391996496	0.760285	2.20993964056019	0.746119	2.03263572070316	0.759375	1.98258987782499
A630095N17Rik	chr1	-	NA	0.334519708408425	NA	0.179800709029733	NA	0.386088280120996	NA	0.233618440699942	NA	0.466258610937673	NA	0.21877106563964	NA	0.432270234436138	NA	0.264084326068772	0.1	0.328475501219995	NA	0.177963880215158	0.636364	0.523866103753099	NA	0.174858053586194
A830018L16Rik	chr1	+	0.75	0.221589405380168	0.617647	0.364373279256471	NA	0.078691992191346	0.53125	0.312677055758157	NA	0.191648271655486	0.769231	0.374552836108725	NA	0.18705313137572	0.617647	0.298346009168053	0.475	0.247496937479776	0.641975	0.273402897567558	0.806452	0.219453993750876	0.64557	0.414064244797838
AA986860	chr1	+	0.378277	1.28146014763866	0.448485	0.78056300351956	0.567347	1.05217895350373	0.32567	1.17722728355272	0.413699	1.35057727402363	0.259669	0.809933758395548	0.426667	1.25497525141409	0.552846	0.880699116768412	0.376744	1.41222342041708	0.353774	0.813277209532016	0.376543	1.65747830159048	0.306452	0.755252285297292
Aamp	chr1	-	0.483048	56.3100114327973	0.482712	50.3080467456742	0.494705	97.6478491556022	0.493827	50.9330987986074	0.490112	62.0609395148509	0.472759	50.5769780397467	0.492436	68.1390549527284	0.474196	50.6243739924008	0.482554	59.8990572105266	0.490862	51.6141152431844	0.477202	59.9392513562718	0.500848	42.0680169028547
Abcb6	chr1	-	0.46395	0.150195572747536	0.511811	0.113969630991753	0.474462	0.0917731478641323	0.486091	0.145340608048707	0.512626	0.0930421568037119	0.493894	0.125076373292154	0.496614	0.119436587967585	0.431912	0.0903397190158836	0.479036	0.118657077395763	0.546326	0.122205770802498	0.422611	0.117752173598353	0.418838	0.137706138053008
Abi2	chr1	+	0.543062	6.5978576163044	0.498771	6.41360202603	0.648352	2.28385476248561	0.447727	6.73908697295275	0.515738	5.98778341407499	0.525253	6.77505509420738	0.538462	5.5264076515482	0.520833	6.72636407905673	0.48289	6.21637960474734	0.487179	6.49909669909439	0.510689	5.41091981804912	0.535826	6.46103047892692
Abl2	chr1	+	0.517129	11.8888317274207	0.499799	12.6518124549038	0.474961	3.91591080789402	0.497741	13.2823211659115	0.495749	9.84189900711577	0.502596	13.1042664838971	0.479655	8.39837949129033	0.496574	13.0238285442033	0.500603	11.6018076830098	0.504475	12.4723348946865	0.493949	11.1146821808437	0.519198	12.7604578034404
Acadl	chr1	-	0.401547	12.2177205928775	0.440703	16.1417864041124	0.383123	10.2177156098306	0.429599	13.5792838635764	0.371873	11.8316061672954	0.399676	14.5382535379422	0.411974	12.3416289131569	0.427663	14.5096163933256	0.382554	11.1930477857441	0.454383	14.9578585845816	0.3938	11.780391407962	0.467441	19.3561007364063
Acbd3	chr1	+	0.463529	8.15881480706592	0.43254	7.86860524539824	0.431373	2.20891991076329	0.450178	8.51079598294813	0.4375	7.51689570620639	0.517084	7.8653379817121	0.4375	6.94691387512453	0.491561	7.91719356485498	0.49009	7.40283258557374	0.446488	7.99376903791262	0.476277	7.64869664154437	0.457143	8.42544785957827
Acbd6	chr1	+	0.514327	5.13268039710388	0.56	5.48026956655194	0.577244	12.460947387528	0.564951	5.25366549335741	0.543791	6.00449761136564	0.489422	5.06136306115801	0.506643	6.54281528105747	0.493992	4.899993633189	0.554963	5.40843287904535	0.506742	5.36566062973674	0.59734	5.34200718601465	0.512262	4.11636594868935
Ackr3	chr1	+	0.721649	3.85240543129173	0.729616	4.17858658374249	0.692308	1.581019782989	0.731183	4.34469669932667	0.741492	3.49280805909612	0.768041	3.80718388012413	0.738149	3.43152156534216	0.717416	4.25185230358754	0.744059	3.99486316689734	0.744723	4.19719080732575	0.744904	3.61529068212044	0.681675	4.06828902892573
Acmsd	chr1	+	NA	0.160342389964341	NA	0.0662287569037964	NA	0.146771962016443	NA	0.0875232476039598	NA	0.169542347254005	NA	0.0459434238664335	NA	0.10552171796251	NA	0.0598610684110069	0.190476	0.235379807895569	NA	0.0617703135981703	NA	0.221071283177409	NA	0.0630569327180553
Acsl3	chr1	+	0.482204	33.9783256119319	0.505179	34.7174836251878	0.512588	18.2398614547021	0.485648	38.9954205661087	0.507859	32.8849268497545	0.504941	34.8872167682925	0.46628	31.2193320734336	0.491461	34.9506399818957	0.456162	27.7422508886998	0.511155	34.5168032373012	0.45925	28.6654086072692	0.521037	33.8632010323065
Actr1b	chr1	-	0.536568	29.0861064347783	0.572249	26.4121610397341	0.535119	29.06830040152	0.554316	27.653312064148	0.551937	30.5833000005588	0.559371	26.9389718514822	0.54666	30.9460893115557	0.542392	27.3423961873569	0.541645	30.5611852072515	0.565483	28.0707806944751	0.563749	27.989121362505	0.522061	23.7740452217886
Actr3	chr1	-	0.606161	53.3328656147939	0.601711	57.6373977206541	0.60596	27.9314431026712	0.553465	53.5200151028949	0.576017	54.1177612613684	0.578394	55.4103728530446	0.599615	54.3444718152594	0.602956	54.4853749195057	0.625678	52.7284233815687	0.611517	54.3031912224346	0.614853	50.984501908284	0.581064	59.1320982053694
Adam23	chr1	+	0.237525	0.777960231946001	0.211957	0.314112264691988	0.287234	0.411616203484109	0.176667	0.468014580334723	0.24307	0.654660788436092	0.16	0.38657467278875	0.27685	0.563726565636725	0.196507	0.379337108984478	0.238849	0.761522659365651	0.2	0.362023000966669	0.248276	0.805252056382289	0.163636	0.277137103221636
Adck3	chr1	-	0.606742	0.529348103038104	0.418605	0.351504538541608	0.556667	0.481251783323878	0.410256	0.564503110247676	0.342105	0.519354658121252	0.37037	0.401361912924478	0.455446	0.590258579503736	0.528302	0.410886539445499	0.585616	0.564277682364313	0.251613	0.398819560438247	0.425234	0.560465196425593	0.578947	0.350755230655218
Adhfe1	chr1	+	0.619048	0.306429197620778	0.597222	0.663896790359558	NA	0.172054420069793	0.609375	0.539822034786079	0.541667	0.246259104095476	0.507246	0.535250341423347	0.416667	0.233795974781554	0.736842	0.515573247016652	0.461538	0.245540903344122	0.728571	0.571670712373028	0.833333	0.327827658544176	0.486239	0.911461271674318
Adipor1	chr1	+	0.542557	19.8766368263244	0.545385	19.4224150669327	0.553911	23.649008437414	0.535898	19.0594240687844	0.537017	21.3785063058767	0.546981	19.7061600327731	0.542976	22.0085710933527	0.558219	19.324260759563	0.549412	20.9711664938353	0.568372	19.7044552104083	0.562819	20.4482613220342	0.538462	18.1000941172921
Adss	chr1	-	0.555753	62.8423961007831	0.548968	56.7895270221773	0.511314	41.450267901078	0.53382	50.8893365567261	0.547714	64.8491705443789	0.551771	56.2856311912692	0.5444	64.4609908964592	0.557899	55.4977522854007	0.550844	64.7120730957775	0.562412	55.6725911766356	0.548954	62.5300295235232	0.555899	58.0023329684026
Aff3	chr1	-	0.909091	0.559111210211313	0.818182	0.598474817857972	NA	0.324024056036592	0.538462	0.507329326809899	NA	0.444365457586784	NA	0.601882052872765	NA	0.402986221921693	0.433333	0.624649202505752	0.65	0.482916919236204	0.68	0.546794630592675	0.818182	0.48135205677713	NA	0.567099299189637
Agap1	chr1	+	0.58317	1.97216034410097	0.612094	2.53544907572695	0.541801	1.24512678374396	0.560873	2.54642480705891	0.585744	1.80590802621794	0.627168	2.48018628066027	0.568103	1.79913527407709	0.580739	2.52306716116139	0.578423	1.83369903801238	0.580834	2.40249710178836	0.559859	1.83574890429215	0.583243	2.1020302313329
Agfg1	chr1	+	0.570183	17.1761878746844	0.586695	21.0919990637219	0.557905	6.0312421023869	0.567744	18.7526989276492	0.559598	16.4460341867675	0.588565	19.7729162684416	0.571118	15.0081585049192	0.59303	20.4320817933567	0.561955	16.6936364708799	0.579199	20.2484499404575	0.573697	16.7048354225509	0.580267	25.3164785171761
Ahctf1	chr1	-	0.507498	21.0508364314848	0.517515	22.7225372049715	0.49441	6.52306612845976	0.505881	23.1808852562773	0.499387	18.9438758317056	0.516944	22.5820688501803	0.505296	16.6269631843722	0.509074	22.421225662834	0.520348	20.0058583166087	0.523186	22.0341521833135	0.514252	19.4131954299	0.512307	23.933370610293
AI597479	chr1	+	0.520438	9.22959110220849	0.571429	8.54594493300336	0.458462	3.19728659158036	0.525316	8.23595457236667	0.531014	8.7066177428493	0.537681	8.5047223856292	0.517931	8.0917377461032	0.535007	9.35219558265552	0.549419	8.78166220493273	0.53886	9.51081009414967	0.520235	8.61497785059042	0.510319	9.31288532246285
Aida	chr1	+	0.588331	6.81369244449848	0.580247	6.13105859029523	0.478006	4.69562285704646	0.516887	6.73645447069566	0.504386	6.50094124799415	0.594406	6.41728320274268	0.615691	6.28304718442084	0.511487	6.85642537982913	0.528256	6.27434623745538	0.539052	6.59233150559321	0.536377	5.69399359583729	0.527307	5.99865451480146
Aim2	chr1	+	0.495413	5.87033437504183	0.366906	6.87966800753766	0.555556	2.62652056002002	0.453333	6.59859582367045	0.416667	5.58356117769178	0.336066	6.68718935557189	0.575472	4.98099958293066	0.404762	5.92963978071013	0.590164	4.7039752256236	0.470588	5.81550098355908	0.415094	5.07689791373235	0.541985	8.06143710613344
Akt3	chr1	-	0.409429	7.76664807574395	0.379357	15.2074289509221	0.48227	2.59377220617263	0.369735	13.0298730661498	0.393855	6.64148564964724	0.342144	14.2573279197085	0.439306	5.71869794483493	0.350856	14.8538569998265	0.394673	6.84806524961508	0.374541	14.2541049850409	0.435986	6.07504507657055	0.408537	14.3420726963009
Aldh9a1	chr1	+	0.321378	50.2247812746403	0.358528	48.481714953881	0.241166	40.0510954197346	0.35754	47.9046977621144	0.324658	47.6926150686504	0.359245	46.2686976337036	0.323406	50.5282088151269	0.355852	47.9354108799766	0.309768	46.8092670427534	0.357607	48.3572360090307	0.315009	49.3689266692037	0.36445	44.4306640951504
Als2	chr1	-	0.50849	7.54944448998434	0.488983	8.42178141287279	0.493205	3.21895411432176	0.488175	8.98056714294444	0.497608	6.86491662808913	0.510602	8.59100471651636	0.502432	6.33631006252511	0.478282	8.5230059134786	0.492426	7.34056870445545	0.492211	8.45262603502072	0.504108	6.93868819141215	0.460333	8.579809410902
Alyref2	chr1	+	0.377778	1.02056322011786	0.583333	1.25758600508828	0.4625	1.93003701382297	0.4375	0.927408318992266	0.592593	1.05114721671547	0.454545	1.10119453588982	0.425743	1.30045017715365	0.627907	0.887492457038808	0.4375	1.18712476140934	0.3	1.01064925670695	0.608696	0.894777769732087	0.685714	0.995640733170608
Angel2	chr1	+	0.490668	8.77949752854244	0.482558	7.45906334889523	0.468722	5.10870706542904	0.468382	8.04926218086312	0.478195	8.97693674574162	0.469158	7.91350154000756	0.472063	8.47499968327499	0.465446	8.27924574780559	0.488953	8.57716401415494	0.46432	7.86435320185375	0.481222	8.00695292791212	0.442682	7.81942831152947
Ankrd23	chr1	-	0.477612	0.145093944097864	0.444444	0.187167404746375	0.470085	0.0669844794487514	0.494024	0.178339426397626	0.428571	0.12403693055977	0.376984	0.19290446120263	0.606897	0.0738430314057266	0.503401	0.214687123703312	0.534483	0.0926529805551107	0.476364	0.199149467271732	0.394161	0.106745379766634	0.481308	0.198569718047625
Ankrd39	chr1	-	0.410753	0.790372293076972	0.541159	1.06294516714429	0.605479	0.784115653132855	0.496372	1.10237830223612	0.483412	0.878181051206399	0.534323	0.981253956386763	0.591463	0.788980224428813	0.493381	1.1591511521368	0.551261	0.838626363872755	0.554723	0.998408341522933	0.566517	0.857958934479601	0.486535	1.11619306765623
Ankrd44	chr1	-	NA	0.0828187020596697	0.818182	0.157707283533688	NA	0.0407832699424694	NA	0.155263099528948	NA	0.0810602884314277	NA	0.117245312883209	NA	0.0702485558029081	NA	0.122542047117001	NA	0.109129290375165	NA	0.140990079352115	NA	0.0750581844478248	NA	0.130973364081698
Ankzf1	chr1	+	0.549194	4.66355300349538	0.495685	5.73313198193249	0.532637	4.7606072764352	0.520985	5.49616938684473	0.533499	4.75205359857519	0.508495	5.11235900784225	0.50709	4.76875087188171	0.519627	5.91309756414284	0.533288	4.2047860375647	0.529072	6.20169469431378	0.517337	4.51801945455175	0.549901	6.06156655410981
Ano7	chr1	+	NA	0.113938078812512	NA	0.0362012686891117	0.6	0.136037003820243	NA	0.0914608116166173	NA	0.0876185441905969	NA	0.0290195968241574	NA	0.0749829275983601	NA	0.0673499625326232	NA	0.0896030868320186	NA	0.0689755212191846	NA	0.062836626774623	NA	0.0582501078017718
Aox1	chr1	+	NA	0.140496352792135	NA	0.132774089258846	NA	0.0415781682562216	NA	0.135856247419696	NA	0.0937286521053842	NA	0.113086263159179	NA	0.0759148212900314	NA	0.133259188176716	0.190476	0.145146689610697	NA	0.160986658500732	NA	0.145480168170771	NA	0.182828097936807
Aox3	chr1	+	0.953532	1.32869083029983	0.996016	0.703390702102879	1	0.588233830595503	0.961722	1.08593802760606	0.944444	1.27806216570808	0.955696	0.723307158380135	0.92429	1.17339272652073	0.984663	0.839341606150911	0.952767	1.34338635083832	0.94335	0.872032185797995	0.93167	1.68365349447116	0.98	0.758932728294036
Aox4	chr1	+	0.35	0.24178416226308	0.583333	0.155947632552582	0.44898	0.233978474061167	NA	0.159329602472507	0.457143	0.203929662975928	NA	0.161414611042354	0.550336	0.236638136527144	0.617647	0.218142714346709	0.428571	0.203600017835796	0.709677	0.181069684030106	0.7	0.148729278202292	NA	0.173932538914387
Ap1s3	chr1	-	0.265217	4.01923937990831	0.195	3.20223492002405	NA	1.34959295798317	0.285088	3.3728560908698	0.253731	3.53762155488094	0.16895	3.16854067645224	0.20603	3.20910255668701	0.254386	3.57717202703172	0.298039	3.58880599734591	0.316279	3.23338279455805	0.349206	3.08359720011639	0.25641	3.84568413639281
Apol7d	chr1	+	1	0.381774016811648	0.714286	0.606976336310524	NA	0.336950191384889	NA	0.501871848696383	0.833333	0.340836555928414	0.846154	0.56673565562472	NA	0.297636680567379	1	0.479520748114171	NA	0.369896626271633	0.59	0.651124602029438	NA	0.377127944223247	0.857143	0.691518330870874
Arfgef1	chr1	-	0.625077	7.79732445468695	0.610314	9.9663404109515	0.610052	2.12453308683989	0.609809	10.2121660954274	0.626185	6.70946859784163	0.597691	10.341473573959	0.63804	6.04102162355836	0.632679	10.4874792709582	0.625737	7.01256969797828	0.611956	10.208541133068	0.639892	6.25078642997082	0.604916	10.6054896885744
Arhgap30	chr1	+	0.582857	0.42452417443856	0.5	0.156128558544293	NA	0.149303422374614	0.622222	0.208677566933368	0.460526	0.336909671608914	0.4	0.183359533792214	0.606557	0.23906208670924	0.754098	0.236712864167003	0.670732	0.304719332427454	0.764706	0.223907500379539	0.643939	0.336566167891937	1	0.232727130378061
Arhgef4	chr1	+	0.443662	0.635211908737548	0.428571	0.39522198376576	0.391892	0.453485136048403	0.40678	0.519834899516309	0.547445	0.565905275688499	0.5	0.408113689883506	0.433962	0.597557701645168	0.337278	0.564239040063244	0.416667	0.556320740433799	0.403974	0.543477604280116	0.504587	0.510579631928346	0.409091	0.498517781948808
Arid5a	chr1	+	0.861111	0.177247872876987	0.965517	0.13456479243635	0.958904	0.231944176338106	0.959184	0.167370659589177	0.884615	0.164700504279167	0.891304	0.147513969693707	0.892857	0.183630439118472	0.882353	0.140771767570076	0.769231	0.188832431924013	0.794872	0.138455082784816	0.9	0.149725550879245	0.823529	0.13950868659834
Arl4c	chr1	-	0.597315	1.84401299052487	0.563786	1.96695493424269	0.466258	1.93420245723034	0.469613	2.09657756773253	0.563063	1.99419934208598	0.574359	1.83146839330436	0.626126	1.83126549761705	0.568966	1.79227784680866	0.586614	1.88282646582171	0.538793	1.76263672214423	0.541063	1.7777319231125	0.528302	1.82999784019429
Arl8a	chr1	+	0.515077	17.0825190671585	0.511819	22.3521844032967	0.494075	22.3876552813302	0.501678	19.1398492916562	0.5	17.897735977174	0.490052	20.3795578017187	0.513095	17.655592981779	0.478104	20.1298508651843	0.493122	17.3391132100167	0.491615	20.6134172957068	0.493465	16.7148160436103	0.486683	21.8736161492128
Armc9	chr1	+	0.446894	0.930306313609992	0.419668	1.27969118901941	0.415414	1.05566221140777	0.419453	1.12065161765525	0.428064	0.890170994553952	0.550847	1.24450025562371	0.44186	0.998185000655457	0.46589	1.22263754510852	0.441667	0.914907729608802	0.489607	1.24658696876031	0.422535	0.870015275439677	0.492872	1.18451279671625
Arpc2	chr1	+	0.472506	79.4647686807839	0.453509	82.662058836098	0.492891	73.4980429816587	0.485054	78.2959684856206	0.458766	83.4047516167636	0.471814	82.0686474061872	0.44988	85.9301399645526	0.455562	79.0788956509692	0.443418	81.5391087224938	0.476288	80.1674757827169	0.447581	78.9196382163433	0.460799	79.7650162101041
Arpc5	chr1	+	0.507414	51.5659950352387	0.532157	52.5955444638223	0.467509	55.8243265891211	0.503837	51.4806643745267	0.487338	53.775689013358	0.485199	53.597231793836	0.502534	54.8255004230277	0.512763	53.4857506542491	0.515014	48.3970680553474	0.516822	49.9468951702617	0.496614	46.0975236557461	0.515729	45.8285735252413
Asb1	chr1	+	0.490319	5.2857182439538	0.52871	4.09222923483821	0.445325	3.42945225824748	0.525215	4.91278336881808	0.518397	4.87310040629699	0.552304	4.49370622463631	0.511097	4.46449190281766	0.545331	4.12996001589973	0.500484	5.07828838019228	0.525424	4.00242862493805	0.462557	5.19208730577598	0.519	3.76345185584031
Asnsd1	chr1	-	0.545096	1.4286226105293	0.609531	1.31634708433361	0.59621	4.84415123172691	0.59749	1.46247704322147	0.606733	1.69028291315533	0.58949	1.35178019900284	0.600644	1.82050386801733	0.575161	1.54912147977829	0.612699	1.48403842680513	0.604547	1.36662816872	0.608824	1.34820898535484	0.633673	1.45219865823758
Aspm	chr1	+	0.457772	10.4248023353351	0.444099	10.0111906739427	0.501166	2.9849734698476	0.470461	11.6438075877719	0.483323	8.73935633558158	0.463789	10.8718626941755	0.463305	7.19551441543539	0.459184	10.9700069175874	0.453853	10.1220965860749	0.464464	10.7104371316456	0.456047	9.83220692934501	0.419277	11.3885575601767
Atf3	chr1	-	0.399038	1.78763822356652	0.273927	2.57785301606811	0.367089	1.48450854085288	0.297398	2.32770058453719	0.445455	1.91768275177414	0.322581	1.99265203708162	0.475	2.43280263609053	0.297436	1.81608912310516	0.465986	2.04398202162399	0.37037	2.00062198036095	0.445714	1.31330300282828	0.343373	1.83983970234489
Atf6	chr1	-	0.528676	4.98357569621783	0.513894	5.53717287614669	0.558237	2.31521393012342	0.507609	5.59734222289563	0.540735	4.70326777509291	0.512432	5.79729870933243	0.520338	4.18141714961515	0.509434	5.54577629666709	0.522085	5.16396440957167	0.532713	5.27454162132601	0.508202	4.77983128465007	0.529061	5.27555707463649
Atg16l1	chr1	+	0.485637	7.49796555743125	0.523651	8.72875004074983	0.483251	7.89765171144004	0.538713	10.0276372328023	0.480531	7.8388383759484	0.516406	8.79143682409084	0.513305	7.6521370423223	0.528932	8.32108175929375	0.491786	8.34482816951434	0.487135	8.54950504390771	0.49249	7.62619971020563	0.53436	8.40284844215268
Atg4b	chr1	+	0.424006	6.49329438547707	0.440575	7.32628313594414	0.511663	8.95429149340032	0.477366	7.19780102821313	0.470405	6.94377491935801	0.460701	6.90465181310607	0.450374	7.36334522959195	0.455556	6.88880640154386	0.434513	7.50497616951871	0.451548	7.14020948721792	0.47724	7.35781526411632	0.432451	8.1925024959866
Atg9a	chr1	-	0.525114	1.05130307614551	0.558559	1.14890085380001	0.58427	0.338614565010665	0.542536	1.19647122635422	0.556911	1.12328737579996	0.555556	1.11861933554668	0.532209	1.05418552566608	0.579119	1.34800816512435	0.609346	1.03050081147427	0.568471	1.1922877322858	0.5088	0.968866192270599	0.562642	1.07195253518892
Atic	chr1	+	0.492326	45.7114740412353	0.503365	36.1874138266053	0.504912	33.1359359819574	0.489344	36.563021894502	0.493612	45.9764841414986	0.489483	37.5872430116921	0.496159	46.5697036558757	0.489518	36.9017154630777	0.484829	45.9147178551083	0.483876	36.9500473290029	0.496581	42.0720435090818	0.492238	30.695048762501
Atp1a2	chr1	-	0.197652	7.7062696360254	0.183628	17.7649038404573	0.206186	7.1487658125759	0.173889	14.6745995082896	0.200127	6.52423266632745	0.16951	15.5749635793967	0.185824	6.66218730486811	0.192027	15.8257997300914	0.167654	5.73154203851664	0.182954	16.6846242341995	0.157168	6.28520546932173	0.163782	18.8177987444956
Atp1a4	chr1	-	0.00137741	2.66356870632921	0.0012837	2.57223094669085	0.272727	0.561628417844402	0.00120048	3.29899421858632	0.0015674	2.03474774643655	0.00124533	2.87695233963844	0.00541516	1.72773588341855	0.00774443	3.48915590201877	0	2.1741271486135	0.0042123	3.53231549407627	0.00114155	2.63175626322669	0.00190114	2.60931547906465
Atp1b1	chr1	-	0.474112	67.5541749962103	0.459625	78.6243898561132	0.471469	42.0419247483102	0.462326	76.3199026142496	0.467484	70.5423980426662	0.464471	74.3367348567622	0.487522	71.3136559241798	0.474836	76.7669597230146	0.482568	74.8214683021491	0.473783	76.9275189916787	0.470337	77.7755667277825	0.476514	85.5547007648624
Atp2b4	chr1	-	0.615063	6.19310518486603	0.630631	5.46381421197285	0.636598	2.12693988755449	0.651494	6.79850495491407	0.584507	5.34381552174852	0.608098	6.02471281591325	0.588181	4.75711822000289	0.594121	6.90660680099232	0.605311	6.19738491767735	0.605701	6.76553163910989	0.597055	5.94478405153805	0.574895	5.82852867343839
Atp6v1h	chr1	+	0.64133	8.01267118456862	0.69403	9.44734101022139	0.726813	5.67959655498192	0.704989	8.89227468793625	0.679814	7.6305089606118	0.669145	8.70130546826897	0.623377	7.89154920979113	0.65567	8.41015662693871	0.597403	7.212097847747	0.666065	8.67155985789465	0.623632	7.46065858965832	0.663391	9.85436353071519
B3gnt7	chr1	+	0.375551	9.30764499289891	0.296492	11.1594624152334	0.368319	12.6508034249287	0.310246	9.69213470577849	0.387377	9.5734007996	0.308522	10.4135108122168	0.369546	10.356090236338	0.282447	9.06662465731336	0.347305	8.75548430042375	0.283333	9.01864602606973	0.347214	8.20855041652376	0.277021	8.12094948561037
B4galt3	chr1	+	0.473684	5.60028334593505	0.421053	5.77483803561908	NA	7.90767401844458	0.692308	5.69997563198485	0.3125	5.71198543746426	0.526316	5.80502345777814	0.809524	6.16324827354204	0.541667	5.96971996030693	0.5	6.02908964874319	0.472222	5.96553554582629	0.52381	6.21617106004497	0.5625	5.469384409714
Bag2	chr1	-	0.36194	1.60672072325373	0.440111	1.84348836524523	0.144828	0.791371588879368	0.380062	1.76770098805235	0.359375	1.7021885727881	0.379538	1.80942261544911	0.368421	1.64795757516762	0.439614	2.2713743287133	0.373134	1.48595251838953	0.435268	2.24990282879156	0.46875	1.5099031329661	0.432056	2.24674592880201
Bard1	chr1	-	0.481647	11.9822665972699	0.461229	12.0549265167627	0.534916	7.53722406916452	0.47104	13.3260396917381	0.476305	10.7690762018604	0.437591	12.584956605129	0.456118	10.1134598307378	0.463503	13.001729209207	0.468028	11.9140089681394	0.482471	12.5062906075596	0.488889	11.4774701999712	0.476956	13.7852438843159
Batf3	chr1	+	NA	0.0784106934966941	NA	0.0722483929655209	0	0.180996509528649	NA	0.118645919981161	NA	0.0910750052325553	NA	0.0814438528277228	NA	0.0779409266207125	NA	0.0619007927729557	NA	0.0819612957070838	NA	0.0547500807127176	NA	0.0783785601346582	NA	0.0894247596868201
BC003331	chr1	-	0.480519	6.16946811167623	0.512894	6.08914522111698	0.494624	2.80679509423612	0.430267	6.45574488039781	0.44964	5.49150294233397	0.404432	6.11203670359957	0.472393	5.38871210167239	0.507246	6.47211179873703	0.490625	5.10508560710799	0.495595	6.23018718978535	0.463816	5.0587224099165	0.459893	6.36990829892204
BC026585	chr1	+	0.575835	1.69869851600289	0.484848	1.85547074005996	0.472258	3.19393840571549	0.501071	1.85209659448704	0.498994	1.95153537257983	0.504566	1.84781767433758	0.552063	1.90096812737721	0.546875	1.81682909770221	0.570076	1.71868197113374	0.565476	1.8977795340969	0.527027	1.67453906950993	0.550218	2.16978557101985
BC034090	chr1	-	0.447368	0.363618623893458	0.630872	0.410470079579622	0.517647	0.230710287189184	0.552448	0.434313154963502	0.713043	0.398023914560787	0.613095	0.418331147407739	0.590361	0.360304731641451	0.552	0.496390495723678	0.517986	0.316947761487833	0.462462	0.525642250734626	0.633803	0.264895129324964	0.5	0.273568307493635
BC055324	chr1	-	0.500426	19.3017690298107	0.511984	19.0191760820177	0.508435	16.5065227740536	0.511786	18.601996626869	0.505892	18.790967020417	0.509675	19.2004930214006	0.48326	18.8387917142661	0.512543	19.6682947072405	0.496738	18.6980645545231	0.488229	19.7028845443928	0.500699	18.4708052322815	0.512563	21.3158321197543
BC085271	chr1	-	1	5.12634955862688	NA	3.87964638755672	NA	6.71845319526061	NA	3.99911199408436	NA	5.55573456263819	NA	4.46089944940117	1	6.30310422591783	NA	4.40666564041717	1	4.98537836395088	1	4.20001339697425	1	5.52198303369147	NA	5.07811006523178
Bcs1l	chr1	+	0.513393	7.19797288631012	0.437333	5.52032353511754	0.466561	9.37900668528265	0.446384	6.3832970536748	0.429577	8.14820483401678	0.473558	6.23034327619375	0.453652	8.34164545007779	0.504651	6.50060389422158	0.457831	8.05047763143528	0.426724	6.40497444483759	0.476038	7.72608432499641	0.479675	5.35053895879576
Bend6	chr1	-	NA	0.242500712812543	0.218182	0.434237445457889	NA	0.147863196435309	0.0227273	0.443092742963844	NA	0.208327751665102	0.190476	0.392871560161948	0	0.218307500403293	0.3	0.421066009853336	0.1	0.236524909479059	0.137931	0.430844519563569	NA	0.270757716445298	0.0813008	0.678364307168252
Bivm	chr1	+	0.610462	6.55732727591704	0.617507	5.70251060301216	0.577876	3.17846610542628	0.606045	6.31037327254568	0.633317	6.03088897226689	0.62891	5.76214936027288	0.567473	5.59619374005964	0.600193	6.37615379202911	0.605805	5.4036242911954	0.618705	5.99298972952204	0.582561	5.06217602163857	0.581284	5.53453367066948
Blzf1	chr1	-	0.540984	6.1543173497197	0.569591	5.93282890805921	0.501548	3.19941900888778	0.549223	6.74130080772211	0.457788	5.78134609255819	0.5359	6.35649904153974	0.580681	5.8223624980124	0.494041	6.44445554059298	0.508455	5.70657476277669	0.528953	6.36480388531358	0.499421	6.07790334232219	0.536193	6.3496984078729
Bmpr2	chr1	+	0.490687	2.56425270503318	0.489734	3.16634417726686	0.511719	0.500290586968219	0.477869	3.27036154033083	0.508698	1.95729975934197	0.504218	3.34633405914164	0.526087	1.57605499302026	0.493267	3.57865614769644	0.472533	2.2213154812516	0.525059	3.32639893267076	0.502955	2.06448246981569	0.513395	3.98661476351919
Bok	chr1	+	0.682353	5.22324951044371	0.710112	4.80491569469561	0.701995	10.5743337465177	0.642398	5.5528324197805	0.662447	6.38701092130238	0.676815	4.94030247195255	0.722304	6.96094227977516	0.689873	5.61818900269847	0.704545	5.93024394945371	0.700704	5.93314892523568	0.622896	6.50342694953842	0.725753	5.20019557702721
Boll	chr1	-	0.277778	0.521163903997005	0.583333	0.549979069359546	NA	0.318746236384278	0.363636	0.443809293823842	0.736842	0.4470191406514	0.48	0.50996532244888	0.666667	0.428601902032061	0.772727	0.498336864429745	0.631579	0.45375778337881	0.588235	0.426551161386503	0.684211	0.395387940221697	0.431818	0.563889402226933
Bpnt1	chr1	+	0.360359	46.3356914200046	0.358539	41.6553329533232	0.363504	22.4643921776499	0.380319	40.5954280609499	0.374891	43.1198616676105	0.355316	42.9784973663439	0.378786	44.5798852314015	0.377804	45.012637963469	0.349815	42.701782382688	0.345612	43.7593363995334	0.353937	43.2427504314191	0.345235	43.867314876469
Brox	chr1	-	0.604987	8.77302974201425	0.505882	9.55748177242791	0.521614	3.70329109545432	0.54109	10.7059316120449	0.55102	8.07360288451343	0.595701	10.0066173111247	0.530108	7.64469655180551	0.592145	9.60367589281448	0.589532	8.08249174374988	0.611066	9.7757650744192	0.536082	8.73445667925213	0.56326	9.84500338798528
Btg2	chr1	-	0.509965	9.07322207654077	0.41786	12.9713883684454	0.511216	8.55536369865819	0.499157	11.2648243788389	0.573545	8.89224410093574	0.490196	11.0745890911924	0.551174	9.34331562360697	0.457903	12.2275907186461	0.504968	8.57633838649815	0.465264	12.5272695614278	0.494865	8.31884549235853	0.500923	13.269792414659
Bzw1	chr1	+	0.509429	203.473907468402	0.540764	166.576749333664	0.531593	71.1161113731573	0.542866	168.671831937384	0.541497	197.307054734147	0.517308	175.255799616909	0.522693	180.463845588941	0.554247	174.834740453061	0.537321	190.376836976615	0.530294	162.86097750641	0.53766	186.709907777522	0.530048	167.474891718147
C130036L24Rik	chr1	+	NA	0.211556302309639	0.956522	0.342808074133687	0.755102	0.255395367992368	0.911111	0.287564044940417	0.782609	0.257587902790563	NA	0.309824883042316	0.9	0.206904887370215	1	0.322505342120027	0.867925	0.225526389873797	0.939394	0.33570223594377	NA	0.219733934137961	NA	0.244046101199063
C130074G19Rik	chr1	-	0.6	10.0878909562527	0.569281	8.98619738975234	0.563051	13.3216040106098	0.560223	9.80644087838408	0.560016	10.763541199949	0.51062	9.30912331862648	0.603324	11.3849531348158	0.545782	10.0972736336432	0.60501	11.8992899312921	0.557912	10.840485056149	0.621821	12.3603350880903	0.620173	9.38743412631315
Cab39	chr1	+	0.500301	19.7953900620368	0.487626	22.8393267048795	0.432394	9.49873141067804	0.469262	21.4519189609946	0.49859	18.6345341909339	0.50252	21.8297733566512	0.498333	17.8520184697579	0.471325	21.423794529625	0.505693	18.8300336216674	0.49734	21.2804939921217	0.476854	18.1680372730822	0.491384	23.6454979616167
Cacybp	chr1	-	0.460347	256.194006516803	0.475097	203.654147959374	0.356536	175.381045488799	0.465445	197.039560036122	0.463731	264.524490885031	0.482417	205.95873252676	0.466006	271.639867470332	0.461516	202.946399990565	0.481875	237.532729427621	0.486188	201.672187383391	0.469877	246.250819489434	0.48703	197.859436658675
Camsap2	chr1	-	0.484396	7.76253074313276	0.487921	8.1798567808097	0.527972	1.91168459232522	0.488636	8.18398384678784	0.5	6.34935713314358	0.488077	8.3897216648158	0.498838	5.6083315563503	0.484446	8.21684577662542	0.484933	7.1512208983491	0.47541	8.30684998776593	0.473148	6.80916958995449	0.4837	8.6742940806185
Capn10	chr1	+	0.59188	4.38679955166592	0.600671	4.55974054359173	0.529183	5.49121222636462	0.482143	5.33574209579052	0.616492	5.27437023860266	0.452276	5.18746994494969	0.525333	5.0149534361033	0.458924	5.41362740954939	0.551546	4.78873863088583	0.509658	5.51539844867744	0.567812	3.81329549352059	0.476427	3.68447345473444
Capn2	chr1	-	0.817518	0.789420819632596	0.712177	1.24109245916079	0.818182	0.475488456410374	0.585153	1.07045560940559	0.697183	0.685399341584883	0.681818	1.11833156442069	0.753731	0.631676508429873	0.698039	1.04831637089972	0.754902	0.778282950588843	0.747036	1.0847049256538	0.770053	0.787124565066739	0.714932	1.5220830496442
Capn8	chr1	+	NA	0.190988274723281	NA	0.286921461122191	NA	0.0958393321343674	NA	0.293823558456508	NA	0.181326228587543	0	0.283668483332585	NA	0.178288319095942	NA	0.31465962671112	NA	0.22409803318879	NA	0.341261672092294	0.09375	0.28553496567677	NA	0.274637194653561
Carf	chr1	+	0.40991	0.507528390007489	0.409884	0.546903013399028	0.482759	0.115416048085562	0.461017	0.626782443632226	0.515385	0.39766311586071	0.409836	0.527161100844028	0.380952	0.342880645635257	0.46988	0.54424452211276	0.429167	0.453672179148664	0.532353	0.541438479129045	0.522124	0.430792407969084	0.464883	0.686734484123763
Casp8	chr1	+	NA	0.335454390160805	0.34375	0.473607195764086	NA	0.224806673993715	0.545455	0.372818674560175	0.421053	0.367010549084567	NA	0.349679621600458	NA	0.279663252259352	0.722222	0.419810314602898	NA	0.279692953794629	0.5	0.375631892950682	NA	0.181720136276255	0.6	0.382574453665348
Casq1	chr1	-	0.363636	0.738109477915703	0.232558	0.909266022463496	0.394366	1.24080250660276	0.306122	0.814298435866443	0.552632	0.745498633297749	0	0.785180152308364	0.418919	0.92508409394799	0.1	0.817945300183083	0.518519	0.609907223541367	0.277108	1.05637548643221	0.409091	0.821211263377052	0.222222	1.16203487537937
Catip	chr1	+	0.324324	0.396450991677767	0.047619	0.273970415522917	0.25	0.620983388582971	0.0425532	0.34938278235137	0.191011	0.585470995871496	0.272727	0.189552698930113	0.179856	0.731855078051837	0.08	0.268264765423094	0.235294	0.635059345044082	0.192982	0.367211483387197	0.182796	0.673690488632783	NA	0.274512980635174
Ccdc115	chr1	-	0.560892	12.5751226780158	0.529412	11.6265435170159	0.568966	17.7176134422637	0.597774	10.7694814356281	0.531624	13.3207061909962	0.567044	11.076082861471	0.568354	13.7099928878093	0.532867	11.5010323749771	0.538776	12.0958177241015	0.537805	11.4544390534591	0.608769	12.1429717986617	0.581227	10.1787477766803
Ccdc150	chr1	+	NA	0.205751939751508	0.153846	0.258520750869705	NA	0.10074487054475	NA	0.313507479274289	NA	0.162219077234772	NA	0.282069787573427	NA	0.116514001418523	0.0909091	0.272825274067937	NA	0.177742829087215	NA	0.273649150106783	NA	0.139604688109196	NA	0.323536946101536
Ccdc181	chr1	+	0.460432	2.40243649238257	0.438356	2.23629402406478	0.401163	3.13239987926959	0.452381	1.9774622782918	0.470199	2.23236812589955	0.323077	1.94557470881959	0.492537	2.56246004749179	0.322148	2.37466412517771	0.482051	2.16917385861165	0.404762	2.06108672101595	0.425532	1.90804783214768	0.415094	2.33779696863298
Ccdc190	chr1	+	NA	0.297889414501822	NA	0.174667989827327	NA	0.177114844189493	NA	0.218543868754226	0	0.310353574635897	NA	0.150018261783014	NA	0.315845042202089	NA	0.211751912796067	NA	0.240181746018006	NA	0.144069663697825	0.0909091	0.332055696921122	NA	0.20589870418087
Ccdc93	chr1	+	0.493941	6.42384402232737	0.588622	8.03229005077853	0.583096	2.52399098799632	0.599211	9.07877367599204	0.53267	6.00849621414605	0.573069	7.92100354540967	0.531919	5.34537534278952	0.59304	8.50788401638568	0.527334	7.20195555736655	0.598178	8.87728189425251	0.514805	7.42711469282235	0.592611	9.01227533386089
Ccnt2	chr1	+	0.510003	14.5851281596403	0.528524	11.9726736045334	0.534833	4.58923284249343	0.511554	14.1938431396802	0.529432	12.447511269018	0.499351	12.9170280450515	0.536321	11.2866404208168	0.51553	13.2196368844644	0.530179	13.642976888417	0.539191	13.2446410319686	0.540687	14.4435369365879	0.499195	14.2507671903771
Ccnyl1	chr1	+	0.32906	11.0465914083183	0.441948	12.8367687589996	0.496377	6.56032152913686	0.386973	10.8301795728957	0.370629	10.7906699226211	0.380567	11.8507770905763	0.417969	10.0917126966668	0.377926	12.1730626359129	0.356322	10.9662148238325	0.346032	11.4969217417	0.323077	9.45660687375617	0.424107	12.7583916671381
Cd34	chr1	+	0.421053	0.755797340277874	0.24	0.332372339490353	0.342541	0.651753471910471	0.318182	0.389871469567724	0.465649	0.752173351513845	0.386364	0.350886334933083	0.503597	0.855422518058329	0.213333	0.501736069157912	0.328767	0.863473850981276	0.297297	0.48147133000974	0.4375	0.889414956888277	0.333333	0.333030562515429
Cd55	chr1	-	0.43786	5.72503689954001	0.487981	9.3436242821787	0.581662	2.50902355416016	0.457923	8.37330383073498	0.470588	5.28080017049167	0.428777	9.16598287128141	0.519752	4.72956399537779	0.426717	8.36915627988543	0.477726	5.87976452817605	0.462751	8.2491534505538	0.465102	5.67948844628432	0.481666	12.4882676550947
Cdc42bpa	chr1	+	0.373031	4.3528304579187	0.379845	5.48168148620809	0.337864	1.63432512624143	0.359218	6.23857893226153	0.356976	3.85479254839166	0.402202	5.35914368192049	0.392122	3.37927659273758	0.406012	5.0256533543176	0.381729	4.48669908895247	0.368596	4.96801361642358	0.349347	4.41662130240295	0.386016	5.91065896253057
Cdc73	chr1	-	0.569294	6.84104295776671	0.566937	6.25570803317142	0.566038	1.40298224507818	0.555193	6.62274652016633	0.559864	5.8749288020109	0.538426	6.59632412724	0.567404	5.35062061427929	0.541838	6.73982281665033	0.58922	6.08466370759649	0.589613	6.54383832100707	0.577034	6.0936608840703	0.555313	7.2787939122417
Cdh20	chr1	+	NA	0.0663251469884643	NA	0.0467332030893937	1	0.17111095116612	NA	0.0435948004164231	NA	0.0833817551644314	NA	0.0504298676615217	NA	0.0651521649072491	NA	0.0492799431996063	1	0.0949095906783017	NA	0.0622673970219413	NA	0.0655179903099709	NA	0.0800911061178131
Cdk18	chr1	-	0.51594	5.30629020217953	0.515741	3.64500270291216	0.480597	5.74887123986349	0.528409	5.04502444474824	0.548794	5.46494001276111	0.496503	3.77371714267997	0.520649	5.62264928459643	0.476415	4.60069085170483	0.479376	5.37516203445435	0.493724	4.70897320682455	0.546244	5.63320070921799	0.521092	3.38367551221468
Cenpf	chr1	-	0.480776	15.9417925125423	0.479939	14.6001459482168	0.522811	5.58722564856332	0.496621	15.3883383878519	0.499911	14.2157667345804	0.474788	17.1383462201589	0.487352	11.8535604501765	0.478038	16.2049154347214	0.502992	15.3419342352653	0.484311	16.1782801538107	0.50015	15.088109490271	0.49683	20.6703060616759
Cenpl	chr1	+	0.52518	4.55152390613585	0.523256	3.69998197299899	0.461538	3.03262909334606	0.504348	5.12627137195188	0.515152	4.46428406157982	0.544554	3.79374539623413	0.577465	4.51114145486577	0.457447	3.64028523701859	0.426357	4.32302561331752	0.510204	3.85362697163314	0.458333	4.23316066006154	0.490196	3.44176586170757
Cep170	chr1	-	0.51009	2.96768009899207	0.520695	3.96343419640317	0.587302	0.321297259042184	0.5148	3.5741488614885	0.524862	2.38046317266762	0.525019	3.95063327518064	0.53494	2.00682879969327	0.506994	4.02955577436671	0.502354	2.56326883776739	0.501104	4.03120073594954	0.534268	2.46193966369009	0.510679	5.0125206195787
Cep350	chr1	-	0.539984	2.6649618652758	0.494637	3.18596810780571	0.464052	0.456929870974458	0.530429	2.89170028787543	0.549846	2.07138380130288	0.518942	3.44135419976694	0.521851	1.56580470948467	0.53736	3.46909723276834	0.541974	2.41421270213938	0.508726	3.30472756677549	0.518617	2.20170210196908	0.495399	3.51246429700066
Cfc1	chr1	+	NA	0.346166247935946	NA	0.208018059313588	0.837209	0.781689552720934	0.62963	0.574599031257874	0.625	0.363616958390977	NA	0.29181436883369	0.666667	0.430863437815192	NA	0.339476531793991	0.642857	0.389015247753779	0.518519	0.288250150213879	NA	0.336997662978978	NA	0.188813071324323
Cfh	chr1	-	NA	0.179251166667141	NA	0.0825819040195183	NA	0.056031082761605	NA	0.11301296326489	0.571429	0.170032026350069	NA	0.110331932479965	NA	0.10393673132446	NA	0.0825466971739081	NA	0.158978942181166	NA	0.102811397964869	0.454545	0.244876200975165	NA	0.10008548606306
Chil1	chr1	+	NA	0.251202946154597	NA	0.185168714709956	0.1	0.32214183500942	NA	0.18193003668789	NA	0.223046065774779	NA	0.108233574745734	0.4	0.253027268521998	NA	0.176275973713285	0.2	0.258864723897581	NA	0.138094163737748	NA	0.227664000973163	NA	0.140061051481666
Chit1	chr1	+	0.7	0.827913239763441	0.623656	1.21578819459975	0.801653	1.4830806622545	0.682927	0.931527610440771	0.777778	0.873482059826259	0.613636	1.00326262342822	0.72619	1.15213437182538	0.516129	0.863673186342663	0.850575	0.989968473622646	0.716049	0.984126775477688	0.795455	0.965502946275861	0.352941	0.845852296481215
Chml	chr1	-	0.512863	5.46834952280303	0.537572	6.88002359500989	0.265823	0.779687514195629	0.520587	6.84798271298515	0.502105	4.29421106329315	0.54139	6.88212761211176	0.515982	3.5528448264506	0.46	7.59095497793159	0.524187	4.26211283953914	0.523261	7.0836559447416	0.478758	4.40153466913341	0.492383	8.8950663731835
Chpf	chr1	-	0.579387	6.51520725526206	0.548491	7.02053757304408	0.572549	12.0453711021631	0.557089	6.37664778591056	0.578782	7.74760614662932	0.527141	7.18840098053668	0.57063	8.29595865456753	0.552257	6.64359798569784	0.55122	7.71478859653272	0.570204	6.78638731074948	0.556466	7.59917744327152	0.56	4.99987838814315
Chst10	chr1	-	0.783883	0.586127143162517	0.804348	0.531624889800424	0.707948	0.632692595366979	0.76573	0.750444674236214	0.80315	0.57259641391558	0.759109	0.541155811589502	0.74031	0.606544447267979	0.676948	0.574851467144837	0.784471	0.583825074362123	0.727273	0.581527732558425	0.801626	0.507419941988455	0.730038	0.477470214710303
Clasp1	chr1	+	0.492548	3.94757898751282	0.494804	4.08433041418059	0.489242	1.69872627616061	0.46393	4.52188683863404	0.521412	3.31723070262561	0.485627	4.17198286172047	0.533333	3.11862934516604	0.494979	4.40139622338698	0.530154	3.74290519675462	0.494975	4.27549942790381	0.504303	3.66962218305463	0.484706	3.96680009545619
Clk1	chr1	-	0.513018	14.5440313959888	0.537087	16.5756866177946	0.538961	5.41838129707005	0.550551	12.1179160088655	0.556586	13.4983629364324	0.580515	16.6323185594306	0.579839	12.5788010372051	0.600904	16.134970561603	0.581566	13.8512885501243	0.571516	16.3846272259013	0.570248	13.5621963708106	0.568369	17.6187257844093
Cnga3	chr1	+	1	0.308545187203349	NA	0.218689695917242	NA	0.123268708844545	0.692308	0.195219947379044	NA	0.275676238355555	NA	0.135131435704302	0.764706	0.279959002359912	0.857143	0.246255606990516	NA	0.255607693747745	NA	0.211495140119862	NA	0.287857493269888	1	0.284215140790076
Cnih4	chr1	+	0.46413	11.8129943266951	0.461377	12.8213467761117	0.511478	15.5633524387478	0.462234	12.6025542284436	0.403974	11.9956109984652	0.445224	12.8969439919167	0.494808	12.7038085788809	0.457442	12.5991290150347	0.466162	11.5564343662615	0.462094	12.5733857046329	0.4413	11.2531080195533	0.44664	13.9961154526196
Cnnm3	chr1	+	0.462998	6.21964582435313	0.480357	7.31013910287303	0.487418	4.93571067667504	0.470269	6.29548529072718	0.477292	6.03989290386507	0.496239	7.52076753096197	0.500122	5.79316697074882	0.484236	7.45706205914577	0.443702	5.66977070090692	0.494176	7.24935658154718	0.454873	5.34801943220622	0.504486	5.83368757553054
Cnnm4	chr1	+	0.5	0.622349360186642	0.472727	0.639145430811517	0.730769	0.437707299763389	0.505155	0.742492846355174	0.457627	0.635520217191933	0.571429	0.631460177073681	0.48	0.685638051570344	0.745763	0.666777181354245	0.578947	0.739239382768197	0.521739	0.770815960467017	0.525641	0.77761789522706	0.75	0.717161943379872
Cnot11	chr1	+	0.537706	28.9450655442827	0.501321	29.0301812521052	0.506032	33.0775603510175	0.519923	27.9828785392459	0.520523	30.9551221362262	0.50688	29.196014133699	0.520221	31.3201636594015	0.50313	30.1687413276481	0.524097	30.9591844934158	0.515451	29.0159218578561	0.524788	29.8903587685891	0.511517	27.5251761922099
Cnppd1	chr1	-	0.60241	2.53610412978002	0.52795	3.18653396272386	0.586521	4.10045223483103	0.502404	3.82291714643714	0.637584	2.6921205863481	0.501466	3.14938071343966	0.532178	2.99306298220038	0.513793	3.07756712180828	0.526596	2.76629455368103	0.52815	3.40699571217008	0.508711	2.69000086615695	0.52381	3.23448046551616
Cnst	chr1	+	0.509063	1.83048122114139	0.46571	1.61173491266336	0.505682	0.893191418784262	0.531664	1.84102530048446	0.509615	1.84537966466399	0.522562	1.61988902854739	0.510791	1.5989248094312	0.48939	1.72163919408968	0.475444	1.78240859451683	0.480795	1.79628964437004	0.573009	1.93287421618633	0.515873	1.63824388209363
Cntn2	chr1	-	0.575	0.632569673599351	0.567568	0.437141992229071	0.583333	0.217472052882713	0.615385	0.449600273813126	0.658228	0.497120347241318	0.466667	0.333956172824863	0.554217	0.62744205129436	0.591549	0.443216823625104	0.54902	0.782713396168395	0.567901	0.44034775025508	0.585366	0.723793653996737	0.433962	0.569848564358017
Coa5	chr1	-	0.650794	25.5331486358618	0.667057	23.0844255553976	0.757841	18.1210879436726	0.634455	23.4990116108257	0.65919	24.5559866229861	0.624351	24.9638913549016	0.659488	23.0749473565726	0.644041	25.0845322521505	0.633424	24.4619310828918	0.622866	24.3356017623097	0.632532	21.8592879279216	0.636115	19.7767717019732
Colgalt2	chr1	+	NA	0.46829147362503	0.811594	0.631943673240997	0.454545	0.263857308516926	0.708861	0.642063946674891	0.8	0.459125299640904	0.6	0.575346833431032	0.708333	0.404642851689808	0.677419	0.582188257116668	0.72973	0.484941615574447	0.64	0.550244299308944	0.748031	0.513066608553558	0.916667	0.555097086013558
Copa	chr1	+	0.457711	23.114640883572	0.448919	25.7914443029936	0.518656	15.3195415905359	0.461521	25.2974795370304	0.478139	22.7666567859012	0.450468	25.3929075733617	0.462296	21.5973580096084	0.482462	25.5014972345742	0.476779	23.5713737325711	0.449031	25.3010063428953	0.465416	22.2816078958169	0.442074	25.2574741326825
Cops5	chr1	-	0.47797	38.4335734656797	0.479549	32.2114620775722	0.449458	43.8115153856158	0.48706	32.6026134275157	0.501201	38.3738512859559	0.501485	33.4086605830204	0.463431	40.4946037183293	0.504229	33.5993426858112	0.488099	37.8748774313325	0.496959	32.9882881238752	0.476599	38.5715442116103	0.478821	31.0006031458387
Cops7b	chr1	+	0.495935	7.7568311705885	0.481656	7.78793462509883	0.455863	10.8590829131085	0.475832	7.35498957676533	0.4614	8.69252217484432	0.483117	8.23082061742335	0.49505	8.65546356090518	0.496071	7.73585455413696	0.492568	8.52692544124502	0.508514	7.79120381841322	0.487051	7.77124205388954	0.467862	6.54174344073708
Cops8	chr1	+	0.558978	23.243325679559	0.558059	22.9503281890654	0.553607	26.7005405893831	0.538365	23.2980296802796	0.556991	24.8547886756278	0.554728	23.8772433669615	0.555475	26.5061951832592	0.550498	23.2915092691578	0.551583	24.320243877108	0.554237	22.9850548812259	0.547937	22.0033411156373	0.523152	20.1430452333193
Coq10b	chr1	+	0.536769	4.49873602620027	0.562021	5.44486368336654	0.583043	2.87998688995077	0.559419	4.86850944379911	0.560911	4.88555896643527	0.538071	4.94457693134225	0.565888	4.53071660797966	0.524282	4.88179263335869	0.585075	4.22975800263202	0.561267	4.48422450124609	0.573471	4.27742061183248	0.541373	5.13808753660392
Cox20	chr1	+	0.504762	12.2669223159457	0.507937	11.2375297697289	0.629787	21.9734733309972	0.524229	11.9176565641221	0.543651	13.7046119765025	0.567347	12.5859601800373	0.590659	14.46295843357	0.531136	11.467309636609	0.538983	13.5298834552857	0.525084	11.9250033831404	0.547101	12.3894756407285	0.579787	11.988551152799
Cox5b	chr1	+	0.575419	49.3888155756393	0.563571	46.3344143250452	0.584663	168.749134931661	0.553292	46.5899111427132	0.569121	57.3352719442267	0.552499	46.6795547435512	0.584627	65.5160431066151	0.537671	45.0327868577938	0.573462	55.8239239624598	0.558509	47.1947711578703	0.581354	55.8186500942703	0.534673	45.1001344171261
Cr1l	chr1	-	0.429027	4.99877168306719	0.432815	5.47971842425916	0.5	3.47558573656301	0.401062	5.34334617831833	0.464223	4.87820837791122	0.42112	5.5550389574757	0.453689	4.73759656009761	0.460938	5.60167440152636	0.433018	4.93839503864136	0.460638	5.61840365903079	0.444755	4.62631552852027	0.46	5.7716536346703
Creb1	chr1	+	0.490625	4.32608691237638	0.492728	5.42814815349863	0.563636	1.17659832091826	0.496212	5.10587894319786	0.481545	3.74677349062453	0.52169	5.79458545288541	0.517857	3.27800128703429	0.466877	5.56688152419494	0.505865	3.7398510561236	0.487374	5.33101263839742	0.506934	3.41390817119316	0.521681	5.89374777247186
Creg1	chr1	+	0.471429	6.82570564350376	0.476151	8.51799606130832	0.465462	9.44587507305267	0.462238	7.29993887091539	0.518344	7.56175486713158	0.486038	7.11574765920174	0.472454	7.27226462922622	0.443235	7.70085696644686	0.492647	7.46098576978982	0.464261	8.16505364816961	0.494513	8.61673714775571	0.453982	10.1349496494401
Cryga	chr1	-	NA	0.0214421023140789	NA	0.0395139327280606	0.708333	0.0742426607150477	0.571429	0.0399320409293812	NA	0.0199242168981357	NA	0.0593907913086179	NA	0.068203649212755	NA	0.0773820477952331	0.615385	0.032600794332307	NA	0.0513322185312388	0.384615	0.0857332606404446	NA	0.0489079935684423
Crygc	chr1	-	0.897321	2.29015838329125	0.912409	2.62395638516682	0.89022	4.73478003321835	0.965251	2.70735173171339	0.932624	2.42411305593985	0.937086	2.37185361218514	0.923913	2.26456073197185	0.977778	1.63501572361238	0.904762	2.1346054456898	0.992126	1.9705650642272	0.913223	2.00655097040918	0.926136	1.72609127428574
Crygd	chr1	-	0.981618	5.74035114577592	0.988764	5.61190095165063	0.952012	15.3945190253109	0.96319	6.19587566968964	0.94958	6.93277469305754	0.975078	6.34021732248258	0.952479	7.71288397870214	0.969945	6.15443212815005	0.966581	6.16957347604929	0.971061	5.382725729837	0.969529	6.14894290566146	0.961326	4.48021960538931
Cryge	chr1	-	NA	1.12578451430489	NA	0.638344030793565	0.7	2.72360005214216	NA	0.887010480395383	NA	1.10644164378997	NA	1.05939590397899	NA	1.2395517989704	NA	0.761779702880458	NA	1.02040937170139	NA	0.673779742546965	0.935484	1.03875983846514	NA	0.765413481641667
Cspp1	chr1	+	0.563974	2.58604971223751	0.594974	2.38774188488159	0.543651	0.759556600649932	0.598943	2.89212123131759	0.543666	2.30354957973433	0.574901	2.58440563930114	0.532353	2.05219041474179	0.548344	2.65017973807004	0.533	2.69806722079089	0.566009	2.66852671393809	0.543217	2.59639953801694	0.617647	3.22084200452394
Csrp1	chr1	+	0.556475	43.3971269018161	0.59057	57.5797391338447	0.573059	61.4843858959531	0.570329	53.7404426900227	0.584483	45.7309671596014	0.590875	51.5194872342101	0.565338	49.4641212540188	0.549213	53.5575948744732	0.566266	44.3424970905869	0.587134	52.0834814704792	0.59009	45.8318790670768	0.592815	52.0210023615257
Ctdsp1	chr1	+	0.491613	13.0189062067687	0.464646	16.9878503435601	0.465394	18.4070878292124	0.443902	16.4113022800982	0.484146	13.3362572501646	0.480885	15.4617351926038	0.517274	14.1981320416885	0.45782	15.9266830225222	0.490662	14.6474762681532	0.511489	15.4093654087042	0.48566	13.1740700935059	0.485215	14.933294490933
Cul3	chr1	-	0.479659	44.9281346396317	0.504132	47.7990467779058	0.451613	16.7718634560954	0.564261	45.0416295074443	0.500916	42.2491118081205	0.518736	48.4740415401691	0.495767	37.6607870364656	0.495854	46.3949681049834	0.503673	39.9443022154885	0.505224	44.231876118188	0.537197	39.1180477403707	0.520388	49.9605241010757
Cxcr4	chr1	-	0.25	0.709913852057943	0.555556	0.590304935279268	0.266667	0.689454797237638	NA	0.596551120300103	0.733333	0.876863904084435	0.282051	0.631465142840707	0.5625	0.860561807337374	0.68	0.617066191420228	0.55102	0.710798292355942	0.644444	0.711590986608378	0.375	0.540005736821561	0.75	0.493678585522164
Cyb5r1	chr1	+	0.66	5.5985778570844	0.695402	7.62248430702395	0.740576	6.75479371288203	0.680328	6.88519463435064	0.676768	5.74640998926646	0.739617	7.55321830686049	0.722987	6.35964058590716	0.693093	6.88128187701738	0.701425	5.86248541577743	0.684133	7.40948624424768	0.742736	6.02861140102321	0.726606	8.62597237929237
Cyp20a1	chr1	+	0.614433	11.7498218402451	0.61503	11.6907483949957	0.629172	6.6067090961183	0.648254	12.114116528664	0.614192	12.1841902942908	0.615917	11.8787644669425	0.607811	11.347285172829	0.629544	12.0774048021617	0.607937	11.2486288458102	0.611309	12.5454804368385	0.627922	10.2173344688715	0.616253	12.9707807177479
Cyp27a1	chr1	+	NA	0.518636400196956	0.428571	0.58407156890258	0.666667	0.448940893601347	NA	0.476225881585326	NA	0.394908431570504	NA	0.452240969559717	NA	0.400967150802091	0.5	0.597903627465239	NA	0.301178530244392	0.571429	0.626553862330214	0.555556	0.29377351989358	NA	0.722929016759488
D130058E05Rik	chr1	+	0.404878	1.06502087516184	0.447005	0.825630504744806	0.506823	2.15701198860805	0.52381	0.581672810790103	0.470588	1.21324598481778	0.591133	0.869847463588874	0.453744	1.44545107077899	0.539216	0.97474295239612	0.511879	1.39350533052096	0.483412	0.829453872439676	0.450801	1.43309441240652	0.597561	0.630668337084723
D1Ertd622e	chr1	-	0.53125	0.33294825747447	0.563492	0.442198619682394	0.575893	0.200224979700812	0.523132	0.385506922577001	0.491935	0.304803296841144	0.542522	0.41756365566755	0.512367	0.327414321500903	0.558739	0.440507849638712	0.527344	0.287951067933696	0.524934	0.414406674673472	0.476923	0.288361179046962	0.50211	0.416435161576617
D1Pas1	chr1	+	0.470778	29.3854265804308	0.458824	31.0319078504121	0.48203	12.1038034741502	0.461847	34.6591964339334	0.429967	28.2018233730885	0.446064	31.6165977670953	0.479029	26.614924022341	0.45295	31.6079284999961	0.463525	27.5921268394344	0.473304	30.289897737865	0.47651	24.5742700726656	0.483727	27.332899132909
D230017M19Rik	chr1	+	NA	0.108556922868467	0.434783	0.275745776094788	NA	0.0948153692605795	NA	0.139331760431196	NA	0.0899670824884891	0.846154	0.257341541846464	NA	0.114322611637312	0.419355	0.254120614315367	NA	0.0936776339483162	0.75	0.323099512329709	NA	0.0961948075339646	0.8	0.431646275008455
D2hgdh	chr1	+	0.677419	1.667284984422	0.614286	1.45202857442533	0.690476	1.71330995738736	0.678392	1.57634086822256	0.505747	1.76669767216359	0.701149	1.61362786881797	0.554502	1.70090915652342	0.646154	1.62301660161971	0.567944	1.85674507687529	0.620209	1.60183860630418	0.64794	1.77770849813852	0.813187	1.63043781876203
D430013B06Rik	chr1	-	0.606557	1.15388749311982	0.609023	1.1017252771053	NA	0.00965048830519672	0.554974	1.4715341044409	0.625	0.823576871569307	0.585526	1.31239266406686	0.444444	0.644965331297433	0.514085	1.25983512910215	0.546448	1.09331082702043	0.525547	1.24107703564309	0.685393	1.30386000557343	0.641026	1.90720274064973
D630023F18Rik	chr1	-	0.683351	1.97786711296833	0.66221	2.04414596868786	0.523555	1.80182975348681	0.621395	2.01112551092407	0.626601	1.79422541148304	0.651104	2.06453703120434	0.587734	1.79683498418118	0.618083	2.04393639180172	0.659636	1.52589319703858	0.617494	2.10756577771678	0.633831	1.49247237533354	0.645729	2.07496793110958
D930019O06Rik	chr1	+	1	0.24784564891567	1	0.41736119499008	NA	0.069047228365437	1	0.326280640190112	1	0.19059365550387	1	0.370861415924776	1	0.183496304393039	1	0.424090802481382	1	0.224147148582897	1	0.504680397680866	1	0.228949701224359	0.947368	0.428862886546101
Dars	chr1	-	0.509755	73.9356456123861	0.512764	63.931965498129	0.437811	24.5284144958837	0.485183	63.1703262992348	0.488384	71.1147328994487	0.490165	66.704253482957	0.475931	68.3794402842975	0.460236	68.589028754747	0.481555	68.6407181236235	0.493621	66.4897895063488	0.507598	67.7179051338883	0.510049	66.3918718016107
Dars2	chr1	-	0.454545	8.17437328431377	0.47619	6.38258401150359	0.7	7.30626859278088	0.4	6.85974044781578	0.8	8.19485533944477	0.909091	6.65142565760674	0.263158	7.96187344676655	NA	7.01082097799093	0.5	8.03287965140352	0.5	7.28532140964049	0.384615	7.37289538474014	NA	7.59071830497238
Dbi	chr1	-	0.623428	48.8074723011651	0.585416	54.5258926556327	0.611462	131.554479311803	0.577743	53.0938887378207	0.631502	54.384004719123	0.57386	54.5243939570175	0.59752	58.9358428637693	0.568533	53.5889727196285	0.624413	46.7268881690119	0.593771	52.8181575060214	0.603156	48.6686377776573	0.562841	54.6715357781693
Dcaf6	chr1	-	0.552187	5.29961051512744	0.500146	6.48836736273268	0.523245	3.00907753655686	0.554831	6.3823199508153	0.53184	5.04897769123212	0.526641	6.31477087891252	0.5558	4.91957572020412	0.526788	6.35324199227908	0.577123	5.03459994290969	0.514379	6.53319144943039	0.564217	4.7932686630794	0.514049	6.63870435426186
Dcaf8	chr1	+	0.509427	9.04645200455246	0.501071	9.43416427164156	0.503884	6.04692646713434	0.497111	9.87380857532543	0.509801	8.88058037806218	0.521575	9.30979748974292	0.501961	8.43124054583168	0.499704	9.29962993369251	0.519405	8.92812989535465	0.502719	9.53056077864233	0.508735	9.09403226047963	0.493755	9.51361331648866
Ddr2	chr1	-	0.7	0.587991329001359	0.692308	0.46082526899176	0.46875	0.364668451864247	0.584416	0.67652567183359	0.527778	0.491416701106977	0.65	0.589676703860824	0.527273	0.532067975885773	0.8	0.501534067869741	0.5	0.653793024074662	0.59375	0.550114708093845	0.41791	0.685033184275366	0.863636	0.464398926408466
Ddx18	chr1	-	0.445702	80.5898349849877	0.442163	65.3285616223365	0.383071	100.798390351561	0.449724	67.4638402885634	0.431593	85.7919286765082	0.438129	69.348655291018	0.432998	90.9550461398354	0.447444	68.9901626079349	0.441507	81.7423231405755	0.45386	67.489773390391	0.451103	79.3116564195702	0.441806	58.6587662612147
Ddx59	chr1	+	0.44586	6.90670954965414	0.413437	5.99760749318365	0.484581	5.34079526437439	0.440402	6.05119844073444	0.410156	6.76256124444038	0.405542	6.19570848985196	0.409701	7.08556925655672	0.380606	6.64265789052933	0.427201	6.92278364441577	0.46797	6.80587920986986	0.449367	7.2016519589925	0.4363	6.24467132916131
Dedd	chr1	+	0.550179	4.61757008663384	0.571429	4.85264263760509	0.614476	5.3386481545628	0.599269	5.0631456912234	0.574184	4.6579698406406	0.61104	5.14355395489605	0.536585	4.51079688523123	0.506699	5.14915408552472	0.51774	4.38736828894765	0.557279	5.12122302367706	0.624324	4.3823577924914	0.509769	4.87327559187346
Degs1	chr1	-	0.556711	61.052310602022	0.537482	79.3214367432749	0.546366	51.1431929669058	0.557231	73.2303696328907	0.538564	59.8010259782181	0.528329	77.3958359378386	0.542698	62.8219179999318	0.544145	73.9032155365267	0.54963	58.9545290806624	0.527049	74.1495976916451	0.56554	58.734993245277	0.526565	76.462768470567
Dennd1b	chr1	+	0.419177	2.35258795798756	0.453076	3.49417749205892	0.586207	0.605975880248902	0.465624	3.20522114595057	0.409651	2.02192612064892	0.432884	3.49379916801707	0.48133	1.7040457549664	0.43694	3.28315506165018	0.421919	2.12320903916243	0.439943	3.31514406580997	0.401271	2.09542019362312	0.410739	4.13356713366919
Des	chr1	+	0.8125	0.383604579492151	1	0.384192473248325	0.916667	0.563049693808579	NA	0.302841024309931	0.861111	0.329328092309356	1	0.361871434878118	0.914894	0.391253485827565	0.818182	0.32728648478125	0.885246	0.399390125557486	0.954545	0.319424780205045	0.964286	0.53015767514845	0.793651	0.832178500049082
Desi2	chr1	+	0.488575	5.36118130030302	0.487562	4.97450030992285	0.414634	1.88431159594785	0.513026	5.37894098947557	0.444444	5.3946841008989	0.463862	5.29392752496892	0.472944	4.99327661090181	0.466601	5.41999717795128	0.447858	5.30633473017317	0.450409	5.23180109178424	0.481323	4.55103534317582	0.484076	4.60713192582063
Dgkd	chr1	+	0.563514	15.0631864338274	0.502336	18.9178000335756	0.520231	9.06977968103677	0.510273	17.7881211229071	0.532524	14.485225635873	0.531113	19.5763319398271	0.52159	13.4193169010373	0.526173	18.9052250418274	0.514242	14.8975635694541	0.536676	18.9113138697255	0.524043	13.2114328856701	0.501142	17.3432386098196
Dhx9	chr1	-	0.547001	90.9563575060988	0.534142	78.500436954915	0.520389	23.8900867904781	0.545688	77.2608271567495	0.560687	87.9087446921616	0.54243	82.6246939882831	0.546012	76.7853913083263	0.543235	79.5435758547679	0.549787	92.8288352809274	0.553735	77.4723432120362	0.55223	85.0111835686338	0.52693	80.5349335581021
Diexf	chr1	-	0.481693	7.58426532264536	0.469428	6.36316518670491	0.519793	6.28565121774117	0.503589	6.73628458293697	0.516367	7.62203510942679	0.437856	7.03776329473332	0.528746	7.19953229884763	0.538223	6.98974380881168	0.457511	7.38739990527688	0.480283	6.69684996767957	0.5	6.78182914506897	0.442029	5.78735852531443
Dis3l2	chr1	+	0.544669	2.0944171458184	0.510949	2.5568857244558	0.579365	2.12501996072045	0.544469	2.80500044162352	0.603448	1.87262120802633	0.536986	2.41106195251872	0.522124	2.11438208782919	0.548387	2.48459750024027	0.576233	1.87292497401867	0.526767	2.59471552285923	0.505102	1.92234755927887	0.515464	2.43474003259325
Disp1	chr1	-	0.404891	1.75583892188297	0.502555	1.94914726736101	0.409962	1.4178680673822	0.464396	2.26830656309135	0.420039	1.75961652146323	0.425139	1.83966689897707	0.434077	1.69885707210695	0.406998	1.90585140207775	0.395604	1.85869459876231	0.437107	1.92001232649482	0.417822	1.63651402843489	0.399425	1.70859663595726
Dnah7a	chr1	-	NA	0.0870481838285194	NA	0.1253941399293	1	0.0622614099414462	NA	0.0684978222255383	NA	0.066075925704321	NA	0.139231329511	0.9	0.0711712318192941	0.826087	0.118358105923194	1	0.0829511086304531	1	0.116425937281238	NA	0.0843163484453217	NA	0.127240464194863
Dnajb2	chr1	+	0.546485	3.4665152606755	0.48125	3.90350041482783	0.468085	4.83849909487869	0.456265	3.6978254046796	0.479125	3.62504456517811	0.479263	3.68011378544167	0.462247	3.70280484829332	0.536204	4.02827374719407	0.511712	3.63503843982516	0.54717	4.00388888341331	0.531373	3.53800525306175	0.479624	3.52911057380194
Dner	chr1	-	0.818182	0.346820626476468	0.857143	0.62706893242357	0.911111	0.13216973113639	0.924528	0.594097619805331	NA	0.304027557183091	0.90625	0.580003714452055	0.857143	0.351247367784124	0.9	0.572682149287255	0.772727	0.330812199176807	0.857143	0.506526532078737	NA	0.306123653482457	0.904348	0.809731946193243
Dnpep	chr1	-	0.481923	18.1015537558444	0.50974	18.7402818114061	0.511765	32.4879582443047	0.498306	18.7176903066558	0.49691	19.8179296324259	0.536516	18.9769894889717	0.496582	20.462804228105	0.530137	18.5146337123685	0.514438	18.6160492979645	0.536236	18.5222059685113	0.52266	18.5785914750786	0.525621	16.4779115146127
Dsel	chr1	-	0.453189	3.28101743964034	0.479964	4.18687930777834	0.466019	0.485890280519847	0.481838	3.62672731959872	0.459337	2.79889784387016	0.468191	4.10757966333315	0.44183	2.39310426987874	0.553903	4.06782775977197	0.494585	2.68214083302939	0.487002	4.1115952076028	0.46505	2.34355430882037	0.492665	4.2313094765382
Dst	chr1	+	0.666129	6.94454867479339	0.656577	7.95363986933697	0.702027	1.0017130843356	0.642682	9.58660400782855	0.651982	4.95830244803636	0.660772	8.65089218898189	0.66394	3.79948243639367	0.657102	8.51833980149476	0.661496	7.14839573523214	0.650886	8.94233137340305	0.654159	7.27753051778675	0.644081	10.4984551622671
Dstyk	chr1	+	0.549587	2.80727483565855	0.490731	3.48796608960698	0.55814	0.864138491811207	0.520612	3.43909094071581	0.558496	2.70348916736277	0.563291	3.51976500600829	0.51148	2.41484343757595	0.533193	3.36092301328295	0.564717	3.05472408188012	0.533333	3.57950445141644	0.596717	2.64539172880387	0.478754	3.23789758383693
Dtl	chr1	-	0.549001	9.23818486913303	0.555319	7.31071166842673	0.552403	3.4183720471522	0.546906	9.97054330294288	0.542397	8.35504718747959	0.538976	7.72608821298972	0.572843	7.70945264770984	0.56138	7.9372480693606	0.545764	8.58009198124022	0.555733	7.90870886525497	0.554189	8.52883657420595	0.573018	7.67367453687893
Dtymk	chr1	-	0.495168	52.2233770818998	0.533597	42.5003059524282	0.489998	103.374886311603	0.524894	45.1493115753237	0.509051	60.1191094261022	0.509199	43.7837220562936	0.488861	65.5569665538803	0.517284	44.6049711649774	0.504944	58.8858817580474	0.523428	46.4026866672696	0.501975	58.1084464604747	0.524157	42.4742966569874
Dusp10	chr1	+	0.466667	0.807849883700387	0.377049	0.952971622154558	0.522388	0.68295763390623	0.844444	0.646828177776219	0.578431	0.851069278022274	0.638298	0.945397792395675	0.483051	0.756977549817765	0.637363	0.923840407890657	0.666667	0.700188329290362	0.664474	0.95672770655034	0.628319	0.888785045219283	0.573333	0.997613741262935
Dusp12	chr1	-	0.518544	14.7454124816235	0.520652	14.2701045934175	0.382907	19.8637235682472	0.498995	14.3095151189685	0.469179	15.7059195151888	0.507066	13.6878127777915	0.488095	16.6900023621304	0.489996	13.9059884341319	0.488061	15.9466969695332	0.485215	14.672069257332	0.466237	15.2230765565047	0.507047	12.469309596119
Dusp23	chr1	-	NA	0.266429526626001	NA	0.245490816097738	0.75	0.679065849424396	NA	0.258425442184825	NA	0.330091990596064	NA	0.245987390952006	NA	0.247177764168211	NA	0.250394037635284	0.727273	0.329129295971908	0.818182	0.3189150598111	NA	0.275197686282732	NA	0.139266378849146
Dusp27	chr1	-	0.774827	10.8900354704112	0.774852	8.86940917754949	0.796091	10.5297814999493	0.81483	9.66520089202687	0.765568	11.44463946094	0.76897	9.37633279002632	0.757179	11.7677825084028	0.747248	9.40667754505636	0.760159	12.854407053463	0.764103	9.37507095126346	0.760372	12.4119486428309	0.755855	7.543535589873
Dusp28	chr1	+	0.875	1.08401739476732	0.954545	0.987848318201515	0.795918	2.85971730161665	0.90625	0.865194220136592	0.901163	1.5607303236873	0.75	1.12182605805167	0.825203	1.5724730235163	0.801802	1.06400315718445	0.820896	1.52137040217433	0.846154	1.13121000096619	0.761682	1.49556910228331	0.786667	0.815133226140706
Dyrk3	chr1	-	0.509105	18.9182359790797	0.505421	15.3393136584671	0.458067	13.5976048284233	0.501275	14.9054070335049	0.484807	17.9497257496465	0.47936	15.6386406394531	0.488967	18.3064989920472	0.517756	14.6599169480669	0.49069	19.0321242041402	0.527994	15.7373576871542	0.528958	20.9772940657543	0.509322	15.2899807583557
E330020D12Rik	chr1	-	1	2.17646245351564	1	3.85316996386027	1	3.71267408414704	1	4.09150640620109	NA	2.01603105920314	NA	2.99524874050546	1	2.05185027326654	0.972973	3.26657470453489	1	1.77422731376065	1	3.32615717715097	1	2.07979068663396	NA	3.86377426234295
Ecel1	chr1	-	NA	0.107333037869332	NA	0.251365060625791	NA	0.170333875869095	NA	0.204052729149138	NA	0.228559230988614	0.677419	0.231228147494886	NA	0.209823655113811	NA	0.165431763607952	NA	0.231186204379389	NA	0.182009380563621	NA	0.236035914151807	NA	0.219317416873344
Edem3	chr1	+	0.542198	10.4523276149525	0.479456	11.5385204044058	0.545894	1.09566390213697	0.505405	11.6857384906865	0.522282	8.95793541123046	0.509848	11.9672615123313	0.525034	7.39300408544621	0.51825	11.9112690918657	0.53996	9.47318490063685	0.505899	11.1969289922708	0.514957	9.35885824028709	0.512625	12.5415930631679
Eef1b2	chr1	+	0.453752	420.620880038881	0.456849	429.846589846776	0.436274	930.876588641705	0.452962	392.799201053648	0.445587	465.676713521032	0.454897	409.614909980203	0.449908	517.211208555086	0.453037	404.485697704918	0.451077	436.67386328428	0.451053	416.593188067995	0.440064	449.486889655956	0.450117	421.002983293948
Efcab2	chr1	+	0.40625	1.04075036719841	0.375	1.24386547568674	0.393939	1.00534328084626	0.534392	1.07795346816232	0.493976	0.970579595030601	0.564103	1.21504793236141	0.476684	1.03751371465657	0.728571	1.00702920305914	0.405797	1.02624567463324	0.52349	1.07425435408545	0.557252	0.880505990754862	0.407216	1.43637039169569
Efhd1	chr1	+	0.875	0.508253502851836	0.61	0.760155091728526	0.586207	0.5866043639556	0.5	0.72018610287931	0.714286	0.650232678534453	0.449275	0.686883614617161	0.673469	0.69118380508079	0.473684	0.584826205925385	0.648485	0.655160904452316	0.913043	0.599560312444869	0.691176	0.848214621978685	0.712329	1.03328205706128
Eif2d	chr1	+	0.517403	14.1116599151502	0.528832	11.3205756116023	0.49969	15.8338364897834	0.542534	11.7645186165259	0.516657	14.7162795039603	0.516507	11.7648373458418	0.512119	14.5149417240897	0.512658	11.4429463985238	0.517343	14.3569273825204	0.520497	11.7777067298085	0.519254	14.9359338506631	0.527473	11.0778528855106
Eif4e2	chr1	+	0.532177	32.8316997450833	0.545371	28.3334451707203	0.528674	47.1029096513199	0.51618	30.1807824778599	0.525424	34.4575205974771	0.534326	29.7285621804232	0.535115	36.8334503529087	0.50879	30.2129313441728	0.512016	35.174091525592	0.525141	29.6101381462869	0.525351	35.3539631763327	0.514444	26.6092560045992
Elf3	chr1	-	0.63068	53.6302087053461	0.596624	87.2315959593848	0.640993	92.7079970225862	0.633276	51.3846295196102	0.633303	55.4364149463916	0.631098	71.724270040771	0.641014	60.6413350312681	0.639271	74.4076207956885	0.648915	50.0446456109009	0.613787	77.1085404085896	0.621013	58.3903444769273	0.581142	90.2555437377829
Elk4	chr1	+	0.442308	3.21263401223662	0.471376	3.77278807664489	0.544643	2.00479518188082	0.436725	3.9082542384247	0.497881	2.43584202499465	0.470588	3.88643376515616	0.47619	2.03016832378454	0.431243	3.83087635865944	0.422872	2.8267081747193	0.441572	3.87767760994759	0.478064	2.95978459826127	0.497653	4.30752172479106
Enah	chr1	-	0.551821	18.1780989797675	0.57516	20.1030079905433	0.539128	11.167696940951	0.562935	17.7114572849009	0.550102	17.4384265706059	0.572738	20.2467448979445	0.548363	16.6184635871345	0.55664	19.1162191151282	0.548829	18.3381747682508	0.549379	18.7595505337	0.542397	17.6080179249775	0.566322	22.8185588033141
Epb41l5	chr1	-	0.545817	2.59641513208778	0.573398	3.17027152635773	0.704854	0.949925067576009	0.565693	3.3667732448716	0.529774	2.25295667944647	0.598962	3.2755884662996	0.560636	1.96853810817313	0.56391	3.29371825811713	0.572254	2.31970843829295	0.574966	3.18745784301646	0.572954	2.26626736515552	0.6	3.21756138742382
Epha4	chr1	-	0.426953	15.0502579381382	0.431445	19.0910334538188	0.441536	3.48125009865576	0.406897	19.1247405162305	0.423745	14.0462513154458	0.446128	19.6679578834387	0.405189	12.5816213377191	0.427653	19.0371222940892	0.42583	16.7364236828503	0.427073	18.6509610065961	0.450116	16.4878877168654	0.441979	22.0361055749901
Ephx1	chr1	-	0.498708	6.34939135344541	0.434783	8.52041970948457	0.497653	7.92112080090547	0.447635	9.12631436963727	0.428094	5.35542515127634	0.553922	7.09247875489121	0.5	5.91080805062027	0.502693	8.77750520606544	0.575835	5.34552716913428	0.481928	9.26243816020598	0.600639	5.167297499011	0.378132	9.12710943565334
Eprs	chr1	+	0.486801	38.0812305665553	0.488789	30.0657763993219	0.513365	25.1285280912837	0.479953	31.9475519168343	0.490478	36.0330706352928	0.49148	31.6147201994168	0.489475	35.9621467696079	0.482316	31.9150397894748	0.487814	37.9394220348278	0.484668	31.6859664994066	0.482032	36.4441188432204	0.485519	28.7326762083029
Ercc5	chr1	+	0.518879	5.13571990828275	0.571724	5.46749785912086	0.581538	3.23482261471601	0.532039	6.09951029687176	0.55901	4.6357441693911	0.517344	5.21239269218626	0.5625	4.56792312275194	0.553831	5.72691814672821	0.519593	4.60630766439853	0.536554	5.97276857412251	0.543754	4.23710031824817	0.568717	5.54051502856689
Etnk2	chr1	+	0.513725	2.46138053151583	0.486364	1.91732574804325	0.497512	3.99613912579973	0.438596	1.99187946607005	0.457516	2.92422573633742	0.511194	2.12376925877503	0.526946	3.0886200299703	0.460784	2.44030541330598	0.537975	2.6686099188881	0.416422	2.51129894338767	0.48855	3.09773835752531	0.462766	2.4278866321049
Exo1	chr1	+	0.526654	14.0655302930958	0.540166	14.1982493387138	0.463638	9.99384493303756	0.539957	14.8451700532729	0.506526	13.5067595895314	0.543287	14.3590977368589	0.495574	13.5053672212507	0.535549	13.7382307004878	0.505197	13.4096605008185	0.532069	13.9472640560228	0.510364	13.0372376752963	0.530668	14.0339867343956
Eya1	chr1	-	0.190789	1.48749092462141	0.294798	0.855232717901972	0.170455	0.444238871491679	0.315412	1.19282140960095	0.174041	1.38777988730163	0.196507	1.0124375374592	0.149296	1.26575945045777	0.351464	1.13223771136865	0.154023	1.55751464008459	0.212121	1.14222075404936	0.152941	1.87563468014866	0.240437	1.16601216736239
F11r	chr1	+	0.59168	12.9606759255941	0.636503	11.1513719236887	0.567145	15.3249899243164	0.617898	12.7580846426329	0.602203	14.2115107132305	0.586806	11.0925256637145	0.583673	15.4619696080482	0.618605	11.0251983174419	0.559596	15.3354724161451	0.603604	12.3688864682463	0.589483	17.588743429296	0.601739	13.2394103881528
Fam117b	chr1	+	0.534688	9.8103353628682	0.518887	12.6261920870681	0.538714	4.25250554295958	0.555383	10.5345270418069	0.501575	8.61108802422747	0.516822	12.2473207752349	0.520661	7.59977171233058	0.498167	13.0025192903008	0.514306	8.65759036976312	0.502621	13.3235624987749	0.531476	8.95767920866051	0.522496	15.4467410907892
Fam126b	chr1	-	0.498749	2.52580877844584	0.516596	2.32131638517135	0.6	0.286566846150627	0.54146	2.76348891672192	0.500911	2.05227211130727	0.50942	2.57445590262712	0.49543	1.66327465027459	0.522284	2.54390027858023	0.493342	2.26008438442529	0.509975	2.56642619139573	0.49628	2.17782845545161	0.51059	3.06443653248727
Fam129a	chr1	+	0.935296	6.65559369308306	0.886294	7.29141819756963	0.928161	2.38673052230963	0.873313	7.64506498776919	0.932547	5.86714192482351	0.879135	7.605776802762	0.942968	5.43593712165575	0.882867	7.13191433797319	0.945047	6.08508403803473	0.902083	7.02228922858446	0.9445	6.71477302382465	0.891444	7.27844386399955
Fam132b	chr1	+	0.368056	0.917478232231189	0.409639	0.92222571233875	0.389831	0.782954572324706	0.305389	1.12355854416044	0.459302	1.12120610971001	0.383648	0.862485097227816	0.416058	1.07448004741124	0.471831	0.948170615835551	0.336918	1.16667993642508	0.385542	1.05606390143486	0.479167	0.969349278743897	0.491525	1.17318375336024
Fam134a	chr1	+	0.561873	6.97300885124202	0.467368	9.71444568202704	0.547684	11.204477572401	0.545113	11.0419616211795	0.498623	7.71124993453356	0.541475	9.11246304836673	0.527415	7.75717012974379	0.523385	9.55922446046648	0.519582	7.0943415795766	0.542094	9.34626362347369	0.5	6.50269200778948	0.505338	8.88701785767083
Fam135a	chr1	-	0.469504	4.43423668928203	0.501783	5.83174913880966	0.333333	0.441590850429997	0.443387	5.87845569721699	0.50253	3.71242014896538	0.481516	5.84540473211695	0.502636	3.04733781840561	0.508803	5.67941224198398	0.479419	3.96030658076066	0.512103	5.80591848080779	0.526405	3.28184230503576	0.469751	5.95506573689495
Fam163a	chr1	-	0.107143	0.701590890245826	0.103175	0.761625455017294	0.0660377	0.656173541765401	0.190955	0.750911640351578	0.030303	0.779313007164587	0.157534	0.774334342460978	0.0508475	0.644482318971377	0.186992	0.651179300966197	0.025	0.75098558298984	0.157534	0.688572830066127	0.128205	0.670671730842097	0.333333	0.533427214757303
Fam168b	chr1	-	0.544083	24.4013507246527	0.544932	29.5084053247048	0.536091	14.026111048648	0.548485	32.5798475112069	0.557126	23.1867644668552	0.541879	29.7397765866913	0.549943	22.5236703444452	0.54459	27.424552103632	0.537002	23.9467794880936	0.538171	27.7938538210635	0.535441	22.8372116768488	0.536277	28.3761948352148
Fam174a	chr1	+	0.360515	0.786863688160609	0.361798	1.18041102318704	0.424242	0.540395270348	0.346437	1.12326491949567	0.351648	0.951718669656483	0.39738	1.06271764921569	0.411765	0.912723222145556	0.305085	1.12355872159686	0.518717	0.793450782705599	0.361446	1.16761070402381	0.358306	0.696836523128233	0.324324	1.16438411775637
Fam178b	chr1	-	0.650636	5.95196463263125	0.646774	8.58121228088356	0.620892	8.07010739904162	0.600488	9.48986830368919	0.627577	5.94553622246814	0.603774	7.85106543120371	0.609442	6.14944626538326	0.640306	8.46005314543762	0.658849	6.04289958893202	0.612928	8.50865046331439	0.624277	4.95188863307937	0.581492	7.07341439270739
Fam20b	chr1	-	0.503996	7.36231819763626	0.529745	7.97600221343777	0.501689	3.50396575787519	0.502746	8.31799893623909	0.517051	7.1181025560505	0.510989	7.92622141854619	0.494409	6.48757077544462	0.4927	8.17221042102023	0.509124	7.22369664700102	0.506204	8.20378990802557	0.526301	6.70668716025309	0.519045	7.69422562444469
Fam72a	chr1	+	0.512605	4.96515317619713	0.519288	4.42354058399758	0.484642	6.99211572935389	0.426768	5.02248844322876	0.416667	5.01861105510869	0.538259	4.74249880330964	0.445328	5.4083532698421	0.532033	4.47321919831367	0.438326	4.74668160654919	0.582915	4.5322764376395	0.589431	5.21020315873869	0.479866	4.63599116579733
Farp2	chr1	+	0.382979	0.735543979668057	0.340909	0.655697294381399	0.538462	0.265723015523262	0.47619	0.896506737426967	0.4	0.527887083814981	0.409091	0.731559922231909	NA	0.335253181158972	0.5625	0.79311055863481	0.452055	0.584167624134109	0.586957	0.737281664061861	0.517241	0.494943763720251	0.625	0.685412597545133
Farsb	chr1	-	0.496381	72.1220660950224	0.511819	56.4847897934198	0.496794	90.8043469768725	0.502818	60.7373963154386	0.527123	73.9224949302939	0.52093	59.8038066588634	0.509655	78.0513320256619	0.50707	60.9573389615355	0.50923	71.6546172694637	0.519677	59.374396717465	0.511841	70.4156065544309	0.512186	50.3518994090985
Fastkd2	chr1	+	0.5	9.94920119105621	0.536804	8.16289358447928	0.468051	8.81907072121746	0.544828	7.88197158640828	0.502776	10.2899946338465	0.508026	8.28767666400025	0.495069	10.3659269223011	0.548336	8.67339706581416	0.494776	9.83469322773569	0.523705	8.43285884146342	0.503931	9.34356780837145	0.562572	8.1764538541078
Fbxo28	chr1	-	0.518261	8.54454471661767	0.497512	9.41346259536873	0.466321	7.06254600021351	0.514144	9.2444777228287	0.538801	8.11198118531506	0.504213	9.47326676108466	0.509579	7.59983977836993	0.467699	9.34223073640701	0.521864	7.51369228831869	0.522816	8.83847881303294	0.532186	7.30122374538778	0.537004	9.69777089094
Fbxo36	chr1	+	0.677966	0.612118116340463	0.793478	0.778873329472107	0.816667	1.20269884420295	0.723077	0.80747122801102	0.730769	0.663584020899734	0.709677	0.827544871446431	0.737705	0.822857341409937	0.679245	0.782376453907344	0.763636	0.714622160678155	0.788235	0.761778407532955	0.794326	0.751722640084792	0.701031	0.964043038960824
Fcgr2b	chr1	-	0.115942	3.24679349945118	0.0980392	1.48460465037345	0.123853	2.52108756454598	0.113514	1.98615350726215	0.137387	3.38119810704148	0.0988372	1.88446946630655	0.121572	3.57936638323156	0.141243	1.88540223447202	0.130673	3.89244475472663	0.120548	1.82292913074235	0.115013	3.83726675215392	0.152047	1.62173500608035
Fcgr3	chr1	-	0.121283	32.8653329161387	0.0927055	26.9592683015168	0.103504	34.8098005121043	0.084226	30.5021216671666	0.101401	36.3365610263057	0.0925183	27.1469970111183	0.110169	38.4815321554068	0.0893342	29.5948444141291	0.103866	38.5972935501761	0.0882561	31.14075739561	0.119792	39.2672161678501	0.108846	27.4969417066448
Fh1	chr1	-	0.47979	31.5638871682366	0.477427	31.4133435357143	0.490502	36.3604452272199	0.482916	29.5027383410121	0.464116	33.4158839238312	0.478895	31.3533302147491	0.495721	34.4829064641914	0.506787	32.0539506015709	0.486535	30.8111625785785	0.481709	31.1939576375816	0.476543	28.6726195565251	0.498777	29.5190452867832
Fhl2	chr1	-	NA	0.379560250767932	0.170732	1.02638325523204	NA	0.399978910125349	0.395062	1.01419384922382	NA	0.276019198778601	0.138462	0.761821782732228	0.0909091	0.341198013194014	0.173913	0.670005342665632	NA	0.194453340996339	0.158416	0.763804650364663	NA	0.296925420351988	0.206349	1.19511335891679
Fmn2	chr1	+	0.525026	2.9103074547903	0.50055	2.42067514516476	0.503497	0.708103367020907	0.51865	3.07434074157755	0.569431	2.85777348202758	0.498925	2.56355326839493	0.546177	2.60045691293318	0.50198	2.57783807399264	0.549113	3.20652976163587	0.502752	2.60173523354688	0.55339	3.20631624285132	0.515873	2.47811765150653
Fn1	chr1	-	0.508568	113.096198917101	0.513795	193.61441534967	0.544406	53.1427292264608	0.506596	175.307725522743	0.508399	94.3468535563915	0.509394	176.468533360934	0.510735	88.3136279715842	0.516413	167.137756548881	0.501157	109.841087707228	0.513943	170.313696941576	0.500319	122.539675668347	0.518756	203.616157136532
Fzd5	chr1	-	0.59509	8.40018777034115	0.618666	7.65033165798729	0.651076	2.16318312087748	0.629866	7.52472103153003	0.616151	7.52789642274075	0.590169	7.98974338279961	0.580815	7.0416939000657	0.586134	7.46650035140064	0.614694	9.33530699598836	0.607328	7.31928894319899	0.634645	10.7666593501442	0.630901	8.22481802470078
Fzd7	chr1	+	0.592157	10.3511133856498	0.558892	15.4027611556469	0.639785	4.53635980894518	0.565563	9.64175516941614	0.575965	9.96817539949139	0.539116	14.2476743574464	0.565405	8.7778337326398	0.563569	12.9754941705718	0.583871	7.79282712181705	0.579924	12.6258908470779	0.596315	8.78016795986145	0.528263	14.5348038697389
G0s2	chr1	-	0.381443	2.44405501462887	0.397849	2.18574199636964	0.440217	5.24756104380488	0.408451	2.10846677651233	0.54955	3.03918651789473	0.490385	2.20675542600601	0.463855	3.48692135412627	0.526882	2.0267255629492	0.379085	2.86894475955377	0.46	2.05073489953158	0.446602	2.28497349311972	0.433962	1.59863441664013
Gas5	chr1	+	0.506892	65.8580486128646	0.498257	81.3226686263773	0.509138	95.1669147137901	0.511926	77.5586437085097	0.50265	68.2632815396337	0.5	79.4808321483834	0.494399	69.6875774130136	0.504742	79.373657960197	0.498248	64.3068009052806	0.501088	79.9945275026177	0.500393	65.3849728582154	0.505988	88.5211920559885
Gbx2	chr1	-	0.585366	5.01146351788078	0.536145	2.23924385882445	0.641026	6.85451532046539	0.707006	2.18259694542355	0.567521	6.18666611796132	0.517045	2.61552279837463	0.611797	6.88396317938385	0.59447	2.48452534945673	0.619456	6.10542345119579	0.549587	2.58193749617393	0.552826	7.57807987070256	0.520661	2.1402021163517
Gigyf2	chr1	+	0.513483	11.5964126158885	0.483317	11.9207497880888	0.476667	3.25198103549895	0.490456	12.4036795423983	0.51236	10.1728852484003	0.499208	12.2732195444647	0.508555	8.87219561682572	0.492078	12.9639152771752	0.508065	11.0731363605137	0.499308	12.4723882643308	0.518909	11.0756927474	0.497541	12.7205163772958
Gin1	chr1	+	0.484956	2.06011521373428	0.464844	1.7217438313204	0.48	0.660139354781671	0.438697	1.87009776336606	0.426045	1.94794799138023	0.446809	1.88293423679284	0.421311	1.7802246319194	0.471729	1.97076005653104	0.511799	1.8671339525126	0.475795	1.93930201921342	0.500778	1.93509381779548	0.385638	1.70308663781114
Glb1l	chr1	-	0.553191	0.662689868301336	0.5	0.661900195731772	NA	0.232513847952066	0.375	0.839215288625945	0.666667	0.613314971308066	0.511628	0.736660376756569	0.44	0.558594239636217	0.368421	0.741386850806996	0.390244	0.586400232007789	0.571429	0.772084088492722	0.241379	0.574449143183714	0.583333	0.6257821260057
Gli2	chr1	-	0.492195	11.0883981653843	0.450405	8.53513027179236	0.485054	7.31149879434744	0.493899	8.02282895111464	0.477053	10.5681306701375	0.452996	9.0089435104555	0.491437	10.2799203103905	0.47553	9.65878687566107	0.465048	11.783224648806	0.461214	9.31766827099865	0.468909	11.9722023979513	0.429466	8.0330080017208
Glrx2	chr1	+	0.520243	1.92536488027023	0.613779	1.67704481927234	0.46281	2.56816524074765	0.53542	1.78451429146451	0.543396	2.0344642405186	0.569254	1.8880205271684	0.489264	2.1525707699127	0.544267	1.8240400681418	0.558084	2.04154484115305	0.644385	1.85397554435329	0.550167	1.96631363904808	0.566292	1.90073234010689
Gls	chr1	-	0.505207	6.94949401592751	0.476098	13.1390452652749	0.500652	1.25861287763747	0.456941	9.69840460225056	0.471439	5.74465046570005	0.476151	11.2815287144471	0.476549	4.59297696700918	0.473038	11.5935981560357	0.494332	5.27118707854939	0.483604	11.910140640249	0.470208	4.96459180125731	0.497932	17.7684264035159
Glul	chr1	+	0.539458	30.9851606337851	0.518475	28.2809409462701	0.480117	27.8460992048557	0.521414	25.9704270945369	0.559491	30.6256738833785	0.51149	29.5167288039383	0.542764	30.6890252437612	0.514554	27.1054898895379	0.583097	27.8736301008659	0.519074	25.7071482646859	0.59056	26.9777777475781	0.480503	25.4743973843115
Gm10138	chr1	-	NA	0.0605628144854215	NA	0.0558031797056501	0.304348	0.146152453207369	NA	0.0256334768540699	NA	0.0767394213980254	NA	0.0355829456662021	NA	0.105076322037238	NA	0.0447063009158179	NA	0.0669675128036135	NA	0.039541877799301	NA	0.0484303962675181	NA	0.0376744656753038
Gm10522	chr1	+	0.434783	1.00941969191386	NA	0.198419060302557	0.48855	1.50677065211594	NA	0.300777883526551	0.519608	1.00049378061146	NA	0.285804352557092	0.534351	1.13447944455782	NA	0.400716580263793	0.482609	1.04361786155786	0.333333	0.365166427040798	0.630952	0.968645782300466	NA	0.230241844185057
Gm10535	chr1	+	NA	0.735592996326705	0.666667	0.677782704007553	NA	0.434366896569641	NA	0.461946069112022	1	0.508666346164427	0.833333	0.584388077685162	NA	0.571345323733078	NA	0.571062598620012	0.942857	0.650234422474977	1	0.573350025562033	1	0.60191307798275	NA	0.507253397775429
Gm15443	chr1	-	0.702703	7.27279502026189	0.711111	4.78407712346568	NA	0.705003477359152	1	5.5634585560697	0.648649	6.10166993592664	0.636364	5.23435669252905	0.66	5.35835316025452	0.684211	5.76944505741593	0.672414	6.19633756178258	0.77551	6.13879080069314	1	7.08282196198326	1	6.16091609225884
Gm15455	chr1	-	0.545455	0.667246023125246	NA	0.372268533210395	NA	0.402716348892339	NA	0.421808535589592	0.4	0.540377177116039	0.636364	0.4125844438582	NA	0.501391511958061	NA	0.486020996320471	0.583333	0.67477396951011	0.8	0.46407109309626	0.5	0.50910200608702	NA	0.390957914954619
Gm15675	chr1	-	0.38835	1.04606702894927	0.302198	1.25771527521957	0.238095	0.539861057268707	0.402439	1.54423418263988	0.403974	0.956210854991757	0.369668	1.24062915322575	0.320988	0.791262385121081	0.42246	1.15862851514107	0.471698	0.995648274609605	0.450758	1.28946458576163	0.318408	1.0949448653161	0.279279	1.6973638083044
Gm15832	chr1	-	0.592677	0.905671330274794	0.511858	1.34621294280672	0.587571	0.749451021919731	0.511727	1.20133975754522	0.554455	0.88125507382966	0.572289	1.11228059486828	0.544741	0.964791249644402	0.560461	0.963579675397792	0.541106	0.77293422588633	0.579661	1.04999417890864	0.547101	0.990705855763216	0.550251	1.60779689555646
Gm16236	chr1	-	NA	0.7847017390403	0.818182	0.456651781923233	NA	0	0.409091	1.76902102164726	NA	0.498893979850417	NA	0.648231943834607	NA	0.164210632999047	0.5	0.782497884367363	0.619048	0.753517040503983	0.754098	1.02167819293046	0.783784	0.792636794944902	0.311688	1.5543450726435
Gm16586	chr1	-	0.619048	13.7554335148197	0.599882	18.5526894597501	0.673748	13.111328874864	0.581453	23.0111411010175	0.643046	13.3601685469412	0.600116	19.4825041887855	0.642917	12.8715011852367	0.598978	20.5467656509932	0.649105	12.7196197674645	0.609515	21.1398001578573	0.648616	11.9054271781632	0.587814	26.8515073856075
Gm17971	chr1	+	NA	0.466086392732831	NA	0.411562611975271	NA	0.156898261478037	NA	0.379750736629909	NA	0.46918317211739	NA	0.340674224752081	0.903226	0.44785088518425	NA	0.210256432594988	NA	0.383848062299744	NA	0.573400836446964	0.5	0.419305847946194	NA	0.509407699760637
Gm19705	chr1	+	0.649123	3.78760011415766	0.746988	4.08238779305024	0.682927	5.36869424370538	0.805556	3.68589653790392	0.867925	3.23941167038945	0.797872	4.37819663100073	0.772727	3.45133228750552	0.778947	3.78888929143733	0.813559	3.2688678373511	0.828947	3.8402517872953	0.888889	3.22968968774645	0.921053	4.09047246594087
Gm20045	chr1	-	NA	0.218919366283602	0.7	0.281883057842189	NA	0.100419067119809	0.4	0.444286021098817	NA	0.166910420204573	0.6	0.329096901692784	NA	0.133912490385452	NA	0.273480394843831	NA	0.185626362564535	0.5	0.33819559193703	NA	0.172819314348194	NA	0.345697168095391
Gm20342	chr1	+	NA	0.318852002929728	0.549689	0.611327695848328	0.727273	0.182144031123268	0.553476	0.746753814787409	0.763636	0.323215074125313	0.484496	0.614051086132895	0.5	0.23306421899194	0.503546	0.695940860405328	0.393939	0.381952516313079	0.555938	0.740197916598603	0.404255	0.305199823526817	0.389892	0.837473914560858
Gm2061	chr1	-	NA	0.187084478357899	0	0.261184089926514	NA	0.0654317787299104	NA	0.14253178680154	NA	0.152769167596354	NA	0.183198686216973	NA	0.0991806054289066	NA	0.225055358129562	NA	0.142222588820224	0.272727	0.208105263585536	NA	0.172273860931976	NA	0.290950305817336
Gm21710	chr1	+	0.754717	0.878735938721299	0.752197	1.08696234838456	0.787879	0.940102528527977	0.78	1.22549703667406	0.775	1.01040959470858	0.722523	1.115093443924	0.70947	0.941275048575159	0.800919	1.11500766638556	0.747967	0.860189633587379	0.672282	1.19112853664387	0.737931	1.00752514760332	0.772894	1.60163962531877
Gm21972	chr1	+	0.514326	0	0.501332	0	0.522948	0	0.4956	0	0.497138	0	0.499523	0	0.517502	0	0.492256	0	0.516176	0.015334136509397	0.525959	0	0.509918	0	0.486166	0
Gm23690	chr1	-	NA	1.66518454141251	NA	1.38088584054978	NA	2.49844982335391	0.909091	2.01571844904164	NA	1.39257558532715	0.2	2.76735814821007	NA	0.926916615630792	NA	1.65260064839288	0.5	1.26588190758426	0.181818	1.72745657397679	NA	0.93212119547377	NA	2.08899568273719
Gm23966	chr1	-	NA	1.31658516078036	0.666667	2.83060088187462	NA	1.01303069760719	0.388889	3.13298582805752	NA	1.9030420252238	0.470588	3.2415160863769	NA	2.79188769674642	0.434783	3.29958498192291	0.666667	1.22329148826367	0.75	3.96905191260232	0.785714	3.04152763916942	0.636364	3.67038493789338
Gm25395	chr1	+	0.8	0.80565546194811	NA	0.424193689580651	NA	0	0.454545	1.33963188779634	NA	0.320838492697921	NA	0.743840548007445	NA	0.091523279274469	NA	0.519199401567281	0.363636	0.787453010159034	0.538462	0.964366311377316	NA	0.82833459177606	NA	0.853192755449481
Gm25612	chr1	+	0.75	2.36033300870059	0.357143	1.83143942168154	NA	0.143378683391494	0.47619	2.19784685591475	NA	1.73150932567132	0.1	1.14696501733574	0.772727	2.27210172675031	0.818182	1.7932982504927	0.533333	2.07765379752719	0.684211	2.37920758906694	0.545455	2.38420115304855	NA	1.84181293239888
Gm25663	chr1	+	NA	0	0.7	0	NA	0	NA	0	NA	0	NA	0	NA	0	NA	0	NA	0	0.5	0	NA	0	NA	0
Gm26004	chr1	-	0.904762	0.134937368011013	NA	0.124332633152949	NA	0	NA	0.125648232234691	0.637931	0.250770316131708	0.934783	0.124584131193365	NA	0	0.847826	0.486973231814829	0.745455	0.205160171229174	0.882353	0.10767965381553	NA	0	0.76087	0.153891531486909
Gm26457	chr1	+	0.44186	8.42839560191869	0.507463	13.4980607376817	0.449275	9.26446877298885	0.618182	11.5854113619474	0.38	11.0017438692655	0.582609	11.3020168246699	0.475524	11.1705335729865	0.573248	14.12222372263	0.536842	7.01752995947994	0.542105	13.4516736766477	0.484848	7.06090341479764	0.5125	17.6225533236035
Gm26620	chr1	+	0.764706	0.536446231701067	NA	0.194184136968376	0.842593	0.796041258095248	0.727273	0.481677188933968	NA	0.480668684286726	NA	0.22995455304724	0.904762	0.533232324781484	NA	0.276567416844652	0.809524	0.436938430769599	0.818182	0.382216641450472	NA	0.398339605129899	NA	0.240349564476495
Gm26685	chr1	+	NA	0.301758108196651	NA	0.278042922582275	NA	0.339346088026927	NA	0.172913830223124	NA	0.266017349687912	1	0.321467703820745	NA	0.246113019897732	NA	0.363003279078973	0.8	0.382330126314377	NA	0.259325394656085	NA	0.309368661727754	NA	0.202957294121144
Gm26706	chr1	+	NA	0.104911090410708	NA	0.0966661222904968	NA	0.0968670997711971	NA	0.0781511792987889	0.6	0.155975102795057	NA	0.0774893255679912	NA	0.0333704181805034	NA	0.208236542826984	NA	0.0319015815852334	NA	0.100462518841298	NA	0.167788955140816	NA	0.119647571397329
Gm26788	chr1	-	0.6	0.183302622877362	NA	0.144768737222004	NA	0.0906685777030277	NA	0.106677503737525	NA	0.155118903203177	NA	0.16621638582469	NA	0.132748947103245	0.25	0.183098676454007	NA	0.146812652853666	NA	0.203740173091366	NA	0.143964467365698	NA	0.149321770409715
Gm26901	chr1	-	NA	0.119045919508218	1	0.196112593062638	1	0.158215518801215	NA	0.245215310109095	0.941176	0.157547794831767	1	0.139887966622281	1	0.131958892634496	NA	0.156226489671869	NA	0.164544225830266	1	0.187117904994029	NA	0.147123728676827	NA	0.205708892054407
Gm27390	chr1	+	0.469274	0	0.427215	0	0.46383	0	0.472441	0	0.473404	0	0.549451	0	0.486056	0	0.522968	0	0.509524	0	0.544615	0	0.461207	0	0.455696	0
Gm28040	chr1	+	0.797297	0.010684460538756	0.547445	0	0.738739	0.0123315454657531	0.607143	0.00994893852506767	0.666667	0	0.627451	0.00986468206036202	0.790476	0.00849635903162306	0.636364	0	0.852632	0	0.587097	0.00852617054102487	0.774436	0	0.519685	0.0365558040665149
Gm28062	chr1	-	0.507825	0	0.512041	0	0.519889	0	0.497732	0	0.557026	0	0.479159	0	0.558574	0	0.501215	0	0.546601	0	0.519673	0	0.550921	0	0.523508	0
Gm28177	chr1	+	0.351449	0.00443169158813068	0.346667	0	0.329218	0	0.355505	0	0.314433	0	0.319829	0.00409166455787949	0.357447	0	0.321429	0	0.337469	0	0.358025	0	0.321149	0	0.308333	0
Gm28306	chr1	-	0.55102	0	0.460317	0	0.136364	0.0341506882936262	0.433333	0.0275523533822762	0.277778	0	0.566265	0.0273190155357852	0.52	0	0.406593	0	0.47191	0	0.347368	0	0.742424	0	0.758065	0
Gm28551	chr1	-	0.545096	0	0.609531	0.00918051269620759	0.59621	0	0.59749	0	0.606733	0	0.58949	0	0.600644	0	0.575161	0	0.612699	0	0.604547	0	0.608824	0	0.633673	0
Gm28645	chr1	+	NA	0.72157996794542	NA	0.383579400152716	NA	1.24922491167695	NA	0.232582897966343	NA	1.0315374706127	NA	0.40997898492001	0	0.948986058860097	NA	0.225354633871756	NA	0.907215367102055	NA	0.442937583070973	NA	0.68799421570683	NA	0.443120296338192
Gm28778	chr1	+	0.525907	0	0.510315	0	0.452632	0	0.486405	0	0.535142	0	0.504376	0	0.540726	0	0.483871	0	0.546237	0	0.555215	0	0.46139	0	0.475069	0
Gm28836	chr1	-	0.602649	4.99502749957989	0.470199	4.05564014114075	0.493506	6.53562169127673	0.466667	4.14460519598791	0.410526	5.53754736001425	0.354167	5.11405065549511	0.575472	5.15190756257169	0.542683	6.13524727286455	0.535948	4.28600016482558	0.426829	5.97902760238267	0.566667	3.71754587371078	0.612245	4.79421959071382
Gm28845	chr1	-	0.688088	0	0.618911	0	0.492891	0	0.608696	0	0.627145	0	0.603567	0	0.566176	0	0.55314	0	0.618557	0	0.590203	0	0.604167	0	0.654676	0
Gm28888	chr1	+	0.0368421	11.9376868991009	0.0843373	9.81283503428657	0	4.23057862007054	0.0490798	12.6841095198944	0.0621762	11.7370030873037	0.0497238	11.4333538120493	0.0564972	8.94147682835888	0.0846561	12.6027439550053	0.0651163	10.8825784498209	0.0642202	12.451311868416	0.011976	9.5462357876414	0.0769231	8.36079054609891
Gm28940	chr1	-	NA	0.418771142103145	NA	0.308687916793529	NA	0.354440288669342	NA	0.233965673816321	NA	0.319948334374938	NA	0.30072031667364	1	0.370010879349815	1	0.251882706111118	NA	0.297128523849148	NA	0.304473503892187	NA	0.327437851578012	NA	0.360849108314132
Gm28941	chr1	+	NA	0.923465173408706	0.222222	1.04943099605203	NA	0.0177637306856718	0.266667	1.41882428611916	NA	0.414745006620977	0.761905	1.3215473031603	NA	0.330455734017552	0.285714	1.24975431173717	0.56	0.795626072102125	0.513514	1.35102495839347	0.3125	0.603083330011544	0.472727	2.49252832512524
Gm29107	chr1	+	NA	0.135326236506722	NA	0.124690940453102	NA	0	NA	0.042003443628888	NA	0.16766199810535	NA	0.16659088436231	NA	0	NA	0.0813961021477236	NA	0.171459509096428	0.5	0.359966566069205	NA	0	NA	0.205780030576155
Gm29156	chr1	-	NA	0.250945646321083	NA	0.260126791606571	NA	0.0362038358864294	NA	0.438132112401527	NA	0.174885911851372	NA	0.463383061111996	NA	0.29933064484155	0.4	0.481117842253929	NA	0.166923906851793	NA	0.525666606602465	NA	0.326095648688505	NA	0.357743840731091
Gm29170	chr1	+	0.557692	0.512364474280771	0.533333	0.67667340334633	0.625	0.300602444229957	0.606897	0.763348998453637	0.615385	0.392777729194836	0.363636	0.654389533622324	0.285714	0.397249978127482	0.565891	0.666433361706218	0.409091	0.496615209898442	0.534188	0.681442435493804	0.5	0.498497049594031	0.524272	0.905718407900041
Gm29183	chr1	-	NA	0.237763058571305	NA	0.602462430012012	NA	0.114339962704609	NA	0.368992276942383	NA	0.110465911409917	NA	0.530507616879089	NA	0.110291344138347	NA	0.518410744248444	NA	0.0301247846361825	1	0.632447586967161	NA	0.0475331242538161	NA	1.12983656028364
Gm29247	chr1	-	0.571823	0	0.58209	0	0.53719	0	0.620805	0	0.572895	0	0.507418	0	0.520572	0	0.567901	0	0.545635	0	0.575931	0	0.53944	0	0.564815	0
Gm29253	chr1	-	0.487208	0.0029923025596019	0.536871	0	0.520344	0	0.49667	0	0.538323	0	0.506579	0	0.507692	0	0.486655	0	0.520635	0	0.558637	0	0.459699	0	0.458853	0
Gm29283	chr1	+	0.0740741	2.60878911487959	0.0833333	2.90454845782307	0.16	3.38732139512405	0.0869565	1.9737243146866	0.05	2.52511776660401	0.2	2.4588062559135	0.119048	2.11774698987869	0.152778	4.02091092102661	0.0681818	2.23111686211726	0.357143	3.07933898897466	0.0555556	1.78194200761702	0.24	3.71904534426697
Gm29427	chr1	-	0.464481	0	0.484375	0	NA	0.0094634437440169	0.426184	0.0229049684744224	0.435294	0	0.413919	0	0.371951	0.0195607637213113	0.466667	0.00739770755507074	0.431818	0	0.477273	0	0.431718	0	0.479167	0.00935118787453193
Gm29486	chr1	+	NA	0.0420772437883805	NA	0.0775407819663555	0.323944	1.11696619480793	NA	0.195903157785271	NA	0.117295793029347	NA	0.194244075516537	NA	0.200760741634319	NA	0.113888900988952	NA	0.0319873385249787	NA	0.067155052917212	NA	0.100944000431491	NA	0.0959753637230186
Gm29630	chr1	-	0.53	4.18568949908258	0.65	3.09342361928174	0.533898	5.98835648683026	0.512821	2.76076115840457	0.57377	4.53761552532473	0.571429	3.22044773669757	0.651852	4.36864321350223	0.513158	3.26502665453564	0.516779	5.36959601356355	0.589286	4.00124396072191	0.738854	5.12536835617053	0.596491	2.98352384164036
Gm32391	chr1	+	NA	0.608717460138572	NA	0.213667932529513	1	0.836375653117049	NA	0.539822034786079	NA	0.511757200698412	NA	0.294387687782841	NA	0.553207376947901	NA	0.575349855366409	NA	0.440714441899706	NA	0.485754882767833	NA	0.625852802675245	NA	0.495872712568929
Gm33222	chr1	-	0.683544	1.62492252359123	0.676923	1.51617192596501	0.692308	0.854619852646278	0.634921	1.62797840976879	0.702128	1.37610622886467	0.8	1.51923881402684	0.545455	1.68470183452925	0.705128	1.68872846091897	0.614679	1.81382080424426	0.698529	1.72344045134448	0.646259	1.90798751932532	0.802083	2.0173743996234
Gm35048	chr1	+	NA	0.508350769708872	1	0.823559482983133	0.952381	0.464215351794302	1	0.723037864579641	1	0.638470890536619	1	0.789121756038489	1	0.519742476736385	1	0.957609745645863	0.962963	0.666733946899663	0.948718	0.753373281013434	1	0.49585768092043	0.96	0.930159520793109
Gm36527	chr1	-	NA	0.118855364098179	NA	0.180937024410103	NA	0.0119285005660801	NA	0.332019957347793	NA	0.0864325553124805	NA	0.181303020898103	NA	0.0780773039436209	NA	0.139870159022417	NA	0.145352831778741	0.769231	0.169073764789257	NA	0.123972162959771	NA	0.265207591403653
Gm37121	chr1	+	NA	0.251080642511886	NA	0.383699456302998	NA	0.00706796326577788	NA	0.484699362219895	NA	0.142260155865014	0	0.350551279946276	NA	0.107135231451178	0.125	0.486211145380064	NA	0.125696724626325	0.133333	0.449592044412884	NA	0.279136226545297	NA	0.40507911730983
Gm37144	chr1	-	0.333333	1.22499662785651	0.428571	0.865355126744527	0.515152	1.46096644520133	0.352941	1.05194885213531	0.333333	1.10033653495704	0.666667	0.992773024570434	0.555556	1.07153863665344	0.5	0.982415563313394	0.518519	0.900207151323835	0.4375	1.01012878727125	0.8125	0.870751725461211	0.818182	1.22631477786612
Gm37154	chr1	+	0.72	0.788703685893831	0.540984	1.050948086744	NA	0.140044295405645	0.586667	1.34453348664161	0.666667	0.721596444558838	0.730159	0.95224770043921	0.448276	0.685076577266878	0.619048	0.985271422509072	0.421053	0.747164716616014	0.510204	1.09415883892555	0.768116	0.980017566979841	0.482759	0.968681578041629
Gm37214	chr1	+	NA	7.29663505711956	NA	4.37716021169903	0.117647	23.3118712607664	NA	5.56912470385202	0.166667	11.3848628456913	0.142857	5.64817663777082	0.176471	9.1179567395971	NA	6.36733449502861	0.266667	9.54801102565466	NA	5.05906286201433	NA	8.7182115307163	NA	4.19001615205624
Gm37258	chr1	-	NA	0.21165345000867	NA	0.239342229277835	NA	0.099933267956948	0.609091	0.85999920968993	NA	0.330764043281282	NA	0.133236870483378	0.6	0.344267036975876	NA	0.269077403442859	0.461538	0.336427373595228	NA	0.168898879248452	0.151515	0.361586745245686	0.5	0.504711255079377
Gm37285	chr1	-	0.5	1.08565938582347	0.662921	1.10163734309005	NA	0.0158610308229397	0.597561	1.36922375636258	0.57971	1.08542375639098	0.603175	1.02773704714035	0.426829	0.775898845192513	0.6125	1.05389729273358	0.447761	0.950689537969779	0.329545	1.06375018852708	0.514851	0.912129633398514	0.542857	1.15979359638598
Gm37309	chr1	+	NA	0.525259553331462	0.754717	0.791966253884558	NA	0.110224003095352	0.647059	0.809239011268698	NA	0.399335280722244	0.727273	0.599584885206385	0.85	0.394907035405152	0.590909	0.715158370334529	NA	0.283143567614637	0.805556	0.739238233515765	NA	0.374213390251214	0.619048	0.827765553135199
Gm37509	chr1	+	NA	0.212391161766783	NA	0.236659653890372	NA	0.0798106650371081	0.4375	0.505923459550222	NA	0.17899730359417	NA	0.20977624614951	NA	0.125689274661562	NA	0.155972808549085	NA	0.244068742674025	NA	0.256202142558881	NA	0.177742985928596	NA	0.26475753539496
Gm37559	chr1	-	NA	0.338640894719947	NA	0.260022574141985	NA	0	0.454545	0.963504473145826	NA	0.262223768070416	NA	0.503727184296251	NA	0.119684288281998	NA	0.492240971101287	NA	0.400456872687714	NA	0.465403888366159	0.1	0.481425232827112	NA	0.708049017466212
Gm37599	chr1	+	NA	0.160048411955803	NA	0.294940397663438	NA	0.184721003142416	NA	0.149030623100451	1	0.535386932600211	NA	0.265983298498718	NA	0.254543271601795	1	0.462076849820206	NA	0.121669631199305	1	0.332067316878975	1	0.332764271361071	NA	0.511083531972884
Gm37607	chr1	-	0.333333	0.954798913566302	0.522388	0.824776140625741	0.25	0.371920915667452	0.421875	1.0113173766446	0.398148	1.00919994551518	0.6	0.837463744262835	0.514019	1.01076872055769	0.476923	0.963735435131825	0.387597	1.13866632586897	0.342857	0.895264159515466	0.646465	0.987811895949491	0.4	0.918772925308805
Gm37691	chr1	+	NA	0.0912518539988976	NA	0.201792878370275	NA	0.0351063235665143	NA	0.164275419058492	NA	0.0565280930261915	NA	0.134800707828344	NA	0.0387008658572181	0.2	0.126238299891368	NA	0.0924935089878902	NA	0.0728187320789046	NA	0.0583772532615853	NA	0.312209014520663
Gm37738	chr1	-	NA	0.189186996880581	NA	0.162085883932216	NA	0.0344765536399394	0.818182	0.34614542688573	NA	0.16345800504429	NA	0.122576414066415	NA	0.205869157451986	NA	0.15871031749351	NA	0.219516162854625	NA	0.180105409096034	NA	0.183137588569092	NA	0.283896591165418
Gm37785	chr1	+	NA	0.357516780693632	0.1	0.371345638553161	NA	0	NA	0.381327774572724	0.142857	0.344288482197437	NA	0.324084301409983	NA	0.206763554507106	0.382353	0.551282819737219	NA	0.306377066337254	0.207317	0.466850326343077	0.272727	0.327481117678907	0.296296	0.481869662546219
Gm37893	chr1	+	0.534091	0.847829700034731	0.5125	0.79895323560738	NA	0.0889571478407629	0.54375	1.24400514869045	0.72093	0.746033972899009	0.559441	0.948822927759072	0.54717	0.556725930227628	0.632979	1.22272843884897	0.525547	0.810538419612016	0.614865	0.978970213351199	0.507937	0.662577033607769	0.307692	0.776467078852291
Gm37902	chr1	-	NA	0.455724301708022	0.6	0.411339335350934	NA	0	NA	0.571576272126437	NA	0.241979199879913	NA	0.480866616893702	NA	0.214478795875523	NA	0.352426260457791	NA	0.381795398864986	NA	0.371088527706519	0.631579	0.498302290900076	0.55	0.625807273616403
Gm37912	chr1	-	0.54023	0.712413152307822	0.557587	1.24251792689261	0.742857	0.416991450461738	0.585284	1.41676959909883	0.630631	0.68562365366309	0.644928	1.07119671710082	0.602941	0.606981436020536	0.544828	1.17073051016601	0.389831	0.754343802536396	0.604124	1.19385790433187	0.509434	0.797575743331262	0.495146	1.36961461833083
Gm37988	chr1	+	0.499764	0	0.526242	0	0.485915	0	0.508639	0	0.48809	0	0.545259	0	0.544331	0	0.527176	0	0.528028	0	0.509721	0	0.505761	0	0.562244	0
Gm38037	chr1	-	NA	0.375896953744966	NA	0.28418887577817	0.45	0.700825116232562	NA	0.215396969545184	0.571429	0.501540632263416	NA	0.177977330276236	0.403509	0.475199686479263	NA	0.304358269884268	0.80303	0.388338895540936	NA	0.299964749914689	0.818182	0.408499982041724	NA	0.164883783735974
Gm38067	chr1	+	0.45283	1.18767479327328	0.571429	0.943392559245298	NA	0.189070791285487	0.556391	1.63217776922761	0.5	1.11121038043082	0.755102	1.02848731224831	0.5	0.92490715298197	0.481481	0.724216601160515	0.627907	1.2391201969268	0.571429	0.947761264875566	0.608696	1.25760060820144	0.675	1.86828023573851
Gm38157	chr1	+	NA	0.285768418944408	NA	0.246322130698776	1	1.34056535778761	NA	0.369100931912036	NA	0.334065050111852	NA	0.33193086544098	NA	0.329871889964517	NA	0.332679004066668	NA	0.301336553030365	NA	0.183905180250316	NA	0.346467393707144	NA	0.241803654892269
Gm38190	chr1	-	NA	0.296266271721342	0.5	0.427672880725476	NA	0.0151972358421268	0.752475	0.637568989980782	NA	0.238587783423732	0.747967	0.604816000939567	NA	0.201562940181333	0.857143	0.555385033886817	0.545455	0.277775222370856	0.748466	0.606810516012814	NA	0.242180684946888	0.785714	0.728322823255815
Gm38228	chr1	+	0.409091	0.823190996806554	0.8	0.814268165150174	NA	0.223550986633606	0.606061	1.31886914763281	NA	0.449951379292779	0.75	1.17357673467532	0.8	0.519835238199304	0.57377	1.11405013125156	0.763158	0.78224257088927	0.784615	1.24618587756812	0.7	0.70668607262634	0.5	1.06307746267678
Gm38248	chr1	-	0.620042	1.02583199848456	0.574561	0.738212915777221	NA	0.00937180396368404	0.566906	1.3609900168046	0.586207	0.578467234514437	0.601179	1.03958703698202	0.5	0.314246279314172	0.60815	1.15263524071959	0.612048	0.808649652947913	0.583446	1.07564209607738	0.537428	0.850631684078753	0.592342	1.2656201344488
Gm38319	chr1	-	0.197279	1.9658647832505	0.288889	2.77970841134366	NA	0.0713495817824971	0.348739	3.30417136457925	0.309091	1.6199049331162	0.40873	3.12778990983406	0.216216	0.707895695620537	0.392982	3.29072353726371	0.283237	1.7670351556737	0.271777	3.23617335574508	0.37037	1.80933748640711	0.40856	4.4417034443378
Gm38336	chr1	-	NA	0.214925741123858	NA	0.147111503173517	NA	0.191359074498966	NA	0.297336263962203	NA	0.108414628629715	NA	0.19276571731135	NA	0.117195756591552	0.2	0.155128389263884	NA	0.158719442002327	NA	0.205812190423405	NA	0.117853803563797	NA	0.189089163051
Gm38359	chr1	-	NA	0.0984891171460161	NA	0.0777847304938901	NA	0	0.466667	0.412690912885897	NA	0.0980540112514994	NA	0.0649517268244061	NA	0.0335653914103221	NA	0.107900136307735	NA	0.0855679275958082	NA	0.12350493327516	NA	0.0787590043816039	0.363636	0.304878144177211
Gm38372	chr1	+	0.507042	1.66320021028073	0.570755	1.24962321761768	NA	0.237706764570109	0.479714	2.18555554699389	0.588235	1.20603837241893	0.47769	1.79750033973029	0.557252	0.732368008335324	0.548807	2.11763235562774	0.45614	1.5834209044619	0.544732	2.02495491986562	0.508306	1.44810032793776	0.520913	3.05353196687183
Gm38394	chr1	-	0.524437	0.470075234366843	0.512952	0.400469584058613	0.570968	0	0.534672	0.637198360871949	0.526394	0.350871031137414	0.524058	0.418355377138492	0.521863	0.23286348330566	0.523248	0.497809776752811	0.527425	0.411249583092115	0.526735	0.391107431070033	0.522211	0.447389853034884	0.515152	0.495677410200844
Gm38399	chr1	-	0.470199	0.542374393488645	0.362162	0.613727040244345	NA	0.0109821970257315	0.360996	0.788566777866838	0.517045	0.46861273664977	0.362637	0.491974781904012	0.392405	0.287533317501797	0.309524	0.600945690324682	0.374194	0.520819984834668	0.410138	0.668202982461353	0.376147	0.684823735450117	0.445205	0.71622709122418
Gm43543	chr1	-	0.489899	0	0.487923	0	0.471223	0	0.519608	0	0.437186	0	0.373585	0	0.56	0	0.442623	0	0.565041	0	0.465574	0	0.481651	0	0.476415	0
Gm5250	chr1	+	0.192308	1.36534757414259	NA	0.584092245466192	0.2	1.01303069760719	0.1	0.544867100531743	0.133333	1.40462625671281	0.0714286	0.720336908083756	0.1	1.00818166826954	0.0909091	0.747905929235859	0.060241	1.92761082999124	NA	0.622596378447423	0.0833333	1.20881226684938	NA	0.889790287974153
Gm5251	chr1	+	NA	0.994877204826964	NA	0.427788551356758	0.8	1.03342008664802	NA	0.432315104129529	NA	0.739559915371479	NA	0.704217080559107	NA	0.949360117219916	NA	0.26927968962642	NA	0.554627920526325	NA	0.582200162155151	0.645161	0.82209478317511	NA	0.340387201000706
Gm5835	chr1	-	1	1.93502310725715	1	2.33941149749833	1	2.31867039330276	1	1.88215115750611	1	2.81731564611592	1	2.41241964906082	1	2.12679922673081	1	2.35741057417131	1	2.44544462367498	1	1.79002586720745	1	2.47384336175569	1	2.47389724947775
Gm5837	chr1	-	1	4.91649080817338	1	3.27642372069087	1	5.97791708591651	1	3.61984388556333	0.993902	4.80218744171575	1	3.65252643504522	1	5.40983473987584	1	4.02313166678284	0.994898	4.66758122213575	1	3.54925982379252	1	5.04705255042711	1	3.05130148333138
Gm6123	chr1	+	1	2.19636127538974	NA	2.09120743132837	NA	1.26747292614558	NA	1.85428111481242	1	2.21775731404038	NA	2.35229757156865	1	2.28217449236693	1	2.04765638634954	NA	2.33755929426692	NA	1.82279795645072	1	1.90858759281693	NA	2.25438857164172
Gm7160	chr1	-	NA	0.309298921171328	NA	0.427486654002236	NA	0.331480992795014	0.5	0.545155491728214	NA	0.277139248456073	0.333333	0.387555998800532	0.416667	0.368935053786709	0.391304	0.45844904110161	NA	0.33590091549166	0.333333	0.608234261919194	0	0.371006601444747	NA	0.705490041311899
Gm7241	chr1	+	0.269841	1.13997507540957	0.25	1.00998497519203	0.3	1.21450178872795	NA	0.571576272126437	0.470588	1.10001768925001	0.4	0.85010348343708	0.296774	1.84789859106547	NA	0.632928794291542	0.196429	0.899946297324611	NA	0.909697019349124	0.246914	0.981729886549405	0.22449	1.15009133335315
Gm7694	chr1	-	NA	0.14724286616514	NA	0.229887042641826	0.7	0.127456044133228	NA	0.365617641537893	NA	0.0798114045070344	NA	0.154826790686084	NA	0.0943213518313315	NA	0.236169928990939	NA	0.0901696911438385	NA	0.172985239523877	NA	0.0784973465597381	NA	0.247223709323626
Gm8292	chr1	+	NA	38.2622403515674	1	48.0752848191404	1	176.277574016961	1	41.0019372785245	1	46.2785219770334	NA	54.6320291666421	1	49.5057737893719	NA	49.0354990369098	1	37.7411822063203	NA	45.452778316133	NA	39.8269965338792	1	66.6272608342616
Gm9530	chr1	-	NA	0.0667900901096879	NA	0.127477896350662	0.4	0.14316018494073	0.5	0.204345921122923	NA	0.146289053665373	0	0.189401294237277	NA	0.113811331740272	NA	0.202299455947459	NA	0.0616543519756066	0.428571	0.163701954657684	0.3	0.118265387887428	0.2	0.277483175945308
Gm973	chr1	+	NA	0.222522977251234	NA	0.102517442375271	0.740741	0.310895192269772	NA	0.152676939131416	0.5	0.250301235854619	NA	0.0946149593425108	0.869565	0.267756095744986	NA	0.124157223150694	0.666667	0.231486373523078	NA	0.12383361609762	0.590909	0.213066236601	NA	0.110193936126429
Gmppa	chr1	+	0.475089	9.63345759164724	0.523256	10.8094116388756	0.481633	15.1389929909845	0.518948	11.0455026366145	0.463987	9.58916371272405	0.545879	9.96236094765283	0.477446	10.862036284332	0.478895	10.5135385793108	0.55	9.89702945433562	0.545259	10.4255485784385	0.504151	9.81504437097379	0.529095	10.7481186867968
Gorab	chr1	-	0.513245	4.10644423196809	0.498433	4.25857776909303	0.512397	1.07571677696876	0.514936	4.45679340873649	0.542722	3.92782731936173	0.549223	4.01915825549342	0.525788	3.68401234823887	0.539941	4.13031762115449	0.531088	3.82611143850302	0.487923	4.54570318615162	0.508721	3.7616932027696	0.505952	4.54570249854782
Gpa33	chr1	+	0.481633	26.7386612999913	0.545577	20.2084512336037	0.441181	24.2984513595283	0.532149	19.9385690069401	0.480185	26.9463770769681	0.557526	20.6446173809598	0.490365	28.5440480272024	0.54523	20.220222587544	0.483994	29.6874698832856	0.536589	20.3670842218348	0.469921	30.4161723138232	0.557645	20.8722264747832
Gpatch2	chr1	+	0.485352	2.68687624351342	0.507909	3.00877205485745	0.46608	1.18024316526273	0.512315	3.06906108949306	0.502857	2.36795843283244	0.502236	2.92834319405207	0.480241	2.238675609864	0.495944	3.13541302327002	0.501556	2.43591658796492	0.507208	3.00241816622655	0.487465	2.51676881867062	0.456909	3.35236799486345
Gpc1	chr1	+	0.722433	2.46669379770937	0.615385	3.27646252033529	0.673333	2.65085202156377	0.674888	3.62190345262364	0.654605	2.45277576119519	0.65641	3.16543669641913	0.63388	2.61055119050139	0.587234	3.59420037755636	0.640327	2.44720810566018	0.575581	3.46712204973934	0.67	2.27340211710295	0.544118	2.59864598895398
Gpr161	chr1	+	0.546392	0.580063997390637	0.576667	0.886651331625629	0.555556	0.368476214197158	0.558824	1.03001952170329	0.479592	0.553625360376954	0.592875	0.93826417218192	0.516667	0.557816114072719	0.60274	0.843844451108029	0.56213	0.603339463623399	0.657431	0.956279465111543	0.717949	0.496223422977213	0.743719	0.846160273674071
Gpr37l1	chr1	-	NA	0.0896807188015021	NA	0.108058154507543	0.4	0.199049296026094	NA	0.0513889640871719	NA	0.0705118826320096	NA	0.0827998544907866	NA	0.060343246273515	NA	0.0933597866194141	NA	0.0524428820242048	NA	0.082574965905254	NA	0.049648966276573	NA	0.173085583232522
Gsta3	chr1	+	0.622146	3.65734938066683	0.640884	2.51664819702406	0.677715	4.2918547326802	0.679845	2.74123716973898	0.590731	3.55246402258588	0.594477	2.66146578608294	0.638486	3.96567166624255	0.664702	2.74382063119239	0.605375	3.77194342435294	0.65956	2.67126846541822	0.657541	3.53554967257148	0.649087	2.67113754008125
Gtf3c3	chr1	-	0.476708	19.7685299019912	0.458418	19.2691598442605	0.415973	6.97318223716366	0.455802	18.0170125461922	0.491331	18.4075086428504	0.435446	19.2993340872318	0.493972	16.5717903227546	0.463407	19.6965593402529	0.465619	18.142490983568	0.466647	18.5118050784057	0.485516	17.1807713546585	0.470462	20.0515822240665
Gulp1	chr1	+	0.460317	1.45364672872748	0.481928	1.61189086940173	NA	0.0721090238451102	0.393258	1.97024987470087	0.307692	1.11852369318778	0.477778	1.78435771084398	0.454545	1.08970665456542	0.413043	1.7361541670716	0.567164	1.07023948823223	0.488889	1.62866192732163	0.423077	0.945940372324479	0.557692	1.35856983730966
H3f3a	chr1	-	0.333333	107.076498430931	NA	86.3626392187674	NA	44.2517192303649	NA	90.0550714709482	NA	107.66133618478	NA	89.725462841596	NA	112.504050740477	NA	94.269067600547	0.633333	101.578641673747	NA	93.0824229366463	NA	104.0801784175	NA	87.3517143463034
Hdac4	chr1	-	0.444613	2.13895255819006	0.481214	2.1622152489389	0.551351	1.25960621288168	0.532756	2.35667867440073	0.564885	1.85698885026728	0.525692	2.28596282401448	0.476127	1.82558434392807	0.484247	2.41478544174272	0.533851	2.08111808944679	0.497807	2.31943725207331	0.509642	1.92213133933822	0.45283	2.11198235511309
Hdlbp	chr1	-	0.523224	46.1866293366828	0.512021	45.0132459185573	0.527686	25.8138626931126	0.513527	44.7337453863484	0.526361	43.6173317544116	0.524275	46.943960973578	0.540858	42.2247014884247	0.522905	46.8353818900156	0.53729	48.2741157954644	0.526757	46.6563764191445	0.514377	46.306472915961	0.529172	44.2737235506552
Hecw2	chr1	-	0.520478	1.52332167363016	0.504329	3.51123730014514	0.491525	0.493957117015077	0.483386	2.50931563447367	0.460342	1.41773260674878	0.520875	3.05622281146693	0.492114	1.16905490332081	0.458952	2.5938555659546	0.461305	1.15436071319246	0.481069	2.38972814475351	0.573407	0.817906033927949	0.433526	2.92445020784067
Hes6	chr1	-	0.681818	6.91733131456459	0.642776	9.57251246398813	0.676948	14.3686376583728	0.645312	7.72291855739863	0.668501	7.65848107053562	0.65931	8.49680312455281	0.693943	8.65380953458464	0.755784	8.95917622226585	0.703329	6.19315919543465	0.705882	9.43030773514986	0.723404	6.18237337155967	0.657895	7.99759308545906
Hhat	chr1	-	0.793103	0.263444933568169	0.75	0.401940905864944	0.793103	0.231004213175673	0.776316	0.441238141875965	0.796296	0.222541526446937	0.697248	0.432763062934417	0.826923	0.26118643370655	0.755435	0.404374056320117	0.666667	0.210675952881892	0.76259	0.375407754832283	0.673077	0.210669577293962	0.694915	0.396047845186201
Hibch	chr1	+	0.570492	2.02537448364311	0.597957	2.16850558525682	0.542571	1.71145731929467	0.552913	1.96773551085746	0.565591	2.054834899374	0.565217	2.05840373089708	0.58959	2.2001839851464	0.547597	2.13499866808535	0.576767	1.98157840248782	0.547598	2.16461162481127	0.584644	1.97909551068785	0.61	2.30397897412783
Hjurp	chr1	-	0.663717	16.3986398233123	0.656028	19.489793175869	NA	8.38773042457637	0.623494	21.7254556182073	0.526012	15.0963670109556	0.662295	19.0868691250017	0.661111	14.5672630318024	0.601852	18.3431260235962	0.475096	15.4829315634625	0.630734	18.0728104024388	0.632	14.7061510805073	0.515152	19.7520547257921
Hmcn1	chr1	-	NA	0.120399969531983	NA	0.15041250453065	NA	0.00852518243939798	0.333333	0.186394121491659	NA	0.0720679168157285	NA	0.143215017501315	NA	0.0558010838670256	NA	0.173270641682026	NA	0.121289539198673	NA	0.193336580075186	NA	0.128177111208087	NA	0.146578579186059
Hnrnpu	chr1	-	0.539118	20.8260517352594	0.534396	22.3397944224315	0.536755	22.3386517335621	0.539697	22.1255331145717	0.564186	20.4817124547854	0.518329	23.2689615722578	0.559833	20.9458058192318	0.524624	22.5381800185472	0.552331	19.9547864636379	0.538774	21.7233815813788	0.55925	18.6295820311904	0.54323	31.3271557464353
Hs6st1	chr1	+	0.516032	20.7874643293185	0.568961	29.9824263660041	0.539476	15.3470555787264	0.549042	32.6508562198606	0.521905	19.9746565883344	0.536962	26.778259728268	0.528933	19.9846414474656	0.546032	25.8771529959055	0.511356	20.6401793773928	0.543137	25.6803733609889	0.487085	20.3227120839836	0.522415	26.7867898228141
Hsd11b1	chr1	-	NA	0.184106500697219	0	0.251063590445758	0	0.174240009033277	0	0.240005562396069	0	0.229238637611813	0	0.234573367695059	0	0.219604198682565	0.0714286	0.219258237048596	0	0.254724860914509	0	0.211559743276242	0	0.14428034500629	0	0.205767928715971
Hsd17b7	chr1	-	0.618602	4.25052709234692	0.623203	7.37518573929995	0.71039	2.07769870317431	0.631805	5.88262178189689	0.596749	3.26856309776215	0.621353	7.1381044258744	0.570387	2.95083676281478	0.623386	6.4136588144703	0.589258	3.13568670799135	0.623529	6.62229870965507	0.634294	2.97231033245454	0.6877	8.09679307709533
Hspd1	chr1	-	0.292042	603.370857768889	0.285673	494.751454024623	0.295734	615.232612071443	0.278148	476.25911396791	0.300757	607.694497637341	0.285448	506.112423045144	0.295579	628.680818652665	0.295381	508.790259287865	0.290774	575.904013979733	0.291637	501.439612182435	0.285685	557.842833088545	0.31126	512.677579787919
Hspe1	chr1	+	0.493374	279.243087781033	0.482919	230.614597266415	0.477241	669.804122093277	0.486039	226.142949972901	0.490604	303.454879820833	0.499332	238.777573952275	0.490136	342.195730706476	0.495073	236.025089149926	0.493775	281.570782573634	0.491633	234.76677544059	0.48607	284.750287371863	0.48312	226.654872025909
Htr5b	chr1	-	NA	0.242678057198102	NA	0.216152443372879	NA	0.252079731730162	NA	0.331425621357035	0.4	0.353281592648598	NA	0.186715235380237	0.666667	0.250873112801955	NA	0.218949205002016	0.6	0.227531642097058	NA	0.225932503612946	NA	0.232875461460556	NA	0.156834160254359
Iars2	chr1	-	0.503765	13.0418902537672	0.455357	11.2491296723684	0.487492	7.47231281310426	0.467844	11.4239344464555	0.496859	13.0173643359597	0.473646	11.4052600607354	0.503251	12.8184095362014	0.487776	12.2752879921071	0.483241	13.4233633068475	0.448998	12.0662778130611	0.476797	12.7297826110828	0.408347	10.9740510093251
Ica1l	chr1	-	NA	0.116898690733962	NA	0.177724167180541	NA	0.161903337780388	NA	0.149670597770225	NA	0.154788399016323	NA	0.188876614131838	1	0.169649573681279	NA	0.14501910096054	NA	0.15996058160064	NA	0.14925574121107	NA	0.154243035760143	NA	0.193312588469739
Idh1	chr1	-	0.584111	73.4170309478674	0.577046	76.110237088808	0.607098	39.580278002739	0.583585	75.4901471554474	0.563267	70.5083594668494	0.570118	77.4950163214207	0.57284	65.5284219904763	0.573722	78.8673446797906	0.569243	66.1224346308319	0.581495	77.2800282430743	0.580638	68.7602407962655	0.581984	77.8865533809097
Igfbp2	chr1	+	0.417083	180.527641770975	0.395247	287.678652088027	0.396642	387.204885959287	0.39148	233.116314942945	0.421005	198.341533968458	0.387844	244.26368125661	0.393379	211.453560907483	0.394961	238.158648896849	0.393756	177.967506801306	0.390047	248.498056316399	0.384333	183.608337659777	0.401678	277.774630932494
Igfbp5	chr1	-	0.776471	0.469112927750576	0.73622	0.669980242984024	0.916667	0.261691163392867	0.74	0.594559234117535	0.714286	0.406844149248645	0.7	0.623211061867044	0.9	0.360607206252253	0.744444	0.895865341045961	0.709677	0.350678374598518	0.71875	0.842289399975621	0.815385	0.310529695633072	0.782353	0.754955058896152
Igsf8	chr1	+	0.370558	6.01566667663437	0.350621	9.39665860266005	0.377984	9.28391403522083	0.308587	8.0936054703723	0.377953	5.69854754035773	0.321239	7.69818648035614	0.360316	6.13172638911489	0.315115	7.7608616854093	0.37931	5.04756155222338	0.358136	8.26258161717798	0.38226	5.83025612612937	0.32882	8.99243350406771
Igsf9	chr1	+	0.633663	1.36594493583079	0.59375	0.89650372326074	0.536585	1.19946286949745	0.670213	1.18153425399639	0.546512	1.32424324834463	0.644444	0.889574410450871	0.48	1.33470064742308	0.526316	0.965403073597819	0.534653	1.25255683487285	0.632353	1.00312098554467	0.55914	1.06012573955879	0.333333	0.828854388885633
Ihh	chr1	-	NA	0.220822700668942	0.6	0.212931871738319	0.56	0.432676223699135	NA	0.396896712583859	NA	0.224278176435379	NA	0.29396623082109	0.384615	0.236855520642064	NA	0.291896356471684	NA	0.21471815820901	0.692308	0.245882674066957	NA	0.193012347281736	NA	0.152275872363687
Ikbke	chr1	-	0.818182	0.210022277378863	NA	0.121547626289244	0.611111	0.252415167168259	0.5	0.1826344009905	0.645161	0.248378849377735	1	0.10416548560634	0.619048	0.273291069450311	0.68	0.161298408009636	0.68932	0.288971445437233	0.8	0.173137611479838	0.690141	0.223469286384375	NA	0.12866956613565
Il17f	chr1	-	NA	0.201271563759257	0.52	0.485032547136728	NA	0.178691534197114	0.181818	0.324373774611813	NA	0.13667106250106	NA	0.478866403380235	NA	0.147740842508342	0.4	0.279371389171712	NA	0.100043486069221	NA	0.3397607276672	NA	0.173332131304717	0.181818	0.865202240327984
Ilkap	chr1	-	0.508593	11.2887883189228	0.532891	10.5236071628939	0.519829	19.8248126192189	0.520436	11.6239540633013	0.527072	12.2252785866513	0.531268	10.773791699557	0.511863	12.8168172388726	0.533927	11.1025689741627	0.533493	11.5694680001511	0.535123	11.2386084184961	0.499446	10.0050838613418	0.516439	10.4454569453235
Imp4	chr1	+	0.450551	16.8971938952531	0.490882	15.0937170963215	0.503293	15.1741015020515	0.474218	16.1105919508272	0.456772	17.5104118814539	0.496874	16.2799836396091	0.457652	18.035511283362	0.452327	14.9098188022155	0.446343	18.3365650993136	0.472083	15.3400890572531	0.466228	17.6172478395992	0.484904	13.5477086381687
Ing5	chr1	+	0.536676	19.0288796212004	0.558442	21.4371649604824	0.515483	9.85992981835784	0.55286	24.4502054245855	0.533854	17.8848180422375	0.561125	21.4010720673859	0.539279	17.174404319764	0.531863	20.8742532927012	0.559328	19.6140759176193	0.564551	21.4185282900518	0.55914	19.0521821681388	0.555092	21.3431836344111
Inhbb	chr1	-	0.857143	0.757805721737057	0.5	0.620289808829802	0.444444	0.513737110925199	0.727273	0.400775042982191	0.533333	0.868236967626869	0.75	0.573994666959984	0.604167	0.982901943531406	0.666667	0.623966641563912	0.552239	1.11582060695312	0.74359	0.824894476091892	0.755102	1.2178757241248	0.416667	0.939769107909717
Ino80d	chr1	-	0.559604	4.48205670095499	0.525832	4.56705706346568	0.428315	1.42583799029215	0.528277	7.50277352542458	0.529509	3.69426454197709	0.543984	5.01932042634131	0.513393	2.9907490778824	0.519156	4.83231513480837	0.5	4.63866069980081	0.516209	4.94753753377133	0.499623	4.44912690751803	0.488934	6.3613249151732
Ino80dos	chr1	+	NA	0.353273525973278	0.461538	0.515807743372027	NA	0.125456347967557	0.647059	0.708516420656729	0.3	0.287863425392857	0.466667	0.511833138986075	0.545455	0.337110745327627	0.56	0.657075687094592	NA	0.404906393495355	0.586207	0.689598449643621	0.428571	0.404196601727763	0.45	0.588848846175604
Inpp1	chr1	-	0.8	0.370722663693416	0.75	0.343820148396948	NA	0.16499646011337	0.842105	0.399351316446234	NA	0.222898321242766	0.769231	0.310958905783563	0.821429	0.252411570209588	0.7	0.391312391075972	0.791667	0.272615311119385	0.8	0.363510509351249	NA	0.195700102384519	0.6	0.254230715793854
Inpp4a	chr1	+	0.475676	0.703747674968001	0.360704	0.99695930971819	0.568345	0.246975200080929	0.371158	1.0552177331565	0.380435	0.613321373929904	0.415929	0.936366030037897	0.455927	0.62433556140096	0.520468	0.940847098879367	0.410774	0.737762849307027	0.466825	1.11716474571837	0.385042	0.741117692587419	0.493865	1.08617463717804
Inpp5d	chr1	+	0.438773	22.2045633897881	0.418147	27.4848717906427	0.430321	17.9397626672219	0.410499	24.3207508292631	0.437525	21.2506895914158	0.417588	26.2040317109766	0.449123	21.053099209144	0.414958	26.3124410427956	0.415076	22.6465307453215	0.425326	27.254085828628	0.442293	22.8968931176058	0.422566	29.4118661006749
Insig2	chr1	-	0.451017	5.51203412755153	0.425798	6.47832804358126	0.424157	3.31872317894484	0.432061	6.24051680812735	0.488576	5.52387869988711	0.493386	6.37075823881857	0.459574	5.21469234173105	0.448625	6.62805202069881	0.46996	5.27981738673224	0.455468	6.91258110494672	0.480929	4.87635382677574	0.457655	7.38112172443518
Ints7	chr1	+	0.642904	15.3704336947449	0.636115	15.5221622566076	0.65	12.0726065991177	0.623976	16.5845366107198	0.620183	15.5084942931176	0.629079	15.8477687508023	0.631865	15.2702696196669	0.627225	15.4439511785669	0.628296	16.4434237416434	0.632338	15.2589969985926	0.618256	15.4278402320901	0.642686	15.0148008018412
Ipo9	chr1	-	0.541192	23.803259845713	0.529347	20.1159417798441	0.501305	12.928845805949	0.537865	22.1309986560477	0.535742	21.5988384952658	0.530443	21.1185612968463	0.529335	20.3269946093711	0.541004	21.3402872990696	0.554643	23.7306499917265	0.536308	20.8731901560197	0.548605	22.9040992889653	0.534676	19.239114396996
Iqca	chr1	-	0.448037	4.12405053521815	0.495077	6.51469652987458	0.419753	3.3062903643161	0.454268	7.02881265755482	0.382184	3.74542623145213	0.46547	6.68218913948779	0.458515	3.66893121922922	0.49256	6.54384640338407	0.446064	2.75394542238992	0.494975	6.77117044360539	0.392027	2.62960750465983	0.384224	5.69188484375123
Irf6	chr1	+	0.698052	0.639926485387073	0.603365	0.748774771337864	0.559322	0.385899395983388	0.571072	0.612368495819715	0.677804	0.594626119535959	0.618644	0.607182414467933	0.624729	0.517678143798326	0.595078	0.645279143076744	0.714286	0.557174277444854	0.577652	0.660853600386608	0.718009	0.632138776503219	0.625	1.11871240911717
Itm2c	chr1	+	0.390052	12.5925653622289	0.319555	9.81963264390953	0.328756	20.7636047728947	0.367217	11.8310093003257	0.334036	14.6497783798147	0.324201	10.4022498107771	0.364007	15.3303513571713	0.339237	11.1911961575559	0.385965	13.7192937304981	0.321893	10.685660258765	0.401309	12.8989493734834	0.365344	9.24461211228465
Itpkb	chr1	+	NA	0.109208604828181	0.692308	0.179196799000906	NA	0.107050967662654	NA	0.143481322635963	NA	0.150131440337286	NA	0.128453943162957	NA	0.117774006704717	NA	0.122825418977285	NA	0.134198242558775	NA	0.111024381665099	NA	0.119631616682643	NA	0.12966718356003
Ivns1abp	chr1	+	0.379518	8.38076503142552	0.377246	7.13566370995411	0.452915	3.5666074033419	0.393939	8.82020536432533	0.430486	8.03904576269729	0.395564	7.69519616893054	0.403248	7.72251033836933	0.40146	7.83413146710755	0.413408	8.03284172178668	0.385113	7.7565012822042	0.414921	8.51436177181373	0.3825	7.79418842490129
Jph1	chr1	-	0.344538	1.01783488875855	0.487069	1.48612074921112	0.173913	0.234948262700348	0.329825	1.69431537808908	0.315789	0.747895624701729	0.363265	1.37924952924996	0.406667	0.821841691444211	0.453202	1.40148518735984	0.428571	0.88089981484155	0.405594	1.54198643114948	0.372671	1.02180049416367	0.487705	1.95015486959881
Kansl1l	chr1	-	0.346154	0.533188891726592	0.571429	0.551884647158499	NA	0.146390840605601	0.404255	0.702076466910406	0.465116	0.432149806491077	0.409091	0.479267525101007	0.465116	0.390374803436	0.361702	0.570059751108565	0.590909	0.45890118732624	0.313725	0.588553978177798	0.395833	0.499630388690322	0.666667	0.648265767091914
Kansl3	chr1	-	0.477576	8.96863157886076	0.472518	11.9860199128587	0.498123	5.56012411342423	0.486775	13.5094027254838	0.471545	8.19567383522588	0.474316	11.5901308356649	0.498222	8.21564648723059	0.492224	11.7510642367183	0.501864	8.68002193445482	0.502222	11.7312367077058	0.503089	8.41030316261899	0.475893	11.361678010501
Kcnj9	chr1	-	NA	0.116811452905056	NA	0.0840869020857166	NA	0.0969009851838969	NA	0.0509859897594128	NA	0.128894071071428	NA	0.0471839153586812	NA	0.0667641832020846	NA	0.0889225840743962	0.2	0.138751048639133	NA	0.0728243927390475	NA	0.0875726869414989	NA	0.0749359882800061
Kctd18	chr1	-	0.572391	0.839767466564186	0.529183	1.19734252101012	0.477941	0.423339018625437	0.510606	1.26506355519667	0.521127	0.806106815950397	0.503254	1.08947972832998	0.5	0.77620883981301	0.554104	1.10273742627181	0.480726	0.74296036725095	0.576985	1.12362677070191	0.470199	0.732324485054361	0.539256	1.38842830581622
Kctd3	chr1	-	0.378729	9.06737946264092	0.397098	9.84333916262483	0.321033	3.27356340018385	0.413565	9.56917399318972	0.374511	8.4934909655897	0.405913	9.92725101189755	0.389203	8.21950879416503	0.414925	10.0361774444131	0.378183	8.87213633578069	0.402536	10.0799494854798	0.356688	9.00938552946946	0.420998	9.95454252905627
Kdelc1	chr1	-	0.532653	9.89366350163152	0.535881	7.83571538127534	0.542184	5.13904340033408	0.544562	8.23755937796725	0.536173	10.161724313896	0.53393	8.3078415763343	0.532036	9.48614900358772	0.574074	8.14930446763834	0.523165	9.87577829558626	0.561404	8.04739634748407	0.534653	9.10509204017065	0.551948	6.96422920609467
Kdm5b	chr1	+	0.451954	37.1439252351718	0.456818	43.2459765343787	0.477244	20.5439525088832	0.457529	36.9340986345752	0.463096	33.5524775377866	0.458285	41.8232427758984	0.454745	32.6250332988085	0.462199	40.933549098786	0.463216	34.8892499706987	0.459821	40.1366787234688	0.462921	36.1932320281019	0.454763	45.1520635072399
Kdsr	chr1	-	0.410106	4.27870874592134	0.423997	4.5673585921216	0.443925	1.80945411950164	0.452126	5.78034305248965	0.452569	3.85977593735752	0.455514	4.81784436446015	0.397942	3.79052642686562	0.44349	4.66638348610778	0.425367	3.8895064547724	0.478374	4.49222544971427	0.429208	3.62129631988598	0.40995	4.34069698902243
Khdrbs2	chr1	+	0	0.109512865380234	0	0.089694438686959	0	0.0368652216746568	NA	0.0821456910382859	0	0.122960549528773	NA	0.0926844921209216	NA	0.117323399104926	NA	0.0699867272232176	0	0.114471839782131	0	0.075253334976318	0	0.121631095651588	NA	0.0988757949850785
Kif14	chr1	+	0.464908	5.3450205248093	0.478483	5.14495590094778	0.491128	2.55864091479538	0.503831	5.95784662798561	0.473153	4.75320874359319	0.45778	5.18187234381641	0.479157	4.52558670454532	0.492553	5.50954876068237	0.480616	5.46025536237027	0.479793	5.41092859372008	0.471123	5.61926150306988	0.476705	5.99585653726424
Kif1a	chr1	-	0.452381	0.568732803822625	0.563953	0.757456255992887	0.372093	0.404687486434256	0.506024	0.802963579717171	0.218391	0.597064501881004	0.442857	0.667600023916772	0.402299	0.557654381585746	0.521739	0.728058907886929	0.350365	0.609631359823967	0.546341	0.784526489578182	0.4	0.473582077908599	0.509434	0.625660618688257
Kif21b	chr1	+	0.6049	1.46326861548647	0.548257	1.5222787986888	0.589404	0.757680557193429	0.570304	1.79797422797553	0.624758	1.18539605936389	0.568182	1.38183679329213	0.545985	1.11967284270644	0.612167	1.61691579884019	0.591584	1.35165932903055	0.553781	1.82380204202133	0.533416	1.48449983562989	0.548523	1.81678905852569
Kif26b	chr1	+	NA	0.107575272429031	NA	0.088325577716167	NA	0.0712990894273979	1	0.144799840849668	NA	0.10886735281167	0.307692	0.111121991812917	NA	0.101637174588958	NA	0.0893689987890986	NA	0.134409507933756	NA	0.0934943101991125	NA	0.120094236768113	NA	0.0862446007979167
Kifap3	chr1	+	0.678776	15.8985278810583	0.630891	13.2290913360745	0.718374	8.97431909668625	0.679356	14.0847534345394	0.68643	15.1319759154929	0.665913	14.0303096101162	0.672785	14.9943053807969	0.671967	14.4847833047414	0.656768	14.9304649835803	0.682341	13.9167632344039	0.686483	14.9006629390677	0.646798	14.3585555245657
Kiss1	chr1	+	0.797297	0.232361783511543	0.547445	0.253027814837581	0.738739	0.316942352760145	0.607143	0.2950444319681	0.666667	0.137399120579586	0.627451	0.273042684288833	0.790476	0.319158102085328	0.636364	0.285874974142308	0.852632	0.256934735358533	0.587097	0.303421210751452	0.774436	0.219597474622893	0.519685	0.554092585704553
Klf7	chr1	-	0.591346	0.954834141665437	0.522968	1.11747987096514	0.669355	0.377711400595967	0.585139	1.40177130026728	0.590909	0.812112158944796	0.56705	1.22282749259379	0.518987	0.68734196600863	0.577922	1.37383826892146	0.606061	0.853189771238873	0.520833	1.29194395617117	0.479592	0.788185057114071	0.527473	1.22946671816377
Klhdc9	chr1	-	NA	0.271260485629329	NA	0.120342497300801	0.3	0.475413529140218	NA	0.16839121239155	NA	0.317406330816257	NA	0.176240966078419	0.357143	0.335546194618592	NA	0.117836269829391	0.5	0.343689375422428	NA	0.17637899649373	NA	0.241021618488541	NA	0.114579060670613
Klhl12	chr1	+	0.569507	4.68963898457162	0.533367	4.68180285772708	0.52	3.48472484492387	0.510997	4.60343366268255	0.524918	4.78525661082149	0.512793	4.61264135826514	0.490148	4.69485909501947	0.517917	4.81605628662925	0.520452	4.62187426379102	0.512598	4.88781525740762	0.524268	4.82557501035955	0.541289	5.60686474578597
Klhl20	chr1	-	0.482927	3.23484164396606	0.528926	3.50264393171288	0.525581	1.23325533370646	0.521472	3.69627034420427	0.561644	2.82583615830584	0.552419	3.59972207511304	0.516194	2.78164657370531	0.574074	3.55281599373708	0.503472	3.1714150171047	0.524871	3.41463606501255	0.506239	3.21817047907891	0.534759	3.69061767611043
Lactb2	chr1	-	0.488595	35.2135108909897	0.518332	32.2344468843185	0.476898	20.5702250643889	0.50565	31.8956083733525	0.468901	33.4247283784189	0.505261	32.1983676147814	0.488415	33.5331994604277	0.499582	35.5375275017563	0.486089	32.5836228670488	0.51723	35.3742991687865	0.493876	33.4966946819484	0.508106	39.549921369361
Lad1	chr1	+	0.538012	3.55869526906222	0.425509	2.87603321535681	0.488268	5.68538649848272	0.496148	3.88814759114009	0.459436	3.87145114522158	0.486545	2.82234356501111	0.495516	4.70795748587869	0.458986	3.54301671629512	0.452222	4.17525084942101	0.45747	3.86481279835785	0.480512	4.58713289490209	0.395802	2.60420681047965
Lamb3	chr1	+	NA	0.142039334748435	NA	0.220308700849963	NA	0.139345344747995	NA	0.191778880779265	NA	0.10558750152914	NA	0.192340413070459	NA	0.146835896331453	NA	0.19222627571638	NA	0.154769953734289	NA	0.213470190897453	0.4	0.162805024289386	NA	0.188989600071643
Lamc1	chr1	-	0.52401	59.5965762861215	0.513487	59.7651576292491	0.522052	23.4884858830169	0.530534	58.8928089517199	0.529811	55.7434643707405	0.523161	59.4772353520604	0.537743	53.1397082483789	0.517884	61.3869437130813	0.520706	65.532404752169	0.521375	60.1227368439336	0.532416	64.211952808327	0.534505	55.2332184958426
Lamc2	chr1	-	0.31241	2.08923800492534	0.237743	4.12637722667084	0.285714	1.5124052238129	0.222127	3.2199957969974	0.309987	2.06437093929148	0.263289	3.16576041592933	0.304938	2.17078326978748	0.243139	3.45721312179822	0.287229	2.37867383002691	0.269981	3.57835603402302	0.29798	2.35891776602313	0.25241	4.79649982950118
Lancl1	chr1	-	0.384798	4.21481184697435	0.394872	4.67373306590856	0.357863	5.03302424205328	0.379777	4.64673270100865	0.367973	4.52891994801992	0.414698	4.55052479542882	0.420185	4.63209411573818	0.40146	4.6113803529672	0.384259	4.47848840048483	0.423836	4.51912506617796	0.404422	4.52313842527935	0.404082	4.58575685870972
Lax1	chr1	-	0.62	2.32520051902218	0.704403	1.74894929614889	0.55	1.61957679524337	0.632911	3.12460870286529	0.636364	2.19209530567449	0.622378	1.87766468840585	0.678161	2.04847253049136	0.587786	1.7431068691856	0.583333	2.00984108843824	0.593548	2.03943119127793	0.678161	1.97865979191394	0.62069	1.62355898961503
Lbr	chr1	-	0.503678	64.5671196309015	0.502165	77.4778503172234	0.501537	32.8301950129393	0.492696	69.321721109807	0.491023	58.1451087507285	0.503126	77.5981459063125	0.50552	52.1520829648239	0.512663	74.8320647079417	0.497532	52.0734521567886	0.510253	72.9012742504444	0.499557	50.9147883915514	0.490516	80.3482522316793
Lefty1	chr1	+	0.589864	51.2854105860289	0.630049	39.7974755388481	0.568092	64.8947580135256	0.627711	32.5744828874924	0.558075	48.8793854419543	0.594466	34.6496957370216	0.575018	44.2589502555631	0.619722	29.320885430944	0.563496	34.5336616777316	0.620562	27.0208554729313	0.588621	26.5649238541677	0.632061	27.8636462106992
Lefty2	chr1	+	0.574952	169.692190009456	0.587934	140.950253856377	0.524941	159.152644924077	0.580574	114.457984310169	0.574231	174.792384839404	0.577372	128.493906647208	0.569545	167.214398299905	0.589846	130.951037360626	0.581533	145.576031511016	0.568192	123.210103464649	0.588732	134.523596291613	0.578263	123.066073437252
Lemd1	chr1	+	NA	0.207265191816249	0.875	0.163028471504244	NA	0.126415267195213	0.1	0.163184441132448	0.477612	0.275580082578585	0.9	0.185139341909055	0.787879	0.202338471652546	NA	0.249331972280259	0.626168	0.254920733806343	0.452055	0.270283002299805	0.72549	0.230424866524851	NA	0.171038450971132
Lgr6	chr1	-	NA	0.0753963282361932	NA	0.0484191308206202	NA	0.0738344759896645	NA	0.0659511083222811	NA	0.0743050272584101	NA	0.0253132550899379	0.225806	0.0835746073771826	NA	0.049472101787056	NA	0.0955277983098911	NA	0.0528732090841397	NA	0.111449484639293	NA	0.0364793237680252
Lin9	chr1	+	0.541394	4.1098152096916	0.544465	4.41995302174869	0.6	0.965134091598017	0.527978	5.07435693494247	0.46327	3.6582556498529	0.537072	4.41293365421976	0.493792	3.52761344004223	0.518308	4.58133983271405	0.528998	3.67787274381046	0.532544	4.51422124626319	0.471767	3.89818863289717	0.483799	4.80539265907494
Lman2l	chr1	-	0.514905	1.87390396266524	0.523327	2.14016351498171	0.600917	1.50486244704338	0.541379	2.34106270120437	0.474926	1.81042605726938	0.55098	2.2917791830287	0.524324	1.69649510521426	0.554241	2.13589278479239	0.53012	1.74794570128098	0.573554	2.16582574251385	0.508009	1.64648868865236	0.542199	2.34089115839715
Lmbrd1	chr1	+	0.241206	1.40506930516166	0.50565	1.53179472938838	0.292135	0.712322620003715	0.283668	1.49909303653429	0.4377	1.41298133495554	0.401434	1.50579571722236	0.438953	1.34913913153318	0.346875	1.37194086164476	0.428962	1.45746336406765	0.423358	1.43770404899741	0.412017	1.1929006440253	0.512077	1.50359256066203
Lmx1a	chr1	+	1	0.230458402374522	1	0.335507729744884	NA	0.255345782435735	NA	0.175966723353413	NA	0.209861377634368	1	0.23830933929096	0.8	0.285888971302582	NA	0.182973452236667	NA	0.213738717847119	NA	0.264823459560454	1	0.224835223575913	NA	0.294369666825371
Lonrf2	chr1	-	0.901212	2.07076546049196	0.810855	2.21738124225771	0.885033	0.919411509325792	0.804667	2.10880118625065	0.896486	1.87573256446824	0.79613	2.47601416931807	0.91609	1.74121026917055	0.80061	2.77515054501456	0.914309	1.88492615618256	0.803021	2.55607913645561	0.951974	1.47416434203282	0.870759	1.62912617798425
Lpgat1	chr1	+	0.555377	7.3203788119762	0.53134	10.7022785824055	0.498069	2.30984754618008	0.513974	9.94024464317651	0.549583	6.1752767020302	0.540021	10.0212790270246	0.526703	5.4531999187578	0.53148	10.1973218601645	0.562064	6.78931890692118	0.553341	10.2011261001009	0.547539	6.23221095752038	0.53415	11.1025965504855
Lrrfip1	chr1	+	0.39781	3.16490600920931	0.397655	3.70541614017984	0.399103	0.991394111624909	0.400783	3.65900704611223	0.368112	2.88015658493641	0.432128	3.58110527548985	0.408492	2.45903201795284	0.397253	3.83345568974159	0.373694	3.37168008101072	0.37688	4.19772543172291	0.395997	4.30715207529787	0.410445	6.72498142202772
Lrrn2	chr1	+	0.85553	2.34246766699063	0.847162	1.23564848881462	0.841969	3.49756245304603	0.840989	1.35818923633938	0.89013	2.67427882610777	0.907895	1.5637647666118	0.88125	2.71794862179202	0.898734	1.52810710100225	0.846271	2.69430375634819	0.897196	1.42454640764022	0.851064	2.69490998203416	0.864865	0.670359216435326
Ly96	chr1	+	NA	0.321946550905807	NA	0.268392873133301	NA	0.371576881737408	NA	0.385436105150883	NA	0.370383581514805	NA	0.283090288314013	0.833333	0.487646071746436	NA	0.27663513658433	NA	0.233090889937161	NA	0.269146402093273	NA	0.465864965752386	NA	0.437106210883483
Lypla1	chr1	+	0.614449	16.6276075985468	0.642941	14.8061111608843	0.690304	1.38052902765588	0.603707	14.4160815445062	0.621788	15.3976132863225	0.595373	15.0221435570724	0.62446	13.9401290668418	0.612357	15.2488391910554	0.648074	14.2841441204608	0.595649	14.6061535178355	0.598254	15.1676236964654	0.611848	19.8276907613846
Lyplal1	chr1	-	0.744186	4.01733684990964	0.652695	3.00699024819338	0.626761	4.09855871382986	0.672515	3.4175045168016	0.726908	4.32284799709425	0.634146	3.47098652964836	0.617978	4.63021953804779	0.607306	3.32024398041555	0.655629	3.8608595974788	0.680769	3.52244849807201	0.536765	3.98991076990682	0.596491	3.00917433178711
Mael	chr1	-	0.807692	2.02320402215705	0.916667	1.77265476049802	0.928571	2.22042533459949	0.875	1.55592098312548	0.9	1.8883742790068	0.846154	1.79291877204993	0.727273	2.2840154541617	NA	1.57275774868298	0.83871	2.01182455272278	0.909091	1.58568076478495	0.95122	1.82736017399697	1	1.79235237826415
Map2	chr1	+	0.583466	1.52445017765351	0.683267	0.999559086153931	0.740741	0.460182029969636	0.568665	1.15633955837361	0.646847	1.33430114952151	0.657194	1.21946876984506	0.596831	1.21679390224178	0.669596	1.29039468995762	0.606771	1.34408661270233	0.639445	1.28712830769101	0.625	1.19775343353497	0.579487	1.18510232090156
Map4k4	chr1	+	0.614102	23.1988594199471	0.616113	27.887579875356	0.604789	10.893367228722	0.616865	24.3254662797136	0.607526	21.4822120359768	0.610889	27.0885621429081	0.596535	20.2449990593054	0.612727	26.0669211441509	0.596451	23.851995612354	0.607939	26.1643910055118	0.606819	22.3932341151387	0.600224	28.2596197183661
Mapkapk2	chr1	-	0.500653	11.169494993664	0.477725	13.3222763949653	0.476648	15.475562397103	0.477553	12.8018236378388	0.504751	11.7945336322545	0.496203	12.7314248425436	0.491713	12.2138583651043	0.518672	13.2027234605186	0.487716	11.703642283622	0.475667	13.0823166388312	0.505172	10.2737822787071	0.514898	9.88549402393251
Marc2	chr1	-	0.511643	11.1994147882401	0.534383	11.2830786124029	0.511214	22.2326287053227	0.50326	11.4464421260523	0.497536	12.6599478045916	0.535855	10.699839228248	0.486312	13.9173924051292	0.513989	10.8371929517301	0.492486	12.2259863813592	0.53393	11.9971605487771	0.511942	13.0552007171418	0.535586	11.4341709688394
Mark1	chr1	-	0.44	4.7719999236365	0.429958	4.49298632917173	0.487889	2.95288990918681	0.43156	4.69109809568233	0.418564	4.81483612488328	0.410843	4.28310862052195	0.439148	4.26335437193321	0.407738	4.58096926539859	0.413298	4.32155111829753	0.465405	4.48477353393679	0.436845	4.31028101016009	0.412308	3.63503385164166
Mars2	chr1	+	0.474672	4.26036005266861	0.457721	4.10304294644673	0.535294	1.36764525958612	0.469489	4.1709783994663	0.484255	3.61105702613175	0.485538	4.16508555480705	0.515088	3.28867923572535	0.476385	4.15764068334911	0.478814	3.92358382363482	0.463117	4.08324603319324	0.487565	3.69172248222285	0.43509	4.25974593354325
Mcm3	chr1	-	0.492762	165.884778637991	0.487984	156.803333023111	0.470787	181.831990284953	0.489902	153.878630579037	0.486905	166.484621663297	0.476689	154.331846578909	0.478806	171.032420620297	0.485716	148.384974897986	0.483645	168.042584301557	0.475562	149.240900667372	0.492293	159.252182241501	0.479325	138.933701191394
Mcmdc2	chr1	+	0.473354	1.36524866458202	0.366714	1.46273686062293	0.409611	0.861144587266155	0.472986	1.79356692287951	0.439797	1.34235875105797	0.508455	1.59516544449544	0.478098	1.19295860571549	0.470452	1.59937286919576	0.423313	1.19877903973125	0.424859	1.56874476048899	0.441948	0.937298145994367	0.464567	1.37898882136309
Mdm4	chr1	-	0.495749	25.9235857389387	0.509568	24.1377044971786	0.502066	9.70675043028565	0.50012	29.663545478079	0.509423	21.9900046224661	0.491979	26.4327148943125	0.512237	18.9945872543819	0.511703	27.7042948147013	0.512063	24.9090623193428	0.519224	28.6669754517117	0.501329	24.8327971089875	0.510578	30.1198943064709
Mettl13	chr1	-	0.463812	3.60623579494239	0.477784	3.15845736712196	0.444964	4.52570250737998	0.526713	3.46722039775999	0.474609	3.60033054078294	0.520442	3.54765465002741	0.495096	3.71114681825214	0.476496	3.40586278485195	0.494205	3.69928643859881	0.509154	3.32276858646615	0.481446	3.28476337502654	0.516207	2.87932003409121
Mettl18	chr1	+	0.559633	8.24535991232929	0.476636	7.57829175767679	0.584906	10.2209195478341	0.445783	6.47358294722975	0.530769	9.01712377979475	0.576087	7.04917270535466	0.564972	9.26338988431929	0.431579	7.22445549326877	0.535714	7.70740524300478	0.518519	7.5787118146121	0.503817	8.44673775983378	0.505155	7.05561649450358
Mettl21a	chr1	-	0.623656	2.48464374269065	0.578616	2.72133309408845	0.5625	2.5911223894371	0.623494	3.0217459058691	0.676647	2.7201694591112	0.660661	2.71721928732551	0.678679	2.60955559675092	0.641834	2.98892987939857	0.686154	2.36401866521842	0.662562	3.20896118418912	0.614286	2.26598285960289	0.624506	3.13068123223219
Mff	chr1	+	0.585581	7.35551794100007	0.544371	7.52540560666938	0.67501	7.16185120089635	0.549914	7.34809715138296	0.571429	7.65321088194845	0.5763	7.62357330093892	0.608934	7.31240703135911	0.540812	7.97369380833954	0.573684	7.16859959169159	0.554092	7.92695298815087	0.550201	6.60041543458878	0.525891	9.02176288248294
Mfsd6	chr1	-	NA	0.116002528981403	0.635593	0.376728935832166	0.818182	0.0658451492187885	0.632653	0.293947559216524	NA	0.120160141759623	0.64557	0.356421713199048	NA	0.101319416929773	0.6	0.271086301564275	NA	0.0939683933342224	0.717742	0.298954616570585	NA	0.132302742881172	0.827586	0.516175118611419
Mfsd7b	chr1	-	0.571429	3.8247458725007	0.528025	5.63586833238097	0.616438	0.998028633319661	0.556657	5.52376520586397	0.581818	3.34328128634547	0.538061	5.57189712188275	0.551143	3.13042497733992	0.530742	5.03566254432587	0.574503	3.08917242952609	0.573569	4.60112643999245	0.580336	2.64025984362128	0.598592	4.02406884304537
Mgat4e	chr1	-	0.647887	1.32433071879805	0.657895	0.960456017674966	NA	0.157779162509417	0.538462	0.716030319066688	0.576923	0.952708187923957	0.675	0.954510297723839	0.707317	0.849288071870072	0.766667	0.855658751753239	0.581081	1.22760141758417	0.512821	0.79090470619092	0.6125	1.42115046895689	0.692308	1.08160882064708
Mgat5	chr1	+	0.597561	1.60162565618592	0.620643	1.35802986074474	0.602434	0.812790363588863	0.623295	1.74063886700092	0.595051	1.47411325469552	0.534038	1.48856911588147	0.564904	1.24943372448854	0.613566	1.50402849091464	0.536634	1.40141282642367	0.628541	1.42010325681116	0.619048	1.43767955060177	0.62116	1.43109703267877
Mgst3	chr1	-	0.24183	5.83588740922017	0.290323	5.08800416363008	0.34633	12.1700662947271	0.350427	4.71667657559213	0.352657	6.4304184072789	0.341085	4.65038377767176	0.279352	6.53561313149025	0.354331	4.351241219917	0.269962	6.33471770271155	0.367232	5.39713590281958	0.296804	6.75487436980392	0.391753	5.41888977053448
Mia3	chr1	-	0.41838	9.65799517952716	0.360786	12.7918665767923	0.441931	5.07193598499579	0.378795	11.9700145303174	0.386335	8.62964553021781	0.373094	12.1393472830056	0.403789	8.36552929189667	0.39324	12.2959916772527	0.39939	8.44041260529248	0.407623	12.0257103968715	0.386877	8.83058389150448	0.379941	13.6655402115137
Mir1981	chr1	-	NA	0	NA	0	NA	0	0.416667	0	NA	0	0.625	0	NA	0	NA	0	0.6	0	0.68	0	0.424242	0	NA	0
Mir6904	chr1	+	0.561404	2.80347486972135	0.428571	3.44419950943095	NA	0	0.54321	2.39294245270844	0.770492	1.08542375639098	0.686567	3.45116638052068	0.45	1.48622877388988	0.467742	2.5293535025606	0.583333	1.953614764839	0.549296	2.98288712659139	0.666667	2.98914771426983	0.666667	2.3979516249602
Mixl1	chr1	-	0.5	0.450340230816181	NA	0.238909436328771	0.6	0.456761734187027	NA	0.349448876049402	NA	0.526245990347883	NA	0.239392698474435	0.875	0.656541884804124	NA	0.301651683700467	0.761905	0.534275005633428	0.333333	0.34303527030684	0.272727	0.46925319119504	NA	0.186762869947496
Mob4	chr1	+	0.464516	11.9966685435225	0.477273	13.4155295309931	0.422535	8.13422266500918	0.42515	12.6358384138402	0.392308	11.569834754323	0.524229	13.6123367468346	0.535519	11.3421755512655	0.485849	13.0052445445683	0.482759	10.9115630842662	0.485944	12.6735071193933	0.497585	11.2382795751242	0.524038	15.2849316542462
Mpc2	chr1	+	0.495192	1.6645950152949	0.54955	1.68891931962666	0.589928	3.01833213639594	0.596774	1.61946610435824	0.524229	1.99632839900929	0.557789	1.73169228107553	0.569659	2.09317129451795	0.5625	1.65182328128257	0.580205	1.8714161043903	0.514286	1.60727718562886	0.533074	1.68393945817849	0.486486	1.73312374540023
Mpp4	chr1	-	0.427332	0.0132969571195902	0.484018	0.091889614194874	0.471668	0.0332513497657182	0.446269	0.0515899580179249	0.413153	0.0144149438410695	0.514208	0.0675220238154045	0.490698	0.0158607523477205	0.380952	0.0459877029053505	0.460133	0.0252710390725444	0.475561	0.0654341036636348	0.442553	0.0354440211057763	0.447217	0.229998443490841
Mpzl1	chr1	-	0.43165	23.3291885185824	0.424131	28.1666999705155	0.454228	25.0528198733456	0.406718	29.8483569600449	0.4373	25.307740304012	0.435885	27.0634634603169	0.430904	25.4167623094775	0.439968	26.6731014254181	0.440427	25.2432542176227	0.417915	27.3320687034727	0.429389	25.1716234270342	0.431964	27.0184977596571
Mreg	chr1	-	0.675226	60.6851863719583	0.677465	56.2442944681371	0.634049	28.158468573594	0.68283	53.04247825518	0.661193	59.7388911850395	0.677001	55.8455459115002	0.681132	60.0341420535494	0.671887	52.4142252612674	0.662222	59.6787942920099	0.671806	51.8829236369351	0.669761	66.6187974546435	0.669177	62.331460498485
Mrpl15	chr1	-	0.562956	21.9953474613319	0.573551	17.3081221591709	0.560841	36.6082421606965	0.587575	17.7866494621827	0.57819	22.9403869684063	0.566899	17.5951488163121	0.562092	25.1509896799564	0.573604	18.080839280087	0.56385	21.4893857401807	0.582236	18.341091801402	0.563093	21.7422458278272	0.592564	16.1434700698474
Mrpl30	chr1	+	0.55	17.0792393385794	0.857143	15.0887246991257	NA	37.8506390735994	0.382353	15.3477796678687	0.423077	18.295816703665	0.621622	16.0779181137466	0.433333	19.662355189351	0.489362	15.667525946464	0.366667	17.273519760769	0.52	15.1702140431843	0.5	16.7191551564019	0.555556	14.5423203939
Mrpl44	chr1	+	0.498765	28.2301449840073	0.484292	22.7655773915455	0.509484	33.9666194073915	0.486158	24.4161112303061	0.491277	28.4346692036156	0.500672	24.2532869121955	0.488468	29.9140832069502	0.483691	24.6108095896199	0.499249	26.6214041163578	0.479887	25.0728536986525	0.473917	27.1964259264717	0.523966	22.1405356407602
Mrps14	chr1	+	0.545455	14.7302899193754	0.8	12.138345393562	NA	19.9732050996306	NA	12.6246777527595	0.4375	15.5089664020903	0.5	12.2649214975322	0.636364	17.0737829252774	0.3	12.8911888738802	NA	14.5764475493513	0.578947	13.6525109513517	0.181818	15.2794143415559	0.4	12.2406590041877
Mrps9	chr1	+	0.503814	9.63119854384492	0.475124	10.0805438444299	0.510753	15.9779532890946	0.500263	10.4477061068775	0.499345	10.3324506517623	0.466462	10.2413646795193	0.503726	10.8704817601983	0.484732	9.8559055721704	0.496033	9.4422094145061	0.488894	9.53014450597232	0.501428	9.81729886549405	0.465859	9.96804823975105
Msc	chr1	-	0.92278	1.51854888776573	0.953846	2.62280324484627	0.954733	1.65330376551747	0.940433	3.01693940807978	0.910891	1.64527390442422	0.928899	2.36132436561942	0.948586	1.70622974370911	0.913669	2.05787313475874	0.912195	1.649822995187	0.926316	2.05564096388452	0.957895	1.20450853617781	0.969466	2.0473739020128
Mterf4	chr1	-	0.471986	4.89389238625108	0.444649	3.7814481286313	0.477218	6.88560418167757	0.425081	4.03990889891984	0.466954	5.53255170991393	0.450512	4.10439832099986	0.448733	5.41242732483462	0.44204	4.40197563579608	0.4156	5.11098319188868	0.399199	4.39584669095535	0.439633	4.88951212562447	0.38404	4.00988019361374
Mybl1	chr1	-	0.467742	6.02117413630485	0.5	7.44624043098385	NA	0.461508431471918	0.485531	7.78135175948212	0.481928	4.55026034565532	0.518395	7.50143147880021	0.445378	3.58069158366964	0.494196	6.9094848757703	0.454348	4.43414858046852	0.47931	6.54370173168494	0.516043	4.11287939558889	0.517241	8.38705997815586
Myo1b	chr1	-	0.574036	10.0962459388493	0.586294	10.5095637458595	0.596224	3.61247322494574	0.568857	9.81178569620676	0.568737	9.17263535511115	0.606433	10.3607543618417	0.55976	8.95591584924113	0.575068	10.247510560778	0.558858	9.99509481348801	0.563669	10.3519339837127	0.597915	10.5232810946488	0.599962	12.6210449118267
Nab1	chr1	-	0.520231	1.55000250825529	0.590062	2.00860885110213	0.583333	0.528752608019364	0.670455	1.73124876473223	0.604762	1.46511028112657	0.686347	1.78003375739203	0.697872	1.32972163410282	0.658824	2.01844465889298	0.632768	1.721043641282	0.635328	2.0594653008777	0.644279	2.12484658859498	0.647222	3.00861697508895
Nabp1	chr1	-	0.613309	2.51607855796107	0.566038	3.66080451947114	0.548387	0.552728367604772	0.581368	3.58119640304777	0.645089	2.09150352155224	0.548619	3.55426885932213	0.575758	1.84114940439268	0.578631	3.5064594086549	0.620619	1.78111282567704	0.589411	3.5247156910518	0.663043	1.93839088802218	0.59724	4.72858803668343
Nav1	chr1	-	0.457944	2.93460505877688	0.443027	2.209690459265	0.428922	1.58178101326951	0.47355	2.92969589080631	0.451444	2.72770509155342	0.406138	2.43215181437145	0.463898	2.44152351272187	0.44997	2.81171246168066	0.491581	3.13247793082329	0.436119	2.90271438519912	0.474628	3.58591266585123	0.446228	3.01564432746942
Nbeal1	chr1	+	0.532967	1.85690822550622	0.450029	1.42445914409091	0.41958	0.157529520713667	0.500505	1.7818625506727	0.516045	1.24883458723781	0.47329	1.62601981291014	0.483321	0.940069355082173	0.477894	1.64554865921718	0.474961	1.59321036736965	0.462588	1.57711071603607	0.486036	1.52452734324887	0.466632	2.1654439330917
Ncf2	chr1	+	0.706806	0.570499530430145	0.670918	0.888014815130619	0.797297	0.600911934214033	0.682415	0.935233079374608	0.709402	0.535260632309435	0.692308	0.821626320274055	0.744	0.574055425654537	0.77665	0.896173196835923	0.831933	0.502470605732786	0.699411	0.885467651026593	0.777328	0.546273972611089	0.679245	0.932788159949196
Nck2	chr1	+	0.806452	3.33433113807506	0.732877	4.1438629339057	0.902439	2.26277631243303	0.732143	3.82455732524198	0.774775	3.37253708658028	0.794118	4.12629354115453	0.864407	3.42262139778373	0.741935	4.01952405842758	0.727273	3.52304453858008	0.777778	4.20006242069965	0.706422	3.12996642954085	0.785714	3.85478423831362
Ncl	chr1	-	0.491083	423.97278645906	0.489631	345.054835776106	0.498766	437.503079980828	0.493471	342.561430408547	0.492572	432.983995655442	0.488811	363.486993785425	0.496244	444.886000517738	0.489375	355.176421716676	0.494089	427.282384514563	0.494996	346.759347534645	0.496996	415.128139442335	0.495015	325.55007290369
Ncoa2	chr1	-	0.502058	4.39001068161748	0.532605	5.4824634356465	0.583113	0.703364013001081	0.511355	4.80155859364672	0.5	3.69428506760606	0.527585	5.67925865718524	0.49977	3.19813067887459	0.522833	5.50100429241688	0.516938	4.35363996143617	0.514269	5.28477036685438	0.506083	3.97869854865276	0.500894	5.14246822286673
Ncstn	chr1	-	0.480303	12.8057089835297	0.511249	15.2534715003522	0.583884	7.1035751320136	0.462485	15.5725416117949	0.530476	12.7700446267624	0.506832	15.1679847696331	0.507876	12.2185765180229	0.513595	15.333715116194	0.490641	12.5189510673367	0.493069	14.7564739373223	0.521912	12.076203764828	0.473646	15.2601552661967
Ndufa10	chr1	-	0.552234	29.5339049901259	0.554885	28.5031161781208	0.530025	50.9484594188657	0.541716	29.0978824214472	0.525588	30.7617108599752	0.541349	29.0944152863386	0.54696	33.7803603936365	0.526101	28.4267517442913	0.543786	29.814312148473	0.529808	27.0816107304916	0.539603	31.7642374122717	0.521452	26.1635007443454
Ndufb3	chr1	+	0.4375	43.778421791505	0.451528	43.6269032880378	0.416583	100.22564589295	0.426453	42.6749482231019	0.453089	49.1430940357504	0.465929	42.7491750406256	0.462832	57.5701818454859	0.438912	43.5327263376486	0.423522	46.8017943431291	0.447045	44.4955474340638	0.431682	51.5118689488931	0.460388	47.050066709227
Ndufs1	chr1	-	0.428669	23.9107814595544	0.439438	18.985159471244	0.439064	16.316338130821	0.437943	20.2062744581626	0.447122	24.6266622672811	0.438422	19.733103330533	0.4472	24.4710113288607	0.457831	20.0830386577446	0.447771	25.1200691475582	0.437339	19.9797826520167	0.425044	23.8452549404142	0.433028	19.0877265673206
Ndufs2	chr1	-	0.537807	91.9674294973118	0.50444	80.175358262582	0.578526	133.692532803778	0.540265	81.7420790106422	0.49845	98.1970155163596	0.545709	78.2756763893193	0.502621	105.81436432808	0.529121	81.0577787036906	0.494776	97.9106294735628	0.506547	84.1201090480772	0.517647	99.4221157868535	0.519369	72.5016071886774
Nek2	chr1	+	0.509096	26.6158878828526	0.473557	26.6958351950749	0.465089	14.3053573179375	0.476698	27.8626346125602	0.522929	27.1376128556455	0.470558	26.5226263069865	0.503463	26.2614254805339	0.503853	26.7402867697541	0.492186	28.670543344196	0.497142	26.2595291110846	0.496224	28.5874482143157	0.488424	25.7770359857909
Nek7	chr1	-	0.424	6.39818263125974	0.453094	7.28168495118542	0.376344	2.35863376970677	0.453922	6.58017884322348	0.471865	6.05765344998417	0.465763	7.13771133849537	0.467406	5.77301448239186	0.453564	6.98261251578521	0.475269	6.07386477647975	0.507692	6.79578908464744	0.47252	5.71888271425048	0.45	7.81483562904862
Nenf	chr1	-	0.389381	4.7886398577709	0.269841	4.91767401317083	0.32	17.5057256646483	0.334884	4.65541940781148	0.329167	5.27293594647832	0.393013	4.22645788463529	0.351515	6.07260658388229	0.427562	5.29107573435465	0.37299	5.75720361904832	0.372414	5.1175408519553	0.372414	5.33071389879724	0.384259	5.14852207227902
Nfasc	chr1	-	0	0.293246708565469	0.636364	0.262043440053427	0.245283	0.254158862308825	0.524752	0.349310080197736	0.301724	0.247809648560553	0.484848	0.253378316448974	0.50641	0.259590948355723	0.492958	0.298518550234456	0.509202	0.242276104645607	0.405405	0.3311463372906	0.351145	0.256623984129828	0.75	0.31424552813488
Ngef	chr1	-	0.409091	0.464972400500947	0.535714	0.354562920048974	0.5	0.707824393961901	0.416667	0.481485312973089	0.272727	0.428332396568116	0.461538	0.384886801207877	0.464912	0.484499162397394	0.487179	0.372493993196132	0.5	0.441843032019808	0.25	0.358252000607263	0.44	0.355798520342905	0.538462	0.278856972292284
Nhej1	chr1	-	0.575163	4.4522089724421	0.660079	3.65079756810825	0.68254	9.74385116880049	0.645161	4.05445941511512	0.62069	5.38595423162306	0.635628	3.72281453927365	0.615385	5.56671108288362	0.707006	4.26950949753931	0.663636	4.74694392607895	0.668367	4.33492473965059	0.591241	4.31043522414972	0.608434	3.57667044199986
Nif3l1	chr1	+	0.573068	8.18023246610834	0.611536	6.17553446111642	0.579736	9.83921670047454	0.573826	6.78911566407761	0.570458	8.66347966301624	0.590728	6.4449298485387	0.571065	8.9549686984047	0.572516	6.88192352733601	0.561871	8.75087546280387	0.569705	6.49562288349632	0.587225	8.81659957497937	0.602357	5.97653413355652
Nifk	chr1	+	0.50763	70.4492547541836	0.509445	54.6737094072942	0.467953	101.397842691971	0.516402	55.7121064572582	0.471434	76.2096733555928	0.485309	55.7330439477177	0.474122	82.1639643479912	0.516937	56.6541931834568	0.510972	71.3412390231816	0.51566	56.5043640513405	0.479922	67.24175251949	0.497268	49.4116338991586
Nit1	chr1	-	0.461712	4.30354992673568	0.421182	3.59102492444674	0.49467	3.67761090100519	0.416465	3.9718292778421	0.447788	4.5002390795185	0.488479	3.87958824111959	0.514663	4.67904414626555	0.449791	3.78253396950411	0.521407	4.47791608119994	0.421252	3.82424334191568	0.492138	4.99464037171485	0.544444	3.72447460754327
Nme7	chr1	+	0.437903	4.00641813694239	0.438298	3.3970146795281	0.407445	4.38422537730601	0.434855	3.52721701898855	0.435967	4.11637169369772	0.423488	3.25139987861895	0.47107	4.59460568643634	0.411159	3.42480748889513	0.515687	3.98735566281724	0.44051	3.69878511336394	0.469121	4.29448349282946	0.460843	3.73372911757994
Nmnat2	chr1	+	0.423552	4.07767141360526	0.372937	5.38133831628883	0.454464	3.17814067586107	0.331274	5.55425608910409	0.487569	3.54999846593785	0.373346	4.72725768587646	0.441847	3.53757026592658	0.356362	4.96390911682827	0.448991	3.77294558797066	0.317588	5.14239730589715	0.415392	4.36505535441375	0.374753	6.53718235085681
Nop58	chr1	+	0.490098	50.7368015755529	0.477205	47.3567027593786	0.485628	38.6604266758609	0.495352	43.6131344384239	0.484085	52.499015100502	0.493106	47.3463704827643	0.488903	53.1440070509712	0.490851	45.342603606931	0.479807	49.9940514597946	0.480843	45.0810409526572	0.493567	50.6395083302374	0.492101	51.9911338434234
Npl	chr1	-	0.270224	5.57704663869903	0.292308	7.3695953324579	0.236842	3.80716163558691	0.254545	6.87657795680382	0.300081	5.52609359256804	0.291605	6.19361109361301	0.256089	5.82212930906416	0.258065	6.9013366182525	0.269906	5.27249861190652	0.245927	7.15871503306134	0.268053	6.46777972369554	0.242303	10.0802331357477
Nr5a2	chr1	-	0.563895	18.6033773362477	0.581977	20.5348864483452	0.571997	9.27632616224738	0.552189	21.8195535698065	0.570566	17.4023291562876	0.595101	20.3118385624693	0.56759	16.6334988016286	0.588063	20.4112696150439	0.561585	19.340632626077	0.59701	20.0797820354957	0.572467	20.6333027740773	0.582874	25.4077814223147
Nrp2	chr1	+	0.16626	6.82973147605955	0.115833	8.30132936988501	0.192706	3.61863484737229	0.145365	8.09992888828188	0.203855	5.88321307445627	0.145984	7.8519353834978	0.19902	5.467839675297	0.128615	8.43254888893067	0.194709	5.43516798162125	0.132833	8.17252382202971	0.178896	6.08200815165236	0.0934221	7.30668986333201
Nsl1	chr1	+	0.516616	5.79709050155405	0.510735	6.26619590175181	0.485363	4.25155783630882	0.508569	7.51434715516477	0.495726	5.65824465518073	0.479332	6.39060444412959	0.489476	5.71541564482994	0.481723	6.38602536052552	0.50195	5.55808809349622	0.475582	6.27721821243312	0.493785	5.62240760313948	0.480759	6.44307248479153
Nuak2	chr1	+	0.473573	1.76093265254373	0.389091	1.65933317245655	0.549057	1.97708963062342	0.49247	2.13794313521783	0.463458	1.79211215206981	0.509804	1.65900297150349	0.517934	1.84484781508965	0.446121	1.53831365550077	0.469484	1.62097469982397	0.398998	1.65376170365055	0.488756	1.66681205610448	0.36802	1.50279791462216
Nucks1	chr1	+	0.611661	129.475061951106	0.627529	128.782050393305	0.563622	76.6013993658421	0.626759	124.950207094411	0.627646	126.576677741706	0.630187	135.514821985243	0.613922	123.522377498431	0.62945	134.662142447932	0.630605	124.081561580337	0.623446	128.02788387424	0.615082	113.597038283483	0.620019	134.034416151889
Nuf2	chr1	-	0.51286	8.16331708207553	0.525562	8.35650195988906	0.477936	7.8291408873897	0.484039	7.97601741667052	0.484118	7.98454901219991	0.472461	8.04521527220615	0.482601	8.77445701569708	0.497132	8.37623141788544	0.514971	7.72205930724915	0.491888	8.25565522478199	0.491468	7.60182666173275	0.500995	8.97216023631263
Nvl	chr1	-	0.576861	13.1425875115709	0.613082	10.5977346050378	0.579646	6.38755861342293	0.579429	10.4840258971199	0.580155	12.227321148266	0.584534	11.0327524223145	0.582059	11.4228218058182	0.606594	11.4523193266702	0.575931	12.6182935859483	0.599938	11.1813760572042	0.562919	12.0419127632177	0.598111	11.1452244996698
Obsl1	chr1	-	0.79915	3.48660182165791	0.703252	3.73723307759043	0.768916	4.76660036799	0.695163	3.32060364211212	0.741445	3.58162918741083	0.733733	3.70382868831864	0.799283	3.57817432367448	0.718901	3.8562160442566	0.770538	2.90209444999624	0.718864	3.83266823090569	0.798223	2.48803653455164	0.65404	2.2728036175003
Ogfrl1	chr1	-	0.533929	1.04428776259701	0.551873	1.18631945891109	0.671458	0.964663239422017	0.534923	1.12517844764512	0.54797	0.968569034559761	0.512903	1.05149068181945	0.52346	1.01308787121425	0.525	1.16857961744787	0.564103	0.843765163459482	0.505731	1.12908935807459	0.599156	1.02649429961534	0.578231	1.09851491041907
Olfml2b	chr1	+	NA	0.13655051263667	NA	0.237658112353101	NA	0.105067157974769	NA	0.197789398205949	NA	0.178577633846296	NA	0.177436785234363	NA	0.193041669500399	NA	0.177953707651881	NA	0.142253223734348	0.6	0.213898065156018	NA	0.0930185102522174	NA	0.224945165895566
Opn3	chr1	-	NA	0.638219187539807	NA	0.867013761767038	NA	0.264422370624773	0.456522	1.05904448329961	0.333333	0.608245826895518	NA	1.03496655145058	0.55	0.514023059343907	NA	0.878486473075261	NA	0.696665171094988	0.433333	0.855358086451013	NA	0.549625043645798	NA	0.942495129587364
Orc2	chr1	-	0.546211	43.9145040375091	0.557722	36.3836547542315	0.608966	26.6840480345992	0.555078	37.4941882776722	0.575369	44.6484292180365	0.554372	37.266579514262	0.573257	42.659861837483	0.55678	37.7129645691183	0.579358	43.3674665709548	0.546434	38.291856442551	0.574451	40.1701114416084	0.570219	36.2397200463909
Ormdl1	chr1	+	0.546624	4.08014396060982	0.533943	4.1635992796029	0.525	3.40529699157451	0.477576	4.1272150390416	0.530421	4.12474851547735	0.528302	4.14134471341138	0.555556	4.15610105893199	0.508006	4.13684328958383	0.568241	3.64985649558842	0.561069	4.16007805413747	0.466899	3.58958665427407	0.481356	5.00567240902738
Osgepl1	chr1	+	0.45584	1.09749937385369	0.449875	1.15436994294861	0.363095	0.855233903568005	0.526544	1.26854226329672	0.455882	1.10025629186142	0.452957	1.1614070365877	0.463095	1.01448351336346	0.437998	1.26128206014705	0.467085	1.01435300536799	0.47373	1.3147182980581	0.470141	1.07312323738362	0.506596	1.53916566712464
Pam	chr1	-	0.512755	0.875300081430338	0.62931	1.16671099889034	0.617021	0.490684969447278	0.595156	1.11654915822681	0.518182	0.889167604272587	0.543802	1.158133748332	0.552158	0.852000765960378	0.593482	1.12816284363425	0.490854	0.869532706886378	0.561702	1.09342114666566	0.494759	0.751528592516188	0.657084	1.10783267974532
Panct2	chr1	+	0.877193	0.569881117328067	0.752412	1.50176921267558	0.84375	0.280632452152672	0.859345	1.07898894574353	0.818182	0.444812978225855	0.825175	1.27329820298306	0.824468	0.435046577988155	0.801325	1.06944995181082	0.828947	0.473661055517451	0.847597	1.1550995097163	0.918919	0.440527458193741	0.803901	1.8717991324932
Paqr8	chr1	+	0.910238	1.21502641720704	0.935179	1.99992484041723	0.911111	0.582658782251659	0.940468	2.00515163613597	0.936629	1.18202014170828	0.944293	1.90127007210399	0.946315	1.19300461118411	0.932241	1.83475683568426	0.933759	1.365989915582	0.923313	1.82765021749434	0.946348	1.71060350585435	0.927165	2.74537108212361
Parp1	chr1	+	0.538469	169.837938020008	0.541825	147.585583883947	0.522284	130.985813394471	0.54498	154.555444238397	0.533543	167.627898702183	0.540535	154.101131737806	0.527651	171.727620590678	0.539451	153.599527203493	0.535112	167.754584294921	0.543289	148.611023662948	0.540026	167.394636831163	0.547568	131.759178807764
Pask	chr1	-	0.500462	5.73933605273511	0.472481	5.9648374906397	0.524164	2.73378521425464	0.448047	6.31270032467058	0.507707	5.2110403838283	0.445925	5.85088883147931	0.469931	5.11625233051486	0.508706	6.03545808543306	0.49269	5.58058310353863	0.516039	5.85249615141756	0.504747	5.39366300583699	0.512463	6.09233812157535
Pbx1	chr1	-	0.536842	0.313190371925013	0.701299	0.293785690241208	NA	0.139629544169613	0.539033	0.393753460507789	0.240964	0.272108616652017	0.518519	0.294379955186172	0.695652	0.263436841413539	0.45	0.282566886100009	0.488889	0.278486704546275	0.443299	0.25443635044883	0.440476	0.280286577332167	0.666667	0.297867486111183
Pcmtd1	chr1	+	0.551711	8.17922430336911	0.569186	7.67080401149404	0.644172	2.62813514515987	0.541513	9.72336794938622	0.563439	7.55212859176931	0.553898	7.78405546120445	0.527691	6.68936963469013	0.551882	7.98434109476017	0.500774	7.2926516891808	0.556168	8.1901914988383	0.546411	7.87818316081734	0.529833	9.93176257130844
Pdcl3	chr1	+	0.477703	16.513468144578	0.495853	16.0942242897734	0.511238	13.7280586461471	0.5	15.5943185483901	0.488441	17.4474086410688	0.493954	15.6677759338944	0.479013	18.1087235822209	0.473684	15.846078953053	0.474254	17.1565253974993	0.495415	16.4758292780462	0.512538	16.3027312192485	0.501211	15.1730703251478
Pea15a	chr1	-	0.383598	2.51351864992284	0.214744	1.69216037475296	0.363484	3.0975143069286	0.287066	1.80821506757015	0.343158	2.68592480013226	0.305842	1.63195208993412	0.378906	2.41141677131137	0.260241	2.18728044188883	0.304264	2.4716991776473	0.356459	1.96695949865363	0.271805	2.27907029412431	0.285714	1.67371488997625
Pecr	chr1	-	0.859375	7.64051693276082	0.804527	9.57066026280776	0.893665	10.5939444864214	0.833333	9.12391820403938	0.871622	6.8885745679346	0.850123	8.5795404331051	0.875622	7.44695220650679	0.803758	9.40860551441711	0.880196	6.26361039918936	0.78481	8.93144484787596	0.886957	6.07688209457758	0.803175	8.57244858245811
Pex19	chr1	+	0.705912	14.7706015416512	0.729011	14.7250249832675	0.731491	16.1005053643293	0.716972	15.3966017313429	0.747949	15.5130527254824	0.688748	15.489709946045	0.711069	15.5597731493977	0.723018	15.1661207317471	0.711044	15.2710153351523	0.750649	15.4473872548869	0.710084	15.5749580828277	0.704515	13.9395473621867
Pfdn2	chr1	+	0.546495	39.4510329132953	0.531707	35.6432196844437	0.563061	99.26349780294	0.531636	34.5079215236355	0.530979	42.6353554929059	0.544996	37.4313247283764	0.534597	44.4807862275431	0.528931	36.7090327534549	0.557906	41.4540053982235	0.53125	34.938239683642	0.540457	38.3007698653194	0.477118	32.9195993054537
Pfkfb2	chr1	-	0.490876	1.29036880951034	0.466398	1.21480558413957	0.340909	0.306325177171406	0.487157	1.82240168319221	0.44375	0.926336006488179	0.422481	1.21726287323697	0.430052	0.803042966537276	0.490691	1.31020906607803	0.416021	1.13514042355309	0.505938	1.31555026740385	0.435294	0.974929234936624	0.465969	1.32396783802523
Pgap1	chr1	-	0.59761	3.91530387297263	0.572107	3.96271627080652	0.62782	0.845046045475532	0.613195	4.99966653203896	0.627959	3.37195570829848	0.574899	4.30307634063913	0.640964	2.77777643084595	0.63488	4.57733143836254	0.622642	3.76871737574665	0.611136	4.45311862909431	0.642972	3.53937826038845	0.575995	5.16058681399169
Phf3	chr1	-	0.490654	19.4462339561152	0.469504	19.7169651206449	0.454545	6.56680432456654	0.50995	22.095954442043	0.498534	17.0579659521991	0.500752	20.4555027415204	0.467066	14.3971342671975	0.450725	19.6994571082268	0.486228	18.4401258343279	0.433168	19.084841340905	0.471823	18.5144812901349	0.506616	21.0757434765343
Phlda3	chr1	+	0.774584	39.3276214098141	0.720311	51.788090651228	0.736871	109.611026132917	0.773148	50.4662618870634	0.698236	52.1705203674751	0.754595	49.0006409420288	0.716652	53.6928744223408	0.756989	48.5174023466366	0.694195	46.215651400881	0.752363	50.6844469815886	0.693833	40.9634509204503	0.756098	40.7181790713432
Phlpp1	chr1	+	0.553861	4.3606033694507	0.542117	5.3337079173605	0.507803	1.3672363609071	0.523602	5.29732351612204	0.532609	4.01960452818461	0.522529	5.16042527778963	0.489448	3.54869586997275	0.55274	5.13478365507357	0.543324	4.20669506309155	0.522936	5.10955267258074	0.558757	4.28976121264964	0.527887	5.03921831244515
Pid1	chr1	-	0.827057	1.35802605172513	0.838835	1.03068892563796	0.890411	1.00365078374046	0.861486	1.16466009487437	0.895946	1.55912117254281	0.857977	1.01155240735954	0.868577	1.72572675683362	0.809434	1.01095213873453	0.889004	1.54929570324214	0.851097	1.07453015288165	0.896552	1.65117308194791	0.846698	1.05072587993681
Pigc	chr1	+	0.621622	0.987043034523856	0.489362	1.00109710741034	0.610169	0.986175452447096	0.585106	0.915665187946551	0.57	0.961659908779901	0.559524	0.97251838505202	0.439655	1.02798947281084	0.596639	1.18626679270092	0.547368	0.884747204303128	0.567797	1.05510858905739	0.548387	0.9895837256418	0.454545	1.20549573323816
Pigm	chr1	+	0.497835	6.50643194656229	0.523985	6.84853243233743	0.581081	2.76223190282819	0.566456	7.63683102587359	0.526786	6.10553018299067	0.564315	7.09387386575851	0.521036	5.74902860853225	0.524528	6.92837716654314	0.459155	6.43639113837164	0.466418	6.77951328497033	0.5	6.04974472482743	0.556122	7.44399862394977
Pign	chr1	-	0.511353	2.10813955248747	0.518636	2.21298368810725	0.561713	0.632532542485344	0.545727	2.37362865725945	0.504986	1.8315917109683	0.511408	2.18663249079156	0.552093	1.56653924193099	0.511845	2.32271366265544	0.541888	2.0017415279783	0.54704	2.33370600957761	0.513344	1.84878621224258	0.493163	2.45022032655612
Pik3c2b	chr1	+	0.434625	2.07584713590614	0.455645	2.20624804967345	0.54661	0.942695052477235	0.475995	1.79251071245628	0.397041	1.83127215593247	0.45966	2.13874145843827	0.487805	1.7450557481671	0.470481	2.32236200440349	0.480337	2.13458086133495	0.473349	2.33535567913529	0.494078	2.315865410354	0.448485	2.80806645545692
Pikfyve	chr1	+	0.498024	5.0568551649644	0.442444	6.03824953783853	0.553191	0.853298428977783	0.45312	7.02530067352681	0.5055	4.17224127786274	0.505201	6.20197902905077	0.501627	3.34251879384013	0.488864	6.11092981772042	0.483885	4.38892422076677	0.470964	6.04155947856046	0.476923	4.18249878830636	0.428877	6.77531918360232
Pkhd1	chr1	-	0.921379	0.968041243886139	0.947034	0.667208355351592	0.985222	0.359799337567334	0.957726	0.781214152228156	0.931224	0.865972462750838	0.949013	0.752380196906403	0.945865	0.7158642629373	0.933099	0.936547191668477	0.91857	0.943794135011635	0.934732	0.844942904796519	0.914388	0.866834559680179	0.909859	0.651183788581084
Pla2g4a	chr1	-	NA	0.20573145265206	NA	0.248237271011052	NA	0.0452278869843925	0.818182	0.266828009370869	NA	0.232132246946516	NA	0.169595046374946	NA	0.167494331778155	NA	0.220970485411204	NA	0.212254584911171	0.947368	0.259940807239241	NA	0.164517713737195	NA	0.240216228776937
Platr1	chr1	+	0.056	0.991276925436758	0.0897436	1.10474568854599	0	0.217921762452693	0.0163934	1.52960429398371	0.0787402	0.763200853558866	0.0625	1.35975539087765	0.175	0.694428741419071	0.024	1.16265593373884	0.0343348	1.04782649575913	0.0338983	1.22422284343953	0.0805687	1.04937924694643	0.0209059	1.9111137716016
Platr12	chr1	+	0.562874	3.21302018319968	0.483444	4.08455218990282	0.738095	0.951870776236835	0.514541	3.80778967676767	0.467105	2.63432703115307	0.517065	4.69563197437474	0.674312	1.92650977318026	0.431005	4.94510358673873	0.553734	3.8140424368137	0.487544	4.37385061447844	0.474614	3.72351502799103	0.470909	6.17255385349249
Platr22	chr1	+	0.52381	1.15193285592086	0.713514	1.68575674041142	0.681818	0.837927370469771	0.702128	1.06361966779743	0.573034	1.03440816858287	0.641791	1.61766754393067	0.535714	0.823652912802766	0.692308	1.16156818497823	0.727273	0.897781924315172	0.528302	1.22050259439148	0.534483	0.650236678104151	0.746032	1.5676569614424
Platr5	chr1	+	0.935598	27.7206647556611	0.966752	12.531512179255	0.943934	84.2961380287747	0.910408	14.3713460589553	0.947013	31.7338436413944	0.939614	13.3148201190783	0.939075	33.0981459048943	0.926267	14.9863458035602	0.907458	26.2325255303484	0.919118	13.5826964721995	0.931013	25.0997610023953	0.922053	11.6720807727763
Plcd4	chr1	+	NA	0.146640239814382	NA	0.141257401810675	0.37037	0.153859878841689	NA	0.1593030532747	NA	0.152775897350929	NA	0.110772888260502	NA	0.14664510666433	NA	0.160365918780753	NA	0.172282125335953	NA	0.138294607199845	NA	0.168789258351024	NA	0.146966958671955
Plekha6	chr1	+	0.333333	1.2013875059379	0.310127	0.678036020308741	0.389474	0.732506557044159	0.277228	0.940986539440073	0.278788	1.04782941736386	0.367347	0.579298374508061	0.297229	1.05537068170859	0.19305	0.864785658825502	0.272727	1.26389428474978	0.263158	0.97024072297292	0.34898	1.41043764526425	0.25625	0.880452297628623
Plekhb2	chr1	+	0.404908	3.09840660369949	0.403226	3.13118356866368	0.363636	1.766535960664	0.25641	3.74827224304074	0.385135	2.83718653398343	0.465608	3.01990561356708	0.383562	2.61192565227311	0.338983	3.29406570618001	0.415205	2.69957598040581	0.37619	3.28105446222334	0.453552	3.06226712514694	0.477011	3.99181569141503
Plekhm3	chr1	-	0.566698	2.70314601446548	0.532703	2.77332015713382	0.617225	1.0934380574072	0.588467	2.67053979245376	0.550952	2.35463705680889	0.562041	2.96683858325436	0.5476	2.19401103507517	0.552722	2.91599803081501	0.541826	2.96583345783143	0.561809	2.82390656271247	0.565382	3.0235320821487	0.490204	3.40976625062506
Plxna2	chr1	+	0.550725	0.551409368057117	0.595556	0.754972884343902	NA	0.17987871854857	0.414729	0.898749938315964	0.545455	0.409053198795486	0.545455	0.805306484921268	0.5	0.371805994434678	0.51004	0.80667878606615	0.597222	0.514106971527816	0.5	0.756403484121666	0.583333	0.4985248829974	0.59596	0.716177172619059
Pm20d1	chr1	+	0.410931	1.02673743479752	0.440678	1.05275844246809	0.49635	0.485830957069585	0.405455	1.10537548415004	0.391408	0.823674157311376	0.413725	1.11040836339676	0.42437	0.843035146145706	0.442155	1.22775735551038	0.454867	0.878732423782098	0.411932	1.16768380429555	0.418803	0.943944181610359	0.447674	1.25986100677729
Pms1	chr1	-	0.505682	4.7277817054063	0.464765	3.84946493002902	0.468809	1.90669695431362	0.495575	4.15688733946846	0.474308	4.04597389925362	0.515464	3.87449710152031	0.501639	4.02032568688869	0.497591	4.34789226782643	0.449647	3.98694055374901	0.479901	4.21826691581886	0.524522	4.32669916885273	0.489756	4.41196532805959
Pnkd	chr1	+	0.536735	5.30418256707644	0.528909	4.31278027501635	0.530809	10.5483287299301	0.499421	4.61523026676147	0.533867	5.35954311499673	0.525298	4.22001702407434	0.565054	6.01221002392275	0.52926	4.33656129378514	0.512685	5.38749771404005	0.5285	4.63462469134318	0.510015	5.53614430149911	0.500852	4.48108875188694
Pou2f1	chr1	-	0.454351	9.21320510812511	0.455525	9.51454407696755	0.451681	2.18133946322142	0.473134	12.174243986411	0.465093	6.8459979007057	0.459903	10.5482081805185	0.456376	5.38024755980271	0.464315	10.3255518993864	0.449666	8.57692386865379	0.467956	9.66785133566656	0.471429	7.629996752022	0.477013	10.4331355804706
Ppfia4	chr1	-	0.422773	2.86760385969114	0.431315	2.11774116785471	0.37338	2.487746693112	0.449657	2.86092536086414	0.435115	2.861574724282	0.425727	2.17480064927383	0.424028	2.71973985836681	0.46084	2.53563968239553	0.433387	2.89153469572024	0.452459	2.62474890788688	0.478099	3.29496454238641	0.494557	2.64837678197952
Ppil3	chr1	-	0.547667	6.32529525779709	0.542079	5.17949293215768	0.578947	9.11916493975134	0.538793	5.26486883146059	0.552413	7.1892945117433	0.549751	5.51665849447423	0.563014	7.22869671998807	0.588933	5.69693993564964	0.486239	6.45018605923686	0.535948	6.06930810343136	0.546926	6.07912953053	0.511765	5.32089563680349
Ppip5k2	chr1	-	0.571817	10.9104382536206	0.55482	8.9377707734131	0.490331	1.26375831944734	0.565629	9.41139421498055	0.578688	9.75275246440217	0.574493	9.85324380340099	0.578202	8.30993954431041	0.578598	9.63838577551031	0.582865	10.3528207788281	0.554945	9.60025400043624	0.579072	9.40106546373037	0.563124	10.09937653992
Ppox	chr1	-	0.549887	3.94871867355197	0.608065	4.73086357589016	0.604096	5.56976169156167	0.571882	5.16184644691459	0.576483	3.97200185777253	0.608865	4.82045390541664	0.659361	4.21521966455153	0.626947	4.7261749822578	0.641156	3.85310340632315	0.570783	4.73628301451465	0.591635	4.2915620754874	0.603563	4.6259487604437
Ppp1r12b	chr1	-	0.561688	0.625775083686662	0.563218	1.0713700594748	0.460674	0.232709258674121	0.568266	1.08659766048945	0.680672	0.515465807663642	0.575309	1.06292722810587	0.543651	0.489313272575723	0.631387	1.0217239882087	0.63289	0.637731416593975	0.588933	1.01874165972495	0.573055	0.623221238464571	0.59276	1.17476458688825
Ppp1r15b	chr1	+	0.487577	42.4112441339614	0.480029	39.9212214947928	0.514848	20.8592147692587	0.505448	43.0663920540643	0.491973	40.8493817181311	0.487352	37.8887201818913	0.494025	40.4633023543879	0.482458	38.7490189343311	0.478268	41.8261955521981	0.494479	37.9235652282343	0.499904	38.0076357034026	0.508909	38.6068020664499
Ppp1r7	chr1	+	0.487258	10.131398451097	0.492727	9.37090139633306	0.48089	9.86685786214441	0.468425	9.16452705135208	0.476484	9.97131592424232	0.485189	9.77404353810564	0.49248	9.73950710230241	0.489948	9.23764324496	0.473669	9.74959448491477	0.464059	8.79059962624623	0.493667	9.43997128761232	0.493627	9.19360766190207
Ppp2r5a	chr1	-	0.433393	8.30293910446117	0.41517	7.22105089976263	0.400254	7.43163340815669	0.431298	7.82390759879035	0.468315	8.25111865610836	0.472371	7.51545633967712	0.385557	8.29595126245881	0.430508	7.82477327735606	0.410053	8.23177692134559	0.377451	7.68146994796391	0.416667	8.24351136156194	0.346734	7.1836765529815
Prdm14	chr1	-	0.204557	42.0072025729013	0.200484	50.7884258929819	0.187988	34.9899907398565	0.12158	30.2929851135434	0.202423	44.4055156050634	0.199908	50.7164311417459	0.21466	44.7204730967206	0.179289	50.0832216497172	0.200532	44.9425599433044	0.18819	52.9106909245297	0.189353	41.861839180501	0.195039	52.0364647171008
Prdx6	chr1	-	0.505576	92.0689683836212	0.511811	86.3073452111146	0.496408	153.344218183706	0.441905	86.7169487412373	0.485765	97.5983036693716	0.481625	88.2026603422935	0.478093	106.402022936971	0.508251	84.9890945139378	0.463934	96.1628087016137	0.517557	85.5820136176574	0.477449	99.2557729604946	0.423888	81.1674678982416
Prex2	chr1	+	0.562633	0.50419730620528	0.469333	0.452415378242618	1	0.105507512096504	0.495401	0.517753327361204	0.620939	0.379182715355032	0.416237	0.545562829186335	0.683333	0.316256490102976	0.47549	0.493159718172402	0.519637	0.434876813070882	0.504052	0.457247915244847	0.546142	0.476294745367879	0.442125	0.615862623569864
Prim2	chr1	-	0.610966	7.59439687433625	0.622314	6.42191241470902	0.656314	7.7915617765018	0.599784	6.87032176404317	0.598307	7.55647232493206	0.618056	6.49331316853692	0.611068	7.95293831814712	0.605185	6.71150477353688	0.611047	7.71910825451955	0.600044	6.72923486973425	0.59843	7.77415000426509	0.618321	6.28316990462887
Prrc2c	chr1	-	0.45914	42.8602068489708	0.477301	49.4608998513997	0.360947	7.58351347222237	0.472739	48.852988406471	0.472364	34.4563899770838	0.469142	52.8281310132331	0.454825	27.7586033788162	0.473859	52.4405591937458	0.46331	41.2482097282708	0.479483	50.0277851538345	0.460724	37.5488346303034	0.474464	52.8198732354743
Psen2	chr1	-	0.712042	0.867187517411499	0.578824	1.43493405519733	0.844444	0.804866764246158	0.601108	1.42656570965629	0.692308	0.762151888778871	0.622356	1.18429698119639	0.765487	0.784412814612762	0.650704	1.22575164351544	0.676923	0.911949274512689	0.608696	1.19948969864317	0.737991	0.716581232979967	0.6	1.29393932199427
Psmd1	chr1	+	0.510777	54.7921123032371	0.505619	49.3087649416852	0.521433	23.5538119786116	0.504506	48.8695352408205	0.503584	53.9624583425761	0.49325	50.0689304236603	0.514924	51.8497706941394	0.515315	50.0546814669957	0.51711	55.5753347086953	0.51088	48.9008213080894	0.517088	51.5258194543865	0.502962	44.5585144817755
Ptgs2	chr1	+	NA	0.116199340488087	0.731707	0.645552405322518	NA	0.0157779162509417	0.681818	0.534635971569793	NA	0.0825680429534096	0.719298	0.508020356805085	NA	0.0896848203894797	1	0.370014595352752	NA	0.096129634816115	0.833333	0.398179610703015	NA	0.106586285171767	0.818182	0.537881143240708
Ptma	chr1	+	0.17945	1580.86196530778	0.167883	1399.29660229226	0.135986	1157.26839193415	0.173533	1316.07430527829	0.177887	1603.59555466598	0.182912	1358.95961274375	0.161869	1773.61898681816	0.181745	1368.0203915826	0.189747	1528.96108758062	0.186442	1392.65174945513	0.176247	1666.98590895874	0.172189	1353.72843522251
Ptp4a1	chr1	-	0.60804	38.2368903271993	0.662745	42.6896516629306	0.816327	14.8807816879207	0.757732	43.8975635190202	0.683486	35.7799591817378	0.706827	43.1396171845666	0.697368	35.9894372283298	0.68	41.3840212090536	0.707865	32.3715196152693	0.646617	40.0885951290571	0.645833	32.0300235330621	0.742424	44.5216772373965
Ptpn14	chr1	+	0.553957	2.87661157154024	0.547907	3.61397969754263	0.472851	1.58527887156679	0.56871	3.79022440527949	0.523888	2.52007995616381	0.557118	3.46829291911782	0.5128	2.31255778912017	0.518987	3.77140128043397	0.521262	3.06775103126877	0.524141	3.81253249203088	0.521114	3.0245119413561	0.530777	3.75714247617648
Ptpn18	chr1	+	0.0337838	0.429172331283334	0.126214	0.377670906619864	0.103867	1.3663378969036	0.0558376	0.370441645867526	0.0443864	0.515292054404958	0.0917431	0.347269630017735	0.0733591	0.559854045987017	0.0341463	0.330649723635207	0.0643275	0.379413588382233	0.112	0.373262928136888	0.0625	0.445385081386265	0.207865	0.398714657980562
Ptpn4	chr1	-	0.533849	4.13129328253347	0.549414	4.19007892686563	NA	0.532987237156403	0.551821	5.0055964953364	0.558025	3.21701921671586	0.574468	4.56236970644555	0.574932	2.42984160575341	0.544629	4.65792627685722	0.564428	3.41496272297217	0.530749	4.40892112101716	0.538033	3.37665305073792	0.542714	5.30764701159373
Ptpn7	chr1	+	0.52356	0.997855423488852	0.438356	0.430172165048355	0.441176	1.02141451442613	0.47619	0.635365757757066	0.625	1.05593125248904	0.545455	0.423937217322031	0.562044	0.9852476514227	0.578431	0.624877155868586	0.547085	0.89507933111489	0.453333	0.556786043459126	0.590361	0.92103542576593	0.381818	0.465154933914217
Ptprn	chr1	-	NA	0.158406117119072	NA	0.088253052856977	0.5	0.255105400432972	NA	0.106338207370193	NA	0.150615638213255	NA	0.112240069241751	0.8	0.207989829294957	NA	0.0864151133886517	NA	0.187632954906229	NA	0.0911310979337831	NA	0.24450827310918	NA	0.0840264422333794
Ptprv	chr1	-	0.316285	1.60403006118831	0.315878	1.25916375009342	0.325175	0.848082757578885	0.382799	1.63545911440557	0.310236	1.49464420280361	0.251641	1.16449698582744	0.301824	1.32898036669107	0.355322	1.51388944729496	0.316934	1.61450219763345	0.318653	1.53208097110483	0.34278	1.54067098984031	0.369955	1.46142992660933
Pvrl4	chr1	+	0.521739	0.325924534373639	0.8	0.273359200920366	0.533333	0.356877427640761	NA	0.291815168297333	0.525	0.380506801092533	NA	0.289343817774233	0.4	0.355538376935951	0.869565	0.414694236382623	0.588235	0.365301212519644	0.795918	0.346782526329564	0.375	0.461119523594148	NA	0.262100365960085
Pycr2	chr1	+	0.513162	30.1518871735982	0.543004	24.3399413607656	0.552368	59.1136061003483	0.570197	23.267096180871	0.54074	35.0685077382616	0.542637	24.7849136291742	0.502793	37.9221973711041	0.524548	26.0339709126104	0.514603	33.7870642775261	0.536309	26.8481270180054	0.521761	33.0191306239009	0.515834	22.932855672559
Qsox1	chr1	-	0.484756	2.02762478063974	0.444126	2.17269439413001	0.465839	2.30969207016861	0.410926	2.51914779253506	0.473438	2.02267689313615	0.403361	2.31304842393645	0.504158	2.13933319543989	0.45292	2.35739447981184	0.473939	1.95475007676032	0.46748	2.48581422509858	0.49589	1.84789248697262	0.391304	2.01100278463607
R3hdm1	chr1	+	0.558603	3.18016082726636	0.504488	3.83994581057156	0.5338	1.55835862019639	0.516791	4.10647761881018	0.542857	2.92316345385009	0.499072	3.85735198093403	0.526523	2.6577620813208	0.513158	3.84205578377847	0.481092	3.09141179057261	0.512739	3.84531889075575	0.529536	3.06347055670167	0.523622	4.22841494163141
Rab17	chr1	-	NA	0.345743135706934	0.565217	0.499577507909742	0.933333	0.825291156509474	0.850746	0.702419033215621	NA	0.306664904667089	NA	0.457058649980478	0.88	0.437400410990434	NA	0.4749944725985	1	0.388280042938747	0.853333	0.576886177469544	NA	0.471274700809673	0.632653	0.806539954178379
Rab23	chr1	+	0.487042	5.26544014230737	0.514571	4.61836079511815	0.45711	2.96334405212542	0.501701	5.10175803545564	0.506258	5.00856575637638	0.546956	4.7550386999929	0.504961	4.92928806092172	0.536752	4.93127256844523	0.483061	5.2164418865966	0.528446	4.78526561984513	0.531832	5.2122925026665	0.57333	4.73595847919786
Rab29	chr1	+	0.609672	4.55294122092747	0.577236	3.71371750578373	0.577801	8.20833195476019	0.626866	4.07072883179966	0.624815	5.05298770516071	0.599265	4.07563236814044	0.609234	5.39264139245536	0.562712	4.25205918624147	0.551389	4.41765191590884	0.581979	4.38200444069464	0.596104	4.81753179171	0.561828	3.22249705579536
Rab3gap1	chr1	+	0.425743	4.12490567677839	0.459441	4.66229336648499	0.474286	1.65425083095778	0.455662	4.5113698621408	0.468156	3.57348770509514	0.403075	4.69762338820629	0.466195	3.40124812017508	0.420395	4.67848374221282	0.44125	4.0446212490473	0.474886	4.61984125941582	0.46729	3.66923430139865	0.473148	5.26036398310449
Rab3gap2	chr1	+	0.435315	4.93206075440848	0.442347	3.97288812047063	0.420415	1.97384654135624	0.463918	4.30508072741898	0.398199	4.37821752492247	0.441925	4.25657834016917	0.432385	4.10986980457545	0.408673	4.50472784485745	0.42974	4.68920166181288	0.410577	4.26307737591008	0.427416	4.64290060651302	0.396914	3.90747697504316
Rabgap1l	chr1	-	0.510949	0.797728902897066	0.581395	0.979012450410439	0.666667	0.184296411993664	0.484848	1.07845902636563	0.5	0.637331376794102	0.555	0.938070458909822	0.482759	0.527740121023066	0.497041	0.935524376253772	0.443548	0.6182181020605	0.540816	0.900037271716374	0.606557	0.640076730008774	0.579268	1.03733702784306
Rabif	chr1	+	0.524786	22.5244001103655	0.512239	18.9646160247752	0.519745	19.3222947110886	0.501964	20.8158848380531	0.535244	23.1565920373422	0.531275	18.9676182681601	0.517079	24.3679051595306	0.514397	20.5095559481048	0.513873	23.9025582786213	0.508339	19.9477970083348	0.509006	23.2884618569754	0.478632	19.2802798134106
Ralb	chr1	-	0.450426	15.3415849936286	0.434558	16.8273248446062	0.475052	19.1870342933004	0.430411	16.9758152821552	0.472411	15.0314677728359	0.432862	15.6624238344977	0.464165	16.2722078599711	0.441221	16.4625597837637	0.456688	13.859172978799	0.45525	16.8562996902287	0.437197	15.0077724811902	0.496022	15.3855321714795
Ralgps2	chr1	-	0.703493	3.14349913867411	0.671682	3.35950169878064	0.618205	2.36491185087243	0.67275	3.29977106774656	0.714063	2.74766244437435	0.676757	3.32085522131412	0.731766	2.87052143897067	0.65971	3.24396301646843	0.665207	2.60533894565154	0.700643	3.22064186591196	0.675638	2.76752782581424	0.692705	3.59982662963155
Raph1	chr1	-	0.539585	3.04379941806324	0.552261	4.20758420165567	0.469027	1.15896253542476	0.52249	3.98403830834583	0.522293	2.65448539631309	0.564646	4.2146851696642	0.517214	2.32147114580038	0.533708	4.18816460190594	0.542007	2.88397269873446	0.54371	4.26009666014375	0.527979	2.78821728657934	0.611226	5.26885924468303
Rasal2	chr1	-	0.520492	2.48347610062774	0.552595	3.04511793144817	0.447368	0.562745679616921	0.5547	2.73788778297944	0.577181	2.06314250918199	0.56044	3.41520103218656	0.479167	1.66233985267369	0.554333	3.08859405287506	0.537202	2.34954684014523	0.495868	3.03816497481616	0.571942	2.23102403748424	0.600326	3.37409982849304
Rassf5	chr1	-	NA	0.224251213313432	1	0.289278218109441	NA	0.103528447606466	0.916667	0.296135765892025	NA	0.170489847643594	NA	0.244689853919764	0.8	0.233445155159052	NA	0.257503428128185	NA	0.185974836123346	NA	0.224503242807892	NA	0.185848448827762	NA	0.204600775386607
Rb1cc1	chr1	+	0.474074	4.1406757659995	0.461823	4.44262757944065	0.472477	1.093289301662	0.465675	4.80217450686486	0.451799	3.58319883571667	0.41358	4.74281355970407	0.426323	3.03934543056656	0.402581	4.51449711378289	0.433465	3.45638326322827	0.444812	4.41473386404266	0.490046	3.28647278409588	0.434358	5.05162308926926
Rbbp5	chr1	+	0.498508	30.1822960497062	0.53913	28.0011010053467	0.462771	14.245711964023	0.50558	32.1803985973659	0.503051	28.7044593310984	0.513054	31.0657663809923	0.521955	27.4819489109367	0.503805	31.4497969517705	0.514841	30.3447032293662	0.497454	31.376481151695	0.504364	29.9326444760405	0.478379	28.02627147985
Rbm44	chr1	+	0.130366	1.08546119661759	0.13	1.99145856108744	0.282051	0.371403143660937	0.160066	1.84705600181024	0.144828	0.981843888874071	0.125688	1.72498752254354	0.125637	0.88799204991062	0.146739	1.5448213430861	0.186536	0.845254869313935	0.149691	1.72089201881806	0.123179	0.88529653891773	0.118677	2.8510779036872
Rbm6-ps1	chr1	-	1	0.0709008888364489	NA	0.0603034931529287	NA	0.0566520651449318	NA	0.060941581627418	1	0.0760174825904481	NA	0.0704963864313676	NA	0.039032924680122	NA	0.0442857189908259	NA	0.0497531286325801	NA	0.0522265080526889	NA	0.0523361228717975	NA	0.0684200676575944
Rbm8a2	chr1	-	0	0.233972117926421	0	0.161688177642849	0	0.310546655058707	0	0.163399046403858	0	0.228279704819447	0	0.194418285449736	0	0.279084439043224	0	0.179430346251652	0	0.284586904186357	0	0.140031836800464	0.0232558	0.308716629122318	0	0.253495467411919
Rc3h1	chr1	+	0.553873	9.00018402455631	0.509721	9.39228150180801	0.501199	2.37244300047599	0.502228	11.0938011002743	0.523691	7.44726632148481	0.502049	9.75250924972074	0.516226	6.31714587609128	0.528084	9.82611038642139	0.546716	7.59542578033836	0.541971	9.5548076263267	0.523128	7.32559930687084	0.521739	10.1965251695594
Rcor3	chr1	-	0.875	1.03876612531984	1	1.38910821500614	NA	0.278505356228082	1	1.55360321918613	NA	0.904371057868617	0.652174	1.30386228743583	NA	0.839740532729425	0.8125	1.37158287953601	0.0454545	1.02028855085517	0.69697	1.42404010244898	0.909091	1.05120482493097	0.823529	1.69052479604324
Rcsd1	chr1	-	0.15816	4.44815153197415	0.216016	4.26370974336173	0.186295	4.47586046879814	0.214558	4.67280951165729	0.179622	4.21079277054875	0.202757	4.45207191005045	0.179977	4.28788957406317	0.207617	4.92486589794215	0.190655	3.52832562961222	0.201205	4.76528437386778	0.155205	3.44092400641705	0.227533	3.73380258667537
Rdh10	chr1	+	0.489247	2.18235243263966	0.469474	2.38180677914059	0.524324	1.16819160934406	0.521079	2.88000246154861	0.536082	2.16072384890023	0.487859	2.43178640694742	0.492135	1.95384600620362	0.531729	2.29825612024532	0.519313	1.81635795826213	0.513369	2.22192824123198	0.588808	1.7331308381776	0.541796	2.28292168055772
Ren1	chr1	+	0.578571	2.00264318293714	0.448529	1.77562307237863	0.559701	2.1587274551907	0.571429	2.07588775235781	0.514706	2.18565172333985	0.525	1.77921477402522	0.5671	2.23853679084833	0.435714	1.8579630486019	0.535135	1.96765566757636	0.504808	1.92224753160131	0.504202	2.39463293238446	0.504762	1.84224044572983
Rev1	chr1	-	NA	13.4728223841398	NA	16.4522229565891	NA	7.36043118542735	NA	19.0531447462653	1	11.8635338369974	NA	15.8130549554453	NA	11.4906230703113	NA	15.4089762732328	NA	11.8684227719372	0.916667	15.1558763589541	NA	10.8773379453285	NA	16.1264752204323
Rftn2	chr1	-	0.730769	0.285273822475336	0.904762	0.194069877399698	0.632653	0.252323038119727	0.5	0.196123386169086	0.538462	0.198190132320069	0.62963	0.231385686685821	0.575758	0.284094743910394	NA	0.187622798563301	0.636364	0.210786263473748	0.735294	0.202117149556657	0.511628	0.255841718007254	NA	0.228045703276462
Rfwd2	chr1	+	0.652803	3.14198533726307	0.621315	3.13631125615619	0.595881	2.01016652176198	0.589512	3.08628671098323	0.623917	3.13878077807237	0.65851	3.16493196859436	0.651645	3.00875204184413	0.585379	3.22015080772918	0.618506	2.97753983608433	0.599716	3.14980815167678	0.602162	2.80983468842095	0.625409	3.2296838627948
Rfx8	chr1	-	NA	0.0804955968125541	0.6	0.262964391016336	NA	0.143579775514063	NA	0.252118846541044	NA	0.14279487847051	0.9	0.209445785774353	NA	0.0872872789714431	NA	0.224476674413007	NA	0.0890082463303755	NA	0.297818060763288	NA	0.11703652223941	NA	0.450666925308087
Rgl1	chr1	-	0.6	0.473638562336617	0.545455	0.281895039116141	0.378378	0.316483481538543	NA	0.398828991387485	0.464286	0.442215498839468	NA	0.30966560942923	0.515924	0.493777831024151	0.363636	0.329184598138618	0.27027	0.466875281798198	0.636364	0.338176784503615	0.44186	0.512860411631952	NA	0.196425038596871
Rgs16	chr1	+	0.636364	0.414907888300645	NA	0.295974391361959	0.3	0.247158123742841	0.818182	0.162015847977694	0.913043	0.503684884645902	1	0.407787989917231	0.62963	0.388475039177823	NA	0.277735053972203	NA	0.234017672868506	NA	0.234970907684678	NA	0.240815529032801	NA	0.198433885833483
Rhbdd1	chr1	+	0.462857	1.63582986703906	0.463092	2.31680636143919	0.576923	0.609452026302346	0.500376	2.2680894794888	0.454754	1.43233553520649	0.496499	2.25925434810087	0.471042	1.44019749941863	0.474527	2.19557397238133	0.492007	1.51516941846915	0.50429	2.19835912245612	0.451318	1.30273695647302	0.463287	2.46014369026446
Rims1	chr1	-	0.751807	1.64928532177981	0.769333	2.33246614906423	0.642857	0.548605725010675	0.727599	2.86151426066689	0.793651	1.48939149623423	0.742779	2.60254138467496	0.810021	1.36074950134855	0.740077	2.70476488246982	0.771127	1.64035409222331	0.735658	2.64989285926375	0.737819	1.42319634506659	0.724512	2.1078792595303
Rnf149	chr1	-	0.488802	14.7868152579116	0.51398	16.8415955486925	0.449673	5.21983282875588	0.472695	16.305935141662	0.496616	15.4517988660859	0.499127	15.7451865762462	0.501774	15.2585237663986	0.516556	15.9434830187832	0.518392	15.5973779226239	0.535221	16.5136120822553	0.518303	14.4885585397335	0.483707	16.5430685081135
Rnf152	chr1	-	NA	0.205474248148041	1	0.277227380813608	NA	0.0614047947858087	0.7	0.259661231922418	NA	0.172176806364223	NA	0.264237510322918	NA	0.135675859852729	0.78125	0.319454896679278	NA	0.158991918913185	0.735294	0.336719780098257	NA	0.258204625576285	0.909091	0.374519896834761
Rnf2	chr1	-	0.632432	39.1071837608774	0.623762	45.3890331401257	0.666667	12.9966331923086	0.65344	40.285739925304	0.647212	37.5652353718384	0.636241	44.3707877530243	0.656436	35.9872993673863	0.639128	42.4214217323587	0.642166	35.5767721013358	0.616438	41.4222520198311	0.662318	35.6040031529184	0.651852	47.9613566587629
Rnf25	chr1	-	0.535948	7.82995577533325	0.526096	7.04927835174741	0.531183	15.0506201435192	0.502627	8.30004223499146	0.550085	8.30933938844855	0.546185	7.40810032379878	0.513032	9.29114452893243	0.529528	6.98664804984769	0.51076	8.27658084629531	0.529215	7.26771011474609	0.526603	8.51113898548729	0.574866	7.35010227048526
Rnpep	chr1	-	0.610811	6.81568123635162	0.628732	6.92292370041427	0.626946	13.5473435874361	0.623746	7.6542230553701	0.628219	7.8987797353786	0.618512	6.82300342059762	0.632778	8.37422919827327	0.621795	7.87176839003987	0.614739	7.10341730884785	0.591882	7.76089876991217	0.642718	7.27306080563407	0.634076	5.83618799846785
Rnpepl1	chr1	+	0.54	2.31310614030837	0.501695	3.36836763711163	0.569892	3.20591525301695	0.513631	3.26544718137682	0.538088	2.45355987134421	0.501996	3.23473938775261	0.503566	2.49416645891822	0.489531	3.30567738136138	0.603325	2.51007520785785	0.523923	3.38824091220032	0.456053	2.19481494125046	0.519747	2.88503950652758
Rpe	chr1	+	0.617096	61.7209503086676	0.647196	50.2728797532116	0.608147	25.6448411950799	0.611429	55.1591299643429	0.635108	61.6174808514	0.618131	51.377327102592	0.59581	59.9287259004628	0.640379	53.771512298212	0.589337	57.4055689650319	0.595324	52.1020094301894	0.61719	57.1047960397933	0.630703	51.254728871789
Rpl10a-ps1	chr1	-	0.99711	66.3206847461592	0.997175	66.7099709072934	0.998967	162.922907958749	0.991573	66.3461090735019	1	76.6597954479326	0.994805	68.6569050331241	1	81.0588377897172	0.994681	70.6543058416597	0.997674	70.2312830807147	0.997625	65.7774501803048	0.993631	72.0400596106918	0.996	69.7952216168121
Rpl37a	chr1	+	0.199609	649.2936606982	0.19561	610.045728905346	0.205947	2301.76995770219	0.202325	593.040722852472	0.200397	757.468915924875	0.20195	634.961797578261	0.202971	832.020579474474	0.19273	605.683797227251	0.195498	689.09929019914	0.195488	613.655284116571	0.19965	718.016057863723	0.195017	549.695280213312
Rpl7	chr1	-	0.698702	443.187347385764	0.693424	420.353686861871	0.672855	612.271053553389	0.697261	403.592409474519	0.692063	479.784930762079	0.699142	423.570467245353	0.692978	493.708245611445	0.692609	418.999597921664	0.678461	442.262108990799	0.695686	424.177206534312	0.689469	443.141982976485	0.685237	421.564516457223
Rps6kc1	chr1	-	0.501745	2.37177254916063	0.438316	2.21202573205407	0.496274	1.63205301452098	0.456072	2.32670445852515	0.464079	2.38603798176278	0.432665	2.14677092588736	0.455964	2.26556054664759	0.44597	2.33558181061051	0.450419	2.38327837552108	0.43038	2.28120358073996	0.489435	2.13050805222371	0.455764	2.21928619003747
Rqcd1	chr1	+	0.463284	54.49000871053	0.473632	46.6151833826573	0.473572	39.7814012948878	0.457779	48.7884269698493	0.466454	55.3389656382379	0.465472	49.0778116897715	0.474604	55.73571552329	0.466756	49.5717366949612	0.472548	55.3879912144225	0.453779	47.7792579969869	0.454939	50.7585270962176	0.4689	44.8618350048639
Rrp15	chr1	-	0.501315	30.1891428230679	0.519896	26.2625529357786	0.529235	32.2773348376377	0.501612	26.3244490257676	0.496681	31.0023029420353	0.504739	26.9537133184742	0.501388	31.7308581376423	0.502932	26.2039408993537	0.499611	29.3018636900233	0.481216	26.6360700194035	0.493712	28.6551314099225	0.499732	24.2777075514606
Rrs1	chr1	+	0.652034	54.4024245694715	0.644683	59.2537275099972	0.696279	46.4257096420257	0.674147	58.5712179442454	0.664032	57.4614220769804	0.660609	55.6195147264004	0.678906	57.9328057295002	0.626001	54.5719133500459	0.663082	53.9302779014907	0.631336	53.3605262611914	0.630053	54.4137451388448	0.620821	50.2245451726553
Satb2	chr1	-	0.421053	1.87473089310293	0.507246	3.50578461777762	0.464286	0.561559469158259	0.467866	3.41404831369569	0.54902	1.69487928159848	0.497696	3.23610400884121	0.490421	1.67967060089809	0.463087	3.30170433821654	0.513011	2.04223228785434	0.51782	3.07118616636738	0.53169	2.00995743935185	0.564815	3.57133547025189
Sccpdh	chr1	+	0.928571	4.76909557314143	0.877375	5.12858136254966	0.905963	4.80908258371486	0.863905	4.64509650932692	0.916828	4.89310522161674	0.842593	4.63442424023984	0.8928	5.17836341936752	0.845638	4.93586846058069	0.887218	4.5601880747004	0.847973	5.06273791557437	0.888298	4.61651273911997	0.846827	5.24069653378853
Scly	chr1	+	0.365734	3.35145385521133	0.344918	4.09628058823891	0.333583	3.91178905159779	0.343113	4.37351969488699	0.35266	3.14937528261255	0.344092	3.6534453948549	0.376339	3.14667858398042	0.386094	3.83091318393613	0.343441	2.85384157288187	0.351095	4.14347709880975	0.332598	3.06253756595976	0.363698	3.97134197940454
Scyl3	chr1	+	0.507909	3.85248278805384	0.627941	3.59446028172063	0.569231	1.47278227727788	0.517147	4.27559148337806	0.504615	3.549683647581	0.504854	3.7262722838283	0.576523	3.33597778368919	0.482759	4.0672588487616	0.539084	3.55009839211765	0.547929	3.85790847947979	0.558946	3.56828864400157	0.48073	3.725968076035
Sdccag8	chr1	+	0.722222	0.568638944875668	0.631579	0.530935574655559	0.717949	0.43315710744139	0.444444	0.473014318686373	0.76087	0.531907587474328	0.680412	0.591510609812238	0.775	0.482331449990905	0.672	0.666949291817112	0.640625	0.541793777448028	0.716418	0.544526803504058	0.76	0.521417689804515	0.727273	0.613926206503358
Sde2	chr1	+	0.544925	27.3009668132775	0.51945	23.8215737137538	0.527323	15.2447354135305	0.53527	26.3831604157722	0.557211	26.2189721538731	0.519713	24.802399788012	0.523297	27.1929875068881	0.531623	24.904100088222	0.524993	28.2586709604265	0.530447	23.7113637922503	0.53283	30.2919247621554	0.524164	23.1435838191203
Sdhaf4	chr1	-	0.278095	7.10999504764667	0.289827	7.4753217470494	0.247619	12.6708040592588	0.346228	6.77062831272883	0.297345	7.52196179371723	0.350844	7.29202038367024	0.284439	8.38830750915568	0.360887	7.22269336843893	0.253054	6.15386618872313	0.312914	6.94570728089736	0.263063	7.06053619494041	0.28125	8.1904101586328
Sema4c	chr1	-	0.435835	2.68887604394513	0.482759	3.5357786222307	0.757895	1.30192714337593	0.545977	2.3006784957408	0.422222	2.51119745703501	0.518784	3.14018195079327	0.464052	2.42547649755897	0.478846	3.11162429943427	0.454545	2.29539971241558	0.462462	3.34503222434134	0.447581	2.61351115944072	0.548463	3.35418537646233
Sept2	chr1	+	0.518426	47.7389771479596	0.514332	42.0548781777962	0.51711	20.7623259010152	0.496542	42.7976240419955	0.510689	45.3912815184545	0.51789	42.4170634335657	0.506929	42.9559045571929	0.493712	44.2109319924271	0.51703	44.5190629187782	0.515533	44.1038264050144	0.519178	44.4552368021334	0.52044	47.5605259376427
Serpine2	chr1	-	0.344292	1.99271571101579	0.32321	3.02131149195225	0.299448	2.11024632024783	0.311011	2.44121763915085	0.347826	1.97802008981118	0.316998	2.64376336130571	0.316667	2.00368280669618	0.29604	2.55962109706653	0.28594	1.81353966251018	0.311707	2.82012324671259	0.286555	1.7324801850332	0.322917	3.34108227090609
Sertad4	chr1	-	0.54386	0.532599543972821	0.507853	0.996469539887637	0.846154	0.356621888871935	0.578571	0.840439812079937	0.604651	0.479785493149653	0.634518	0.803292590323142	0.514286	0.442925127127768	0.697531	0.865673973646932	0.645161	0.485243771224118	0.582938	0.869492228004463	0.560976	0.445412124501343	0.590361	0.908799444126329
Sf3b1	chr1	-	0.508078	54.6524111195805	0.494834	48.3112215731341	0.41711	22.3589031590434	0.500645	48.5006596768289	0.491262	52.2137322450114	0.50479	50.2456019053448	0.491949	48.1148102062742	0.489557	53.5104346893885	0.498951	53.1072530838537	0.504353	52.0012228627563	0.516525	53.004283008628	0.49712	50.0499113391208
Sft2d2	chr1	-	0.504202	1.2215831176304	0.480836	1.18628421151404	0.452055	0.706533540149808	0.486567	1.29597050757395	0.455882	1.10704847381048	0.501244	1.12532113170521	0.415307	0.99978990169206	0.41256	1.24083375746013	0.44281	1.10603712093735	0.477819	1.16321219860073	0.404355	1.28199942743719	0.477459	1.43074322469029
Sgk3	chr1	+	0.318408	0.299689001807145	0.390411	0.373892753851605	0.5	0.102251613632422	0.365297	0.34729519071172	0.433735	0.214445330781905	0.48538	0.310019570963463	0.409091	0.256579831213171	0.352657	0.310844837721226	0.397849	0.234476959026229	0.46595	0.305484867927503	0.466912	0.31574713404481	0.408	0.570057848311371
Sgol2a	chr1	+	0.582152	16.4345895688619	0.603563	17.7796907492965	0.598945	6.2651184930509	0.602596	18.6708933601364	0.59004	14.8394327702988	0.602374	17.9002166771453	0.586823	14.658771753663	0.606643	17.8507971330575	0.606306	15.5402315058161	0.616504	18.5250189302575	0.588852	16.7185853581779	0.589625	24.4192718993913
Sh3bp4	chr1	+	0.649697	15.043404837328	0.663936	14.9501721981587	0.681463	13.3761204804846	0.686403	13.5202610332161	0.652056	15.4551433331752	0.661504	14.9945482970569	0.672353	15.6393089002481	0.650851	14.6968368944428	0.658351	16.2358269309003	0.658605	15.2348173745344	0.657846	16.7653135364531	0.668321	14.2825309465276
Shisa4	chr1	-	0.574713	1.11342860486176	0.575758	0.542785473764488	0.571429	1.89025048352111	0.5	0.663056841734762	0.528455	1.31732198325267	0.691176	0.657441486363664	0.504	1.36414350084858	0.555556	0.811823448075093	0.564103	1.32378370203373	0.5	0.82652372821184	0.376471	1.17509169733069	NA	0.612765783770042
Slamf6	chr1	+	0.462185	0.28900913384929	0.4	0.146462739940143	0.7	0.191798109522041	0.459459	0.17492386836218	0.372093	0.299433462781344	0.528302	0.169439939137801	0.317949	0.283830317336407	0.741071	0.258142568046598	0.306667	0.255957769016899	0.460317	0.221403365009183	0.448276	0.270401690963825	NA	0.126898002145594
Slc11a1	chr1	+	0.113636	1.55893632937744	0.155629	2.3667832526346	0.2	1.31652977300368	0.149378	2.06924494953627	0.117647	1.34651138167995	0.164557	1.95420549755293	0.0941176	1.26655373143335	0.132404	2.08116981175601	0.103896	1.53518504376724	0.114035	2.03966480560698	0.170124	1.61488604414989	0.171946	2.4958257338692
Slc16a14	chr1	-	NA	0.415600652549434	NA	0.456084145957239	NA	0.0431162627859863	0.636364	0.439169059922923	NA	0.351467465747842	0.7	0.495809161730159	NA	0.311921820534467	0.695652	0.509781942254843	NA	0.454388159667478	NA	0.48070356196169	NA	0.291268010791582	0.428571	0.575165007896181
Slc19a2	chr1	+	0.537556	23.7156467478241	0.524508	30.3032123591622	0.571429	9.65889665144283	0.52593	29.0250690256618	0.527358	21.669221136838	0.522085	28.2822208154326	0.520601	20.4415026525037	0.510099	25.8380028609453	0.52551	21.0609370774536	0.533252	25.4958935192651	0.526253	20.3442927727367	0.536835	27.2143420231029
Slc30a1	chr1	+	0.378218	12.7991850395923	0.401449	15.9765062651251	0.399217	6.22860623685155	0.408898	22.8967307226027	0.441331	12.5255086505999	0.42268	16.1493724294435	0.389155	12.1172353803734	0.370787	14.1060655719176	0.41194	12.3372309985574	0.42987	13.6365480737783	0.346555	9.82937391844646	0.438462	13.2115468934555
Slc30a10	chr1	+	0.0461538	0.496188471130286	0.125984	0.689496459794731	NA	0.30026975126985	0.1	0.55943174543972	0.108434	0.478508951412389	0.0813953	0.614125477411023	0.056338	0.507612320691572	0.138686	0.767091315982474	0.0714286	0.452646052903845	0.169884	0.886087679033069	0.201439	0.686336178396431	0.114458	1.05224257581453
Slc35f5	chr1	+	0.191176	5.79828974450573	0.238771	6.73314205518407	0.231405	2.04736611162211	0.25062	7.00654668763109	0.238532	5.33862516717469	0.215847	6.86409673297572	0.20598	4.96876043909566	0.24058	6.34926770208908	0.183206	5.52294512372555	0.25977	6.17358491544002	0.186398	5.16180356198325	0.183761	5.56196064206205
Slc39a10	chr1	-	0.542362	27.8359296631796	0.52102	22.6525693965692	0.528777	4.81949977662277	0.547082	20.3622288609505	0.535044	24.3453336144692	0.51976	26.0131665931747	0.532743	20.944730812879	0.531849	25.8973083753627	0.538117	24.4467446299654	0.536424	24.6086964446198	0.525926	24.7219558280709	0.537118	22.6254637186906
Slc40a1	chr1	-	NA	0.111308335568196	NA	0.11858570255388	NA	0.050182539187023	NA	0.160327144331465	NA	0.1034288237201	NA	0.157363600378464	NA	0.0774490327727062	NA	0.139653101257119	NA	0.0674293096106551	0.818182	0.129072011706881	NA	0.0751023363210294	NA	0.0991745425137859
Slc41a1	chr1	+	0.537297	12.3896238745748	0.555334	14.6633533623852	0.500883	7.48079448173976	0.552687	13.2280576219587	0.537782	12.1847213662774	0.53523	14.9136741608761	0.523107	11.5399824672164	0.554221	14.8639854735336	0.523773	13.3430962828902	0.549432	14.7286124528395	0.509801	12.7489477678512	0.538938	14.4643001337289
Slc45a3	chr1	+	0.578616	1.06313830895458	0.548023	1.21841095121201	0.505051	1.24223967339192	0.583333	1.31720818704187	0.440559	1.20015027523937	0.542484	1.19248307892746	0.397661	1.41135421174752	0.522876	1.35554322569168	0.485981	1.44608266636247	0.42654	1.32515786149406	0.430108	1.44738341118272	0.6	1.44795388761357
Slc4a3	chr1	+	NA	0.149264361497937	NA	0.135856427620085	0.527778	0.195384511220087	NA	0.193228540885167	0.769231	0.167452396235407	0.7	0.174785784244303	0.727273	0.199756821191212	NA	0.182296410421204	NA	0.175742507416455	NA	0.193194755095475	NA	0.174676907363715	NA	0.203446787991997
Slco4c1	chr1	-	0.900585	1.05882394393646	0.863063	2.46253598278971	0.92	0.139873092110529	0.869565	2.05501933535923	0.907317	0.963125602910086	0.874179	2.19956481992002	0.877095	0.712643366086615	0.872777	1.74369755010469	0.890625	0.952816003055783	0.832599	1.74077719077819	0.917808	1.11959812703518	0.840684	3.16800830792815
Slco5a1	chr1	-	0.795518	0.519493973093173	0.935654	0.982584606374301	0.972973	0.178773147138058	0.91573	0.78329052501273	0.754032	0.434004255733464	0.901587	1.01207417834787	0.878873	0.374258244852285	0.937738	0.870746838344396	0.830508	0.528072317115268	0.901247	0.868092926565814	0.858044	0.454490046245097	0.915679	1.06263291499128
Smap1	chr1	-	0.511312	12.7411071177057	0.531323	16.383250208436	0.550725	10.0157329680349	0.537538	15.2234343784791	0.552083	13.2753245899833	0.511905	15.7898102118011	0.593846	13.3941951133337	0.535256	15.2243497138507	0.537356	12.3386483287552	0.590028	14.9156350456127	0.576389	11.1830704992712	0.545833	15.5644388315482
Smarcal1	chr1	+	0.486011	7.49298158484621	0.524702	6.26204085257693	0.465974	7.72082195089727	0.49676	7.27487470866651	0.464258	7.21647622728461	0.505609	6.89032025585428	0.5028	7.63388514183039	0.477114	7.07590469342671	0.478235	7.34357365696883	0.520793	7.50148202837795	0.486077	7.56311644573682	0.472687	6.4574262178669
Smg7	chr1	-	0.53618	33.0210742688008	0.521495	37.8476299979733	0.55959	20.2509219168726	0.51735	45.6770657360451	0.532544	30.3945012814309	0.527338	38.6124751109679	0.539755	29.4935607742391	0.527928	38.1952589249495	0.513524	33.7556264444223	0.514407	37.3799364222054	0.529024	32.102962087707	0.495292	36.8570824643254
Smyd2	chr1	-	0.431408	17.2370195768563	0.465975	15.027728891018	0.443646	32.4677519271564	0.459395	15.8894837725366	0.483779	19.2608585394293	0.430666	15.254930231306	0.464875	21.2934955764489	0.45756	16.0713712736003	0.469151	19.2438277357738	0.461662	16.035351259107	0.469055	17.842678724779	0.539267	13.2653707178359
Smyd3	chr1	-	0.531704	2.8786442606914	0.491722	3.798805987941	0.544564	4.51839561242738	0.507669	3.58190494096569	0.581019	2.96943291368938	0.526532	3.71050176797243	0.545329	3.09688308659995	0.54012	3.45213330327792	0.524911	3.04737912874553	0.537132	3.5497704692062	0.557289	3.17287744910272	0.534961	3.89527885186987
Sned1	chr1	+	NA	0.150078901772654	NA	0.196029240596432	NA	0.0418760626236668	0.818182	0.276423463181998	NA	0.0858183528390884	NA	0.205561847485839	NA	0.121966751265776	NA	0.238073521822864	NA	0.090269610689393	0.75	0.231628681097656	NA	0.0870430617986855	NA	0.233228931504341
Snhg6	chr1	-	0.609222	40.3611090809906	0.626528	49.9378874770547	0.652844	57.5549059387919	0.600388	45.6842061271318	0.621939	40.2072783309813	0.645583	49.0931052681932	0.659154	42.7939214366767	0.617998	45.6815735949298	0.661246	37.4838016160248	0.622134	48.5137243799467	0.657727	39.5062755196573	0.604751	61.1403266020853
Snrpe	chr1	-	0.511691	104.286915302249	0.495808	87.1241896314218	0.497677	254.236740513334	0.51129	88.8746945055022	0.503017	114.59764781943	0.524563	87.595356895384	0.48852	131.865566719096	0.510858	88.6035727437313	0.493549	105.827358412264	0.49356	91.1048354992074	0.501937	107.517132354632	0.478832	89.6474253830883
Soat1	chr1	-	0.353023	3.83684641551079	0.401477	6.07336531434938	0.411552	1.81561257089276	0.406509	5.2072343884594	0.31288	3.24436497651269	0.395958	4.79117663395209	0.338999	3.07524200886854	0.378967	5.50840285943459	0.352174	2.80619553174889	0.403644	5.52143344283311	0.327526	2.78057368158239	0.412973	6.65850038472702
Sox13	chr1	-	0.52201	15.4131520154621	0.542155	14.8841616960929	0.517063	13.2895280956506	0.535649	12.1110675944434	0.516016	15.1417117459842	0.504315	15.3466153666959	0.54334	16.0092723869304	0.508501	14.5414363006673	0.548098	15.6881872122902	0.544998	14.4867091959299	0.534346	14.6738678920379	0.530681	11.3558531124204
Sox17	chr1	-	NA	0.134484937606953	NA	0.169250793160427	0.25	0.162788287220267	NA	0.125226947298447	NA	0.14934812205497	NA	0.190792294794869	NA	0.195628132564875	NA	0.124294508874782	0.2	0.162081694370072	NA	0.183226904648386	NA	0.144266153173254	NA	0.160857283959913
Spag16	chr1	+	NA	0.0971932077098843	NA	0.0831580177977443	NA	0.0347212128023754	NA	0.0969668498322126	NA	0.0903129051000652	NA	0.0811896585305077	NA	0.0772887302211364	NA	0.096041142998371	0.681818	0.0774051976606817	NA	0.0997198922975277	NA	0.0499645939450965	NA	0.0950105019942833
Spata45	chr1	+	NA	0.185605549675228	NA	0.228025066335844	0.583333	0.535544884604593	NA	0.172828398488824	NA	0.344933083058634	NA	0.0856823669076899	0.4	0.393586276089416	NA	0.167457198292056	NA	0.141098299580538	NA	0.0987418169375607	NA	0.247372649278753	NA	0
Spats2l	chr1	+	0.701031	1.47942772837345	0.676471	1.51023715275648	0.564516	1.05819566528437	0.576779	1.31776728277776	0.639881	1.3819343674205	0.645455	1.4917249286528	0.598446	1.51700319135695	0.614035	1.37692120364904	0.593052	1.46354902898245	0.631325	1.4244621484474	0.619159	1.58778723723107	0.627119	1.27874848499308
Spta1	chr1	+	0.210623	1.42297588084341	0.191304	0.635480753826425	0.272727	0.262848590355308	0.153226	0.640700964204879	0.154275	1.2907257629398	0.163265	0.70834646876013	0.192913	1.12770732964666	0.1	0.654305897374975	0.183352	1.50905245336477	0.256281	0.610943977442274	0.190887	1.49827520607426	0.175	0.591301730104896
Srgap2	chr1	-	0.634389	7.04746932068986	0.62339	8.40781613325826	0.567288	4.1798539168707	0.590429	8.18926358965802	0.6481	6.48720446148488	0.615968	8.68486294432423	0.6264	6.03826292390368	0.60694	9.25477893797514	0.612558	6.94725263265643	0.596435	8.76049428132771	0.617122	6.62028689199308	0.567674	8.84611651823603
Srp9	chr1	+	0.442866	9.60181288735868	0.448074	8.83158859725735	0.447069	16.5137776490918	0.442806	8.99869010775776	0.467011	10.1584380362612	0.471589	9.04506424282918	0.442497	11.0566596210242	0.418077	9.25170043550749	0.441558	9.37383153764481	0.440854	9.08240276589806	0.43146	8.9975517525916	0.431248	9.54910700630843
Stat1	chr1	+	0.333582	0.967142931540162	0.358754	0.572437592638885	0.503383	0.94079017870675	0.362129	0.787737488622388	0.324757	0.990798636797933	0.295837	0.744453747212598	0.336504	0.961786646551577	0.318421	0.743379545709167	0.397006	0.962996722096121	0.333844	0.712004241555746	0.359384	0.942522869616485	0.319118	0.615566125947636
Stat4	chr1	+	0.69697	1.10361481667685	0.616162	0.484229366721714	0.755396	0.951809317638163	0.681034	0.579695253264596	0.618421	0.950362504885508	0.82	0.578518253836959	0.648746	1.03190606405119	0.77193	0.532501204417352	0.658986	0.971119736128175	0.851351	0.506472586593085	0.721951	0.779083292586437	0.862069	0.405714037556397
Stau2	chr1	-	0.487047	2.41275293861697	0.471572	3.0418466117224	0.564103	1.02284019401206	0.55298	3.07187301075689	0.547511	2.03500464633812	0.56746	2.9751731961464	0.5	2.15477840020614	0.52649	2.9512873053073	0.590361	2.23629755934168	0.452055	2.88620413733743	0.607362	2.01289548214804	0.502326	2.90776760042643
Steap3	chr1	-	0.884115	1.83231487438787	0.822597	2.09209507165708	0.866391	1.78918533416409	0.838301	2.84362945883375	0.874572	1.89857043541325	0.830489	1.99264851515715	0.90316	1.77069920259309	0.840104	2.25362520298138	0.870476	1.81352257745501	0.82715	2.19218064079252	0.891795	1.51562603482509	0.816817	1.83980489891716
Stk11ip	chr1	+	0.656747	5.38565275048101	0.614833	5.16330065757371	0.670295	5.03625427230238	0.655531	5.97423104421619	0.663808	5.58689890447846	0.637318	5.52604270305991	0.641718	5.79552878879862	0.629977	5.42216669134585	0.687265	6.12472593364084	0.620821	5.5374679155952	0.664781	5.73435042256162	0.640216	4.97029720116974
Stk16	chr1	+	0.433276	6.53409863301848	0.501639	6.35257747610155	0.482363	10.5763200119264	0.564356	6.76820694610275	0.5	7.59104725883952	0.542994	6.70768903963003	0.496583	8.02260897247156	0.503636	6.75478651274978	0.528646	7.49829093279959	0.482759	6.71541610838399	0.53004	7.2032637758107	0.5	5.14048126734802
Stk17b	chr1	-	0.526316	3.95167400352253	0.447785	4.99296834621159	0.745098	1.89890341147423	0.48628	5.15543057252402	0.576271	3.73645352807546	0.529753	4.48743150273344	0.493392	3.34645118186517	0.488333	4.30067333809698	0.501062	3.15095951314639	0.571429	4.09776635916394	0.502825	3.3097172322768	0.484211	5.32271778027702
Stk25	chr1	-	0.528134	9.39918170433219	0.534337	13.6657223072439	0.461538	9.55195104126286	0.5	13.1708402995191	0.544118	9.73982933281268	0.535714	12.5893422097235	0.538284	10.1020787911086	0.53252	12.2245195369153	0.507403	9.69222961712606	0.542857	12.7100527923511	0.551267	9.55146999265214	0.489809	13.5667088387837
Stk36	chr1	+	0.0878244	1.15018541370643	0.146453	1.05082997888039	0.077686	1.31065535002677	0.198397	1.24535610013566	0.0826011	1.29923722898749	0.14121	0.972131698241471	0.0806962	1.15247955955746	0.0612691	1.15180479328581	0.0945946	1.13872341116606	0.112026	1.2108566198203	0.122318	0.981996785306816	0.12844	1.12871321804567
Stradb	chr1	+	0.462882	1.29001314004796	0.440678	1.66567345693659	0.535581	1.04818986207073	0.488673	1.54871489775934	0.457399	1.2327697321414	0.541311	1.5794163533924	0.474777	1.39636068202878	0.573209	1.58622000192165	0.42042	1.22502337082072	0.5	1.60611267546129	0.497326	0.983285825592309	0.550781	1.45153478706781
Stx6	chr1	+	0.477679	2.13667112614751	0.509434	2.23992771988023	0.520888	2.25545438888145	0.433705	2.48834765531927	0.49125	2.37921785315521	0.465322	2.25668628953773	0.469866	2.17418768386829	0.434492	2.18531355151349	0.437722	2.03262290167883	0.447917	2.25109899203412	0.451327	1.92280432372163	0.435993	2.12800578954089
Suco	chr1	-	0.53271	6.67274957744068	0.548272	8.1902450951963	0.607407	1.95671433039723	0.504253	8.24425789013014	0.561688	6.20527327289978	0.552803	7.61922386213617	0.523605	5.60735904759188	0.522613	7.76184496045537	0.536111	6.15356424874278	0.537383	7.73822078510624	0.533241	6.25151802672249	0.524613	9.363596423227
Sulf1	chr1	+	0.475918	5.52987527981384	0.466823	3.99449683675238	0.476861	2.12584859647948	0.426018	3.90771119850989	0.458985	4.8563823272264	0.441009	4.50161934925075	0.442653	4.66079909111344	0.465707	4.0175938392784	0.443257	4.92133728254518	0.442978	3.76693824188954	0.443706	3.5831098123766	0.462171	2.56691183527801
Sumo1	chr1	-	NA	120.366212225254	NA	102.618501743284	NA	117.844846070057	0.909091	100.89601467803	NA	128.204753787986	NA	101.77491318567	NA	140.312417290478	0.882353	103.562973965954	NA	116.935170466421	NA	103.524754495087	NA	122.282472938889	NA	103.643129559421
Susd4	chr1	+	0.197055	3.80161026538442	0.200568	4.269204919398	0.211928	4.7341723593854	0.26007	4.54860930710883	0.199765	3.33645420607584	0.279476	3.77588732301135	0.188623	3.60380622113611	0.255537	4.41822810606906	0.222685	3.19843537033434	0.260334	4.70106258461827	0.207394	3.80897454816349	0.221814	4.29859175716829
Swt1	chr1	-	0.629917	5.20622244348377	0.647714	5.16477661473253	0.691903	2.85203772654362	0.685721	5.44714630919469	0.624212	4.79245172676052	0.619378	5.15051037827464	0.646514	4.71183041811631	0.623212	5.40299923535057	0.655663	4.96320169229019	0.631459	5.37013876171228	0.628484	5.23741257178522	0.634141	6.5258622012919
Syt14	chr1	-	0.577895	1.64695282451697	0.564479	1.97728994014206	0.544828	0.569052854234628	0.607893	1.96364106391824	0.601533	1.38271040724007	0.580396	1.8208668161362	0.615979	1.09355556913753	0.629768	2.10761460300731	0.590389	1.51845777586222	0.6	1.88429177891236	0.626738	1.36333779406296	0.61383	2.07137417352797
Syt2	chr1	+	NA	0.0655783595256457	NA	0.132178709243512	NA	0.0354786215776282	NA	0.087779388217375	NA	0.0304680352671151	NA	0.0775755600884584	NA	0.0407409203368938	NA	0.0905981883227117	NA	0.0763374190407582	NA	0.0915798679216654	0.0909091	0.070467846334212	NA	0.243067221243529
Tada1	chr1	+	0.24	1.4929128949384	0.35814	1.33347505337762	0.365915	1.61756272299192	0.318033	1.5603615020094	0.358621	1.50755060121223	0.246964	1.27991249525758	0.292958	1.53848182932227	0.251101	1.33662896060902	0.243056	1.72843700461834	0.4	1.43751027872274	0.308605	1.586711971746	0.333333	1.30736659693356
Taf1a	chr1	+	0.424242	7.86210418182892	0.410769	8.0165387761929	0.451962	8.93911632043806	0.439266	8.75479745830524	0.413374	8.30175704088989	0.415858	8.26671822457328	0.457393	8.48412060661694	0.439597	7.11680348662219	0.437048	7.54757783935836	0.393289	8.15093409405124	0.376378	7.36266850469757	0.407745	7.49922568049449
Tagln2	chr1	+	0.621982	29.2530214582032	0.65374	35.176699756714	0.651033	51.4812112386064	0.708365	30.4454960570056	0.667474	28.4606241783831	0.656542	30.2848345196982	0.66396	33.0071101743087	0.683252	31.4324614460459	0.674699	28.9080732336577	0.676357	32.6309692141735	0.649038	29.0381271558255	0.668273	35.805725320251
Tatdn3	chr1	-	0.59	0.876463248932986	0.614679	0.926648526485226	0.535714	1.19962566757205	0.538462	1.0724748609264	0.612245	0.897948554820503	0.769231	0.767717287985533	0.572917	0.746115118048004	0.625	0.978316288035749	0.566176	0.892660299942585	0.464789	0.937037159764429	0.673469	0.867118384180347	0.602273	1.15976546844908
Tbc1d8	chr1	-	NA	1.69703250687338	NA	2.05368366912075	NA	1.30346247997138	NA	2.12270924577744	0.9	1.69905385405824	NA	1.97508295483797	NA	1.67261020249184	NA	1.99204491907303	0.642857	1.80794708633489	NA	2.20538783248832	NA	1.88986282464638	NA	1.92518629006528
Tcea1	chr1	+	0.44951	103.09948417147	0.484545	87.4916005395997	0.48	56.8498142973068	0.462009	85.4318022224858	0.44841	97.4401851242748	0.507132	94.8585309256137	0.502872	93.9210253778346	0.475459	91.2163651583996	0.479751	86.7658200856793	0.470648	84.0616546782166	0.460168	83.2755548909349	0.498931	91.0440051106172
Tceb1	chr1	-	0.501377	36.7523727585318	0.497996	33.2348606454593	0.528878	54.9553530594701	0.516547	33.1048627948736	0.506208	40.3896008110956	0.506909	33.9086220921532	0.519077	42.1295023069264	0.489557	34.0641477037266	0.522033	37.1882302974981	0.514905	32.9566640129973	0.520135	36.901737294553	0.500427	33.4905809693117
Tcf24	chr1	-	0.745902	0.776477179911694	0.620865	1.03878387899216	0.741935	0.301597898285948	0.724265	0.903780272882966	0.747899	0.763135996623085	0.629454	0.923699372892759	0.609375	0.638240087284873	0.668224	1.04409476604229	0.797297	0.567578818568666	0.677083	0.97710361754669	0.704545	0.668690807532817	0.706522	1.07713061437582
Tdrd5	chr1	-	0.333333	0.284307996374365	NA	0.284834107837202	0.285714	0.22917440412929	0.259259	0.348779351291798	0.26087	0.274665253275006	0.428571	0.289576838887389	0.15625	0.292473411410758	NA	0.242258126422513	0.304348	0.332775298640718	0.23913	0.28809779080528	0.370787	0.380726369798117	0.5	0.375710966882268
Terf1	chr1	+	0.545401	26.8623754172758	0.490754	24.7950785375801	0.591229	29.5645725007297	0.484424	23.6119423223325	0.555514	28.4359824491694	0.510257	24.4814306551796	0.530703	30.9477388559185	0.519704	25.3605471581518	0.525936	27.9535185560409	0.524478	26.0307150626088	0.50631	26.9817529903351	0.506551	24.9214778121556
Tex30	chr1	-	0.485477	10.280742150538	0.508671	11.7417518062947	0.357143	9.37991386673326	0.467049	11.2530191457042	0.502907	10.9122846287635	0.510582	12.2832449847199	0.514706	10.9736696969338	0.501618	11.4605585038789	0.507082	9.55773703203989	0.5	10.8500389702348	0.549383	9.19607181501009	0.549342	13.2912424266139
Tfb2m	chr1	-	0.181818	5.23618585540027	0.153846	4.16629608097401	NA	2.73176276087988	0.192308	5.18240704508076	0.197368	4.84995515114926	0.344828	4.53550217982123	0.181818	4.63883325623664	0.190476	4.43711808118297	0.158879	4.81233765409601	0.325301	4.48137834581207	0.188889	4.43275201894806	0.344262	4.57108340744711
Tfcp2l1	chr1	+	0.602378	136.099848146449	0.610997	120.27531602861	0.567934	81.3665369012831	0.601516	144.704907416315	0.5987	122.068655537823	0.611583	131.675156862734	0.592305	112.062740050795	0.613601	132.827908440122	0.597081	142.830563514122	0.612358	127.624143642905	0.603329	133.167789609285	0.602879	119.68469535877
Tgfbrap1	chr1	-	0.477796	1.56641475472355	0.506716	1.99933945160169	0.437117	1.04060620815088	0.479914	1.90625271033418	0.542616	1.49397124355316	0.497038	2.02709236576416	0.458275	1.49066497443171	0.503899	1.98344392604565	0.4631	1.6256868034093	0.456995	1.86929994727958	0.467717	1.36670006854711	0.492381	1.69533149780219
Thap4	chr1	-	0.441096	6.58620206361227	0.494673	5.98230879663855	0.47263	11.6890906741388	0.489826	6.49276976583938	0.46063	6.88077741787251	0.45922	6.04983140161013	0.484848	7.21549934705287	0.480051	6.31481548572888	0.53588	6.54561339064479	0.440197	6.39966330331167	0.496933	6.62238477198012	0.476891	5.74509498924775
Timm17a	chr1	-	0.494401	14.437084573412	0.509738	14.5724209970599	0.461515	21.4508897268314	0.504898	14.2298811860714	0.507195	15.2928272529417	0.508232	13.6900802833148	0.480073	16.8343464906467	0.500352	14.0077143702611	0.500168	15.1827884072016	0.51147	15.1257376429221	0.495487	15.0623335102229	0.5114	14.1467904999711
Tiprl	chr1	-	0.52638	8.9346141365436	0.536638	9.17585282698229	0.539726	8.43704828399983	0.488938	8.7456495853119	0.539256	8.74328370624019	0.576305	8.85906306921869	0.519197	9.15400019639034	0.494938	8.96669604168452	0.502747	8.09447403877222	0.528007	9.20437732234818	0.502103	8.24026182363935	0.540346	9.71667699374059
Tlr5	chr1	+	NA	0.140515154830675	0.3	0.234856297446323	NA	0.0113146434910198	0.333333	0.337755039301436	NA	0.0971669533904907	NA	0.181024123821675	NA	0.137724383509472	NA	0.156258425323464	NA	0.186314560510836	NA	0.146030695445862	NA	0.159403010284718	NA	0.111804285923683
Tmbim1	chr1	-	0.543662	3.70699886234727	0.468806	3.04652764688478	0.538272	3.73901342611581	0.534208	3.69820097517876	0.535043	3.85361016966059	0.534805	3.24676540147057	0.538057	3.87210203289903	0.538098	3.38246167367203	0.515732	4.15756057872698	0.556866	3.50974937357874	0.524855	4.38329326844042	0.539394	3.20815034042146
Tmcc2	chr1	-	0.587537	1.82596905018979	0.507625	2.075210379491	0.49734	1.32350716492549	0.615591	2.06388037965823	0.547368	1.78358845366762	0.5825	2.10733663937056	0.517382	1.77566738876285	0.575639	2.39422802043886	0.553061	1.96509707227944	0.584	2.11326050042607	0.51663	1.81422544696795	0.52862	1.75315222553358
Tmem131	chr1	-	0.391605	19.0533341198069	0.446561	19.4160206914314	0.424763	5.54849458029172	0.43469	20.5087067852994	0.4154	17.0911172920964	0.427817	19.6395308533051	0.418121	16.0121887674384	0.437901	19.4467506525795	0.404615	20.4600029255245	0.428326	19.3194664048055	0.409325	18.9078954663536	0.441865	18.6308644447018
Tmem14a	chr1	+	0.846154	1.8537657663097	0.884615	2.07104483824868	0.944444	2.32674630249824	0.75	1.86640172056682	0.916667	2.11010877408235	1	1.86129245300287	1	1.99007242928705	0.9375	2.00700736842707	0.851852	2.06982467346679	0.92	2.24668695910596	0.793103	2.11242692834872	0.894737	2.48413509893894
Tmem177	chr1	-	0.508321	3.53720882681968	0.482806	3.41030903984923	0.412935	4.27715649772423	0.47541	3.76049626986268	0.488992	3.93546519467756	0.482803	3.56427704160031	0.475921	4.20990648275977	0.495652	3.39423694979704	0.491989	3.82159176781694	0.513602	3.79847149957589	0.488196	3.90759936061228	0.476726	3.37151886821784
Tmem183a	chr1	-	0.529648	32.2365523623169	0.529401	35.7043971346192	0.523466	29.820593741137	0.544924	35.1129696263127	0.543413	33.411133988181	0.546417	34.5641962900955	0.548263	33.0038491929146	0.533396	34.4219297077685	0.519923	31.203917984808	0.525738	34.5180363663809	0.551493	31.2048381131849	0.535374	36.3940518133923
Tmem194b	chr1	+	0.455008	1.22293900581668	0.506135	1.23686201830538	0.437158	0.747846034677477	0.475369	1.52382654069311	0.538721	1.06239032205784	0.483063	1.22711320857257	0.555858	1.08503834564556	0.518987	1.42459278580925	0.569116	1.109569278702	0.499458	1.39943995410892	0.511811	0.990329385414347	0.514638	1.48551638843057
Tmem198	chr1	+	NA	0.212537132362395	NA	0.374388200468545	0.692308	0.548320396228813	0.608696	0.401632767893956	NA	0.319471768554373	NA	0.340516690849597	NA	0.30322568884225	NA	0.310192613715915	NA	0.418185908128475	NA	0.34918481988103	0.454545	0.374911822688845	NA	0.34219969940859
Tmem206	chr1	+	0.42766	3.3033821205332	0.425963	3.33915602483789	0.436464	3.21740233434163	0.391481	3.17980655397143	0.470687	3.60055260668536	0.44898	3.28800042770165	0.449405	3.43599417115905	0.486486	3.39536990659849	0.440594	3.3324369397964	0.47343	3.58708446058679	0.45283	3.21007314640197	0.4525	2.98053500431013
Tmem237	chr1	-	0.549165	3.89844166601932	0.557957	3.14531896912166	0.484988	2.18542962621091	0.599562	3.39213410891947	0.484672	4.0729969889253	0.502058	3.59932889701384	0.504087	4.03790441001634	0.493761	3.29853530231376	0.463623	3.93986535607033	0.527454	3.55536671953494	0.544139	3.85099882767941	0.520942	3.36255250883912
Tmem37	chr1	-	0.910256	2.6147588840212	0.970297	2.86031442859874	0.94382	4.93327662122313	0.901235	2.30134656935118	0.95122	3.05094320541628	0.95122	2.81098291434	0.990741	2.93377138690334	0.915888	3.03773233392957	0.959677	3.1223155883787	0.919643	2.95359294523756	0.913386	3.04572149585665	1	3.06374444836638
Tmem63a	chr1	+	0.263553	3.04203859833912	0.267498	2.29888049402301	0.257398	3.27370687519261	0.280744	2.81964479122568	0.251956	2.97887445876847	0.300203	2.19736232105698	0.252806	3.21154616481721	0.286807	2.45535546023465	0.217362	2.98806746271092	0.261311	2.51095912241075	0.272593	2.82274661224409	0.311734	2.05458212963778
Tmem70	chr1	+	0.633638	12.4791857330449	0.569565	14.0263605708591	0.711386	10.6905352162596	0.595344	13.4139843534068	0.622632	14.1690740049935	0.588571	12.8001295934669	0.628186	13.281536448208	0.598698	13.5790612717596	0.630885	12.7884676404436	0.618503	13.2595069098384	0.596234	11.9049582574819	0.59973	13.7122427902028
Tmem81	chr1	+	0.552817	3.18018891110198	0.599432	3.50201529653798	0.529091	4.89690070203596	0.597884	3.99409454974774	0.548851	3.39471927457186	0.522193	3.78123333366265	0.584582	3.59598501839152	0.555556	3.45007745057315	0.585973	3.43770368183512	0.547126	3.67049951767227	0.653409	4.21783851158738	0.574018	4.03381885507014
Tmem9	chr1	+	0.480813	9.81884677867375	0.534181	9.74027138870552	0.519062	15.2292777030962	0.526127	10.0090847124826	0.498084	10.3296028091699	0.5624	9.62743754243196	0.509419	10.5065770077165	0.530825	9.72392293740887	0.519912	9.7123698081896	0.507686	9.97067773202521	0.475418	8.64622764077393	0.5417	8.15952545671016
Tnni1	chr1	+	0.573674	2.84792811707689	0.646552	2.09127488963261	0.669882	6.46351104728856	0.647266	2.87455233523587	0.636612	3.58768732279097	0.620225	2.27615207690278	0.620382	3.51978193583102	0.638462	3.05981513990317	0.568147	2.94837961630904	0.630372	2.82084799778749	0.548013	2.77809105187512	0.621118	1.92894485189314
Tnnt2	chr1	+	0.380282	0.327108232670661	0.4	0.401867705918511	0.300971	0.762059921710054	0.342593	0.479447201948162	0.4	0.35836346260411	0.284722	0.428780265768703	0.306122	0.33558535733972	0.55	0.486407860415663	0.464789	0.287044274658361	0.308411	0.483391634775597	0.333333	0.343928397754972	0.295082	0.299365879105081
Tns1	chr1	-	0.483096	3.82274782230327	0.443512	3.47907713875428	0.472617	2.54003263307907	0.4428	3.85455186587601	0.499296	3.76926111271496	0.451333	3.85801492189702	0.512415	3.64396420702582	0.441817	4.58862010025743	0.488408	4.77755375879734	0.446227	4.6085815709086	0.478319	4.99900414778953	0.437304	4.01294516747538
Tor1aip1	chr1	-	0.486076	3.45136140392506	0.496868	4.13522150220131	0.585366	2.31920192202845	0.513201	4.6292285813259	0.571429	3.31465847382674	0.516423	4.35210211017474	0.491304	3.10833778668008	0.490942	4.07783781558	0.484375	3.52620467442284	0.490196	4.13126556392367	0.50823	3.2230377407471	0.506112	4.18712496917249
Tor1aip2	chr1	+	0.563853	26.3199596098722	0.581604	24.0558962061494	0.598168	16.6428774353907	0.563717	26.7818021133194	0.580229	24.9837748716109	0.568213	24.8163263905982	0.56555	25.0131593228592	0.571811	26.4535080297953	0.574365	25.8407448301806	0.564537	26.0142268711502	0.556805	26.9093620972344	0.576425	26.1148152575084
Tor3a	chr1	-	0.348033	3.35013566191372	0.32261	4.17632420281381	0.457688	3.07284243038317	0.439955	3.32548127081989	0.417834	3.10924264523425	0.34687	4.23304355318875	0.42612	3.28768926742162	0.347982	4.09660600792634	0.388596	3.13380580153504	0.327074	3.91863192389937	0.41453	3.02634885569068	0.384043	4.27479991061478
Tpp2	chr1	+	0.508697	16.59705525795	0.503725	16.3087699682156	0.54712	4.21796242255839	0.509458	16.2137835347928	0.517359	14.78569453747	0.505981	16.6515010958934	0.497951	12.9115571709467	0.521467	16.2381750841275	0.512892	14.6940527083677	0.502485	15.3538920391096	0.510146	13.7292654907167	0.502417	16.1474025917862
Tpr	chr1	+	0.501727	53.8689102940248	0.500615	43.6992246899286	0.510404	18.9521320537149	0.515098	47.1277597034478	0.517806	49.3903796912012	0.500478	50.44209212721	0.531177	43.7631255915529	0.504312	49.2299965498581	0.507238	52.1931697653224	0.50923	48.7637817635705	0.520335	49.4528658943161	0.501192	50.377190440787
Traf3ip1	chr1	+	0.514881	8.4673198426911	0.530488	8.33417181603363	0.496552	4.32175488343413	0.501788	9.51392708452049	0.517405	7.6014752077424	0.50436	8.26537845385982	0.438573	7.38044513063105	0.496114	8.62094799447189	0.513514	7.89866659232318	0.561383	8.3990129976113	0.518625	7.39828151438302	0.51875	7.74747678829408
Trak2	chr1	-	0.558249	7.87715923203345	0.583609	9.85244903051402	0.606004	2.71699368487753	0.5584	10.0800797957219	0.565728	6.94812088663571	0.58532	10.3025873773601	0.559229	6.14455894027454	0.558797	9.82857359251326	0.57762	7.41691068234317	0.580436	10.0465967752075	0.594676	7.4540764110954	0.584122	11.5223244582538
Tram1	chr1	-	0.476173	31.5084302015344	0.499133	37.297116125817	0.378407	19.0484158234764	0.490842	32.8886830775978	0.491713	31.8216586736088	0.498197	35.7683325880569	0.480345	30.9604555481161	0.508475	35.9576290926295	0.476954	29.9552017245683	0.491961	35.3196075372231	0.443617	27.0767436451529	0.488735	40.1741581325294
Tram2	chr1	-	0.462257	3.11127769533156	0.518803	2.67838735871236	0.426108	2.13175968898964	0.484142	3.26689176463919	0.424194	2.61153509824716	0.462101	2.89425713817536	0.425154	2.42365624947938	0.442257	3.0635960485213	0.424087	2.71891897244055	0.472548	2.91971740503384	0.395729	2.9953741704379	0.532009	2.71751050887497
Trip12	chr1	-	0.50787	52.4570745399649	0.504598	60.0768752580274	0.480937	19.8177651712882	0.501652	56.0742455501697	0.503353	46.406118752111	0.500775	62.6132631640024	0.503246	40.5700683141778	0.50384	58.9227050266833	0.516633	51.3867835952208	0.50807	57.3716365278212	0.510519	49.7553166625345	0.501	63.4095775032544
Trmt1l	chr1	+	0.574297	4.37308164379524	0.564417	2.72081169838686	0.598186	4.39376824653934	0.602696	3.22177308667541	0.585829	4.35932936110191	0.591065	3.09064537663667	0.567132	4.70994333260083	0.585644	3.40715201492268	0.589838	4.49538391996931	0.597094	3.42429429858675	0.573676	4.20284052362843	0.566246	2.36105706620325
Trove2	chr1	-	0.550876	6.56066303557499	0.551839	5.34970442222842	0.671772	0.95810201638278	0.576606	5.96237143358053	0.553153	5.26236553973651	0.546878	5.77858310641566	0.571024	4.19949976877624	0.558437	6.43722366310848	0.565857	5.54244255892065	0.560807	6.10337442052278	0.571508	5.49564488084394	0.546684	7.02568633110448
Trp53bp2	chr1	+	0.445961	9.11245668194248	0.460432	8.74234581794871	0.522563	6.22363442085867	0.432005	8.31360145922246	0.438462	8.68466759832863	0.472904	8.92031403093246	0.483581	8.10840735497088	0.420998	9.00779231561146	0.443823	8.58106331396481	0.466975	9.17163523073767	0.447591	8.54774968615308	0.441469	8.66306913692174
Trpa1	chr1	-	0.911111	0.671933016218108	1	0.324787286603623	0.714286	0.283932171051136	NA	0.376089946824925	0.818182	0.477657745012778	NA	0.332224349848974	NA	0.417533365078553	0.818182	0.38096545346058	1	0.56105026417774	NA	0.383837677546513	0.909091	0.543198538564018	NA	0.347564547303768
Tsen15	chr1	-	0.534853	8.5073266010853	0.523212	7.01016727624986	0.698795	14.5860723913041	0.537361	7.00790660129084	0.542522	9.03538301374861	0.474852	6.86587750234367	0.545356	10.2188413920603	0.513437	6.91803808104999	0.513094	8.80462358682493	0.551579	6.94663393391874	0.577373	7.53410406081046	0.502742	6.10224860873859
Tsn	chr1	-	0.504174	18.0458069947464	0.508252	18.5631397683811	0.480864	17.4006817396806	0.50106	18.5887711711064	0.495287	18.448556182083	0.507385	17.8130792931128	0.515625	18.9927296086964	0.507697	17.8924172103762	0.495304	17.4990331589629	0.499792	18.451812161915	0.49441	17.5219412785245	0.520743	18.2007102596547
Tstd1	chr1	+	0.296296	1.80539039092013	0.301887	3.72625044964964	0.234568	4.12573401759054	0.226415	3.83292323661257	0.278689	2.02988013680776	0.185567	3.53376349977767	0.185185	2.36883781651567	0.214815	3.89297747371232	0.25	1.83910594093787	0.31068	3.44326496237802	0.325843	2.05008299838258	0.32	3.39732861898436
Ttll4	chr1	+	0.468926	14.3532060089931	0.46136	15.4172896558024	0.450482	5.48381484007475	0.447546	15.606977629465	0.452797	12.5901622653775	0.452901	16.1530724186915	0.446876	10.8241859804658	0.453751	16.3385074663828	0.467989	13.5251580358973	0.459881	16.1632139405086	0.451781	12.6386757531659	0.451863	15.6352834752713
Tuba4a	chr1	-	0.395867	52.4943915058939	0.356918	44.5576444168104	0.3664	86.9507066722071	0.387606	45.1748341388382	0.362506	57.5892235424088	0.394206	46.4830428900824	0.392241	60.0497564432876	0.367728	45.1064054647959	0.385739	57.7859870129998	0.372596	44.9346235245597	0.379649	59.5245032536305	0.423541	37.9457180956692
Tyw5	chr1	-	0.572848	5.71369410844356	0.570312	5.09002214271027	0.490506	4.18187826558525	0.5	5.06083157611949	0.495798	5.85309348976929	0.489583	5.19295763938612	0.532432	5.60299779216464	0.531429	4.77278857292589	0.483029	4.97498802682938	0.496988	5.38244879257398	0.523585	5.34916925363458	0.533613	5.48638655060239
Uap1	chr1	-	0.455737	15.8010278625991	0.456127	16.3966566024892	0.453502	13.6787767997896	0.463069	15.9633087429598	0.442678	15.6216590052189	0.454894	15.9866506238284	0.456757	15.6869668500653	0.432426	16.1854556103042	0.429192	14.4090878076005	0.437568	16.4520336296343	0.430919	13.5500018410168	0.446561	15.9198506464538
Ube2f	chr1	+	0.564179	3.84148770365667	0.510345	4.4334525267504	0.495161	5.29385492559235	0.498623	3.9743038903494	0.5	4.22095053260008	0.546697	4.32147154190566	0.487379	4.08242268105073	0.47619	3.98016076869419	0.473233	3.95925254216934	0.536735	4.04589067057345	0.532637	3.28427618685042	0.476027	3.84203209598193
Ube2t	chr1	+	0.519931	6.77680483650014	0.496777	7.44410763693726	0.451394	7.70185659376991	0.552538	7.14884354428005	0.51091	6.66430418772867	0.482321	7.00455713774087	0.503008	6.90621937002065	0.515226	7.49950870700925	0.480794	6.40030102057701	0.467867	7.4164361565446	0.48067	6.63932422705569	0.508834	8.70404387194667
Ube2w	chr1	-	0.506903	5.5403695806875	0.528912	6.15227123578006	0.511737	2.8509382506088	0.466767	5.93650941946492	0.518771	5.78541870510917	0.500846	6.14419621132455	0.457627	5.64540834366104	0.499208	5.7548777806823	0.528481	5.47415609820901	0.506891	5.66521661015351	0.461679	4.9357316365139	0.555777	6.40188770985542
Ubxn4	chr1	+	0.532303	18.9217003155208	0.50591	21.4744527231408	0.503311	17.3289710980146	0.517017	19.527445119261	0.5069	19.4490976671027	0.493667	20.5097729023957	0.510367	19.2491588099306	0.502389	20.6089287594251	0.523893	18.9842073533578	0.513889	20.0405726171809	0.510774	17.2428559243173	0.46716	19.5411526137917
Uchl5	chr1	+	0.532932	39.1345160683992	0.520934	30.1141214082784	0.531902	60.078858897154	0.51335	32.8827574972568	0.542449	40.0986972396102	0.529552	32.4509033597004	0.542356	41.2320363010365	0.553289	33.8817336008871	0.523601	35.4819634719459	0.541351	32.2726354988405	0.540974	36.244183533223	0.509295	32.4699013993954
Uck2	chr1	-	0.528614	64.9256184110151	0.515182	73.5858047321374	0.581498	69.2078198562583	0.520342	66.6580428873118	0.529973	65.2487473212271	0.526312	69.5980219754349	0.549412	65.9216854259999	0.521613	69.3291597979187	0.541804	67.745810977788	0.527947	70.5215809488308	0.532289	70.7383187913942	0.518207	75.3849946766759
Ufc1	chr1	-	0.8	24.8024008603045	0.5	19.0559281130941	NA	46.2901196257339	0.681818	20.5460960544232	0.65	28.2672661566551	0.617647	20.0509432247981	0.619048	31.4005317654559	NA	19.675600587471	0.938776	27.0924412783476	0.7	21.023229957306	0.6	28.4687439129957	0.626667	19.0415121626469
Uggt1	chr1	-	0.532926	10.7071378968434	0.539681	11.5813821197778	0.568935	6.48246117350019	0.526635	11.2435274116866	0.556575	10.131370507973	0.541098	11.6149282444866	0.548508	9.57965968157585	0.531425	11.6104830060711	0.524895	10.9707138944846	0.547329	11.5297069861218	0.561423	10.7748158543514	0.548264	12.2264085890294
Uhmk1	chr1	-	0.520325	9.8310226020299	0.512997	12.0137768902441	0.474265	4.11446025527967	0.52087	12.209267109934	0.53217	9.04531409146398	0.515334	11.549276531307	0.524519	8.46763754142666	0.521976	11.8838660803813	0.50156	9.56672945593202	0.529345	11.4300204608325	0.50943	8.45955831291684	0.489792	13.9113689223695
Unc80	chr1	+	NA	0.169520470781319	NA	0.0828610535415416	NA	0.0536853420610032	NA	0.129938012071271	0.727273	0.173848430215325	NA	0.0963895979040789	0.636364	0.131515984746249	NA	0.0923264972951445	0.533333	0.166588487448585	NA	0.0940339260421689	0.833333	0.161185097433366	0.866667	0.144999298108381
Usf1	chr1	+	0.473124	31.7907822502469	0.458689	28.2026822312142	0.502253	58.3562482782692	0.439777	28.8698978874582	0.473931	33.3190279192758	0.461369	29.2691901775979	0.463007	35.1057988511148	0.455677	28.7376683735629	0.462475	29.676133620521	0.458304	27.5501809643123	0.493485	30.7841068514745	0.45134	25.2566386601395
Usp21	chr1	-	0.579196	9.14941178221018	0.537959	8.17562875561832	0.480082	10.5104774884309	0.565908	9.69023683722176	0.543301	9.35189788696053	0.550554	8.48995274522591	0.47638	10.1754796752318	0.527432	8.63486681778977	0.539071	9.54495186877192	0.528581	8.72467829207779	0.531502	10.5721224068396	0.464286	7.1878605560349
Usp37	chr1	-	0.530012	10.3555814463581	0.53739	9.70963698449925	0.508289	4.87306375478785	0.522762	11.6406890363806	0.524001	9.38493367925453	0.523965	9.91056026539593	0.529942	8.42129802021608	0.51955	9.86172431781529	0.521019	10.0458313606387	0.530349	9.76181509222348	0.533368	9.63771521058604	0.529211	11.0659135326139
Usp40	chr1	-	0.56506	2.44199011410513	0.535777	3.29978452284016	0.578671	1.25094911938538	0.513859	2.78587459498775	0.553991	2.34631109533728	0.5296	3.35150308553102	0.54179	2.12538163963873	0.559194	3.45471634154811	0.514146	2.31249784108254	0.545317	3.37340009564318	0.55291	1.89585264798263	0.510882	3.21960114514049
Utp14b	chr1	+	0.594234	13.7448092212265	0.598338	16.9694048056101	0.505556	2.07500453739595	0.586521	16.7048171194311	0.626883	11.3304161744749	0.589654	16.7458983624943	0.611691	8.99619367057809	0.595453	17.3571490420865	0.59219	11.6591037170259	0.611581	16.8469368732677	0.579647	10.9228796216352	0.570071	19.267163628567
Uxs1	chr1	-	0.524531	9.36338788848485	0.562292	9.24720604996767	0.466459	7.42193551907895	0.540246	8.45286957825123	0.548996	10.0560028359412	0.570413	8.89164545987789	0.522814	10.3763014037006	0.554779	9.28182253694538	0.538863	9.22854484959732	0.536644	8.80264797226296	0.526498	9.020040589469	0.571297	8.23049469949606
Vamp4	chr1	+	0.480663	4.90669514575163	0.50278	5.00130400013358	0.437642	2.30323014468019	0.489939	4.72217159148138	0.432476	4.75689041732949	0.496416	4.73916397590148	0.444144	4.74437432804169	0.413353	5.28075266035695	0.486334	4.24881546287099	0.470743	5.17145395454911	0.417069	4.30762213801888	0.491097	5.69759376115345
Vangl2	chr1	-	0.344343	10.2873623980746	0.313768	10.5724360263208	0.374653	6.99109537343676	0.298625	11.2327003058084	0.372606	9.60905930672121	0.323406	10.2175384917715	0.369473	9.56775719852277	0.342857	10.7704684785895	0.350677	9.25727305384353	0.340959	10.8218206132753	0.366337	9.10754607841573	0.280825	9.14534000193649
Vash2	chr1	-	NA	0.261241747248026	NA	0.19056267278797	NA	0.142381613270552	NA	0.310829377470705	NA	0.316921595630522	NA	0.190948139881903	0.52	0.294300169238626	NA	0.212782694012738	0.3	0.237213475681761	NA	0.214261045051578	NA	0.176991288656421	NA	0.13241663534525
Vcpip1	chr1	-	0.535099	8.31687000620143	0.519753	7.91622266080276	0.544118	1.14705888116075	0.542393	8.89701354839705	0.541176	6.88966299661312	0.483146	8.13532204233725	0.527504	5.99568073118425	0.511008	8.23518738979913	0.585106	7.24283377292924	0.535714	8.12948802967546	0.517815	6.83950739532471	0.562121	8.64646570468945
Vil1	chr1	+	NA	0.352638348392623	0.545455	0.495509835083227	NA	0.330687529421666	0.277778	0.537693758670336	NA	0.24575632220173	NA	0.459884199291082	NA	0.301452062628609	0.181818	0.461328626253192	NA	0.284832341357315	0.482143	0.534668447219211	NA	0.334869142518436	0.555556	0.774181447052139
Vps4b	chr1	-	0.542505	15.0902557335708	0.543264	15.5514503593505	0.501479	4.11220690573323	0.535986	15.3035455004768	0.546033	14.0889831918274	0.543511	14.8964287328436	0.554067	13.1740077904564	0.540159	15.3925102135707	0.571429	13.6925349720326	0.562559	14.9399141115719	0.558668	13.4560109601575	0.512195	15.0809898932755
Vwa3b	chr1	+	0.80402	2.58650833149963	0.749425	2.62691353922633	0.84022	3.89422467111179	0.816327	2.61411777038442	0.806236	2.51412839407352	0.771894	2.5275820987303	0.746269	2.7339393531212	0.771889	2.56433991844266	0.779541	2.31976502559537	0.786355	2.70410680588067	0.722338	2.33794251574934	0.785714	2.48580825090254
Wdfy1	chr1	-	0.346945	14.8565875796195	0.333129	19.3064356652698	0.411252	5.34341944697333	0.363956	19.802765627198	0.332851	13.5157006297115	0.348782	18.2362134280656	0.353722	12.3358935357487	0.335609	17.9096265089087	0.323563	14.2725453522372	0.338572	18.4359251437656	0.340676	13.7382793090334	0.351131	18.0522736155874
Wdr12	chr1	-	0.499653	14.7951402751013	0.491016	10.8262887319188	0.506457	23.8322356492408	0.522374	11.3163495964767	0.503027	16.9754827952465	0.488682	12.0800024985173	0.499773	16.4900221507544	0.490379	12.2900556763064	0.52431	16.1215222933616	0.518394	11.5097525475615	0.503047	15.2947850129318	0.496589	10.0269568830124
Wdr26	chr1	-	0.419283	21.2053867503057	0.442234	25.6805821889399	0.501059	8.41363214351233	0.432729	26.0711756570882	0.417619	19.5263418634421	0.446602	24.4895445777148	0.423552	17.033965677811	0.443089	23.8663421551022	0.427907	19.2817622395822	0.433496	23.6288236879792	0.40879	18.7867486307638	0.443718	26.2266622748613
Wdr75	chr1	+	0.577363	40.5278051026254	0.595427	34.196244430333	0.663099	29.3291338211829	0.588963	34.6413714820825	0.591102	40.1136291893523	0.590577	37.1646159002941	0.584197	38.789433578546	0.572789	36.2364732376791	0.582127	40.1224629071036	0.593241	34.5257009853457	0.587266	37.0249409060204	0.612752	32.7555298190736
Wnt6	chr1	+	NA	0.892605764671394	0.272727	0.855354063844195	0.125	2.01096452654566	NA	0.744717989595394	0.217391	1.00857258531804	0.0769231	0.949385642086666	0.214286	1.27765161760892	NA	0.708688234256069	0.333333	1.23769986511615	0.153846	0.900343382815249	0.4	1.27340488135565	0.344828	1.08313802362228
Xkr9	chr1	+	NA	0.0975248267244708	NA	0.239627587883566	NA	0.103179052534066	0.6	0.249730754410382	NA	0.151035081366969	NA	0.262622831072203	NA	0.245582714065657	NA	0.197975098915374	NA	0.129743036634026	NA	0.149163715669695	NA	0.194969720459578	NA	0.305865411491115
Xpr1	chr1	-	0.534973	1.8208997848824	0.570382	2.26663675070108	0.566751	0.533484174981506	0.625926	2.46832719664265	0.550918	1.46911012719039	0.605917	2.18958700910111	0.555105	1.32268542307174	0.589257	2.31105294252883	0.542298	1.57326182313056	0.554688	2.25855062702072	0.551511	1.50302680910934	0.612364	2.36421459737562
Xrcc5	chr1	+	0.588007	59.0760550327607	0.601621	48.421502134472	0.564286	45.9102472402671	0.602741	48.9566821794213	0.594054	58.7707472161009	0.597655	50.3690472955469	0.589444	61.2517486822834	0.605713	48.3029796916101	0.60047	58.3600791111628	0.584261	48.6042777750072	0.5924	63.2172568745312	0.642191	51.2206429786073
Yod1	chr1	+	0.507194	2.130284061824	0.395604	1.92756159922696	0.477612	0.737015099026121	0.428977	2.39510791511075	0.488372	1.79435000354816	0.454237	1.92438569227141	0.441176	1.47667912343755	0.446108	2.14783167583081	0.440828	1.96120803371491	0.385749	2.32980253591603	0.429319	2.09570814472847	0.394052	2.32173300734787
Zap70	chr1	+	0.474138	2.31756733534424	0.568807	2.54998252032005	0.442408	3.43562544353937	0.481618	2.39185184330182	0.447811	2.51809604875035	0.54232	2.42955711459575	0.432836	2.34216391961482	0.519451	3.17655633867982	0.401274	2.05612730430415	0.478355	3.2688260684348	0.418338	2.41806764669981	0.520231	3.31730889531407
Zbed6	chr1	-	0.500511	0	0.49688	0	NA	0	0.538694	0	0.513748	0	0.522738	0	0.516974	0	0.526027	0	0.536397	0	0.518852	0	0.508259	0	0.537825	0
Zbtb18	chr1	+	0.541667	4.6948003523884	0.529412	7.34992624214424	NA	1.68648650757561	0.430233	6.95515574730979	0.75	4.37430371580152	0.577982	7.13876408443807	0.75	4.02738215036119	0.604938	7.0818189342221	0.625	4.40262095698343	0.572917	7.19169566695234	0.608696	4.2049803816108	0.577778	8.22770618098241
Zbtb37	chr1	-	0.535581	3.0242208246797	0.607843	2.87853770324023	0.771429	0.493556768957517	0.59673	3.71390903256301	0.560606	2.47848616690012	0.597855	3.4397245551255	0.59	1.84716101944654	0.623955	3.44010584250098	0.537037	3.01435185566801	0.575342	3.29366729345943	0.588083	2.86081327894499	0.519337	4.1283894018256
Zbtb41	chr1	+	0.529486	3.5106847803094	0.491597	3.76875893492904	0.546341	0.593587749240786	0.467772	4.47840215930208	0.485795	2.87257397128872	0.491597	3.93294304444426	0.486181	2.52499652764078	0.467195	3.71548981273957	0.483516	3.25672232762387	0.511005	3.72940789586243	0.502973	2.97876131559004	0.489168	4.52235913862863
Zc3h11a	chr1	-	0.534612	3.69582062635239	0.522619	3.25709855365624	0.570968	0.0299547572663377	0.537398	4.73192367617325	0.532333	2.63352491170915	0.533268	3.69501122779301	0.526949	1.93177704502119	0.519754	3.53582454338772	0.525363	3.16867180063921	0.531274	3.69899518469344	0.528949	2.89318125328898	0.50956	4.32151712363172
Zcchc2	chr1	+	0.477905	9.29135609471289	0.508034	9.63847716458143	0.434185	3.96837652667618	0.478369	10.106243080829	0.467362	8.16554645858214	0.515373	9.80731283246596	0.473118	7.69541351192807	0.485658	9.54615624829096	0.46616	9.21343012837717	0.505446	9.69358503875933	0.465511	9.30186893612986	0.482641	9.41587175558256
Zdbf2	chr1	+	0.474766	16.696332767937	0.503255	14.8669181990275	0.563337	3.93595382794939	0.518559	17.4720422784364	0.469687	12.8913256122814	0.491276	17.6437268916061	0.492053	9.70385346944655	0.517785	17.2536781810724	0.470588	15.4477392156453	0.485784	17.3168685707919	0.477201	15.3519087042197	0.49586	20.093597450842
Zfand2b	chr1	+	0.514723	6.87236319879117	0.542337	7.01595296514092	0.549922	9.60378255592733	0.526971	7.51790529032215	0.579864	7.74019845965443	0.509886	6.94858851811663	0.544597	7.72679603807029	0.546201	6.94156707810991	0.512532	6.88976945231697	0.503247	7.86669145843295	0.512716	6.51282487659793	0.461279	5.94375644185331
Zfp142	chr1	-	0.514073	3.55098587050454	0.480724	3.28588538512857	0.505508	1.78509301879545	0.508217	4.37833464885016	0.483781	2.94480101220909	0.490819	3.52798560576741	0.519562	2.75361346940514	0.530084	3.5246483513812	0.504836	3.53048945649696	0.521563	3.4408936175832	0.495702	3.31583484006541	0.444328	3.1379506503173
Zfp281	chr1	+	0.443631	32.6053724011607	0.414966	27.1157460213446	0.436364	8.04303010085224	0.455108	29.5223717626578	0.428155	29.3957464924056	0.425021	28.2565995008119	0.456175	25.5775772494572	0.408113	27.8811656116012	0.436108	31.2823342147539	0.438338	27.9747247599036	0.431605	31.6894234581239	0.438433	30.0838150432744
Zfp451	chr1	-	0.525949	6.24666557048573	0.50348	6.31301123147485	0.479806	2.79100968625748	0.515597	6.91629302122663	0.47534	5.94312508291282	0.489249	6.58125760733242	0.492424	5.49705953907367	0.499661	6.28585625636352	0.523026	5.97255855507115	0.503681	6.27104984079592	0.506459	5.54610135636703	0.523536	6.7950121236701
Zranb3	chr1	-	0.528397	6.14627152409676	0.482682	4.53217714249392	0.545231	3.44639462869177	0.490467	5.16127896570168	0.493218	5.71117725152036	0.447397	4.78170334752338	0.488757	5.60732557149803	0.495208	5.15642379562932	0.47182	6.11806205521218	0.506865	5.13859310630205	0.481864	6.13651464854613	0.505192	5.45432675052137
1110008F13Rik	chr2	+	0.513052	25.2864449630336	0.504376	26.8407781388367	0.508467	56.7644747343115	0.526885	24.4138322754193	0.518527	31.3589546839449	0.511514	24.8866240250504	0.502497	31.9958498579586	0.515551	26.3211491256682	0.522611	28.9130778685801	0.527684	26.7741652355866	0.526638	26.717004352448	0.554118	25.0827651724522
1110034G24Rik	chr2	+	0.547273	2.31426828424368	0.574742	1.43067687463668	0.518215	4.65083334364379	0.529167	1.7005541568202	0.527523	2.37029476891615	0.495	1.55644832394999	0.497103	2.69286821891739	0.531915	2.03461418771949	0.527957	2.59682189336653	0.456439	1.85268007112747	0.543529	2.56017254188362	0.469453	1.61902323536913
1110051M20Rik	chr2	-	0.391304	0.535599149306306	0.521739	0.665401866008864	0.296296	0.729296417250853	0.609756	0.610802094723349	0.642857	0.486500198077893	0.490566	0.66674783014673	0.410256	0.485731390659273	0.52	0.670547723854214	0.44186	0.535262176840128	0.506024	0.732354123797277	0.309524	0.543801358725896	0.538462	0.76182520546922
1700001O22Rik	chr2	-	0.421053	1.35866635394734	0.431818	1.39673531935092	0.529412	2.94831417461778	0.408163	1.54221036838993	0.454545	1.48681252713671	0.547619	1.31144012993647	0.606557	1.83493013569789	0.375	1.40817008425077	0.45098	1.38711234851862	0.380952	1.51879293638518	0.5625	1.23015543710916	0.545455	1.17173939397565
1700007K13Rik	chr2	-	NA	16.2042300047547	NA	13.2418763781632	NA	34.0908449631552	NA	15.723085939619	NA	19.1115566109745	NA	13.8826743994663	NA	22.1598250320426	NA	15.7612797401788	NA	18.9155551861161	0.9	15.4549873285659	NA	18.4837356230513	NA	13.0602081478258
1700017J07Rik	chr2	+	NA	0.23164723641637	NA	0.152458619933849	NA	0.458326784963931	NA	0.18488619373223	NA	0.399748030366402	NA	0.152767010765649	NA	0.289468976309948	NA	0.238853678184018	NA	0.377355917482835	NA	0.264076952274872	0.4	0.317557447446213	NA	0.188704203514603
1700020I14Rik	chr2	+	0.494869	15.9372956016398	0.485122	18.3590170861824	0.495602	6.52723429281148	0.505124	19.5482388180781	0.499868	12.7813155757079	0.469694	19.3391889854146	0.480448	11.0819639335323	0.467965	19.4762909634875	0.479209	13.0711679909835	0.504572	19.4490767739422	0.50388	12.7822862323415	0.491094	22.5001795574077
1700026L06Rik	chr2	-	NA	0.272403682678191	NA	0.212380776309456	0.230769	0.507871480928907	NA	0.23413967773854	0.384615	0.369944964360298	NA	0.174117580944944	NA	0.333257455992712	NA	0.132336768485154	NA	0.207082689567332	NA	0.217377400205915	NA	0.335128676131323	NA	0.0955899204952153
1700029I15Rik	chr2	+	0.545455	0.174177314791664	NA	0.278180431446065	NA	0.268037301295672	NA	0.281123937996905	NA	0.205006593751589	NA	0.203696902930398	NA	0.184676053135427	NA	0.272387104442419	NA	0.176547328357449	NA	0.138993024954764	NA	0.232141247283103	NA	0.211886262937465
1700037H04Rik	chr2	-	0.494462	22.1438950066158	0.455939	22.416205638111	0.419565	55.6907643544804	0.438322	21.1742005219437	0.436766	23.5667054047275	0.406742	21.8483288971546	0.455804	25.3027035499695	0.441176	21.1709801826129	0.420538	23.0386077147413	0.433962	22.358931161822	0.426564	21.6064318403895	0.449038	21.0453064625711
1700057H21Rik	chr2	-	0.996296	4.37917254578067	0.973214	3.70393514316763	0.96904	5.4948800441228	1	3.6594822300778	0.987654	4.54912464443231	0.96875	3.69069317199513	0.982196	4.50026661017877	0.995	3.76862785137616	0.986159	4.26803799544192	0.99308	4.28308568490924	1	3.64557012749139	0.987179	2.71484974341899
1700084E18Rik	chr2	-	NA	0.0547681409701804	NA	0.100927819774263	NA	0.252844144259318	0.6	0.142794072182742	NA	0.193386206002199	NA	0.121358369923838	NA	0.139366449056154	NA	0.0988259182829254	NA	0.141559082457638	NA	0.0611867592009867	NA	0.113871048772263	NA	0.174891425566648
1810024B03Rik	chr2	-	0.58209	0.19841494676549	0.703704	0.158445304896885	0.581818	0.300247079530244	0.5	0.209390124478995	0.69697	0.225340086890183	0.865169	0.223900494933428	0.666667	0.206868392365729	0.586957	0.17105792114735	0.588235	0.244689623939245	0.54902	0.193520053899459	0.736111	0.215081808243324	0.574074	0.196114165759655
2500004C02Rik	chr2	-	NA	1.23938746957484	0.6	1.79358654588409	NA	1.46410538177695	0.5	2.38959879767438	0.0909091	1.54456761086433	0.238095	1.99241766588514	NA	1.34501281214161	0.4375	1.81543257915505	NA	1.61834776895076	0.352941	1.7627966801622	0.4	1.37005504078885	0.210526	2.0786466758828
2600006K01Rik	chr2	-	NA	0.189257816299942	NA	0.194899803320839	NA	0.449715500538044	NA	0.155496389821026	NA	0.237928592972759	NA	0.113064972548175	0.333333	0.336409891387237	NA	0.200885116964865	NA	0.16926443714498	NA	0.124375361163883	NA	0.275980609999041	NA	0.0761795916891101
2810002D19Rik	chr2	+	0.649606	2.06401256441944	0.590786	1.50588759801131	0.759036	1.2929383625833	0.673203	1.2789019088829	0.7471	1.61132220777178	0.716381	1.79938570660849	0.712185	1.58640350742413	0.618794	1.99372570201836	0.573013	1.60990393188069	0.671743	1.904240779926	0.580078	1.79165704295266	0.686275	1.84639662974195
2900093K20Rik	chr2	+	NA	0.414093510298348	NA	0.381549879516987	NA	0.987719818919182	NA	0.616939468326947	NA	0.538691790208855	NA	0.509762229926997	0.7	0.592722189587037	NA	0.348696882040248	0.75	0.587619255866275	NA	0.484653397772895	NA	0.264911239227617	NA	0.440775744505715
3300002I08Rik	chr2	-	0.181818	0.487992673354898	NA	0.442828556435162	NA	0.0597354741385441	0.636364	0.399320409293812	NA	0.302298463282059	NA	0.498336524773461	NA	0.199907247692558	NA	0.480302365625585	NA	0.359732902977181	0.636364	0.430718615262118	0.363636	0.390234151880644	NA	0.590268887894994
4930402H24Rik	chr2	-	0.458065	0.99564256678208	0.530067	1.08653120489079	0.544041	0.503379030854348	0.437158	1.15409180304955	0.491765	0.99748192732453	0.530184	1.07923823415617	0.476309	0.89450503252623	0.476298	1.14074815885022	0.537522	1.1788770210568	0.511321	1.22810771695715	0.496112	1.38804393050406	0.490022	1.7585128562816
4930518I15Rik	chr2	-	0.181818	0.423364724879033	0.0909091	0.520123291807379	NA	0.122157345579229	NA	0.547527984193243	NA	0.404322387992972	NA	0.532033209393755	NA	0.308607421024656	0.173077	0.742716499311873	0.761905	0.46488585757114	0.578313	0.713226016557257	NA	0.329148731684952	NA	0.616953577771711
4930591A17Rik	chr2	+	0.858124	7.60336366182004	0.784431	5.2837151565134	0.831409	7.62338817826199	0.795	6.19000816279125	0.873823	7.91372593295966	0.81713	6.29445686447238	0.87619	7.98847965965813	0.867277	7.01320743891804	0.861035	8.68632019407752	0.819392	6.54201381172884	0.873333	7.55778825482996	0.833333	4.62635111482219
4931422A03Rik	chr2	-	NA	0.0488537287430636	NA	0.063020036279772	0	0.225539501964148	NA	0.0181962483635757	NA	0.0817116760429162	NA	0.0721685853604512	NA	0.0621581322413372	NA	0.0352614824535082	NA	0.0668499434342251	NA	0.0311881144634243	NA	0.0468803597509547	NA	0.0111432070240209
4933406J08Rik	chr2	+	0.387097	0.969507444111282	0.263158	1.30928435252127	NA	0.410002022293975	0.310345	0.875200830865941	0.105263	0.969645222375938	0.314516	1.25043590400603	0.333333	1.01813698097858	0.134752	1.31540334437736	0.219178	0.815790562665414	0.361345	1.1102968748979	0.7	0.692432888066229	0.278481	1.60367345341441
5330411J11Rik	chr2	-	0.945591	2.14113524707161	0.943709	1.97286331524768	0.9399	2.34166730017768	0.955696	2.67707662149015	0.984277	2.40673110904121	0.953198	2.05656584575567	0.920578	2.57456549531049	0.922591	2.1420912982478	0.962437	2.76971889189479	0.961022	2.31490468125432	0.944191	2.68567832587612	0.928962	1.72310981201558
5430405H02Rik	chr2	-	0.315068	0.402394373990776	0.326087	0.441928092079348	NA	0.379985157801503	0.431818	0.586641188153659	0.4	0.389016325258589	0.515152	0.454080203954836	0.347826	0.420184777349419	0.394737	0.502400584263909	0.627451	0.367700727557454	0.48	0.587079203196795	0.5375	0.419293749909668	0.384615	0.449646198984861
9230112E08Rik	chr2	+	0.677419	0.56969977091046	0.598985	1.7727044163621	0.78	0.361098700832635	0.658951	1.93495278876931	0.75	0.442588660571356	0.628627	1.45293641307012	NA	0.41218240570626	0.707434	1.28077446649151	0.762376	0.532486124610325	0.65812	1.4234787648788	0.627119	0.50411771098543	0.50774	2.3485904489094
9830144P21Rik	chr2	-	0.625	0.278541198193321	NA	0.100300246503422	NA	0.121940798842674	0.4	0.101361552042058	0.352941	0.297498022819372	0.454545	0.118238979083087	0.1875	0.183308641983146	NA	0.118431411869059	0.446809	0.233653473799149	0.3	0.158402959754815	0.416667	0.194578903674856	NA	0.0876322404703528
A330069E16Rik	chr2	+	0.241379	0.511757954891826	0.27907	0.829258013227563	0.272727	1.24239973004174	0.222222	0.55868841931637	0.435897	0.688699537876935	0.6	0.43990698861062	0.302326	0.771808488131937	0.351351	0.700538719048164	0.238095	0.389041046231646	0.25	0.647777489018789	0.404255	0.762030469999171	NA	0.684270800658816
A430018G15Rik	chr2	+	NA	0.0822385360207228	NA	0.109453362985784	0.545455	0.221471101140627	NA	0.0680686278539364	NA	0.0849076376861592	NA	0.0674921621409474	NA	0.0871955585381981	NA	0.0824414694841216	NA	0.118089859213056	NA	0.0437507525134901	NA	0.0803780598882393	NA	0.0729479997474432
A430105I19Rik	chr2	-	NA	0.268575903854522	NA	0.199181971002088	0.148148	0.211692820675954	NA	0.274485780399701	0.363636	0.322606382836941	0.75	0.211680925986634	0.455446	0.367242185262025	NA	0.292550773915123	NA	0.263930682719598	NA	0.216936536291257	1	0.301205575675469	NA	0.149415506612107
A730036I17Rik	chr2	+	0.280645	1.12609602081134	0.4375	0.522788791752135	0.415584	1.09474028486577	0.155556	0.604947216625241	0.337662	1.16711585980502	0.23	0.679800516638949	0.335593	1.08490793694473	0.445652	0.707283479190934	0.272206	1.08325024554374	0.270408	0.711984783501908	0.37037	1.09446311923286	0.291667	0.577923593065946
A930004D18Rik	chr2	-	0.885271	3.35481939462314	0.873656	3.6291289605923	0.874552	3.21417826480293	0.88	3.38275690714971	0.896296	3.30247728935322	0.897397	3.32416131223221	0.868508	3.76215407546941	0.848175	3.28180746662658	0.88342	3.40633906558894	0.871379	3.61265557318579	0.881988	3.38679373383762	0.91358	3.36629752653366
A930012O16Rik	chr2	-	0.302326	0.548505952771569	0.0571429	0.505398841057803	0.140127	1.24267728447553	0	0.406705634254794	0.144578	0.689008123622098	0.474576	0.515799323175646	0.161017	0.872351671631019	0.173913	0.494873511370553	0.308411	0.803066938906149	0.301587	0.47823462083938	0.142857	0.657937404499609	NA	0.289607684173937
AA467197	chr2	+	0.722963	2.90154599809551	0.629647	9.74693430373096	0.673984	5.12087157988274	0.633601	8.12963907250157	0.714286	3.85681827852774	0.638466	7.58026605721493	0.67962	4.37668429767386	0.669956	8.41698620874957	0.664186	3.79827708530021	0.64738	8.47258961892167	0.695616	4.12032767846047	0.626919	11.0254391652483
Aar2	chr2	+	0.492105	12.357650014716	0.49481	9.92624967883994	0.472	16.8563357355514	0.478788	10.942483835423	0.507508	12.2674202615114	0.459807	10.6779111680297	0.448179	12.925770703708	0.486111	11.2001149136322	0.42446	12.6366179934247	0.512064	10.8737684604887	0.527981	12.6417072341207	0.445	9.23434329464462
Abca2	chr2	+	0.446914	2.70631394160407	0.484709	3.62033507175051	0.419689	1.20567969779318	0.459807	3.86820713999299	0.520455	2.56353005412474	0.486971	3.68826349571731	0.54955	2.32508168762162	0.449695	3.7953687766426	0.44691	3.1124071315613	0.505495	3.62782120518402	0.478652	2.48661381939985	0.45098	3.20196168533007
Abhd12	chr2	-	0.352005	11.4221159971349	0.322176	11.6228770418219	0.333455	15.3139404388369	0.369848	11.3018426220197	0.337131	12.5147090603143	0.377448	11.0371919500304	0.356374	13.2143664350122	0.355612	10.7254862420541	0.365428	12.0763250631073	0.350166	10.8935344287937	0.351153	11.364227653253	0.347992	9.96593489915366
Abi1	chr2	-	0.472192	21.8214339505033	0.482729	23.6656312770411	0.582781	7.06140015703109	0.475964	24.1112475805121	0.474035	21.0414456180017	0.470644	23.8461195635459	0.496325	18.6954457298911	0.482135	23.4774964317433	0.476854	20.4961727611169	0.475042	23.6433754163527	0.492893	21.3677819484807	0.464386	25.4710331732951
Abo	chr2	-	1	0.57882508486391	0.786517	0.555870480721311	0.703448	0.668055052927243	0.722222	0.523796068128367	0.695652	0.63632967718421	0.542636	0.549467928617404	0.761628	0.65477279380943	0.636364	0.404542867054506	0.64433	0.669335058635179	NA	0.416361328086714	0.5	0.515024702201504	0.909091	0.61364248180405
Abtb2	chr2	+	0.350267	1.45576660488805	0.418685	1.77652204678156	0.34507	0.919458592664088	0.391919	1.74699369049387	0.319693	1.32136666577092	0.304498	1.70344840920159	0.336714	1.40319510399584	0.362745	1.82146718438431	0.38118	1.50516548699865	0.372907	1.63383167039332	0.351562	1.58953331183434	0.364341	1.41165885613953
Acbd5	chr2	+	0.544044	7.9281063520077	0.560887	7.39183543909123	0.629696	1.78743584451418	0.539479	7.47355927312167	0.531478	7.30035010346834	0.541053	7.63988041494297	0.475288	6.81387949964838	0.502083	8.18640219645959	0.519873	6.8433807524932	0.562958	8.03455080872196	0.548012	7.30412707599805	0.536392	9.24801415217624
Acbd7	chr2	+	0.563636	1.91605980188897	0.484848	1.24941418174037	0.55102	2.38154423260448	0.375	1.2900831678786	0.3	1.83520423444034	0.512195	1.27915759560495	0.627907	1.66431032895343	0.64	1.22339414546324	0.432432	1.50141699698036	0.394737	1.12911546599787	0.466667	1.98009926270134	0.375	1.27750258153351
Accs	chr2	-	0.251309	1.49902444836338	0.312736	1.05186240099267	0.376238	1.43851812475856	0.348279	1.34703798278578	0.28181	1.55637100793842	0.291667	1.16111695298723	0.304734	1.56854530659009	0.25573	1.33218968402141	0.32069	1.56210190633174	0.295411	1.29926239395782	0.319579	1.47858098766892	0.344538	1.0863667605348
Accsl	chr2	-	0.69002	7.71180787975831	0.804656	4.63417597328379	0.669578	9.86164829350408	0.736555	6.39518549814583	0.728327	8.37578227611061	0.709901	5.23689239796745	0.686709	8.38106213523177	0.715709	5.97459304224084	0.739535	8.48371367111398	0.754889	6.12278582787996	0.718613	9.62128585619281	0.824937	4.68432416086179
Acot8	chr2	-	0.486755	5.65194030906712	0.571839	5.41751078177575	0.533613	10.4099827027684	0.56044	5.38712069719568	0.512821	5.88643701948883	0.501529	4.6747164974361	0.619608	6.80411781326343	0.543956	5.34009863934957	0.514451	6.06302837020699	0.568878	5.47492177654646	0.529817	6.66655643371224	0.524528	5.14772575234545
Acp2	chr2	+	0.472131	2.98506644961348	0.56168	3.02023289511684	0.454918	1.86370170602017	0.493639	3.4821956285574	0.463612	2.99531748215629	0.501393	3.14059634384324	0.503632	2.81057295876106	0.515971	3.32223543031405	0.461538	3.25360453578329	0.525581	3.26601982772224	0.49676	3.38390138584919	0.470948	3.36650336755242
Acss1	chr2	-	0.629615	6.27171104071344	0.615141	6.36228878311444	0.640805	4.09629564061513	0.647582	7.26641259324691	0.621467	6.16598524403304	0.626966	5.4509179028818	0.637165	5.67781335824618	0.645724	5.76110095661555	0.611476	5.79686822960958	0.648395	5.9821682095017	0.601764	6.75884640098412	0.65537	7.78404839497738
Actr5	chr2	+	0.52178	2.62873207992406	0.543165	2.70122001659384	0.53316	3.7805937787911	0.479735	2.78203075882467	0.482263	2.63722189602247	0.442413	2.60656431197203	0.547414	2.80105837420229	0.509158	2.7765384910952	0.510204	2.51005088612778	0.552394	2.78999886594179	0.504078	2.49683272925862	0.57223	2.39241407143863
Acvr1	chr2	-	0.622449	2.28518905693532	0.571848	4.03497886460915	0.666667	1.04002247294207	0.559838	3.18124983763558	0.534722	2.4908778180935	0.553977	3.65708216295753	0.615694	2.21672452763344	0.513761	3.62925650026587	0.569892	2.2965703491332	0.577181	3.50488465245909	0.588727	2.1514095101282	0.571168	3.92590713334755
Acvr2a	chr2	+	0.512111	4.52018824477555	0.534527	5.97094022850456	0.214286	1.01035826347703	0.543307	5.71626533845758	0.51495	4.0467254883892	0.507353	5.79747850461478	0.506667	3.43687136663465	0.517815	5.85652541997215	0.471033	4.31731184105796	0.465696	5.59297893761225	0.44127	4.10117401119937	0.604317	6.66210134691622
Ada	chr2	-	0.405405	6.2626575854702	0.390393	5.64080140060743	0.366272	11.7400070197972	0.419563	5.90433721064474	0.377331	6.56762698072813	0.389194	5.47174499878632	0.397276	6.88884111254305	0.44767	5.86897609252157	0.426911	6.27060483392265	0.378547	5.78372054649926	0.371695	5.53951631538729	0.382514	4.93098599491621
Adal	chr2	+	0.495946	5.26958719086079	0.533145	4.42144334710545	0.55122	2.66381791614545	0.518072	5.09049031448923	0.527273	5.23575594026955	0.520997	4.914196100606	0.51986	4.71948215504172	0.530612	5.09164996732777	0.494297	5.42484084887192	0.494092	5.10252099645106	0.54828	5.04731393242703	0.528671	5.23086490550425
Adgrd2-ps	chr2	+	NA	0.158761771829637	NA	0.341330910248593	NA	0.128943864778076	NA	0.219011193677297	NA	0.103812505025223	0.480392	0.293161156196559	NA	0.135600230450228	0.576923	0.419104310325985	NA	0.0804610138103897	NA	0.370689837552785	NA	0.173978615319189	0.813953	0.637071629220788
Adnp	chr2	-	0.536549	0.292574480173412	0.48584	0.549945314192784	0.529801	0.0101303069760719	0.487877	0.569386120055672	0.514844	0.28001904085436	0.504708	0.464617305714023	0.518189	0.204738431094737	0.531174	0.459302229483669	0.51146	0.364763280136804	0.505118	0.511307275799946	0.485813	0.294794217334882	0.502283	0.680689570300227
Adrm1	chr2	+	0.514286	22.3043567448063	0.405941	23.4379148269038	NA	46.0661523064361	0.440678	22.6983235524242	0.454545	24.1486694376776	0.402778	23.2421382269932	0.452381	26.5196966925485	0.474747	22.3477774098518	0.370968	24.1910401766743	0.410714	22.2828511529109	0.310345	24.1045304256748	0.627119	18.2118905240819
Agpat2	chr2	-	0.487136	16.0348671793444	0.484277	19.9140017821256	0.478261	23.1376845468505	0.505263	17.5039195561199	0.48378	17.9520935889179	0.443515	18.0952309087107	0.484392	20.1141527266339	0.454424	18.5511652469103	0.493179	20.6198493598118	0.503472	19.9208370635291	0.478261	21.231982873856	0.479606	23.550461785668
Agps	chr2	+	0.536293	16.5532529146877	0.538297	16.7281170964467	0.558036	5.63774540659644	0.538505	16.1501390479313	0.528743	14.2420823316283	0.559871	16.6775847811034	0.552703	12.4009234583104	0.521141	17.1907081680417	0.546536	14.7891716171849	0.546716	16.7295846655286	0.550941	14.2695236190046	0.551687	19.9149134409914
Ahcy	chr2	-	0.695522	47.2539598391452	0.624691	41.7663677631954	0.763185	56.2645555941603	0.631868	41.1275108534613	0.679916	50.8156319747818	0.692935	41.9693513701725	0.784708	53.4185326499907	0.672131	42.0243142291597	0.687259	50.2018527796472	0.62201	42.7004147061337	0.694175	50.3047318685065	0.658621	40.6159527479988
Alkbh3	chr2	-	0.53411	3.23063723248147	0.466555	3.05892125629858	0.488024	4.44351372630391	0.485926	3.19279357326467	0.412773	3.21373392791265	0.564019	3.21150204854008	0.443801	3.3413095131896	0.521031	3.25897470522232	0.491071	3.1151354141116	0.503659	3.23045778771933	0.464968	3.07478173394106	0.484112	3.38493167896056
Ambra1	chr2	+	0.565022	11.9377030813847	0.605191	11.4165058918762	0.812121	6.73111628206726	0.60084	12.1610741178629	0.604134	11.2233029169485	0.624813	11.5835972696566	0.583333	11.0422343097993	0.527349	12.034570591467	0.573598	12.3074655088111	0.579268	11.6033005855724	0.60981	11.9118537353348	0.580135	10.0395999636546
Anapc1	chr2	-	0.559271	11.2211958266677	0.585041	10.3324182198945	0.565361	3.5625579572666	0.592152	11.0094433473558	0.57957	9.9752092713552	0.596863	10.9680845809375	0.561332	8.57464814580639	0.5781	11.2781765136811	0.565884	11.1446383022883	0.581467	11.0425182191144	0.560708	10.3242871098252	0.594634	10.4156410761636
Anapc2	chr2	+	0.489826	24.0038889298849	0.443925	19.1114956632258	0.475248	29.628819943804	0.481077	22.0256792027869	0.442991	24.6140710295431	0.469907	19.5738486250206	0.502362	26.5491366127131	0.486091	20.6524711508302	0.492196	24.9107921580489	0.472169	21.0404480715867	0.494692	25.132213852567	0.475904	16.9964150653524
Ankrd16	chr2	+	0.474114	4.88124429729749	0.45921	5.96519691655652	0.419114	2.88697793784	0.489453	6.74158105440657	0.464663	4.50379425344207	0.46	5.89434728838106	0.444825	3.89630322230223	0.445423	6.36048179475187	0.467326	4.87537562490333	0.488758	6.40772074274525	0.467776	4.48003305593721	0.490429	6.30493033186697
Ano3	chr2	-	0.590909	0.526962389788646	0.568182	0.523513076584156	NA	0.107623400750224	0.636364	0.591650334883994	0.625	0.441297389235932	0.9	0.506552380474215	0.333333	0.372483770014796	0.583893	0.796307156429818	0.561798	0.441813480408184	0.603306	0.645481194415397	0.56338	0.452611752558157	0.491228	0.769159170119387
Ap4e1	chr2	+	0.467554	2.84653197611327	0.438907	2.85805362961495	0.454545	0.267026355307095	0.444623	3.08738583931781	0.481685	2.52493243685967	0.510949	3.04798061395845	0.476109	2.06818354225936	0.458213	3.14403023549684	0.48289	2.72676898731341	0.445013	3.19210351533148	0.485407	2.51234285110613	0.496255	3.35555699808112
Ap5s1	chr2	+	0.414201	3.86603688108663	0.402439	3.10172470128309	0.425659	7.69425293607294	0.466431	2.88869827409924	0.463351	4.12683343137711	0.451852	3.25599876367046	0.494526	4.8513954156139	0.471471	3.4199602027092	0.492424	4.48732258854749	0.446914	3.49141547407654	0.513619	4.53177752298581	0.478049	2.98957476348786
Api5	chr2	-	0.545038	82.1140051037283	0.531001	78.2500625977018	0.455823	47.2610210640557	0.512661	74.6878526148581	0.519435	80.3845489797399	0.523889	78.3256732293939	0.539038	73.9408216347346	0.529996	76.5489776965266	0.53814	77.2445874879739	0.520953	77.0996745752124	0.532971	72.5355824724339	0.517364	75.5336882012917
Apip	chr2	+	0.610544	11.2386635069013	0.668254	10.5429099608375	0.612591	19.5832340923438	0.615873	10.6253171106944	0.635277	11.7230107385251	0.60503	11.1134028389729	0.572893	12.7085564669357	0.631912	10.2809788700747	0.584158	11.4114190441091	0.609756	10.3673970693592	0.652284	10.6770488136397	0.575049	10.7465534267938
Apmap	chr2	-	0.494557	9.88933073037553	0.483395	11.7554763579587	0.520202	8.58642260290643	0.493506	11.3215888201716	0.525956	10.5850274378395	0.486486	11.434031902226	0.494033	10.2735257934847	0.539355	11.2314719968693	0.488998	9.97815251240142	0.531017	10.2118274660477	0.522533	9.92394271128375	0.459459	10.013851253163
Aqr	chr2	-	0.631615	12.7396420918745	0.644594	9.99501664816741	0.56602	4.73335482710431	0.669378	10.1921418232355	0.649049	11.8451958931668	0.646942	10.6089746198151	0.621222	11.1734534438061	0.626564	11.2774420189101	0.62621	12.9869082147198	0.641737	11.2613306602971	0.632733	12.5774941894685	0.650268	10.6927042965435
Arfgap1	chr2	+	0.499684	9.37939160810819	0.501407	10.2788129923539	0.520219	12.6934615052608	0.50354	11.3462203197463	0.501042	9.86989351563211	0.468651	10.3830787304393	0.489498	10.3436482721673	0.491187	10.0647486005329	0.514618	10.0745991145502	0.490993	10.0261855863475	0.508625	9.39887011284233	0.472588	9.50612104542426
Arfgap2	chr2	+	0.597209	9.03756829722396	0.609202	11.058829140523	0.641346	11.2227068746178	0.547585	11.3099841572473	0.622041	10.081586194381	0.611732	10.8571947434175	0.623543	10.6173210429248	0.589342	10.9413886385792	0.597188	10.0548855825328	0.621591	10.9328881547982	0.620408	9.34610893992629	0.589055	9.47262196090745
Arfgef2	chr2	+	0.431492	9.25064126505423	0.386078	8.39042542122877	0.364641	5.19106038203731	0.381635	9.70737897833616	0.43804	8.32214320276361	0.397156	8.52109999070735	0.435602	8.13536549657592	0.401019	9.50230811713111	0.419925	9.58727282263509	0.380113	9.21217241755371	0.421387	9.18155320321517	0.383017	9.13740180638418
Arfrp1	chr2	-	0.641604	7.00387410980869	0.660759	7.10779731805208	0.60166	12.1650838745875	0.644567	7.82404561668073	0.676399	7.54505188661277	0.648421	7.2091530360457	0.656189	7.78812260359467	0.617073	7.02842152862374	0.665996	6.93298906413475	0.652695	7.1995812981661	0.675105	6.32516976037065	0.537459	6.30998026743963
Arhgap1	chr2	+	0.464026	25.1835109223043	0.509957	22.472243661775	0.533981	20.1321782473244	0.502589	23.18393580976	0.493746	26.469613438894	0.499221	23.1295758064329	0.504639	26.5568657112727	0.517584	23.3883845511627	0.505506	27.9682023928942	0.517735	22.4017003680059	0.49652	26.4834554395209	0.498409	20.7076444768785
Arhgap11a	chr2	-	0.428697	24.9703978370208	0.438441	30.484346956773	0.490426	6.37314483043595	0.430556	31.6652397179243	0.408867	21.0641421807586	0.430165	28.4834091572552	0.424251	18.3672734323119	0.452682	28.1464500188277	0.429763	21.7565974381407	0.429652	28.6338213421075	0.411467	20.7263855769683	0.429179	31.2299369584297
Arhgap21	chr2	-	0.481372	11.9282246337769	0.497628	15.4913284293712	0.311224	2.57803254923906	0.476382	15.2543540605427	0.486899	10.2335170729559	0.501487	15.731545036393	0.480981	8.84767811637904	0.490541	15.048371066321	0.475633	11.0021263392337	0.489467	14.7475712347228	0.489554	10.6700780919911	0.49331	13.867534239367
Arl14ep	chr2	-	0.494676	8.59383156194667	0.505396	8.55636915584023	0.478357	3.37308270176353	0.52555	8.75938216467959	0.467252	8.9271966972556	0.502106	8.8348040544818	0.516684	8.78540794842447	0.509419	8.94699888017555	0.5048	9.06836531748571	0.509529	8.35308751378936	0.485726	7.88294175701627	0.507194	8.71571191239166
Arl5a	chr2	-	0.596205	18.4250252850121	0.656768	22.4031360538224	0.52987	11.3524426420427	0.627718	22.1309070134679	0.621868	17.2363446351352	0.644152	22.8465507629503	0.601557	15.871344753784	0.64868	22.356923966885	0.597723	16.0461121757893	0.65247	21.4715897312827	0.615701	16.1409624650022	0.680197	22.4124565128492
Arl5b	chr2	+	0.622369	6.99629808081346	0.589777	7.61514724436671	0.55814	1.4448413469037	0.614522	9.252760883934	0.606324	5.46471516292999	0.588054	7.81487056316924	0.619131	4.55488927740188	0.585822	7.76938986351443	0.601314	6.01012275298383	0.597861	7.44922640785753	0.612012	6.23812239260309	0.59569	9.25610042644488
Arl6ip6	chr2	+	0.484542	26.348480516542	0.532538	26.8122426433053	0.524625	9.1631868446715	0.515648	28.2984176992409	0.508123	24.9729382743992	0.543464	26.1500386005708	0.529324	24.908146797263	0.519987	27.0480030381264	0.524967	23.6841212838888	0.526893	26.4234636403977	0.507416	24.1727830556033	0.533627	29.9042616094843
Arpc5l	chr2	+	0.42823	13.0219060042856	0.478814	13.5857035423765	0.466535	14.965062419721	0.446188	13.1656329564401	0.442652	14.014369921445	0.457207	12.9416821102351	0.514851	14.7273938089432	0.476298	13.0861334984264	0.408824	12.7934562267071	0.515464	12.8435158452716	0.478339	12.5727121497855	0.463415	12.6841108975835
Arrdc1	chr2	-	0.532828	2.92475401166182	0.489327	3.67172593618694	0.503717	5.57805913672486	0.506718	3.77445287270745	0.522267	3.1175445994318	0.557034	3.35672335631271	0.559719	2.96054107205286	0.517958	3.69653425727806	0.516736	2.69274768166291	0.523052	3.7124169412672	0.52459	2.8724399549079	0.491803	3.41381692159008
Asb6	chr2	-	0.544385	6.71407060674473	0.539883	7.46983327829666	0.556294	7.46344173545994	0.515032	7.86240521266476	0.52035	7.09450848031816	0.513047	7.6177962271079	0.534803	7.07605023244447	0.53958	7.41293412908784	0.52285	7.52155888651998	0.500747	7.38564826876378	0.548125	6.99611149157105	0.527713	5.49097660095633
Ass1	chr2	+	0.267321	110.632543193229	0.241688	106.890835215316	0.333333	125.546984202377	0.261543	106.005259961872	0.281461	113.146029190127	0.262472	103.874264374062	0.270965	121.393383885004	0.264233	106.413939318409	0.272374	124.908039295336	0.254634	113.043652875441	0.240064	147.093556804402	0.208609	120.241943259879
Asxl1	chr2	+	0.519168	23.7888694005458	0.514324	30.0528779656969	0.554259	14.3032397233707	0.491737	30.9556105763597	0.528915	21.1943454907051	0.512392	29.5591784875623	0.517209	20.5022988397342	0.519958	27.6113429084216	0.527243	23.864259842011	0.524894	27.1004812740125	0.531676	23.6337790994085	0.526555	29.7403464525388
Atf2	chr2	-	0.512301	11.7505444485526	0.527233	11.0102795939768	0.467532	4.47726076997301	0.53117	12.6079797923031	0.542688	10.5367640416117	0.536549	11.6803824048313	0.515047	9.65274909190792	0.513665	11.1294231658005	0.523566	10.9487420364509	0.517011	11.0322783561562	0.566108	10.8811393590808	0.52646	12.4395184692081
Atg13	chr2	-	0.639766	13.6925593515864	0.683024	16.1197486598244	0.656233	11.8204695326795	0.625461	16.6740497049686	0.629502	14.1717378654945	0.668459	16.0266304153106	0.619724	15.0289270571252	0.625179	15.3120081388223	0.633639	16.2498316026001	0.654667	15.5792343091787	0.672741	16.2137140912845	0.672557	17.8473307894658
Atp5c1	chr2	-	0.543006	188.825468733282	0.5533	169.737503241163	0.565469	294.3253265337	0.557437	170.677977215453	0.543832	201.376712574726	0.562321	166.755729010987	0.556384	222.868203050367	0.55798	171.198655505468	0.555052	185.929523438999	0.570944	174.492057214203	0.549909	194.814725662936	0.566308	175.482803715903
Atp5e	chr2	-	0.72933	38.1067430504906	0.737405	29.8143423508223	0.754862	141.984578812778	0.733855	31.2918479048263	0.726126	41.1326153842732	0.750142	30.9280815164358	0.721146	51.2346900415929	0.722367	30.2550146039489	0.745404	37.9272925657413	0.733748	31.6254407404362	0.738261	41.514427366522	0.711088	32.5513891362447
Atp5g3	chr2	-	0.547017	186.182138151875	0.537318	160.678579165815	0.53569	370.467245965271	0.529875	160.053149378458	0.550546	199.737579473052	0.543198	163.826361722362	0.549561	227.01096801434	0.525314	160.802982085188	0.545513	186.438576585104	0.539579	157.278057660486	0.553363	186.246447981816	0.545565	138.882556041864
Atp9a	chr2	-	0.427515	10.2270529506079	0.388202	9.81818052652514	0.368032	14.2003779471326	0.399523	9.6609624052116	0.406478	11.0516940674384	0.400449	9.65485958939585	0.404754	11.8897046013968	0.392761	10.4920222215112	0.394336	11.6257892669933	0.421729	10.8252537963259	0.368217	12.8322565524017	0.421574	10.5382798479158
Atrn	chr2	+	0.501558	1.96607259611686	0.546209	2.29202050655759	0.490132	0.677053943301597	0.477024	2.38358730078166	0.510033	1.69034533958252	0.537611	2.45859350119723	0.553997	1.47767688209585	0.500537	2.51479937883297	0.549102	1.94597715411802	0.503299	2.43612987844801	0.496925	1.74374493779899	0.528571	2.3206302323827
Aurka	chr2	-	0.55268	56.5625884899773	0.567239	58.9667776343498	0.519924	82.4912911649122	0.558745	62.1533302959487	0.536918	60.4658654474889	0.538904	55.3403596780036	0.549317	66.0275189511287	0.559403	55.8193307472109	0.541159	60.822249640903	0.540585	58.8071306062579	0.549387	60.7257729280864	0.543502	56.1497968911122
AV099323	chr2	+	1	0.543851802450469	NA	0.454131354969079	1	0.76499766578263	1	0.633016066850125	NA	0.584313896220028	NA	0.674729257755164	0.80597	0.702771586350754	NA	0.628676626088851	1	0.607238465549107	1	0.895109044095216	0.921053	0.543628927405208	0.727273	0.717157929578517
Aven	chr2	+	0.549777	10.4414163014257	0.545784	8.38361445526341	0.5168	19.7888386082672	0.575248	9.34083178968473	0.554128	12.0231354208222	0.520231	9.56515157228644	0.55459	11.7801312916665	0.529322	9.40069641524403	0.548354	11.1783371520116	0.553065	9.26884756166645	0.57166	11.055356246417	0.548571	7.42470480247179
B230118H07Rik	chr2	-	0.689038	1.72986622586094	0.556931	1.44932019750871	0.61625	3.22225956915508	0.609254	1.47824896212695	0.548223	2.0618243012517	0.535032	1.48931629157058	0.551524	2.24623606191366	0.591182	1.61011130808256	0.578053	1.75062997123929	0.514286	1.45032367489287	0.631488	1.69267720005429	0.514512	1.62739666638383
B2m	chr2	+	0.546366	8.57260237052295	0.542729	12.4939839035789	0.427056	9.38997000694853	0.544534	11.1008752153393	0.461039	9.72463958487496	0.549815	10.2338620511908	0.426087	9.30642758836484	0.513011	10.6573525534731	0.433269	9.24270427221291	0.508716	11.4596193439681	0.511218	10.5521693474315	0.559426	14.343406509145
B4galt5	chr2	-	0.504098	27.0471116590024	0.469765	25.8019651880999	0.4322	22.1585964120526	0.474495	27.2692830107118	0.461387	28.7247268522788	0.494284	26.2634222193805	0.465497	28.3095014589252	0.51129	29.0377571344143	0.502545	29.1654137382806	0.500459	28.6668833620706	0.52292	29.2907247157342	0.501529	24.5684900792856
Bahd1	chr2	+	0.500924	6.67858962943018	0.509563	7.43703216059387	0.534268	5.30660984713545	0.498067	7.37509863991616	0.553655	6.95737079048259	0.521108	8.0005236496542	0.514128	7.01620912626731	0.505106	7.69394735831967	0.5425	6.80433238566809	0.509137	7.44790428865235	0.549512	6.89994663669835	0.457609	6.58328438299059
Baz2b	chr2	-	0.325095	6.96566255145424	0.304711	7.86016159773062	0.246154	1.31459780569686	0.308171	8.10974974038289	0.337598	5.88677761539584	0.321067	8.31444088640438	0.34476	5.151672991363	0.31791	8.34786753338378	0.306054	7.29882598716722	0.324236	8.39534293442741	0.331972	7.35281053449751	0.301035	10.2206565848308
Bbs5	chr2	+	0.0833333	3.93719093411276	0.5	3.53928477196126	NA	3.22153429480373	0.75	3.61846352887896	0.636364	4.09273566254384	0.481481	3.23317476175109	0.6875	4.47996158019159	0.588235	3.65618307420238	0.6	4.04429854106491	0.375	3.78045868446833	0.705882	3.96757400468969	NA	3.94994558281901
BC005624	chr2	-	0.490566	11.7634118930089	0.714286	10.5794940800169	0.880952	18.8643508590242	0.646766	10.8291920935638	0.684466	12.8285836661597	0.561111	10.1867278393326	0.645833	13.3920880329591	0.64532	11.0222233932722	0.504717	11.7505488071509	0.681818	10.3468328818134	0.59127	13.1047470999195	0.748031	9.93801482726559
BC029214	chr2	-	0.384615	0.363664697524358	0.6	0.46074087096756	0.5	0.918151007390836	0.617647	0.380958628614764	0.622222	0.513921354550655	0.4	0.279801727365544	0.367647	0.494030789191132	0.6	0.314434797309284	0.333333	0.408930099284481	0.68	0.344616588106622	0.545455	0.333222692615087	0.289474	0.449309640817539
BC029722	chr2	-	0.470588	0.843212333106593	0.346154	0.732292264118176	0.566667	1.45420608913478	0.454545	0.514418644913793	0.613636	0.990659205523405	0.567568	0.680082786749664	0.617978	1.05588962194545	0.547619	0.655830823032355	0.56338	0.847317858884575	0.510638	0.742489551015317	0.468354	0.930059892520488	0.666667	0.68531758170517
BC052040	chr2	+	0.559606	8.69916296711517	0.553492	8.47646088740328	0.532428	6.07729127133163	0.545455	8.50917911029894	0.540465	8.53483998908966	0.605263	8.35736363172048	0.578313	8.3057428553261	0.564696	8.73830858532937	0.568659	7.95383670505083	0.595414	8.13383730380484	0.547481	8.06456451182358	0.516689	7.14631366589336
Bcas1	chr2	-	0.185734	2.83615113310354	0.192269	3.34680393389936	0.197452	3.90027999933047	0.258206	3.07720009710242	0.272727	2.65079170726349	0.169691	3.2770081830401	0.230594	2.61802643421835	0.200966	3.38933369343121	0.272459	1.87866935074174	0.190034	3.50405281942117	0.222222	1.54515182011478	0.236652	3.01227895222005
Bcl2l1	chr2	-	0.476241	12.7959228848891	0.462366	11.5732914174293	0.512342	19.5981089585604	0.474434	14.6991444818822	0.477072	12.8923064619217	0.452632	11.325691807902	0.479511	14.5832147443685	0.460023	10.9842939421329	0.473164	14.1021894410319	0.433858	11.5130353281021	0.484528	14.7770042463313	0.468998	10.5450262583018
Bcl2l11	chr2	+	0.497217	2.83071002227314	0.560575	4.05427517138373	0.5	1.6807931794961	0.501471	2.98075352973048	0.48637	2.68285821585272	0.536184	3.82488334028702	0.508772	2.27115433586315	0.582524	3.44393000982807	0.472308	2.31198060690193	0.52356	3.37901409118574	0.530449	2.20907565423047	0.4875	3.41953921403867
Bend7	chr2	+	0.722772	0.705380747800062	0.5671	1.2311124438664	0.727273	0.443673951610589	0.538462	1.11903022661664	0.55814	0.565279582429463	0.473684	1.06131183578363	0.425	0.52530958004173	0.557522	1.05058030554615	0.514286	0.527722443304799	0.488294	1.17045781071587	0.627907	0.57302688656961	0.611429	1.19605349555252
Bfsp1	chr2	-	0.489362	0.543588694230141	0.2	0.603455457980842	0.298611	0.816358629117762	0.35	0.798891438091365	0.304688	0.626820865510805	0.360656	0.586535834388178	0.450549	0.598922212490667	0.302083	0.561343620773997	0.404762	0.592475105365588	0.407186	0.668965481110035	0.493151	0.466116313289513	0.272727	0.328645345903424
Birc7	chr2	+	0.634783	1.79822539511283	0.75	2.8619229605128	0.597087	2.92447591293565	0.797665	3.05394097616903	0.714286	1.7658682574601	0.737805	2.4526484313263	0.685315	1.86057507162145	0.704225	2.57186711397766	0.714286	1.56896642697193	0.721569	2.79657837207069	0.773585	1.38896836102861	0.717949	2.81987145685412
Blcap	chr2	-	0.363014	7.6797676277001	0.4375	8.03361233339891	0.412174	9.65919055294876	0.329193	8.53532611951936	0.441441	8.71820351107646	0.49697	8.22083312753958	0.420074	8.75760182912349	0.487952	7.59249359520958	0.406699	8.54418287869641	0.395604	8.06178424280947	0.486275	8.24735372569088	0.44186	7.90789056705389
Bloc1s6	chr2	+	0.504307	3.62112508072028	0.530709	3.92099014426434	0.57219	3.74380533437323	0.555195	3.95126469627082	0.566578	3.77512553877065	0.515469	3.94374757845855	0.560367	3.98411468189204	0.575472	4.13633739195781	0.529384	3.80569749790234	0.537434	3.91159667807549	0.507588	3.63408757439537	0.590164	4.33580213308539
Blvra	chr2	+	0.664368	3.80119558684827	0.609672	4.89400896155599	0.775862	3.44179181276164	0.64	4.18306902998174	0.65942	3.54994806474919	0.645299	4.1890013433635	0.682119	4.12700392921375	0.549565	4.68238897753596	0.658627	3.83832369410852	0.619122	4.40702975640435	0.685106	3.22905248150515	0.595285	4.70734439323407
Bmf	chr2	-	0.533101	1.59715701379265	0.532143	1.15040230378183	0.521552	0.952637123116301	0.524691	1.50385601695402	0.466667	1.56162166025137	0.465517	1.13347131124944	0.526559	1.55915385793141	0.512456	1.17483566853024	0.49884	1.48599546829004	0.476584	1.44335423271637	0.482659	1.65845631319996	0.492147	1.25738140708512
Bmi1	chr2	+	0.561224	6.26266939002298	0.548571	9.70457812831264	NA	1.37743114607963	0.565517	8.69597060918481	0.469027	6.33538958203101	0.533333	9.58238186727831	0.563492	6.27682954871185	0.580357	9.72635287590297	0.594771	6.45268490234887	0.566138	8.75364593901484	0.576	5.34825394535766	0.483333	9.37491410184419
Bmp7	chr2	-	0.618497	2.26670604358287	0.557491	3.63884091614394	0.549618	2.54421353191037	0.453403	3.7462494083649	0.524715	2.12072194692324	0.572046	2.95579648607857	0.516014	2.15556793306896	0.59279	3.20464494526962	0.546248	1.99259072499616	0.563867	3.28820814965721	0.575862	2.12718320093154	0.573333	3.60670593028488
Bpifb1	chr2	+	0.0945946	0.532288185452347	0.333333	0.167472653779698	0.105611	1.14377896891849	0.220339	0.322370913778803	0.0481928	0.426247139501726	0.272727	0.215757533258291	0.048951	0.523076922632519	0.272727	0.203028928276683	0.0594595	0.559269916593766	0.122449	0.224469059930631	0.123894	0.356443675286427	NA	0.0740313145665529
Bpifb4	chr2	+	NA	0.110124772358205	NA	0.0922455097265246	0.25	0.17331993067472	NA	0.0978826650859312	NA	0.13023696622894	NA	0.0831888922071463	NA	0.123396912510765	NA	0.14000285749969	NA	0.0646907351557292	NA	0.127824392377117	NA	0.080057921672561	NA	0.0970496002853165
Bpifb5	chr2	+	0.485437	1.52989465503018	0.676692	1.62991955251209	0.71134	2.08577884317962	0.586387	2.39506868579798	0.711409	1.67037234398298	0.774648	1.50079356575025	0.617284	1.67280178124136	0.694656	1.60460208455051	0.668508	1.75908867646468	0.638037	1.86179897470663	0.644172	1.79688953730828	0.754237	1.73388845860999
Brd3	chr2	-	0.487511	16.4016591543725	0.513201	19.113464517926	0.506202	8.17833104558849	0.494742	19.2203429446639	0.521561	15.4666079193458	0.511054	19.2525958072137	0.486111	14.4153656185061	0.493324	18.956043756371	0.519546	15.5780780398213	0.508373	17.8559756583099	0.491707	14.8802134463763	0.513728	17.6178113146082
Btbd18	chr2	+	0.352941	0.773963011064023	0.105263	0.959046602530166	NA	0.703325613158276	0.444444	1.02303868996543	0.272727	0.686108725125344	0.304348	0.891171284569306	0.333333	0.693277786967958	0.388889	0.947099971168141	0	0.676288146137657	0.545455	0.993871882900938	0.166667	0.825222223476311	0.416667	0.902970259204802
Btbd3	chr2	+	0.487745	6.38466809694216	0.528908	6.67693792969433	NA	1.56698801381085	0.540793	6.10916671535	0.539936	5.83449094592724	0.541667	6.465260702982	0.514286	5.32064626175525	0.513742	6.35940164518018	0.495283	5.65710702065928	0.472574	6.04214101804508	0.524631	5.82294487807612	0.467532	6.5644756048945
Bub1	chr2	-	0.496223	41.9323604537744	0.564005	44.7086898854344	0.472564	16.0823858245302	0.528874	42.8920470271655	0.488306	40.0663463384601	0.527913	45.3102813713351	0.487064	37.5959301379058	0.522727	45.7269430504452	0.492415	37.3677058407341	0.530829	44.1511311845742	0.482557	36.915828383798	0.530761	51.4960509221789
Bub1b	chr2	+	0.499321	56.8441417663238	0.518226	48.2574648458234	0.501648	30.8532815666909	0.508201	51.0967126442461	0.498869	55.9740463106278	0.512478	51.0392188724822	0.502303	54.7034747268272	0.514967	53.2184851863321	0.500521	58.3886327225061	0.501111	52.8705840823094	0.4977	58.5007672395387	0.50836	48.4264071382052
C230014O12Rik	chr2	-	NA	0.201205225076409	NA	0.190146149581307	0.545455	0.184587059105859	0.25	0.182550233253302	NA	0.24928255552183	NA	0.190530774138831	NA	0.213333101855321	NA	0.200150171414994	0.384615	0.211786966476523	0.214286	0.2881868124529	0.25	0.140270239228466	NA	0.182397477662138
C330006A16Rik	chr2	-	0.483455	12.154036440164	0.504881	9.54922693225938	0.484556	16.8215590077096	0.496803	10.0611696036368	0.470336	13.1095409243497	0.523351	10.0516263271161	0.503405	13.7354952834628	0.467955	10.6983096344209	0.495665	13.0350658933204	0.48986	10.6144470672127	0.487397	11.4937123648776	0.524535	7.9515376253099
C8g	chr2	-	0.6	0.608076766227795	NA	0.4540264674815	0.706349	1.45203328391118	0.454545	0.556454193928852	0.487179	0.613740612957309	0.382979	0.474304220832611	0.734043	0.80035360630105	NA	0.425653092778534	0.463415	0.820915514349018	0.657143	0.627470186332959	0.609756	0.729393085502295	NA	0.382615783576294
Cables2	chr2	-	0.531306	3.08151509545273	0.516835	3.29112293508451	0.582781	2.46404236356207	0.559014	3.86177668826952	0.625978	3.16078609034227	0.584683	3.47697317719904	0.517422	2.77265563734602	0.570613	3.27173553722014	0.571207	2.82145443226199	0.504011	3.26332361343579	0.566387	2.73921217964454	0.590504	2.49306289599589
Cacfd1	chr2	+	0.649073	3.11520438947054	0.581325	3.98288317444743	0.627996	3.86105076702541	0.584416	3.99707562045205	0.578544	3.17051053427632	0.628386	3.76306195715361	0.59176	3.0050370886095	0.578695	4.00826805850058	0.546416	3.0477192621805	0.561419	3.9843995832888	0.529101	2.60316358581308	0.576857	3.15338274747648
Cacna1b	chr2	-	0	0.34951791400318	0.0869565	0.384428197859753	0.0704225	0.30345747897041	0.037234	0.592273059288528	0.0943396	0.292590592147235	0.0377358	0.424453197724971	0.105263	0.262915394898294	0.0588235	0.383524482509566	0.0520833	0.29203648594199	0.0833333	0.407064183162629	0.0961538	0.300902876361665	0	0.40938676571774
Camk1d	chr2	-	0.667524	5.57234825884609	0.63655	5.57911511856969	0.713911	1.23811074197254	0.627398	7.11195724515259	0.641425	4.40629140368762	0.628708	5.4600291324782	0.661264	3.76917682671418	0.640713	5.66067860808801	0.660007	4.59981976474209	0.661247	5.47094412386999	0.647892	5.19423276651436	0.631401	6.41276185496439
Camsap1	chr2	-	0.494263	9.42007312323157	0.506418	12.4887732002686	0.47541	4.98491083578166	0.491885	12.8316755637266	0.511985	8.2039772638882	0.486835	12.4570434085251	0.499556	8.10672258583131	0.486399	12.1358641000756	0.48069	8.61162760801921	0.519636	11.323555335322	0.508943	8.0849292506207	0.490329	10.9907389753328
Capn3	chr2	+	NA	0.096602583190843	0.3	0.114852362697528	NA	0.111494552523826	NA	0.107362574706608	NA	0.130302712543054	0.1	0.0863135131500918	0.215686	0.101599403789456	0.0416667	0.109648959821336	0.229167	0.111341156036378	0.285714	0.101955889617093	0.203704	0.0722664992139443	0.424242	0.117279869108479
Caprin1	chr2	-	0.478405	115.942665580798	0.500953	96.3020545361354	0.458736	38.9653003855194	0.486748	96.6093384096631	0.495225	113.039719942733	0.496559	100.445312677193	0.495849	102.883092453159	0.497927	102.060325507748	0.494388	116.944670426617	0.480045	99.8998278046594	0.493565	111.657676458107	0.497528	94.5326809143785
Casc4	chr2	+	0.486531	23.3642048690753	0.450277	25.4180218746742	0.497076	18.9168812451949	0.477166	24.3583404668836	0.48795	23.6667589442321	0.452595	25.6174577883545	0.488336	19.9307642377696	0.45048	25.4407352244648	0.484357	22.9860643329637	0.457366	24.0605388842462	0.483979	20.6858346968216	0.451206	24.8969071732287
Casc5	chr2	+	0.475023	12.050150236091	0.48058	8.9453123029199	0.450331	1.81249320884808	0.516204	10.8520533614453	0.473625	9.89453591763038	0.480652	10.2542861885866	0.470395	8.14705045675528	0.504641	10.3974086855093	0.463794	11.290534405657	0.479406	10.1672687222674	0.485035	10.3131632527005	0.504702	12.185860024774
Cass4	chr2	+	NA	0.419636494294468	0.37931	0.319059820509481	0.363636	0.294660128859685	0.268657	0.434468690539302	0.145833	0.455373318719859	0.333333	0.382020631758283	0.289773	0.599722845369561	0.272727	0.315062733969437	0.310714	0.660328050180437	0.301887	0.334868784681666	0.287554	0.645330036504284	0.28	0.428380476100042
Cat	chr2	-	0.528047	63.4136431001501	0.548307	66.8748738081177	0.574763	23.1127754538073	0.53519	64.3361264558022	0.516324	58.3123039587275	0.546547	66.3132770872484	0.542682	54.9190113274887	0.523021	64.3904222852714	0.535989	57.9344686207033	0.550317	65.08812678793	0.536162	65.8331042262985	0.535797	69.4107934746313
Catsper2	chr2	-	0.695652	0.542232757842362	0.690476	0.866526107971516	0.875	0.567150970622484	0.815789	0.796803620493444	NA	0.586510709610344	0.555556	0.903479399041249	0.8	0.528878229788488	0.657895	0.978427408117264	0.681818	0.524921314966335	0.5	0.882302895512577	0.235294	0.579273771353001	0.3	0.961415998063277
Cbfa2t2	chr2	+	0.48115	15.3469182543079	0.460633	15.1245401824655	0.503937	6.02538557221295	0.484173	15.4581316037505	0.4875	13.6181907329874	0.458178	15.6229364683864	0.498682	12.396801725912	0.482553	15.5540376191325	0.476753	14.4703619407238	0.471202	15.6258240389353	0.475029	14.7672320261292	0.455196	15.1107606995918
Ccbl1	chr2	-	0.31	3.07378368513353	0.404609	4.81575210230732	0.306897	4.20894673523454	0.344985	4.34313882725427	0.256071	2.80643126284654	0.350068	4.38546371082714	0.319468	3.40242409137219	0.312925	4.26130732923698	0.302589	2.86999637412279	0.345342	4.35448710215903	0.334333	3.4215284935855	0.417798	5.29496377170764
Ccdc141	chr2	-	0.368343	0.98188614804293	0.317136	1.0548908190664	0.369565	0.266737948328735	0.359173	0.771240152113934	0.255864	0.759694729146634	0.272831	1.24203478133988	0.291045	0.689443605178948	0.35375	1.03533243814451	0.328179	0.705812622876845	0.318608	0.980760660168415	0.358162	0.780913883682861	0.312614	1.19446201583558
Ccdc3	chr2	+	0.43026	1.91115786842865	0.357843	0.858873065870036	0.326531	2.0772188130898	0.387755	0.949844164578651	0.419903	1.92294810954329	0.378601	0.925562107247787	0.42875	2.05588022388223	0.365	0.936192359140643	0.460422	2.15256817858205	0.382759	1.07131173181862	0.386391	2.76594122530633	0.47561	0.688650194084491
Ccdc32	chr2	-	0.505455	3.93085839531993	0.476562	3.00959100087302	0.518433	4.61026579523056	0.454918	3.1862666443471	0.522796	3.91536959712777	0.410774	3.16580994622345	0.553942	4.49762095079595	0.50165	3.41893040439462	0.384615	3.56333749975007	0.487421	3.27785815201058	0.434109	3.96316905759121	0.447761	3.34613293847326
Ccdc34	chr2	+	0.530201	4.22227625271912	0.508562	4.68437130213948	0.475884	4.4902583096897	0.467949	4.44723468639638	0.455326	4.60869801486093	0.496994	4.32362787230259	0.449358	4.3901029147318	0.49009	4.55020718601971	0.481081	4.18960970590933	0.465116	4.85119992057119	0.505747	3.97957637565687	0.498866	4.61120791450192
Ccdc73	chr2	+	0.475248	1.39583108697764	0.550725	1.14691210393628	0.2875	0.452577071408591	0.353659	1.10210046770966	0.326531	1.10313579654353	0.438202	1.34852085559244	0.527027	1.01843049628883	0.340909	1.3404914726376	0.380435	1.05291349656342	0.367876	1.30334205666308	0.423358	1.05291714906523	0.323171	1.86268527102427
Ccndbp1	chr2	+	0.517483	5.9786317276716	0.540864	6.57310682897616	0.572391	3.83291022859429	0.540103	6.45358876524885	0.546271	6.10884875613322	0.565272	6.9155146447375	0.515634	6.03520702813299	0.56443	6.46064256206799	0.580814	6.08170684582901	0.559585	6.3804462960766	0.539801	6.07631086598509	0.537372	6.85959634786906
Cd40	chr2	+	NA	0.170038515414935	NA	0.199019822651168	0.615385	0.286420599470266	0.363636	0.329503819823916	0.0833333	0.200704604161784	0.454545	0.263067842496384	0.8	0.160797211737646	NA	0.215606469047787	NA	0.171187670767267	NA	0.190699844925213	NA	0.176400085310697	NA	0.1100645245749
Cd44	chr2	-	NA	0.198662217130737	NA	0.146865170566146	NA	0.0479903857632687	NA	0.19359025155404	NA	0.158840938140096	NA	0.110904881841555	NA	0.132260323296281	NA	0.16464812191378	NA	0.191414197537018	0.363636	0.208303556997338	0.5	0.168100959396244	NA	0.147532377293235
Cd59a	chr2	+	0.796791	1.65948374397642	0.775	1.25032905299918	0.859756	2.05496251027588	0.738095	1.97179611270564	0.79798	1.89538602275584	0.699531	1.53215779676346	0.853448	1.68390704882678	0.735931	1.73116160487237	0.797665	1.70177586538081	0.790875	1.60704896925794	0.74812	2.03894618210047	0.7	1.21243753244352
Cd59b	chr2	+	0.571429	1.66159799009254	0.636364	1.65305017801198	0.97561	3.27962194563805	0.794118	1.82750521161041	0.794118	1.64466747333765	0.843373	1.60081025188767	0.711712	1.92452335557453	0.75	1.65121385064597	0.75	1.85811988927099	0.814433	1.47007576609078	0.761194	1.83904438939957	0.83871	1.60662758872333
Cd82	chr2	-	0.217054	0.791752303750479	0.196364	1.29587290194688	0.16185	1.11821059033712	0.168776	1.2465308151017	0.178571	0.658261648468191	0.27027	1.12055237866698	0.282209	0.758013768580028	0.28125	1.09500104072306	0.173913	0.784046391479478	0.262295	1.08073822265437	0.124031	0.691458004952351	0.298805	1.5801920451115
Cdan1	chr2	-	0.464471	3.64558920177553	0.464806	4.96790571259518	0.35	3.02597943151379	0.512965	5.62410332695567	0.394191	3.65877426304974	0.508701	4.7792920556879	0.533769	3.8122919711658	0.401651	4.67154900832644	0.484848	3.8143157725646	0.461538	4.56827230737643	0.462825	3.46874025123396	0.51107	4.42963992882694
Cdc123	chr2	-	0.438543	24.3085206927331	0.459404	21.6109719543621	0.387572	23.2772787602942	0.449878	21.0610093779606	0.453749	24.6751328968754	0.444529	21.784055189202	0.440036	25.0560768281363	0.455058	22.0947756653796	0.439573	23.290033830291	0.461235	21.7859291508266	0.439229	23.4075815773889	0.457245	21.6969728268248
Cdc25b	chr2	+	0.501553	6.23506196716126	0.448494	5.687017329732	0.495522	6.01867406687277	0.484375	6.04823674114263	0.438263	6.566173186395	0.516611	5.56284186653637	0.462905	6.92807655881308	0.478916	5.73904746238855	0.425721	6.78272293562115	0.437984	5.68922909139947	0.460149	7.40682018616733	0.518261	6.67991620847951
Cdca7	chr2	+	0.524834	60.8706596973405	0.504913	58.7803685405792	0.510615	49.6891768092567	0.50464	62.3610776600158	0.488311	59.841221859372	0.49289	57.8296036432693	0.510077	61.9131831931941	0.523452	57.3401094996606	0.493457	57.396793563025	0.495488	57.1216014413531	0.488105	57.4838567354121	0.491079	53.64902937846
Cdh4	chr2	+	0.417026	2.99595542006429	0.455108	4.11988695452989	0.4	1.63554832141583	0.464142	3.83409771792461	0.386458	2.96625657113764	0.451145	4.15610052209786	0.468085	2.5041838683669	0.392569	3.91927223058797	0.426271	3.16133815454473	0.437634	3.9415768553889	0.425778	3.55831426738055	0.427867	3.18555682237336
Cdk5rap1	chr2	-	0.50266	5.08235270196403	0.431319	4.28813620853311	0.552036	4.2665387714162	0.501253	4.9192344014446	0.423168	5.05294154176395	0.502674	4.41464630755197	0.449153	5.14705174533647	0.485222	4.77457825916525	0.468127	5.29473355125634	0.428251	4.76863454678232	0.47093	5.496715354888	0.436709	4.96450316194519
Cdk9	chr2	-	0.421986	26.1999146241258	0.491603	25.6109584970151	0.387681	45.4914349382322	0.430476	24.3425669544492	0.486224	27.4554066869231	0.423358	25.9824515117735	0.48519	29.3511246399863	0.47398	25.6870722970501	0.449925	25.8088914775216	0.391176	25.9758540990469	0.395313	26.1009529287464	0.496032	23.6276733752102
Cdnf	chr2	+	NA	0.211319465429012	NA	0.111263918578531	NA	0.0929127051485864	NA	0.168661850791407	0.2	0.17765920178537	NA	0.209041840189446	NA	0.148037653908431	NA	0.186117381108271	NA	0.168295968169994	NA	0.188707641466495	NA	0.185080224513412	NA	0.160668497032941
Cds2	chr2	+	0.290978	50.5639079929682	0.353173	22.6509667970335	0.292176	50.764161690521	0.337522	29.2781724094223	0.278862	54.0918579724107	0.355177	24.1649251676505	0.282333	55.1972133078826	0.32933	28.4998082029843	0.285914	58.8757305323732	0.323676	27.4675279212756	0.282152	60.6278184605819	0.359702	21.8305720092099
Celf1	chr2	+	0.500423	52.5217263904956	0.502461	57.2702664787236	0.513608	21.990718297116	0.511182	55.1962597834577	0.52591	50.3553089287737	0.521986	58.8610605155108	0.490064	46.6717143574082	0.524771	56.3367373770511	0.5215	52.2210609274535	0.507353	54.5243053891818	0.493661	45.8341217815234	0.487952	58.9502592641914
Celf2	chr2	-	0.713626	0.603516814244283	0.669576	0.952813363939848	0.718954	0.159830340387041	0.679598	0.901517814004707	0.708895	0.502354444137743	0.696429	0.87210817103957	0.753138	0.45731938063061	0.664748	0.88441217178115	0.68932	0.487299000431525	0.699495	0.917847990288515	0.713592	0.495672324789157	0.726351	1.00829750455601
Cenpb	chr2	-	0.576271	17.9817437189756	0.566474	17.088077598322	0.55498	25.7637936757805	0.542857	16.9676031138573	0.559889	20.5310369383755	0.557679	17.1640521376487	0.55193	20.3342772949158	0.55563	17.6946896500084	0.551544	20.6106612133698	0.544084	17.5372823005006	0.576242	18.3631309438238	0.576923	13.5036511755161
Cep152	chr2	-	0.441797	4.78428766594944	0.464305	5.31845340552938	0.448276	1.99198928090513	0.467175	6.12016680700431	0.471808	4.28674638879792	0.467499	5.55470703662623	0.492296	3.77428802034367	0.452535	5.61167419768864	0.446822	4.46429670792581	0.45018	5.65206171795938	0.451241	4.80023023411111	0.485424	5.48417338422281
Cep250	chr2	+	0.508176	7.354808529407	0.518131	7.2801173617956	0.509873	4.55953335900756	0.520719	7.97118296444794	0.517951	6.99681335147392	0.502087	7.47596066384819	0.488063	6.47737414125204	0.473941	7.86368111654402	0.496164	7.38529148536184	0.510078	7.8102368860612	0.512132	6.79007754873924	0.560506	6.94231358431603
Cercam	chr2	+	0.57931	5.76509235082467	0.50289	5.32053994569499	0.52	6.05572562746386	0.50641	5.47593046637714	0.577381	5.35698173402492	0.58125	4.9938239805927	0.545977	5.39021524169234	0.446541	5.64805459554196	0.593583	5.1213024356965	0.490683	5.51620299286034	0.450867	5.4796807612299	0.488095	4.74912086527736
Cers6	chr2	+	0.700493	3.40215495387227	0.66587	3.16890609793771	0.682517	1.37604763228776	0.683767	3.96773757444118	0.698151	2.94171240703911	0.696884	3.32186916119413	0.677894	2.68017286651464	0.686324	3.59778567175961	0.689139	3.13202718642234	0.670945	3.49884257450221	0.696958	3.25231901514167	0.671312	3.51597499228593
Cfap77	chr2	-	NA	0.2982609506341	0.621622	0.621094571405815	0.818182	0.488820770434568	0.615385	0.61100283662906	NA	0.282690013383229	0.583333	0.545245488805109	0.7	0.317820167968354	0.8	0.478993106445912	0.846154	0.385457181463348	0.636364	0.528385374439313	NA	0.357766464943928	0.653846	0.904816519733244
Chac1	chr2	+	0.482206	7.05663909632672	0.498778	4.40518797976241	0.456053	10.4068224821079	0.431604	4.57645094609725	0.499498	10.955154787931	0.474654	4.93496237208465	0.473315	13.5649017169754	0.554545	3.76995220940093	0.497581	11.3468488593445	0.486874	3.87620442274986	0.473366	7.66163113354424	0.579268	2.33366119586502
Chchd5	chr2	+	0.431718	11.8823017820746	0.433544	12.1343466431171	0.427374	25.5660713829243	0.463504	11.8914010824359	0.398329	12.7929162662627	0.426752	13.1212266673415	0.366762	13.6363856610725	0.451505	12.3804555391209	0.41688	12.5607443802811	0.403794	13.127315758148	0.431138	13.0896370773769	0.432927	12.3006294189073
Chd6	chr2	-	0.431659	4.08432012894678	0.438794	5.10338800981688	0.426702	1.19031416472105	0.453504	5.57801023521242	0.460299	3.52932984491782	0.450482	5.42555963325349	0.459296	2.99167468120846	0.443262	5.24636950005839	0.453422	3.99426748911386	0.442804	5.33116083786514	0.475881	3.71912528107334	0.475907	5.12364577256578
Chmp4b	chr2	+	0.500983	49.4524484213782	0.532686	47.2522890701398	0.51822	110.363955496323	0.499231	45.6957887709765	0.514783	57.9275718814081	0.495692	45.7722220929072	0.513052	61.7200124708069	0.478489	46.4633004470743	0.51811	54.4948734248566	0.492799	46.7528376348382	0.510269	51.9454738638793	0.496403	40.4144822926677
Chn1	chr2	-	0.618868	4.80288924880864	0.646288	2.72140117913245	0.544236	4.27595021040144	0.630137	3.49793349202134	0.612313	4.75683902815402	0.609453	3.09479958389239	0.650498	4.60540303700896	0.626582	3.64444483164646	0.656977	4.74260467335407	0.580645	3.42733498984711	0.681305	4.81612339408078	0.650943	3.00067552844859
Chp1	chr2	+	0.464516	17.9342135951168	0.518576	17.6788993931946	0.55414	12.4792314939733	0.477537	18.2950146250564	0.503279	18.0987509212268	0.504687	18.4704964918035	0.486811	18.4235131801362	0.486903	18.4206427751025	0.485199	18.4015598222982	0.539723	17.9455421231087	0.506024	17.6254744714543	0.494226	17.2902127534323
Chrm4	chr2	+	0.458333	1.28265464814913	NA	0.731144956624427	NA	0.363823409105916	NA	0.516204820764188	0.266667	1.31306123863408	NA	0.883163063348522	0.571429	1.12370248442542	NA	0.853217683242231	0.486486	1.29735313834226	NA	0.902116210854548	0.625	1.2690904054248	NA	0.607444072896938
Chrna4	chr2	-	NA	0.105972317689255	NA	0.0603094970849431	NA	0.107919439111877	NA	0.107383953156371	0.818182	0.136121043762453	NA	0.0805753202142673	1	0.171018409540346	NA	0.0956104353981325	NA	0.123210489133251	NA	0.0696422770993309	NA	0.149546667305913	NA	0.103084649924724
Chst1	chr2	+	NA	0.502289247491743	NA	0.290604333608237	NA	0.599943490877692	NA	0.28824079543988	NA	0.580701709669172	NA	0.221090346252106	0.0833333	0.65486955349523	NA	0.358325079529419	0.0833333	0.643804865685578	NA	0.326253279470933	NA	0.621182259371699	NA	0.313065906592025
Chst14	chr2	+	0.642857	0.838806835023487	0.40625	1.12482364959616	0.166667	0.847100470104387	0.357143	0.941459960189119	0.586207	1.12738655041796	0.392857	1.0164634474207	0.411765	1.0600935620461	0.538462	0.959500367757639	0.333333	1.22408963408028	0.254902	0.962213021367861	0.371429	1.27566169349117	0.363636	0.854134815908204
Ciao1	chr2	-	0.473404	14.3748605091395	0.518371	12.5684463721731	0.566714	18.8229257715078	0.535907	13.0296863110111	0.534833	16.0141594436814	0.529412	12.580308384389	0.518209	17.029685330725	0.584591	11.9974850267949	0.526442	16.3917650476729	0.55297	13.0143845842056	0.607217	15.735392017215	0.48267	11.7427373547602
Cir1	chr2	-	NA	6.6396532078607	NA	5.82108149519506	NA	4.55788988399513	NA	6.56091396124619	0.1	6.25711233242593	NA	6.04329658991659	NA	6.15462907971953	NA	5.90549463045086	NA	6.1775357667993	0.583333	6.08528094895967	0.571429	6.49032536107662	0.8	6.94504346150671
Ciz1	chr2	+	0.490909	0.59671048094875	0.6875	0.636980761202	0.5	0.858772323326041	0.492308	0.748748972935503	0.446429	0.617016224140895	0.457143	0.561005064964638	0.473684	0.682829189119795	0.6	0.735327316101611	0.490196	0.741285379262268	0.669903	0.827496363352257	0.463918	0.881605761090652	0.518987	0.840286395775801
Ckap2l	chr2	-	0.53324	21.1214618870615	0.513019	22.1327148026148	0.427277	12.9805927950009	0.502687	23.0080858587944	0.508042	19.6494570565631	0.494825	22.9007634921318	0.512537	18.9028685798679	0.522395	22.707203205912	0.494561	19.02293242124	0.503761	21.3184432634007	0.505211	18.8294509137678	0.505625	21.0836794397334
Ckap5	chr2	+	0.517241	29.2144678305476	0.492572	26.6532793388551	0.500984	9.66865105046611	0.486811	27.2634089229896	0.474797	26.3916278106729	0.489088	28.387275082831	0.476562	24.3036769715737	0.482446	28.6981735086377	0.516248	27.2003531942418	0.508319	27.4238751733462	0.497017	24.2708124512423	0.505679	27.3940587945499
Ckmt1	chr2	+	0.614644	14.4361359193578	0.676806	7.18240132574417	0.634731	21.7280744191504	0.619335	8.21606541646168	0.617962	17.4116581998756	0.655844	7.62538737607083	0.65677	18.0074985410956	0.644444	11.1518040694326	0.654504	20.4185331633509	0.6337	11.8302665816946	0.635167	27.3660155785161	0.554987	13.009506694657
Clp1	chr2	-	0.513072	20.7258141207575	0.494877	15.2592249457758	0.573333	18.3091144470977	0.524691	18.5681001396403	0.543478	23.0200017520276	0.525641	16.99920629623	0.518652	23.1241511718979	0.515	17.2299585837477	0.515561	22.2933553128923	0.530461	18.3482583765758	0.492879	22.6777950430454	0.517555	16.2613587448128
Cntrl	chr2	+	0.451273	6.21410803291213	0.439444	5.37911220960482	0.474074	2.01675325231897	0.467606	6.26673331554045	0.442533	5.47030574247991	0.439376	5.75575264143881	0.453674	4.92318748643453	0.465341	6.18141674027616	0.452795	5.88544436272068	0.436484	6.13759238489215	0.437434	5.86314917161918	0.495283	6.12909179749707
Cobll1	chr2	-	0.629902	0.799336487369005	0.553619	1.00795580374822	0.642857	0.145097440085231	0.607096	1.06230142927934	0.508658	0.655574089451006	0.52983	1.00479745225241	0.622829	0.578937952619897	0.59715	1.0580663901515	0.599723	0.701804201174263	0.590102	0.946321119698406	0.585714	0.583689139872142	0.473301	0.915896278501806
Col20a1	chr2	+	0.705882	0.332242639481446	0.691667	1.69920276894744	0.9	0.267129567053268	0.640625	0.799497933704162	NA	0.218534399032974	0.651007	1.05811831148536	NA	0.329509998551725	0.602564	0.831907765201436	0.636364	0.263924150634429	0.565714	1.08136772307759	NA	0.24478859918612	0.666667	2.67366808627674
Col5a1	chr2	+	0.515892	3.70392744296332	0.483074	4.34036582024395	0.541096	2.30236780496221	0.50849	4.59230229239394	0.529481	3.42459505217226	0.498525	4.05296097751268	0.552045	3.50250642277881	0.470962	4.26993501719568	0.564544	3.68611690451097	0.485692	4.39606942870354	0.509485	3.56492833184627	0.477673	3.36001948276388
Col9a3	chr2	+	0.5	0.662184208240914	0.416	1.20905660497656	NA	0.6048474227473	0.581081	1.26724378526864	0.532258	0.577559248728985	0.576923	0.963950718696237	0.535714	0.607336414349759	0.410256	0.927309265981157	0.542857	0.484865953597938	0.580153	1.18003262463195	0.62069	0.753687257828481	0.463087	2.07563849164591
Commd3	chr2	+	0.61039	6.09314607861577	0.536337	11.7175769308111	0.541922	10.4905198228391	0.558352	9.12669932031245	0.571038	6.47331821204194	0.578662	10.1534462835067	0.634989	6.67766415307284	0.583333	9.76433580135493	0.580537	5.40830387864305	0.583578	10.3036026512789	0.608108	5.28617302860465	0.563686	10.3430960647425
Commd7	chr2	-	0.535224	4.60206927420049	0.534938	3.98570630013409	0.553471	8.62997156701791	0.540998	4.23749978480629	0.553262	5.16067323432743	0.520519	4.29632674380062	0.550144	5.40895415937182	0.521973	4.32947838137793	0.567127	4.8307694423414	0.550484	3.95668329257719	0.569125	4.69418086113601	0.529493	3.47083816727657
Commd9	chr2	+	0.473146	10.1029511040655	0.498615	8.31864478892991	0.460137	22.4073495201381	0.464953	9.93515160651233	0.503254	10.5408062095362	0.435484	7.91148117013947	0.478516	10.877673142234	0.542274	8.04843337001325	0.515101	10.1611914020022	0.468889	8.6079195919051	0.50211	9.00884246547513	0.477833	6.13990707023551
Cops2	chr2	-	0.504651	75.5468279776375	0.489146	59.3971566286184	0.466859	27.981749914901	0.525234	57.2904957458937	0.499323	72.4201214057701	0.497705	62.2903806042066	0.491027	67.1564762497786	0.513756	64.582612290303	0.50432	68.5759867468912	0.486135	61.4898458411072	0.528742	65.650177903618	0.520532	64.6755503453386
Coq4	chr2	+	0.581395	5.28204962889125	0.496296	3.89524373027104	0.621622	11.5920336769882	0.455224	4.53679206993208	0.565934	5.93939791993735	0.617284	4.26877500891559	0.526316	6.12653977250997	0.522581	4.31685508908873	0.568182	5.37025912168345	0.517588	4.66706872612645	0.512563	5.37655246781911	0.573171	3.15117699072929
Cox4i2	chr2	+	NA	0.456869159712416	0.296296	1.02495531086492	0.607143	1.14630165655636	NA	0.406921686120471	NA	0.258407990734704	NA	0.531854082911777	NA	0.26853023056164	0.333333	0.896080185446068	NA	0.135905595661965	NA	0.745012021068867	NA	0.270038011306578	0.3125	1.15535824908192
Cpne1	chr2	-	0.563584	0.0347298306839973	0.583502	0.0160002057307989	0.581395	0.0120251036880375	0.589578	0.0323390169496874	0.591894	0.0225899153204956	0.581652	0.00961954241297783	0.589853	0.0220939267474201	0.575683	0.0282005798765632	0.557591	0.0290419767570918	0.602277	0.0138571553612175	0.583333	0.0249952306371298	0.57067	0.0237649225460148
Cpxm1	chr2	-	0.52748	16.9399661604353	0.522982	15.1045744779215	0.570191	28.7773751857688	0.534914	17.194175279866	0.521817	18.7848826695075	0.530612	15.5510912313455	0.537121	20.6105005784568	0.519987	16.1139682690372	0.522327	19.8941253538789	0.524936	15.5159651169815	0.508096	18.7189691063311	0.506555	12.9848510802795
Crat	chr2	-	0.386977	3.27696450065054	0.414685	2.71962635725204	0.363173	4.31860426322175	0.409729	3.12171027465936	0.369019	3.32843140086173	0.411178	2.96116224520177	0.370562	3.60385652020626	0.409222	3.09021933351537	0.316906	3.60203078655111	0.441803	2.98129547839373	0.341508	3.97256233323931	0.407557	2.62072593970171
Crb2	chr2	+	0.476636	0.866999786461925	NA	0.381128340384645	0.484375	0.59337968104094	NA	0.509196120599947	0.46988	1.03580345865928	NA	0.446627972262628	0.484694	0.940320392139722	0.26087	0.468070120397711	0.463087	0.762137261947492	0.419355	0.412134309527458	0.424	0.712003337770285	NA	0.218545274336142
Creb3l1	chr2	-	NA	0.733627980058342	NA	0.687053628610074	0.230769	1.15903736301338	NA	0.593534638324148	NA	0.860499601877994	0.3	0.582956096018128	0.466667	0.86551557534396	NA	0.564237905168469	0.25	0.749705550799808	0.3	0.647815358721165	0.636364	0.923271134180923	0.307692	0.692659693776653
Crls1	chr2	+	0.399649	24.1256607194485	0.446266	22.3404601645141	0.322629	27.8708327150521	0.422602	20.2036563854951	0.425447	26.3159477859522	0.446582	22.2815307834589	0.42999	26.586237809301	0.423077	21.685278213856	0.462396	23.1641796789274	0.462528	21.975958858525	0.452015	21.4208793077032	0.467525	22.4900425083856
Crnkl1	chr2	-	0.515342	21.5652661067674	0.537327	16.1597490933432	0.491106	16.120031058308	0.495702	16.2966149450534	0.504121	21.1624313036497	0.508772	16.602229112536	0.517354	21.74044547311	0.491651	17.3000914437734	0.506545	21.3283318487519	0.464	16.5298913317673	0.483549	21.885310545163	0.508197	16.9504876252751
Cry2	chr2	-	0.472284	2.72189168093608	0.494403	2.58784998346069	0.571744	2.74415910491062	0.485043	2.5322095005171	0.481605	2.72712718793233	0.454887	2.50390448483881	0.508449	2.72183281427136	0.486328	2.51831426193102	0.511724	3.07084523385085	0.505636	2.6543034665528	0.436735	3.20848588713259	0.47929	2.48281584122329
Cse1l	chr2	+	0.524702	94.4210477899755	0.512769	72.5614961672848	0.484157	34.846648622347	0.516938	74.4183526168654	0.513135	88.9368601509597	0.508575	76.5370430369593	0.52101	84.5264781830808	0.52723	78.2226035021535	0.522255	90.2793462907777	0.507934	76.5226797412093	0.520224	85.703734450169	0.514628	71.8220795557357
Csnk2a1	chr2	+	0.569272	42.0519582673566	0.578004	42.5536460972129	0.472666	31.3582468741253	0.559412	40.4379932380675	0.540588	41.303275437262	0.555913	42.3257758348217	0.519464	41.464215636769	0.575332	41.510054409429	0.567568	38.8183070885965	0.558874	41.4951725621757	0.547844	38.7589078051187	0.549003	46.3119511985875
Csrnp3	chr2	+	0.260163	0.680112337342151	0.18617	0.413877695184234	0.196721	0.181594402505569	0.209677	0.447794980704114	0.44385	0.525853318555044	0.146919	0.503749713353199	0.324675	0.478271455508217	0.19375	0.481959807654608	0.198529	0.626024575665415	0.273438	0.414133713977301	0.245059	0.759993108307002	0.273224	0.620805623614992
Csrp2bp	chr2	+	0.5	11.4589077103883	0.4814	9.91073173107072	0.54382	13.5060339772386	0.457418	10.6483601247832	0.493227	11.9075074605668	0.499253	9.94308098599391	0.484344	12.8815850536704	0.507723	10.9425444933169	0.494475	12.1550524941907	0.497382	10.9145325375019	0.49761	12.5996329289377	0.538017	9.74818848611777
Cst3	chr2	-	0.39656	76.3225365220461	0.378378	102.256814345167	0.414395	178.87340152872	0.39298	86.5186334662475	0.405415	91.4499522525174	0.381767	95.5688216245648	0.387493	97.4733045330834	0.389321	85.8934618201037	0.395364	86.7257094755387	0.40365	89.152629397904	0.397741	76.0811582399054	0.401911	86.5215629665294
Cstf1	chr2	+	0.521203	24.3591216497233	0.531718	23.5272541118327	0.545732	31.5685980248776	0.5383	26.7919037110567	0.532292	24.6271622617998	0.54607	24.7791579293178	0.520031	25.732668484229	0.504071	24.4438604103171	0.528476	25.0720483911899	0.508332	23.6056910495738	0.515201	23.8588519923971	0.524609	19.2982791288812
Cstf3	chr2	+	0.491266	11.9811713049412	0.515	9.14812402231202	0.572271	7.08923327872194	0.513033	8.44166333867293	0.489474	11.7614221479211	0.488864	9.69022535108905	0.524233	11.6637927183424	0.479167	9.67104485581026	0.522581	11.7636797211549	0.505703	9.22312225833183	0.501237	11.5653424872663	0.53701	10.9707725766994
Ctdspl2	chr2	+	0.502311	11.4362591897986	0.491391	11.0613170184348	NA	1.35527030488443	0.463146	15.9049392402408	0.492537	8.91610321493992	0.434837	11.3023973565391	0.510823	7.45538284537209	0.493844	11.2263358832798	0.484848	10.3493337787457	0.435088	11.1109200156488	0.48044	10.6660850578077	0.475465	12.6374374884987
Ctnnbl1	chr2	+	0.480454	22.7123784308371	0.510989	17.6909939035018	0.469043	33.6870469343304	0.490222	19.1120948057035	0.498399	25.0512592849325	0.480589	18.6457078271061	0.498667	25.7088045610641	0.476904	18.4189298681844	0.453608	24.3660506208602	0.498853	18.6923917496675	0.506812	24.2335758048818	0.458333	15.6010171277139
Ctnnd1	chr2	-	0.463918	3.90302511380401	0.479112	3.82881316041494	0.455882	4.70463876056397	0.446243	3.89919820890844	0.462379	3.98244779131312	0.482877	3.93528571148131	0.460699	4.08329628653751	0.456389	3.99219577566902	0.44847	4.38643041872196	0.470302	4.07202402848026	0.477612	4.58679387013255	0.45938	4.8000532777816
Ctsa	chr2	+	0.539125	15.8220431662984	0.533949	21.3723445406999	0.549059	24.7325948171376	0.551939	20.8720501017267	0.563107	15.5719058829917	0.557702	18.5987857767626	0.581199	17.391713570517	0.539969	18.9354609489856	0.581846	16.6287213907282	0.568201	19.2223825870447	0.556424	17.4176892400945	0.542453	19.1046136743206
Ctsz	chr2	-	0.64977	15.2508254710241	0.623693	20.5979742174443	0.584197	29.9256485594674	0.615087	18.1962357360612	0.596882	16.2504733659812	0.703774	18.1023076955356	0.575453	17.6817132295475	0.650538	18.5911578083478	0.581651	15.6234951769636	0.646259	19.4773887066797	0.554295	19.0839501384804	0.64876	22.992526830677
Cubn	chr2	-	NA	0.0282975451362902	NA	0.0173824263825483	NA	0.0435464149892077	NA	0.0156145375980975	0.3	0.0350591509931709	NA	0.0203205184859081	0.526316	0.0375040153438065	NA	0.0217483190907593	NA	0.0326662796908587	NA	0.0217450174695438	NA	0.025981167570047	NA	0.0119527403096628
Cwc22	chr2	-	0.546483	14.1888758895474	0.56798	13.4331732515751	0.514286	9.09906093121957	0.530423	12.7121679695666	0.553935	13.934919026933	0.529377	13.4984769480854	0.549464	13.3357279621115	0.534902	13.1596271188448	0.558439	13.7673842608749	0.55384	12.8112586307069	0.539471	13.2106132490817	0.513627	12.9110077246179
Cyct	chr2	-	0.776119	24.0884833080791	0.78169	33.8435325650468	0.747073	32.7940978223104	0.791064	30.0849825310397	0.80897	22.8273730214305	0.750953	31.4408502080355	0.826701	26.3385832826264	0.743557	28.546296501927	0.840445	17.9851863083651	0.841155	28.3570669403791	0.82491	18.1353987706506	0.849673	35.7300893777148
D2Wsu81e	chr2	-	0.570703	19.9689372780152	0.532002	16.6075352674227	0.554484	31.9901183362324	0.527538	18.2068880303929	0.575816	21.3966231462491	0.544715	18.7248707481324	0.565075	23.3146584062213	0.552391	18.4245756009197	0.553612	19.7227765671814	0.542309	17.9478014349672	0.569062	20.6801726757741	0.534576	13.9015690954872
D330023K18Rik	chr2	-	NA	0.375966405667195	NA	0.288682655038873	NA	0.289282851998851	NA	0.42010169560614	NA	0.38428693761096	NA	0.323978589364332	0.565217	0.418559624672351	NA	0.293977435379008	0.666667	0.314392768400831	NA	0.370024879244398	0.272727	0.350758176038969	NA	0.35731420441316
D430041D05Rik	chr2	-	NA	0.11948652434563	NA	0.090078604449465	NA	0.0444491104779384	NA	0.125973232393774	NA	0.0862532183174609	NA	0.0820552854494185	NA	0.0965870554351976	NA	0.086420774783617	0.6	0.128369098369248	NA	0.0858937318051578	NA	0.114502121491276	NA	0.0788340947368432
D630003M21Rik	chr2	-	NA	0.113470059463807	NA	0.0904237332021449	NA	0.123883227616867	NA	0.142782082084876	NA	0.170979760998892	NA	0.0849437258136581	NA	0.16095473251717	0.6	0.135577774766628	NA	0.137550569346832	NA	0.168861275301626	NA	0.129977267013276	NA	0.0734482309369339
Dab2ip	chr2	+	0.51522	14.9829188849791	0.460603	13.3692505536374	0.485995	8.87090049640264	0.470397	14.1605527690669	0.474426	14.3204058630958	0.492629	14.5364037560473	0.498328	13.1479327966763	0.472326	15.7933929176341	0.474525	15.3228604386576	0.476174	14.9110707038083	0.491649	15.578243799796	0.485174	11.7786069139012
Dbndd2	chr2	+	NA	0.0392299115019488	0.367347	0.11172656759062	0.296296	0.0246968067085827	0.583333	0.19925078522521	0.181818	0.0463945082476526	0.363636	0.0790253409073431	0.423729	0.0623918094302144	0.5	0.0836586504416452	0.563636	0.0569344015851295	0.246914	0.108145799503043	0.45	0.0513344745871698	NA	0.0894807902380023
Dcaf17	chr2	+	0.442814	8.71547332280803	0.408264	7.7113619714487	0.369323	3.44328163028722	0.417692	7.9906432789383	0.420511	7.51114124940611	0.426791	7.97307947906468	0.425073	6.78209339570001	0.436303	8.84403180508577	0.414595	7.69704222253575	0.423012	8.5395258316133	0.431869	7.47372661567114	0.457122	8.74002204258245
Dclre1c	chr2	+	0.606952	1.42312862621491	0.671729	1.44287780543491	0.95	0.124109671840812	0.641081	1.66309920785694	0.615278	1.21621988229528	0.657397	1.48147596109929	0.616595	1.04349899435562	0.658593	1.53561750010994	0.5875	1.33988354851067	0.684161	1.52448313665069	0.70396	1.42019410139058	0.710269	1.83764593481427
Ddb2	chr2	-	0.464865	4.05048836257621	0.409266	4.75481435382288	0.464968	2.77324558665127	0.442553	5.26859203029703	0.49569	4.34320255855889	0.502304	4.45807192264445	0.534783	4.14905532710926	0.388393	4.78999401118446	0.527344	3.86639939653459	0.482759	5.1725590430071	0.578475	3.90700506933231	0.517045	5.17404027719949
Ddrgk1	chr2	-	0.470238	12.1075855657944	0.52443	14.8862674154469	0.471731	26.803833022965	0.54023	14.4493055395571	0.45082	13.1976903707742	0.611111	13.487846295512	0.448276	14.9855755504565	0.505929	13.7562927816406	0.444109	12.2190405244554	0.509434	14.1271158872416	0.483193	11.5260223448541	0.537383	13.7740305111277
Ddx27	chr2	+	0.524051	44.8557919142179	0.50901	36.8783443917803	0.494412	42.5858799436812	0.506486	38.7451466050996	0.507895	45.8654066677097	0.529845	38.3180130242459	0.519038	46.9746793387083	0.497762	38.0247543455494	0.510845	46.2755653483277	0.508013	37.7370131262982	0.506519	43.5771289220007	0.513794	31.0519054411754
Ddx31	chr2	+	0.461093	7.55618714768181	0.445398	7.57451006997662	0.518904	8.01046236734108	0.431373	8.45476786231168	0.452893	7.35465200503312	0.514706	8.334093176899	0.448116	7.38940413945266	0.463981	8.28791511056443	0.438474	6.97997397497693	0.404209	7.68748632078611	0.537279	6.70126487075022	0.450593	6.77889147980479
Dennd1a	chr2	-	0.440678	1.12213296130118	0.533784	1.66183075261158	0.52	1.05728697004567	0.528169	1.83804758911618	0.472527	1.06070744640121	0.496	1.56723979011132	0.590476	1.03428940473103	0.543624	1.55083074639153	0.477273	1.08880364074127	0.562914	1.6126403628906	0.490566	1.01888705753569	0.584906	1.4391425727398
Depdc7	chr2	-	0.492208	8.81959907826183	0.492355	6.41309620011052	0.438859	7.11940832664749	0.5184	6.7591075767776	0.492521	8.92388184142741	0.575323	7.33619838187496	0.485331	9.46008368714464	0.510204	7.20934130878537	0.533147	9.00394743846814	0.5053	7.32406591915895	0.514787	9.31015762758309	0.469697	7.36711654074259
Dgkz	chr2	-	0.619048	8.8399256036255	0.604651	8.52013660144	0.692308	9.32386775938027	0.720588	8.6963005211543	0.482759	9.03069103040557	0.569536	8.50279740937633	0.575472	9.53091608873281	0.6	8.3539597746786	0.508772	9.73388485767098	0.460177	8.53441114604538	0.612245	9.99567777669842	0.641026	7.72707296791622
Dhtkd1	chr2	-	0.395812	6.38665189279855	0.440781	5.81868084855062	0.514286	4.11349435382399	0.465052	5.66161054010601	0.430335	6.13664622024753	0.428478	5.48359030505103	0.401004	5.66048287166019	0.404605	5.53917633459861	0.418033	6.2530928298342	0.41221	5.93872079047417	0.445338	5.95909111026643	0.470728	5.64886167307324
Dhx35	chr2	+	0.545348	7.66287649875465	0.53802	7.30335177890771	0.518094	6.48898086988561	0.538934	8.25739767446566	0.555917	7.66901221333697	0.519224	7.40757484116837	0.547907	7.88721774754929	0.564926	7.23593242577311	0.544125	8.18680353686768	0.566388	7.30605409749066	0.54096	7.70876334126879	0.547141	6.72622080987116
Dido1	chr2	-	0.485589	14.2047361619986	0.514791	18.8327079510945	0.510678	3.44697137735827	0.49473	19.1491796139217	0.461739	11.3738575757616	0.493981	19.8373663398098	0.499614	9.57927608136904	0.498	18.5413219101277	0.491337	12.6540055472844	0.512495	18.0008142828262	0.482981	13.3796201476707	0.483698	17.3550605072633
Dlgap4	chr2	+	0.566038	4.79713440364796	0.653938	4.65222670986783	0.587838	7.33231562988237	0.552212	5.23092725720823	0.620172	4.65030420812883	0.60262	4.44103877532406	0.61336	5.12556355638631	0.588346	4.62552541287894	0.550336	4.80139375999361	0.623701	4.63214910267576	0.600666	4.96031484122446	0.554667	4.58167375319279
Dnajc1	chr2	-	0.617063	0.9471442756794	0.609779	1.56963679900446	0.513834	0.548902479958304	0.557752	1.42987278478527	0.474684	0.978716660813753	0.515385	1.4599365376442	0.531418	0.848257642191594	0.532091	1.53209945802115	0.584881	0.927350034985255	0.597109	1.51270921104717	0.550749	0.803601229767545	0.597843	1.45557006006844
Dnajc10	chr2	+	0.504541	18.1270178905603	0.484634	17.1895083130308	0.495954	10.8091023256077	0.471928	16.2616533464605	0.508094	17.4571019352215	0.452068	17.1405257716595	0.495606	17.188232799955	0.450285	17.633024344323	0.495645	16.576728639296	0.485225	17.0588328306032	0.523686	15.8989624852273	0.471698	19.014399697787
Dnajc17	chr2	-	0.538088	12.3378971442241	0.498741	10.0561146227193	0.513595	25.3168608247192	0.526891	10.6416752040971	0.513848	12.2540026956225	0.497051	10.8830143961421	0.530276	13.5415269047626	0.530645	10.5376837563356	0.542957	11.6081758045326	0.554073	10.8196647872075	0.490077	12.8711317981377	0.583333	10.0584822705496
Dnajc24	chr2	-	0.526718	8.89541825292764	0.527337	8.43863472756716	0.570523	10.6494019610036	0.481855	8.60245252804463	0.510129	9.14752961795854	0.552743	8.45570426147752	0.565008	9.01942195286864	0.493433	8.91278400025738	0.550498	8.93533239544795	0.525802	9.12406124368256	0.52356	8.40261103956977	0.534831	8.93222870120511
Dnajc5	chr2	+	0.534115	12.9355117970069	0.514658	18.1417995553661	0.52039	7.4388234559587	0.53086	16.6462854900588	0.538139	12.1285840629995	0.51433	17.737856057829	0.506242	11.466143838689	0.521419	17.5222816129914	0.528447	12.075563031094	0.531949	17.4688518092128	0.519246	11.7879595913059	0.533932	18.0747850242298
Dnlz	chr2	-	0.571429	4.11179518929582	0.679715	4.75806831234702	0.669065	9.67717607532467	0.626984	4.54350212611616	0.59596	4.73350471211299	0.589744	4.70822059585351	0.658602	5.14790197993186	0.597938	4.57664657677825	0.634731	4.55812992224048	0.584615	4.66907250632221	0.623853	4.49000021672364	0.622727	4.89138638694536
Dnmt3b	chr2	+	0.473719	50.5203814491371	0.450882	33.6611732778905	0.449082	33.555666391285	0.441143	36.8176389201161	0.488109	51.4162639949638	0.45573	36.6784856466195	0.488231	50.1348248280429	0.43702	37.4490617321603	0.479936	54.6910568169922	0.456499	36.4793191799594	0.465732	56.057093767234	0.451792	30.909593314843
Dnttip1	chr2	+	0.48227	8.13617641954437	0.428144	10.0251241906077	0.405217	14.1154354335298	0.427807	9.71908616352599	0.40625	8.8008326969654	0.465517	9.77979558796701	0.495845	9.03328728145372	0.493075	9.43699964122969	0.405836	8.82633475582174	0.473214	9.83609489961687	0.411972	8.28768320224995	0.387097	9.04348443752006
Dok5	chr2	+	0	4.50635857287459	0	5.79187537696657	0.0015748	9.04307521775199	0	6.33130639893899	0	5.20745553532779	0	5.63193557777066	0.00863931	5.90677163932919	0.00965251	6.26234355121151	0	5.07469717658044	0	6.5209531531228	0	4.38238557529386	0.0149254	5.15954435544006
Dolk	chr2	-	0.556757	3.27338558140786	0.573134	2.6733879866157	0.539945	4.27601027825545	0.58961	2.97877082883383	0.596491	3.66382106363532	0.662791	2.76808886170506	0.554672	3.47858060694902	0.572207	3.06742216789065	0.532062	3.45554474715754	0.594388	2.8080642802046	0.598131	3.12331484224813	0.473684	2.09567498106603
Dolpp1	chr2	+	0.446339	15.1782626819936	0.462779	11.0946396546739	0.460417	23.8492013022199	0.437727	12.4202480846157	0.489011	15.7323662665419	0.469166	11.9261656649466	0.458832	17.1673099631118	0.481796	12.6108443820702	0.451902	15.3921529516435	0.456585	12.4560679407816	0.440359	14.6309789131442	0.504831	8.88429662939767
Dph6	chr2	-	0.565582	5.6000738391502	0.632375	5.21837842508288	0.573681	2.90485560980531	0.609333	5.48808136701716	0.579835	5.36466332023302	0.582537	5.3791683765644	0.583396	5.38923468369356	0.561351	5.55584716183933	0.596328	5.65164060730195	0.57529	5.49414826612602	0.570096	5.34851929382247	0.573055	5.40820591496805
Dph7	chr2	+	0.564205	5.80441789534733	0.640879	4.73841390754403	0.645854	7.43253269616507	0.630588	5.52809719259368	0.588448	5.79327145546385	0.650042	5.24296380947706	0.650628	6.63147109364609	0.638315	5.23686689418458	0.618154	6.55089872750202	0.631399	5.48223752922634	0.617183	6.07593249447088	0.610151	5.19313968072188
Dpm1	chr2	-	NA	1.18508486698096	0.470588	1.4694128314997	0.416667	0.354608088366572	0.25	1.83527958708617	0.857143	1.05069715310198	0.458333	1.48975271953909	0.277778	0.920781139492	0.652174	1.54252623916563	0.368421	1.35374482861007	0.375	1.63286583067256	NA	1.26691527420974	0.571429	1.98799336656023
Dpp4	chr2	-	0.318644	1.81570731559431	0.27685	2.28926304827969	0.866667	0.874839138604597	0.329854	2.35961772793579	0.39834	1.58129356173193	0.333333	2.5043007349551	0.305882	1.70190717010084	0.334988	2.38238494830252	0.297297	2.12225031691188	0.363458	2.56972492409904	0.291111	2.38495576648519	0.2711	2.94934009007606
Dpp7	chr2	-	0.302283	15.5167055295565	0.34923	12.4603877255243	0.283001	22.5158240852197	0.334641	17.3050411594864	0.297927	16.6193762342798	0.312678	12.3989771178802	0.294164	18.120567077402	0.305996	12.5648433420703	0.290377	17.2980088272993	0.325437	13.2768980886147	0.303536	18.3873565400902	0.332314	11.8064365475057
Dsn1	chr2	-	0.507087	9.49244554501806	0.474391	8.42822524557381	0.491139	2.77934063189666	0.462849	10.4338232108161	0.471264	9.3278482707095	0.487201	8.83737571765077	0.533108	8.59129077125039	0.479705	9.11586593902624	0.514462	9.7848066876874	0.511486	9.02364488331045	0.493943	9.41951385779558	0.505294	8.88312941621692
Dstn	chr2	+	0.363622	279.734272688753	0.394016	249.327332697821	0.366497	280.590507807227	0.365828	257.563753583254	0.361701	285.938786180861	0.379806	249.498922100709	0.355358	299.174896836393	0.379785	252.197346406172	0.361453	265.912703566629	0.377209	256.039339777281	0.351392	284.040887367996	0.396108	250.723207636108
Dtd1	chr2	+	0.329609	3.50573360869073	0.360202	3.78799736738998	0.333996	4.91375139340845	0.341253	3.98293682359588	0.317865	3.80770159573042	0.319249	3.74652491425521	0.313008	3.48605286089886	0.39823	4.06921703524996	0.337004	3.41858053274689	0.352941	3.99728108860131	0.326923	2.93642793945376	0.368421	3.33813164772284
Dtwd1	chr2	+	0.588636	7.03793330103073	0.618705	6.1856866467294	0.565299	7.84185812362545	0.62212	5.46299899203512	0.577966	7.82180479383257	0.578467	6.80838434290497	0.617925	7.45907946584754	0.640074	6.52760563179344	0.595645	6.6019023396576	0.567613	6.88384062436701	0.573059	5.92473986532566	0.60355	6.33394744854712
Duox1	chr2	+	NA	0.0416059019650438	NA	0.0520275533451871	NA	0.0583096904926107	NA	0.044276270937457	NA	0.0497065141525543	NA	0.0411574688202877	NA	0.0874397458342753	NA	0.0321751822045871	0.333333	0.160404326015139	NA	0.0521736237967024	0.6	0.225768051088469	NA	0.0847323792124618
Dusp19	chr2	+	0.428571	0.878896867579756	0.631579	0.809824316472151	0.457143	0.875510877527606	0.380952	0.833007464775176	0.65625	0.821540988878009	0.571429	0.86459388372294	0.44186	0.690584743616448	0.761905	0.892078971783782	0.363636	0.731774514491224	0.533333	0.93096834388373	0.625	0.698645842558596	0.692308	0.984453179364786
Dusp2	chr2	+	0.777778	0.601727693996192	0.777778	0.705648214519584	0.903226	0.838797509726175	0.851852	0.618518007905168	0.775	0.631745888767149	0.8	0.562774447847014	0.806452	0.528212235852652	0.736842	0.479436451891584	0.553191	0.552488249430935	0.791667	0.511357397450483	0.571429	0.512430652215378	0.666667	0.570389780209093
Dut	chr2	+	0.499231	100.49575263369	0.515862	90.3236855321933	0.487644	204.929664840722	0.50147	88.6425859851486	0.498322	115.259031889641	0.492764	91.2319770743566	0.487624	124.228914252646	0.480563	89.1985433634334	0.489414	104.402691119158	0.498144	95.4383090712293	0.49029	106.519627635408	0.507894	90.4422446210782
Dync1i2	chr2	+	0.476096	14.049652682453	0.455206	12.2992603662301	0.488449	8.32157410692633	0.460076	12.1794412783203	0.496855	13.4116689725368	0.475375	12.7674660244949	0.477037	13.5430577688143	0.479592	12.6076663958552	0.508681	13.0087406350309	0.498428	12.7533285059604	0.492832	12.412747253059	0.544794	12.2437440638215
Dynlrb1	chr2	+	0.541642	52.6670309911768	0.519661	47.241471653298	0.474693	160.550305649566	0.510423	48.1024768559131	0.514129	59.5193031197758	0.529313	52.4789353581059	0.500534	65.5665878996602	0.498851	49.1548560097886	0.498158	61.737148454226	0.487831	46.6209146156957	0.514322	56.7423333882373	0.519417	44.2481620900457
E030042O20Rik	chr2	+	NA	0.0987208214460393	NA	0.111176201754144	NA	0.101279406348021	NA	0.142994204028828	NA	0.101924865701745	NA	0.202547431232381	NA	0.130839165886417	NA	0.148446640392047	0.3	0.266837615838365	NA	0.140051462846267	NA	0.166660171700486	NA	0.112587777766176
E130018N17Rik	chr2	-	0.818182	0.992495782437004	0.5	0.815333325427744	0.413793	1.82175268309193	NA	0.734883778448276	0.296296	1.28890961568689	0.272727	0.805942263518271	0.571429	1.44535464412668	0.470588	1.1004330173478	0.333333	1.19083802979317	0.5	0.944685366247167	0.619048	1.31959796438784	0.916667	1.13190807116575
E2f1	chr2	-	0.504254	24.0399007085797	0.515152	25.3561307218263	0.492715	37.4201998297957	0.482524	27.1632834029041	0.469506	25.6814564524965	0.500217	26.1542934745721	0.491349	26.1414164427125	0.503253	25.3474662313915	0.46865	25.1265919284734	0.487064	25.4410764581077	0.483753	22.803742575599	0.479693	21.2530352837882
Ebf4	chr2	+	NA	0.222504881244366	NA	0.539287033045364	0.592593	0.240057387705536	0.654545	0.517968917803083	NA	0.143828710364787	0.833333	0.393002104827525	NA	0.126933398449882	0.818182	0.384040694558542	NA	0.194889482805463	0.909091	0.374416398248559	NA	0.201139343257804	0.642857	0.579233267463088
Echdc3	chr2	-	NA	0.139912712306392	0.1	0.295434711179075	NA	0.188394783987036	0.4	0.211706742133982	NA	0.178761409711765	NA	0.204531415381882	0.515152	0.194704272333619	NA	0.220906292867956	NA	0.199429440189253	0.375	0.237256175781256	0.604651	0.24707782898911	NA	0.192808607792165
Edem2	chr2	-	0.544355	6.24210990640841	0.550955	7.12591501520784	0.455592	9.00938153720933	0.521368	6.91090675431881	0.489097	6.57723542408628	0.44802	6.62702675104459	0.496583	6.68904877021398	0.553476	6.47183628293788	0.5	5.84140712769175	0.520455	6.64398700261965	0.501548	5.72177295197755	0.513514	6.77353820252978
Edf1	chr2	+	0.48965	44.4623238212509	0.554451	44.7242512987174	0.516388	150.629921497777	0.534699	42.5967542301243	0.54585	52.5353339731474	0.565077	40.6009940077391	0.496812	64.5324596207336	0.528981	41.6053364038	0.531865	51.0034105255458	0.518593	45.4867637700201	0.542311	53.3566838909465	0.51284	39.9318727442752
Egfl7	chr2	+	0.535545	1.56920741509373	0.530534	1.52240639444025	0.5375	4.78759080923053	0.513462	1.57921687696704	0.474609	1.59621853837089	0.492268	1.39634423054368	0.482759	2.15157658264225	0.454094	1.47887011895735	0.527967	1.81430111770049	0.60601	1.62196049338444	0.50814	2.21259326497308	0.451613	1.9192392617161
Ehd4	chr2	-	0.499251	12.7815692296771	0.536383	11.9534330584751	0.493333	11.4111111568874	0.531626	13.3202804760266	0.493609	12.5373893115292	0.521011	12.1254840260451	0.542857	12.3477626093781	0.546534	12.8816390582013	0.52448	12.3506730282615	0.500943	12.596826504605	0.506193	13.1793010955171	0.498632	10.4292909220013
Ehf	chr2	-	0.397436	0.693368986415272	0.689655	0.620771253044854	NA	0.356389625503248	0.46875	0.66132071729263	0.477778	0.62863477024552	0.607143	0.658311843881154	0.649007	0.55583650095958	0.670732	0.582516401758413	0.584362	0.616731490341357	0.625	0.477142913643132	0.545455	0.520795732498769	0.685714	0.633891803298301
Ehmt1	chr2	-	0.470394	12.1310622468649	0.456877	11.5011055944853	0.538991	4.7924448586838	0.473295	11.4001155093882	0.481599	10.8583299698912	0.494066	11.8466675801155	0.479566	10.7402049491422	0.510996	12.1716307220056	0.495729	11.9139514516608	0.506201	11.8921537042609	0.51273	11.04264678944	0.477364	10.2410301367612
Eid1	chr2	+	0.35316	4.13765369964936	0.341176	3.96599777189242	0.253731	2.38240937074761	0.380074	3.74938486017889	0.324251	4.86829564634637	0.369565	3.69199289317677	0.419598	5.03480871154832	0.387821	4.41789257792507	0.384439	4.70764338499964	0.352941	4.32119533289287	0.377163	3.54563562958536	0.260204	4.04322469597895
Eif2ak4	chr2	+	0.543852	6.92901665673934	0.496703	7.33604218797101	0.497446	3.73088369656504	0.490916	7.47621304043614	0.535281	6.30002829879499	0.540911	7.28886501549103	0.531717	6.0975589821363	0.503743	7.63209891406719	0.522042	6.23448112666731	0.510496	7.62147261416608	0.534983	5.76586932329212	0.486957	6.46596205972273
Eif2s2	chr2	-	0.557716	109.972336879115	0.585146	99.1710212855411	0.540426	88.967290228628	0.568376	98.7035222050049	0.551186	110.968036622329	0.582609	100.086187972851	0.549386	116.328946790112	0.565217	96.3551693785782	0.523313	106.868130608689	0.573677	93.8338516377216	0.538278	104.014790148244	0.585324	99.587390498314
Eif3j1	chr2	+	0.444444	14.6485969922296	0.659574	13.2301864431953	0.368932	12.7203698817466	0.525	13.4301796249592	0.529412	15.0611017345203	0.382979	14.0204374167139	0.520833	14.7593925264012	0.35	13.4851491361718	0.487805	14.2730247837951	0.571429	13.6156581817722	0.708333	13.6442352006902	0.536585	14.3484979621832
Eif3m	chr2	-	0.526297	87.1355709459475	0.515685	73.0428777188415	0.579882	114.560343049714	0.528174	73.2642713952737	0.52185	91.8897959868966	0.521628	74.98733287123	0.515034	97.1263414990867	0.51653	75.5838861942462	0.52681	83.8785082145171	0.508197	75.3501473748281	0.50103	81.5300137539103	0.521425	75.7685846539493
Eif6	chr2	-	0.520104	43.8647324453034	0.53216	34.3964250970993	0.526511	115.220744341816	0.536199	35.8284399653319	0.547313	50.6587593696149	0.546836	37.0012103157296	0.54406	53.53386967765	0.525226	37.4432312172175	0.54482	49.4247708730166	0.534397	38.0365026739173	0.550597	47.2516549762213	0.52157	31.6991494806092
Ell3	chr2	-	0.455696	0.050031572066184	0.519481	0.0197569663640303	0.510204	0.0247475535716826	0.511905	0.0266213606195875	0.561798	0.0597726506944072	0.588235	0.0593907913086179	0.616822	0.04546909947517	0.68	0.0386910238976165	0.49	0.0706350543866653	0.494253	0.0456286386944344	0.519608	0.0914488113498075	0.452055	0.0570593258298494
Elmo2	chr2	-	0.482855	5.95331009679378	0.518159	7.2394787738023	0.517448	3.51157070667099	0.503848	7.28540636995193	0.507324	5.45097460774928	0.544565	6.9608293048483	0.522775	5.82314800569634	0.512099	7.24793622806058	0.536217	5.87451415128731	0.498056	7.63871564637742	0.505919	5.35907631394798	0.501555	6.68757257816954
Elp4	chr2	-	0.422691	7.56690368945184	0.502959	6.03766461245805	0.486096	5.84222761819265	0.490771	6.05762321313746	0.483841	7.42576404477776	0.516765	6.6640119361659	0.46851	7.42778440115401	0.484405	6.69507471841382	0.514868	6.86414735638729	0.438923	6.53152716302395	0.484563	6.76026656054273	0.46312	6.63913483519051
Emc4	chr2	-	0.493392	38.8342562157932	0.451852	38.5927547811445	0.398844	46.02292187038	0.460076	39.4167581768942	0.377682	42.3205897199536	0.493724	38.382333893816	0.515254	43.3284427981201	0.473077	39.8429277649866	0.467085	41.0706480423208	0.475	38.6954819838765	0.479339	38.610120621315	0.476744	34.7865077828774
Emc7	chr2	+	0.494172	5.78178596830163	0.486486	6.05520837629338	0.513514	7.30876899261461	0.474729	6.1417960136964	0.515337	6.34114022872009	0.52069	6.04265112531692	0.470305	6.54832882471158	0.509434	6.2030158781686	0.505185	5.90471115540085	0.457232	6.13822081520218	0.555094	5.36905648433037	0.473945	5.88306246013807
Emilin3	chr2	-	0.454545	0.591168672030212	0.377778	0.443083938440217	0.50495	0.514272019402524	0.333333	0.534040400817119	0.295082	0.627208507709351	0.4	0.366589157175517	0.512605	0.519216619288758	0.0689655	0.441817033036058	0.327434	0.580207767224783	0.649123	0.443586758784605	0.326531	0.458629449536538	NA	0.246538744355014
Endog	chr2	+	0.410638	14.8723067132364	0.382979	13.4457028943842	0.414067	62.6946560131082	0.350731	12.5321995996716	0.44533	21.27655203379	0.409302	11.8278744308884	0.348471	23.0442357960988	0.341151	12.6874164206131	0.401734	20.7649885442585	0.420221	13.501387562699	0.445902	21.4544460296199	0.435583	10.9325238868913
Eng	chr2	+	0.521739	14.2336255907191	0.466603	17.9035305990252	0.51004	15.0086453910437	0.485788	18.9751179174188	0.504202	13.3984944450588	0.521246	17.6041563009091	0.496726	13.6586737374155	0.500924	17.9074541423567	0.519038	12.9163735074351	0.488786	18.0790095449115	0.499055	13.290095582501	0.478455	16.0036548075235
Entpd6	chr2	+	0.564935	6.73641252072574	0.551992	6.00764868095939	0.586314	7.58192483164101	0.568042	6.67864429885286	0.565418	6.48190062790365	0.560394	5.9895353912615	0.575496	7.05904198480327	0.571824	6.33799485604108	0.607105	6.89037416963824	0.572377	6.27027080685144	0.595525	6.38042187104313	0.598708	5.36103307092323
Epb41l1	chr2	+	0.452174	3.21120034178881	0.417647	4.61027301939276	0.371134	1.93538835206024	0.40625	4.29745728646971	0.434483	3.12266471900648	0.507937	4.08304821082822	0.346939	2.93795442706392	0.437908	3.84784045044942	0.451977	3.74794602190506	0.434579	4.29833116374045	0.417391	4.58857381003745	0.432292	5.43532928176699
Epc2	chr2	+	0.51632	11.0372274411086	0.479167	12.8627231067093	0.456897	3.13851878040874	0.481894	12.6419723615923	0.496732	9.31763617456632	0.534851	12.4364510881191	0.522411	8.76098163386622	0.506596	11.7890651940456	0.548038	9.97898723426857	0.529132	11.8579209832148	0.516129	10.2039190182819	0.476268	14.1838387649693
Ergic3	chr2	+	0.502714	26.3904664068159	0.489188	26.1592108485478	0.503012	58.6007133703057	0.4991	25.9343638381103	0.501244	29.8299626402782	0.449652	26.2121252773699	0.50063	31.549252388316	0.456383	23.3905572548795	0.468921	27.938926854236	0.527113	25.953385754995	0.510267	27.4065102840532	0.543834	25.1737813288883
Esf1	chr2	-	0.565922	29.8910867316153	0.539196	23.3548464833757	0.54881	11.1764180766875	0.548953	23.9540443778615	0.577857	29.1446596307292	0.54004	26.4372486351022	0.560615	28.0485791236586	0.541796	26.7883201502181	0.574104	27.6230664721271	0.548613	25.4370603370356	0.586632	26.8818546691465	0.535725	28.8673114800807
Etl4	chr2	+	0.489847	10.0013054285258	0.517105	10.4064874010387	0.527523	2.1610943246583	0.500329	11.9852788658137	0.495734	8.56458590486596	0.52283	10.886266373353	0.51073	7.30933036869532	0.493047	11.5653338981992	0.484051	9.3508703972424	0.509915	11.3604682031452	0.512554	9.91190042750625	0.53397	11.878353527272
Ext2	chr2	-	0.475189	7.93316820905798	0.480542	8.40792644981036	0.489142	8.22916944463179	0.494315	8.07920876680246	0.488774	8.29253085238811	0.49128	8.21194396636791	0.483087	8.4283348252386	0.460596	8.3349641921909	0.481231	8.1888808847579	0.493697	7.97381943008863	0.469424	7.65405679254305	0.501084	7.58587807994367
Eya2	chr2	+	NA	0.380356698490714	0.333333	0.262848334144473	0.272727	0.378020342441563	0.3	0.314820275433798	NA	0.260164681670223	NA	0.292644466117388	0.5	0.336069280629842	0.45	0.376529083391081	NA	0.244973569290859	0.576923	0.417344969428802	NA	0.266140577580428	NA	0.337387576287196
F2	chr2	-	NA	0.313463559297679	0.666667	0.417545464580693	0.470588	0.334258968028494	0.454545	0.409272996769681	NA	0.332431699007859	0.6	0.301995839131327	NA	0.325132763987665	0.266667	0.427294100445271	0.545455	0.344494027179331	0.545455	0.464939837415073	0.230769	0.343306282703879	0.272727	0.466297370112707
Fahd2a	chr2	-	0.674603	1.8937348188668	0.649789	3.38137170737495	0.54	3.29702369559579	0.594118	2.41093450122504	0.470085	2.08775287114436	0.521739	2.73625242891675	0.669951	2.27162906152735	0.721698	2.74142962216468	0.594872	1.90323571013147	0.647887	3.11630659094294	0.623529	1.96782152584151	0.641732	3.68498163434682
Fam107b	chr2	+	0.442894	14.2464018011926	0.470937	16.3893016428888	0.403855	7.72667038774353	0.47758	19.9295063177483	0.458367	13.6825137240369	0.446378	14.9473139603702	0.422861	13.5158620504317	0.446619	14.7115881895234	0.438894	13.8034293620836	0.456957	14.987679704812	0.407912	15.0856810597	0.461788	16.7220616181139
Fam110a	chr2	-	0.597826	3.72346430080232	0.436047	3.71837386435309	0.485401	9.37256123828313	0.448276	3.5331804678228	0.455	3.61804640066418	0.415842	3.66041386638087	0.428	4.31449115347338	0.466321	3.57054863490148	0.416667	3.74177943467	0.365079	4.02400866700934	0.548718	4.00409677108041	0.476636	3.34056886745575
Fam129b	chr2	+	0.461288	26.9533926744944	0.49	35.4699286754231	0.464825	34.0858882397471	0.462191	28.4484594714865	0.497976	27.865885227377	0.463323	32.9928218800895	0.477604	28.5203150321305	0.488636	33.3468262217583	0.497712	26.8447165830091	0.476002	34.5316111744521	0.462175	29.3448876185872	0.50038	35.8098215408939
Fam171a1	chr2	+	0.569106	2.89656639229765	0.522727	4.34106185073328	0.649351	2.40767734163402	0.558209	3.9407494646574	0.502183	2.89125415812006	0.594444	4.21645203671449	0.572549	2.92264613204072	0.588571	4.0694386233603	0.560261	2.64666781902669	0.498688	3.75962468922965	0.564815	2.45719785651875	0.587983	3.8379342319045
Fam171b	chr2	+	0.363934	0.801167130683775	0.511628	0.411786910358932	0.5	0.239031036239023	0.615385	0.581079324700962	0.507812	0.668488001498732	0	0.455391437767391	0.384615	0.595921073270394	0.5	0.590065058048609	0.488889	0.648411864292204	0.505051	0.50885385152659	0.551515	0.621058665607399	0.597561	0.500361810941768
Fam188a	chr2	-	0.669749	6.41130442150581	0.618257	7.81166091270017	0.663768	1.55570655325261	0.64428	7.00276286879787	0.676801	5.68245376983421	0.665963	7.28557864634248	0.679726	5.39891374785905	0.646081	7.7858462531818	0.654181	5.11211947477181	0.654438	7.93626764069957	0.671374	6.07158756456156	0.650288	9.9070546330025
Fam210b	chr2	+	0.535714	2.02529163245283	0.563604	2.3844915942919	0.52974	2.7370780566259	0.552013	2.51449312747466	0.603687	2.07896010492823	0.540187	2.18953941158414	0.654344	2.03724696183192	0.493333	2.48319996892251	0.670168	1.86861948603094	0.571835	2.35174507404246	0.574597	1.93794619573203	0.593123	2.13703728048783
Fam217b	chr2	+	0.427673	0.631740114680209	0.505319	0.740268698026685	0.459459	0.328899818141752	0.389691	1.17330479111543	0.340909	0.497690243553344	0.464088	0.725916398556822	0.368421	0.425917502322249	0.408163	0.700070752646279	0.444444	0.438491052524033	0.471014	0.739751427396882	0.469799	0.491457125154064	0.242647	0.837947659054843
Fam69b	chr2	+	0.435556	1.39711404132889	0.473118	0.757243985438803	0.455307	3.01338446135968	0.513274	0.841782260221749	0.446903	1.63891973168146	0.389262	0.875510453459028	0.434211	1.80473852475633	0.477612	0.855546671403274	0.411552	1.48020246318173	0.441718	1.06949032578009	0.488281	1.49132937632631	0.46	0.807495467317416
Fam73b	chr2	+	0.537291	2.91563180962059	0.544629	2.89882658342968	0.602394	3.15405570348778	0.528761	3.6618748687121	0.572903	3.27249443749537	0.46505	3.28396512884799	0.541667	3.25669969266617	0.524517	3.03280912718347	0.557495	3.20475355326685	0.5	3.13820108063438	0.529132	3.11474190481679	0.47006	2.36819094797682
Fam78a	chr2	-	0.43125	3.82604932970789	0.480176	2.68506864484601	0.468468	4.00452125868117	0.428094	3.05998567784816	0.505405	4.00325651829745	0.537705	3.03407099613455	0.495283	3.90523841436602	0.491228	3.27698009033404	0.471239	3.7751807165241	0.542936	3.29575817712035	0.502232	4.13043989309529	0.541667	2.59417889207331
Fam83d	chr2	+	0.546344	8.90688060119001	0.532747	9.33438692216284	0.496914	4.36818193775289	0.521013	9.46237286081928	0.538141	9.49722669573426	0.476215	8.67250396595859	0.521537	9.0539019904271	0.5086	8.97721913914117	0.510836	9.66016020480739	0.511303	9.28910364641469	0.515663	9.30232730009911	0.517199	9.03082241051367
Fam98b	chr2	+	0.478977	24.822743861226	0.496811	20.7574614719103	0.469123	16.9252825973081	0.477737	20.4525670577844	0.453084	25.9487358625207	0.487928	22.3043080326925	0.470156	25.3459547991462	0.47223	21.9040272370468	0.460079	24.4690118321643	0.453756	20.1400975161237	0.47974	22.3682376318976	0.48673	19.1205007363304
Fastkd1	chr2	-	0.526565	6.92111351031101	0.49508	5.45313199921874	0.489362	3.83969730898964	0.549031	5.91673725877269	0.571991	6.26467351514542	0.547853	5.98761594134523	0.554466	6.06089578793511	0.528395	6.60388285133067	0.588627	6.29830859510385	0.532414	6.56660075101394	0.550828	6.8113486298331	0.532963	6.52691504806259
Fastkd5	chr2	-	0.589928	3.17207989888842	0.555046	3.17153371493434	0.496063	3.62512671142076	0.593301	2.72650412793446	0.577963	3.45888370369924	0.600394	2.97183771655948	0.564489	3.63300366950861	0.613462	3.32094746910272	0.571429	3.25207791157037	0.549488	3.59189324827046	0.537402	3.05557321903138	0.607345	3.17358536044115
Fbn1	chr2	-	0.3	0.25812557205273	NA	0.349624020534975	1	0.0834168857198535	0.71875	0.308857610437055	0.923077	0.249446989925208	0.484848	0.337223603134548	0.75	0.22578962037369	0.608696	0.327205216528615	0.65	0.278644322269702	0.52381	0.334723198288709	NA	0.232217811019014	NA	0.23550682918841
Fbxo18	chr2	-	0.551724	9.4773253827356	0.535231	9.71374523178526	0.55614	5.2554804675864	0.540644	9.91626165953079	0.568951	9.43484706112423	0.54749	9.84075803671417	0.586546	8.63879554911312	0.505786	10.2486206174785	0.495321	9.52175829692638	0.543823	9.78510171051885	0.525622	8.77539843751097	0.553106	9.92210760234697
Fbxo3	chr2	+	0.521498	9.11436009128308	0.542844	8.21072986547706	0.482759	2.9531214300082	0.546699	8.57755357829979	0.539004	8.56160421581076	0.545546	8.03363649796122	0.549889	8.06649280812869	0.544171	8.40074245211031	0.541667	8.51710955424802	0.557225	8.74376048675125	0.544503	9.02328056254458	0.551874	9.29201192440205
Fbxw2	chr2	-	0.480539	8.40545757127609	0.453846	7.67807990575346	0.388186	7.48031989245652	0.475904	8.68590187831671	0.504923	8.92489997861023	0.43467	7.76662273121834	0.562139	8.63349371823493	0.494815	8.27772486173315	0.496089	9.01119787976492	0.513055	8.25754815823383	0.495575	8.99288755091301	0.532362	8.10181169534786
Fbxw5	chr2	+	0.578767	6.62112728828877	0.559865	5.76525368407778	0.529992	7.84307706166774	0.553822	6.57125433695033	0.550077	6.45265218429073	0.52993	5.91423566966564	0.534591	6.61510590488652	0.565371	5.82102144268302	0.529543	7.29474818527112	0.561562	6.41731221271266	0.565625	6.65635058153292	0.521875	4.6968179472289
Fermt1	chr2	-	0.52331	1.83745911688484	0.532972	2.14099092596909	0.559223	1.23312208944564	0.51582	2.60353543571331	0.527601	1.79926271742859	0.557413	2.50541114367594	0.547368	1.58128586953524	0.589109	2.3739410995402	0.544737	1.33211913952699	0.515391	1.9616251375905	0.494071	0.667693462057465	0.47027	0.7987561855383
Fign	chr2	-	0.2	0.0989188770613388	NA	0.102718784897953	NA	0.0217462703669314	NA	0.0964954224083451	NA	0.0831624701706718	NA	0.0942285434043509	NA	0.0849039308586909	NA	0.0878300602671343	NA	0.0716177546270964	0.3	0.117779009449748	0.8	0.070313485705314	NA	0.0787904881842897
Fitm2	chr2	-	0.475824	2.9316818437442	0.533195	2.53404135510014	0.498483	2.95099136414134	0.423888	2.46532790628167	0.467125	2.83047433201749	0.436426	2.59381209062829	0.512598	2.6921271519988	0.435633	2.78742152125518	0.406584	2.85558961799598	0.459459	2.56617959962696	0.4505	2.899716287666	0.420779	2.51548839620296
Fjx1	chr2	-	0.585635	1.43341890740991	0.427778	1.25633880877077	0.596215	2.01754943764036	0.59633	0.878976338070632	0.585366	1.88885899253513	0.414966	1.13437548428011	0.530864	1.73164147028044	0.420732	1.14005188316063	0.589928	1.62504661473931	0.44335	1.17176353341571	0.681818	1.66547937916769	0.408451	0.985416481773865
Fkbp1a	chr2	+	0.492298	61.815518482519	0.49059	55.4729206864362	0.486876	103.715091386718	0.496547	54.4576443529061	0.4841	68.3980750976981	0.501004	55.4052796377832	0.499174	72.8564218808546	0.488608	57.0857117084586	0.487786	65.3396581422958	0.495288	55.9739890691011	0.501819	63.3316953290506	0.499057	55.1649071817284
Fkbp7	chr2	-	0.493151	0.780001593943798	0.53125	0.806110836361344	0.540541	0.985402587672451	0.678571	1.08945901565918	0.516854	0.871701260519783	0.52	0.73961865360317	0.581818	0.829811065421852	0.578947	0.960501411438137	0.533333	0.801298985272193	0.655172	0.908424715825558	0.59	0.758609457788176	0.475	0.925629063462001
Flrt3	chr2	-	0.109091	3.27854812916215	0.0888889	2.45169129776541	0.105263	0.909784163678402	0.106599	2.30686538606425	0.110599	2.98965638964832	0.05	2.6705306346082	0.097973	2.79901327514339	0.0989011	3.06537887997889	0.093633	3.12585663559944	0.0470588	3.07071828401877	0.081571	3.56086445592	0.0957447	3.09326723145773
Fmn1	chr2	+	0.25	0.375128862787778	0.42268	0.622914809470579	0.5	0.131412611549053	0.542636	0.58028151573322	0.510204	0.387303898006886	0.379032	0.550963347484485	NA	0.274861104997821	0.514851	0.54848930221035	0.603306	0.35936674794121	0.535354	0.545972281228211	0.446429	0.393469840221886	0.464516	0.819702038079132
Fmnl2	chr2	+	0.582952	10.9125480031662	0.586788	8.74726340891272	0.609137	2.05421512972438	0.581673	9.62016016044928	0.600662	10.2268399634976	0.585366	10.0369420065014	0.57601	8.72106258960261	0.603655	10.1802670263083	0.583476	11.0255313634879	0.578721	9.98563244834522	0.60434	10.4734127230387	0.551823	8.08684310363531
Fnbp1	chr2	-	0.576054	8.90629679678037	0.542608	11.0678604362789	0.568998	5.19817057963603	0.530799	10.3188892585674	0.550497	8.68475359443095	0.551144	10.7026587711367	0.588788	8.01930075486941	0.533715	10.9007234357529	0.546251	8.95116077084733	0.531397	10.9677793114447	0.561408	9.07392966750091	0.54456	12.157829908684
Fnbp4	chr2	+	0.486523	17.7071115344144	0.491477	22.3623469003023	0.478873	7.28336704251089	0.513948	20.6550195333468	0.446839	16.4845579617504	0.488867	21.757767828325	0.4883	14.5100336838386	0.479927	22.1626451888943	0.4962	17.4033667717576	0.49651	21.5454179572747	0.490052	17.7250488425904	0.495878	24.3107943573593
Fpgs	chr2	-	0.458716	19.9261535760398	0.481793	17.6887206558378	0.541147	32.9145717047509	0.504478	16.8753309106956	0.52027	23.1291754911294	0.483483	17.3101818728911	0.531873	23.0413346072028	0.54321	18.2452295964121	0.549902	22.7595045713719	0.561097	18.6541264140692	0.538631	22.4069130721079	0.444444	15.7667176425652
Frmd4a	chr2	+	0.649246	1.14697340699588	0.684549	1.0105074856203	0.62782	0.507542117961771	0.667785	1.22593930880669	0.588813	1.09318674428465	0.726202	1.03235693260565	0.655357	1.05441089126622	0.670678	0.946521632801542	0.611238	1.23018783272544	0.698819	0.962356354468521	0.662861	1.32782646015125	0.704148	1.30043946153623
Frmd5	chr2	-	0.349515	0.655623252813257	0.228916	0.53431751443999	0.5	0.327150753118607	0.313725	0.727349374213424	0.25	0.558946720667357	0.279412	0.487452204768732	0.298611	0.548886639209782	0.264463	0.566138357694596	0.27193	0.564204651151946	0.392308	0.602613091659925	0.317949	0.548507985756297	0.25641	0.530557754393629
Fsip1	chr2	-	0.822222	0.562705905285421	0.697674	0.708349766195942	0.754717	0.768364549374974	0.760563	0.686325635112833	0.535714	0.780625773963414	0.73913	0.739051990410869	0.671429	0.674352789874467	0.5625	0.664995851242832	0.736	0.638645434287068	0.630435	0.74628815262125	0.729167	0.42462924333409	0.733333	0.641747166241106
Gabpb1	chr2	-	0.503808	7.5820457634465	0.455788	9.47738006457822	0.524339	4.96620701273433	0.498047	8.53604037978297	0.49569	7.27984416180078	0.487329	8.8608374052115	0.508389	6.7984134113702	0.451155	8.54766172685502	0.512397	6.78621785168244	0.469034	8.66398940062795	0.505682	6.79298952748905	0.444559	9.28494788116683
Gad1	chr2	+	0.364407	1.23762950023873	0.405579	2.23919182336041	0.464088	0.889214361088549	0.435203	2.1503134829828	0.437247	1.10622569878339	0.448113	2.01670052714318	0.445205	1.111266814932	0.40795	2.2572634069029	0.412541	1.21500800450423	0.387658	2.42491366495326	0.476341	1.27480947894054	0.404453	3.11038576979354
Galk2	chr2	+	0.417847	3.51980844113354	0.363512	2.89967880840807	0.41255	3.68851554458098	0.416427	3.21046918749993	0.414338	3.76279046955183	0.373397	2.88180612535717	0.39602	3.88871709863427	0.433471	3.02022590125892	0.429816	3.69409625002333	0.428934	3.10014109759704	0.405295	3.83859127002195	0.404973	2.90877239015467
Ganc	chr2	+	0.342593	0.69865988168939	0.437681	0.707176023395007	0.175676	0.349556473492719	0.480769	0.669792379572965	0.425397	0.64760276230583	0.506276	0.683185627080591	0.350148	0.573368793555007	0.376694	0.718842302504145	0.414201	0.710346793391776	0.416149	0.708583262838867	0.392704	0.688052773389672	0.441748	0.836049243618854
Gapvd1	chr2	-	0.479698	8.87382995113684	0.506334	9.70597618155412	0.470405	3.88436506410113	0.488186	10.5603372701201	0.477811	7.69446068774389	0.482001	10.0409662535967	0.473123	7.27654007796999	0.499087	10.1859158011056	0.488087	8.34802526820716	0.469628	9.90417843498678	0.471062	7.90464654179005	0.474147	9.43081513019878
Garnl3	chr2	-	0.575	1.23554212451794	0.481481	1.5155858086604	0.222222	0.98577487923731	0.485714	1.65316127832359	0.428571	1.1056875774907	0.313725	1.48121172041231	0.37037	1.11955969925965	0.407407	1.62236362228077	0.47619	1.07413441332502	0.651515	1.73528830714897	0.521739	1.13192613437216	0.578947	1.6316588835534
Gata3	chr2	-	NA	0.424961122785816	NA	0.37343547031459	1	0.549510157613555	1	0.468985659180666	0.981481	0.559410705216888	NA	0.28336782781236	1	0.488124156130501	0.9	0.344357893689068	1	0.466638820834983	NA	0.361097682729805	1	0.349269286560846	NA	0.269252151621138
Gatm	chr2	-	0.435897	0.76672842363339	0.534247	1.11016902298115	0.375	0.343134189975912	0.307692	1.16077027340039	0.40625	0.770611081428395	0.627119	1.09796771136359	0.680851	0.725842734665899	0.565217	1.1246955913724	0.517857	0.701824164558046	0.565217	1.26531666516189	0.657143	0.563079829131344	0.711538	1.15400700585851
Gbgt1	chr2	+	0.666667	1.55707831987578	0.571429	2.24375300876168	NA	0.324291053534688	0.646341	2.15848062675122	0.452381	1.49036718921657	0.425926	2.10777340882118	0.537037	1.18234112163697	0.540541	2.15477459941401	0.610169	1.56639867457547	0.506024	2.10204858981699	0.785714	1.71325449348646	0.540541	2.57690621311064
Gca	chr2	+	0.3599	6.06549208698611	0.346754	7.99609460030877	0.374449	2.15156348711507	0.37083	8.51252951715906	0.377401	5.96890730171871	0.349406	8.42771995489574	0.411636	5.30528957784373	0.406406	8.63323972952801	0.376294	5.92695638114812	0.359195	8.31745568867857	0.386823	5.57007158497124	0.354323	8.82359599425968
Gchfr	chr2	+	NA	0.994980034512217	0.5	1.56524183132085	0.176471	2.57681503546388	NA	1.01687406552727	0.2	1.08239466683826	NA	1.12029141228142	NA	1.17717383699379	NA	1.3574850710125	NA	0.940874087590536	0.214286	1.56861709651274	NA	1.00912699966241	0.0714286	1.79898007350588
Gfra4	chr2	-	0.828125	0.404874430761914	0.478261	0.299776602798335	0.697842	0.942921798673484	0.777778	0.26255547465577	0.575758	0.463548639796349	0.638889	0.373809938213441	0.661538	0.436944394725594	0.528571	0.397900991723063	0.666667	0.456185249098033	0.693878	0.409630313544897	0.860465	0.289077507009351	0.421053	0.387536549499597
Ggt7	chr2	-	NA	0.383645458070529	NA	0.658383955703301	NA	0.249067749641474	0.666667	0.607299789134339	NA	0.316382402521561	0.8	0.611011878720401	NA	0.33177188736995	NA	0.510546078207826	NA	0.306231726172958	0.4	0.455395202594844	NA	0.287616177700021	NA	0.508634142671806
Ggta1	chr2	-	0.578947	8.63576231105184	0.6	7.85600587562721	NA	4.04358943918539	0.613333	7.7565169925028	0.564706	8.12018673697072	0.614679	7.81051756443094	0.554217	8.15184962548628	0.58	7.95331011093966	0.544776	8.988272305289	0.5	9.01865692606601	0.573529	9.78451546675548	0.628866	10.4667156802933
Gid8	chr2	+	0.54562	35.059838778459	0.533643	26.4687221532654	0.594657	37.5464780615374	0.506608	27.4113041186545	0.56124	36.2790556212816	0.521318	27.0090711042499	0.548796	37.4728397928123	0.580882	29.0755036302363	0.575646	36.0504055751199	0.555556	27.8813389343782	0.547712	35.9103365431113	0.569132	24.2703933181059
Gins1	chr2	+	0.501622	36.7157813687804	0.490264	29.8250695068612	0.479696	60.7870762938532	0.501618	31.8616068790163	0.474042	38.7122540133929	0.484113	31.3057897581301	0.483022	41.2579215410106	0.478545	30.8434582754802	0.469936	35.9961369557424	0.484707	31.1199881830512	0.468443	36.370469601378	0.515438	29.7916138923338
Gle1	chr2	+	0.509448	9.13654778232351	0.46963	8.79998067118223	0.51453	7.2120396387067	0.475344	8.79971108947736	0.501443	9.56264213885783	0.502976	8.99109777561948	0.527401	9.35326715928919	0.529138	8.6422348228679	0.488372	9.55931128043671	0.49594	8.8484477413007	0.501952	9.34409441549635	0.520679	8.54592262844274
Gm10130	chr2	+	0.698925	11.3133626962105	0.649123	11.0430357208323	NA	1.31170201439347	0.552632	9.23576709020143	0.772727	9.02442088151864	0.666667	10.9222866700348	0.669903	8.0516321199348	0.738095	8.57587183156411	0.589744	8.56120529710123	0.654545	11.0480035571524	0.629213	7.47718529928841	0.646341	11.4296205431729
Gm10134	chr2	+	0.493671	1.72549831220383	0.717391	1.70345497390655	NA	0.474165724601792	0.5	1.68322461240384	0.8	1.10707525389379	0.756757	1.63103844197508	0.558824	1.24144962543427	0.506024	1.89037640381662	0.513889	1.28050101622828	0.737288	1.96706139253566	0.578947	1.41268611627483	0.3125	2.01472692665801
Gm10762	chr2	-	0.521739	1.38152998140137	0.857143	1.10747125664569	0.53125	1.35532718369188	0.488889	1.14491822558777	0.472222	1.48912858511397	0.636364	0.956647785862557	0.545455	1.80170805025398	0.565217	0.847582712390858	0.37037	1.43883735268051	0.615385	1.09143260760595	0.75	1.32572526603759	NA	0.835061902543263
Gm11448	chr2	+	1	0.55654167784098	1	0.512803038070831	1	0.562044438894657	NA	0.388671865045977	1	0.743394670488219	1	0.770760491649619	1	0.497886639253111	NA	0.313827193836223	1	0.55530019679363	1	0.444118749959162	1	0.751023363210294	1	0.515707621071686
Gm11457	chr2	-	0.56962	6.70831486683324	0.483516	6.39695626573052	0.5	2.48249948957844	0.442308	7.00005961026683	0.5	5.42209777410219	0.466667	6.76381655937421	0.416667	4.70790767729132	0.447368	7.74320566016314	0.556391	6.13582433191795	0.507692	7.40953220595132	0.416	6.64170321206383	0.432836	6.21763662453776
Gm11688	chr2	-	0.424242	2.38856665713002	0.647059	1.7794098926565	NA	0.351929495597304	0.735294	2.88664575095023	0.578947	2.31392609885167	0.382353	1.64224536573072	0.423077	1.89940519844937	0.558824	2.29256878614124	0.641026	2.31804349310885	0.607143	2.06828841549569	0.423077	2.27582837336453	0.521739	3.36163059689586
Gm13261	chr2	-	0.744076	5.09481168317662	0.672269	6.22150744718287	0.701587	5.15404196591424	0.698616	6.8017576383046	0.730263	4.10673270653339	0.648064	6.12074508074698	0.709677	4.21007084662557	0.700237	6.13347559718148	0.647635	3.73311056667987	0.683206	6.56381387807291	0.676471	3.22743700203117	0.585756	6.56302119576524
Gm13375	chr2	+	0.209302	4.47220991122216	0.267442	4.01940905864944	0.208696	7.63667774326171	0.214286	4.40327903316139	0.24	4.71765327748481	0.26087	3.6552458913126	0.253623	5.17417321237865	0.290698	4.4979447922194	0.252101	4.68168784181983	0.230769	5.25083314226453	0.204082	4.30915044464923	0.276923	3.38633449613817
Gm13384	chr2	-	NA	0.698782798628463	0	0.826293957828975	0	0.457019553310388	0	0.672367623684447	0	0.822466929693876	0	0.666673416326401	0	0.768686589620689	0	0.61994880925236	0	0.655169237288403	0	0.734208591938626	0.00925926	0.773002717589961	0	0.717244459251487
Gm13420	chr2	-	0.225182	3.28549609884928	0.242857	2.31343029606313	0.269634	3.22897731524199	0.210702	2.71197486036893	0.189427	3.78614908095463	0.252577	2.49031231261678	0.236842	3.70790920617005	0.226087	2.65358007620454	0.200318	4.42815005692446	0.208661	3.20571508334409	0.199372	4.34827153462728	0.203846	2.66707706448623
Gm13421	chr2	+	0.411765	1.05261229541842	NA	1.13153534630355	NA	0.202479983768312	NA	0.490075047769678	NA	0.851307449283981	0.547619	1.18781582617236	0.5	0.604532345294874	0.608696	1.21349120406161	0.568182	1.05211654436082	0.525253	1.39996959630651	0.64557	0.997623396543355	0.333333	1.24493074537853
Gm13499	chr2	-	NA	0.493203912265794	NA	0.263098573637087	0.0277778	1.25830844528655	0.0285714	0.676791804806427	0.416667	0.530651614235588	0.25	0.551227963555387	0.1	0.639904055424811	NA	0.327879157739338	0.25	0.513070544301151	0.1	0.51786234836656	0.181818	0.560465196425593	NA	0.296043410488913
Gm13580	chr2	+	0.566667	9.15380774231603	0.610619	11.4412382776293	0.549107	24.2259311085904	0.586777	11.1502816407845	0.575	11.8978552462913	0.547009	10.4430556896431	0.48538	12.6890720339684	0.522388	10.753848806455	0.635802	11.6049612050764	0.518987	11.2329284096893	0.454545	9.97383795076098	0.430556	9.43034254079851
Gm13625	chr2	-	NA	0.717417006591888	NA	0.510799901203367	NA	0.188184521951336	0.8	0.242919915653736	NA	0.515124024387217	0.571429	0.270970485345569	0.916667	0.414905532710926	0.8	0.411898191910043	0.7	0.471013559780311	NA	0.416361328086714	0.6	0.469389602006434	NA	0.297523627541358
Gm13655	chr2	-	0.133574	4.87440865491597	0.159794	3.23298224085763	0.27451	2.81291655899339	0.3	2.69983476726568	0.262443	3.88508857555997	0.22561	2.85155517464331	0.187861	4.49434583755325	0.121076	3.63955295938922	0.201278	4.00902251376417	0.164384	4.22508945011485	0.139456	4.09954587524188	0.152174	3.6900917026606
Gm13657	chr2	+	NA	0.217959688814076	NA	0.104134190943986	1	0.21429160622411	NA	0.210472129086269	NA	0.240035949840356	NA	0.104344831902024	NA	0.160484347361111	NA	0.240347283572352	NA	0.227062262742551	NA	0.27055970778198	NA	0.219484221670535	NA	0.266988711666819
Gm13777	chr2	-	NA	0.680553682142503	NA	0.418045954949047	0.948276	1.98984677124195	NA	0.506963302233883	0.988372	0.716694294799607	NA	0.502669885858447	0.951049	0.974126033321305	1	0.77774565428977	1	0.931248777231554	1	0.543079993156584	1	0.76190775977856	NA	0.25871619786205
Gm13778	chr2	-	NA	0.280347486972135	NA	0.215262469339435	NA	0.10785500959599	NA	0.369818379054941	NA	0.260501701533834	NA	0.172558319026034	NA	0.278667895104353	NA	0.147545620982702	NA	0.37296281874199	NA	0.24235957903555	0.8	0.298914771426983	NA	0.37301469721603
Gm13816	chr2	+	NA	0.525406479080646	0.181818	0.746343582506935	NA	0.176867131120696	NA	0.733855968967928	0.0833333	0.508555186560807	NA	0.646792020964716	NA	0.243720732501523	NA	0.671546302894296	NA	0.349489634345641	0	0.960833834046264	NA	0.350127442056081	NA	0.773977548569126
Gm13885	chr2	-	NA	0.0837044635790244	NA	0	NA	0.193216193661265	NA	0.311768875705329	NA	0.388895142664146	NA	0.540974944005415	NA	0.332811924634433	NA	0.0755199129552408	NA	0.381795398864986	0.4	0.534367479897387	NA	0.267744514513474	NA	0.095462126483858
Gm13886	chr2	+	0	0.13231390269888	0	0.15848994995321	0	0.122168818984468	0	0.160166977354111	0	0.19671585238396	0.0408163	0.219891518116438	0	0.136782043750855	0.047619	0.238752725657313	0.0277778	0.261522855632793	0	0.190055044097063	0	0.201034712609124	0	0.271619203503522
Gm13889	chr2	-	NA	0.52850469137647	NA	0.331553688407865	0.405797	1.60930211875625	NA	0.397886068743188	NA	0.501540632263416	NA	0.352988371714535	0.447059	1.08197347969875	NA	0.355084648198313	0.271429	0.786447323045166	0.44898	0.49353174665451	0.304348	0.89022165897772	NA	0.33343165155497
Gm14001	chr2	-	NA	0.190114186509444	0.5	0.583910341932879	NA	0	NA	0.5900888639362	NA	0.412197361738759	0.571429	0.585091466333213	NA	0.201573538159154	NA	0.514574953456155	NA	0.28905157727835	NA	0.455131816127178	NA	0.304058041785544	NA	0.578183567691707
Gm14002	chr2	-	NA	0.121296288539664	NA	0.0965231149943995	1	0.101814521210726	NA	0.0924105350144538	NA	0.0973402213374929	NA	0.0509044002058132	NA	0.0745339280319029	NA	0.0746154828599685	NA	0.096401433046748	NA	0.0879946448932823	NA	0.11463313046535	NA	0.0565913204904308
Gm14005	chr2	-	0.727273	0.420978194577147	0.363636	0.507787849434441	0	0.671390842130537	0.181818	0.334980030388036	0.4	0.490749537975108	0.333333	0.416945620482832	0.272727	0.395631192560541	0.3	0.331475177841683	0.5	0.360760868332571	0.363636	0.323723477583313	NA	0.410094257009696	NA	0.270608287152531
Gm14027	chr2	+	NA	0.0251651683107356	NA	0.231874364079455	NA	0.0871336693279498	NA	0.1640295250395	NA	0.0701511816831467	NA	0.0697030187384101	0.333333	0.120069125221811	0.352941	0.136227238481962	NA	0.0573920736235952	0.363636	0.180735624732175	NA	0	0.333333	0.172200170281172
Gm14057	chr2	-	0.514286	0.811863832431409	0.549451	0.658292281755864	0.51497	2.24884407975041	0.461538	0.725735847596222	0.553957	1.23720292896515	0.610169	0.809538379455643	0.539394	1.29119979059417	0.369565	1.17196877366224	0.6	0.962805616847284	0.489583	1.08841343026817	0.39011	1.37635678596631	0.475	1.2592286310879
Gm14117	chr2	+	1	1.07693785525279	0.545455	0.95808396792593	NA	0.471465848589824	0.8	1.22756683355269	NA	1.0007014750499	NA	0.977165214057569	1	1.00404185851754	0.8	1.13915920894287	0.727273	1.38331009877417	0.64	1.02238190882503	0.805556	1.36603695957586	NA	1.143507180586
Gm14122	chr2	-	NA	0.370002978266582	NA	0.370570026869016	NA	0.0928351187426941	NA	0.389470779465393	0.545455	0.403603612602523	NA	0.371319609928838	NA	0.243058739614828	NA	0.362852613633865	NA	0.269048693204959	0.565217	0.449310785705087	NA	0.295881078345954	NA	0.366935614645045
Gm14124	chr2	+	0.791523	10.6270554600165	0.76372	7.29253326381792	NA	0.317257404800662	0.744741	8.55290597659574	0.737421	7.36390606257671	0.739184	9.21790473673905	0.782077	4.86256086546901	0.756126	9.12001790437573	0.723204	8.6110169681716	0.75443	8.36033680651255	0.770073	7.54424286326224	0.68	9.06766840995827
Gm14127	chr2	-	0.599099	2.23940304551611	0.56051	1.44651299455821	NA	0.47962072851314	0.575107	2.23572311752111	0.578313	1.58747226672167	0.462617	1.98232095474045	0.297753	1.41361619551953	0.546763	1.56219288967146	0.540426	2.08851843926808	0.557078	1.78703755860227	0.544118	1.79078825544244	0.553571	1.52711242454856
Gm14139	chr2	+	0.597884	16.2052907170819	0.65	11.9854355903274	NA	2.71822087263041	0.540909	14.1534589745475	0.585062	15.5715595607247	0.661836	14.3764896391677	0.573099	11.9357372864931	0.57	14.2856753860864	0.572	15.4456639559538	0.585253	13.705227049521	0.518868	13.6615553917305	0.655405	13.7501370922759
Gm14200	chr2	-	0	0.978295918079848	NA	0.525823427709348	0	1.22319939268368	NA	0.379562368208962	0	0.833288862979322	0	0.602156634101265	0	0.518631915888658	0	0.588425988442918	0	1.42543577301936	0	1.10595977773033	0	0.977895004180071	NA	0.464880668033371
Gm14222	chr2	+	NA	0.0816664418571003	NA	0.0250827572969428	1	0.534116764912314	NA	0.152088990670165	NA	0.151770556545799	NA	0.201067954343379	NA	0.194825206664261	NA	0.0982415563313394	NA	0.103472086359061	NA	0.152062398083844	NA	0.217687931365303	NA	0.093137831230338
Gm14230	chr2	-	0.613813	14.7570341113733	0.660674	12.8396187504777	0.585106	1.16935672927359	0.635193	13.7548274942397	0.623517	12.6344954397765	0.579114	13.5163263984757	0.623762	10.964248458224	0.641873	13.6717963243473	0.633688	14.6006296717918	0.621379	12.2682076127614	0.613036	13.9143634365885	0.638629	11.3706497054736
Gm14233	chr2	+	0.543478	0	0.54491	0	0.511202	0	0.531034	0.033200899633768	0.57	0	0.460094	0	0.512931	0	0.586957	0	0.604762	0.0271054440348339	0.5	0	0.564417	0.0570253123166511	0.492958	0
Gm14267	chr2	-	NA	0.647878091443608	NA	0.405933696320556	NA	0.0598202453885042	NA	0.386097879184745	NA	0.361208899063884	NA	0.263194290401877	0.772727	0.597628830229314	NA	0.32733631145169	0.454545	0.630425956624746	NA	0.413603968298061	0.666667	0.352301246539045	NA	0.177331963435246
Gm14276	chr2	-	0.573034	6.78285169868695	0.316667	5.8892223903447	0.62069	4.66697614439313	0.505051	7.51027405896132	0.511364	6.52490430890475	0.511905	6.16206955563628	0.555556	6.74221490655255	0.413462	5.982330882503	0.525862	6.95777925149161	0.521277	6.38420703066295	0.523364	7.1625376306167	0.507246	5.6033616520289
Gm14400	chr2	-	0.0206897	6.92825961656548	0.00900901	4.70845061156078	NA	0.245389090919213	0	5.57065998613906	0.00543478	5.93368376128414	0	5.15118911720164	0	4.48331177500752	0	5.60920174088537	0.00502513	6.7773004948249	0	5.25375839749699	0	6.42561753378987	0.0176991	6.24590584843262
Gm14401	chr2	+	0.650568	17.3722977175955	0.671171	11.7854987163852	NA	1.56324839905399	0.632867	13.456556952918	0.647564	14.8620565686967	0.625397	13.8101837527514	0.511182	12.0069727524923	0.639296	14.685412479063	0.648221	17.1908477562685	0.717791	13.9570332327036	0.641791	14.9187485242677	0.680498	15.0172196655186
Gm14412	chr2	-	0.137255	49.7303518938907	0.223301	34.6926580962412	0.2	1.35978493280965	0.350515	43.6426140684928	0.16129	40.7361389438392	0.266667	42.3680607067835	0.2125	26.8468285871776	0.183486	41.2947756291706	0.211538	49.9077745315609	0.204225	40.980383468421	0.231293	46.1729733738397	0.294118	44.1486673125886
Gm14490	chr2	+	NA	0.204657036063593	NA	0.123547846469387	NA	0.0651603754998314	NA	0.190568373867223	NA	0.196726938714685	NA	0.117282085631987	NA	0.106625858271068	NA	0.140076159557196	NA	0.193135454250007	0.981013	0.219631539162063	NA	0.208805714147737	NA	0.241452898816251
Gm14494	chr2	+	NA	35.8393649437252	NA	43.0025133865001	NA	45.6418846067903	NA	37.0913581556807	NA	41.7281806043163	NA	40.8303725964389	NA	38.9438917254876	NA	39.9967347730579	NA	38.8436590860569	NA	40.2578332398326	0	38.0978901490586	NA	44.6080252603387
Gm17096	chr2	+	0.636364	2.0500170943665	0.651163	2.20372383345582	NA	0.369694013110401	0.636364	2.90310840535706	0.419355	1.80568312215983	0.767442	2.36590873971575	0.613636	2.00377296834472	0.6	2.11929687515594	0.733333	2.22401462563031	0.59375	1.97672226704197	0.578947	2.16871230394969	0.4	1.72912776715714
Gm17250	chr2	-	NA	0.356448413716222	NA	0.75682874121221	NA	0.0894342282541003	NA	0.577235443137589	NA	0.316814775627782	NA	0.815594332129238	NA	0.221830680855347	0.636364	0.769031984895695	NA	0.377007205743907	NA	0.630725576210567	NA	0.347007494552611	NA	0.618613483006783
Gm20458	chr2	+	0.461538	0	0.370629	0	0.553672	0	0.563025	0	0.440141	0	0.404762	0	0.464706	0	0.52381	0	0.566038	0	0.39604	0	0.538168	0	0.633803	0
Gm20716	chr2	-	0.536549	0	0.482473	0	0.529801	0	0.489234	0	0.514844	0	0.506024	0	0.518189	0	0.528314	0	0.51146	0	0.504663	0	0.485813	0	0.503303	0
Gm21985	chr2	+	0.508021	0.176145072628675	0.492188	0.0795597167130523	NA	0.00398625642262318	0.434978	0.0932658105113636	0.449612	0.141210469278049	0.416974	0.0797206488218797	0.486842	0.115353259315041	0.46988	0.112180064875261	0.41206	0.160162552031954	0.439114	0.0937088602489957	0.409326	0.135334454241337	0.482558	0.0748404535298208
Gm22516	chr2	+	0.186047	7.44767215054336	0.0454545	3.60564636143553	0.269231	7.72163586845482	0.214286	3.87888252414836	0.177778	9.1490718562891	0.0714286	3.37984691398775	0.288889	7.52852781128697	0.157895	3.98611153461332	0.289474	6.52541705909565	0.047619	3.72710543690526	0.171429	6.76324802890991	0.153846	2.30340872935245
Gm23925	chr2	-	0.593407	0	0.59727	0	0.546939	0	0.652174	0	0.635417	0	0.599379	0	0.586294	0	0.548223	0	0.6097	0	0.54661	0	0.561966	0	0.587234	0
Gm24451	chr2	+	0.425587	0	0.351931	0	0.457627	0	0.405039	0	0.427419	0	0.4	0	0.435374	0	0.376068	0	0.425243	0	0.394366	0	0.454	0	0.412121	0
Gm24644	chr2	+	NA	1.0134864187302	NA	1.03759607523325	NA	0.129969166239772	NA	1.57286276322563	NA	1.25565568365229	NA	1.03969490780075	NA	0.537287740201199	NA	0.91438858635734	NA	1.45530884051774	NA	0.71889725712814	1	1.6209137335474	NA	2.18326690713802
Gm25184	chr2	+	0.674419	0.192058094346964	0.57377	0.0884821192990314	0.533333	0.221665203770899	0.786885	0.178836747720542	0.581395	0.178462310866737	0.698113	0.443305497497864	0.54902	0.229088944441616	0.7	0.60647586538902	0.627451	0.21900533615875	0.786667	0.306523677119053	0.844828	0.153583509858956	0.630952	0.328553699125426
Gm26003	chr2	-	0.731707	0	0.779661	0	0.877729	0	0.733945	0	0.847458	0	0.734694	0	0.74717	0	0.794007	0	0.761092	0	0.801325	0	0.8	0	0.72973	0
Gm26899	chr2	+	NA	0.329234203199949	NA	0.221019188020688	NA	0.0108567993433463	NA	0.249635249860509	NA	0.201038222187319	NA	0.282260922234968	NA	0.119684288281998	0.6	0.330989618499141	NA	0.25743656101353	NA	0.198922629704891	NA	0.251996020307941	NA	0.30574843936041
Gm27003	chr2	+	NA	0.97632751583019	0.391304	1.42194504394641	NA	0.654291456603438	0.153846	1.26103296254857	NA	0.380444302541867	0.590909	1.2503534132646	0.909091	0.726293387240454	0.1	1.25025723097731	NA	0.814035930913341	0.352941	1.48281599741144	NA	0.453334022058528	0.6	1.58040719659796
Gm27027	chr2	-	0.508621	0	0.485714	0	0.480952	0	0.43871	0.0532913891744941	0.490385	0	0.543103	0.026420035134242	0.460606	0	0.474576	0.0258175936428337	0.5	0	0.410959	0.0228351733868399	0.435065	0	0.385965	0.032635132819893
Gm27494	chr2	+	0.571429	0	0.538462	0	0.5	0	0.666667	0	0.5	0	NA	0	0.615385	0	0.368421	0	0.695652	0	0.375	0	0.625	0	0.846154	0
Gm28035	chr2	+	0.355649	0	0.375236	0	0.325095	0.00426279238020959	0.381391	0.00687833645079006	0.382609	0	0.405405	0.0102301268653353	0.361335	0.00293703774925148	0.366467	0.00666456994932989	0.372864	0.00280776071998397	0.42418	0.00589468609844333	0.445444	0.00295352903574915	0.405263	0
Gm28036	chr2	-	0.52085	0	0.528832	0	0.516387	0	0.52626	0	0.54224	0	0.520349	0	0.5288	0	0.50209	0	0.50763	0	0.515974	0	0.52537	0	0.50144	0
Gm28042	chr2	+	0.455696	0	0.457411	0	0.499569	0	0.434	0	0.500855	0	0.459278	0	0.486251	0	0.465732	0	0.472903	0	0.465359	0	0.470733	0	0.44114	0
Gm28045	chr2	+	0.844332	0	0.801661	0	0.823333	0	0.842557	0.00432498366149084	0.836022	0	0.853157	0	0.859551	0	0.818428	0	0.903226	0	0.762452	0	0.905172	0	0.743259	0
Gm28635	chr2	-	0.443414	0	0.46679	0	0.455882	0	0.432767	0	0.454824	0	0.448387	0	0.456376	0	0.429003	0	0.424242	0	0.468493	0	0.449519	0	0.449898	0
Gm29232	chr2	-	0.821429	0	0.65	0	0.636364	0	0.823529	0	0.55	0.0489719809280777	0.727273	0	0.766667	0	0.551724	0	0.702703	0	0.558824	0	NA	0	NA	0
Gm34653	chr2	+	0.985507	2.35302547616591	1	1.54595033536059	0.965517	1.36968812839874	1	2.76261864861111	0.969231	2.45263203306855	1	1.70020696687416	0.988095	2.44062078065251	1	2.15986951051989	0.957143	2.08432006639626	0.971014	1.87770795019499	0.938776	2.65067069368339	1	1.70346861258973
Gm37499	chr2	+	NA	0.306033915719055	NA	0.331744346078024	NA	0.0883028004095976	0.54386	0.62022106124358	NA	0.376371779818147	NA	0.382277702155145	NA	0.279148633278771	NA	0.39386305379388	NA	0.369500664916488	0.285714	0.438149068659395	0.363636	0.345496659326185	0.25	0.595389432917725
Gm4430	chr2	-	0.314394	1.21696864876421	0.381944	1.18899330417311	0.461538	1.56198198381055	0.345638	1.44091236832142	0.34375	1.42814703496724	0.287356	1.19624146345586	0.421911	1.58509486357391	0.396985	1.12163774204535	0.377315	1.61501756775244	0.358621	1.18880647295536	0.451163	1.66950010365112	0.405063	1.25031712110209
Gm9873	chr2	+	0.255319	1.65613063575016	0.394649	2.47970976804089	0.264605	1.95125640982899	0.427007	2.33460139364501	0.399002	1.68850784498969	0.292754	2.43163325570944	0.30916	1.92057667603147	0.492091	2.51107872217228	0.291045	1.49506140944228	0.380247	3.15712630849	0.265854	1.48990674553108	0.422383	2.83314196395003
Gmeb2	chr2	-	0.500942	5.89331109592287	0.480655	6.48842857663298	0.492462	3.96228773725283	0.486877	6.79084864449817	0.518453	5.76771727102929	0.529595	6.31033111021278	0.464534	5.58725032722392	0.49235	6.40143300658911	0.501784	6.19297447105738	0.542819	6.27296587925352	0.469529	6.00507520770594	0.450331	6.23439646163246
Gnas	chr2	+	0.551432	10.105851057211	0.524038	13.1848166250813	0.538908	10.6559611729083	0.517073	11.5118762102669	0.500494	10.1771140115365	0.549915	12.661115710765	0.525964	10.2350288482257	0.532178	11.7891404543107	0.538336	9.53560119292885	0.527027	11.6388363739884	0.538827	9.65914785033563	0.542828	11.9163718586697
Golga1	chr2	-	0.482143	2.58397916995072	0.512821	3.54547677385012	0.44	1.28369330459393	0.484962	3.82621751230664	0.491525	2.33842307352101	0.5	3.30111061996444	0.428571	2.27591281804648	0.490347	3.29679042941713	0.540284	2.220574471298	0.550162	3.64661697899023	0.539604	2.30441405183851	0.510417	3.76055344051915
Golga2	chr2	+	0.505952	9.18673228672509	0.5	8.71648618575396	0.585106	6.80584720552439	0.530055	10.41728932838	0.522727	8.46235830437183	0.469697	8.90753886372344	0.516854	8.39617923467747	0.590244	9.42594241559543	0.539749	9.04778736230245	0.528926	9.14556582657381	0.446429	9.34455130103475	0.487179	8.25709209234779
Gorasp2	chr2	+	0.470707	23.454556129096	0.457917	24.5479711265888	0.466147	32.3918907709683	0.470304	23.039005365934	0.477047	24.299613383426	0.504198	24.2559442418866	0.486148	25.3207487465756	0.470641	24.7011150757703	0.472435	23.8904441033082	0.465812	25.1323532659339	0.464531	21.5885244213526	0.458537	21.7360928569539
Gpat2	chr2	+	0.543478	2.33480669642192	0.497487	4.59349467963704	0.613208	3.22405628475531	0.569832	4.02093467691686	0.569106	2.45732008410341	0.476852	4.41581531674261	0.486301	2.83708235266946	0.56	3.6057884771251	0.540146	2.50392212024525	0.485714	3.6170202131734	0.434783	2.09093896784195	0.621849	3.72923450959373
Gpcpd1	chr2	-	0.407332	2.13026654023369	0.507426	2.10333493330002	0.668919	0.572531205761124	0.477823	1.87163979463764	0.42963	2.0493050693787	0.433715	2.1056068445566	0.459344	1.86647721465102	0.4514	2.04209408748142	0.46443	2.07000955314561	0.437299	2.03753718930623	0.439108	1.93706121942016	0.455927	2.57889186281561
Gpd2	chr2	+	0.581351	24.137573313027	0.619607	20.3422540483005	0.533782	9.19423196208965	0.601803	19.8119385171741	0.57719	21.2873326992061	0.609001	20.8313646391789	0.591546	19.4433513496691	0.577653	20.3347945799971	0.583032	23.9584725964296	0.590459	19.6584343041217	0.583532	24.223723991773	0.605961	20.1411093348886
Gpr107	chr2	+	0.586772	5.62914812458666	0.561937	6.05102362896716	0.590456	5.09592953943985	0.552311	6.35823755417039	0.596905	5.80146499178084	0.585402	6.00100075332127	0.580153	5.89109955030413	0.589579	6.12412897763433	0.584755	5.94125599420771	0.555605	5.98906710610711	0.600547	5.63591087228154	0.579065	5.49693896223599
Gpr155	chr2	-	1	0.227326735268741	NA	0.110129039936046	NA	0.0703261815826523	NA	0.150574704417797	NA	0.163325479139531	NA	0.153627025678778	0.619048	0.169590074008209	NA	0.158581640844026	0.5	0.156780583014479	0.791667	0.160834290532074	NA	0.153675489801977	NA	0.133638401351111
Gpsm1	chr2	+	0.452586	1.21255626331576	0.554688	1.48968187030143	0.590643	1.34913934072933	0.547619	1.73288589282992	0.550143	1.34017470824391	0.527675	1.37725292198677	0.637224	1.28795679947976	0.472414	1.35109515458935	0.515625	1.10305511345249	0.504065	1.47810978631564	0.585616	1.09753863222261	0.541667	1.28339190628094
Grb14	chr2	-	0.762887	0.300637075451678	0.454545	0.15255622740103	0.734177	0.266522713344022	0.8	0.184598850308893	0.659574	0.25303894112107	0.813953	0.205160673664565	0.691589	0.247730652098799	0.752941	0.196551478394294	0.573529	0.264980708282078	0.444444	0.196446054587886	0.619469	0.308353364157323	0.766667	0.236031270283332
Grin1	chr2	-	NA	0.0758431474635099	NA	0.22154280736243	NA	0.0595982321066499	0.7	0.150259741641486	NA	0.0734731173655995	1	0.178784650124912	NA	0.0692935013393505	1	0.202370010045936	NA	0.0441623131470634	0.921053	0.285872829387373	NA	0.0658113256421392	NA	0.276052850296105
Gsn	chr2	+	NA	0.525559036130321	0.818182	1.56697713268595	NA	0.829752469294456	0.636364	1.02954338658441	NA	0.700282263863522	NA	1.0482904216093	NA	0.749116736285169	NA	1.18989911631916	NA	0.633221637141928	0.785714	1.10783501929946	NA	0.828655278803461	0.764706	1.74725627323939
Gss	chr2	-	0.373109	19.2305026182553	0.354954	16.6780193489224	0.341737	34.3721972212802	0.39103	19.2496065706203	0.325231	20.4068107366811	0.371115	17.4764892120765	0.37674	22.0597871483109	0.367797	17.1734835565305	0.341515	20.9318870219939	0.375384	17.2802269538474	0.369929	22.9793257286576	0.39383	15.4581506705004
Gssos1	chr2	+	0.130435	0.480949948553221	0.0697674	0.866160857775016	NA	0.151388665703868	0.111111	0.977108040618378	0.0701754	0.609413896744654	0.115385	1.00920106273955	0.133333	0.451992060774473	0.0804598	1.22287412123333	0.0619469	0.781098640741239	0.101266	0.767593509880535	0.128571	0.699276874497481	0	0.872625164576607
Gssos2	chr2	+	0.111111	0.450308823051714	0.0909091	0.680467207451584	NA	0.0831563365124431	0.176471	0.737984553884766	0.129032	0.569066816354118	0.162791	0.631952647066	0.151515	0.315118126109564	0.170732	0.601291458846158	0.0759494	0.602495692723649	0.177778	0.40246664625183	0.150943	0.446523288444939	0	0.472477107027703
Gtf3c4	chr2	-	0.469481	15.6072703146614	0.500899	17.9195138394331	0.517766	6.90894875612208	0.490262	20.4818783654934	0.481774	13.8083917144988	0.491697	18.2595878921662	0.521441	12.3765803927753	0.527365	17.6146906681435	0.45683	14.7301030269798	0.489491	17.1468306276375	0.522613	13.8120433187914	0.517241	15.871218903202
Gtf3c5	chr2	-	0.504939	7.5620558158944	0.532503	7.93242199515817	0.503621	10.989976081958	0.523548	8.17617295055599	0.522383	8.43336173671704	0.523714	7.90092888849713	0.484068	8.72939403690488	0.508522	7.62166503977906	0.495417	9.01058073086656	0.535351	7.90812601438384	0.50771	8.254120077388	0.542318	7.55161944114841
Gtsf1l	chr2	-	0.42444	39.3413015426368	0.457944	22.844533151285	0.436157	80.9220916583731	0.44086	25.4622626918806	0.474856	44.660301848118	0.413013	26.0553615106007	0.435028	46.4573056334716	0.442922	30.5637907573708	0.452528	44.9046196677226	0.445386	30.1026201072913	0.462162	44.2817506126427	0.455696	26.3645024697232
Gyltl1b	chr2	-	0.514286	2.84253876488508	0.474083	3.6247957596203	0.371069	2.81957607534282	0.457048	4.20750444964754	0.452055	3.10977532343285	0.466847	3.42910510836492	0.504	3.02169508232679	0.451482	3.45494868526909	0.461749	2.86219000574509	0.471554	3.53946361138646	0.440767	2.52614220164961	0.478355	2.88705469658086
Gzf1	chr2	+	0.54867	9.08642648778277	0.578639	9.02701624835246	0.57221	5.56272100308386	0.532647	10.0057800678484	0.54924	9.08066679631134	0.562949	8.870769019363	0.544878	8.14688166980018	0.553559	9.90324096470657	0.530627	8.0996061160226	0.567161	9.51895844892345	0.553585	8.03028484291269	0.540978	8.18323036395058
H13	chr2	+	0.538043	1.34256909424015	0.478754	2.0049406827433	0.480469	2.24499644017226	0.474903	1.74232969669699	0.518868	1.34903365022136	0.493639	1.9618214337491	0.564103	1.41368645600627	0.473829	1.87734648991739	0.498382	1.34208560458742	0.546392	1.95854794020079	0.492701	1.3159534392136	0.409836	2.0294835467139
[truncated: 12,614 more rows]
