# Supplementary material for: Kinetics of Xist -induced gene silencing can be predicted from combinations of epigenetic and genomic features
Source: HighWire-hosted journal article supplement (doi:10.1101/gr.245027.118), 2019-06-07
Supplement: Supplemental_Table_S2.xlsx [file Supplemental_Table_S2.xlsx]

## Sheet: PRO-Seq genes
Supplemental Table 4: List of genes with computed half-times.
This table contains 280 genes for which we could measure half-times from the PRO-seq data. The genes are listed by gene name with corresponding genomic coordinates.
The column ‘start’ corresponds to the annotation of the gene’s active TSS (Supplemental Text 1), the column ‘end’ corresponds to the transcription termination of the corresponding isoform of the gene, as annotated in Genecode for M9 for mouse genome mm10.
The column 'half-time' reports the half-time of each gene computed from the exponential fit of the PRO-seq time series; the column ‘basal skewing’ reports the skwing in expression of the paternal allele at time point zero; the column ‘sqrtRSS’ reports the fitting error of the exponential decay function and the column ‘RPKM (t=0)’ the non-allele specific normalized expression of each gene at time …
The column ‘known escapee? (source)’ reports whether a gene was already annotated as escapee in the literature, and the corresponding reference number is reported in brackets while the column ‘known silenced? (source)’ indicates if the gene is mentioned specifically as silenced in the literature and the corresponding reference number is reported in brackets.
The references used for the escapees annotation are the following:
	[1] Yang et al., Genome Res 2010 (Yang et al. 2010): escapees are defined from allele-specific RNA sequencing data on mESCs.
	[2] Splinter et al., Genes Dev 2011 (Splinter et al. 2011): escapees are defined from mouse neuronal precursor cells (NPCs) during differentiation, combined with allele-specific chromosome conformation capture-on-ChIP (4C).
	[3] Calabrese et al., Cell 2012 (Calabrese et al. 2012): escapees are defined via allele-specific sequencing and chromatin states in mouse trophoblast stem cells.
	[4] Wu et al., Neuron 2014 (Wu et al. 2014): escapees are defined form several CNS cell populations in female mices using nuclear-localized fluorescent reporters.
	[5] Berletch et al., PLoS Genet 2015 (Berletch et al. 2015): escapees are defined using allele-specific expression and chromatin structure on the X-linked genes in three mouse somatic tissues: brain, spleen and ovary.
	[6] Marks et al., Genome Biol 2015 (Marks et al. 2015): escapees are defined from allele-specific RNA sequencing data on mESCs.
	[7] Andergassen et al., Elife 2017 (Andergassen et al. 2017): escapees are defined using allele-specific RNA sequencing on 19 female mouse cell lines: 16 epiblast-derived embryonic neonatal and adult tissues showing random XCI and three extra-embryonic tissues showing imprinted XCI. * random XCI, ** imprinted XCI
The column ‘validated by mRNA-seq’ indicates whether the gene was validated as silenced or not silenced from our mRNA-seq data on undifferentiated mESC.
The column ‘predicted by XCI/escape model’ reports for each gene the model’s predicted class over 500 different runs. This is done to check whether the predictions are robust to small variations of the same predictive model. ‘0’ refers to a gene predicted as ‘silenced’ and ‘1’ refers to a gene predicted as ‘not silenced’. A number between ‘0’ and ‘1’ indicates that the prediction is not really st…
The column ‘class probability’ reports for each gene the Random Forest model probability to belong to the silenced class (class ‘0’). Genes where this probability is higher than 0.50 are assigned to the ‘silenced’ class, while genes where this is lower than 0.50 are assigned to the ‘not silenced’ class (class ‘1’).
gene name	chromosome	start	end	strand	half-time	basal skewing	sqrtRSS	RPKM (t=0)	known escapee? (source)	known silenced? (source)	validated by mRNA-Seq (half-time)	predicted class by XCI/escape model	class probability
Cnksr2	chrX	157821435	158043294	-	0.0118097	0.780021	0.873196	0.546311	Yes (7*)		Yes (0.37)	0	0.941052
Stag2	chrX	42149316	42277185	+	0.0532211	0.67811	0.637308	4.91868	Yes (7*)			0	0.842612
Iqsec2	chrX	152144267	152225236	+	0.0565014	0.658403	0.572417	1.81496		Yes (1), proximal to ecapee	Yes (0.52)	0	0.981702
Rbm41	chrX	139889510	139998595	-	0.10142	0.568121	0.629604	3.25305	Yes (6,7*)	Yes (6), early inactivation in EBs, escapee in neuronal progenitor cells	Yes (0.49)	0	0.960216
Fmr1	chrX	68678540	68717963	+	0.116951	0.480839	0.51153	5.88223	Yes (5)	Yes (6), late inactivation in EBs, escapee in neuronal progenitor cells		0	0.75247
Fam122b	chrX	53243414	53269805	-	0.118276	0.493567	0.468753	9.48254			Yes (0.4)	0	0.71328
Gm14858	chrX	102252521	102365498	+	0.139171	0.668808	0.346889	1.05214				0	0.846092
Fundc1	chrX	17556563	17572325	-	0.147736	0.619166	0.775852	5.85923		Yes (1)		1	0.196396
Rbmx	chrX	57383529	57393036	-	0.156149	0.588639	0.606262	15.9371	Yes (7*)		Yes (0.48)	0	0.79446
4933407K13Rik	chrX	75706931	75764699	-	0.165352	0.699762	0.705839	4.87715	Yes (7*)		Yes (0.45)	0	0.603708
Fam199x	chrX	137049593	137082503	+	0.193644	0.400377	0.418438	4.10432	Yes (5,7*)		Yes (0.2)	0	0.917434
Pls3	chrX	75785653	75875182	-	0.198691	0.52369	0.449155	74.8031	Yes (7*)		Yes (0.45)	0	0.946752
Prdx4	chrX	155323917	155340754	-	0.200601	0.648288	0.811811	20.6845	Yes (7*)			0	0.725904
Stard8	chrX	99003247	99074728	+	0.221114	0.371783	0.235126	6.69818	Yes (7*)		Yes (0.4)	0	0.638032
Rlim	chrX	103957162	103981284	-	0.244643	0.506866	0.272845	14.2394	Yes (5)	Yes (3,6)	Yes (0.13)	0	0.555982
Med12	chrX	101274029	101297465	+	0.2496	0.609849	0.56575	15.1338	Yes (7*)		Yes (0.46)	0	0.901878
Prkx	chrX	77761410	77796278	-	0.250728	0.433333	0.429316	4.45199			Yes (0.91)	0	0.94743
Slc10a3	chrX	74369216	74373349	-	0.254842	0.673932	0.54508	20.9089	Yes (7*)		Yes (0.28)	0	0.64642
Nhsl2	chrX	101849384	102092055	+	0.268324	0.456828	0.363319	2.52871	Yes (7*)		Yes (0.28)	0	0.935086
Amer1	chrX	95420317	95444872	-	0.270998	0.527532	0.970535	8.28278	Yes (7*,**)		Yes (0.36)	0	0.680126
Prrg1	chrX	78449612	78583896	-	0.271679	0.593482	0.299807	1.26037	Yes (7*)		Yes (0.29)	0	0.956412
Slc25a53	chrX	136981115	137038302	-	0.282235	0.442808	0.205175	3.74282			Yes (0.23)	0	0.921754
Nr0b1	chrX	86191763	86195947	+	0.289	0.4135	0.76261	23.7783			Yes (0.23)	0	0.9609
Magt1	chrX	105968083	106011906	-	0.289209	0.567279	0.419017	7.01532	Yes (7*)		Yes (0.28)	0	0.960738
Cd99l2	chrX	71420059	71492849	-	0.293907	0.668335	0.23556	1.53036	Yes (7*)		Yes (0.53)	0	0.941366
Usp26	chrX	51753958	51801233	-	0.295021	0.469444	0.624409	1.52726			Yes (0.66)	0	0.759788
Ophn1	chrX	98554276	98891025	-	0.313848	0.657617	0.363048	1.17318	Yes (7*,**)	Yes (4)	Yes (0.48)	0	0.87776
Maged1	chrX	94535473	94542143	-	0.319825	0.55303	1.20245	19.5811			Yes (0.41)	0	0.98275
Platr21	chrX	139240225	139357738	-	0.324967	0.613934	0.487171	1.72551			Yes (0.35)	0	0.965754
Hdac8	chrX	102284638	102505359	-	0.328677	0.559459	0.473583	6.48398	Yes (7*)			0	0.815036
Klf8	chrX	153237465	153396132	+	0.328908	0.491715	0.285646	9.06232			Yes (0.23)	0	0.972268
Armcx4	chrX	134686518	134696757	+	0.330928	0.544065	0.537148	22.7817	Yes (7*,**)		Yes (0.21)	0.078	0.522384
Dlg3	chrX	100767721	100818410	+	0.335817	0.6794	0.788087	5.81693			Yes (0.23)	1	0.335302
Fmr1nb	chrX	68761838	68804567	+	0.338708	0.525501	0.488309	38.0652			Yes (0.72)	0	0.716458
Klhl15	chrX	94234598	94277724	+	0.347953	0.506433	0.587336	4.22437		Yes (1), proximal to ecapee	Yes (0.22)	0	0.984408
Eras	chrX	7924275	7928607	-	0.356055	0.368677	0.532251	5.0097				1	0.344276
Abcb7	chrX	104280656	104413856	-	0.362473	0.540026	0.247237	4.66687	Yes (7*)	Yes (3)	Yes (0.47)	0	0.8874
Chm	chrX	113040592	113185517	-	0.362609	0.539211	0.419526	6.45548	Yes (2,6)		Yes (0.9)	0	0.569906
Phka1	chrX	102513974	102644246	-	0.369665	0.466979	0.386905	3.59597	Yes (7*)		Yes (0.38)	0	0.870044
Pdk3	chrX	93764606	93832201	-	0.370637	0.540678	0.458892	8.42902		Yes (1)	Yes (0.46)	0	0.624842
Pfkfb1	chrX	150588228	150643878	+	0.371106	0.591458	0.605737	13.216	Yes (7*)		Yes (0.38)	0	0.857502
Armcx1	chrX	134717962	134721917	+	0.380318	0.552186	0.667929	27.079	Yes (7*,**)		Yes (0.22)	0	0.866266
Cdkl5	chrX	160771922	160994704	-	0.382012	0.528647	0.418027	1.9595	Yes (7*)		Yes (0.68)	0	0.573936
Hmgb3	chrX	71555917	71560676	+	0.386884	0.59499	0.725382	17.8598	Yes (7*)			0	0.972252
Fhl1	chrX	56731786	56793346	+	0.387227	0.652806	0.359623	6.04532	Yes (7*,**)		Yes (0.66)	0	0.716378
2210013O21Rik	chrX	153723589	153741920	+	0.389233	0.609654	0.488703	10.7262			Yes (0.69)	0	0.724174
Gk	chrX	85701936	85776819	-	0.389455	0.581138	0.43804	1.7512			Yes (0.3)	0.184	0.514038
Ddx26b	chrX	56454856	56507843	+	0.398422	0.557018	0.56126	11.7133	Yes (7**)		Yes (0.56)	0.068	0.522498
Tbl1x	chrX	77511012	77662983	+	0.398851	0.45418	0.390634	9.94459			Yes (0.33)	0	0.933168
C77370	chrX	104077433	104201185	-	0.400159	0.585162	0.572863	2.86496			Yes (0.27)	0	0.71516
Hsd17b10	chrX	152001844	152004442	+	0.401022	0.393056	1.12201	23.4241			Yes (0.71)	0	0.711788
Zfx	chrX	94074630	94123702	-	0.402468	0.495547	0.414222	7.03124		Yes (1), proximal to ecapee	Yes (0.47)	0	0.734874
Ccdc22	chrX	7593808	7605517	-	0.409977	0.517342	0.353532	0.447265				1	0.36031
Aifm1	chrX	48474943	48513563	-	0.415553	0.617969	0.575146	10.751	Yes(7*)		Yes (0.42)	0	0.80626
Cox7b	chrX	106015699	106022450	+	0.417233	0.444424	0.247575	32.5986	Yes (7*)			0.276	0.509142
Syn1	chrX	20860510	20921004	-	0.423813	0.618917	0.650307	3.95658				0	0.6134
Msn	chrX	96096041	96168552	+	0.42925	0.445985	0.528614	4.77911	Yes (7*)		Yes (0.66)	0	0.931454
4930519F16Rik	chrX	103182970	103311782	-	0.439928	0.502957	0.327092	7.24626			Yes (0.55)	0	0.702556
Renbp	chrX	73922120	73930850	-	0.452748	0.554188	0.552856	35.8932	Yes (7*)			1	0.318094
Tspyl2	chrX	152336851	152342425	-	0.457619	0.529321	0.504821	23.1012	Yes (7*)	Yes (1), proximal to ecapee	Yes (0.36)	0	0.65727
Elk1	chrX	20933394	20950608	-	0.459167	0.567827	0.333108	4.59385				0.286	0.50932
Gpc3	chrX	52272425	52613950	-	0.460409	0.507884	0.197964	7.85235	Yes (7**)		Yes (0.7)	0	0.901366
Fgd1	chrX	151046149	151089521	+	0.464649	0.607893	0.230891	13.6905			Yes (0.42)	0	0.829948
Tab3	chrX	85574021	85634469	+	0.467962	0.504782	0.657254	4.34836	Yes (7*)		Yes (0.36)	0	0.72919
Egfl6	chrX	166523006	166585720	-	0.472417	0.783214	0.41372	2.41139				0	0.757122
Mecp2	chrX	74026591	74135363	-	0.474183	0.534073	0.465968	15.4424	Yes (6,7*)	Yes (2,6), for (6): intermediate inactivation in EBs, escapee in neuronal progenitor cells	Yes (0.58)	1	0.288484
Mospd2	chrX	164936168	164980375	-	0.475123	0.554061	0.372356	12.9763	Yes (7*)			0	0.720992
Prps1	chrX	140456612	140476140	+	0.475351	0.465981	0.439803	101.285	Yes (7*)			0	0.96396
Kantr	chrX	152294827	152327495	-	0.477694	0.55725	0.322027	11.8272			Yes (0.44)	0	0.66092
Gpc4	chrX	52053020	52165252	-	0.477775	0.566376	0.301751	8.01547			Yes (0.4)	0	0.936918
A230072E10Rik	chrX	151291973	151344846	-	0.479495	0.326923	0.732258	1.44099				0	0.7214
Acot9	chrX	155262442	155297654	+	0.482456	0.531663	0.457348	10.0823			Yes (0.99)	0	0.95255
Firre	chrX	50555743	50635321	-	0.489558	0.488402	0.274196	25.3296	Yes (1,2,4,5,7*)			0	0.649918
Atp7a	chrX	106027275	106124926	+	0.494987	0.496715	0.554864	5.43904			Yes (0.53)	0	0.83264
Eda	chrX	99975605	100400762	+	0.495086	0.459193	0.419202	5.28842			Yes (0.76)	0	0.674314
Elf4	chrX	48411045	48463132	-	0.507988	0.648074	0.428248	4.92832	Yes (7*)		Yes (0.4)	0	0.924642
Pgk1	chrX	106187099	106203699	+	0.511295	0.493754	0.15413	27.2975	Yes (7*)	Yes (3,6)		0	0.580046
Dynlt3	chrX	9654266	9663003	-	0.512304	0.223189	0.787802	3.5695				0.974	0.47156
Slc25a14	chrX	48623412	48662294	+	0.514023	0.493192	0.789573	6.90109			Yes (0.68)	0	0.802316
Zic3	chrX	58022699	58041736	+	0.516017	0.50418	0.562451	19.8753			Yes (0.7)	0	0.884472
BC065397	chrX	136741823	136803364	+	0.516167	0.426251	0.411596	8.2596	Yes (7*)		Yes (0.33)	0.964	0.47007
Apex2	chrX	150519518	150589868	-	0.518405	0.545728	0.504325	6.22521	Yes (7*)		Yes (0.29)	0	0.667252
Pcyt1b	chrX	93654862	93749951	+	0.524909	0.415004	0.53302	5.14558			Yes (0.42)	0	0.948312
Kif4	chrX	100625736	100727214	+	0.527842	0.496551	0.335524	11.4295	Yes (5)		Yes (0.47)	0	0.701952
Gdi1	chrX	74304997	74311862	+	0.530775	0.375432	0.674882	29.1177	Yes (5)		Yes (0.46)	1	0.294952
Pdha1	chrX	160122208	160138413	-	0.531492	0.55495	0.299185	18.83	Yes (5,7*)		Yes (0.94)	0	0.768524
Gm8061	chrX	139358467	139359257	+	0.531571	0.590079	0.387055	34.7428				0	0.920778
Pir	chrX	164269370	164373011	+	0.534898	0.544798	0.202752	6.56435	Yes (7*)			0	0.843374
Rps4x	chrX	102184940	102189394	-	0.541856	0.645009	0.424396	76.5919	Yes (3,7*)			0	0.730242
Rbbp7	chrX	162760401	162779092	+	0.544945	0.347554	0.505952	41.7833			Yes (0.87)	0	0.689736
Slc9a6	chrX	56609756	56664230	+	0.548912	0.583602	0.309894	8.20452	Yes (7*)		Yes (0.96)	0.954	0.471012
Rps6ka6	chrX	111388191	111537959	-	0.556083	0.608387	0.719035	2.0848	Yes (7*)		Yes (0.57)	0	0.594268
1110012L19Rik	chrX	70385876	70389417	+	0.560664	0.53536	0.638491	13.8453	Yes (7*)			0	0.657504
Ofd1	chrX	166390032	166440704	-	0.561879	0.556778	0.398085	11.8535	Yes (6)	Yes (6), late inactivation in EBs, escapee in neuronal progenitor cells	Yes (0.86)	0	0.743342
Gspt2	chrX	94636068	94643244	+	0.562567	0.492322	0.50045	8.09973			Yes (0.38)	0	0.857896
Morf4l2	chrX	136732941	136743690	-	0.566716	0.343407	0.34702	29.5841			Yes (0.32)	0.012	0.538688
Zfp280c	chrX	48541624	48594504	-	0.571207	0.469252	0.762648	4.26459	Yes (7**)		Yes (0.45)	0	0.93803
Fam120c	chrX	151344174	151471842	+	0.577486	0.570733	0.373557	7.75054			Yes (0.66)	0	0.871592
Ubl4a	chrX	74365717	74373218	-	0.578779	0.613197	0.420397	43.5378			Yes (0.43)	1	0.240988
Smc1a	chrX	152016427	152062694	+	0.579497	0.465083	0.574189	11.1891		Yes (1), proximal to ecapee	Yes (0.95)	0	0.744976
Fam50a	chrX	74313032	74320149	+	0.582428	0.651765	0.489572	14.1952			Yes (0.85)	1	0.44687
Alg13	chrX	144317803	144374450	+	0.589564	0.546877	0.269753	28.6245	Yes (5)		Yes (0.65)	0	0.866684
Atrx	chrX	105797614	105929403	-	0.589571	0.502332	0.25278	12.2475		Yes (6)	Yes (0.78)	0	0.828912
Sh3kbp1	chrX	159627271	159978069	+	0.590704	0.509101	0.569018	0.597569			Yes (0.78)	0	0.935406
Ccdc160	chrX	52791199	52799468	+	0.598114	0.635714	0.947684	20.7425	Yes (7**)		Yes (0.28)	0	0.85346
Dmd	chrX	82948869	85206141	+	0.601803	0.483629	0.280102	1.94901	Yes (7*)		Yes (0.39)	0	0.677598
Magix	chrX	7673163	7681251	-	0.614959	0.425124	0.499174	27.0281	Yes (7*)			1	0.376272
Gprasp1	chrX	135742732	135803474	+	0.614984	0.443236	0.404766	7.72954	Yes (5,3,7*)		Yes (0.51)	0	0.666228
Ammecr1	chrX	142851145	142966728	-	0.616159	0.432965	0.439956	6.32397				0	0.758506
Tmsb15b2	chrX	136955264	136958025	-	0.620281	0.228961	0.65529	48.1346				0	0.61044
Phka2	chrX	160502165	160598878	+	0.620796	0.497582	0.251879	6.27423	Yes (7*)			0	0.749868
Usp11	chrX	20703905	20720539	+	0.621472	0.399094	0.320373	18.2462	Yes (6)	Yes (6), late inactivation in EBs, escapee in neuronal progenitor cells	Yes (0.88)	1	0.27365
Tfe3	chrX	7762559	7775202	+	0.622627	0.570286	0.482219	29.7597				0.544	0.497902
Bhlhb9	chrX	135797593	135891081	+	0.624619	0.457062	0.659029	8.24851	Yes (7*)		Yes (0.48)	0	0.667254
Mtm1	chrX	71210766	71315691	+	0.635213	0.522187	0.275423	4.56655	Yes (7*)		Yes (0.56)	0	0.773822
Vma21	chrX	71815923	71839757	+	0.639652	0.648493	0.581455	2.1575	Yes (7*)			0	0.71232
Tmsb15l	chrX	136954987	136976869	-	0.644892	0.320641	0.714746	0.165251	Yes (7*)		Yes (0.7)	0	0.675496
Zmat1	chrX	134971371	135009209	-	0.652532	0.393301	0.726201	5.35767				0	0.638836
Eda2r	chrX	97333839	97377216	-	0.655141	0.521239	0.529748	7.36652	Yes (6)	Yes (6), late inactivation in EBs, escapee in neuronal progenitor cells		0.788	0.48868
Igbp1	chrX	100494290	100516125	+	0.659526	0.521077	0.27003	8.95839				0	0.649596
Ercc6l	chrX	102141715	102157091	-	0.659909	0.540283	0.408231	20.0706	Yes (3,6)	Yes (6), intermediate inactivation in EBs, escapee in neuronal progenitor cells	Yes (0.39)	0	0.657662
Cenpi	chrX	134308083	134362639	+	0.660597	0.545818	0.456362	11.2542			Yes (0.79)	0.348	0.506142
Las1l	chrX	95935334	95956962	-	0.663246	0.51905	0.485837	10.6681	Yes (7*)	Yes (3)	Yes (0.76)	0	0.599348
Ccdc120	chrX	7731713	7750905	-	0.674523	0.458792	0.710032	7.3681			Yes (0.76)	1	0.396432
Tsix	chrX	103431516	103484957	+	0.685754	0.44881	0.416463	57.5555	Yes (7*,**)		Yes (0.09)	0	0.590408
Nono	chrX	101429317	101448591	+	0.68846	0.479048	0.299295	21.1234	Yes (7*)		Yes (0.51)	0	0.779442
Acsl4	chrX	142317992	142390535	-	0.703916	0.338576	0.705677	3.03925			Yes (0.5)	0	0.85788
Glod5	chrX	8004199	8018492	-	0.705811	0.332863	1.02653	8.21737				1	0.22949
Phf6	chrX	52912265	52956943	+	0.70899	0.422222	0.723049	1.76097	Yes (7*)		Yes (0.89)	0	0.910578
A230072C01Rik	chrX	20961683	20986737	+	0.709946	0.525041	0.611504	37.0256	Yes (6)	Yes (6), intermediate inactivation in EBs, escapee in neuronal progenitor cells		0	0.55302
Zdhhc15	chrX	104536968	104671064	-	0.712254	0.490784	0.959388	3.7007	Yes (7**)		Yes (0.22)	0	0.897916
Xiap	chrX	42059678	42109656	+	0.72253	0.534475	0.611898	12.9927			Yes (0.71)	0	0.762786
Atp11c	chrX	60223289	60592698	-	0.723444	0.459657	0.262264	2.86076				0	0.715854
Huwe1	chrX	151800806	151935417	+	0.727197	0.492887	0.320388	14.1161	Yes (5)	Yes (3,6)	Yes (0.98)	0	0.704596
Mpp1	chrX	75109732	75131016	-	0.731727	0.656258	0.482543	16.0776	Yes (7*)			0	0.616754
Chic1	chrX	103356475	103396092	+	0.7364	0.521355	0.392398	5.41572		Yes (6)	Yes (0.38)	0	0.5964
Ftx	chrX	103560906	103623754	-	0.740632	0.622602	0.850879	2.52844	Yes (5,6,7*)		Yes (0.22)	0.878	0.48094
Trappc2	chrX	166440573	166453140	+	0.744049	0.536942	1.27974	3.84716				0	0.716074
Ribc1	chrX	152004581	152016295	-	0.744215	0.509494	1.26371	22.6761			Yes (0.53)	0	0.786226
Htatsf1	chrX	57053582	57067183	+	0.747476	0.480905	0.836763	8.02224				0	0.704704
Tbc1d8b	chrX	139684995	139753405	+	0.754333	0.400025	0.726287	3.7046	Yes (7*)		Yes (0.32)	0	0.966402
Map7d2	chrX	159414571	159498757	+	0.758097	0.514536	0.55646	1.05249				0	0.935962
Gm15246	chrX	169320621	169368190	+	0.764291	0.538158	0.69723	5.07368				0.018	0.530028
Ikbkg	chrX	74393289	74453854	+	0.766819	0.518956	0.282704	9.49773			Yes (0.65)	1	0.248644
Syap1	chrX	162857056	162888447	-	0.766931	0.552846	0.453272	4.05056	Yes (3)			0	0.637798
Snx12	chrX	101097785	101222563	-	0.771172	0.480951	0.296254	10.8339	Yes (7*)		Yes (0.8)	0	0.933914
Pdzd4	chrX	73793358	73824969	-	0.781178	0.43081	0.553048	12.0776			Yes (0.69)	0	0.593464
Zfp449	chrX	56346399	56365674	+	0.78648	0.501298	0.907024	2.40693			Yes (0.72)	0	0.710478
5530601H04Rik	chrX	105037196	105079609	-	0.796922	0.493621	0.569046	9.96607	Yes (4,5,6)	Yes (6), intermediate inactivation in EBs, escapee in neuronal progenitor cells	Yes (0.73)	1	0.36423
Lamp2	chrX	38401356	38456454	-	0.797643	0.437057	0.424681	23.5484	Yes (5)	Yes (6)	Yes (0.73)	0	0.69707
Rbmx2	chrX	48695003	48710723	+	0.798811	0.601752	0.183855	10.9161			Yes (0.8)	0	0.660662
Nsdhl	chrX	72918556	72958514	+	0.801578	0.526273	0.353911	31.7744				0	0.549974
Mcf2	chrX	60055955	60179089	-	0.802383	0.516104	0.294559	14.3253			Yes (0.69)	0	0.928138
Tmsb15b1	chrX	136974021	136976874	-	0.8057	0.371103	0.815652	0			Yes (0.68)	0	0.675496
Reps2	chrX	162411953	162643649	-	0.809662	0.508621	1.29309	0.204097	Yes (7*)			0	0.789506
Cdk16	chrX	20687953	20699880	+	0.814125	0.516283	0.343169	25.5549	Yes (2,6,7*)	Yes (6), late inactivation in EBs, escapee in neuronal progenitor cells		1	0.333306
Zdhhc9	chrX	48171968	48208878	-	0.818903	0.542511	0.660652	5.09917			Yes (0.69)	0	0.942732
Slc7a3	chrX	101079209	101086020	-	0.827993	0.393524	0.668978	23.8145				0.01	0.538664
BC023829	chrX	70459752	70477180	-	0.828001	0.453769	0.484049	4.23299			Yes (0.57)	0	0.84621
Txlng	chrX	162778918	162829454	-	0.850565	0.422511	0.266484	8.36792			Yes (0.8)	0	0.813484
Rps6ka3	chrX	159210306	159368244	+	0.858486	0.489851	0.410735	6.5941			Yes (0.81)	0	0.7445
Uxt	chrX	20941721	20962017	-	0.858492	0.505158	0.231099	33.885	Yes (7*)			0	0.55302
Piga	chrX	164419786	164433916	+	0.858883	0.400485	0.156494	27.065		Yes (1)	Yes (0.92)	0	0.841564
Gnl3l	chrX	150983140	151017322	-	0.861422	0.480868	0.649094	20.3023			Yes (0.45)	0	0.917294
Gripap1	chrX	7789764	7820567	+	0.869443	0.436489	0.75787	3.20752	Yes (3,6)		Yes (0.65)	1	0.383272
Rp2	chrX	20364480	20405653	+	0.873332	0.57465	0.264731	3.90945				1	0.314532
Apoo	chrX	94367116	94417093	+	0.874817	0.457145	0.223146	16.5911	Yes (7*)			0	0.921062
Tceal8	chrX	136168983	136172342	-	0.894942	0.404023	1.45798	34.5411	Yes (7**)		Yes (0.28)	0	0.719856
Tmem164	chrX	142681405	142843494	+	0.911201	0.544736	0.757024	2.8577	Yes (5,7*)			0	0.95432
Tceanc	chrX	166499811	166518567	-	0.914439	0.541514	0.454258	7.12867				0	0.843422
Ctps2	chrX	162901237	163032508	+	0.92282	0.312161	0.580638	7.40833				0	0.696284
Zrsr2	chrX	163935442	163958661	-	0.926228	0.564844	0.441399	19.8244	Yes (3,6,7*)			0	0.763906
Abcd1	chrX	73716596	73738534	+	0.928579	0.476386	1.02453	12.7803				0	0.579788
Prickle3	chrX	7657259	7668186	+	0.933576	0.534034	0.603962	9.3765	Yes (7*)			1	0.309744
RP23-109E24.10	chrX	7722244	7730530	+	0.938428	0.564995	0.734845	0	Yes (7*)			0.004	0.542278
Irak1	chrX	74013913	74023918	-	0.95142	0.425757	0.349989	21.0743	Yes (7*)			1	0.273084
Rpl10	chrX	74270811	74273135	+	0.998578	0.52775	0.522758	186.347	Yes (7*)			1	0.319284
Taz	chrX	74281911	74290151	+	1.00714	0.618055	0.7808	12.8519	Yes (7*)			1	0.124534
Hprt	chrX	52988136	53021659	+	1.01275	0.548915	0.410682	26.3091	Yes (7*)	Yes (6)		0	0.642876
Diaph2	chrX	129749741	130465834	+	1.01407	0.465098	0.446226	4.24427				0	0.901266
Bcap31	chrX	73686177	73716175	-	1.0245	0.468658	0.407627	43.8022				0.002	0.546326
Pola1	chrX	93304766	93632155	-	1.0247	0.466326	0.412903	16.2303				0	0.707866
Gemin8	chrX	166170453	166190512	+	1.03102	0.545906	0.640722	2.64036				0	0.629956
Was	chrX	8081452	8090498	-	1.03349	0.393913	0.848427	3.25029				1	0.061346
Bcor	chrX	12036739	12160355	-	1.04111	0.424266	0.3862	7.88636				1	0.399366
Syp	chrX	7638470	7653256	+	1.04114	0.438316	0.41903	6.36471	Yes (5)			1	0.32567
Vbp1	chrX	75514298	75534942	+	1.04792	0.533193	0.463928	22.3595	Yes (2,6)	Yes (6), late inactivation in EBs, escapee in neuronal progenitor cells		0	0.94249
1700013H16Rik	chrX	53742900	53757831	-	1.05833	0.303077	0.998136	42.3181				0	0.87276
Clcn5	chrX	7153809	7319358	-	1.07043	0.445891	0.555264	3.76386				0.328	0.506644
Arhgap4	chrX	73891441	73921870	-	1.07766	0.567673	0.227368	4.06183				1	0.28439
Zfp182	chrX	21028938	21062316	-	1.09305	0.49699	0.514839	4.13513				0.528	0.49955
Gm14634	chrX	12762277	12821492	+	1.10803	0.623485	0.397875	4.73785				1	0.019208
Rbm3	chrX	8138974	8145880	-	1.11298	0.547869	0.382726	73.8716	Yes (6,7*)			1	0.268596
Rab9	chrX	166457252	166479867	-	1.11609	0.440603	0.270198	13.2463				0	0.773606
Sms	chrX	157443854	157492287	-	1.11719	0.526548	0.354478	3.80067	Yes (7*)			0	0.96239
Naa10	chrX	73916872	73921944	-	1.1341	0.472768	0.597982	25.8442	Yes (7*)			1	0.215362
Slc6a8	chrX	73673149	73682502	+	1.14136	0.457651	0.609937	33.5167				1	0.040282
Gm36995	chrX	7558601	7605381	-	1.14394	0.490114	0.331363	0.209821				1	0.378388
Praf2	chrX	7728438	7731064	+	1.14551	0.452564	1.29185	58.9132				0.24	0.511438
Mageb16	chrX	79623230	79671435	-	1.14973	0.569118	0.811724	1.51132				0	0.7013
Hccs	chrX	169250192	169320372	-	1.17049	0.498694	0.461304	5.60618				0.564	0.497518
Hdac6	chrX	7930119	7947889	-	1.17534	0.539751	0.357268	10.0221	Yes (3,6,7)			1	0.156504
Timm17b	chrX	7899356	7908351	+	1.17717	0.484466	0.796988	14.3126	Yes (6,7*)			1	0.127844
Mbtps2	chrX	157535370	157598715	-	1.17858	0.495814	0.508937	7.6618	Yes (7*)			0	0.947688
Shroom2	chrX	152609508	152769465	-	1.17999	0.451187	0.365048	5.83222	Yes (7*)			0	0.920462
Emd	chrX	74254686	74261548	+	1.20209	0.34155	0.736734	16.0985				1	0.329106
Utp14a	chrX	48256861	48282453	+	1.2152	0.536219	0.285125	17.1022	Yes (3,5,6,7*)			0	0.565602
Ocrl	chrX	47912386	47965868	+	1.22088	0.471622	0.491952	5.59395	Yes (7*)			0	0.666624
Gpkow	chrX	7697130	7710262	+	1.23176	0.417162	0.752567	13.7836				1	0.400092
Bcorl1	chrX	48341357	48408049	+	1.27338	0.449639	0.563975	5.01584				0	0.93802
Suv39h1	chrX	8061170	8074760	-	1.27781	0.56475	0.489676	17.34	Yes (2,3)			1	0.0572
Pdzd11	chrX	100622882	100626568	-	1.3009	0.31187	1.37828	20.318				0	0.816558
Zfp185	chrX	72987338	73031543	+	1.34417	0.512108	1.02939	2.96301				0	0.563766
Eif1ax	chrX	159372177	159389928	+	1.35085	0.437219	0.562516	12.2161	Yes (7*)			0	0.765256
Gm10489	chrX	10707175	10717242	-	1.37104	0.480287	0.951148	13.3989				1	0.095412
A830080D01Rik	chrX	159526687	159593081	+	1.38372	0.569628	0.204089	13.4129				0	0.7415
Yipf6	chrX	98936315	98949017	+	1.40181	0.44494	0.505203	10.5876	Yes (3)			0	0.829426
Gpr143	chrX	152781920	152808646	+	1.40426	0.524693	0.228811	20.1788				0	0.846064
Pin4	chrX	102119446	102127669	+	1.43571	0.472322	0.899734	9.47564				0	0.589786
Lage3	chrX	74351275	74353618	-	1.45182	0.44032	0.867549	30.0422				1	0.098168
Cask	chrX	13517079	13851367	-	1.47658	0.538058	0.354355	4.42167	Yes (7**)	Yes (1), proximal to ecapee		1	0.075046
Atp6ap1	chrX	74297096	74304721	+	1.4967	0.613587	0.863708	17.4734				1	0.269086
Eif2s3x	chrX	94188706	94212862	-	1.4997	0.445329	0.369451	4.92919	Yes (1,2,3,4,5,7*)			0	0.984822
Phf8	chrX	151520671	151633859	+	1.51261	0.586528	0.324396	12.5381				0	0.744444
Wdr45	chrX	7714332	7728206	+	1.53917	0.590902	1.09826	17.4685	Yes (6)			0.006	0.542278
Shroom4	chrX	6399853	6637448	+	1.55246	0.636411	0.744957	1.43703	Yes (1,7*)	Yes (6)		1	0.210238
Tmem47	chrX	81070697	81097872	+	1.55791	0.562049	0.489872	7.85828	Yes (5,7**)			0	0.91432
Rbm10	chrX	20617502	20650901	+	1.55908	0.481595	0.375246	15.9908				1	0.327838
Kdm5c	chrX	152233019	152274535	+	1.58683	0.564689	0.468068	16.9125	Yes (1,2,3,4,5,6,7*)	Yes (6), late inactivation in EBs, escapee in neuronal progenitor cells		0	0.914146
Flna	chrX	74223460	74249820	-	1.59598	0.398112	0.705094	8.42301				1	0.196046
Tspan7	chrX	10485157	10596605	+	1.63934	0.520588	1.17937	0.456483	Yes (7*)		Yes (1.72)	1	0.45111
Ogt	chrX	101640059	101684351	+	1.64425	0.484467	0.435793	29.5303	Yes (2,3,6,7*)	Yes (6), late inactivation in EBs, escapee in neuronal progenitor cells		0	0.741462
Prps2	chrX	167346321	167382749	-	1.65047	0.335884	0.814567	3.26617	Yes (7*)			0	0.850884
Uba1	chrX	20658325	20683179	+	1.65688	0.48851	0.205584	28.402	Yes (5,6)	Yes (6), late inactivation in EBs, escapee in neuronal progenitor cells	Yes (2.12)	0.998	0.455758
Enox2	chrX	49009706	49288259	-	1.69537	0.435893	0.826736	3.61515	Yes (7*)			0	0.594414
Med14	chrX	12675368	12762073	-	1.69692	0.545	0.521013	4.42257	Yes (6)	Yes (1,6), proximal to ecapee, late inactivation in EBs, escapee in neuronal progenitor cells		1	0.051534
Ppp1r3f	chrX	7557295	7574283	-	1.73463	0.487796	0.424584	11.3056			Yes (3.47)	1	0.328792
Brwd3	chrX	108737015	108834372	-	1.73465	0.480052	0.456752	3.37223	Yes (7*)			0.036	0.52735
Klhl13	chrX	23219270	23365082	-	1.73506	0.551724	0.235826	9.58477				1	0.352776
Jade3	chrX	20425687	20519939	+	1.76733	0.525057	0.400396	6.93267				1	0.34859
Cfp	chrX	20925453	20931555	-	1.82858	0.48344	1.39345	10.4264	Yes (5,7*)			0.92	0.477864
Msl3	chrX	168654116	168673898	-	1.88678	0.474564	0.585115	3.75075				0	0.78415
Usp9x	chrX	13071497	13173328	+	1.89387	0.553735	0.0918589	15.4861	Yes (2,3,5,6,7*)	Yes (1,6), proximal to ecapee, late inactivation in EBs, escapee in neuronal progenitor cells		1	0.428792
Cmc4	chrX	75404845	75416584	-	1.93931	0.570568	0.425651	0.579837	Yes (7*)		Yes (2.08)	1	0.070496
Ids	chrX	70343068	70365084	-	1.98375	0.430513	0.814404	3.72224	Yes (7*)			0	0.693424
Taf1	chrX	101532733	101601789	+	2.09324	0.530153	0.448116	13.6886	Yes (2,3,6,7**)			1	0.099116
G6pdx	chrX	74409482	74429194	-	2.34758	0.523216	1.2944	43.4784		Yes (6)		1	0.085702
Araf	chrX	20797813	20860519	+	2.60536	0.465985	0.515005	18.5703	Yes (6,7*)	Yes (6), late inactivation in EBs, escapee in neuronal progenitor cells	Yes (2.18)	1	0.132966
Kdm6a	chrX	18162574	18279936	+	2.70811		0.288888	7.48605	Yes (1,2,3,4,5,6)		Yes (3.47)	1	0.072974
Otud5	chrX	7841363	7876626	+	2.84378	0.461319	0.266872	25.1884	Yes (3)			1	0.115448
Ftsj1	chrX	8238667	8252406	-	2.9108	0.43896	0.78343	8.73133	Yes (6,7)		Yes (3.47)	1	0.009016
Dnase1l1	chrX	74273216	74282337	-	2.91685	0.428706	1.25955	11.8049				1	0.129268
Zmym3	chrX	101404383	101420849	-	2.98429	0.391535	1.48024	11.8146	Yes (7*)			1	0.169874
5730405O15Rik	chrX	13042014	13045297	+	3.02812	0.492476	1.20189	17.309				1	0.058618
Mtcp1	chrX	75410443	75416588	-	3.03824	0.557778	0.465031	1.69202	Yes (7*)			1	0.070496
Pbdc1	chrX	105079755	105117090	+	3.06642	0.565285	0.415964	8.158	Yes (1,2,3,5,6,7)			1	0.207484
Hcfc1	chrX	73942791	73966357	-	3.15658	0.501834	0.965668	18.9557	Yes (2,6)	Yes (6), late inactivation in EBs, escapee in neuronal progenitor cells		1	0.03769
2010308F09Rik	chrX	13234640	13247736	-	3.20135	0.508433	0.710471	0.678888				1	0.0183
Zfp275	chrX	73342620	73359080	+	3.25735	0.413101	0.653926	14.7018	Yes (7*)			1	0.064102
2810403D21Rik	chrX	108833799	108974906	+	3.34732	0.609213	0.839768	4.07379				1	0.26817
Gm26652	chrX	19224788	19237856	-	3.365	0.359523	0.867991	18.0893				1	0.064898
1810030O07Rik	chrX	12654878	12673668	-	3.46574	0.50447	0.759118	23.6207	Yes (1,5,6,7*)	Yes (6), late inactivation in EBs, escapee in neuronal progenitor cells		1	0.034154
Adgrg2	chrX	160390689	160498070	+	3.46574	0.22609	1.48256	0.118367	Yes (7*)			1	0.27598
Atp6ap2	chrX	12587800	12617049	+	3.46574	0.445924	0.303447	11.5453	Yes (7*)	Yes (1), proximal to ecapee	Yes (2.27)	1	0.021146
Brcc3	chrX	75416627	75454001	+	3.46574	0.502788	0.933903	5.56174	Yes (7*)			1	0.095856
Ddx3x	chrX	13280969	13294052	+	3.46574	0.38492	0.835414	38.8357	Yes (1,2,4,5,6,7)			1	0.025
Dkc1	chrX	75095853	75109777	+	3.46574	0.514702	1.12305	49.9457	Yes (7*)		Yes (3.47)	1	0.069494
Ebp	chrX	8185328	8193512	-	3.46574	0.479237	1.00379	24.9041	Yes (6)			1	0.009984
Fam3a	chrX	74384718	74393272	-	3.46574	0.44297	0.735213	23.9593	Yes (7*)			1	0.07646
Gm14817	chrX	73795214	73797616	+	3.46574	0.534188	1.08644	10.8813				1	0.041968
Gm14820	chrX	8042942	8074619	+	3.46574	0.342371	0.601592	60.9275			Yes (2.14)	1	0.189904
Idh3g	chrX	73778962	73786897	-	3.46574	0.403446	0.39888	70.0006	Yes (5,7*)		Yes (2.84)	1	0.045106
Mmgt1	chrX	56585511	56598069	-	3.46574	0.46855	1.38441	8.32229	Yes (5,6,7*)			1	0.270478
Nkap	chrX	37126794	37150746	+	3.46574	0.486179	1.34836	10.8533	Yes (2,3,6,7*)	Yes (6), late inactivation in EBs, escapee in neuronal progenitor cells	Yes (2.04)	1	0.073584
Rpgr	chrX	10073620	10216920	-	3.46574	0.425152	0.891495	2.55269	Yes (7*)		Yes (3.47)	1	0.033302
Slc35a2	chrX	7884027	7894492	+	3.46574	0.426656	1.25657	14.7177	Yes (6,7*)			1	0.088672
Slc9a7	chrX	20105754	20291807	-	3.46574	0.315809	0.890551	0.623036	Yes (7*)			1	0.109574
Tbc1d25	chrX	8154471	8176181	-	3.46574	0.418747	0.68101	14.235	Yes (7*)		Yes (2.04)	1	0.024748
Tmem29	chrX	150397772	150459154	-	3.46574	0.439111	1.41625	4.28635	Yes (5,7*)			1	0.224306
Upf3b	chrX	37091677	37110322	-	3.46574	0.509804	0.911671	9.21486				1	0.10195
