# Supplementary material for: Kinetics of Xist -induced gene silencing can be predicted from combinations of epigenetic and genomic features
Source: HighWire-hosted journal article supplement (doi:10.1101/gr.245027.118), 2019-06-07
Supplement: Supplemental_Table_S4.xlsx [file Supplemental_Table_S4.xlsx]

## Sheet: all_predictions
Supplemental Table 5: List of Random Forest predictions for genes without measured half-times.
Sheet 1 contains the list for all 263 genes without computed half-times for which we could retrieve the active TSS and predict the silencing class with the XCI/escape model.
The genes are listed by gene name with corresponding genomic coordinates. The column ‘start’ corresponds to the annotation of the gene’s active TSS (Supplemental Text 1), the column ‘end’ corresponds to the transcription termination of the corresponding isoform of the gene, as annotated in Genecode for M9 for mouse genome mm10.
The column 'biotype' states whether the gene is a protein-coding gene, pseudogene, processed pseudogene, miRNA, rRNA, scRNA, snoRNA, snRNA (annotation taken from Genecode for M9).
The column ‘predicted by XCI/escape model’ reports for each gene the model’s predicted class over 500 different runs. This is done to check whether the predictions are robust to small variations of the same predictive model. ‘0’ refers to a gene predicted as ‘silenced’ and ‘1’ refers to a gene predicted as ‘not silenced’. A number between ‘0’ and ‘1’ indicates that the prediction is not really st…
The column ‘number of SNPs’ gives the number of SNPs found in exons of the gene (exon annotation taken from Gencode for M9); the columns 'RPKM NoDoxA' and 'RPKM NoDoxB' specify the non-allele specific normalized expression of each gene at time point zero before doxycycline induction for both replicates.
The column ‘known escapee? (source)’ reports whether a gene was already annotated as escapee in the literature, and the corresponding reference number is reported in brackets while the column ‘known silenced? (source)’ indicates if the gene is mentioned specifically as silenced in the literature and the corresponding reference number is reported in brackets.
The references used for the escapees annotation are the following:
	[1] Yang et al., Genome Res 2010 (Yang et al. 2010): escapees are defined from allele-specific RNA sequencing data on mESCs.
	[2] Splinter et al., Genes Dev 2011 (Splinter et al. 2011): escapees are defined from mouse neuronal precursor cells (NPCs) during differentiation, combined with allele-specific chromosome conformation capture-on-ChIP (4C).
	[3] Calabrese et al., Cell 2012 (Calabrese et al. 2012): escapees are defined via allele-specific sequencing and chromatin states in mouse trophoblast stem cells.
	[4] Wu et al., Neuron 2014 (Wu et al. 2014): escapees are defined form several CNS cell populations in female mices using nuclear-localized fluorescent reporters.
	[5] Berletch et al., PLoS Genet 2015 (Berletch et al. 2015): escapees are defined using allele-specific expression and chromatin structure on the X-linked genes in three mouse somatic tissues: brain, spleen and ovary.
	[6] Marks et al., Genome Biol 2015 (Marks et al. 2015): escapees are defined from allele-specific RNA sequencing data on mESCs.
	[7] Andergassen et al., Elife 2017 (Andergassen et al. 2017): escapees are defined using allele-specific RNA sequencing on 19 female mouse cell lines: 16 epiblast-derived embryonic neonatal and adult tissues showing random XCI and three extra-embryonic tissues showing imprinted XCI. * random XCI, ** imprinted XCI
The last two columns 'validated by mRNA-seq' and 'validated by pyrosequencing' indicate whether the predicted class was validated as silenced or not silenced from our mRNA-seq data on undifferentiated mESC or by the pyrosequencing experiment (in brackets the corresponding half-time is given for each validated gene).
Predicted classes marked in red are not reliable because the predicted class is unstable, meaning that different Random Forest models yielded different predictions.
Sheet 2 contains a list of candidate genes for experimental validation. Those genes were confidently predicted as silenced (class 0) or not silenced (class 1) and were selected based on having a prediction probability higher than 80% for the respective class, expression at time point 0 higher than 1.0 RPKM and at least one SNP falling into exonic regions (Supplemental Text 2).
Filtering Criteria:
high confidence predictions “silenced” (probability class 0 > 0.8)
low confidence predicted “silenced” (probability class 0 > 0.65)
unstable prediction (0 < predicted class < 1)
low confidence predicted “not silenced” (probability class 0 < 0.35)
high confodence predictions “not silenced” (probability class 0 < 0.2)
genes expressed at time point 0 (RPKM > 1 for both replicates)
number of SNPs (SNP overlapping with any of genes exons) > 1
gene name	start	end	strand	bio type	gene length	predicted by XCI/escape model	class probability	number of SNPs	RPKM NoDoxA	RPKM NoDoxB	known escapee? (source)	known silenced? (source)	validated by mRNA-seq (half-time)	validated by pyrosequencing (half-time)
Cxx1c	53608032	53608432	+	protein_coding	400	0	0.983488	1	3.67738	6.22361			Yes (0.36)
AW822252	53716537	53716773	-	transcribed_unprocessed_pseudogene	236	0	0.980602	25	1.29958	2.41905
Prrg3	71962625	71970110	+	protein_coding	7485	0	0.972796	17	2.60428	3.40059	Yes (7*)		Yes (0.42)
Gm14601	53974554	53974789	-	transcribed_processed_pseudogene	235	0	0.969942	4	0	0
Gm15482	53969437	53975000	-	processed_transcript	5563	0	0.969942	13	1.51945	1.71795
Rnf128	139610620	139673145	+	protein_coding	62525	0	0.968452	17	5.25032	3.26325	Yes (3,5,7*)		Yes (0.42)	Yes (0.45)
Trap1a	139333683	139338169	+	protein_coding	4486	0	0.964778	1	57.0616	94.5877
Amot	145475720	145505181	-	protein_coding	29461	0	0.958808	87	0.219387	0.314505	Yes (7*)		Yes (0.41)
Arhgef9	95051926	95166307	-	protein_coding	114381	0	0.957844	76	0.50409	0.535293
Gm15046	140178698	140277862	-	protein_coding	13018	0	0.95411	25	1.16738	1.39459
Taf9b	106206883	106219901	-	lincRNA	99164	0	0.95396	1	0.602382	0		Yes (6)		Yes (0.63)
Gm715	60548019	60548849	+	processed_pseudogene	830	0	0.943062	6	0.887263	2.47323
Nrk	138914431	139010532	+	protein_coding	96101	0	0.94102	104	0.226825	0.159396	Yes (7*)
Ripply1	139779549	139782926	-	protein_coding	3377	0	0.939998	3	5.30334	2.71524			Yes (0.31)	Yes (0.49)
Irs4	141710998	141725263	-	protein_coding	14265	0	0.939182	7	0.507632	0.279893
Gm364	57409154	57488767	+	protein_coding	79613	0	0.938918	8	0.683966	0.544728			Yes (0.54)
Foxo4	101254528	101260873	+	protein_coding	6345	0	0.935478	11	10.79	14.1539			Yes (0.94)	Yes (0.87)
Cited1	102247714	102250946	-	protein_coding	3232	0	0.935418	5	5.60483	4.68702
Hs6st2	51679992	51680565	-	protein_coding	573	0	0.934658	13	0.0944429	0.150433		Yes (1)	Yes (0.47)
Mbnl3	51117269	51205832	-	protein_coding	88563	0	0.933358	3	0.140553	0.16791
Sat1	155215455	155216327	-	protein_coding	872	0	0.93218	9	18.2513	15.9823	Yes (7*)		Yes (0.57)	Yes (0.83)
9530027J09Rik	48276792	48285426	-	lincRNA	8634	0	0.93097	14	0	0.435879
Gm14705	69356596	69360626	-	antisense	4030	0	0.927634	8	0.0644732	0
Rgag4	102066544	102071196	-	protein_coding	4652	0	0.923938	27	0.464597	0.493355
Stk26	50841441	50893097	+	protein_coding	51656	0	0.922756	10	0.536212	0.557026
Aff2	69360700	69785176	+	protein_coding	424476	0	0.922392	23	0.169101	0.383828	Yes (7**)
Tro	150653386	150657372	-	protein_coding	3986	0	0.920258	6	1.71798	2.57551
Morc4	139858910	139871199	-	protein_coding	12289	0	0.919124	29	1.54344	1.67402			Yes (0.67)
Foxr2	153118786	153132861	+	protein_coding	14075	0	0.916848	19	0.458958	0.319835
Ptchd1	155573541	155623118	-	protein_coding	49577	0	0.916608	10	0.817876	0.683946
Gm14662	60893653	60898067	+	antisense	4414	0	0.91552	1	1.33936	1.40004
Nxf2	134944528	134963896	-	protein_coding	19368	0	0.914076	21	0.143558	0.457334			Yes (0.69)
Fgf13	59062145	59134436	-	processed_pseudogene	1550	0	0.913824	3	1.90152	2.27163
Gm650	155304199	155305749	-	protein_coding	72291	0	0.913652	21	0.519796	1.09583	Yes (7*)
Gm15201	162735078	162736613	-	processed_transcript	1535	0	0.909672	4	10.6637	12.9818
Xpnpep2	48108929	48136670	+	protein_coding	27741	0	0.90743	20	3.47648	4.57446
Gm28730	53051194	53052615	-	lincRNA	1421	0	0.906374	0	7.39889	8.26253
Ldoc1	61709497	61710955	+	protein_coding	1458	0	0.905492	5	1.76875	1.40868			Yes (0.74)
3010001F23Rik	152369028	152416698	+	processed_transcript	47670	0	0.899826	0	0.270674	0.242518
Esx1	137115397	137120171	-	protein_coding	4774	0	0.898044	23	0.68098	0.961437			Yes (0.36)
C430049B03Rik	53055207	53057160	-	processed_transcript	1953	0	0.891112	7	4.12164	3.46494	Yes (7*)
Gpr173	152343598	152368704	-	protein_coding	25106	0	0.886448	11	1.99638	0.97697			Yes (0.22)
Nxt2	142228177	142239692	+	protein_coding	11515	0	0.885572	37	3.4049	3.88273			Yes (0.58)	Yes (0.83)
Gm14812	99405331	99443797	-	lincRNA	38466	0	0.882486	6	0.136997	0.409153
Pcdh19	133582875	133687264	-	protein_coding	104389	0	0.881038	3	4.18075	3.73183	Yes (7**)
Gm43337	42489691	42491524	+	protein_coding	1833	0	0.875118	1	0.603039	0.640367			Yes (0.21)
2610002M06Rik	107782751	107816126	-	protein_coding	33375	0	0.869066	35	0.42662	0.30116	Yes (7*)		Yes (0.35)
Armcx2	134807260	134807942	-	protein_coding	682	0	0.8686	51	2.03364	1.814	Yes (7*,7**)		Yes (0.26)
Efnb1	99136130	99148991	+	protein_coding	12861	0	0.866304	8	6.22973	4.93316			Yes (0.22)
Apln	48025146	48034853	-	protein_coding	9707	0	0.865422	9	1.17071	0.60605	Yes (7**)		Yes (0.41)
Armcx6	134748463	134751417	-	protein_coding	2954	0	0.865166	5	0.988624	1.29915			Yes (0.72)
Kis2	52742565	52744960	-	processed_transcript	2395	0	0.863266	19	69.3571	48.3388
Mir20b	52742113	52745000	-	miRNA	2887	0	0.863266	1	33.7936	73.402
Hmgn5	109004534	109013404	-	protein_coding	8870	0	0.858966	2	2.09681	1.59405		Yes (1)	Yes (0.82)
Gm37564	42147988	42150181	-	TEC	2193	0	0.856408	0	2.97905	4.89347
Siah1b	164071885	164076493	-	protein_coding	4608	0	0.838522	12	45.2341	28.1969	Yes (3,6)		Yes (0.65)
Gm14597	53577087	53608126	-	protein_coding	31039	0	0.833886	2	0	0
Gm15226	166618102	166621542	-	lincRNA	3440	0	0.833102	47	23.4521	28.1156
Ar	98150626	98323215	+	protein_coding	172589	0	0.831544	18	0.121589	0.322788
Uprt	104482818	104507490	+	protein_coding	24672	0	0.830706	6	8.00038	5.47967			Yes (0.22)
Ubqln2	153498227	153501570	+	protein_coding	3343	0	0.82247	3	44.8328	35.384		Yes (1)	Yes (0.4)
Nup62cl	140028209	140062580	-	protein_coding	34371	0	0.820718	1	12.2116	7.7542			Yes (0.96)
Cul4b	38533570	38564662	-	protein_coding	31092	0	0.82049	4	34.6162	29.8308	Yes (7*)
Rap2c	51003912	51018018	-	protein_coding	14106	0	0.8198	0	3.9171	4.14116			Yes (0.84)
Lpar4	106920625	106933900	+	protein_coding	13275	0	0.815364	18	0.927878	1.24704	Yes (7**)		Yes (0.32)
Gm14856	106176314	106176926	+	processed_pseudogene	612	0	0.810488	1	13.0303	9.10042
Gabre	72255999	72274803	-	protein_coding	18804	0	0.807034	5	1.27141	1.30189
Pak3	143664391	143716145	+	protein_coding	51754	0	0.799204	167	0.218704	0.153689
Slitrk4	64264885	64276850	-	protein_coding	11965	0	0.798248	43	0.18272	0.0503731	Yes (7*)
Fancb	164980592	164997269	+	protein_coding	16677	0	0.791304	38	9.51614	12.0573	Yes (7*)		Yes (0.76)
Rragb	153139987	153153187	+	protein_coding	13200	0	0.78719	4	11.4287	12.6779			Yes (0.31)
8030474K03Rik	101794656	101798638	+	protein_coding	3982	0	0.786324	15	0.858484	0.219767			Yes (0.39)
Arhgap6	169036750	169304435	+	protein_coding	267685	0	0.784566	84	0.283708	0.351032	Yes (7*)
C1galt1c1	38630785	38635087	-	protein_coding	4302	0	0.783878	0	4.15556	6.18016
4933416I08Rik	53687450	53690919	+	unprocessed_pseudogene	3469	0	0.777382	2	0	0.208825			Yes (0.28)
Gm4779	101790053	101794476	-	antisense	4423	0	0.777364	5	0.39355	0.470149
Gm20489	101261405	101268176	-	protein_coding	6771	0	0.77685	3	0	0			Yes (0.31)
Il2rg	101266666	101268190	-	protein_coding	1524	0	0.774396	12	0.154444	0.43051			Yes (0.6)
Zbtb33	38189834	38194068	+	protein_coding	4234	0	0.772254	3	9.45276	7.56663			Yes (0.3)
Igsf1	49782536	49797749	-	protein_coding	15213	0	0.76701	21	0.0852191	0.127257	Yes (7*)
Glra2	165129017	165327393	-	protein_coding	198376	0	0.764594	8	0	0
Tsr2	151089692	151096523	-	protein_coding	6831	0	0.762092	22	21.7674	28.512			Yes (0.57)
Ap1s2	163909017	163933666	+	protein_coding	24649	0	0.760434	27	7.99439	11.2358	Yes (3,7* )
RP23-106P7.5	153721157	153723881	-	antisense	2724	0	0.758102	6	3.1567	4.57921
Psmd10	140948429	140956728	-	protein_coding	8299	0	0.753096	14	8.95085	7.59504			Yes (0.65)
Maged2	150806421	150813707	-	protein_coding	7286	0	0.752032	53	9.63662	7.84103	Yes (7*,7**)		Yes (0.46)
Lonrf3	36329216	36341754	+	protein_coding	12538	0	0.749836	0	1.77301	2.23364
Tceal5	136200948	136203876	-	protein_coding	2928	0	0.748916	3	2.04323	2.78963	Yes (7*)
9530051G07Rik	153037629	153072915	+	processed_transcript	35286	0	0.747932	49	1.1136	1.19731
Pih1h3b	140062879	140106797	+	protein_coding	43918	0	0.746292	0	0.244306	0.194571
Fmr1os	68667514	68678399	-	lincRNA	10885	0	0.743842	17	14.3807	9.25888
Smim10l2a	56374586	56377799	+	protein_coding	135751	0	0.742404	9	0.989192	0.506454			Yes (0.85)
Map3k15	159987600	160123351	+	protein_coding	3213	0	0.742316	7	10.2704	8.15919
Gm2155	56371620	56374790	-	antisense	3170	0	0.741794	6	0.622522	0.669319
Gm15157	155184500	155186380	+	processed_pseudogene	1880	0	0.73802	1	0.175051	1.04561
Cdx4	103321398	103330592	+	protein_coding	9194	0	0.737852	5	0.626011	0.598285
Gdpd2	100729942	100738894	+	protein_coding	8952	0	0.737826	25	0.426595	0.859993	Yes (7*)
Hnrnph2	134601271	134606384	+	protein_coding	5113	0	0.73098	1	12.6289	15.6582
Kctd12b	153685154	153696280	-	protein_coding	11126	0	0.729832	48	1.45279	1.13709	Yes (7**)
Gm7598	38476461	38482486	+	lincRNA	6025	0	0.722642	8	2.67571	2.58541
Gm15067	144268049	144268204	-	processed_pseudogene	155	0	0.72138	5	1.57546	3.76421
2310010G23Rik	36814771	36817185	+	antisense	69054	0	0.715824	4	0	0
Gm14798	94030250	94099304	-	lincRNA	2414	0	0.71449	1	16.5053	17.9907
Il13ra1	36112110	36171259	+	protein_coding	59149	0	0.713498	1	2.35046	1.3842
Jpx	103493558	103506425	+	lincRNA	12867	0	0.711514	40	0.128407	0.21476	Yes (6,7*,7**)
Klhl34	157818435	157820369	+	protein_coding	1934	0	0.711184	2	10.9232	11.9871
Car5b	163976822	164027997	-	protein_coding	51175	0	0.707326	75	0.522178	0.43898	Yes (1,5)
Gm7851	52782694	52783016	-	processed_pseudogene	322	0	0.703334	8	1.14136	2.72701
4930502E18Rik	53724826	53738441	+	protein_coding	13615	0	0.700698	5	26.5234	17.7976	Yes (7**)		Yes (0.83)
Trmt2b	134262488	134276984	-	protein_coding	14496	0	0.699606	8	2.61741	2.96893	Yes (6,7*)
Nap1l3	122394565	122397401	-	protein_coding	2836	0	0.699548	13	1.99251	0.776194
4933402E13Rik	62288150	62292078	+	protein_coding	3928	0	0.696362	14	0.182053	0.724958
Gm15229	166482220	166483926	-	processed_pseudogene	1706	0	0.695452	2	0.263704	0.10501
Hdx	111569931	111697079	-	protein_coding	127148	0	0.69289	0	0.425345	0.52353
Dach2	113298257	113835893	+	protein_coding	537636	0	0.691186	0	3.07588	3.07949
Mtmr1	71364760	71419196	+	protein_coding	54436	0	0.690206	31	3.37679	3.00674	Yes (7*)		Yes (0.91)
Mageh1	153036166	153037575	-	protein_coding	1409	0	0.689704	8	22.4855	19.5739			Yes (0.26)
Gm14902	100740100	100749421	+	lincRNA	9321	0	0.687426	8	0	0
Gm14866	100736983	100740100	-	processed_transcript	3117	0	0.685606	12	0.0580198	0.138625
Gm16459	162844838	162845523	+	processed_pseudogene	685	0	0.685036	7	14.5099	12.626
Thoc2	41860125	41911886	-	protein_coding	51761	0	0.68491	0	3.69647	4.72889
S100g	162961992	162964599	-	protein_coding	2607	0	0.678804	4	0	0.917525	Yes (7*)
Mum1l1	139217166	139238335	+	protein_coding	21169	0	0.677512	87	2.68078	3.02128
Gm14790	93981069	93982469	-	processed_pseudogene	1400	0	0.673094	11	0	0.567688
1700080O16Rik	51968695	51972772	-	protein_coding	4077	0	0.667994	12	1.64265	1.02791
Spin4	95022510	95026682	-	protein_coding	4172	0	0.661174	11	4.38773	4.99549
Pnma3	73064787	73068191	+	protein_coding	39514	0	0.66022	0	0.611898	0.655375
Cldn34c1	123103568	123143082	+	protein_coding	3404	0	0.658086	8	0.613527	0.474257
Tmsb15a	135718667	135725261	-	protein_coding	6594	0	0.655486	3	2.60997	1.03932
Armcx5	135742733	135747322	+	protein_coding	4589	0	0.65198	14	3.993	4.14798			Yes (0.52)
Gm15165	93988318	93988819	-	processed_pseudogene	501	0	0.64976	5	2.93751	3.50926
Tceal1	136707982	136711478	+	protein_coding	1145	0	0.64722	5	7.45146	12.9755
Ngfrap1	136270775	136271920	+	protein_coding	3496	0	0.645968	15	1.09602	1.4141	Yes (7*)		Yes (0.35)
Gm5124	21360940	21363022	+	transcribed_processed_pseudogene	2082	0	0.643988	20	1.34448	0.428312
Gm23786	162748556	162748674	+	snoRNA	118	0	0.638678	2	3.04676	1.21326			Yes (0.66)
Yy2	157566119	157568376	-	protein_coding	2257	0	0.638466	2	0	0
Mid1	169879664	169990571	+	protein_coding	110907	0	0.635058	197	5.21168	7.07805	Yes (1,2,3,4,6,7*,7**)		Yes (0.82)
Zc3h12b	95711678	95924758	-	processed_pseudogene	639	0	0.63301	6	0.43927	2.09908
Gm5637	60045111	60045750	+	protein_coding	213080	0	0.632538	12	0.810876	0.438658	Yes (7*)
AU015836	93968682	93969658	+	protein_coding	976	0	0.621498	25	3.68473	6.73494	Yes (5)		Yes (0.71)
Gm14808	99459300	99460753	+	antisense	1453	0	0.61657	3	5.78687	4.06659
Lrch2	147470387	147554050	-	protein_coding	83663	0	0.612754	77	0.421104	1.12047	Yes (7*)		Yes (0.54)
Usp51	153006469	153009416	+	protein_coding	2947	0	0.6092	2	10.2591	7.79314
Mospd1	53344598	53370502	-	protein_coding	25904	0	0.60678	9	30.3531	17.3208	Yes (7*)		Yes (0.28)
Gm8097	140445554	140446382	-	processed_pseudogene	828	0	0.6044	13	5.78112	5.31257
Arxes1	136032650	136034946	+	protein_coding	2296	0	0.60243	5	4.58878	4.83153			Yes (0.49)
Plac1	53069996	53114530	-	protein_coding	44534	0	0.599732	14	0.0880903	0.105236			Yes (0.43)
Gprasp2	135839034	135844730	+	protein_coding	5696	0	0.599646	14	2.6526	2.94255
Xlr3b	73192207	73202930	+	protein_coding	10723	0	0.59461	2	0.715209	3.22348
Fundc2	75382422	75387475	+	protein_coding	5053	0	0.58793	4	0.352994	0.632549
Scml2	161162772	161258213	+	protein_coding	95441	0	0.586198	41	0.687304	0.579585			Yes (0.74)
Wbp5	136245683	136247139	+	protein_coding	1456	0	0.58499	5	10.7836	9.90963	Yes (7*)		Yes (0.47)
Dusp9	73639419	73643514	+	protein_coding	4095	0	0.579244	3	12.4601	13.3752			Yes (0.86)
Sash3	48146436	48161565	+	protein_coding	1447	0	0.574866	0	3.08316	7.19112	Yes (7*)
Bex4	136138996	136140443	-	protein_coding	19310	0	0.574654	12	2.55899	1.95132			Yes (0.49)
Zc4h2	95639199	95658509	+	protein_coding	15129	0	0.574562	12	1.74436	2.63227	Yes (7*)
Cldn34-ps	77674836	77675435	-	processed_pseudogene	599	0	0.572484	2	0.20481	0.489347
Cypt3	153558593	153559429	+	protein_coding	836	0	0.57018	4	3.27696	3.4798
Gm1720	166661276	166689812	-	processed_pseudogene	432	0	0.565756	6	62.4363	56.6196
Gm15173	157612689	157613121	+	lincRNA	28536	0	0.565718	18	0.490562	0.586044
Tsc22d3	140539537	140543101	-	protein_coding	3564	0	0.561922	34	13.1916	9.29996	Yes (7*)		Yes (0.37)
Pgrmc1	36598206	36606079	+	protein_coding	7873	0	0.558208	1	119.908	110.834
Gm10344	134745495	134746913	-	TEC	1418	0	0.557548	7	0.519602	0.413824
Pja1	99466146	99470672	-	snoRNA	70	0	0.555878	1	12.1155	14.4736
Snord61	57391449	57391519	-	protein_coding	4526	0	0.555562	11	7.4678	6.97805			Yes (0.36)
Otud6a	100429013	100429885	+	protein_coding	872	0	0.553068	1	6.89738	7.06274
5730416F02Rik	109001485	109002296	+	processed_pseudogene	811	0.002	0.548132	3	3.17808	1.44635	Yes (5)
Akap17b	36611879	36645096	-	protein_coding	33217	0	0.54584	6	4.50356	4.54865
Magee2	104854952	104857267	-	protein_coding	2315	0	0.545704	7	6.52632	4.12015
Gm9103	102178194	102178657	+	protein_coding	75921	0.004	0.543588	7	0.074786	0.119123
Gria3	41402740	41478661	-	processed_pseudogene	463	0.002	0.542522	3	15.1711	21.7488
Cstf2	134059334	134086819	+	protein_coding	27485	0.008	0.539234	4	7.42938	9.14727	Yes (7*)
Rab33a	48519285	48530232	-	protein_coding	2222	0.014	0.534642	4	35.584	39.9401	Yes (5,7*)
Tmsb4x	167207093	167209315	+	protein_coding	10947	0.012	0.534464	2	9.23236	7.47965
Nxf3	136072099	136085255	-	protein_coding	13156	0.012	0.532564	19	2.01584	1.2041
Tmem28	99821021	99848790	+	protein_coding	27769	0.04	0.527088	5	1.25747	1.53977
3632454L22Rik	135022734	135036148	-	processed_transcript	13414	0.084	0.522492	41	0.823565	0.655908
Slc25a5	36795654	36797643	+	protein_coding	1989	0.068	0.520606	0	25.1595	25.3295
Tceal7	136214779	136225387	+	protein_coding	10608	0.12	0.518836	8	0.403898	0.241256	Yes (7*)
F8a	73228291	73230795	+	protein_coding	2504	0.152	0.516156	5	51.7543	28.892
Gm7212	48302876	48303776	-	processed_pseudogene	900	0.204	0.512172	2	1.05936	1.26555
Bex1	136214544	136215380	-	protein_coding	836	0.4	0.503598	3	31.1877	22.2806	Yes (7*)
Gm26618	6027056	6092269	-	sense_overlapping	65213	0.75	0.489598	3	1.48353	0.590761
Gm14809	99409571	99418895	-	lincRNA	9324	0.752	0.489438	2	0	1.05614
Apool	112311366	112372430	+	protein_coding	61064	0.858	0.48186	0	1.69206	2.10562
B230119M05Rik	134684562	134686462	-	processed_transcript	1900	0.886	0.480658	0	4.89535	4.64855
Dock11	35888832	36076562	+	protein_coding	187730	0.912	0.479398	4	2.20769	3.0187
Nkrf	36887540	36902899	-	antisense	13992	0.938	0.476688	2	1.32543	1.131
Gm14717	76246984	76260976	-	protein_coding	15359	0.94	0.476472	0	5.4148	6.4238
Gm15138	151169700	151171764	+	lincRNA	2064	0.944	0.47358	1	18.4815	15.8812
Zfp300	21079174	21089229	-	protein_coding	10055	0.986	0.465906	22	2.62439	2.75017
Gm20455	73097187	73104886	+	processed_transcript	7699	0.99	0.463512	1	2.6996	2.19303
Chst7	20059560	20097521	+	protein_coding	37961	0.998	0.458436	6	3.50943	3.79322
Xk	9272756	9313250	+	protein_coding	40494	0.996	0.458148	24	2.20304	1.67743	Yes (7*)
Xlr3c	73254540	73265390	-	protein_coding	10850	0.998	0.454558	0	3.49108	6.11684
Slc25a43	36743711	36776285	+	protein_coding	32574	1	0.442378	0	19.8827	10.8866
Gm19200	103287167	103288970	-	processed_pseudogene	1803	1	0.44152	7	10.8032	18.9188
C330007P06Rik	36848550	36874111	-	protein_coding	25561	1	0.441246	0	2.2677	3.50004
Lancl3	9200800	9268085	+	protein_coding	67285	1	0.439454	8	0.277117	0.29427	Yes (7*)
Xlr3a	73090951	73096878	-	protein_coding	5927	1	0.436334	5	10.3595	15.6422
Itm2a	107397099	107403376	-	protein_coding	6277	1	0.423018	6	1.12739	1.17847	Yes (4)
Xlr4b	73213900	73222453	+	protein_coding	8553	1	0.41513	1	0.720035	0.802835	Yes (7*)
Ndufb11	20615326	20617619	-	protein_coding	2293	1	0.41199	4	14.3457	14.2277	Yes (6,7*)		Yes (2.13)
B630019K06Rik	8893326	8894964	+	protein_coding	1638	1	0.40697	6	5.18566	4.60361			Yes (3.47)
Wdr44	23693159	23757029	+	protein_coding	63870	1	0.406838	0	5.2079	4.5695
Plxna3	74329066	74344689	+	protein_coding	15623	1	0.392066	38	4.6784	4.37804
Gm3880	102686292	102687029	-	protein_coding	83151	1	0.385348	3	0.220946	0.431918
Smarca1	47809368	47892519	-	unprocessed_pseudogene	737	1	0.383768	3	3.55722	5.7949
Gm14826	94317560	94318460	-	processed_pseudogene	900	1	0.369694	2	0.409165	0.651738
Gm27321	103622150	103623755	+	misc_RNA	1605	1	0.36071	2	0	0.716117
Timm8a1	134537256	134541865	-	protein_coding	4609	1	0.345382	0	12.7988	18.2859
Xist	103460506	103483217	-	lincRNA	22711	1	0.339698	65	0.191977	0.122862	Yes (7*,7**)
Smt3h2-ps	7750850	7752414	+	processed_pseudogene	1564	1	0.339078	6	0.862357	2.06041
F8	75338282	75382615	-	protein_coding	44333	1	0.3363	75	0.434226	0.578027	Yes (3,7*)
Cetn2	72913532	72918411	-	protein_coding	4879	1	0.335048	4	8.43627	5.88643
Gjb1	101383736	101385629	+	protein_coding	1893	1	0.33338	3	1.58377	1.03201
Timp1	20870221	20874735	+	protein_coding	4514	1	0.328024	6	30.0296	34.5519	Yes (7*)
Gm14703	7651106	7657258	-	antisense	6152	1	0.325766	5	9.31772	8.63079
Plp2	7667941	7671390	-	protein_coding	3449	1	0.32473	16	17.0419	19.5885	Yes (7*,7**)
Gm14379	7375925	7378042	+	processed_transcript	2117	1	0.304362	4	6.28171	5.47193
Usp27x	7372591	7375830	-	protein_coding	3239	1	0.304362	31	6.92436	7.79157
Gm9516	103336830	103337253	+	processed_pseudogene	423	1	0.300072	2	28.9825	22.1591
Gm26992	103422010	103481705	+	protein_coding	59695	1	0.297892	0	0	0
Gm14843	101479348	101479559	+	processed_pseudogene	211	1	0.292888	5	10.4337	24.929
Atp2b3	73503086	73571005	+	protein_coding	67919	1	0.28954	27	1.24926	1.12692	Yes (7*)
Tsx	103413750	103424580	+	protein_coding	10830	1	0.280768	7	0	0.180793		Yes (6)
Zcchc13	103630800	103631670	+	protein_coding	870	1	0.252772	1	0.453036	0
Rbm3os	8145917	8147676	+	antisense	1759	1	0.249226	4	11.5166	13.9093	Yes (6)
Drp2	134423830	134453400	+	protein_coding	29570	1	0.242906	47	0.387925	0.755218		Yes (2)
Ppp1r3fos	7573600	7581015	+	antisense	7415	1	0.242592	19	3.57887	3.82324
Bmp15	6314107	6320721	-	protein_coding	6614	1	0.22023	3	0.441747	0.431777	Yes (5)
Gm8545	74006702	74007502	+	processed_pseudogene	800	1	0.213366	6	21.3248	27.3081
Porcn	8193849	8206491	-	processed_transcript	33037	1	0.205424	6	6.67605	7.32629			Yes (2.57)
2010204K13Rik	7412106	7445143	-	protein_coding	12642	1	0.20498	8	1.92521	1.85952	Yes (7*)
Haus7	73437315	73459044	-	protein_coding	21729	1	0.204584	4	15.0403	12.2507	Yes (7*)		Yes (3.47)
Maoa	16619698	16687818	+	protein_coding	68120	1	0.18845	10	9.9972	5.10837	Yes (7*)			Yes (2.01)
Gm6184	101518985	101520245	+	processed_pseudogene	1260	1	0.17823	10	5.06746	5.82094
Gm14514	17251300	17254394	+	processed_pseudogene	3094	1	0.174392	2	1.17657	0.312349
Gata1	7962440	7978071	-	protein_coding	15631	1	0.169504	18	0.45364	0.60215
Itgb1bp2	101451526	101453144	+	protein_coding	1618	1	0.168434	11	58.6765	74.9117	Yes (7*)
Kcnd1	7822289	7838280	+	protein_coding	15991	1	0.165792	13	6.13616	6.0532
Ndufa1	37187588	37191163	+	protein_coding	2060	1	0.147652	6	21.0599	21.0095	Yes (3)
Pim2	7878262	7880322	-	protein_coding	3575	1	0.147486	0	15.8373	12.6132
Cybb	9457018	9486300	-	protein_coding	29282	1	0.142146	22	0.0634741	0.101105	Yes (5,7*)
Pqbp1	7894583	7898979	-	protein_coding	4396	1	0.140818	11	11.4173	11.5756	Yes (7*)		Yes (2.12)	Yes (3.01)
Gab3	74988704	75084757	-	protein_coding	96053	1	0.126304	6	0.189493	0.301833	Yes (7*)
Xlr5a	73107635	73292500	-	protein_coding	184865	1	0.123284	0	0	0.079655
Gm9	37209348	37211041	-	protein_coding	1693	1	0.115074	0	1.3537	1.43749
Gm5639	73297850	73299995	+	processed_pseudogene	2145	1	0.114782	4	0.306831	0.30546
Psmb6-ps	7950156	7950868	-	processed_pseudogene	712	1	0.106726	2	8.61752	6.58868
Ssr4	73787028	73790824	+	protein_coding	3796	1	0.104258	28	19.0521	18.1134			Yes (3.47)
Gm14635	12340637	12345222	-	lincRNA	4585	1	0.084592	20	0.228412	0.181913
Rpl22-ps1	8038611	8038996	-	processed_pseudogene	385	1	0.081568	2	0.955072	0.760643
Mid1ip1	10717390	10719690	+	protein_coding	2300	1	0.075766	0	25.2355	20.834
Wdr13	8123324	8132770	-	protein_coding	9446	1	0.066824	48	5.9382	6.62107	Yes (6,7*)		Yes (3.47)	Yes (2.06)
Gm6787	8097087	8106701	+	processed_transcript	9614	1	0.061696	4	7.77545	10.0966
Trex2	73433705	73435344	-	protein_coding	1639	1	0.052252	2	0.604159	4.6192
Srpk3	73774405	73778925	+	protein_coding	4520	1	0.049296	11	0.13242	0.316388	Yes (7*)
Pnck	73655995	73660117	-	protein_coding	4122	1	0.048626	6	3.67847	4.46892
Gm16481	13239200	13239553	+	processed_pseudogene	353	1	0.045562	9	1.90288	1.31609
AA414768	12936872	12938128	+	processed_pseudogene	1256	1	0.04433	2	32.4567	36.2047
n-R5s3	13215698	13215809	-	rRNA	111	1	0.036422	2	20.8467	17.0398
Nyx	13466110	13489313	+	protein_coding	23203	1	0.031088	13	0.331932	0.651455

## Sheet: candidates
Legend:			Selection criteria:				Known escapee references:
class 0: silenced class			1) high confidence predictions (probability > 0.8)				[1] F. Yang et al., Genome Res 2010
class 1: not silenced class			2) expressed at t=0 (RPKM > 1 for both replicates)				[2] E. Splinter et al., Gene Dev 2011
			3) at least one SNP				[3] J.M. Calabrese et al., Cell 2012
							[4] H. Wu et al., Neuron 2014
							[5] J.B. Berletch et al., Hum Genet 2015
							[6] H. Marks et al., Genome Biol 2015
							[7] D. Andergassen et al., Elife 2017		* random XCI, ** imprinted XCI
Genes pedicted as silenced
gene name	start	end	strand	bio type	gene length	predicted class	probability class 0	number of SNPs	RPKM NoDoxA	RPKM NoDoxB	known escapee? (source)	known silenced? (source)
AW822252	53716537	53716773	-	transcribed_unprocessed_pseudogene	236	0	0.980602	25	1.29958	2.41905
Prrg3	71962625	71970110	+	protein_coding	7485	0	0.972796	17	2.60428	3.40059	Yes (7*)
Gm15482	53969437	53975000	-	processed_transcript	5563	0	0.969942	13	1.51945	1.71795
Rnf128	139610620	139673145	+	protein_coding	62525	0	0.968452	17	5.25032	3.26325	Yes (3,5,7*)
Taf9b	106206883	106219901	-	protein_coding	13018	0	0.95411	25	1.16738	1.39459
Ripply1	139779549	139782926	-	protein_coding	3377	0	0.939998	3	5.30334	2.71524
Foxo4	101254528	101260873	+	protein_coding	6345	0	0.935478	11	10.79	14.1539
Cited1	102247714	102250946	-	protein_coding	3232	0	0.935418	5	5.60483	4.68702
Sat1	155215455	155216327	-	protein_coding	872	0	0.93218	9	18.2513	15.9823	Yes (7*)
Tro	150653386	150657372	-	protein_coding	3986	0	0.920258	6	1.71798	2.57551
Morc4	139858910	139871199	-	protein_coding	12289	0	0.919124	29	1.54344	1.67402
Gm650	155304199	155305749	-	processed_pseudogene	1550	0	0.913824	3	1.90152	2.27163
Gm15201	162735078	162736613	-	processed_transcript	1535	0	0.909672	4	10.6637	12.9818
Xpnpep2	48108929	48136670	+	protein_coding	27741	0	0.90743	20	3.47648	4.57446
Ldoc1	61709497	61710955	+	protein_coding	1458	0	0.905492	5	1.76875	1.40868
C430049B03Rik	53055207	53057160	-	processed_transcript	1953	0	0.891112	7	4.12164	3.46494	Yes (7*)
Nxt2	142228177	142239692	+	protein_coding	11515	0	0.885572	37	3.4049	3.88273
Pcdh19	133582875	133687264	-	protein_coding	104389	0	0.881038	3	4.18075	3.73183	Yes (7**)
Armcx2	134807260	134807942	-	protein_coding	682	0	0.8686	51	2.03364	1.814	Yes (7*,7**)
Efnb1	99136130	99148991	+	protein_coding	12861	0	0.866304	8	6.22973	4.93316
Kis2	52742565	52744960	-	processed_transcript	2395	0	0.863266	19	69.3571	48.3388
Hmgn5	109004534	109013404	-	protein_coding	8870	0	0.858966	2	2.09681	1.59405		Yes (1)
Siah1b	164071885	164076493	-	protein_coding	4608	0	0.838522	12	45.2341	28.1969	Yes (3,6)	Yes (1)
Gm15226	166618102	166621542	-	lincR	3440	0	0.833102	47	23.4521	28.1156
Uprt	104482818	104507490	+	protein_coding	24672	0	0.830706	6	8.00038	5.47967
Ubqln2	153498227	153501570	+	protein_coding	3343	0	0.82247	3	44.8328	35.384
Cul4b	38533570	38564662	-	protein_coding	31092	0	0.82049	4	34.6162	29.8308	Yes (7*)
Gabre	72255999	72274803	-	protein_coding	18804	0	0.807034	5	1.27141	1.30189
Genes predicted as not silenced
Maoa	16619698	16687818	+	protein_coding	68120	1	0.18845	10	9.9972	5.10837	Yes (7*)
Gm6184	101518985	101520245	+	processed_pseudogene	1260	1	0.17823	10	5.06746	5.82094
Itgb1bp2	101451526	101453144	+	protein_coding	1618	1	0.168434	11	58.6765	74.9117	Yes (7*)
Kcnd1	7822289	7838280	+	protein_coding	15991	1	0.165792	13	6.13616	6.0532
Pim2	7878262	7880322	+	protein_coding	2060	1	0.147652	6	21.0599	21.0095	Yes (3)
Pqbp1	7894583	7898979	-	protein_coding	4396	1	0.140818	11	11.4173	11.5756	Yes (3,7*)
Psmb6-ps	7950156	7950868	-	processed_pseudogene	712	1	0.106726	2	8.61752	6.58868
Ssr4	73787028	73790824	+	protein_coding	3796	1	0.104258	28	19.0521	18.1134
Wdr13	8123324	8132770	-	protein_coding	9446	1	0.066824	48	5.9382	6.62107	Yes (6,7*)
Gm6787	8097087	8106701	+	processed_transcript	9614	1	0.061696	4	7.77545	10.0966
Pnck	73655995	73660117	-	protein_coding	4122	1	0.048626	6	3.67847	4.46892
Gm16481	13239200	13239553	+	processed_pseudogene	353	1	0.045562	9	1.90288	1.31609
AA414768	12936872	12938128	+	processed_pseudogene	1256	1	0.04433	2	32.4567	36.2047
n-R5s3	13215698	13215809	-	rRNA	111	1	0.036422	2	20.8467	17.0398
