# Supplementary material for: Kinetics of Xist -induced gene silencing can be predicted from combinations of epigenetic and genomic features
Source: HighWire-hosted journal article supplement (doi:10.1101/gr.245027.118), 2019-06-07
Supplement: Supplemental_Table_S6.xlsx [file Supplemental_Table_S6.xlsx]

## Sheet: Blatt1
Supplemental Table 7: List of Primer used for Pyrosequencing experiment
This table contains the forward and reverse Primers used for the validation of 11 candidate genes (six predicted as silenced, 5 predicted as not silenced by the XCI/escape model) with Pyrosequencing.
Gene	Forward Primer		Reverse Primer		Sequencing Primer		Sequence to analyze	Dispension order	SNP ID	Polymerase	Annealing Temp	Predicted category
Maoa	ID056	Biotin-TTAGGGCTCTGTGTGATAACATGA	ID057	TCAGATGGGAAAGAAAAAAATACA	ID058	GGACCCACAACTCTACTAAG	ATAG/TAGAACCCAGTACAGATATATAAAAT	GATCAGTAGA	rs33768369	GoTaq	58°C	not silenced
Kcnd1	ID062	TGCAAAGGAGTTACAGCAGAGAA	ID063	Biotin-GTGGGCAGAGGACTGAACTGTT	ID064	TGTTCCTGACCCCTG	G/AGAGAGATAGAAGATATCGCCTCCTT	CAGAGAGA	rs229175664	GoTaq	58°C	not silenced
Pim2	ID065	Biotin-TACGCAGCACCTCCTCCATG	ID066	AGGCTGCGTGGGGGTCAC	ID067	GTCACAGGGGGCGAA	GGAA/TGCCCCTGCAGAGGCTTGGTCAACAT	CGATGCCTGC	rs25442933	GoTaq	59,5°C	not silenced
Pqbp1	ID068	TGTCCCGATCTCTCTCTCTATCCA	ID069	Biotin-GTAGTCATGAGAAGCCAGACAGGA	ID070	CTATCCACTTTGTCGTAG	TTG/ACGCTCTCGTTCTCTGTCATTCTTCT	CTAGCGCT	rs33379492	GoTaq	58°C	not silenced
Wdr13	ID074	GGCCCTTTGCTTTTCTTCCTA	ID075	Biotin-GGCACATTTAAGGTAGGTGACACT	ID076	TTCATCACACGGGGT	T/CAGACCCCAACAAATCTGTCTTGAAC	GCTAGACCAC	rs245024526	GoTaq	58°C	not silenced
Rnf128	ID022	CCGTTTTCCACAAACTCACCATA	ID023	Biotin-ACACACAGAGCCCAAGCTAAAGTA	ID024	AACATTCAGAACCGTCTA	T/CGAGTAGTCAGGTTTTTCATTTACAA	GCTGAGTA	rs13473063	HotStar	55°C	silenced
Taf9b	ID044	Biotin-CTGTAACAAAACCTTCCAGATGTA	ID045	GGACTCAATAGCCTAAGTCTTCAT	ID046	AGTTTTATCTTAGAAACGTA	GTA/GGTAATATTTTTCACATTAGTTACAT	TGCTAGTAT	rs29094496	HotStar	55°C	silenced
Ripply1	ID047	AATTGATGGTGGCCTGGA	ID048	Biotin-GCTCTACTGGCCCAAGTC	ID049	CTGTAGAGGTAGTCAAAGGA	GT/CGGGACT TGGGCCAGTA GAGC	AGCTGACT	rs29255213	HotStar	55°C	silenced
Foxo4	ID050	Biotin-AAGAATGTGTTTCCCCCCTTG	ID051	ATCCATACGTGGGGTCGAA	ID052	GCCACAGTCCCTCAC	CA/GTGCCTCCCCCAAGGGGGGAAACACA	TCAGTGCT	rs237931231	GoTaq	58°C	silenced
Sat1	ID053	CGACACTTCATGGCAACCTAGTA	ID054	Biotin-AAGAGGGTGAAATGTTCTCTCTGG	ID055	CTTCATGGCAACCTAGTA	T/CAAGCCAGAGAGAACATTTCACCCTC	GCTAGCAG	rs29300676	HotStar	55°C	silenced
Nxt2	ES320	Biotin-AACTTTGTCTCCGAATCTGAGAAT	ES321	GGGGCTTGAAGTTGATATGG	ES322	GACTGAGCATAGCTTTCTT	TCG/TAATTCTCAGATTCGGAGACAAAGTT	GTACGTATC	rs29288238	HotStar	55°C	silenced
