# Supplementary material for: Kinetics of Xist -induced gene silencing can be predicted from combinations of epigenetic and genomic features
Source: HighWire-hosted journal article supplement (doi:10.1101/gr.245027.118), 2019-06-07
Supplement: Supplemental_Table_S7.xlsx [file Supplemental_Table_S7.xlsx]

## Sheet: model_features
Supplemental Table 8: Metadata of Random forest features.
Sheet 1 lists all ChIP-seq, BS-seq and genomic data used for the Random Forest model with its source and a description of the feature. For ChIP-seq data the enrichment region (upstream and downstream of the TSS) is given.
Sheet 2 contains information about the filtering of ChIP-seq data and the reason why certain libraries were discarded.
ChiP-Seq data
name	source/reference	GEO Accession number	enrichment region start (wrt TSS)	enrichment region end (wrt TSS)	binsize for normalization with normR
5fC	Raiber et al., Genome Biol 2012, PMID: 22902005	GSE40148	-500	500	1000
5hmC	Pastor et al., Nature 2011, PMID: 21552279	GSE28682	-500	500	1000
BRG1	Ho et al., PNAS 2009, PMID: 19279218	GSE14344	-500	500	1000
CBX3	Sridharan et al., Nat Cell Biol 2013, PMID: 23748610	GSE44242	-250	250	500
CBX7	Morey et al., Cell Rep 2013, PMID: 23273917	GSE42466	-500	500	1000
CDK9	Newmann et al., Cell 2013, PMID: 23582322	GSE44286	-500	500	150
CMYC	Chen et al., Cell 2008, PMID: 18555785	GSE11431	-500	500	500
CTCF	Handoko et al., Nat Genet 2011, PMID: 21685913	GSE28247	-500	500	500
E2F1	Chen et al., Cell 2008, PMID: 18555785	GSE11431	-750	750	150
ESRRB	Chen et al., Cell 2008, PMID: 18555785	GSE11431	-500	500	1000
EZH2	Kaneko et al., Nat Struct Mol Biol 2013, PMID: 24141703	GSE49431	-500	500	500
H2Aub1	Brookes et al., Cell Stem Cell 2012, PMID: 22305566	GSE34518	-500	500	1000
H2AZ	Surface et al., Cell Rep 2016, PMID: 26804911	GSE53208	-500	500	150
H3K27ac	Mouse ENCODE	GSE31039	-750	750	500
H3K27me3	Wamstadt et al., Cell 2012, PMID: 22981692	GSE47949	-1000	1000	1000
H3K36me3	Ballare' et al., Nat Struct Mol Biol 2012, PMID: 23104054	GSE41589	0	gene end	1000
H3K4me1	Wamstadt et al., Cell 2012, PMID: 22981692	GSE47949	-1000	1000	1000
H3K4me3	Mouse ENCODE	GSE32218	-1000	1000	1000
H3K79me2	Marson et al., Cell 2008, PMID: 18692474	GSE11724	0	3000 or gene end	1000
H3K9ac	Mouse ENCODE	GSE31039	-1000	1000	500
HCFC1	Mouse ENCODE	GSE36030	-500	500	150
HDAC1	Whyte et al., Nature 2012, PMID: 22297846	GSE27841	-250	250	150
HDAC2	Whyte et al., Nature 2012, PMID: 22297846	GSE27841	-250	250	150
HDAC3	Żylicz et al., Cell 2019, PMID: 30595450	GSE116480	-500	500	1000
KDM2A	Farcas et al., Elife 2012, PMID: 23256043	GSE40860	-500	500	500
KDM2B	Farcas et al., Elife 2012, PMID: 23256044	GSE40860	-750	750	500
KLF4	Chen et al., Cell 2008, PMID: 18555785	GSE11431	-250	250	150
LSD1	Whyte et al., Nature 2012, PMID: 22297846	GSE27841	-750	750	150
MAFK	Mouse ENCODE	GSE36030	-500	500	500
MAX	Krepeplova et al., PLoS One 2014, PMID: 25486446	GSE48175	-500	500	500
MED1	Kagey et al., Nature 2010, PMID: 20720539	GSE22562	-500	500	150
MED12	Kagey et al., Nature 2010, PMID: 20720540	GSE22562	-500	500	150
MLL2	Hu et al., Nat Struct Nol Biol 2013, PMID: 23934151	GSE48172	-500	500	500
NANOG	Newmann et al., Cell 2013, PMID: 23582322	GSE44286	-500	500	500
NIPBL	Kagey et al., Nature 2010, PMID: 20720540	GSE22562	-500	500	150
NMYC	Chen et al., Cell 2008, PMID: 18555785	GSE11431	-500	500	150
OCT4	Newmann et al., Cell 2013, PMID: 23582322	GSE44286	-500	500	500
OGT	Vella et al., Mol Cell 2013, PMID: 23352454	GSE39154	-500	500	150
RING1B	Brookes et al., Cell Stem Cell 2012, PMID: 22305566	GSE34518	-500	500	1000
RNAPII	Hendoko et al., Nat Genet 20122, PMID: 21685913	GSE28247	-500	500	150
RNAPII_8WG16	Brookes et al., Cell Stem Cell 2012, PMID: 22305566	GSE34518	-500	500	150
RNAPII_S2P	Brookes et al., Cell Stem Cell 2012, PMID: 22305566	GSE34518	0	gene end	1000
RNAPII_S5P	Brookes et al., Cell Stem Cell 2012, PMID: 22305566	GSE34518	-500	500	500
RNAPII_S7P	Brookes et al., Cell Stem Cell 2012, PMID: 22305566	GSE34518	-500	500	150
RYBP	Morey et al., Cell Rep 2013, PMID: 23273917	GSE42466	-500	500	1000
SIN3A	Williams et al., Nature 2011, PMID: 21490601	GSE24841	-500	500	500
SMC1	Kagey et al., Nature 2010, PMID: 20720539	GSE22562	-500	500	500
SMC3	Kagey et al., Nature 2010, PMID: 20720539	GSE22562	-500	500	500
SOX2	Newmann et al., Cell 2013, PMID: 23582322	GSE44286	-500	500	150
SUZ12	Kaneko et al., Nat Struct Mol Biol 2013, PMID: 24141703	GSE49431	-750	750	1000
TAF1	Liu et al., Cell 2011, PMID: 21884934	GSE30959	-500	500	150
TAF3	Liu et al., Cell 2011, PMID: 21884935	GSE30959	-750	750	500
TBP	Liu et al., Cell 2011, PMID: 21884936	GSE30959	-500	500	150
TCF3	Marson et al., Cell 2008, PMID: 18692474	GSE11724	-500	500	500
TCFCP2I1	Chen et al., Cell 2008, PMID: 18555785	GSE11431	-500	500	500
TET1	Williams et al., Nature 2011, PMID: 21490601	GSE24841	-500	500	500
YY1	Sigova et al., Science 2015, PMID: 26516199	GSE68195	-500	500	500
ZNF384	Mouse ENCODE	GSE36030	-500	500	500
Bisulfite-Seq data
name	source/reference	description
DNA methylation (BS-Seq)	Stadler et al., Nature 2011, PMID: 22170606	mean(%methylated) of CG sites within 1000bp around gene promoter (TSS)
Genomic data
name	source/reference	description
distance to TAD border	Dixon et al., Nature 2012, PMID: 22495300	distance of each gene promoter (TSS) to the border of the closest topological domain
distance to Xist	gencode version M9 gene annotation on mm10 lifted over to mm9	distance of each gene promoter (TSS) to the TSS of the Xist locus
distance to LADs	Peric-Hupkes et al., Mol Cell 2010, PMID: 20513434	distance of each gene promoter (TSS) to the closest Lamina Associated Domain boundary
overlap with LADs	Peric-Hupkes et al., Mol Cell 2010, PMID: 20513435	number of Lamina Associated Domains overlapping with the 1000bp region around each gene promoter (TSS)
gene density	gencode version M9 gene annotation on mm10 lifted over to mm9	number of annotated genes within 1mb region around each gene promoter (TSS)
overlap with Xist entry sites	Engreitz et al., Science 2013, PMID: 23828888	overlap of each gene with Xist entry sites
number interactions (HiC) all	Schoenfelder et al., Genome Res 2015, PMID: 25752748	number of HiC interactions for each promoter
mean interaction strength (HiC) all	Schoenfelder et al., Genome Res 2015, PMID: 25752749	sum(HiC interactions strength) of HiC interactions for each promoter divided by number_inter_other
number interactions (HiC) promoter	Schoenfelder et al., Genome Res 2015, PMID: 25752750	number of HiC interactions for each promoter with other promoters
mean interaction strength (HiC) promoter	Schoenfelder et al., Genome Res 2015, PMID: 25752751	sum(HiC interactions strength) of HiC interactions for each promoter with other promoters divided by number_inter_promoter
mean interaction strength (HiC) xist	Schoenfelder et al., Genome Res 2015, PMID: 25752752	HiC interactions strength of each promoter with xist locus
number interactions (HiCap) promoter	Sahlén et al., Genome Biol 2015, PMID: 26313521	total number of interactions (mean over two replicates) of each gene’s promoter with to other promoters only
number interactions (HiCap) enhancer	Sahlén et al., Genome Biol 2015, PMID: 26313522	total number of interactions (mean over two replicates) of each gene’s promoter with to enhancers only
number interactions (HiCap) all	Sahlén et al., Genome Biol 2015, PMID: 26313523	total number of interactions (mean over two replicates) of each gene’s promoter with to both enhancers and promoters
overlap with CpG islands	CpG islands (UCSC for mm9)	Number of annotated CpG islands within 1000bp region around each gene promoter (TSS)
CpG content	CpG content (mm9 genome)	normalized CpG content within the 1000bp region of each gene promoter, computed as the ratio of observed over expected CG dinucleotides (computation taken from Marsico et al. Genome Biology 2013)
distance to LINEs	Penzkofer et al., Nucleic Acids Res 2016, PMID: 27924012, (Mouse Full-Length LINE-1 Elements [FLnI-L1] )	distance of each gene promoter (TSS) to the closest full-length LINE (liftover to mm9)
LINE density	Penzkofer et al., Nucleic Acids Res 2016, PMID: 27924012, (Mouse Full-Length LINE-1 Elements [FLnI-L1] )	number of full-length LINEs (liftover to mm9) within 750kb region around each gene promoter (TSS)

## Sheet: chip_seq_data_filtering
	feature	GEO accession number		Legend
	5fC	GSE40148		removed because coverage was < 3 Mio.
	5hmC	GSE28682		removed due to bad deepTools heatmap
	5mC	GSE28682		removed because better experiment available for same feature
	BRG1	GSE14344
	CBX3	GSE44242
	CBX7	GSE42466
	CDK9	GSE44286
	CMYC	GSE11431
	COREST	GSE27841
	CTCF	GSE25777
	CTCF	GSE28247
	CTCF	GSE29184
	E2F1	GSE11431
	ESRRB	GSE11431
	EZH2	GSE46536
	EZH2	GSE49431
	EZH2	GSE55697
	EZH2	GSE66830
	H2Aub1	GSE34518
	H2AZ	GSE36114
	H2AZ	GSE39237
	H2AZ	GSE53208
	H3K27ac	GSE31039
	H3K27ac	GSE36114
	H3K27me3	GSE12241
	H3K27me3	GSE36114
	H3K27me3	GSE41589
	H3K27me3	GSE47949
	H3K27me3	GSE55697
	H3K36me2	GSE41589
	H3K36me3	GSE11724
	H3K36me3	GSE12241
	H3K36me3	GSE31039
	H3K36me3	GSE34518
	H3K36me3	GSE36114
	H3K36me3	GSE41589
	H3K4me1	GSE11172
	H3K4me1	GSE29184
	H3K4me1	GSE31039
	H3K4me1	GSE32218
	H3K4me1	GSE36114
	H3K4me1	GSE47949
	H3K4me2	GSE11172
	H3K4me2	GSE36114
	H3K4me3	GSE11724
	H3K4me3	GSE12241
	H3K4me3	GSE29184
	H3K4me3	GSE31039
	H3K4me3	GSE32218
	H3K4me3	GSE36114
	H3K79me2	GSE11724
	H3K9ac	GSE31039
	H3K9me3	GSE12241
	H3K9me3	GSE18371
	H3K9me3	GSE31039
	H3K9me3	GSE32218
	H3K9me3	GSE47894
	H4K20me3	GSE12241
	HCFC1	GSE36030
	HDAC1	GSE27841
	HDAC2	GSE27841
	HDAC3	GSE116480
	KAP1	GSE41903
	KDM2A	GSE40860
	KDM2B	GSE37930
	KDM2B	GSE40860
	KLF4	GSE11431
	LAMINB	GSE28247
	LSD1	GSE18515
	LSD1	GSE27841
	MAFK	GSE36030
	MAX	GSE48175
	MBD1A	GSE39610
	MBD1B	GSE39610
	MBD2A	GSE39610
	MBD2T	GSE39610
	MBD3A	GSE39610
	MBD4	GSE39610
	MECP2	GSE39610
	MED1	GSE22562
	MED12	GSE22562
	MI2B	GSE27841
	MLL2	GSE48172
	NANOG	GSE11431
	NANOG	GSE11724
	NANOG	GSE44286
	NIPBL	GSE22562
	NMYC	GSE11431
	OCT4	GSE11431
	OCT4	GSE11724
	OCT4	GSE44286
	OGT	GSE39154
	P300	GSE11431
	P300	GSE28247
	P300	GSE29184
	PHF19	GSE41589
	PHF19	GSE41609
	RAD21	GSE25777
	REST	GSE27841
	RING1B	GSE34518
	RING1B	GSE42466
	RING1B	GSE55697
	RNAPII	GSE12241
	RNAPII	GSE28247
	RNAPII	GSE29184
	RNAPII_8WG16	GSE34518
	RNAPII_S2P	GSE34518
	RNAPII_S5P	GSE34518
	RNAPII_S7P	GSE34518
	RYBP	GSE42466
	SETDB1	GSE18371
	SIN3A	GSE24841
	SIN3A	GSE24841
	SMAD1	GSE11431
	SMC1	GSE22562
	SMC3	GSE22562
	SOX2	GSE11431
	SOX2	GSE11724
	SOX2	GSE44286
	STAT3	GSE11431
	SUZ12	GSE11431
	SUZ12	GSE11724
	SUZ12	GSE42466
	SUZ12	GSE44286
	SUZ12	GSE49431
	SUZ12	GSE55697
	SUZ12	GSE66830
	TAF1	GSE30959
	TAF1	GSE36114
	TAF3	GSE30959
	TBP	GSE30959
	TCF3	GSE11724
	TCFCP2I1	GSE11431
	TET1_C	GSE24841
	TET1_N	GSE24841
	YY1	GSE68195
	ZC3H11A	GSE36030
	ZNF384	GSE36030
